# Supplementary material for: Incomplete antiviral treatment may induce longer durations of viral shedding during SARS-CoV-2 infection
Source: Life Sci Alliance. 2021 Aug 3;4(10):e202101049. doi: 10.26508/lsa.202101049 (PMC8340032; doi:10.26508/lsa.202101049)
Supplement: Supplementary file 3 [file LSA-2021-01049_SdataFS1.xlsx]

## Sheet: A
Time	cell0	cell0.3	cell0.5	cell0.9	cell1	viral0	viral0.3	viral0.5	viral0.9	viral1
0	1	1	1	1	1	3.45637	3.45637	3.45637	3.45637	3.45637
0.01	0.999949	0.999949	0.999949	0.999949	0.999949	3.52477	3.52477	3.52477	3.52477	3.52477
0.02	0.999889	0.999889	0.999889	0.999889	0.999889	3.59317	3.59317	3.59317	3.59317	3.59317
0.03	0.999819	0.999819	0.999819	0.999819	0.999819	3.66157	3.66157	3.66157	3.66157	3.66157
0.04	0.999737	0.999737	0.999737	0.999737	0.999737	3.72996	3.72996	3.72996	3.72996	3.72996
0.05	0.999641	0.999641	0.999641	0.999641	0.999641	3.79834	3.79834	3.79834	3.79834	3.79834
0.06	0.999528	0.999528	0.999528	0.999528	0.999528	3.86672	3.86672	3.86672	3.86672	3.86672
0.07	0.999396	0.999396	0.999396	0.999396	0.999396	3.93509	3.93509	3.93509	3.93509	3.93509
0.08	0.999242	0.999242	0.999242	0.999242	0.999242	4.00345	4.00345	4.00345	4.00345	4.00345
0.09	0.999062	0.999062	0.999062	0.999062	0.999062	4.07179	4.07179	4.07179	4.07179	4.07179
0.1	0.998851	0.998851	0.998851	0.998851	0.998851	4.14012	4.14012	4.14012	4.14012	4.14012
0.11	0.998604	0.998604	0.998604	0.998604	0.998604	4.20844	4.20844	4.20844	4.20844	4.20844
0.12	0.998315	0.998315	0.998315	0.998315	0.998315	4.27673	4.27673	4.27673	4.27673	4.27673
0.13	0.997977	0.997977	0.997977	0.997977	0.997977	4.345	4.345	4.345	4.345	4.345
0.14	0.997582	0.997582	0.997582	0.997582	0.997582	4.41325	4.41325	4.41325	4.41325	4.41325
0.15	0.99712	0.99712	0.99712	0.99712	0.99712	4.48146	4.48146	4.48146	4.48146	4.48146
0.16	0.996579	0.996579	0.996579	0.996579	0.996579	4.54964	4.54964	4.54964	4.54964	4.54964
0.17	0.995946	0.995946	0.995946	0.995946	0.995946	4.61777	4.61777	4.61777	4.61777	4.61777
0.18	0.995207	0.995207	0.995207	0.995207	0.995207	4.68586	4.68586	4.68586	4.68586	4.68586
0.19	0.994343	0.994343	0.994343	0.994343	0.994343	4.75388	4.75388	4.75388	4.75388	4.75388
0.2	0.993333	0.993333	0.993333	0.993333	0.993333	4.82184	4.82184	4.82184	4.82184	4.82184
0.21	0.992153	0.992153	0.992153	0.992153	0.992153	4.88972	4.88972	4.88972	4.88972	4.88972
0.22	0.990775	0.990775	0.990775	0.990775	0.990775	4.95751	4.95751	4.95751	4.95751	4.95751
0.23	0.989167	0.989167	0.989167	0.989167	0.989167	5.02518	5.02518	5.02518	5.02518	5.02518
0.24	0.987291	0.987291	0.987291	0.987291	0.987291	5.09273	5.09273	5.09273	5.09273	5.09273
0.25	0.985103	0.985103	0.985103	0.985103	0.985103	5.16013	5.16013	5.16013	5.16013	5.16013
0.26	0.982553	0.982553	0.982553	0.982553	0.982553	5.22736	5.22736	5.22736	5.22736	5.22736
0.27	0.979585	0.979585	0.979585	0.979585	0.979585	5.29439	5.29439	5.29439	5.29439	5.29439
0.28	0.976131	0.976131	0.976131	0.976131	0.976131	5.36118	5.36118	5.36118	5.36118	5.36118
0.29	0.972117	0.972117	0.972117	0.972117	0.972117	5.42771	5.42771	5.42771	5.42771	5.42771
0.3	0.967458	0.967458	0.967458	0.967458	0.967458	5.49391	5.49391	5.49391	5.49391	5.49391
0.31	0.962058	0.962058	0.962058	0.962058	0.962058	5.55975	5.55975	5.55975	5.55975	5.55975
0.32	0.95581	0.95581	0.95581	0.95581	0.95581	5.62517	5.62517	5.62517	5.62517	5.62517
0.33	0.948592	0.948592	0.948592	0.948592	0.948592	5.69009	5.69009	5.69009	5.69009	5.69009
0.34	0.940274	0.940274	0.940274	0.940274	0.940274	5.75445	5.75445	5.75445	5.75445	5.75445
0.35	0.930712	0.930712	0.930712	0.930712	0.930712	5.81815	5.81815	5.81815	5.81815	5.81815
0.36	0.919752	0.919752	0.919752	0.919752	0.919752	5.88111	5.88111	5.88111	5.88111	5.88111
0.37	0.907231	0.907231	0.907231	0.907231	0.907231	5.9432	5.9432	5.9432	5.9432	5.9432
0.38	0.892982	0.892982	0.892982	0.892982	0.892982	6.00433	6.00433	6.00433	6.00433	6.00433
0.39	0.876838	0.876838	0.876838	0.876838	0.876838	6.06434	6.06434	6.06434	6.06434	6.06434
0.4	0.858636	0.858636	0.858636	0.858636	0.858636	6.1231	6.1231	6.1231	6.1231	6.1231
0.41	0.83823	0.83823	0.83823	0.83823	0.83823	6.18044	6.18044	6.18044	6.18044	6.18044
0.42	0.815497	0.815497	0.815497	0.815497	0.815497	6.23621	6.23621	6.23621	6.23621	6.23621
0.43	0.79035	0.79035	0.79035	0.79035	0.79035	6.29023	6.29023	6.29023	6.29023	6.29023
0.44	0.762751	0.762751	0.762751	0.762751	0.762751	6.34231	6.34231	6.34231	6.34231	6.34231
0.45	0.732721	0.732721	0.732721	0.732721	0.732721	6.39229	6.39229	6.39229	6.39229	6.39229
0.46	0.700356	0.700356	0.700356	0.700356	0.700356	6.43998	6.43998	6.43998	6.43998	6.43998
0.47	0.66583	0.66583	0.66583	0.66583	0.66583	6.48521	6.48521	6.48521	6.48521	6.48521
0.48	0.629402	0.629402	0.629402	0.629402	0.629402	6.52785	6.52785	6.52785	6.52785	6.52785
0.49	0.591416	0.591416	0.591416	0.591416	0.591416	6.56775	6.56775	6.56775	6.56775	6.56775
0.5	0.552287	0.552287	0.552287	0.552287	0.552287	6.60483	6.59263	6.57582	6.56717	6.56277
0.51	0.51249	0.513592	0.515061	0.515796	0.516163	6.639	6.61549	6.58303	6.56629	6.5578
0.52	0.472538	0.475664	0.479764	0.481784	0.482787	6.67025	6.63635	6.5894	6.56515	6.55282
0.53	0.432952	0.438809	0.4464	0.450099	0.451925	6.69858	6.65526	6.595	6.56375	6.54784
0.54	0.394238	0.403296	0.414953	0.420593	0.423365	6.72403	6.67228	6.59986	6.56212	6.54286
0.55	0.356858	0.369353	0.385392	0.393124	0.396915	6.74668	6.6875	6.60403	6.56028	6.53788
0.56	0.32121	0.337157	0.357672	0.367559	0.3724	6.76665	6.70099	6.60755	6.55823	6.5329
0.57	0.287613	0.306841	0.331737	0.343768	0.349662	6.78408	6.71285	6.61045	6.55599	6.52792
0.58	0.256299	0.278487	0.307521	0.321632	0.328555	6.79913	6.72318	6.61279	6.55357	6.52294
0.59	0.22741	0.252133	0.284952	0.301036	0.308949	6.81196	6.73209	6.61459	6.55099	6.51796
0.6	0.201009	0.227779	0.263952	0.281873	0.290722	6.82276	6.73968	6.6159	6.54826	6.51298
0.61	0.177086	0.20539	0.244442	0.264042	0.273767	6.83171	6.74604	6.61674	6.54539	6.508
0.62	0.15557	0.184903	0.226338	0.24745	0.257982	6.839	6.75129	6.61716	6.54238	6.50302
0.63	0.136349	0.166235	0.209559	0.232007	0.243277	6.84478	6.75552	6.61717	6.53925	6.49804
0.64	0.119277	0.149288	0.194023	0.217632	0.229568	6.84924	6.75881	6.61682	6.53601	6.49306
0.65	0.104188	0.133953	0.179651	0.204248	0.21678	6.85251	6.76127	6.61613	6.53266	6.48808
0.66	0.0909088	0.120115	0.166364	0.191784	0.204841	6.85474	6.76296	6.61513	6.52921	6.4831
0.67	0.0792623	0.107658	0.154089	0.180173	0.193689	6.85605	6.76396	6.61383	6.52567	6.47812
0.68	0.069077	0.0964672	0.142753	0.169353	0.183263	6.85656	6.76435	6.61226	6.52204	6.47315
0.69	0.0601902	0.0864307	0.132289	0.159268	0.173512	6.85637	6.76418	6.61044	6.51833	6.46817
0.7	0.0524501	0.0774419	0.122632	0.149864	0.164384	6.85556	6.76351	6.60839	6.51455	6.46319
0.71	0.0457179	0.0694003	0.113723	0.141092	0.155836	6.85422	6.7624	6.60613	6.5107	6.45821
0.72	0.0398678	0.0622122	0.105504	0.132906	0.147824	6.85242	6.76089	6.60368	6.50678	6.45323
0.73	0.0347875	0.0557909	0.0979215	0.125264	0.140311	6.85021	6.75902	6.60104	6.5028	6.44825
0.74	0.030377	0.0500572	0.0909268	0.118128	0.133261	6.84765	6.75684	6.59823	6.49877	6.44327
0.75	0.0265483	0.0449386	0.0844735	0.11146	0.126641	6.84479	6.75436	6.59528	6.49468	6.43829
0.76	0.0232241	0.0403694	0.078519	0.105228	0.120422	6.84167	6.75164	6.59218	6.49054	6.43331
0.77	0.020337	0.0362905	0.0730235	0.0993999	0.114576	6.83831	6.74868	6.58895	6.48635	6.42833
0.78	0.0178283	0.0326486	0.0679506	0.0939475	0.109077	6.83475	6.74553	6.58559	6.48212	6.42335
0.79	0.015647	0.0293959	0.0632663	0.088844	0.103902	6.83102	6.74219	6.58213	6.47785	6.41837
0.8	0.013749	0.0264896	0.0589396	0.0840651	0.0990283	6.82714	6.73869	6.57856	6.47355	6.41339
0.81	0.012096	0.0238917	0.0549418	0.0795878	0.0944362	6.82313	6.73505	6.5749	6.4692	6.40841
0.82	0.0106552	0.0215682	0.0512465	0.0753911	0.0901071	6.819	6.73127	6.57114	6.46483	6.40343
0.83	0.00939793	0.0194888	0.0478294	0.0714556	0.0860234	6.81477	6.72738	6.56731	6.46042	6.39845
0.84	0.0082998	0.0176266	0.0446681	0.0677632	0.0821693	6.81045	6.72339	6.5634	6.45598	6.39348
0.85	0.00733957	0.0159578	0.0417423	0.0642973	0.0785299	6.80606	6.7193	6.55942	6.45151	6.3885
0.86	0.00649898	0.0144611	0.039033	0.0610422	0.0750912	6.8016	6.71513	6.55538	6.44702	6.38352
0.87	0.00576226	0.0131178	0.0365231	0.0579837	0.0718407	6.79708	6.71089	6.55127	6.44251	6.37854
0.88	0.00511583	0.0119111	0.0341966	0.0551085	0.0687663	6.79251	6.70657	6.54711	6.43797	6.37356
0.89	0.00454791	0.0108262	0.0320391	0.0524043	0.065857	6.7879	6.7022	6.5429	6.43341	6.36858
0.9	0.00404838	0.00985003	0.0300373	0.0498597	0.0631026	6.78324	6.69777	6.53864	6.42883	6.3636
0.91	0.00360846	0.00897088	0.0281788	0.047464	0.0604934	6.77855	6.69329	6.53434	6.42423	6.35862
0.92	0.00322056	0.00817842	0.0264525	0.0452075	0.0580207	6.77383	6.68877	6.52999	6.41961	6.35364
0.93	0.0028781	0.00746344	0.0248481	0.043081	0.055676	6.76908	6.68421	6.52561	6.41497	6.34866
0.94	0.00257538	0.00681778	0.0233561	0.041076	0.0534518	6.7643	6.67961	6.52119	6.41032	6.34368
0.95	0.00230747	0.0062342	0.021968	0.0391847	0.0513407	6.75951	6.67498	6.51674	6.40566	6.3387
0.96	0.00207006	0.00570622	0.0206756	0.0373997	0.0493362	6.7547	6.67032	6.51225	6.40097	6.33372
0.97	0.00185942	0.00522812	0.0194718	0.0357143	0.0474319	6.74986	6.66563	6.50774	6.39628	6.32874
0.98	0.00167231	0.00479478	0.0183498	0.0341222	0.0456219	6.74502	6.66092	6.5032	6.39157	6.32376
0.99	0.0015059	0.00440164	0.0173034	0.0326175	0.0439009	6.74016	6.65619	6.49864	6.38686	6.31878
1	0.00135771	0.00404465	0.016327	0.0311946	0.0422636	6.73529	6.65144	6.49405	6.38213	6.3138
1.01	0.0012256	0.00372018	0.0154154	0.0298486	0.0407054	6.73041	6.64666	6.48944	6.37738	6.30883
1.02	0.00110767	0.00342501	0.0145638	0.0285746	0.0392218	6.72552	6.64188	6.48481	6.37263	6.30385
1.03	0.00100229	0.00315623	0.0137677	0.0273683	0.0378085	6.72062	6.63707	6.48016	6.36787	6.29887
1.04	0.000907998	0.00291127	0.0130232	0.0262255	0.0364617	6.71571	6.63226	6.47549	6.3631	6.29389
1.05	0.000823538	0.00268781	0.0123265	0.0251423	0.0351777	6.7108	6.62743	6.47081	6.35832	6.28891
1.06	0.000747797	0.00248379	0.0116741	0.0241153	0.033953	6.70588	6.62259	6.46611	6.35354	6.28393
1.07	0.000679796	0.00229734	0.0110629	0.023141	0.0327844	6.70095	6.61774	6.4614	6.34874	6.27895
1.08	0.000618676	0.00212681	0.0104899	0.0222164	0.0316689	6.69602	6.61288	6.45667	6.34394	6.27397
1.09	0.000563679	0.00197069	0.00995255	0.0213384	0.0306036	6.69109	6.60801	6.45193	6.33913	6.26899
1.1	0.000514137	0.00182764	0.00944822	0.0205045	0.0295859	6.68615	6.60313	6.44717	6.33432	6.26401
1.11	0.00046946	0.00169646	0.00897466	0.0197119	0.0286133	6.68121	6.59825	6.44241	6.3295	6.25903
1.12	0.000429127	0.00157605	0.00852974	0.0189584	0.0276834	6.67626	6.59335	6.43763	6.32467	6.25405
1.13	0.000392677	0.00146545	0.0081115	0.0182418	0.0267939	6.67131	6.58846	6.43285	6.31983	6.24907
1.14	0.000359701	0.00136376	0.00771813	0.0175598	0.0259429	6.66636	6.58355	6.42806	6.315	6.24409
1.15	0.000329836	0.00127019	0.00734794	0.0169106	0.0251282	6.66141	6.57865	6.42325	6.31015	6.23911
1.16	0.000302761	0.00118401	0.00699939	0.0162924	0.0243482	6.65646	6.57373	6.41844	6.3053	6.23413
1.17	0.000278191	0.00110459	0.00667103	0.0157033	0.0236009	6.6515	6.56882	6.41362	6.30045	6.22916
1.18	0.000255871	0.00103133	0.00636152	0.0151419	0.0228849	6.64654	6.56389	6.40879	6.29559	6.22418
1.19	0.000235575	0.000963699	0.00606964	0.0146066	0.0221985	6.64158	6.55897	6.40396	6.29073	6.2192
1.2	0.000217101	0.000901216	0.00579423	0.0140959	0.0215403	6.63662	6.55404	6.39912	6.28586	6.21422
1.21	0.000200269	0.000843443	0.00553423	0.0136086	0.0209088	6.63165	6.54911	6.39427	6.28099	6.20924
1.22	0.000184919	0.000789985	0.00528866	0.0131434	0.0203029	6.62669	6.54417	6.38942	6.27612	6.20426
1.23	0.000170906	0.000740481	0.00505659	0.0126991	0.0197213	6.62172	6.53923	6.38456	6.27124	6.19928
1.24	0.000158102	0.000694603	0.00483717	0.0122746	0.0191627	6.61676	6.53429	6.3797	6.26636	6.1943
1.25	0.000146392	0.000652055	0.00462961	0.0118689	0.0186261	6.61179	6.52935	6.37483	6.26147	6.18932
1.26	0.000135673	0.000612565	0.00443317	0.011481	0.0181106	6.60682	6.52441	6.36996	6.25658	6.18434
1.27	0.000125852	0.000575886	0.00424716	0.0111099	0.017615	6.60185	6.51946	6.36508	6.25169	6.17936
1.28	0.000116845	0.000541795	0.00407095	0.0107549	0.0171384	6.59688	6.51451	6.3602	6.2468	6.17438
1.29	0.000108578	0.000510084	0.00390394	0.0104151	0.0166801	6.59191	6.50956	6.35531	6.2419	6.1694
1.3	0.000100984	0.000480569	0.00374557	0.0100897	0.0162391	6.58694	6.50461	6.35042	6.23701	6.16442
1.31	9.4e-05	0.000453076	0.00359533	0.00977799	0.0158146	6.58197	6.49965	6.34553	6.2321	6.15944
1.32	8.76e-05	0.00042745	0.00345273	0.00947931	0.015406	6.57699	6.4947	6.34063	6.2272	6.15446
1.33	8.17e-05	0.000403548	0.00331732	0.00919301	0.0150124	6.57202	6.48974	6.33573	6.22229	6.14948
1.34	7.62e-05	0.000381239	0.00318868	0.00891847	0.0146333	6.56705	6.48478	6.33083	6.21739	6.14451
1.35	7.12e-05	0.000360402	0.00306642	0.00865512	0.0142679	6.56207	6.47982	6.32593	6.21248	6.13953
1.36	6.65e-05	0.000340928	0.00295016	0.00840242	0.0139158	6.5571	6.47486	6.32102	6.20756	6.13455
1.37	6.22e-05	0.000322715	0.00283957	0.00815986	0.0135762	6.55213	6.4699	6.31611	6.20265	6.12957
1.38	5.83e-05	0.000305671	0.00273432	0.00792695	0.0132487	6.54715	6.46494	6.31119	6.19773	6.12459
1.39	5.46e-05	0.00028971	0.00263412	0.00770324	0.0129328	6.54218	6.45998	6.30628	6.19282	6.11961
1.4	5.12e-05	0.000274755	0.00253867	0.00748828	0.0126279	6.5372	6.45501	6.30136	6.1879	6.11463
1.41	4.8e-05	0.000260733	0.00244772	0.00728168	0.0123336	6.53223	6.45005	6.29644	6.18298	6.10965
1.42	4.51e-05	0.000247578	0.00236101	0.00708305	0.0120494	6.52725	6.44508	6.29151	6.17805	6.10467
1.43	4.24e-05	0.000235229	0.00227832	0.00689201	0.0117749	6.52227	6.44011	6.28659	6.17313	6.09969
1.44	3.98e-05	0.000223629	0.00219942	0.00670821	0.0115098	6.5173	6.43515	6.28166	6.1682	6.09471
1.45	3.75e-05	0.000212726	0.00212412	0.00653134	0.0112535	6.51232	6.43018	6.27673	6.16328	6.08973
1.46	3.53e-05	0.000202473	0.00205221	0.00636107	0.0110059	6.50734	6.42521	6.2718	6.15835	6.08475
1.47	3.33e-05	0.000192825	0.00198352	0.00619712	0.0107664	6.50237	6.42024	6.26687	6.15342	6.07977
1.48	3.14e-05	0.000183742	0.00191789	0.00603919	0.0105348	6.49739	6.41527	6.26194	6.14849	6.07479
1.49	2.96e-05	0.000175184	0.00185514	0.00588702	0.0103108	6.49241	6.4103	6.257	6.14355	6.06981
1.5	2.8e-05	0.000167118	0.00179512	0.00574037	0.0100941	6.48744	6.40533	6.25207	6.13862	6.06484
1.51	2.64e-05	0.000159511	0.00173771	0.00559898	0.00988429	6.48246	6.40036	6.24713	6.13369	6.05986
1.52	2.5e-05	0.000152333	0.00168276	0.00546263	0.00968121	6.47748	6.39539	6.24219	6.12875	6.05488
1.53	2.37e-05	0.000145556	0.00163015	0.00533111	0.00948458	6.4725	6.39042	6.23725	6.12381	6.0499
1.54	2.24e-05	0.000139154	0.00157976	0.0052042	0.00929413	6.46753	6.38545	6.23231	6.11888	6.04492
1.55	2.12e-05	0.000133104	0.00153148	0.00508171	0.00910964	6.46255	6.38048	6.22737	6.11394	6.03994
1.56	2.01e-05	0.000127382	0.00148521	0.00496347	0.00893087	6.45757	6.37551	6.22242	6.109	6.03496
1.57	1.91e-05	0.000121969	0.00144084	0.00484927	0.00875761	6.45259	6.37053	6.21748	6.10406	6.02998
1.58	1.81e-05	0.000116844	0.00139829	0.00473897	0.00858964	6.44762	6.36556	6.21253	6.09911	6.025
1.59	1.72e-05	0.000111991	0.00135746	0.0046324	0.00842678	6.44264	6.36059	6.20758	6.09417	6.02002
1.6	1.64e-05	0.000107393	0.00131827	0.0045294	0.00826882	6.43766	6.35561	6.20264	6.08923	6.01504
1.61	1.56e-05	0.000103033	0.00128064	0.00442983	0.00811559	6.43268	6.35064	6.19769	6.08429	6.01006
1.62	1.48e-05	9.89e-05	0.00124451	0.00433355	0.00796692	6.4277	6.34567	6.19274	6.07934	6.00508
1.63	1.41e-05	9.5e-05	0.00120978	0.00424043	0.00782263	6.42273	6.34069	6.18779	6.07439	6.0001
1.64	1.34e-05	9.12e-05	0.00117642	0.00415035	0.00768258	6.41775	6.33572	6.18284	6.06945	5.99512
1.65	1.28e-05	8.77e-05	0.00114433	0.00406317	0.00754659	6.41277	6.33074	6.17788	6.0645	5.99014
1.66	1.22e-05	8.43e-05	0.00111348	0.0039788	0.00741454	6.40779	6.32577	6.17293	6.05955	5.98516
1.67	1.16e-05	8.12e-05	0.0010838	0.00389711	0.00728628	6.40281	6.32079	6.16798	6.05461	5.98019
1.68	1.11e-05	7.81e-05	0.00105524	0.00381801	0.00716167	6.39783	6.31582	6.16302	6.04966	5.97521
1.69	1.06e-05	7.52e-05	0.00102775	0.00374138	0.00704059	6.39285	6.31084	6.15807	6.04471	5.97023
1.7	1.01e-05	7.25e-05	0.00100127	0.00366715	0.00692291	6.38788	6.30587	6.15311	6.03976	5.96525
1.71	9.71e-06	6.98e-05	0.000975774	0.00359522	0.00680852	6.3829	6.30089	6.14816	6.03481	5.96027
1.72	9.29e-06	6.73e-05	0.000951207	0.00352549	0.00669731	6.37792	6.29592	6.1432	6.02986	5.95529
1.73	8.89e-06	6.5e-05	0.00092753	0.00345789	0.00658915	6.37294	6.29094	6.13824	6.0249	5.95031
1.74	8.51e-06	6.27e-05	0.000904704	0.00339235	0.00648396	6.36796	6.28597	6.13329	6.01995	5.94533
1.75	8.16e-06	6.05e-05	0.000882692	0.00332877	0.00638162	6.36298	6.28099	6.12833	6.015	5.94035
1.76	7.82e-06	5.84e-05	0.00086146	0.00326709	0.00628205	6.358	6.27601	6.12337	6.01005	5.93537
1.77	7.5e-06	5.65e-05	0.000840974	0.00320724	0.00618515	6.35303	6.27104	6.11841	6.00509	5.93039
1.78	7.2e-06	5.46e-05	0.000821203	0.00314915	0.00609083	6.34805	6.26606	6.11345	6.00014	5.92541
1.79	6.91e-06	5.28e-05	0.000802115	0.00309277	0.00599901	6.34307	6.26109	6.10849	5.99518	5.92043
1.8	6.64e-06	5.11e-05	0.000783682	0.00303802	0.00590961	6.33809	6.25611	6.10353	5.99023	5.91545
1.81	6.38e-06	4.94e-05	0.000765878	0.00298484	0.00582254	6.33311	6.25113	6.09857	5.98527	5.91047
1.82	6.13e-06	4.78e-05	0.000748676	0.0029332	0.00573773	6.32813	6.24616	6.09361	5.98032	5.90549
1.83	5.9e-06	4.63e-05	0.000732051	0.00288302	0.00565511	6.32315	6.24118	6.08865	5.97536	5.90052
1.84	5.68e-06	4.49e-05	0.00071598	0.00283426	0.00557461	6.31817	6.2362	6.08368	5.9704	5.89554
1.85	5.47e-06	4.35e-05	0.000700441	0.00278687	0.00549615	6.31319	6.23122	6.07872	5.96545	5.89056
1.86	5.27e-06	4.22e-05	0.000685411	0.0027408	0.00541969	6.30821	6.22625	6.07376	5.96049	5.88558
1.87	5.07e-06	4.09e-05	0.000670871	0.00269601	0.00534515	6.30324	6.22127	6.0688	5.95553	5.8806
1.88	4.89e-06	3.97e-05	0.000656802	0.00265244	0.00527247	6.29826	6.21629	6.06383	5.95057	5.87562
1.89	4.72e-06	3.85e-05	0.000643183	0.00261007	0.00520159	6.29328	6.21132	6.05887	5.94561	5.87064
1.9	4.55e-06	3.74e-05	0.000629999	0.00256885	0.00513247	6.2883	6.20634	6.0539	5.94066	5.86566
1.91	4.39e-06	3.63e-05	0.000617232	0.00252874	0.00506504	6.28332	6.20136	6.04894	5.9357	5.86068
1.92	4.24e-06	3.53e-05	0.000604866	0.00248971	0.00499926	6.27834	6.19638	6.04397	5.93074	5.8557
1.93	4.1e-06	3.43e-05	0.000592885	0.00245171	0.00493507	6.27336	6.19141	6.03901	5.92578	5.85072
1.94	3.96e-06	3.33e-05	0.000581275	0.00241472	0.00487243	6.26838	6.18643	6.03404	5.92082	5.84574
1.95	3.83e-06	3.24e-05	0.000570022	0.0023787	0.00481129	6.2634	6.18145	6.02908	5.91586	5.84076
1.96	3.7e-06	3.15e-05	0.000559112	0.00234362	0.0047516	6.25842	6.17647	6.02411	5.9109	5.83578
1.97	3.58e-06	3.07e-05	0.000548532	0.00230945	0.00469332	6.25345	6.1715	6.01915	5.90593	5.8308
1.98	3.47e-06	2.99e-05	0.000538271	0.00227616	0.00463642	6.24847	6.16652	6.01418	5.90097	5.82582
1.99	3.36e-06	2.91e-05	0.000528316	0.00224373	0.00458085	6.24349	6.16154	6.00921	5.89601	5.82084
2	3.25e-06	2.83e-05	0.000518657	0.00221212	0.00452657	6.23851	6.15656	6.00425	5.89105	5.81587
2.01	3.15e-06	2.76e-05	0.000509281	0.00218131	0.00447354	6.23353	6.15159	5.99928	5.88609	5.81089
2.02	3.06e-06	2.69e-05	0.00050018	0.00215127	0.00442174	6.22855	6.14661	5.99431	5.88113	5.80591
2.03	2.96e-06	2.62e-05	0.000491344	0.00212198	0.00437111	6.22357	6.14163	5.98934	5.87616	5.80093
2.04	2.87e-06	2.56e-05	0.000482762	0.00209342	0.00432164	6.21859	6.13665	5.98438	5.8712	5.79595
2.05	2.79e-06	2.5e-05	0.000474426	0.00206557	0.00427328	6.21361	6.13167	5.97941	5.86624	5.79097
2.06	2.71e-06	2.43e-05	0.000466327	0.00203839	0.00422601	6.20863	6.1267	5.97444	5.86128	5.78599
2.07	2.63e-06	2.38e-05	0.000458457	0.00201188	0.0041798	6.20365	6.12172	5.96947	5.85631	5.78101
2.08	2.55e-06	2.32e-05	0.000450807	0.00198601	0.00413461	6.19867	6.11674	5.9645	5.85135	5.77603
2.09	2.48e-06	2.27e-05	0.000443371	0.00196077	0.00409042	6.1937	6.11176	5.95953	5.84638	5.77105
2.1	2.41e-06	2.21e-05	0.000436141	0.00193613	0.0040472	6.18872	6.10678	5.95456	5.84142	5.76607
2.11	2.35e-06	2.16e-05	0.00042911	0.00191207	0.00400493	6.18374	6.1018	5.9496	5.83646	5.76109
2.12	2.28e-06	2.11e-05	0.00042227	0.00188859	0.00396357	6.17876	6.09683	5.94463	5.83149	5.75611
2.13	2.22e-06	2.07e-05	0.000415616	0.00186565	0.00392311	6.17378	6.09185	5.93966	5.82653	5.75113
2.14	2.16e-06	2.02e-05	0.000409142	0.00184325	0.00388352	6.1688	6.08687	5.93469	5.82156	5.74615
2.15	2.1e-06	1.98e-05	0.000402841	0.00182138	0.00384477	6.16382	6.08189	5.92972	5.8166	5.74117
2.16	2.05e-06	1.93e-05	0.000396707	0.0018	0.00380685	6.15884	6.07691	5.92475	5.81163	5.7362
2.17	2e-06	1.89e-05	0.000390736	0.00177912	0.00376973	6.15386	6.07193	5.91978	5.80667	5.73122
2.18	1.94e-06	1.85e-05	0.000384922	0.00175872	0.00373339	6.14888	6.06696	5.91481	5.8017	5.72624
2.19	1.9e-06	1.81e-05	0.000379259	0.00173878	0.00369781	6.1439	6.06198	5.90984	5.79674	5.72126
2.2	1.85e-06	1.78e-05	0.000373743	0.00171929	0.00366297	6.13892	6.057	5.90487	5.79177	5.71628
2.21	1.8e-06	1.74e-05	0.000368369	0.00170023	0.00362885	6.13394	6.05202	5.8999	5.78681	5.7113
2.22	1.76e-06	1.71e-05	0.000363132	0.00168161	0.00359544	6.12897	6.04704	5.89493	5.78184	5.70632
2.23	1.72e-06	1.67e-05	0.000358029	0.00166339	0.00356271	6.12399	6.04206	5.88995	5.77687	5.70134
2.24	1.68e-06	1.64e-05	0.000353055	0.00164558	0.00353065	6.11901	6.03709	5.88498	5.77191	5.69636
2.25	1.64e-06	1.61e-05	0.000348206	0.00162816	0.00349924	6.11403	6.03211	5.88001	5.76694	5.69138
2.26	1.6e-06	1.58e-05	0.000343477	0.00161112	0.00346847	6.10905	6.02713	5.87504	5.76197	5.6864
2.27	1.56e-06	1.55e-05	0.000338867	0.00159445	0.00343831	6.10407	6.02215	5.87007	5.75701	5.68142
2.28	1.53e-06	1.52e-05	0.000334369	0.00157813	0.00340875	6.09909	6.01717	5.8651	5.75204	5.67644
2.29	1.49e-06	1.49e-05	0.000329982	0.00156217	0.00337979	6.09411	6.01219	5.86013	5.74707	5.67146
2.3	1.46e-06	1.46e-05	0.000325702	0.00154656	0.0033514	6.08913	6.00721	5.85516	5.74211	5.66648
2.31	1.43e-06	1.43e-05	0.000321525	0.00153127	0.00332356	6.08415	6.00224	5.85018	5.73714	5.6615
2.32	1.4e-06	1.41e-05	0.000317449	0.0015163	0.00329628	6.07917	5.99726	5.84521	5.73217	5.65652
2.33	1.37e-06	1.38e-05	0.00031347	0.00150165	0.00326952	6.07419	5.99228	5.84024	5.72721	5.65155
2.34	1.34e-06	1.36e-05	0.000309586	0.00148731	0.00324329	6.06921	5.9873	5.83527	5.72224	5.64657
2.35	1.31e-06	1.34e-05	0.000305794	0.00147327	0.00321756	6.06423	5.98232	5.8303	5.71727	5.64159
2.36	1.28e-06	1.31e-05	0.000302091	0.00145951	0.00319233	6.05926	5.97734	5.82532	5.7123	5.63661
2.37	1.25e-06	1.29e-05	0.000298474	0.00144604	0.00316758	6.05428	5.97236	5.82035	5.70733	5.63163
2.38	1.23e-06	1.27e-05	0.000294941	0.00143285	0.0031433	6.0493	5.96739	5.81538	5.70237	5.62665
2.39	1.2e-06	1.25e-05	0.00029149	0.00141993	0.00311948	6.04432	5.96241	5.81041	5.6974	5.62167
2.4	1.18e-06	1.23e-05	0.000288118	0.00140726	0.00309611	6.03934	5.95743	5.80543	5.69243	5.61669
2.41	1.16e-06	1.21e-05	0.000284823	0.00139486	0.00307319	6.03436	5.95245	5.80046	5.68746	5.61171
2.42	1.14e-06	1.19e-05	0.000281603	0.0013827	0.00305069	6.02938	5.94747	5.79549	5.68249	5.60673
2.43	1.11e-06	1.17e-05	0.000278455	0.00137079	0.00302861	6.0244	5.94249	5.79052	5.67753	5.60175
2.44	1.09e-06	1.15e-05	0.000275378	0.00135911	0.00300694	6.01942	5.93751	5.78554	5.67256	5.59677
2.45	1.07e-06	1.13e-05	0.00027237	0.00134766	0.00298567	6.01444	5.93253	5.78057	5.66759	5.59179
2.46	1.05e-06	1.12e-05	0.000269428	0.00133644	0.00296479	6.00946	5.92756	5.7756	5.66262	5.58681
2.47	1.03e-06	1.1e-05	0.000266552	0.00132544	0.0029443	6.00448	5.92258	5.77063	5.65765	5.58183
2.48	1.01e-06	1.08e-05	0.000263738	0.00131465	0.00292418	5.9995	5.9176	5.76565	5.65268	5.57685
2.49	9.96e-07	1.07e-05	0.000260986	0.00130408	0.00290442	5.99452	5.91262	5.76068	5.64771	5.57188
2.5	9.79e-07	1.05e-05	0.000258293	0.00129371	0.00288502	5.98955	5.90764	5.75571	5.64274	5.5669
2.51	9.62e-07	1.03e-05	0.000255659	0.00128353	0.00286597	5.98457	5.90266	5.75073	5.63778	5.56192
2.52	9.45e-07	1.02e-05	0.000253081	0.00127355	0.00284726	5.97959	5.89768	5.74576	5.63281	5.55694
2.53	9.29e-07	1.01e-05	0.000250559	0.00126377	0.00282889	5.97461	5.8927	5.74079	5.62784	5.55196
2.54	9.13e-07	9.92e-06	0.000248089	0.00125417	0.00281084	5.96963	5.88773	5.73581	5.62287	5.54698
2.55	8.98e-07	9.78e-06	0.000245672	0.00124475	0.00279311	5.96465	5.88275	5.73084	5.6179	5.542
2.56	8.83e-07	9.65e-06	0.000243306	0.0012355	0.00277569	5.95967	5.87777	5.72587	5.61293	5.53702
2.57	8.69e-07	9.52e-06	0.00024099	0.00122643	0.00275858	5.95469	5.87279	5.72089	5.60796	5.53204
2.58	8.55e-07	9.39e-06	0.000238721	0.00121753	0.00274177	5.94971	5.86781	5.71592	5.60299	5.52706
2.59	8.41e-07	9.26e-06	0.000236499	0.00120879	0.00272526	5.94473	5.86283	5.71094	5.59802	5.52208
2.6	8.28e-07	9.14e-06	0.000234324	0.00120022	0.00270902	5.93975	5.85785	5.70597	5.59305	5.5171
2.61	8.15e-07	9.03e-06	0.000232192	0.0011918	0.00269308	5.93477	5.85287	5.701	5.58808	5.51212
2.62	8.02e-07	8.91e-06	0.000230104	0.00118354	0.0026774	5.92979	5.84789	5.69602	5.58311	5.50714
2.63	7.9e-07	8.8e-06	0.000228059	0.00117543	0.00266199	5.92481	5.84292	5.69105	5.57814	5.50216
2.64	7.78e-07	8.69e-06	0.000226055	0.00116746	0.00264685	5.91983	5.83794	5.68607	5.57317	5.49718
2.65	7.67e-07	8.58e-06	0.000224091	0.00115964	0.00263196	5.91486	5.83296	5.6811	5.5682	5.4922
2.66	7.55e-07	8.48e-06	0.000222166	0.00115196	0.00261733	5.90988	5.82798	5.67613	5.56323	5.48723
2.67	7.44e-07	8.37e-06	0.000220279	0.00114442	0.00260294	5.9049	5.823	5.67115	5.55826	5.48225
2.68	7.34e-07	8.27e-06	0.00021843	0.00113701	0.0025888	5.89992	5.81802	5.66618	5.55329	5.47727
2.69	7.23e-07	8.18e-06	0.000216618	0.00112973	0.00257489	5.89494	5.81304	5.6612	5.54832	5.47229
2.7	7.13e-07	8.08e-06	0.00021484	0.00112259	0.00256122	5.88996	5.80806	5.65623	5.54335	5.46731
2.71	7.03e-07	7.99e-06	0.000213098	0.00111556	0.00254777	5.88498	5.80308	5.65126	5.53838	5.46233
2.72	6.93e-07	7.9e-06	0.000211389	0.00110867	0.00253455	5.88	5.79811	5.64628	5.53341	5.45735
2.73	6.84e-07	7.81e-06	0.000209713	0.00110189	0.00252155	5.87502	5.79313	5.64131	5.52844	5.45237
2.74	6.75e-07	7.72e-06	0.00020807	0.00109523	0.00250876	5.87004	5.78815	5.63633	5.52347	5.44739
2.75	6.66e-07	7.64e-06	0.000206457	0.00108869	0.00249617	5.86506	5.78317	5.63136	5.5185	5.44241
2.76	6.57e-07	7.55e-06	0.000204876	0.00108226	0.0024838	5.86008	5.77819	5.62638	5.51352	5.43743
2.77	6.49e-07	7.47e-06	0.000203325	0.00107594	0.00247163	5.8551	5.77321	5.62141	5.50855	5.43245
2.78	6.4e-07	7.39e-06	0.000201802	0.00106972	0.00245965	5.85012	5.76823	5.61643	5.50358	5.42747
2.79	6.32e-07	7.32e-06	0.000200309	0.00106362	0.00244787	5.84514	5.76325	5.61146	5.49861	5.42249
2.8	6.24e-07	7.24e-06	0.000198843	0.00105762	0.00243628	5.84017	5.75827	5.60649	5.49364	5.41751
2.81	6.17e-07	7.17e-06	0.000197405	0.00105172	0.00242487	5.83519	5.75329	5.60151	5.48867	5.41253
2.82	6.09e-07	7.09e-06	0.000195993	0.00104592	0.00241365	5.83021	5.74832	5.59654	5.4837	5.40756
2.83	6.02e-07	7.02e-06	0.000194608	0.00104022	0.00240261	5.82523	5.74334	5.59156	5.47873	5.40258
2.84	5.94e-07	6.95e-06	0.000193248	0.00103461	0.00239174	5.82025	5.73836	5.58659	5.47376	5.3976
2.85	5.87e-07	6.88e-06	0.000191912	0.0010291	0.00238105	5.81527	5.73338	5.58161	5.46879	5.39262
2.86	5.81e-07	6.82e-06	0.000190602	0.00102367	0.00237052	5.81029	5.7284	5.57664	5.46381	5.38764
2.87	5.74e-07	6.75e-06	0.000189314	0.00101834	0.00236016	5.80531	5.72342	5.57166	5.45884	5.38266
2.88	5.67e-07	6.69e-06	0.000188051	0.0010131	0.00234996	5.80033	5.71844	5.56669	5.45387	5.37768
2.89	5.61e-07	6.63e-06	0.00018681	0.00100794	0.00233993	5.79535	5.71346	5.56171	5.4489	5.3727
2.9	5.55e-07	6.57e-06	0.000185591	0.00100287	0.00233005	5.79037	5.70848	5.55674	5.44393	5.36772
2.91	5.48e-07	6.51e-06	0.000184393	0.000997882	0.00232032	5.78539	5.7035	5.55176	5.43896	5.36274
2.92	5.42e-07	6.45e-06	0.000183218	0.000992975	0.00231075	5.78041	5.69853	5.54679	5.43399	5.35776
2.93	5.37e-07	6.39e-06	0.000182063	0.000988147	0.00230132	5.77543	5.69355	5.54181	5.42901	5.35278
2.94	5.31e-07	6.33e-06	0.000180928	0.000983397	0.00229204	5.77045	5.68857	5.53684	5.42404	5.3478
2.95	5.25e-07	6.28e-06	0.000179813	0.000978723	0.0022829	5.76548	5.68359	5.53186	5.41907	5.34282
2.96	5.2e-07	6.22e-06	0.000178718	0.000974125	0.0022739	5.7605	5.67861	5.52689	5.4141	5.33784
2.97	5.14e-07	6.17e-06	0.000177641	0.000969601	0.00226504	5.75552	5.67363	5.52191	5.40913	5.33286
2.98	5.09e-07	6.12e-06	0.000176584	0.000965148	0.00225632	5.75054	5.66865	5.51694	5.40416	5.32788
2.99	5.04e-07	6.07e-06	0.000175545	0.000960767	0.00224772	5.74556	5.66367	5.51196	5.39918	5.32291
3	4.99e-07	6.02e-06	0.000174523	0.000956455	0.00223926	5.74058	5.65869	5.50699	5.39421	5.31793
3.01	4.94e-07	5.97e-06	0.000173519	0.000952212	0.00223093	5.7356	5.65371	5.50201	5.38924	5.31295
3.02	4.89e-07	5.92e-06	0.000172533	0.000948035	0.00222272	5.73062	5.64873	5.49704	5.38427	5.30797
3.03	4.85e-07	5.87e-06	0.000171563	0.000943924	0.00221463	5.72564	5.64376	5.49206	5.3793	5.30299
3.04	4.8e-07	5.83e-06	0.000170609	0.000939878	0.00220667	5.72066	5.63878	5.48709	5.37433	5.29801
3.05	4.75e-07	5.78e-06	0.000169672	0.000935894	0.00219882	5.71568	5.6338	5.48211	5.36935	5.29303
3.06	4.71e-07	5.74e-06	0.00016875	0.000931973	0.00219109	5.7107	5.62882	5.47713	5.36438	5.28805
3.07	4.67e-07	5.69e-06	0.000167844	0.000928112	0.00218348	5.70572	5.62384	5.47216	5.35941	5.28307
3.08	4.62e-07	5.65e-06	0.000166953	0.000924312	0.00217598	5.70074	5.61886	5.46718	5.35444	5.27809
3.09	4.58e-07	5.61e-06	0.000166076	0.00092057	0.00216859	5.69576	5.61388	5.46221	5.34947	5.27311
3.1	4.54e-07	5.57e-06	0.000165215	0.000916885	0.00216131	5.69078	5.6089	5.45723	5.34449	5.26813
3.11	4.5e-07	5.53e-06	0.000164367	0.000913257	0.00215414	5.68581	5.60392	5.45226	5.33952	5.26315
3.12	4.46e-07	5.49e-06	0.000163534	0.000909685	0.00214707	5.68083	5.59894	5.44728	5.33455	5.25817
3.13	4.43e-07	5.45e-06	0.000162714	0.000906167	0.00214011	5.67585	5.59396	5.44231	5.32958	5.25319
3.14	4.39e-07	5.41e-06	0.000161907	0.000902702	0.00213324	5.67087	5.58899	5.43733	5.32461	5.24821
3.15	4.35e-07	5.37e-06	0.000161114	0.00089929	0.00212648	5.66589	5.58401	5.43236	5.31963	5.24324
3.16	4.31e-07	5.33e-06	0.000160334	0.00089593	0.00211982	5.66091	5.57903	5.42738	5.31466	5.23826
3.17	4.28e-07	5.3e-06	0.000159566	0.00089262	0.00211325	5.65593	5.57405	5.4224	5.30969	5.23328
3.18	4.24e-07	5.26e-06	0.00015881	0.00088936	0.00210678	5.65095	5.56907	5.41743	5.30472	5.2283
3.19	4.21e-07	5.23e-06	0.000158067	0.000886149	0.0021004	5.64597	5.56409	5.41245	5.29974	5.22332
3.2	4.18e-07	5.19e-06	0.000157336	0.000882986	0.00209411	5.64099	5.55911	5.40748	5.29477	5.21834
3.21	4.14e-07	5.16e-06	0.000156616	0.00087987	0.00208791	5.63601	5.55413	5.4025	5.2898	5.21336
3.22	4.11e-07	5.13e-06	0.000155908	0.000876801	0.0020818	5.63103	5.54915	5.39753	5.28483	5.20838
3.23	4.08e-07	5.09e-06	0.000155211	0.000873777	0.00207578	5.62605	5.54417	5.39255	5.27985	5.2034
3.24	4.05e-07	5.06e-06	0.000154525	0.000870798	0.00206985	5.62107	5.53919	5.38758	5.27488	5.19842
3.25	4.02e-07	5.03e-06	0.000153849	0.000867862	0.002064	5.61609	5.53422	5.3826	5.26991	5.19344
3.26	3.99e-07	5e-06	0.000153185	0.00086497	0.00205823	5.61112	5.52924	5.37762	5.26494	5.18846
3.27	3.96e-07	4.97e-06	0.000152531	0.000862121	0.00205254	5.60614	5.52426	5.37265	5.25996	5.18348
3.28	3.93e-07	4.94e-06	0.000151887	0.000859313	0.00204694	5.60116	5.51928	5.36767	5.25499	5.1785
3.29	3.9e-07	4.91e-06	0.000151253	0.000856546	0.00204141	5.59618	5.5143	5.3627	5.25002	5.17352
3.3	3.88e-07	4.88e-06	0.000150629	0.000853819	0.00203596	5.5912	5.50932	5.35772	5.24505	5.16854
3.31	3.85e-07	4.85e-06	0.000150014	0.000851132	0.00203059	5.58622	5.50434	5.35274	5.24007	5.16356
3.32	3.82e-07	4.83e-06	0.000149409	0.000848484	0.00202529	5.58124	5.49936	5.34777	5.2351	5.15859
3.33	3.8e-07	4.8e-06	0.000148814	0.000845874	0.00202007	5.57626	5.49438	5.34279	5.23013	5.15361
3.34	3.77e-07	4.77e-06	0.000148227	0.000843302	0.00201492	5.57128	5.4894	5.33782	5.22516	5.14863
3.35	3.75e-07	4.75e-06	0.00014765	0.000840767	0.00200984	5.5663	5.48442	5.33284	5.22018	5.14365
3.36	3.72e-07	4.72e-06	0.000147081	0.000838268	0.00200483	5.56132	5.47945	5.32787	5.21521	5.13867
3.37	3.7e-07	4.69e-06	0.000146521	0.000835806	0.00199989	5.55634	5.47447	5.32289	5.21024	5.13369
3.38	3.67e-07	4.67e-06	0.000145969	0.000833378	0.00199503	5.55136	5.46949	5.31791	5.20527	5.12871
3.39	3.65e-07	4.64e-06	0.000145426	0.000830985	0.00199022	5.54638	5.46451	5.31294	5.20029	5.12373
3.4	3.63e-07	4.62e-06	0.000144891	0.000828626	0.00198548	5.5414	5.45953	5.30796	5.19532	5.11875
3.41	3.6e-07	4.6e-06	0.000144364	0.0008263	0.00198081	5.53642	5.45455	5.30299	5.19035	5.11377
3.42	3.58e-07	4.57e-06	0.000143844	0.000824007	0.00197621	5.53145	5.44957	5.29801	5.18537	5.10879
3.43	3.56e-07	4.55e-06	0.000143333	0.000821747	0.00197166	5.52647	5.44459	5.29303	5.1804	5.10381
3.44	3.54e-07	4.53e-06	0.000142829	0.000819519	0.00196718	5.52149	5.43961	5.28806	5.17543	5.09883
3.45	3.52e-07	4.5e-06	0.000142333	0.000817322	0.00196276	5.51651	5.43463	5.28308	5.17046	5.09385
3.46	3.5e-07	4.48e-06	0.000141844	0.000815156	0.0019584	5.51153	5.42965	5.27811	5.16548	5.08887
3.47	3.48e-07	4.46e-06	0.000141362	0.00081302	0.0019541	5.50655	5.42467	5.27313	5.16051	5.08389
3.48	3.46e-07	4.44e-06	0.000140888	0.000810914	0.00194985	5.50157	5.4197	5.26815	5.15554	5.07892
3.49	3.44e-07	4.42e-06	0.00014042	0.000808837	0.00194567	5.49659	5.41472	5.26318	5.15056	5.07394
3.5	3.42e-07	4.4e-06	0.000139959	0.000806789	0.00194154	5.49161	5.40974	5.2582	5.14559	5.06896
3.51	3.4e-07	4.38e-06	0.000139505	0.00080477	0.00193746	5.48663	5.40476	5.25323	5.14062	5.06398
3.52	3.38e-07	4.36e-06	0.000139058	0.000802779	0.00193345	5.48165	5.39978	5.24825	5.13565	5.059
3.53	3.36e-07	4.34e-06	0.000138617	0.000800815	0.00192948	5.47667	5.3948	5.24327	5.13067	5.05402
3.54	3.34e-07	4.32e-06	0.000138183	0.000798878	0.00192557	5.47169	5.38982	5.2383	5.1257	5.04904
3.55	3.33e-07	4.3e-06	0.000137755	0.000796968	0.00192171	5.46671	5.38484	5.23332	5.12073	5.04406
3.56	3.31e-07	4.28e-06	0.000137333	0.000795084	0.0019179	5.46173	5.37986	5.22835	5.11575	5.03908
3.57	3.29e-07	4.26e-06	0.000136917	0.000793226	0.00191415	5.45675	5.37488	5.22337	5.11078	5.0341
3.58	3.27e-07	4.25e-06	0.000136507	0.000791394	0.00191044	5.45178	5.3699	5.21839	5.10581	5.02912
3.59	3.26e-07	4.23e-06	0.000136103	0.000789587	0.00190679	5.4468	5.36492	5.21342	5.10083	5.02414
3.6	3.24e-07	4.21e-06	0.000135705	0.000787804	0.00190318	5.44182	5.35995	5.20844	5.09586	5.01916
3.61	3.23e-07	4.19e-06	0.000135312	0.000786045	0.00189962	5.43684	5.35497	5.20347	5.09089	5.01418
3.62	3.21e-07	4.18e-06	0.000134925	0.000784311	0.0018961	5.43186	5.34999	5.19849	5.08592	5.0092
3.63	3.19e-07	4.16e-06	0.000134544	0.0007826	0.00189264	5.42688	5.34501	5.19351	5.08094	5.00422
3.64	3.18e-07	4.14e-06	0.000134168	0.000780912	0.00188922	5.4219	5.34003	5.18854	5.07597	4.99924
3.65	3.16e-07	4.13e-06	0.000133797	0.000779247	0.00188584	5.41692	5.33505	5.18356	5.071	4.99427
3.66	3.15e-07	4.11e-06	0.000133431	0.000777604	0.00188251	5.41194	5.33007	5.17858	5.06602	4.98929
3.67	3.13e-07	4.09e-06	0.000133071	0.000775984	0.00187922	5.40696	5.32509	5.17361	5.06105	4.98431
3.68	3.12e-07	4.08e-06	0.000132716	0.000774385	0.00187598	5.40198	5.32011	5.16863	5.05608	4.97933
3.69	3.11e-07	4.06e-06	0.000132366	0.000772808	0.00187277	5.397	5.31513	5.16366	5.0511	4.97435
3.7	3.09e-07	4.05e-06	0.00013202	0.000771252	0.00186961	5.39202	5.31015	5.15868	5.04613	4.96937
3.71	3.08e-07	4.03e-06	0.00013168	0.000769717	0.0018665	5.38704	5.30517	5.1537	5.04116	4.96439
3.72	3.07e-07	4.02e-06	0.000131344	0.000768202	0.00186342	5.38206	5.3002	5.14873	5.03618	4.95941
3.73	3.05e-07	4.01e-06	0.000131013	0.000766707	0.00186038	5.37708	5.29522	5.14375	5.03121	4.95443
3.74	3.04e-07	3.99e-06	0.000130686	0.000765233	0.00185738	5.37211	5.29024	5.13877	5.02624	4.94945
3.75	3.03e-07	3.98e-06	0.000130364	0.000763778	0.00185442	5.36713	5.28526	5.1338	5.02126	4.94447
3.76	3.01e-07	3.96e-06	0.000130047	0.000762342	0.0018515	5.36215	5.28028	5.12882	5.01629	4.93949
3.77	3e-07	3.95e-06	0.000129733	0.000760925	0.00184862	5.35717	5.2753	5.12385	5.01132	4.93451
3.78	2.99e-07	3.94e-06	0.000129425	0.000759527	0.00184577	5.35219	5.27032	5.11887	5.00634	4.92953
3.79	2.98e-07	3.92e-06	0.00012912	0.000758148	0.00184296	5.34721	5.26534	5.11389	5.00137	4.92455
3.8	2.97e-07	3.91e-06	0.00012882	0.000756786	0.00184019	5.34223	5.26036	5.10892	4.9964	4.91957
3.81	2.95e-07	3.9e-06	0.000128523	0.000755443	0.00183745	5.33725	5.25538	5.10394	4.99142	4.9146
3.82	2.94e-07	3.88e-06	0.000128231	0.000754117	0.00183475	5.33227	5.2504	5.09896	4.98645	4.90962
3.83	2.93e-07	3.87e-06	0.000127943	0.000752809	0.00183208	5.32729	5.24542	5.09399	4.98148	4.90464
3.84	2.92e-07	3.86e-06	0.000127658	0.000751517	0.00182945	5.32231	5.24045	5.08901	4.9765	4.89966
3.85	2.91e-07	3.85e-06	0.000127378	0.000750243	0.00182685	5.31733	5.23547	5.08404	4.97153	4.89468
3.86	2.9e-07	3.84e-06	0.000127101	0.000748985	0.00182429	5.31235	5.23049	5.07906	4.96656	4.8897
3.87	2.89e-07	3.82e-06	0.000126828	0.000747744	0.00182175	5.30737	5.22551	5.07408	4.96158	4.88472
3.88	2.88e-07	3.81e-06	0.000126559	0.000746519	0.00181925	5.30239	5.22053	5.06911	4.95661	4.87974
3.89	2.87e-07	3.8e-06	0.000126293	0.00074531	0.00181678	5.29741	5.21555	5.06413	4.95164	4.87476
3.9	2.86e-07	3.79e-06	0.000126031	0.000744116	0.00181435	5.29244	5.21057	5.05915	4.94666	4.86978
3.91	2.85e-07	3.78e-06	0.000125773	0.000742938	0.00181194	5.28746	5.20559	5.05418	4.94169	4.8648
3.92	2.84e-07	3.77e-06	0.000125518	0.000741775	0.00180956	5.28248	5.20061	5.0492	4.93672	4.85982
3.93	2.83e-07	3.76e-06	0.000125266	0.000740628	0.00180722	5.2775	5.19563	5.04422	4.93174	4.85484
3.94	2.82e-07	3.75e-06	0.000125018	0.000739495	0.0018049	5.27252	5.19065	5.03925	4.92677	4.84986
3.95	2.81e-07	3.74e-06	0.000124773	0.000738376	0.00180262	5.26754	5.18567	5.03427	4.9218	4.84488
3.96	2.8e-07	3.73e-06	0.000124531	0.000737272	0.00180036	5.26256	5.1807	5.02929	4.91682	4.8399
3.97	2.79e-07	3.72e-06	0.000124293	0.000736183	0.00179813	5.25758	5.17572	5.02432	4.91185	4.83492
3.98	2.78e-07	3.71e-06	0.000124058	0.000735107	0.00179593	5.2526	5.17074	5.01934	4.90687	4.82995
3.99	2.77e-07	3.7e-06	0.000123825	0.000734045	0.00179376	5.24762	5.16576	5.01437	4.9019	4.82497
4	2.76e-07	3.69e-06	0.000123596	0.000732997	0.00179161	5.24264	5.16078	5.00939	4.89693	4.81999
4.01	2.75e-07	3.68e-06	0.00012337	0.000731962	0.00178949	5.23766	5.1558	5.00441	4.89195	4.81501
4.02	2.75e-07	3.67e-06	0.000123147	0.00073094	0.0017874	5.23268	5.15082	4.99944	4.88698	4.81003
4.03	2.74e-07	3.66e-06	0.000122927	0.000729932	0.00178533	5.2277	5.14584	4.99446	4.88201	4.80505
4.04	2.73e-07	3.65e-06	0.00012271	0.000728936	0.00178329	5.22272	5.14086	4.98948	4.87703	4.80007
4.05	2.72e-07	3.64e-06	0.000122495	0.000727953	0.00178128	5.21775	5.13588	4.98451	4.87206	4.79509
4.06	2.71e-07	3.63e-06	0.000122284	0.000726982	0.00177929	5.21277	5.1309	4.97953	4.86709	4.79011
4.07	2.7e-07	3.62e-06	0.000122075	0.000726024	0.00177732	5.20779	5.12592	4.97455	4.86211	4.78513
4.08	2.7e-07	3.61e-06	0.000121869	0.000725078	0.00177539	5.20281	5.12095	4.96958	4.85714	4.78015
4.09	2.69e-07	3.61e-06	0.000121665	0.000724144	0.00177347	5.19783	5.11597	4.9646	4.85217	4.77517
4.1	2.68e-07	3.6e-06	0.000121465	0.000723222	0.00177158	5.19285	5.11099	4.95962	4.84719	4.77019
4.11	2.67e-07	3.59e-06	0.000121267	0.000722311	0.00176971	5.18787	5.10601	4.95465	4.84222	4.76521
4.12	2.67e-07	3.58e-06	0.000121071	0.000721412	0.00176786	5.18289	5.10103	4.94967	4.83724	4.76023
4.13	2.66e-07	3.57e-06	0.000120878	0.000720525	0.00176604	5.17791	5.09605	4.9447	4.83227	4.75525
4.14	2.65e-07	3.56e-06	0.000120688	0.000719648	0.00176424	5.17293	5.09107	4.93972	4.8273	4.75028
4.15	2.64e-07	3.56e-06	0.0001205	0.000718782	0.00176247	5.16795	5.08609	4.93474	4.82232	4.7453
4.16	2.64e-07	3.55e-06	0.000120314	0.000717928	0.00176071	5.16297	5.08111	4.92977	4.81735	4.74032
4.17	2.63e-07	3.54e-06	0.000120131	0.000717084	0.00175898	5.15799	5.07613	4.92479	4.81238	4.73534
4.18	2.62e-07	3.53e-06	0.00011995	0.000716251	0.00175727	5.15301	5.07115	4.91981	4.8074	4.73036
4.19	2.62e-07	3.53e-06	0.000119771	0.000715428	0.00175558	5.14803	5.06617	4.91484	4.80243	4.72538
4.2	2.61e-07	3.52e-06	0.000119595	0.000714615	0.00175391	5.14305	5.06119	4.90986	4.79746	4.7204
4.21	2.6e-07	3.51e-06	0.000119421	0.000713813	0.00175226	5.13808	5.05622	4.90488	4.79248	4.71542
4.22	2.6e-07	3.5e-06	0.000119249	0.000713021	0.00175063	5.1331	5.05124	4.89991	4.78751	4.71044
4.23	2.59e-07	3.5e-06	0.00011908	0.000712238	0.00174902	5.12812	5.04626	4.89493	4.78253	4.70546
4.24	2.59e-07	3.49e-06	0.000118913	0.000711465	0.00174743	5.12314	5.04128	4.88995	4.77756	4.70048
4.25	2.58e-07	3.48e-06	0.000118747	0.000710702	0.00174586	5.11816	5.0363	4.88498	4.77259	4.6955
4.26	2.57e-07	3.48e-06	0.000118584	0.000709949	0.00174431	5.11318	5.03132	4.88	4.76761	4.69052
4.27	2.57e-07	3.47e-06	0.000118423	0.000709205	0.00174278	5.1082	5.02634	4.87502	4.76264	4.68554
4.28	2.56e-07	3.46e-06	0.000118264	0.00070847	0.00174127	5.10322	5.02136	4.87005	4.75767	4.68056
4.29	2.56e-07	3.46e-06	0.000118107	0.000707744	0.00173977	5.09824	5.01638	4.86507	4.75269	4.67558
4.3	2.55e-07	3.45e-06	0.000117952	0.000707027	0.0017383	5.09326	5.0114	4.86009	4.74772	4.6706
4.31	2.54e-07	3.44e-06	0.000117799	0.000706319	0.00173684	5.08828	5.00642	4.85512	4.74274	4.66563
4.32	2.54e-07	3.44e-06	0.000117648	0.00070562	0.0017354	5.0833	5.00144	4.85014	4.73777	4.66065
4.33	2.53e-07	3.43e-06	0.000117499	0.000704929	0.00173398	5.07832	4.99647	4.84516	4.7328	4.65567
4.34	2.53e-07	3.43e-06	0.000117352	0.000704247	0.00173258	5.07334	4.99149	4.84019	4.72782	4.65069
4.35	2.52e-07	3.42e-06	0.000117207	0.000703574	0.00173119	5.06836	4.98651	4.83521	4.72285	4.64571
4.36	2.52e-07	3.41e-06	0.000117063	0.000702908	0.00172982	5.06338	4.98153	4.83023	4.71788	4.64073
4.37	2.51e-07	3.41e-06	0.000116921	0.000702251	0.00172846	5.05841	4.97655	4.82526	4.7129	4.63575
4.38	2.51e-07	3.4e-06	0.000116781	0.000701602	0.00172713	5.05343	4.97157	4.82028	4.70793	4.63077
4.39	2.5e-07	3.4e-06	0.000116643	0.000700961	0.0017258	5.04845	4.96659	4.8153	4.70295	4.62579
4.4	2.5e-07	3.39e-06	0.000116507	0.000700328	0.0017245	5.04347	4.96161	4.81033	4.69798	4.62081
4.41	2.49e-07	3.39e-06	0.000116372	0.000699703	0.00172321	5.03849	4.95663	4.80535	4.69301	4.61583
4.42	2.49e-07	3.38e-06	0.000116239	0.000699085	0.00172194	5.03351	4.95165	4.80038	4.68803	4.61085
4.43	2.48e-07	3.37e-06	0.000116107	0.000698475	0.00172068	5.02853	4.94667	4.7954	4.68306	4.60587
4.44	2.48e-07	3.37e-06	0.000115978	0.000697872	0.00171944	5.02355	4.94169	4.79042	4.67809	4.60089
4.45	2.47e-07	3.36e-06	0.00011585	0.000697277	0.00171821	5.01857	4.93671	4.78545	4.67311	4.59591
4.46	2.47e-07	3.36e-06	0.000115723	0.000696689	0.001717	5.01359	4.93174	4.78047	4.66814	4.59093
4.47	2.46e-07	3.35e-06	0.000115598	0.000696108	0.0017158	5.00861	4.92676	4.77549	4.66316	4.58596
4.48	2.46e-07	3.35e-06	0.000115475	0.000695534	0.00171461	5.00363	4.92178	4.77052	4.65819	4.58098
4.49	2.45e-07	3.34e-06	0.000115353	0.000694968	0.00171344	4.99865	4.9168	4.76554	4.65322	4.576
4.5	2.45e-07	3.34e-06	0.000115232	0.000694408	0.00171229	4.99367	4.91182	4.76056	4.64824	4.57102
4.51	2.45e-07	3.33e-06	0.000115114	0.000693855	0.00171115	4.98869	4.90684	4.75559	4.64327	4.56604
4.52	2.44e-07	3.33e-06	0.000114996	0.000693309	0.00171002	4.98371	4.90186	4.75061	4.63829	4.56106
4.53	2.44e-07	3.32e-06	0.00011488	0.000692769	0.0017089	4.97874	4.89688	4.74563	4.63332	4.55608
4.54	2.43e-07	3.32e-06	0.000114766	0.000692236	0.0017078	4.97376	4.8919	4.74066	4.62835	4.5511
4.55	2.43e-07	3.32e-06	0.000114653	0.000691709	0.00170672	4.96878	4.88692	4.73568	4.62337	4.54612
4.56	2.43e-07	3.31e-06	0.000114541	0.000691189	0.00170564	4.9638	4.88194	4.7307	4.6184	4.54114
4.57	2.42e-07	3.31e-06	0.000114431	0.000690675	0.00170458	4.95882	4.87696	4.72573	4.61343	4.53616
4.58	2.42e-07	3.3e-06	0.000114322	0.000690168	0.00170353	4.95384	4.87199	4.72075	4.60845	4.53118
4.59	2.41e-07	3.3e-06	0.000114214	0.000689666	0.0017025	4.94886	4.86701	4.71577	4.60348	4.5262
4.6	2.41e-07	3.29e-06	0.000114108	0.000689171	0.00170147	4.94388	4.86203	4.7108	4.5985	4.52122
4.61	2.41e-07	3.29e-06	0.000114003	0.000688681	0.00170046	4.9389	4.85705	4.70582	4.59353	4.51624
4.62	2.4e-07	3.28e-06	0.0001139	0.000688198	0.00169946	4.93392	4.85207	4.70084	4.58856	4.51126
4.63	2.4e-07	3.28e-06	0.000113797	0.00068772	0.00169848	4.92894	4.84709	4.69587	4.58358	4.50628
4.64	2.39e-07	3.28e-06	0.000113696	0.000687248	0.0016975	4.92396	4.84211	4.69089	4.57861	4.50131
4.65	2.39e-07	3.27e-06	0.000113596	0.000686782	0.00169654	4.91898	4.83713	4.68591	4.57363	4.49633
4.66	2.39e-07	3.27e-06	0.000113497	0.000686322	0.00169558	4.914	4.83215	4.68094	4.56866	4.49135
4.67	2.38e-07	3.26e-06	0.0001134	0.000685867	0.00169464	4.90902	4.82717	4.67596	4.56369	4.48637
4.68	2.38e-07	3.26e-06	0.000113304	0.000685417	0.00169371	4.90404	4.82219	4.67098	4.55871	4.48139
4.69	2.38e-07	3.26e-06	0.000113209	0.000684973	0.00169279	4.89907	4.81721	4.66601	4.55374	4.47641
4.7	2.37e-07	3.25e-06	0.000113115	0.000684534	0.00169189	4.89409	4.81223	4.66103	4.54876	4.47143
4.71	2.37e-07	3.25e-06	0.000113022	0.000684101	0.00169099	4.88911	4.80726	4.65605	4.54379	4.46645
4.72	2.37e-07	3.24e-06	0.00011293	0.000683672	0.0016901	4.88413	4.80228	4.65108	4.53882	4.46147
4.73	2.36e-07	3.24e-06	0.00011284	0.000683249	0.00168923	4.87915	4.7973	4.6461	4.53384	4.45649
4.74	2.36e-07	3.24e-06	0.00011275	0.000682831	0.00168836	4.87417	4.79232	4.64112	4.52887	4.45151
4.75	2.36e-07	3.23e-06	0.000112662	0.000682418	0.00168751	4.86919	4.78734	4.63615	4.5239	4.44653
4.76	2.35e-07	3.23e-06	0.000112575	0.00068201	0.00168666	4.86421	4.78236	4.63117	4.51892	4.44155
4.77	2.35e-07	3.23e-06	0.000112489	0.000681607	0.00168583	4.85923	4.77738	4.62619	4.51395	4.43657
4.78	2.35e-07	3.22e-06	0.000112404	0.000681208	0.00168501	4.85425	4.7724	4.62122	4.50897	4.43159
4.79	2.35e-07	3.22e-06	0.000112319	0.000680814	0.00168419	4.84927	4.76742	4.61624	4.504	4.42661
4.8	2.34e-07	3.22e-06	0.000112236	0.000680426	0.00168339	4.84429	4.76244	4.61126	4.49903	4.42164
4.81	2.34e-07	3.21e-06	0.000112154	0.000680041	0.00168259	4.83931	4.75746	4.60629	4.49405	4.41666
4.82	2.34e-07	3.21e-06	0.000112073	0.000679662	0.0016818	4.83433	4.75248	4.60131	4.48908	4.41168
4.83	2.33e-07	3.21e-06	0.000111993	0.000679286	0.00168103	4.82935	4.7475	4.59633	4.4841	4.4067
4.84	2.33e-07	3.2e-06	0.000111914	0.000678916	0.00168026	4.82437	4.74253	4.59136	4.47913	4.40172
4.85	2.33e-07	3.2e-06	0.000111836	0.000678549	0.0016795	4.8194	4.73755	4.58638	4.47416	4.39674
4.86	2.33e-07	3.2e-06	0.000111758	0.000678187	0.00167875	4.81442	4.73257	4.5814	4.46918	4.39176
4.87	2.32e-07	3.19e-06	0.000111682	0.00067783	0.00167801	4.80944	4.72759	4.57643	4.46421	4.38678
4.88	2.32e-07	3.19e-06	0.000111607	0.000677477	0.00167728	4.80446	4.72261	4.57145	4.45923	4.3818
4.89	2.32e-07	3.19e-06	0.000111532	0.000677127	0.00167656	4.79948	4.71763	4.56647	4.45426	4.37682
4.9	2.31e-07	3.18e-06	0.000111459	0.000676782	0.00167584	4.7945	4.71265	4.56149	4.44929	4.37184
4.91	2.31e-07	3.18e-06	0.000111386	0.000676442	0.00167513	4.78952	4.70767	4.55652	4.44431	4.36686
4.92	2.31e-07	3.18e-06	0.000111314	0.000676105	0.00167444	4.78454	4.70269	4.55154	4.43934	4.36188
4.93	2.31e-07	3.18e-06	0.000111243	0.000675772	0.00167375	4.77956	4.69771	4.54656	4.43436	4.3569
4.94	2.3e-07	3.17e-06	0.000111173	0.000675443	0.00167307	4.77458	4.69273	4.54159	4.42939	4.35192
4.95	2.3e-07	3.17e-06	0.000111104	0.000675118	0.00167239	4.7696	4.68775	4.53661	4.42442	4.34694
4.96	2.3e-07	3.17e-06	0.000111036	0.000674797	0.00167173	4.76462	4.68278	4.53163	4.41944	4.34196
4.97	2.3e-07	3.17e-06	0.000110968	0.00067448	0.00167107	4.75964	4.6778	4.52666	4.41447	4.33699
4.98	2.29e-07	3.16e-06	0.000110901	0.000674166	0.00167042	4.75466	4.67282	4.52168	4.40949	4.33201
4.99	2.29e-07	3.16e-06	0.000110835	0.000673856	0.00166978	4.74968	4.66784	4.5167	4.40452	4.32703
5	2.29e-07	3.16e-06	0.00011077	0.00067355	0.00166914	4.7447	4.66286	4.51173	4.39955	4.32205
5.01	2.29e-07	3.15e-06	0.000110706	0.000673248	0.00166852	4.73973	4.65788	4.50675	4.39457	4.31707
5.02	2.29e-07	3.15e-06	0.000110642	0.000672949	0.0016679	4.73475	4.6529	4.50177	4.3896	4.31209
5.03	2.28e-07	3.15e-06	0.000110579	0.000672653	0.00166728	4.72977	4.64792	4.4968	4.38462	4.30711
5.04	2.28e-07	3.15e-06	0.000110517	0.000672361	0.00166668	4.72479	4.64294	4.49182	4.37965	4.30213
5.05	2.28e-07	3.14e-06	0.000110455	0.000672073	0.00166608	4.71981	4.63796	4.48684	4.37468	4.29715
5.06	2.28e-07	3.14e-06	0.000110395	0.000671788	0.00166549	4.71483	4.63298	4.48187	4.3697	4.29217
5.07	2.27e-07	3.14e-06	0.000110335	0.000671506	0.0016649	4.70985	4.628	4.47689	4.36473	4.28719
5.08	2.27e-07	3.14e-06	0.000110276	0.000671228	0.00166433	4.70487	4.62302	4.47191	4.35975	4.28221
5.09	2.27e-07	3.13e-06	0.000110217	0.000670953	0.00166376	4.69989	4.61805	4.46694	4.35478	4.27723
5.1	2.27e-07	3.13e-06	0.000110159	0.000670681	0.00166319	4.69491	4.61307	4.46196	4.34981	4.27225
5.11	2.27e-07	3.13e-06	0.000110102	0.000670412	0.00166263	4.68993	4.60809	4.45698	4.34483	4.26727
5.12	2.26e-07	3.13e-06	0.000110046	0.000670147	0.00166208	4.68495	4.60311	4.45201	4.33986	4.26229
5.13	2.26e-07	3.13e-06	0.00010999	0.000669884	0.00166154	4.67997	4.59813	4.44703	4.33488	4.25732
5.14	2.26e-07	3.12e-06	0.000109935	0.000669625	0.001661	4.67499	4.59315	4.44205	4.32991	4.25234
5.15	2.26e-07	3.12e-06	0.00010988	0.000669369	0.00166047	4.67001	4.58817	4.43708	4.32494	4.24736
5.16	2.26e-07	3.12e-06	0.000109827	0.000669116	0.00165995	4.66503	4.58319	4.4321	4.31996	4.24238
5.17	2.25e-07	3.12e-06	0.000109773	0.000668866	0.00165943	4.66006	4.57821	4.42712	4.31499	4.2374
5.18	2.25e-07	3.11e-06	0.000109721	0.000668618	0.00165891	4.65508	4.57323	4.42215	4.31001	4.23242
5.19	2.25e-07	3.11e-06	0.000109669	0.000668374	0.00165841	4.6501	4.56825	4.41717	4.30504	4.22744
5.2	2.25e-07	3.11e-06	0.000109618	0.000668132	0.00165791	4.64512	4.56327	4.41219	4.30006	4.22246
5.21	2.25e-07	3.11e-06	0.000109567	0.000667894	0.00165741	4.64014	4.55829	4.40722	4.29509	4.21748
5.22	2.25e-07	3.11e-06	0.000109517	0.000667658	0.00165692	4.63516	4.55332	4.40224	4.29012	4.2125
5.23	2.24e-07	3.1e-06	0.000109467	0.000667425	0.00165644	4.63018	4.54834	4.39726	4.28514	4.20752
5.24	2.24e-07	3.1e-06	0.000109419	0.000667194	0.00165596	4.6252	4.54336	4.39229	4.28017	4.20254
5.25	2.24e-07	3.1e-06	0.00010937	0.000666967	0.00165549	4.62022	4.53838	4.38731	4.27519	4.19756
5.26	2.24e-07	3.1e-06	0.000109322	0.000666742	0.00165502	4.61524	4.5334	4.38233	4.27022	4.19258
5.27	2.24e-07	3.1e-06	0.000109275	0.000666519	0.00165456	4.61026	4.52842	4.37736	4.26525	4.1876
5.28	2.24e-07	3.1e-06	0.000109229	0.0006663	0.0016541	4.60528	4.52344	4.37238	4.26027	4.18262
5.29	2.23e-07	3.09e-06	0.000109183	0.000666083	0.00165365	4.6003	4.51846	4.3674	4.2553	4.17764
5.3	2.23e-07	3.09e-06	0.000109137	0.000665868	0.00165321	4.59532	4.51348	4.36242	4.25032	4.17267
5.31	2.23e-07	3.09e-06	0.000109092	0.000665656	0.00165276	4.59034	4.5085	4.35745	4.24535	4.16769
5.32	2.23e-07	3.09e-06	0.000109048	0.000665446	0.00165233	4.58536	4.50352	4.35247	4.24038	4.16271
5.33	2.23e-07	3.09e-06	0.000109004	0.000665239	0.0016519	4.58039	4.49854	4.34749	4.2354	4.15773
5.34	2.23e-07	3.08e-06	0.00010896	0.000665034	0.00165147	4.57541	4.49356	4.34252	4.23043	4.15275
5.35	2.22e-07	3.08e-06	0.000108917	0.000664832	0.00165105	4.57043	4.48859	4.33754	4.22545	4.14777
5.36	2.22e-07	3.08e-06	0.000108875	0.000664632	0.00165064	4.56545	4.48361	4.33256	4.22048	4.14279
5.37	2.22e-07	3.08e-06	0.000108833	0.000664434	0.00165023	4.56047	4.47863	4.32759	4.21551	4.13781
5.38	2.22e-07	3.08e-06	0.000108791	0.000664239	0.00164982	4.55549	4.47365	4.32261	4.21053	4.13283
5.39	2.22e-07	3.08e-06	0.000108751	0.000664046	0.00164942	4.55051	4.46867	4.31763	4.20556	4.12785
5.4	2.22e-07	3.07e-06	0.00010871	0.000663855	0.00164902	4.54553	4.46369	4.31266	4.20058	4.12287
5.41	2.22e-07	3.07e-06	0.00010867	0.000663666	0.00164863	4.54055	4.45871	4.30768	4.19561	4.11789
5.42	2.21e-07	3.07e-06	0.000108631	0.00066348	0.00164825	4.53557	4.45373	4.3027	4.19064	4.11291
5.43	2.21e-07	3.07e-06	0.000108592	0.000663296	0.00164786	4.53059	4.44875	4.29773	4.18566	4.10793
5.44	2.21e-07	3.07e-06	0.000108553	0.000663114	0.00164748	4.52561	4.44377	4.29275	4.18069	4.10295
5.45	2.21e-07	3.07e-06	0.000108515	0.000662934	0.00164711	4.52063	4.43879	4.28777	4.17571	4.09797
5.46	2.21e-07	3.06e-06	0.000108477	0.000662756	0.00164674	4.51565	4.43381	4.2828	4.17074	4.093
5.47	2.21e-07	3.06e-06	0.00010844	0.00066258	0.00164638	4.51067	4.42883	4.27782	4.16576	4.08802
5.48	2.21e-07	3.06e-06	0.000108403	0.000662406	0.00164602	4.50569	4.42386	4.27284	4.16079	4.08304
5.49	2.21e-07	3.06e-06	0.000108367	0.000662235	0.00164566	4.50072	4.41888	4.26787	4.15582	4.07806
5.5	2.2e-07	3.06e-06	0.000108331	0.000662065	0.00164531	4.49574	4.4139	4.26289	4.15084	4.07308
5.51	2.2e-07	3.06e-06	0.000108295	0.000661897	0.00164496	4.49076	4.40892	4.25791	4.14587	4.0681
5.52	2.2e-07	3.06e-06	0.00010826	0.000661732	0.00164461	4.48578	4.40394	4.25294	4.14089	4.06312
5.53	2.2e-07	3.05e-06	0.000108225	0.000661568	0.00164427	4.4808	4.39896	4.24796	4.13592	4.05814
5.54	2.2e-07	3.05e-06	0.000108191	0.000661406	0.00164394	4.47582	4.39398	4.24298	4.13095	4.05316
5.55	2.2e-07	3.05e-06	0.000108157	0.000661246	0.0016436	4.47084	4.389	4.23801	4.12597	4.04818
5.56	2.2e-07	3.05e-06	0.000108124	0.000661088	0.00164328	4.46586	4.38402	4.23303	4.121	4.0432
5.57	2.2e-07	3.05e-06	0.000108091	0.000660931	0.00164295	4.46088	4.37904	4.22805	4.11602	4.03822
5.58	2.2e-07	3.05e-06	0.000108058	0.000660777	0.00164263	4.4559	4.37406	4.22307	4.11105	4.03324
5.59	2.19e-07	3.05e-06	0.000108026	0.000660624	0.00164231	4.45092	4.36908	4.2181	4.10608	4.02826
5.6	2.19e-07	3.05e-06	0.000107994	0.000660473	0.001642	4.44594	4.3641	4.21312	4.1011	4.02328
5.61	2.19e-07	3.04e-06	0.000107962	0.000660324	0.00164169	4.44096	4.35913	4.20814	4.09613	4.0183
5.62	2.19e-07	3.04e-06	0.000107931	0.000660176	0.00164138	4.43598	4.35415	4.20317	4.09115	4.01332
5.63	2.19e-07	3.04e-06	0.0001079	0.00066003	0.00164108	4.431	4.34917	4.19819	4.08618	4.00835
5.64	2.19e-07	3.04e-06	0.00010787	0.000659886	0.00164078	4.42602	4.34419	4.19321	4.08121	4.00337
5.65	2.19e-07	3.04e-06	0.00010784	0.000659744	0.00164048	4.42105	4.33921	4.18824	4.07623	3.99839
5.66	2.19e-07	3.04e-06	0.00010781	0.000659603	0.00164019	4.41607	4.33423	4.18326	4.07126	3.99341
5.67	2.19e-07	3.04e-06	0.00010778	0.000659464	0.0016399	4.41109	4.32925	4.17828	4.06628	3.98843
5.68	2.18e-07	3.04e-06	0.000107751	0.000659327	0.00163962	4.40611	4.32427	4.17331	4.06131	3.98345
5.69	2.18e-07	3.03e-06	0.000107722	0.000659191	0.00163933	4.40113	4.31929	4.16833	4.05633	3.97847
5.7	2.18e-07	3.03e-06	0.000107694	0.000659056	0.00163905	4.39615	4.31431	4.16335	4.05136	3.97349
5.71	2.18e-07	3.03e-06	0.000107666	0.000658924	0.00163878	4.39117	4.30933	4.15838	4.04639	3.96851
5.72	2.18e-07	3.03e-06	0.000107638	0.000658792	0.0016385	4.38619	4.30435	4.1534	4.04141	3.96353
5.73	2.18e-07	3.03e-06	0.000107611	0.000658663	0.00163824	4.38121	4.29938	4.14842	4.03644	3.95855
5.74	2.18e-07	3.03e-06	0.000107584	0.000658534	0.00163797	4.37623	4.2944	4.14345	4.03146	3.95357
5.75	2.18e-07	3.03e-06	0.000107557	0.000658408	0.0016377	4.37125	4.28942	4.13847	4.02649	3.94859
5.76	2.18e-07	3.03e-06	0.00010753	0.000658282	0.00163744	4.36627	4.28444	4.13349	4.02152	3.94361
5.77	2.18e-07	3.03e-06	0.000107504	0.000658159	0.00163719	4.36129	4.27946	4.12852	4.01654	3.93863
5.78	2.17e-07	3.03e-06	0.000107478	0.000658036	0.00163693	4.35631	4.27448	4.12354	4.01157	3.93365
5.79	2.17e-07	3.02e-06	0.000107453	0.000657915	0.00163668	4.35133	4.2695	4.11856	4.00659	3.92868
5.8	2.17e-07	3.02e-06	0.000107428	0.000657796	0.00163643	4.34635	4.26452	4.11358	4.00162	3.9237
5.81	2.17e-07	3.02e-06	0.000107403	0.000657677	0.00163619	4.34138	4.25954	4.10861	3.99664	3.91872
5.82	2.17e-07	3.02e-06	0.000107378	0.000657561	0.00163594	4.3364	4.25456	4.10363	3.99167	3.91374
5.83	2.17e-07	3.02e-06	0.000107353	0.000657445	0.0016357	4.33142	4.24958	4.09865	3.9867	3.90876
5.84	2.17e-07	3.02e-06	0.000107329	0.000657331	0.00163547	4.32644	4.2446	4.09368	3.98172	3.90378
5.85	2.17e-07	3.02e-06	0.000107306	0.000657218	0.00163523	4.32146	4.23962	4.0887	3.97675	3.8988
5.86	2.17e-07	3.02e-06	0.000107282	0.000657107	0.001635	4.31648	4.23465	4.08372	3.97177	3.89382
5.87	2.17e-07	3.02e-06	0.000107259	0.000656996	0.00163477	4.3115	4.22967	4.07875	3.9668	3.88884
5.88	2.17e-07	3.02e-06	0.000107236	0.000656888	0.00163455	4.30652	4.22469	4.07377	3.96183	3.88386
5.89	2.17e-07	3.01e-06	0.000107213	0.00065678	0.00163432	4.30154	4.21971	4.06879	3.95685	3.87888
5.9	2.17e-07	3.01e-06	0.00010719	0.000656673	0.0016341	4.29656	4.21473	4.06382	3.95188	3.8739
5.91	2.16e-07	3.01e-06	0.000107168	0.000656568	0.00163388	4.29158	4.20975	4.05884	3.9469	3.86892
5.92	2.16e-07	3.01e-06	0.000107146	0.000656464	0.00163366	4.2866	4.20477	4.05386	3.94193	3.86394
5.93	2.16e-07	3.01e-06	0.000107125	0.000656361	0.00163345	4.28162	4.19979	4.04889	3.93696	3.85896
5.94	2.16e-07	3.01e-06	0.000107103	0.00065626	0.00163324	4.27664	4.19481	4.04391	3.93198	3.85398
5.95	2.16e-07	3.01e-06	0.000107082	0.000656159	0.00163303	4.27166	4.18983	4.03893	3.92701	3.849
5.96	2.16e-07	3.01e-06	0.000107061	0.00065606	0.00163282	4.26668	4.18485	4.03396	3.92203	3.84403
5.97	2.16e-07	3.01e-06	0.00010704	0.000655962	0.00163262	4.2617	4.17987	4.02898	3.91706	3.83905
5.98	2.16e-07	3.01e-06	0.00010702	0.000655865	0.00163242	4.25673	4.17489	4.024	3.91208	3.83407
5.99	2.16e-07	3.01e-06	0.000106999	0.000655769	0.00163222	4.25175	4.16992	4.01903	3.90711	3.82909
6	2.16e-07	3.01e-06	0.000106979	0.000655674	0.00163202	4.24677	4.16494	4.01405	3.90214	3.82411
6.01	2.16e-07	3e-06	0.00010696	0.000655581	0.00163183	4.24179	4.15996	4.00907	3.89716	3.81913
6.02	2.16e-07	3e-06	0.00010694	0.000655488	0.00163163	4.23681	4.15498	4.00409	3.89219	3.81415
6.03	2.16e-07	3e-06	0.000106921	0.000655396	0.00163144	4.23183	4.15	3.99912	3.88721	3.80917
6.04	2.16e-07	3e-06	0.000106902	0.000655306	0.00163126	4.22685	4.14502	3.99414	3.88224	3.80419
6.05	2.15e-07	3e-06	0.000106883	0.000655217	0.00163107	4.22187	4.14004	3.98916	3.87727	3.79921
6.06	2.15e-07	3e-06	0.000106864	0.000655128	0.00163089	4.21689	4.13506	3.98419	3.87229	3.79423
6.07	2.15e-07	3e-06	0.000106846	0.000655041	0.0016307	4.21191	4.13008	3.97921	3.86732	3.78925
6.08	2.15e-07	3e-06	0.000106827	0.000654954	0.00163052	4.20693	4.1251	3.97423	3.86234	3.78427
6.09	2.15e-07	3e-06	0.000106809	0.000654869	0.00163035	4.20195	4.12012	3.96926	3.85737	3.77929
6.1	2.15e-07	3e-06	0.000106792	0.000654785	0.00163017	4.19697	4.11514	3.96428	3.85239	3.77431
6.11	2.15e-07	3e-06	0.000106774	0.000654701	0.00163	4.19199	4.11016	3.9593	3.84742	3.76933
6.12	2.15e-07	3e-06	0.000106757	0.000654619	0.00162983	4.18701	4.10519	3.95433	3.84245	3.76436
6.13	2.15e-07	3e-06	0.000106739	0.000654537	0.00162966	4.18203	4.10021	3.94935	3.83747	3.75938
6.14	2.15e-07	3e-06	0.000106722	0.000654457	0.00162949	4.17706	4.09523	3.94437	3.8325	3.7544
6.15	2.15e-07	2.99e-06	0.000106706	0.000654377	0.00162932	4.17208	4.09025	3.9394	3.82752	3.74942
6.16	2.15e-07	2.99e-06	0.000106689	0.000654298	0.00162916	4.1671	4.08527	3.93442	3.82255	3.74444
6.17	2.15e-07	2.99e-06	0.000106673	0.00065422	0.001629	4.16212	4.08029	3.92944	3.81758	3.73946
6.18	2.15e-07	2.99e-06	0.000106656	0.000654143	0.00162884	4.15714	4.07531	3.92447	3.8126	3.73448
6.19	2.15e-07	2.99e-06	0.00010664	0.000654067	0.00162868	4.15216	4.07033	3.91949	3.80763	3.7295
6.2	2.15e-07	2.99e-06	0.000106624	0.000653992	0.00162852	4.14718	4.06535	3.91451	3.80265	3.72452
6.21	2.14e-07	2.99e-06	0.000106609	0.000653918	0.00162837	4.1422	4.06037	3.90953	3.79768	3.71954
6.22	2.14e-07	2.99e-06	0.000106593	0.000653844	0.00162821	4.13722	4.05539	3.90456	3.7927	3.71456
6.23	2.14e-07	2.99e-06	0.000106578	0.000653772	0.00162806	4.13224	4.05041	3.89958	3.78773	3.70958
6.24	2.14e-07	2.99e-06	0.000106563	0.0006537	0.00162791	4.12726	4.04543	3.8946	3.78276	3.7046
6.25	2.14e-07	2.99e-06	0.000106548	0.000653629	0.00162777	4.12228	4.04046	3.88963	3.77778	3.69962
6.26	2.14e-07	2.99e-06	0.000106533	0.000653559	0.00162762	4.1173	4.03548	3.88465	3.77281	3.69464
6.27	2.14e-07	2.99e-06	0.000106518	0.000653489	0.00162748	4.11232	4.0305	3.87967	3.76783	3.68966
6.28	2.14e-07	2.99e-06	0.000106504	0.000653421	0.00162733	4.10734	4.02552	3.8747	3.76286	3.68468
6.29	2.14e-07	2.99e-06	0.00010649	0.000653353	0.00162719	4.10236	4.02054	3.86972	3.75789	3.67971
6.3	2.14e-07	2.99e-06	0.000106476	0.000653286	0.00162705	4.09739	4.01556	3.86474	3.75291	3.67473
6.31	2.14e-07	2.98e-06	0.000106462	0.00065322	0.00162692	4.09241	4.01058	3.85977	3.74794	3.66975
6.32	2.14e-07	2.98e-06	0.000106448	0.000653155	0.00162678	4.08743	4.0056	3.85479	3.74296	3.66477
6.33	2.14e-07	2.98e-06	0.000106434	0.00065309	0.00162665	4.08245	4.00062	3.84981	3.73799	3.65979
6.34	2.14e-07	2.98e-06	0.000106421	0.000653026	0.00162651	4.07747	3.99564	3.84484	3.73301	3.65481
6.35	2.14e-07	2.98e-06	0.000106407	0.000652963	0.00162638	4.07249	3.99066	3.83986	3.72804	3.64983
6.36	2.14e-07	2.98e-06	0.000106394	0.0006529	0.00162625	4.06751	3.98568	3.83488	3.72307	3.64485
6.37	2.14e-07	2.98e-06	0.000106381	0.000652838	0.00162612	4.06253	3.9807	3.82991	3.71809	3.63987
6.38	2.14e-07	2.98e-06	0.000106368	0.000652777	0.001626	4.05755	3.97573	3.82493	3.71312	3.63489
6.39	2.14e-07	2.98e-06	0.000106356	0.000652717	0.00162587	4.05257	3.97075	3.81995	3.70814	3.62991
6.4	2.14e-07	2.98e-06	0.000106343	0.000652657	0.00162575	4.04759	3.96577	3.81497	3.70317	3.62493
6.41	2.14e-07	2.98e-06	0.000106331	0.000652598	0.00162562	4.04261	3.96079	3.81	3.6982	3.61995
6.42	2.13e-07	2.98e-06	0.000106318	0.00065254	0.0016255	4.03763	3.95581	3.80502	3.69322	3.61497
6.43	2.13e-07	2.98e-06	0.000106306	0.000652482	0.00162538	4.03265	3.95083	3.80004	3.68825	3.60999
6.44	2.13e-07	2.98e-06	0.000106294	0.000652426	0.00162526	4.02767	3.94585	3.79507	3.68327	3.60501
6.45	2.13e-07	2.98e-06	0.000106282	0.000652369	0.00162515	4.02269	3.94087	3.79009	3.6783	3.60004
6.46	2.13e-07	2.98e-06	0.000106271	0.000652314	0.00162503	4.01772	3.93589	3.78511	3.67332	3.59506
6.47	2.13e-07	2.98e-06	0.000106259	0.000652258	0.00162492	4.01274	3.93091	3.78014	3.66835	3.59008
6.48	2.13e-07	2.98e-06	0.000106247	0.000652204	0.0016248	4.00776	3.92593	3.77516	3.66338	3.5851
6.49	2.13e-07	2.98e-06	0.000106236	0.00065215	0.00162469	4.00278	3.92095	3.77018	3.6584	3.58012
6.5	2.13e-07	2.98e-06	0.000106225	0.000652097	0.00162458	3.9978	3.91597	3.76521	3.65343	3.57514
6.51	2.13e-07	2.97e-06	0.000106214	0.000652045	0.00162447	3.99282	3.911	3.76023	3.64845	3.57016
6.52	2.13e-07	2.97e-06	0.000106203	0.000651993	0.00162436	3.98784	3.90602	3.75525	3.64348	3.56518
6.53	2.13e-07	2.97e-06	0.000106192	0.000651941	0.00162426	3.98286	3.90104	3.75028	3.63851	3.5602
6.54	2.13e-07	2.97e-06	0.000106181	0.000651891	0.00162415	3.97788	3.89606	3.7453	3.63353	3.55522
6.55	2.13e-07	2.97e-06	0.000106171	0.00065184	0.00162405	3.9729	3.89108	3.74032	3.62856	3.55024
6.56	2.13e-07	2.97e-06	0.00010616	0.000651791	0.00162394	3.96792	3.8861	3.73535	3.62358	3.54526
6.57	2.13e-07	2.97e-06	0.00010615	0.000651742	0.00162384	3.96294	3.88112	3.73037	3.61861	3.54028
6.58	2.13e-07	2.97e-06	0.00010614	0.000651693	0.00162374	3.95796	3.87614	3.72539	3.61363	3.5353
6.59	2.13e-07	2.97e-06	0.00010613	0.000651645	0.00162364	3.95298	3.87116	3.72041	3.60866	3.53032
6.6	2.13e-07	2.97e-06	0.00010612	0.000651598	0.00162354	3.948	3.86618	3.71544	3.60369	3.52534
6.61	2.13e-07	2.97e-06	0.00010611	0.000651551	0.00162345	3.94302	3.8612	3.71046	3.59871	3.52036
6.62	2.13e-07	2.97e-06	0.0001061	0.000651505	0.00162335	3.93805	3.85622	3.70548	3.59374	3.51539
6.63	2.13e-07	2.97e-06	0.00010609	0.000651459	0.00162325	3.93307	3.85124	3.70051	3.58876	3.51041
6.64	2.13e-07	2.97e-06	0.000106081	0.000651414	0.00162316	3.92809	3.84627	3.69553	3.58379	3.50543
6.65	2.13e-07	2.97e-06	0.000106072	0.000651369	0.00162307	3.92311	3.84129	3.69055	3.57882	3.50045
6.66	2.13e-07	2.97e-06	0.000106062	0.000651325	0.00162297	3.91813	3.83631	3.68558	3.57384	3.49547
6.67	2.13e-07	2.97e-06	0.000106053	0.000651281	0.00162288	3.91315	3.83133	3.6806	3.56887	3.49049
6.68	2.13e-07	2.97e-06	0.000106044	0.000651238	0.00162279	3.90817	3.82635	3.67562	3.56389	3.48551
6.69	2.13e-07	2.97e-06	0.000106035	0.000651195	0.0016227	3.90319	3.82137	3.67065	3.55892	3.48053
6.7	2.12e-07	2.97e-06	0.000106026	0.000651153	0.00162262	3.89821	3.81639	3.66567	3.55394	3.47555
6.71	2.12e-07	2.97e-06	0.000106017	0.000651111	0.00162253	3.89323	3.81141	3.66069	3.54897	3.47057
6.72	2.12e-07	2.97e-06	0.000106009	0.00065107	0.00162244	3.88825	3.80643	3.65572	3.544	3.46559
6.73	2.12e-07	2.97e-06	0.000106	0.000651029	0.00162236	3.88327	3.80145	3.65074	3.53902	3.46061
6.74	2.12e-07	2.97e-06	0.000105991	0.000650989	0.00162228	3.87829	3.79647	3.64576	3.53405	3.45563
6.75	2.12e-07	2.97e-06	0.000105983	0.000650949	0.00162219	3.87331	3.79149	3.64079	3.52907	3.45065
6.76	2.12e-07	2.97e-06	0.000105975	0.00065091	0.00162211	3.86833	3.78651	3.63581	3.5241	3.44567
6.77	2.12e-07	2.97e-06	0.000105967	0.000650871	0.00162203	3.86335	3.78154	3.63083	3.51912	3.44069
6.78	2.12e-07	2.96e-06	0.000105958	0.000650832	0.00162195	3.85838	3.77656	3.62585	3.51415	3.43572
6.79	2.12e-07	2.96e-06	0.00010595	0.000650794	0.00162187	3.8534	3.77158	3.62088	3.50918	3.43074
6.8	2.12e-07	2.96e-06	0.000105943	0.000650757	0.00162179	3.84842	3.7666	3.6159	3.5042	3.42576
6.81	2.12e-07	2.96e-06	0.000105935	0.000650719	0.00162171	3.84344	3.76162	3.61092	3.49923	3.42078
6.82	2.12e-07	2.96e-06	0.000105927	0.000650683	0.00162164	3.83846	3.75664	3.60595	3.49425	3.4158
6.83	2.12e-07	2.96e-06	0.000105919	0.000650646	0.00162156	3.83348	3.75166	3.60097	3.48928	3.41082
6.84	2.12e-07	2.96e-06	0.000105912	0.00065061	0.00162149	3.8285	3.74668	3.59599	3.48431	3.40584
6.85	2.12e-07	2.96e-06	0.000105904	0.000650575	0.00162141	3.82352	3.7417	3.59102	3.47933	3.40086
6.86	2.12e-07	2.96e-06	0.000105897	0.00065054	0.00162134	3.81854	3.73672	3.58604	3.47436	3.39588
6.87	2.12e-07	2.96e-06	0.00010589	0.000650505	0.00162127	3.81356	3.73174	3.58106	3.46938	3.3909
6.88	2.12e-07	2.96e-06	0.000105882	0.000650471	0.0016212	3.80858	3.72676	3.57609	3.46441	3.38592
6.89	2.12e-07	2.96e-06	0.000105875	0.000650437	0.00162113	3.8036	3.72178	3.57111	3.45943	3.38094
6.9	2.12e-07	2.96e-06	0.000105868	0.000650403	0.00162106	3.79862	3.71681	3.56613	3.45446	3.37596
6.91	2.12e-07	2.96e-06	0.000105861	0.00065037	0.00162099	3.79364	3.71183	3.56116	3.44949	3.37098
6.92	2.12e-07	2.96e-06	0.000105854	0.000650337	0.00162092	3.78866	3.70685	3.55618	3.44451	3.366
6.93	2.12e-07	2.96e-06	0.000105847	0.000650305	0.00162085	3.78368	3.70187	3.5512	3.43954	3.36102
6.94	2.12e-07	2.96e-06	0.000105841	0.000650273	0.00162079	3.77871	3.69689	3.54623	3.43456	3.35604
6.95	2.12e-07	2.96e-06	0.000105834	0.000650241	0.00162072	3.77373	3.69191	3.54125	3.42959	3.35107
6.96	2.12e-07	2.96e-06	0.000105827	0.00065021	0.00162065	3.76875	3.68693	3.53627	3.42462	3.34609
6.97	2.12e-07	2.96e-06	0.000105821	0.000650179	0.00162059	3.76377	3.68195	3.53129	3.41964	3.34111
6.98	2.12e-07	2.96e-06	0.000105815	0.000650148	0.00162053	3.75879	3.67697	3.52632	3.41467	3.33613
6.99	2.12e-07	2.96e-06	0.000105808	0.000650118	0.00162046	3.75381	3.67199	3.52134	3.40969	3.33115
7	2.12e-07	2.96e-06	0.000105802	0.000650088	0.0016204	3.74883	3.66701	3.51636	3.40472	3.32617
7.01	2.12e-07	2.96e-06	0.000105796	0.000650059	0.00162034	3.74385	3.66203	3.51139	3.39974	3.32119
7.02	2.12e-07	2.96e-06	0.000105789	0.000650029	0.00162028	3.73887	3.65705	3.50641	3.39477	3.31621
7.03	2.12e-07	2.96e-06	0.000105783	0.000650001	0.00162022	3.73389	3.65208	3.50143	3.3898	3.31123
7.04	2.12e-07	2.96e-06	0.000105777	0.000649972	0.00162016	3.72891	3.6471	3.49646	3.38482	3.30625
7.05	2.12e-07	2.96e-06	0.000105771	0.000649944	0.0016201	3.72393	3.64212	3.49148	3.37985	3.30127
7.06	2.12e-07	2.96e-06	0.000105766	0.000649916	0.00162004	3.71895	3.63714	3.4865	3.37487	3.29629
7.07	2.12e-07	2.96e-06	0.00010576	0.000649888	0.00161999	3.71397	3.63216	3.48153	3.3699	3.29131
7.08	2.12e-07	2.96e-06	0.000105754	0.000649861	0.00161993	3.70899	3.62718	3.47655	3.36492	3.28633
7.09	2.12e-07	2.96e-06	0.000105748	0.000649834	0.00161987	3.70401	3.6222	3.47157	3.35995	3.28135
7.1	2.12e-07	2.96e-06	0.000105743	0.000649808	0.00161982	3.69904	3.61722	3.4666	3.35498	3.27637
7.11	2.12e-07	2.96e-06	0.000105737	0.000649781	0.00161976	3.69406	3.61224	3.46162	3.35	3.2714
7.12	2.11e-07	2.96e-06	0.000105732	0.000649755	0.00161971	3.68908	3.60726	3.45664	3.34503	3.26642
7.13	2.11e-07	2.96e-06	0.000105726	0.000649729	0.00161966	3.6841	3.60228	3.45166	3.34005	3.26144
7.14	2.11e-07	2.96e-06	0.000105721	0.000649704	0.0016196	3.67912	3.5973	3.44669	3.33508	3.25646
7.15	2.11e-07	2.96e-06	0.000105716	0.000649679	0.00161955	3.67414	3.59232	3.44171	3.33011	3.25148
7.16	2.11e-07	2.95e-06	0.00010571	0.000649654	0.0016195	3.66916	3.58735	3.43673	3.32513	3.2465
7.17	2.11e-07	2.95e-06	0.000105705	0.000649629	0.00161945	3.66418	3.58237	3.43176	3.32016	3.24152
7.18	2.11e-07	2.95e-06	0.0001057	0.000649605	0.0016194	3.6592	3.57739	3.42678	3.31518	3.23654
7.19	2.11e-07	2.95e-06	0.000105695	0.000649581	0.00161935	3.65422	3.57241	3.4218	3.31021	3.23156
7.2	2.11e-07	2.95e-06	0.00010569	0.000649557	0.0016193	3.64924	3.56743	3.41683	3.30523	3.22658
7.21	2.11e-07	2.95e-06	0.000105685	0.000649534	0.00161925	3.64426	3.56245	3.41185	3.30026	3.2216
7.22	2.11e-07	2.95e-06	0.00010568	0.000649511	0.0016192	3.63928	3.55747	3.40687	3.29529	3.21662
7.23	2.11e-07	2.95e-06	0.000105675	0.000649488	0.00161915	3.6343	3.55249	3.4019	3.29031	3.21164
7.24	2.11e-07	2.95e-06	0.000105671	0.000649465	0.00161911	3.62932	3.54751	3.39692	3.28534	3.20666
7.25	2.11e-07	2.95e-06	0.000105666	0.000649443	0.00161906	3.62434	3.54253	3.39194	3.28036	3.20168
7.26	2.11e-07	2.95e-06	0.000105661	0.00064942	0.00161901	3.61937	3.53755	3.38697	3.27539	3.1967
7.27	2.11e-07	2.95e-06	0.000105657	0.000649398	0.00161897	3.61439	3.53257	3.38199	3.27041	3.19172
7.28	2.11e-07	2.95e-06	0.000105652	0.000649377	0.00161892	3.60941	3.52759	3.37701	3.26544	3.18675
7.29	2.11e-07	2.95e-06	0.000105648	0.000649355	0.00161888	3.60443	3.52262	3.37204	3.26047	3.18177
7.3	2.11e-07	2.95e-06	0.000105643	0.000649334	0.00161883	3.59945	3.51764	3.36706	3.25549	3.17679
7.31	2.11e-07	2.95e-06	0.000105639	0.000649313	0.00161879	3.59447	3.51266	3.36208	3.25052	3.17181
7.32	2.11e-07	2.95e-06	0.000105634	0.000649293	0.00161875	3.58949	3.50768	3.3571	3.24554	3.16683
7.33	2.11e-07	2.95e-06	0.00010563	0.000649272	0.0016187	3.58451	3.5027	3.35213	3.24057	3.16185
7.34	2.11e-07	2.95e-06	0.000105626	0.000649252	0.00161866	3.57953	3.49772	3.34715	3.2356	3.15687
7.35	2.11e-07	2.95e-06	0.000105622	0.000649232	0.00161862	3.57455	3.49274	3.34217	3.23062	3.15189
7.36	2.11e-07	2.95e-06	0.000105618	0.000649212	0.00161858	3.56957	3.48776	3.3372	3.22565	3.14691
7.37	2.11e-07	2.95e-06	0.000105613	0.000649193	0.00161854	3.56459	3.48278	3.33222	3.22067	3.14193
7.38	2.11e-07	2.95e-06	0.000105609	0.000649173	0.0016185	3.55961	3.4778	3.32724	3.2157	3.13695
7.39	2.11e-07	2.95e-06	0.000105605	0.000649154	0.00161846	3.55463	3.47282	3.32227	3.21072	3.13197
7.4	2.11e-07	2.95e-06	0.000105601	0.000649135	0.00161842	3.54965	3.46784	3.31729	3.20575	3.12699
7.41	2.11e-07	2.95e-06	0.000105597	0.000649117	0.00161838	3.54467	3.46286	3.31231	3.20078	3.12201
7.42	2.11e-07	2.95e-06	0.000105594	0.000649098	0.00161834	3.5397	3.45789	3.30734	3.1958	3.11703
7.43	2.11e-07	2.95e-06	0.00010559	0.00064908	0.0016183	3.53472	3.45291	3.30236	3.19083	3.11205
7.44	2.11e-07	2.95e-06	0.000105586	0.000649062	0.00161827	3.52974	3.44793	3.29738	3.18585	3.10708
7.45	2.11e-07	2.95e-06	0.000105582	0.000649044	0.00161823	3.52476	3.44295	3.29241	3.18088	3.1021
7.46	2.11e-07	2.95e-06	0.000105578	0.000649026	0.00161819	3.51978	3.43797	3.28743	3.17591	3.09712
7.47	2.11e-07	2.95e-06	0.000105575	0.000649009	0.00161816	3.5148	3.43299	3.28245	3.17093	3.09214
7.48	2.11e-07	2.95e-06	0.000105571	0.000648992	0.00161812	3.50982	3.42801	3.27747	3.16596	3.08716
7.49	2.11e-07	2.95e-06	0.000105568	0.000648975	0.00161809	3.50484	3.42303	3.2725	3.16098	3.08218
7.5	2.11e-07	2.95e-06	0.000105564	0.000648958	0.00161805	3.49986	3.41805	3.26752	3.15601	3.0772
7.51	2.11e-07	2.95e-06	0.000105561	0.000648941	0.00161802	3.49488	3.41307	3.26254	3.15103	3.07222
7.52	2.11e-07	2.95e-06	0.000105557	0.000648925	0.00161798	3.4899	3.40809	3.25757	3.14606	3.06724
7.53	2.11e-07	2.95e-06	0.000105554	0.000648909	0.00161795	3.48492	3.40311	3.25259	3.14109	3.06226
7.54	2.11e-07	2.95e-06	0.00010555	0.000648893	0.00161791	3.47994	3.39813	3.24761	3.13611	3.05728
7.55	2.11e-07	2.95e-06	0.000105547	0.000648877	0.00161788	3.47496	3.39316	3.24264	3.13114	3.0523
7.56	2.11e-07	2.95e-06	0.000105544	0.000648861	0.00161785	3.46998	3.38818	3.23766	3.12616	3.04732
7.57	2.11e-07	2.95e-06	0.00010554	0.000648845	0.00161782	3.465	3.3832	3.23268	3.12119	3.04234
7.58	2.11e-07	2.95e-06	0.000105537	0.00064883	0.00161779	3.46003	3.37822	3.22771	3.11621	3.03736
7.59	2.11e-07	2.95e-06	0.000105534	0.000648815	0.00161775	3.45505	3.37324	3.22273	3.11124	3.03238
7.6	2.11e-07	2.95e-06	0.000105531	0.0006488	0.00161772	3.45007	3.36826	3.21775	3.10627	3.0274
7.61	2.11e-07	2.95e-06	0.000105528	0.000648785	0.00161769	3.44509	3.36328	3.21278	3.10129	3.02243
7.62	2.11e-07	2.95e-06	0.000105525	0.00064877	0.00161766	3.44011	3.3583	3.2078	3.09632	3.01745
7.63	2.11e-07	2.95e-06	0.000105522	0.000648756	0.00161763	3.43513	3.35332	3.20282	3.09134	3.01247
7.64	2.11e-07	2.95e-06	0.000105519	0.000648742	0.0016176	3.43015	3.34834	3.19784	3.08637	3.00749
7.65	2.11e-07	2.95e-06	0.000105516	0.000648727	0.00161757	3.42517	3.34336	3.19287	3.0814	3.00251
7.66	2.11e-07	2.95e-06	0.000105513	0.000648713	0.00161754	3.42019	3.33838	3.18789	3.07642	2.99753
7.67	2.11e-07	2.95e-06	0.00010551	0.0006487	0.00161751	3.41521	3.3334	3.18291	3.07145	2.99255
7.68	2.11e-07	2.95e-06	0.000105507	0.000648686	0.00161749	3.41023	3.32843	3.17794	3.06647	2.98757
7.69	2.11e-07	2.95e-06	0.000105504	0.000648672	0.00161746	3.40525	3.32345	3.17296	3.0615	2.98259
7.7	2.11e-07	2.95e-06	0.000105501	0.000648659	0.00161743	3.40027	3.31847	3.16798	3.05652	2.97761
7.71	2.11e-07	2.95e-06	0.000105498	0.000648646	0.0016174	3.39529	3.31349	3.16301	3.05155	2.97263
7.72	2.11e-07	2.95e-06	0.000105496	0.000648633	0.00161737	3.39031	3.30851	3.15803	3.04658	2.96765
7.73	2.11e-07	2.95e-06	0.000105493	0.00064862	0.00161735	3.38533	3.30353	3.15305	3.0416	2.96267
7.74	2.11e-07	2.95e-06	0.00010549	0.000648607	0.00161732	3.38036	3.29855	3.14808	3.03663	2.95769
7.75	2.11e-07	2.95e-06	0.000105488	0.000648594	0.00161729	3.37538	3.29357	3.1431	3.03165	2.95271
7.76	2.11e-07	2.95e-06	0.000105485	0.000648582	0.00161727	3.3704	3.28859	3.13812	3.02668	2.94773
7.77	2.11e-07	2.95e-06	0.000105482	0.000648569	0.00161724	3.36542	3.28361	3.13315	3.0217	2.94276
7.78	2.11e-07	2.95e-06	0.00010548	0.000648557	0.00161722	3.36044	3.27863	3.12817	3.01673	2.93778
7.79	2.11e-07	2.95e-06	0.000105477	0.000648545	0.00161719	3.35546	3.27365	3.12319	3.01176	2.9328
7.8	2.11e-07	2.95e-06	0.000105475	0.000648533	0.00161717	3.35048	3.26867	3.11822	3.00678	2.92782
7.81	2.11e-07	2.95e-06	0.000105472	0.000648521	0.00161714	3.3455	3.2637	3.11324	3.00181	2.92284
7.82	2.11e-07	2.95e-06	0.00010547	0.00064851	0.00161712	3.34052	3.25872	3.10826	2.99683	2.91786
7.83	2.11e-07	2.95e-06	0.000105467	0.000648498	0.0016171	3.33554	3.25374	3.10328	2.99186	2.91288
7.84	2.11e-07	2.95e-06	0.000105465	0.000648487	0.00161707	3.33056	3.24876	3.09831	2.98689	2.9079
7.85	2.11e-07	2.95e-06	0.000105463	0.000648476	0.00161705	3.32558	3.24378	3.09333	2.98191	2.90292
7.86	2.11e-07	2.95e-06	0.00010546	0.000648465	0.00161703	3.3206	3.2388	3.08835	2.97694	2.89794
7.87	2.11e-07	2.94e-06	0.000105458	0.000648454	0.001617	3.31562	3.23382	3.08338	2.97196	2.89296
7.88	2.11e-07	2.94e-06	0.000105456	0.000648443	0.00161698	3.31064	3.22884	3.0784	2.96699	2.88798
7.89	2.11e-07	2.94e-06	0.000105453	0.000648432	0.00161696	3.30566	3.22386	3.07342	2.96201	2.883
7.9	2.11e-07	2.94e-06	0.000105451	0.000648421	0.00161693	3.30069	3.21888	3.06845	2.95704	2.87802
7.91	2.11e-07	2.94e-06	0.000105449	0.000648411	0.00161691	3.29571	3.2139	3.06347	2.95207	2.87304
7.92	2.11e-07	2.94e-06	0.000105447	0.0006484	0.00161689	3.29073	3.20892	3.05849	2.94709	2.86806
7.93	2.11e-07	2.94e-06	0.000105445	0.00064839	0.00161687	3.28575	3.20394	3.05352	2.94212	2.86308
7.94	2.11e-07	2.94e-06	0.000105443	0.00064838	0.00161685	3.28077	3.19897	3.04854	2.93714	2.85811
7.95	2.1e-07	2.94e-06	0.00010544	0.00064837	0.00161683	3.27579	3.19399	3.04356	2.93217	2.85313
7.96	2.1e-07	2.94e-06	0.000105438	0.00064836	0.00161681	3.27081	3.18901	3.03859	2.92719	2.84815
7.97	2.1e-07	2.94e-06	0.000105436	0.00064835	0.00161679	3.26583	3.18403	3.03361	2.92222	2.84317
7.98	2.1e-07	2.94e-06	0.000105434	0.00064834	0.00161677	3.26085	3.17905	3.02863	2.91725	2.83819
7.99	2.1e-07	2.94e-06	0.000105432	0.000648331	0.00161675	3.25587	3.17407	3.02365	2.91227	2.83321
8	2.1e-07	2.94e-06	0.00010543	0.000648321	0.00161673	3.25089	3.16909	3.01868	2.9073	2.82823
8.01	2.1e-07	2.94e-06	0.000105428	0.000648312	0.00161671	3.24591	3.16411	3.0137	2.90232	2.82325
8.02	2.1e-07	2.94e-06	0.000105426	0.000648303	0.00161669	3.24093	3.15913	3.00872	2.89735	2.81827
8.03	2.1e-07	2.94e-06	0.000105424	0.000648294	0.00161667	3.23595	3.15415	3.00375	2.89238	2.81329
8.04	2.1e-07	2.94e-06	0.000105422	0.000648284	0.00161665	3.23097	3.14917	2.99877	2.8874	2.80831
8.05	2.1e-07	2.94e-06	0.000105421	0.000648276	0.00161663	3.22599	3.14419	2.99379	2.88243	2.80333
8.06	2.1e-07	2.94e-06	0.000105419	0.000648267	0.00161661	3.22102	3.13922	2.98882	2.87745	2.79835
8.07	2.1e-07	2.94e-06	0.000105417	0.000648258	0.00161659	3.21604	3.13424	2.98384	2.87248	2.79337
8.08	2.1e-07	2.94e-06	0.000105415	0.000648249	0.00161658	3.21106	3.12926	2.97886	2.8675	2.78839
8.09	2.1e-07	2.94e-06	0.000105413	0.000648241	0.00161656	3.20608	3.12428	2.97389	2.86253	2.78341
8.1	2.1e-07	2.94e-06	0.000105412	0.000648232	0.00161654	3.2011	3.1193	2.96891	2.85756	2.77844
8.11	2.1e-07	2.94e-06	0.00010541	0.000648224	0.00161652	3.19612	3.11432	2.96393	2.85258	2.77346
8.12	2.1e-07	2.94e-06	0.000105408	0.000648216	0.00161651	3.19114	3.10934	2.95896	2.84761	2.76848
8.13	2.1e-07	2.94e-06	0.000105406	0.000648207	0.00161649	3.18616	3.10436	2.95398	2.84263	2.7635
8.14	2.1e-07	2.94e-06	0.000105405	0.000648199	0.00161647	3.18118	3.09938	2.949	2.83766	2.75852
8.15	2.1e-07	2.94e-06	0.000105403	0.000648191	0.00161646	3.1762	3.0944	2.94402	2.83268	2.75354
8.16	2.1e-07	2.94e-06	0.000105401	0.000648184	0.00161644	3.17122	3.08942	2.93905	2.82771	2.74856
8.17	2.1e-07	2.94e-06	0.0001054	0.000648176	0.00161642	3.16624	3.08444	2.93407	2.82274	2.74358
8.18	2.1e-07	2.94e-06	0.000105398	0.000648168	0.00161641	3.16126	3.07946	2.92909	2.81776	2.7386
8.19	2.1e-07	2.94e-06	0.000105396	0.00064816	0.00161639	3.15628	3.07449	2.92412	2.81279	2.73362
8.2	2.1e-07	2.94e-06	0.000105395	0.000648153	0.00161638	3.1513	3.06951	2.91914	2.80781	2.72864
8.21	2.1e-07	2.94e-06	0.000105393	0.000648145	0.00161636	3.14632	3.06453	2.91416	2.80284	2.72366
8.22	2.1e-07	2.94e-06	0.000105392	0.000648138	0.00161635	3.14135	3.05955	2.90919	2.79787	2.71868
8.23	2.1e-07	2.94e-06	0.00010539	0.000648131	0.00161633	3.13637	3.05457	2.90421	2.79289	2.7137
8.24	2.1e-07	2.94e-06	0.000105389	0.000648124	0.00161632	3.13139	3.04959	2.89923	2.78792	2.70872
8.25	2.1e-07	2.94e-06	0.000105387	0.000648116	0.0016163	3.12641	3.04461	2.89426	2.78294	2.70374
8.26	2.1e-07	2.94e-06	0.000105386	0.000648109	0.00161629	3.12143	3.03963	2.88928	2.77797	2.69876
8.27	2.1e-07	2.94e-06	0.000105384	0.000648102	0.00161627	3.11645	3.03465	2.8843	2.77299	2.69379
8.28	2.1e-07	2.94e-06	0.000105383	0.000648096	0.00161626	3.11147	3.02967	2.87933	2.76802	2.68881
8.29	2.1e-07	2.94e-06	0.000105381	0.000648089	0.00161624	3.10649	3.02469	2.87435	2.76305	2.68383
8.3	2.1e-07	2.94e-06	0.00010538	0.000648082	0.00161623	3.10151	3.01971	2.86937	2.75807	2.67885
8.31	2.1e-07	2.94e-06	0.000105379	0.000648075	0.00161622	3.09653	3.01473	2.86439	2.7531	2.67387
8.32	2.1e-07	2.94e-06	0.000105377	0.000648069	0.0016162	3.09155	3.00976	2.85942	2.74812	2.66889
8.33	2.1e-07	2.94e-06	0.000105376	0.000648062	0.00161619	3.08657	3.00478	2.85444	2.74315	2.66391
8.34	2.1e-07	2.94e-06	0.000105374	0.000648056	0.00161618	3.08159	2.9998	2.84946	2.73817	2.65893
8.35	2.1e-07	2.94e-06	0.000105373	0.00064805	0.00161616	3.07661	2.99482	2.84449	2.7332	2.65395
8.36	2.1e-07	2.94e-06	0.000105372	0.000648043	0.00161615	3.07163	2.98984	2.83951	2.72823	2.64897
8.37	2.1e-07	2.94e-06	0.00010537	0.000648037	0.00161614	3.06665	2.98486	2.83453	2.72325	2.64399
8.38	2.1e-07	2.94e-06	0.000105369	0.000648031	0.00161612	3.06168	2.97988	2.82956	2.71828	2.63901
8.39	2.1e-07	2.94e-06	0.000105368	0.000648025	0.00161611	3.0567	2.9749	2.82458	2.7133	2.63403
8.4	2.1e-07	2.94e-06	0.000105367	0.000648019	0.0016161	3.05172	2.96992	2.8196	2.70833	2.62905
8.41	2.1e-07	2.94e-06	0.000105365	0.000648013	0.00161609	3.04674	2.96494	2.81463	2.70336	2.62407
8.42	2.1e-07	2.94e-06	0.000105364	0.000648007	0.00161607	3.04176	2.95996	2.80965	2.69838	2.61909
8.43	2.1e-07	2.94e-06	0.000105363	0.000648001	0.00161606	3.03678	2.95498	2.80467	2.69341	2.61412
8.44	2.1e-07	2.94e-06	0.000105362	0.000647996	0.00161605	3.0318	2.95	2.7997	2.68843	2.60914
8.45	2.1e-07	2.94e-06	0.000105361	0.00064799	0.00161604	3.02682	2.94503	2.79472	2.68346	2.60416
8.46	2.1e-07	2.94e-06	0.000105359	0.000647984	0.00161603	3.02184	2.94005	2.78974	2.67848	2.59918
8.47	2.1e-07	2.94e-06	0.000105358	0.000647979	0.00161601	3.01686	2.93507	2.78477	2.67351	2.5942
8.48	2.1e-07	2.94e-06	0.000105357	0.000647973	0.001616	3.01188	2.93009	2.77979	2.66854	2.58922
8.49	2.1e-07	2.94e-06	0.000105356	0.000647968	0.00161599	3.0069	2.92511	2.77481	2.66356	2.58424
8.5	2.1e-07	2.94e-06	0.000105355	0.000647963	0.00161598	3.00192	2.92013	2.76983	2.65859	2.57926
8.51	2.1e-07	2.94e-06	0.000105354	0.000647957	0.00161597	2.99694	2.91515	2.76486	2.65361	2.57428
8.52	2.1e-07	2.94e-06	0.000105353	0.000647952	0.00161596	2.99196	2.91017	2.75988	2.64864	2.5693
8.53	2.1e-07	2.94e-06	0.000105352	0.000647947	0.00161595	2.98698	2.90519	2.7549	2.64366	2.56432
8.54	2.1e-07	2.94e-06	0.00010535	0.000647942	0.00161594	2.98201	2.90021	2.74993	2.63869	2.55934
8.55	2.1e-07	2.94e-06	0.000105349	0.000647937	0.00161593	2.97703	2.89523	2.74495	2.63372	2.55436
8.56	2.1e-07	2.94e-06	0.000105348	0.000647932	0.00161592	2.97205	2.89025	2.73997	2.62874	2.54938
8.57	2.1e-07	2.94e-06	0.000105347	0.000647927	0.00161591	2.96707	2.88527	2.735	2.62377	2.5444
8.58	2.1e-07	2.94e-06	0.000105346	0.000647922	0.0016159	2.96209	2.8803	2.73002	2.61879	2.53942
8.59	2.1e-07	2.94e-06	0.000105345	0.000647917	0.00161589	2.95711	2.87532	2.72504	2.61382	2.53444
8.6	2.1e-07	2.94e-06	0.000105344	0.000647912	0.00161588	2.95213	2.87034	2.72007	2.60885	2.52947
8.61	2.1e-07	2.94e-06	0.000105343	0.000647908	0.00161587	2.94715	2.86536	2.71509	2.60387	2.52449
8.62	2.1e-07	2.94e-06	0.000105342	0.000647903	0.00161586	2.94217	2.86038	2.71011	2.5989	2.51951
8.63	2.1e-07	2.94e-06	0.000105341	0.000647898	0.00161585	2.93719	2.8554	2.70514	2.59392	2.51453
8.64	2.1e-07	2.94e-06	0.00010534	0.000647894	0.00161584	2.93221	2.85042	2.70016	2.58895	2.50955
8.65	2.1e-07	2.94e-06	0.000105339	0.000647889	0.00161583	2.92723	2.84544	2.69518	2.58397	2.50457
8.66	2.1e-07	2.94e-06	0.000105339	0.000647885	0.00161582	2.92225	2.84046	2.6902	2.579	2.49959
8.67	2.1e-07	2.94e-06	0.000105338	0.00064788	0.00161581	2.91727	2.83548	2.68523	2.57403	2.49461
8.68	2.1e-07	2.94e-06	0.000105337	0.000647876	0.0016158	2.91229	2.8305	2.68025	2.56905	2.48963
8.69	2.1e-07	2.94e-06	0.000105336	0.000647872	0.00161579	2.90731	2.82552	2.67527	2.56408	2.48465
8.7	2.1e-07	2.94e-06	0.000105335	0.000647868	0.00161578	2.90234	2.82054	2.6703	2.5591	2.47967
8.71	2.1e-07	2.94e-06	0.000105334	0.000647863	0.00161578	2.89736	2.81557	2.66532	2.55413	2.47469
8.72	2.1e-07	2.94e-06	0.000105333	0.000647859	0.00161577	2.89238	2.81059	2.66034	2.54915	2.46971
8.73	2.1e-07	2.94e-06	0.000105332	0.000647855	0.00161576	2.8874	2.80561	2.65537	2.54418	2.46473
8.74	2.1e-07	2.94e-06	0.000105331	0.000647851	0.00161575	2.88242	2.80063	2.65039	2.53921	2.45975
8.75	2.1e-07	2.94e-06	0.000105331	0.000647847	0.00161574	2.87744	2.79565	2.64541	2.53423	2.45477
8.76	2.1e-07	2.94e-06	0.00010533	0.000647843	0.00161573	2.87246	2.79067	2.64044	2.52926	2.4498
8.77	2.1e-07	2.94e-06	0.000105329	0.000647839	0.00161572	2.86748	2.78569	2.63546	2.52428	2.44482
8.78	2.1e-07	2.94e-06	0.000105328	0.000647835	0.00161572	2.8625	2.78071	2.63048	2.51931	2.43984
8.79	2.1e-07	2.94e-06	0.000105327	0.000647831	0.00161571	2.85752	2.77573	2.62551	2.51434	2.43486
8.8	2.1e-07	2.94e-06	0.000105327	0.000647828	0.0016157	2.85254	2.77075	2.62053	2.50936	2.42988
8.81	2.1e-07	2.94e-06	0.000105326	0.000647824	0.00161569	2.84756	2.76577	2.61555	2.50439	2.4249
8.82	2.1e-07	2.94e-06	0.000105325	0.00064782	0.00161569	2.84258	2.76079	2.61057	2.49941	2.41992
8.83	2.1e-07	2.94e-06	0.000105324	0.000647817	0.00161568	2.8376	2.75581	2.6056	2.49444	2.41494
8.84	2.1e-07	2.94e-06	0.000105323	0.000647813	0.00161567	2.83262	2.75084	2.60062	2.48946	2.40996
8.85	2.1e-07	2.94e-06	0.000105323	0.000647809	0.00161566	2.82764	2.74586	2.59564	2.48449	2.40498
8.86	2.1e-07	2.94e-06	0.000105322	0.000647806	0.00161566	2.82267	2.74088	2.59067	2.47952	2.4
8.87	2.1e-07	2.94e-06	0.000105321	0.000647802	0.00161565	2.81769	2.7359	2.58569	2.47454	2.39502
8.88	2.1e-07	2.94e-06	0.00010532	0.000647799	0.00161564	2.81271	2.73092	2.58071	2.46957	2.39004
8.89	2.1e-07	2.94e-06	0.00010532	0.000647795	0.00161563	2.80773	2.72594	2.57574	2.46459	2.38506
8.9	2.1e-07	2.94e-06	0.000105319	0.000647792	0.00161563	2.80275	2.72096	2.57076	2.45962	2.38008
8.91	2.1e-07	2.94e-06	0.000105318	0.000647789	0.00161562	2.79777	2.71598	2.56578	2.45464	2.3751
8.92	2.1e-07	2.94e-06	0.000105318	0.000647785	0.00161561	2.79279	2.711	2.56081	2.44967	2.37012
8.93	2.1e-07	2.94e-06	0.000105317	0.000647782	0.00161561	2.78781	2.70602	2.55583	2.4447	2.36515
8.94	2.1e-07	2.94e-06	0.000105316	0.000647779	0.0016156	2.78283	2.70104	2.55085	2.43972	2.36017
8.95	2.1e-07	2.94e-06	0.000105316	0.000647776	0.00161559	2.77785	2.69606	2.54588	2.43475	2.35519
8.96	2.1e-07	2.94e-06	0.000105315	0.000647773	0.00161559	2.77287	2.69108	2.5409	2.42977	2.35021
8.97	2.1e-07	2.94e-06	0.000105314	0.000647769	0.00161558	2.76789	2.68611	2.53592	2.4248	2.34523
8.98	2.1e-07	2.94e-06	0.000105314	0.000647766	0.00161557	2.76291	2.68113	2.53094	2.41983	2.34025
8.99	2.1e-07	2.94e-06	0.000105313	0.000647763	0.00161557	2.75793	2.67615	2.52597	2.41485	2.33527
9	2.1e-07	2.94e-06	0.000105312	0.00064776	0.00161556	2.75295	2.67117	2.52099	2.40988	2.33029
9.01	2.1e-07	2.94e-06	0.000105312	0.000647757	0.00161556	2.74797	2.66619	2.51601	2.4049	2.32531
9.02	2.1e-07	2.94e-06	0.000105311	0.000647754	0.00161555	2.743	2.66121	2.51104	2.39993	2.32033
9.03	2.1e-07	2.94e-06	0.000105311	0.000647751	0.00161554	2.73802	2.65623	2.50606	2.39495	2.31535
9.04	2.1e-07	2.94e-06	0.00010531	0.000647749	0.00161554	2.73304	2.65125	2.50108	2.38998	2.31037
9.05	2.1e-07	2.94e-06	0.000105309	0.000647746	0.00161553	2.72806	2.64627	2.49611	2.38501	2.30539
9.06	2.1e-07	2.94e-06	0.000105309	0.000647743	0.00161553	2.72308	2.64129	2.49113	2.38003	2.30041
9.07	2.1e-07	2.94e-06	0.000105308	0.00064774	0.00161552	2.7181	2.63631	2.48615	2.37506	2.29543
9.08	2.1e-07	2.94e-06	0.000105308	0.000647737	0.00161551	2.71312	2.63133	2.48118	2.37008	2.29045
9.09	2.1e-07	2.94e-06	0.000105307	0.000647735	0.00161551	2.70814	2.62635	2.4762	2.36511	2.28548
9.1	2.1e-07	2.94e-06	0.000105306	0.000647732	0.0016155	2.70316	2.62138	2.47122	2.36013	2.2805
9.11	2.1e-07	2.94e-06	0.000105306	0.000647729	0.0016155	2.69818	2.6164	2.46625	2.35516	2.27552
9.12	2.1e-07	2.94e-06	0.000105305	0.000647727	0.00161549	2.6932	2.61142	2.46127	2.35019	2.27054
9.13	2.1e-07	2.94e-06	0.000105305	0.000647724	0.00161549	2.68822	2.60644	2.45629	2.34521	2.26556
9.14	2.1e-07	2.94e-06	0.000105304	0.000647722	0.00161548	2.68324	2.60146	2.45131	2.34024	2.26058
9.15	2.1e-07	2.94e-06	0.000105304	0.000647719	0.00161547	2.67826	2.59648	2.44634	2.33526	2.2556
9.16	2.1e-07	2.94e-06	0.000105303	0.000647716	0.00161547	2.67328	2.5915	2.44136	2.33029	2.25062
9.17	2.1e-07	2.94e-06	0.000105303	0.000647714	0.00161546	2.6683	2.58652	2.43638	2.32531	2.24564
9.18	2.1e-07	2.94e-06	0.000105302	0.000647712	0.00161546	2.66332	2.58154	2.43141	2.32034	2.24066
9.19	2.1e-07	2.94e-06	0.000105302	0.000647709	0.00161546	2.65835	2.57656	2.42643	2.31537	2.23568
9.2	2.1e-07	2.94e-06	0.000105301	0.000647707	0.00161545	2.65337	2.57158	2.42145	2.31039	2.2307
9.21	2.1e-07	2.94e-06	0.000105301	0.000647704	0.00161545	2.64839	2.5666	2.41648	2.30542	2.22572
9.22	2.1e-07	2.94e-06	0.0001053	0.000647702	0.00161544	2.64341	2.56162	2.4115	2.30044	2.22074
9.23	2.1e-07	2.94e-06	0.0001053	0.0006477	0.00161543	2.63843	2.55665	2.40652	2.29547	2.21576
9.24	2.1e-07	2.94e-06	0.000105299	0.000647697	0.00161543	2.63345	2.55167	2.40155	2.2905	2.21078
9.25	2.1e-07	2.94e-06	0.000105299	0.000647695	0.00161543	2.62847	2.54669	2.39657	2.28552	2.2058
9.26	2.1e-07	2.94e-06	0.000105298	0.000647693	0.00161542	2.62349	2.54171	2.39159	2.28055	2.20083
9.27	2.1e-07	2.94e-06	0.000105298	0.000647691	0.00161542	2.61851	2.53673	2.38662	2.27557	2.19585
9.28	2.1e-07	2.94e-06	0.000105297	0.000647688	0.00161541	2.61353	2.53175	2.38164	2.2706	2.19087
9.29	2.1e-07	2.94e-06	0.000105297	0.000647686	0.00161541	2.60855	2.52677	2.37666	2.26562	2.18589
9.3	2.1e-07	2.94e-06	0.000105296	0.000647684	0.0016154	2.60357	2.52179	2.37169	2.26065	2.18091
9.31	2.1e-07	2.94e-06	0.000105296	0.000647682	0.0016154	2.59859	2.51681	2.36671	2.25568	2.17593
9.32	2.1e-07	2.94e-06	0.000105296	0.00064768	0.00161539	2.59361	2.51183	2.36173	2.2507	2.17095
9.33	2.1e-07	2.94e-06	0.000105295	0.000647678	0.00161539	2.58863	2.50685	2.35675	2.24573	2.16597
9.34	2.1e-07	2.94e-06	0.000105295	0.000647676	0.00161539	2.58365	2.50187	2.35178	2.24075	2.16099
9.35	2.1e-07	2.94e-06	0.000105294	0.000647674	0.00161538	2.57868	2.49689	2.3468	2.23578	2.15601
9.36	2.1e-07	2.94e-06	0.000105294	0.000647672	0.00161538	2.5737	2.49192	2.34182	2.2308	2.15103
9.37	2.1e-07	2.94e-06	0.000105293	0.00064767	0.00161537	2.56872	2.48694	2.33685	2.22583	2.14605
9.38	2.1e-07	2.94e-06	0.000105293	0.000647668	0.00161537	2.56374	2.48196	2.33187	2.22086	2.14107
9.39	2.1e-07	2.94e-06	0.000105293	0.000647666	0.00161537	2.55876	2.47698	2.32689	2.21588	2.13609
9.4	2.1e-07	2.94e-06	0.000105292	0.000647664	0.00161536	2.55378	2.472	2.32192	2.21091	2.13111
9.41	2.1e-07	2.94e-06	0.000105292	0.000647662	0.00161536	2.5488	2.46702	2.31694	2.20593	2.12613
9.42	2.1e-07	2.94e-06	0.000105291	0.00064766	0.00161535	2.54382	2.46204	2.31196	2.20096	2.12116
9.43	2.1e-07	2.94e-06	0.000105291	0.000647659	0.00161535	2.53884	2.45706	2.30699	2.19599	2.11618
9.44	2.1e-07	2.94e-06	0.000105291	0.000647657	0.00161535	2.53386	2.45208	2.30201	2.19101	2.1112
9.45	2.1e-07	2.94e-06	0.00010529	0.000647655	0.00161534	2.52888	2.4471	2.29703	2.18604	2.10622
9.46	2.1e-07	2.94e-06	0.00010529	0.000647653	0.00161534	2.5239	2.44212	2.29206	2.18106	2.10124
9.47	2.1e-07	2.94e-06	0.000105289	0.000647651	0.00161534	2.51892	2.43714	2.28708	2.17609	2.09626
9.48	2.1e-07	2.94e-06	0.000105289	0.00064765	0.00161533	2.51394	2.43216	2.2821	2.17111	2.09128
9.49	2.1e-07	2.94e-06	0.000105289	0.000647648	0.00161533	2.50896	2.42719	2.27712	2.16614	2.0863
9.5	2.1e-07	2.94e-06	0.000105288	0.000647646	0.00161532	2.50398	2.42221	2.27215	2.16117	2.08132
9.51	2.1e-07	2.94e-06	0.000105288	0.000647645	0.00161532	2.49901	2.41723	2.26717	2.15619	2.07634
9.52	2.1e-07	2.94e-06	0.000105288	0.000647643	0.00161532	2.49403	2.41225	2.26219	2.15122	2.07136
9.53	2.1e-07	2.94e-06	0.000105287	0.000647641	0.00161531	2.48905	2.40727	2.25722	2.14624	2.06638
9.54	2.1e-07	2.94e-06	0.000105287	0.00064764	0.00161531	2.48407	2.40229	2.25224	2.14127	2.0614
9.55	2.1e-07	2.94e-06	0.000105287	0.000647638	0.00161531	2.47909	2.39731	2.24726	2.13629	2.05642
9.56	2.1e-07	2.94e-06	0.000105286	0.000647636	0.0016153	2.47411	2.39233	2.24229	2.13132	2.05144
9.57	2.1e-07	2.94e-06	0.000105286	0.000647635	0.0016153	2.46913	2.38735	2.23731	2.12635	2.04646
9.58	2.1e-07	2.94e-06	0.000105286	0.000647633	0.0016153	2.46415	2.38237	2.23233	2.12137	2.04148
9.59	2.1e-07	2.94e-06	0.000105285	0.000647632	0.00161529	2.45917	2.37739	2.22736	2.1164	2.03651
9.6	2.1e-07	2.94e-06	0.000105285	0.00064763	0.00161529	2.45419	2.37241	2.22238	2.11142	2.03153
9.61	2.1e-07	2.94e-06	0.000105285	0.000647629	0.00161529	2.44921	2.36743	2.2174	2.10645	2.02655
9.62	2.1e-07	2.94e-06	0.000105284	0.000647627	0.00161528	2.44423	2.36246	2.21243	2.10148	2.02157
9.63	2.1e-07	2.94e-06	0.000105284	0.000647626	0.00161528	2.43925	2.35748	2.20745	2.0965	2.01659
9.64	2.1e-07	2.94e-06	0.000105284	0.000647624	0.00161528	2.43427	2.3525	2.20247	2.09153	2.01161
9.65	2.1e-07	2.94e-06	0.000105284	0.000647623	0.00161528	2.42929	2.34752	2.19749	2.08655	2.00663
9.66	2.1e-07	2.94e-06	0.000105283	0.000647622	0.00161527	2.42431	2.34254	2.19252	2.08158	2.00165
9.67	2.1e-07	2.94e-06	0.000105283	0.00064762	0.00161527	2.41934	2.33756	2.18754	2.0766	1.99667
9.68	2.1e-07	2.94e-06	0.000105283	0.000647619	0.00161527	2.41436	2.33258	2.18256	2.07163	1.99169
9.69	2.1e-07	2.94e-06	0.000105282	0.000647617	0.00161527	2.40938	2.3276	2.17759	2.06666	1.98671
9.7	2.1e-07	2.94e-06	0.000105282	0.000647616	0.00161526	2.4044	2.32262	2.17261	2.06168	1.98173
9.71	2.1e-07	2.94e-06	0.000105282	0.000647615	0.00161526	2.39942	2.31764	2.16763	2.05671	1.97675
9.72	2.1e-07	2.94e-06	0.000105282	0.000647613	0.00161526	2.39444	2.31266	2.16266	2.05173	1.97177
9.73	2.1e-07	2.94e-06	0.000105281	0.000647612	0.00161525	2.38946	2.30768	2.15768	2.04676	1.96679
9.74	2.1e-07	2.94e-06	0.000105281	0.000647611	0.00161525	2.38448	2.3027	2.1527	2.04178	1.96181
9.75	2.1e-07	2.94e-06	0.000105281	0.000647609	0.00161525	2.3795	2.29773	2.14773	2.03681	1.95684
9.76	2.1e-07	2.94e-06	0.00010528	0.000647608	0.00161525	2.37452	2.29275	2.14275	2.03184	1.95186
9.77	2.1e-07	2.94e-06	0.00010528	0.000647607	0.00161524	2.36954	2.28777	2.13777	2.02686	1.94688
9.78	2.1e-07	2.94e-06	0.00010528	0.000647606	0.00161524	2.36456	2.28279	2.1328	2.02189	1.9419
9.79	2.1e-07	2.94e-06	0.00010528	0.000647605	0.00161524	2.35958	2.27781	2.12782	2.01691	1.93692
9.8	2.1e-07	2.94e-06	0.000105279	0.000647603	0.00161524	2.3546	2.27283	2.12284	2.01194	1.93194
9.81	2.1e-07	2.94e-06	0.000105279	0.000647602	0.00161523	2.34962	2.26785	2.11786	2.00697	1.92696
9.82	2.1e-07	2.94e-06	0.000105279	0.000647601	0.00161523	2.34464	2.26287	2.11289	2.00199	1.92198
9.83	2.1e-07	2.94e-06	0.000105279	0.0006476	0.00161523	2.33967	2.25789	2.10791	1.99702	1.917
9.84	2.1e-07	2.94e-06	0.000105278	0.000647599	0.00161523	2.33469	2.25291	2.10293	1.99204	1.91202
9.85	2.1e-07	2.94e-06	0.000105278	0.000647597	0.00161522	2.32971	2.24793	2.09796	1.98707	1.90704
9.86	2.1e-07	2.94e-06	0.000105278	0.000647596	0.00161522	2.32473	2.24295	2.09298	1.98209	1.90206
9.87	2.1e-07	2.94e-06	0.000105278	0.000647595	0.00161522	2.31975	2.23797	2.088	1.97712	1.89708
9.88	2.1e-07	2.94e-06	0.000105277	0.000647594	0.00161522	2.31477	2.233	2.08303	1.97215	1.8921
9.89	2.1e-07	2.94e-06	0.000105277	0.000647593	0.00161521	2.30979	2.22802	2.07805	1.96717	1.88712
9.9	2.1e-07	2.94e-06	0.000105277	0.000647592	0.00161521	2.30481	2.22304	2.07307	1.9622	1.88214
9.91	2.1e-07	2.94e-06	0.000105277	0.000647591	0.00161521	2.29983	2.21806	2.0681	1.95722	1.87716
9.92	2.1e-07	2.94e-06	0.000105277	0.00064759	0.00161521	2.29485	2.21308	2.06312	1.95225	1.87219
9.93	2.1e-07	2.94e-06	0.000105276	0.000647589	0.0016152	2.28987	2.2081	2.05814	1.94727	1.86721
9.94	2.1e-07	2.94e-06	0.000105276	0.000647588	0.0016152	2.28489	2.20312	2.05317	1.9423	1.86223
9.95	2.1e-07	2.94e-06	0.000105276	0.000647587	0.0016152	2.27991	2.19814	2.04819	1.93733	1.85725
9.96	2.1e-07	2.94e-06	0.000105276	0.000647586	0.0016152	2.27493	2.19316	2.04321	1.93235	1.85227
9.97	2.1e-07	2.94e-06	0.000105276	0.000647585	0.0016152	2.26995	2.18818	2.03823	1.92738	1.84729
9.98	2.1e-07	2.94e-06	0.000105275	0.000647584	0.0016152	2.26497	2.1832	2.03326	1.9224	1.84231
9.99	2.1e-07	2.94e-06	0.000105275	0.000647583	0.00161519	2.26	2.17822	2.02828	1.91743	1.83733
10	2.1e-07	2.94e-06	0.000105275	0.000647582	0.00161519	2.25502	2.17324	2.0233	1.91246	1.83235
10.01	2.1e-07	2.94e-06	0.000105275	0.000647581	0.00161519	2.25004	2.16827	2.01833	1.90748	1.82737
10.02	2.1e-07	2.94e-06	0.000105275	0.00064758	0.00161519	2.24506	2.16329	2.01335	1.90251	1.82239
10.03	2.1e-07	2.94e-06	0.000105274	0.000647579	0.00161519	2.24008	2.15831	2.00837	1.89753	1.81741
10.04	2.1e-07	2.94e-06	0.000105274	0.000647578	0.00161518	2.2351	2.15333	2.0034	1.89256	1.81243
10.05	2.1e-07	2.94e-06	0.000105274	0.000647577	0.00161518	2.23012	2.14835	1.99842	1.88758	1.80745
10.06	2.1e-07	2.94e-06	0.000105274	0.000647576	0.00161518	2.22514	2.14337	1.99344	1.88261	1.80247
10.07	2.1e-07	2.94e-06	0.000105274	0.000647575	0.00161518	2.22016	2.13839	1.98847	1.87764	1.79749
10.08	2.1e-07	2.94e-06	0.000105273	0.000647575	0.00161518	2.21518	2.13341	1.98349	1.87266	1.79252
10.09	2.1e-07	2.94e-06	0.000105273	0.000647574	0.00161517	2.2102	2.12843	1.97851	1.86769	1.78754
10.1	2.1e-07	2.94e-06	0.000105273	0.000647573	0.00161517	2.20522	2.12345	1.97354	1.86271	1.78256
10.11	2.1e-07	2.94e-06	0.000105273	0.000647572	0.00161517	2.20024	2.11847	1.96856	1.85774	1.77758
10.12	2.1e-07	2.94e-06	0.000105273	0.000647571	0.00161517	2.19526	2.11349	1.96358	1.85276	1.7726
10.13	2.1e-07	2.94e-06	0.000105272	0.00064757	0.00161517	2.19028	2.10851	1.9586	1.84779	1.76762
10.14	2.1e-07	2.94e-06	0.000105272	0.00064757	0.00161517	2.1853	2.10354	1.95363	1.84282	1.76264
10.15	2.1e-07	2.94e-06	0.000105272	0.000647569	0.00161516	2.18033	2.09856	1.94865	1.83784	1.75766
10.16	2.1e-07	2.94e-06	0.000105272	0.000647568	0.00161516	2.17535	2.09358	1.94367	1.83287	1.75268
10.17	2.1e-07	2.94e-06	0.000105272	0.000647567	0.00161516	2.17037	2.0886	1.9387	1.82789	1.7477
10.18	2.1e-07	2.94e-06	0.000105272	0.000647566	0.00161516	2.16539	2.08362	1.93372	1.82292	1.74272
10.19	2.1e-07	2.94e-06	0.000105271	0.000647566	0.00161516	2.16041	2.07864	1.92874	1.81794	1.73774
10.2	2.1e-07	2.94e-06	0.000105271	0.000647565	0.00161516	2.15543	2.07366	1.92377	1.81297	1.73276
10.21	2.1e-07	2.94e-06	0.000105271	0.000647564	0.00161515	2.15045	2.06868	1.91879	1.808	1.72778
10.22	2.1e-07	2.94e-06	0.000105271	0.000647563	0.00161515	2.14547	2.0637	1.91381	1.80302	1.7228
10.23	2.1e-07	2.94e-06	0.000105271	0.000647563	0.00161515	2.14049	2.05872	1.90884	1.79805	1.71782
10.24	2.1e-07	2.94e-06	0.000105271	0.000647562	0.00161515	2.13551	2.05374	1.90386	1.79307	1.71284
10.25	2.1e-07	2.94e-06	0.000105271	0.000647561	0.00161515	2.13053	2.04876	1.89888	1.7881	1.70787
10.26	2.1e-07	2.94e-06	0.00010527	0.00064756	0.00161515	2.12555	2.04378	1.89391	1.78313	1.70289
10.27	2.1e-07	2.94e-06	0.00010527	0.00064756	0.00161514	2.12057	2.03881	1.88893	1.77815	1.69791
10.28	2.1e-07	2.94e-06	0.00010527	0.000647559	0.00161514	2.11559	2.03383	1.88395	1.77318	1.69293
10.29	2.1e-07	2.94e-06	0.00010527	0.000647558	0.00161514	2.11061	2.02885	1.87898	1.7682	1.68795
10.3	2.1e-07	2.94e-06	0.00010527	0.000647558	0.00161514	2.10563	2.02387	1.874	1.76323	1.68297
10.31	2.1e-07	2.94e-06	0.00010527	0.000647557	0.00161514	2.10066	2.01889	1.86902	1.75825	1.67799
10.32	2.1e-07	2.94e-06	0.00010527	0.000647556	0.00161514	2.09568	2.01391	1.86404	1.75328	1.67301
10.33	2.1e-07	2.94e-06	0.000105269	0.000647556	0.00161514	2.0907	2.00893	1.85907	1.74831	1.66803
10.34	2.1e-07	2.94e-06	0.000105269	0.000647555	0.00161513	2.08572	2.00395	1.85409	1.74333	1.66305
10.35	2.1e-07	2.94e-06	0.000105269	0.000647554	0.00161513	2.08074	1.99897	1.84911	1.73836	1.65807
10.36	2.1e-07	2.94e-06	0.000105269	0.000647554	0.00161513	2.07576	1.99399	1.84414	1.73338	1.65309
10.37	2.1e-07	2.94e-06	0.000105269	0.000647553	0.00161513	2.07078	1.98901	1.83916	1.72841	1.64811
10.38	2.1e-07	2.94e-06	0.000105269	0.000647553	0.00161513	2.0658	1.98403	1.83418	1.72343	1.64313
10.39	2.1e-07	2.94e-06	0.000105269	0.000647552	0.00161513	2.06082	1.97905	1.82921	1.71846	1.63815
10.4	2.1e-07	2.94e-06	0.000105268	0.000647551	0.00161513	2.05584	1.97408	1.82423	1.71349	1.63317
10.41	2.1e-07	2.94e-06	0.000105268	0.000647551	0.00161513	2.05086	1.9691	1.81925	1.70851	1.6282
10.42	2.1e-07	2.94e-06	0.000105268	0.00064755	0.00161513	2.04588	1.96412	1.81428	1.70354	1.62322
10.43	2.1e-07	2.94e-06	0.000105268	0.00064755	0.00161512	2.0409	1.95914	1.8093	1.69856	1.61824
10.44	2.1e-07	2.94e-06	0.000105268	0.000647549	0.00161512	2.03592	1.95416	1.80432	1.69359	1.61326
10.45	2.1e-07	2.94e-06	0.000105268	0.000647548	0.00161512	2.03094	1.94918	1.79935	1.68862	1.60828
10.46	2.1e-07	2.94e-06	0.000105268	0.000647548	0.00161512	2.02596	1.9442	1.79437	1.68364	1.6033
10.47	2.1e-07	2.94e-06	0.000105268	0.000647547	0.00161512	2.02099	1.93922	1.78939	1.67867	1.59832
10.48	2.1e-07	2.94e-06	0.000105268	0.000647547	0.00161512	2.01601	1.93424	1.78441	1.67369	1.59334
10.49	2.1e-07	2.94e-06	0.000105267	0.000647546	0.00161512	2.01103	1.92926	1.77944	1.66872	1.58836
10.5	2.1e-07	2.94e-06	0.000105267	0.000647546	0.00161512	2.00605	1.92428	1.77446	1.66374	1.58338
10.51	2.1e-07	2.94e-06	0.000105267	0.000647545	0.00161512	2.00107	1.9193	1.76948	1.65877	1.5784
10.52	2.1e-07	2.94e-06	0.000105267	0.000647545	0.00161511	1.99609	1.91432	1.76451	1.6538	1.57342
10.53	2.1e-07	2.94e-06	0.000105267	0.000647544	0.00161511	1.99111	1.90935	1.75953	1.64882	1.56844
10.54	2.1e-07	2.94e-06	0.000105267	0.000647544	0.00161511	1.98613	1.90437	1.75455	1.64385	1.56346
10.55	2.1e-07	2.94e-06	0.000105267	0.000647543	0.00161511	1.98115	1.89939	1.74958	1.63887	1.55848
10.56	2.1e-07	2.94e-06	0.000105267	0.000647542	0.00161511	1.97617	1.89441	1.7446	1.6339	1.5535
10.57	2.1e-07	2.94e-06	0.000105267	0.000647542	0.00161511	1.97119	1.88943	1.73962	1.62892	1.54852
10.58	2.1e-07	2.94e-06	0.000105266	0.000647542	0.00161511	1.96621	1.88445	1.73465	1.62395	1.54355
10.59	2.1e-07	2.94e-06	0.000105266	0.000647541	0.00161511	1.96123	1.87947	1.72967	1.61898	1.53857
10.6	2.1e-07	2.94e-06	0.000105266	0.000647541	0.0016151	1.95625	1.87449	1.72469	1.614	1.53359
10.61	2.1e-07	2.94e-06	0.000105266	0.00064754	0.0016151	1.95127	1.86951	1.71972	1.60903	1.52861
10.62	2.1e-07	2.94e-06	0.000105266	0.00064754	0.0016151	1.94629	1.86453	1.71474	1.60405	1.52363
10.63	2.1e-07	2.94e-06	0.000105266	0.000647539	0.0016151	1.94132	1.85955	1.70976	1.59908	1.51865
10.64	2.1e-07	2.94e-06	0.000105266	0.000647539	0.0016151	1.93634	1.85457	1.70478	1.59411	1.51367
10.65	2.1e-07	2.94e-06	0.000105266	0.000647538	0.0016151	1.93136	1.84959	1.69981	1.58913	1.50869
10.66	2.1e-07	2.94e-06	0.000105266	0.000647538	0.0016151	1.92638	1.84462	1.69483	1.58416	1.50371
10.67	2.1e-07	2.94e-06	0.000105266	0.000647537	0.0016151	1.9214	1.83964	1.68985	1.57918	1.49873
10.68	2.1e-07	2.94e-06	0.000105265	0.000647537	0.0016151	1.91642	1.83466	1.68488	1.57421	1.49375
10.69	2.1e-07	2.94e-06	0.000105265	0.000647536	0.0016151	1.91144	1.82968	1.6799	1.56923	1.48877
10.7	2.1e-07	2.94e-06	0.000105265	0.000647536	0.0016151	1.90646	1.8247	1.67492	1.56426	1.48379
10.71	2.1e-07	2.94e-06	0.000105265	0.000647536	0.00161509	1.90148	1.81972	1.66995	1.55929	1.47881
10.72	2.1e-07	2.94e-06	0.000105265	0.000647535	0.00161509	1.8965	1.81474	1.66497	1.55431	1.47383
10.73	2.1e-07	2.94e-06	0.000105265	0.000647535	0.00161509	1.89152	1.80976	1.65999	1.54934	1.46885
10.74	2.1e-07	2.94e-06	0.000105265	0.000647534	0.00161509	1.88654	1.80478	1.65502	1.54436	1.46388
10.75	2.1e-07	2.94e-06	0.000105265	0.000647534	0.00161509	1.88156	1.7998	1.65004	1.53939	1.4589
10.76	2.1e-07	2.94e-06	0.000105265	0.000647534	0.00161509	1.87658	1.79482	1.64506	1.53441	1.45392
10.77	2.1e-07	2.94e-06	0.000105265	0.000647533	0.00161509	1.8716	1.78984	1.64009	1.52944	1.44894
10.78	2.1e-07	2.94e-06	0.000105265	0.000647533	0.00161509	1.86662	1.78486	1.63511	1.52447	1.44396
10.79	2.1e-07	2.94e-06	0.000105265	0.000647532	0.00161509	1.86165	1.77989	1.63013	1.51949	1.43898
10.8	2.1e-07	2.94e-06	0.000105264	0.000647532	0.00161509	1.85667	1.77491	1.62515	1.51452	1.434
10.81	2.1e-07	2.94e-06	0.000105264	0.000647532	0.00161509	1.85169	1.76993	1.62018	1.50954	1.42902
10.82	2.1e-07	2.94e-06	0.000105264	0.000647531	0.00161509	1.84671	1.76495	1.6152	1.50457	1.42404
10.83	2.1e-07	2.94e-06	0.000105264	0.000647531	0.00161509	1.84173	1.75997	1.61022	1.4996	1.41906
10.84	2.1e-07	2.94e-06	0.000105264	0.00064753	0.00161508	1.83675	1.75499	1.60525	1.49462	1.41408
10.85	2.1e-07	2.94e-06	0.000105264	0.00064753	0.00161508	1.83177	1.75001	1.60027	1.48965	1.4091
10.86	2.1e-07	2.94e-06	0.000105264	0.00064753	0.00161508	1.82679	1.74503	1.59529	1.48467	1.40412
10.87	2.1e-07	2.94e-06	0.000105264	0.000647529	0.00161508	1.82181	1.74005	1.59032	1.4797	1.39914
10.88	2.1e-07	2.94e-06	0.000105264	0.000647529	0.00161508	1.81683	1.73507	1.58534	1.47472	1.39416
10.89	2.1e-07	2.94e-06	0.000105264	0.000647529	0.00161508	1.81185	1.73009	1.58036	1.46975	1.38918
10.9	2.1e-07	2.94e-06	0.000105264	0.000647528	0.00161508	1.80687	1.72511	1.57539	1.46478	1.3842
10.91	2.1e-07	2.94e-06	0.000105264	0.000647528	0.00161508	1.80189	1.72013	1.57041	1.4598	1.37923
10.92	2.1e-07	2.94e-06	0.000105264	0.000647528	0.00161508	1.79691	1.71516	1.56543	1.45483	1.37425
10.93	2.1e-07	2.94e-06	0.000105263	0.000647527	0.00161508	1.79193	1.71018	1.56046	1.44985	1.36927
10.94	2.1e-07	2.94e-06	0.000105263	0.000647527	0.00161508	1.78695	1.7052	1.55548	1.44488	1.36429
10.95	2.1e-07	2.94e-06	0.000105263	0.000647527	0.00161508	1.78198	1.70022	1.5505	1.4399	1.35931
10.96	2.1e-07	2.94e-06	0.000105263	0.000647526	0.00161508	1.777	1.69524	1.54552	1.43493	1.35433
10.97	2.1e-07	2.94e-06	0.000105263	0.000647526	0.00161508	1.77202	1.69026	1.54055	1.42996	1.34935
10.98	2.1e-07	2.94e-06	0.000105263	0.000647526	0.00161508	1.76704	1.68528	1.53557	1.42498	1.34437
10.99	2.1e-07	2.94e-06	0.000105263	0.000647525	0.00161507	1.76206	1.6803	1.53059	1.42001	1.33939
11	2.1e-07	2.94e-06	0.000105263	0.000647525	0.00161507	1.75708	1.67532	1.52562	1.41503	1.33441
11.01	2.1e-07	2.94e-06	0.000105263	0.000647525	0.00161507	1.7521	1.67034	1.52064	1.41006	1.32943
11.02	2.1e-07	2.94e-06	0.000105263	0.000647525	0.00161507	1.74712	1.66536	1.51566	1.40508	1.32445
11.03	2.1e-07	2.94e-06	0.000105263	0.000647524	0.00161507	1.74214	1.66038	1.51069	1.40011	1.31947
11.04	2.1e-07	2.94e-06	0.000105263	0.000647524	0.00161507	1.73716	1.6554	1.50571	1.39514	1.31449
11.05	2.1e-07	2.94e-06	0.000105263	0.000647524	0.00161507	1.73218	1.65043	1.50073	1.39016	1.30951
11.06	2.1e-07	2.94e-06	0.000105263	0.000647523	0.00161507	1.7272	1.64545	1.49576	1.38519	1.30453
11.07	2.1e-07	2.94e-06	0.000105263	0.000647523	0.00161507	1.72222	1.64047	1.49078	1.38021	1.29956
11.08	2.1e-07	2.94e-06	0.000105263	0.000647523	0.00161507	1.71724	1.63549	1.4858	1.37524	1.29458
11.09	2.1e-07	2.94e-06	0.000105262	0.000647523	0.00161507	1.71226	1.63051	1.48083	1.37027	1.2896
11.1	2.1e-07	2.94e-06	0.000105262	0.000647522	0.00161507	1.70728	1.62553	1.47585	1.36529	1.28462
11.11	2.1e-07	2.94e-06	0.000105262	0.000647522	0.00161507	1.70231	1.62055	1.47087	1.36032	1.27964
11.12	2.1e-07	2.94e-06	0.000105262	0.000647522	0.00161507	1.69733	1.61557	1.46589	1.35534	1.27466
11.13	2.1e-07	2.94e-06	0.000105262	0.000647521	0.00161507	1.69235	1.61059	1.46092	1.35037	1.26968
11.14	2.1e-07	2.94e-06	0.000105262	0.000647521	0.00161506	1.68737	1.60561	1.45594	1.34539	1.2647
11.15	2.1e-07	2.94e-06	0.000105262	0.000647521	0.00161506	1.68239	1.60063	1.45096	1.34042	1.25972
11.16	2.1e-07	2.94e-06	0.000105262	0.000647521	0.00161506	1.67741	1.59565	1.44599	1.33545	1.25474
11.17	2.1e-07	2.94e-06	0.000105262	0.00064752	0.00161506	1.67243	1.59067	1.44101	1.33047	1.24976
11.18	2.1e-07	2.94e-06	0.000105262	0.00064752	0.00161506	1.66745	1.5857	1.43603	1.3255	1.24478
11.19	2.1e-07	2.94e-06	0.000105262	0.00064752	0.00161506	1.66247	1.58072	1.43106	1.32052	1.2398
11.2	2.1e-07	2.94e-06	0.000105262	0.00064752	0.00161506	1.65749	1.57574	1.42608	1.31555	1.23482
11.21	2.1e-07	2.94e-06	0.000105262	0.000647519	0.00161506	1.65251	1.57076	1.4211	1.31057	1.22984
11.22	2.1e-07	2.94e-06	0.000105262	0.000647519	0.00161506	1.64753	1.56578	1.41613	1.3056	1.22486
11.23	2.1e-07	2.94e-06	0.000105262	0.000647519	0.00161506	1.64255	1.5608	1.41115	1.30063	1.21988
11.24	2.1e-07	2.94e-06	0.000105262	0.000647519	0.00161506	1.63757	1.55582	1.40617	1.29565	1.21491
11.25	2.1e-07	2.94e-06	0.000105262	0.000647519	0.00161506	1.63259	1.55084	1.4012	1.29068	1.20993
11.26	2.1e-07	2.94e-06	0.000105262	0.000647518	0.00161506	1.62761	1.54586	1.39622	1.2857	1.20495
11.27	2.1e-07	2.94e-06	0.000105262	0.000647518	0.00161506	1.62264	1.54088	1.39124	1.28073	1.19997
11.28	2.1e-07	2.94e-06	0.000105261	0.000647518	0.00161506	1.61766	1.5359	1.38627	1.27576	1.19499
11.29	2.1e-07	2.94e-06	0.000105261	0.000647518	0.00161506	1.61268	1.53092	1.38129	1.27078	1.19001
11.3	2.1e-07	2.94e-06	0.000105261	0.000647517	0.00161506	1.6077	1.52594	1.37631	1.26581	1.18503
11.31	2.1e-07	2.94e-06	0.000105261	0.000647517	0.00161506	1.60272	1.52097	1.37133	1.26083	1.18005
11.32	2.1e-07	2.94e-06	0.000105261	0.000647517	0.00161506	1.59774	1.51599	1.36636	1.25586	1.17507
11.33	2.1e-07	2.94e-06	0.000105261	0.000647517	0.00161506	1.59276	1.51101	1.36138	1.25088	1.17009
11.34	2.1e-07	2.94e-06	0.000105261	0.000647517	0.00161506	1.58778	1.50603	1.3564	1.24591	1.16511
11.35	2.1e-07	2.94e-06	0.000105261	0.000647516	0.00161506	1.5828	1.50105	1.35143	1.24094	1.16013
11.36	2.1e-07	2.94e-06	0.000105261	0.000647516	0.00161506	1.57782	1.49607	1.34645	1.23596	1.15515
11.37	2.1e-07	2.94e-06	0.000105261	0.000647516	0.00161505	1.57284	1.49109	1.34147	1.23099	1.15017
11.38	2.1e-07	2.94e-06	0.000105261	0.000647516	0.00161505	1.56786	1.48611	1.3365	1.22601	1.14519
11.39	2.1e-07	2.94e-06	0.000105261	0.000647516	0.00161505	1.56288	1.48113	1.33152	1.22104	1.14021
11.4	2.1e-07	2.94e-06	0.000105261	0.000647515	0.00161505	1.5579	1.47615	1.32654	1.21606	1.13524
11.41	2.1e-07	2.94e-06	0.000105261	0.000647515	0.00161505	1.55292	1.47117	1.32157	1.21109	1.13026
11.42	2.1e-07	2.94e-06	0.000105261	0.000647515	0.00161505	1.54794	1.46619	1.31659	1.20612	1.12528
11.43	2.1e-07	2.94e-06	0.000105261	0.000647515	0.00161505	1.54297	1.46121	1.31161	1.20114	1.1203
11.44	2.1e-07	2.94e-06	0.000105261	0.000647515	0.00161505	1.53799	1.45624	1.30664	1.19617	1.11532
11.45	2.1e-07	2.94e-06	0.000105261	0.000647514	0.00161505	1.53301	1.45126	1.30166	1.19119	1.11034
11.46	2.1e-07	2.94e-06	0.000105261	0.000647514	0.00161505	1.52803	1.44628	1.29668	1.18622	1.10536
11.47	2.1e-07	2.94e-06	0.000105261	0.000647514	0.00161505	1.52305	1.4413	1.2917	1.18125	1.10038
11.48	2.1e-07	2.94e-06	0.000105261	0.000647514	0.00161505	1.51807	1.43632	1.28673	1.17627	1.0954
11.49	2.1e-07	2.94e-06	0.000105261	0.000647514	0.00161505	1.51309	1.43134	1.28175	1.1713	1.09042
11.5	2.1e-07	2.94e-06	0.000105261	0.000647514	0.00161505	1.50811	1.42636	1.27677	1.16632	1.08544
11.51	2.1e-07	2.94e-06	0.000105261	0.000647513	0.00161505	1.50313	1.42138	1.2718	1.16135	1.08046
11.52	2.1e-07	2.94e-06	0.000105261	0.000647513	0.00161505	1.49815	1.4164	1.26682	1.15637	1.07548
11.53	2.1e-07	2.94e-06	0.00010526	0.000647513	0.00161505	1.49317	1.41142	1.26184	1.1514	1.0705
11.54	2.1e-07	2.94e-06	0.00010526	0.000647513	0.00161505	1.48819	1.40644	1.25687	1.14643	1.06552
11.55	2.1e-07	2.94e-06	0.00010526	0.000647513	0.00161505	1.48321	1.40146	1.25189	1.14145	1.06054
11.56	2.1e-07	2.94e-06	0.00010526	0.000647513	0.00161505	1.47823	1.39648	1.24691	1.13648	1.05556
11.57	2.1e-07	2.94e-06	0.00010526	0.000647512	0.00161505	1.47325	1.39151	1.24194	1.1315	1.05059
11.58	2.1e-07	2.94e-06	0.00010526	0.000647512	0.00161505	1.46827	1.38653	1.23696	1.12653	1.04561
11.59	2.1e-07	2.94e-06	0.00010526	0.000647512	0.00161505	1.4633	1.38155	1.23198	1.12155	1.04063
11.6	2.1e-07	2.94e-06	0.00010526	0.000647512	0.00161505	1.45832	1.37657	1.22701	1.11658	1.03565
11.61	2.1e-07	2.94e-06	0.00010526	0.000647512	0.00161505	1.45334	1.37159	1.22203	1.11161	1.03067
11.62	2.1e-07	2.94e-06	0.00010526	0.000647512	0.00161505	1.44836	1.36661	1.21705	1.10663	1.02569
11.63	2.1e-07	2.94e-06	0.00010526	0.000647512	0.00161505	1.44338	1.36163	1.21207	1.10166	1.02071
11.64	2.1e-07	2.94e-06	0.00010526	0.000647511	0.00161505	1.4384	1.35665	1.2071	1.09668	1.01573
11.65	2.1e-07	2.94e-06	0.00010526	0.000647511	0.00161505	1.43342	1.35167	1.20212	1.09171	1.01075
11.66	2.1e-07	2.94e-06	0.00010526	0.000647511	0.00161504	1.42844	1.34669	1.19714	1.08674	1.00577
11.67	2.1e-07	2.94e-06	0.00010526	0.000647511	0.00161504	1.42346	1.34171	1.19217	1.08176	1.00079
11.68	2.1e-07	2.94e-06	0.00010526	0.000647511	0.00161504	1.41848	1.33673	1.18719	1.07679	0.995812
11.69	2.1e-07	2.94e-06	0.00010526	0.000647511	0.00161504	1.4135	1.33175	1.18221	1.07181	0.990833
11.7	2.1e-07	2.94e-06	0.00010526	0.000647511	0.00161504	1.40852	1.32678	1.17724	1.06684	0.985853
11.71	2.1e-07	2.94e-06	0.00010526	0.00064751	0.00161504	1.40354	1.3218	1.17226	1.06186	0.980874
11.72	2.1e-07	2.94e-06	0.00010526	0.00064751	0.00161504	1.39856	1.31682	1.16728	1.05689	0.975895
11.73	2.1e-07	2.94e-06	0.00010526	0.00064751	0.00161504	1.39358	1.31184	1.16231	1.05192	0.970915
11.74	2.1e-07	2.94e-06	0.00010526	0.00064751	0.00161504	1.3886	1.30686	1.15733	1.04694	0.965936
11.75	2.1e-07	2.94e-06	0.00010526	0.00064751	0.00161504	1.38363	1.30188	1.15235	1.04197	0.960956
11.76	2.1e-07	2.94e-06	0.00010526	0.00064751	0.00161504	1.37865	1.2969	1.14738	1.03699	0.955977
11.77	2.1e-07	2.94e-06	0.00010526	0.00064751	0.00161504	1.37367	1.29192	1.1424	1.03202	0.950998
11.78	2.1e-07	2.94e-06	0.00010526	0.00064751	0.00161504	1.36869	1.28694	1.13742	1.02704	0.946018
11.79	2.1e-07	2.94e-06	0.00010526	0.000647509	0.00161504	1.36371	1.28196	1.13244	1.02207	0.941039
11.8	2.1e-07	2.94e-06	0.00010526	0.000647509	0.00161504	1.35873	1.27698	1.12747	1.0171	0.936059
11.81	2.1e-07	2.94e-06	0.00010526	0.000647509	0.00161504	1.35375	1.272	1.12249	1.01212	0.93108
11.82	2.1e-07	2.94e-06	0.00010526	0.000647509	0.00161504	1.34877	1.26702	1.11751	1.00715	0.926101
11.83	2.1e-07	2.94e-06	0.00010526	0.000647509	0.00161504	1.34379	1.26205	1.11254	1.00217	0.921121
11.84	2.1e-07	2.94e-06	0.00010526	0.000647509	0.00161504	1.33881	1.25707	1.10756	0.997199	0.916142
11.85	2.1e-07	2.94e-06	0.00010526	0.000647509	0.00161504	1.33383	1.25209	1.10258	0.992225	0.911162
11.86	2.1e-07	2.94e-06	0.00010526	0.000647509	0.00161504	1.32885	1.24711	1.09761	0.987251	0.906183
11.87	2.1e-07	2.94e-06	0.00010526	0.000647508	0.00161504	1.32387	1.24213	1.09263	0.982276	0.901204
11.88	2.1e-07	2.94e-06	0.000105259	0.000647508	0.00161504	1.31889	1.23715	1.08765	0.977302	0.896224
11.89	2.1e-07	2.94e-06	0.000105259	0.000647508	0.00161504	1.31391	1.23217	1.08268	0.972328	0.891245
11.9	2.1e-07	2.94e-06	0.000105259	0.000647508	0.00161504	1.30893	1.22719	1.0777	0.967354	0.886265
11.91	2.1e-07	2.94e-06	0.000105259	0.000647508	0.00161504	1.30396	1.22221	1.07272	0.96238	0.881286
11.92	2.1e-07	2.94e-06	0.000105259	0.000647508	0.00161504	1.29898	1.21723	1.06775	0.957405	0.876307
11.93	2.1e-07	2.94e-06	0.000105259	0.000647508	0.00161504	1.294	1.21225	1.06277	0.952431	0.871327
11.94	2.1e-07	2.94e-06	0.000105259	0.000647508	0.00161504	1.28902	1.20727	1.05779	0.947457	0.866348
11.95	2.1e-07	2.94e-06	0.000105259	0.000647508	0.00161504	1.28404	1.20229	1.05281	0.942483	0.861368
11.96	2.1e-07	2.94e-06	0.000105259	0.000647507	0.00161504	1.27906	1.19732	1.04784	0.937509	0.856389
11.97	2.1e-07	2.94e-06	0.000105259	0.000647507	0.00161504	1.27408	1.19234	1.04286	0.932534	0.85141
11.98	2.1e-07	2.94e-06	0.000105259	0.000647507	0.00161504	1.2691	1.18736	1.03788	0.92756	0.84643
11.99	2.1e-07	2.94e-06	0.000105259	0.000647507	0.00161504	1.26412	1.18238	1.03291	0.922586	0.841451
12	2.1e-07	2.94e-06	0.000105259	0.000647507	0.00161504	1.25914	1.1774	1.02793	0.917612	0.836471
12.01	2.1e-07	2.94e-06	0.000105259	0.000647507	0.00161504	1.25416	1.17242	1.02295	0.912637	0.831492
12.02	2.1e-07	2.94e-06	0.000105259	0.000647507	0.00161504	1.24918	1.16744	1.01798	0.907663	0.826513
12.03	2.1e-07	2.94e-06	0.000105259	0.000647507	0.00161503	1.2442	1.16246	1.013	0.902689	0.821533
12.04	2.1e-07	2.94e-06	0.000105259	0.000647507	0.00161503	1.23922	1.15748	1.00802	0.897715	0.816554
12.05	2.1e-07	2.94e-06	0.000105259	0.000647507	0.00161503	1.23424	1.1525	1.00305	0.892741	0.811575
12.06	2.1e-07	2.94e-06	0.000105259	0.000647507	0.00161503	1.22926	1.14752	0.998069	0.887766	0.806595
12.07	2.1e-07	2.94e-06	0.000105259	0.000647506	0.00161503	1.22429	1.14254	0.993092	0.882792	0.801616
12.08	2.1e-07	2.94e-06	0.000105259	0.000647506	0.00161503	1.21931	1.13756	0.988116	0.877818	0.796636
12.09	2.1e-07	2.94e-06	0.000105259	0.000647506	0.00161503	1.21433	1.13259	0.983139	0.872844	0.791657
12.1	2.1e-07	2.94e-06	0.000105259	0.000647506	0.00161503	1.20935	1.12761	0.978162	0.867869	0.786678
12.11	2.1e-07	2.94e-06	0.000105259	0.000647506	0.00161503	1.20437	1.12263	0.973185	0.862895	0.781698
12.12	2.1e-07	2.94e-06	0.000105259	0.000647506	0.00161503	1.19939	1.11765	0.968208	0.857921	0.776719
12.13	2.1e-07	2.94e-06	0.000105259	0.000647506	0.00161503	1.19441	1.11267	0.963231	0.852947	0.771739
12.14	2.1e-07	2.94e-06	0.000105259	0.000647506	0.00161503	1.18943	1.10769	0.958254	0.847973	0.76676
12.15	2.1e-07	2.94e-06	0.000105259	0.000647506	0.00161503	1.18445	1.10271	0.953277	0.842998	0.761781
12.16	2.1e-07	2.94e-06	0.000105259	0.000647506	0.00161503	1.17947	1.09773	0.948301	0.838024	0.756801
12.17	2.1e-07	2.94e-06	0.000105259	0.000647506	0.00161503	1.17449	1.09275	0.943324	0.83305	0.751822
12.18	2.1e-07	2.94e-06	0.000105259	0.000647506	0.00161503	1.16951	1.08777	0.938347	0.828076	0.746842
12.19	2.1e-07	2.94e-06	0.000105259	0.000647505	0.00161503	1.16453	1.08279	0.93337	0.823102	0.741863
12.2	2.1e-07	2.94e-06	0.000105259	0.000647505	0.00161503	1.15955	1.07781	0.928393	0.818127	0.736884
12.21	2.1e-07	2.94e-06	0.000105259	0.000647505	0.00161503	1.15457	1.07283	0.923416	0.813153	0.731904
12.22	2.1e-07	2.94e-06	0.000105259	0.000647505	0.00161503	1.14959	1.06786	0.918439	0.808179	0.726925
12.23	2.1e-07	2.94e-06	0.000105259	0.000647505	0.00161503	1.14461	1.06288	0.913462	0.803205	0.721945
12.24	2.1e-07	2.94e-06	0.000105259	0.000647505	0.00161503	1.13964	1.0579	0.908486	0.79823	0.716966
12.25	2.1e-07	2.94e-06	0.000105259	0.000647505	0.00161503	1.13466	1.05292	0.903509	0.793256	0.711987
12.26	2.1e-07	2.94e-06	0.000105259	0.000647505	0.00161503	1.12968	1.04794	0.898532	0.788282	0.707007
12.27	2.1e-07	2.94e-06	0.000105259	0.000647505	0.00161503	1.1247	1.04296	0.893555	0.783308	0.702028
12.28	2.1e-07	2.94e-06	0.000105259	0.000647505	0.00161503	1.11972	1.03798	0.888578	0.778334	0.697048
12.29	2.1e-07	2.94e-06	0.000105259	0.000647505	0.00161503	1.11474	1.033	0.883601	0.773359	0.692069
12.3	2.1e-07	2.94e-06	0.000105259	0.000647505	0.00161503	1.10976	1.02802	0.878624	0.768385	0.68709
12.31	2.1e-07	2.94e-06	0.000105259	0.000647505	0.00161503	1.10478	1.02304	0.873648	0.763411	0.68211
12.32	2.1e-07	2.94e-06	0.000105259	0.000647505	0.00161503	1.0998	1.01806	0.868671	0.758437	0.677131
12.33	2.1e-07	2.94e-06	0.000105259	0.000647504	0.00161503	1.09482	1.01308	0.863694	0.753463	0.672151
12.34	2.1e-07	2.94e-06	0.000105259	0.000647504	0.00161503	1.08984	1.0081	0.858717	0.748488	0.667172
12.35	2.1e-07	2.94e-06	0.000105259	0.000647504	0.00161503	1.08486	1.00313	0.85374	0.743514	0.662193
12.36	2.1e-07	2.94e-06	0.000105259	0.000647504	0.00161503	1.07988	0.998146	0.848763	0.73854	0.657213
12.37	2.1e-07	2.94e-06	0.000105259	0.000647504	0.00161503	1.0749	0.993167	0.843786	0.733566	0.652234
12.38	2.1e-07	2.94e-06	0.000105259	0.000647504	0.00161503	1.06992	0.988188	0.838809	0.728591	0.647255
12.39	2.1e-07	2.94e-06	0.000105259	0.000647504	0.00161503	1.06494	0.983209	0.833833	0.723617	0.642275
12.4	2.1e-07	2.94e-06	0.000105259	0.000647504	0.00161503	1.05997	0.978229	0.828856	0.718643	0.637296
12.41	2.1e-07	2.94e-06	0.000105259	0.000647504	0.00161503	1.05499	0.97325	0.823879	0.713669	0.632316
12.42	2.1e-07	2.94e-06	0.000105259	0.000647504	0.00161503	1.05001	0.968271	0.818902	0.708695	0.627337
12.43	2.1e-07	2.94e-06	0.000105259	0.000647504	0.00161503	1.04503	0.963292	0.813925	0.70372	0.622358
12.44	2.1e-07	2.94e-06	0.000105259	0.000647504	0.00161503	1.04005	0.958313	0.808948	0.698746	0.617378
12.45	2.1e-07	2.94e-06	0.000105259	0.000647504	0.00161503	1.03507	0.953333	0.803971	0.693772	0.612399
12.46	2.1e-07	2.94e-06	0.000105259	0.000647504	0.00161503	1.03009	0.948354	0.798995	0.688798	0.607419
12.47	2.1e-07	2.94e-06	0.000105258	0.000647504	0.00161503	1.02511	0.943375	0.794018	0.683823	0.60244
12.48	2.1e-07	2.94e-06	0.000105258	0.000647504	0.00161503	1.02013	0.938396	0.789041	0.678849	0.597461
12.49	2.1e-07	2.94e-06	0.000105258	0.000647503	0.00161503	1.01515	0.933416	0.784064	0.673875	0.592481
12.5	2.1e-07	2.94e-06	0.000105258	0.000647503	0.00161503	1.01017	0.928437	0.779087	0.668901	0.587502
12.51	2.1e-07	2.94e-06	0.000105258	0.000647503	0.00161503	1.00519	0.923458	0.77411	0.663927	0.582522
12.52	2.1e-07	2.94e-06	0.000105258	0.000647503	0.00161503	1.00021	0.918479	0.769133	0.658952	0.577543
12.53	2.1e-07	2.94e-06	0.000105258	0.000647503	0.00161503	0.995234	0.913499	0.764156	0.653978	0.572564
12.54	2.1e-07	2.94e-06	0.000105258	0.000647503	0.00161503	0.990254	0.90852	0.75918	0.649004	0.567584
12.55	2.1e-07	2.94e-06	0.000105258	0.000647503	0.00161503	0.985275	0.903541	0.754203	0.64403	0.562605
12.56	2.1e-07	2.94e-06	0.000105258	0.000647503	0.00161503	0.980296	0.898562	0.749226	0.639056	0.557625
12.57	2.1e-07	2.94e-06	0.000105258	0.000647503	0.00161503	0.975316	0.893583	0.744249	0.634081	0.552646
12.58	2.1e-07	2.94e-06	0.000105258	0.000647503	0.00161503	0.970337	0.888603	0.739272	0.629107	0.547667
12.59	2.1e-07	2.94e-06	0.000105258	0.000647503	0.00161503	0.965357	0.883624	0.734295	0.624133	0.542687
12.6	2.1e-07	2.94e-06	0.000105258	0.000647503	0.00161503	0.960378	0.878645	0.729318	0.619159	0.537708
12.61	2.1e-07	2.94e-06	0.000105258	0.000647503	0.00161503	0.955399	0.873666	0.724341	0.614184	0.532728
12.62	2.1e-07	2.94e-06	0.000105258	0.000647503	0.00161503	0.950419	0.868686	0.719365	0.60921	0.527749
12.63	2.1e-07	2.94e-06	0.000105258	0.000647503	0.00161503	0.94544	0.863707	0.714388	0.604236	0.52277
12.64	2.1e-07	2.94e-06	0.000105258	0.000647503	0.00161503	0.940461	0.858728	0.709411	0.599262	0.51779
12.65	2.1e-07	2.94e-06	0.000105258	0.000647503	0.00161503	0.935481	0.853749	0.704434	0.594288	0.512811
12.66	2.1e-07	2.94e-06	0.000105258	0.000647503	0.00161503	0.930502	0.848769	0.699457	0.589313	0.507831
12.67	2.1e-07	2.94e-06	0.000105258	0.000647503	0.00161503	0.925522	0.84379	0.69448	0.584339	0.502852
12.68	2.1e-07	2.94e-06	0.000105258	0.000647503	0.00161503	0.920543	0.838811	0.689503	0.579365	0.497873
12.69	2.1e-07	2.94e-06	0.000105258	0.000647503	0.00161503	0.915564	0.833832	0.684527	0.574391	0.492893
12.7	2.1e-07	2.94e-06	0.000105258	0.000647502	0.00161503	0.910584	0.828853	0.67955	0.569416	0.487914
12.71	2.1e-07	2.94e-06	0.000105258	0.000647502	0.00161503	0.905605	0.823873	0.674573	0.564442	0.482935
12.72	2.1e-07	2.94e-06	0.000105258	0.000647502	0.00161503	0.900625	0.818894	0.669596	0.559468	0.477955
12.73	2.1e-07	2.94e-06	0.000105258	0.000647502	0.00161503	0.895646	0.813915	0.664619	0.554494	0.472976
12.74	2.1e-07	2.94e-06	0.000105258	0.000647502	0.00161503	0.890667	0.808936	0.659642	0.54952	0.467996
12.75	2.1e-07	2.94e-06	0.000105258	0.000647502	0.00161503	0.885687	0.803956	0.654665	0.544545	0.463017
12.76	2.1e-07	2.94e-06	0.000105258	0.000647502	0.00161503	0.880708	0.798977	0.649688	0.539571	0.458038
12.77	2.1e-07	2.94e-06	0.000105258	0.000647502	0.00161503	0.875729	0.793998	0.644712	0.534597	0.453058
12.78	2.1e-07	2.94e-06	0.000105258	0.000647502	0.00161503	0.870749	0.789019	0.639735	0.529623	0.448079
12.79	2.1e-07	2.94e-06	0.000105258	0.000647502	0.00161503	0.86577	0.784039	0.634758	0.524649	0.443099
12.8	2.1e-07	2.94e-06	0.000105258	0.000647502	0.00161503	0.86079	0.77906	0.629781	0.519674	0.43812
12.81	2.1e-07	2.94e-06	0.000105258	0.000647502	0.00161502	0.855811	0.774081	0.624804	0.5147	0.433141
12.82	2.1e-07	2.94e-06	0.000105258	0.000647502	0.00161502	0.850832	0.769102	0.619827	0.509726	0.428161
12.83	2.1e-07	2.94e-06	0.000105258	0.000647502	0.00161502	0.845852	0.764123	0.61485	0.504752	0.423182
12.84	2.1e-07	2.94e-06	0.000105258	0.000647502	0.00161502	0.840873	0.759143	0.609873	0.499777	0.418202
12.85	2.1e-07	2.94e-06	0.000105258	0.000647502	0.00161502	0.835894	0.754164	0.604897	0.494803	0.413223
12.86	2.1e-07	2.94e-06	0.000105258	0.000647502	0.00161502	0.830914	0.749185	0.59992	0.489829	0.408244
12.87	2.1e-07	2.94e-06	0.000105258	0.000647502	0.00161502	0.825935	0.744206	0.594943	0.484855	0.403264
12.88	2.1e-07	2.94e-06	0.000105258	0.000647502	0.00161502	0.820955	0.739226	0.589966	0.479881	0.398285
12.89	2.1e-07	2.94e-06	0.000105258	0.000647502	0.00161502	0.815976	0.734247	0.584989	0.474906	0.393305
12.9	2.1e-07	2.94e-06	0.000105258	0.000647502	0.00161502	0.810997	0.729268	0.580012	0.469932	0.388326
12.91	2.1e-07	2.94e-06	0.000105258	0.000647502	0.00161502	0.806017	0.724289	0.575035	0.464958	0.383347
12.92	2.1e-07	2.94e-06	0.000105258	0.000647502	0.00161502	0.801038	0.71931	0.570059	0.459984	0.378367
12.93	2.1e-07	2.94e-06	0.000105258	0.000647502	0.00161502	0.796059	0.71433	0.565082	0.455009	0.373388
12.94	2.1e-07	2.94e-06	0.000105258	0.000647502	0.00161502	0.791079	0.709351	0.560105	0.450035	0.368408
12.95	2.1e-07	2.94e-06	0.000105258	0.000647502	0.00161502	0.7861	0.704372	0.555128	0.445061	0.363429
12.96	2.1e-07	2.94e-06	0.000105258	0.000647501	0.00161502	0.78112	0.699393	0.550151	0.440087	0.35845
12.97	2.1e-07	2.94e-06	0.000105258	0.000647501	0.00161502	0.776141	0.694413	0.545174	0.435113	0.35347
12.98	2.1e-07	2.94e-06	0.000105258	0.000647501	0.00161502	0.771162	0.689434	0.540197	0.430138	0.348491
12.99	2.1e-07	2.94e-06	0.000105258	0.000647501	0.00161502	0.766182	0.684455	0.53522	0.425164	0.343511
13	2.1e-07	2.94e-06	0.000105258	0.000647501	0.00161502	0.761203	0.679476	0.530244	0.42019	0.338532
13.01	2.1e-07	2.94e-06	0.000105258	0.000647501	0.00161502	0.756224	0.674496	0.525267	0.415216	0.333553
13.02	2.1e-07	2.94e-06	0.000105258	0.000647501	0.00161502	0.751244	0.669517	0.52029	0.410242	0.328573
13.03	2.1e-07	2.94e-06	0.000105258	0.000647501	0.00161502	0.746265	0.664538	0.515313	0.405267	0.323594
13.04	2.1e-07	2.94e-06	0.000105258	0.000647501	0.00161502	0.741285	0.659559	0.510336	0.400293	0.318615
13.05	2.1e-07	2.94e-06	0.000105258	0.000647501	0.00161502	0.736306	0.65458	0.505359	0.395319	0.313635
13.06	2.1e-07	2.94e-06	0.000105258	0.000647501	0.00161502	0.731327	0.6496	0.500382	0.390345	0.308656
13.07	2.1e-07	2.94e-06	0.000105258	0.000647501	0.00161502	0.726347	0.644621	0.495405	0.38537	0.303676
13.08	2.1e-07	2.94e-06	0.000105258	0.000647501	0.00161502	0.721368	0.639642	0.490429	0.380396	0.298697
13.09	2.1e-07	2.94e-06	0.000105258	0.000647501	0.00161502	0.716389	0.634663	0.485452	0.375422	0.293718
13.1	2.1e-07	2.94e-06	0.000105258	0.000647501	0.00161502	0.711409	0.629683	0.480475	0.370448	0.288738
13.11	2.1e-07	2.94e-06	0.000105258	0.000647501	0.00161502	0.70643	0.624704	0.475498	0.365474	0.283759
13.12	2.1e-07	2.94e-06	0.000105258	0.000647501	0.00161502	0.70145	0.619725	0.470521	0.360499	0.278779
13.13	2.1e-07	2.94e-06	0.000105258	0.000647501	0.00161502	0.696471	0.614746	0.465544	0.355525	0.2738
13.14	2.1e-07	2.94e-06	0.000105258	0.000647501	0.00161502	0.691492	0.609766	0.460567	0.350551	0.268821
13.15	2.1e-07	2.94e-06	0.000105258	0.000647501	0.00161502	0.686512	0.604787	0.455591	0.345577	0.263841
13.16	2.1e-07	2.94e-06	0.000105258	0.000647501	0.00161502	0.681533	0.599808	0.450614	0.340602	0.258862
13.17	2.1e-07	2.94e-06	0.000105258	0.000647501	0.00161502	0.676554	0.594829	0.445637	0.335628	0.253882
13.18	2.1e-07	2.94e-06	0.000105258	0.000647501	0.00161502	0.671574	0.58985	0.44066	0.330654	0.248903
13.19	2.1e-07	2.94e-06	0.000105258	0.000647501	0.00161502	0.666595	0.58487	0.435683	0.32568	0.243924
13.2	2.1e-07	2.94e-06	0.000105258	0.000647501	0.00161502	0.661615	0.579891	0.430706	0.320706	0.238944
13.21	2.1e-07	2.94e-06	0.000105258	0.000647501	0.00161502	0.656636	0.574912	0.425729	0.315731	0.233965
13.22	2.1e-07	2.94e-06	0.000105258	0.000647501	0.00161502	0.651657	0.569933	0.420752	0.310757	0.228985
13.23	2.1e-07	2.94e-06	0.000105258	0.000647501	0.00161502	0.646677	0.564953	0.415776	0.305783	0.224006
13.24	2.1e-07	2.94e-06	0.000105258	0.000647501	0.00161502	0.641698	0.559974	0.410799	0.300809	0.219027
13.25	2.1e-07	2.94e-06	0.000105258	0.000647501	0.00161502	0.636719	0.554995	0.405822	0.295835	0.214047
13.26	2.1e-07	2.94e-06	0.000105258	0.000647501	0.00161502	0.631739	0.550016	0.400845	0.29086	0.209068
13.27	2.1e-07	2.94e-06	0.000105258	0.000647501	0.00161502	0.62676	0.545036	0.395868	0.285886	0.204088
13.28	2.1e-07	2.94e-06	0.000105258	0.000647501	0.00161502	0.62178	0.540057	0.390891	0.280912	0.199109
13.29	2.1e-07	2.94e-06	0.000105258	0.000647501	0.00161502	0.616801	0.535078	0.385914	0.275938	0.19413
13.3	2.1e-07	2.94e-06	0.000105258	0.000647501	0.00161502	0.611822	0.530099	0.380937	0.270963	0.18915
13.31	2.1e-07	2.94e-06	0.000105258	0.000647501	0.00161502	0.606842	0.52512	0.375961	0.265989	0.184171
13.32	2.1e-07	2.94e-06	0.000105258	0.000647501	0.00161502	0.601863	0.52014	0.370984	0.261015	0.179191
13.33	2.1e-07	2.94e-06	0.000105258	0.000647501	0.00161502	0.596883	0.515161	0.366007	0.256041	0.174212
13.34	2.1e-07	2.94e-06	0.000105258	0.000647501	0.00161502	0.591904	0.510182	0.36103	0.251067	0.169233
13.35	2.1e-07	2.94e-06	0.000105258	0.0006475	0.00161502	0.586925	0.505203	0.356053	0.246092	0.164253
13.36	2.1e-07	2.94e-06	0.000105258	0.0006475	0.00161502	0.581945	0.500223	0.351076	0.241118	0.159274
13.37	2.1e-07	2.94e-06	0.000105258	0.0006475	0.00161502	0.576966	0.495244	0.346099	0.236144	0.154295
13.38	2.1e-07	2.94e-06	0.000105258	0.0006475	0.00161502	0.571987	0.490265	0.341123	0.23117	0.149315
13.39	2.1e-07	2.94e-06	0.000105258	0.0006475	0.00161502	0.567007	0.485286	0.336146	0.226196	0.144336
13.4	2.1e-07	2.94e-06	0.000105258	0.0006475	0.00161502	0.562028	0.480306	0.331169	0.221221	0.139356
13.41	2.1e-07	2.94e-06	0.000105258	0.0006475	0.00161502	0.557048	0.475327	0.326192	0.216247	0.134377
13.42	2.1e-07	2.94e-06	0.000105258	0.0006475	0.00161502	0.552069	0.470348	0.321215	0.211273	0.129398
13.43	2.1e-07	2.94e-06	0.000105258	0.0006475	0.00161502	0.54709	0.465369	0.316238	0.206299	0.124418
13.44	2.1e-07	2.94e-06	0.000105258	0.0006475	0.00161502	0.54211	0.46039	0.311261	0.201324	0.119439
13.45	2.1e-07	2.94e-06	0.000105258	0.0006475	0.00161502	0.537131	0.45541	0.306284	0.19635	0.114459
13.46	2.1e-07	2.94e-06	0.000105258	0.0006475	0.00161502	0.532152	0.450431	0.301308	0.191376	0.10948
13.47	2.1e-07	2.94e-06	0.000105258	0.0006475	0.00161502	0.527172	0.445452	0.296331	0.186402	0.104501
13.48	2.1e-07	2.94e-06	0.000105258	0.0006475	0.00161502	0.522193	0.440473	0.291354	0.181428	0.0995212
13.49	2.1e-07	2.94e-06	0.000105258	0.0006475	0.00161502	0.517213	0.435493	0.286377	0.176453	0.0945418
13.5	2.1e-07	2.94e-06	0.000105258	0.0006475	0.00161502	0.512234	0.430514	0.2814	0.171479	0.0895624
13.51	2.1e-07	2.94e-06	0.000105258	0.0006475	0.00161502	0.507255	0.425535	0.276423	0.166505	0.084583
13.52	2.1e-07	2.94e-06	0.000105258	0.0006475	0.00161502	0.502275	0.420556	0.271446	0.161531	0.0796036
13.53	2.1e-07	2.94e-06	0.000105258	0.0006475	0.00161502	0.497296	0.415577	0.26647	0.156556	0.0746242
13.54	2.1e-07	2.94e-06	0.000105258	0.0006475	0.00161502	0.492317	0.410597	0.261493	0.151582	0.0696448
13.55	2.1e-07	2.94e-06	0.000105258	0.0006475	0.00161502	0.487337	0.405618	0.256516	0.146608	0.0646654
13.56	2.1e-07	2.94e-06	0.000105258	0.0006475	0.00161502	0.482358	0.400639	0.251539	0.141634	0.059686
13.57	2.1e-07	2.94e-06	0.000105258	0.0006475	0.00161502	0.477378	0.39566	0.246562	0.13666	0.0547066
13.58	2.1e-07	2.94e-06	0.000105258	0.0006475	0.00161502	0.472399	0.39068	0.241585	0.131685	0.0497272
13.59	2.1e-07	2.94e-06	0.000105258	0.0006475	0.00161502	0.46742	0.385701	0.236608	0.126711	0.0447479
13.6	2.1e-07	2.94e-06	0.000105258	0.0006475	0.00161502	0.46244	0.380722	0.231631	0.121737	0.0397685
13.61	2.1e-07	2.94e-06	0.000105258	0.0006475	0.00161502	0.457461	0.375743	0.226655	0.116763	0.0347891
13.62	2.1e-07	2.94e-06	0.000105258	0.0006475	0.00161502	0.452482	0.370763	0.221678	0.111789	0.0298097
13.63	2.1e-07	2.94e-06	0.000105258	0.0006475	0.00161502	0.447502	0.365784	0.216701	0.106814	0.0248303
13.64	2.1e-07	2.94e-06	0.000105258	0.0006475	0.00161502	0.442523	0.360805	0.211724	0.10184	0.0198509
13.65	2.1e-07	2.94e-06	0.000105258	0.0006475	0.00161502	0.437543	0.355826	0.206747	0.0968659	0.0148715
13.66	2.1e-07	2.94e-06	0.000105258	0.0006475	0.00161502	0.432564	0.350847	0.20177	0.0918917	0.0098921
13.67	2.1e-07	2.94e-06	0.000105258	0.0006475	0.00161502	0.427585	0.345867	0.196793	0.0869174	0.0049127
13.68	2.1e-07	2.94e-06	0.000105258	0.0006475	0.00161502	0.422605	0.340888	0.191816	0.0819432	-6.67e-05
13.69	2.1e-07	2.94e-06	0.000105258	0.0006475	0.00161502	0.417626	0.335909	0.18684	0.076969	-0.00504609
13.7	2.1e-07	2.94e-06	0.000105258	0.0006475	0.00161502	0.412647	0.33093	0.181863	0.0719948	-0.0100255
13.71	2.1e-07	2.94e-06	0.000105258	0.0006475	0.00161502	0.407667	0.32595	0.176886	0.0670206	-0.0150049
13.72	2.1e-07	2.94e-06	0.000105258	0.0006475	0.00161502	0.402688	0.320971	0.171909	0.0620463	-0.0199843
13.73	2.1e-07	2.94e-06	0.000105258	0.0006475	0.00161502	0.397708	0.315992	0.166932	0.0570721	-0.0249637
13.74	2.1e-07	2.94e-06	0.000105258	0.0006475	0.00161502	0.392729	0.311013	0.161955	0.0520979	-0.0299431
13.75	2.1e-07	2.94e-06	0.000105258	0.0006475	0.00161502	0.38775	0.306033	0.156978	0.0471237	-0.0349224
13.76	2.1e-07	2.94e-06	0.000105258	0.0006475	0.00161502	0.38277	0.301054	0.152002	0.0421495	-0.0399018
13.77	2.1e-07	2.94e-06	0.000105258	0.0006475	0.00161502	0.377791	0.296075	0.147025	0.0371753	-0.0448812
13.78	2.1e-07	2.94e-06	0.000105258	0.0006475	0.00161502	0.372812	0.291096	0.142048	0.032201	-0.0498606
13.79	2.1e-07	2.94e-06	0.000105258	0.0006475	0.00161502	0.367832	0.286117	0.137071	0.0272268	-0.05484
13.8	2.1e-07	2.94e-06	0.000105258	0.0006475	0.00161502	0.362853	0.281137	0.132094	0.0222526	-0.0598194
13.81	2.1e-07	2.94e-06	0.000105258	0.0006475	0.00161502	0.357873	0.276158	0.127117	0.0172784	-0.0647988
13.82	2.1e-07	2.94e-06	0.000105258	0.0006475	0.00161502	0.352894	0.271179	0.12214	0.0123042	-0.0697782
13.83	2.1e-07	2.94e-06	0.000105258	0.0006475	0.00161502	0.347915	0.2662	0.117163	0.00732996	-0.0747576
13.84	2.1e-07	2.94e-06	0.000105258	0.0006475	0.00161502	0.342935	0.26122	0.112187	0.00235575	-0.079737
13.85	2.1e-07	2.94e-06	0.000105258	0.0006475	0.00161502	0.337956	0.256241	0.10721	-0.00261847	-0.0847164
13.86	2.1e-07	2.94e-06	0.000105258	0.0006475	0.00161502	0.332977	0.251262	0.102233	-0.00759269	-0.0896958
13.87	2.1e-07	2.94e-06	0.000105258	0.0006475	0.00161502	0.327997	0.246283	0.0972559	-0.0125669	-0.0946752
13.88	2.1e-07	2.94e-06	0.000105258	0.0006475	0.00161502	0.323018	0.241303	0.0922791	-0.0175411	-0.0996546
13.89	2.1e-07	2.94e-06	0.000105258	0.0006475	0.00161502	0.318038	0.236324	0.0873022	-0.0225153	-0.104634
13.9	2.1e-07	2.94e-06	0.000105258	0.0006475	0.00161502	0.313059	0.231345	0.0823253	-0.0274896	-0.109613
13.91	2.1e-07	2.94e-06	0.000105258	0.0006475	0.00161502	0.30808	0.226366	0.0773485	-0.0324638	-0.114593
13.92	2.1e-07	2.94e-06	0.000105258	0.0006475	0.00161502	0.3031	0.221387	0.0723716	-0.037438	-0.119572
13.93	2.1e-07	2.94e-06	0.000105258	0.0006475	0.00161502	0.298121	0.216407	0.0673947	-0.0424122	-0.124552
13.94	2.1e-07	2.94e-06	0.000105258	0.0006475	0.00161502	0.293141	0.211428	0.0624179	-0.0473864	-0.129531
13.95	2.1e-07	2.94e-06	0.000105258	0.0006475	0.00161502	0.288162	0.206449	0.057441	-0.0523606	-0.13451
13.96	2.1e-07	2.94e-06	0.000105258	0.0006475	0.00161502	0.283183	0.20147	0.0524641	-0.0573349	-0.13949
13.97	2.1e-07	2.94e-06	0.000105258	0.0006475	0.00161502	0.278203	0.19649	0.0474873	-0.0623091	-0.144469
13.98	2.1e-07	2.94e-06	0.000105258	0.0006475	0.00161502	0.273224	0.191511	0.0425104	-0.0672833	-0.149449
13.99	2.1e-07	2.94e-06	0.000105258	0.0006475	0.00161502	0.268245	0.186532	0.0375335	-0.0722575	-0.154428
14	2.1e-07	2.94e-06	0.000105258	0.0006475	0.00161502	0.263265	0.181553	0.0325567	-0.0772317	-0.159407
14.01	2.1e-07	2.94e-06	0.000105258	0.0006475	0.00161502	0.258286	0.176573	0.0275798	-0.0822059	-0.164387
14.02	2.1e-07	2.94e-06	0.000105258	0.0006475	0.00161502	0.253306	0.171594	0.0226029	-0.0871802	-0.169366
14.03	2.1e-07	2.94e-06	0.000105258	0.0006475	0.00161502	0.248327	0.166615	0.017626	-0.0921544	-0.174345
14.04	2.1e-07	2.94e-06	0.000105258	0.000647499	0.00161502	0.243348	0.161636	0.0126492	-0.0971286	-0.179325
14.05	2.1e-07	2.94e-06	0.000105258	0.000647499	0.00161502	0.238368	0.156657	0.0076723	-0.102103	-0.184304
14.06	2.1e-07	2.94e-06	0.000105258	0.000647499	0.00161502	0.233389	0.151677	0.00269544	-0.107077	-0.189284
14.07	2.1e-07	2.94e-06	0.000105258	0.000647499	0.00161502	0.22841	0.146698	-0.00228143	-0.112051	-0.194263
14.08	2.1e-07	2.94e-06	0.000105258	0.000647499	0.00161502	0.22343	0.141719	-0.0072583	-0.117025	-0.199242
14.09	2.1e-07	2.94e-06	0.000105258	0.000647499	0.00161502	0.218451	0.13674	-0.0122352	-0.122	-0.204222
14.1	2.1e-07	2.94e-06	0.000105258	0.000647499	0.00161502	0.213471	0.13176	-0.017212	-0.126974	-0.209201
14.11	2.1e-07	2.94e-06	0.000105258	0.000647499	0.00161502	0.208492	0.126781	-0.0221889	-0.131948	-0.214181
14.12	2.1e-07	2.94e-06	0.000105258	0.000647499	0.00161502	0.203513	0.121802	-0.0271658	-0.136922	-0.21916
14.13	2.1e-07	2.94e-06	0.000105258	0.000647499	0.00161502	0.198533	0.116823	-0.0321426	-0.141897	-0.224139
14.14	2.1e-07	2.94e-06	0.000105258	0.000647499	0.00161502	0.193554	0.111844	-0.0371195	-0.146871	-0.229119
14.15	2.1e-07	2.94e-06	0.000105258	0.000647499	0.00161502	0.188575	0.106864	-0.0420964	-0.151845	-0.234098
14.16	2.1e-07	2.94e-06	0.000105258	0.000647499	0.00161502	0.183595	0.101885	-0.0470733	-0.156819	-0.239078
14.17	2.1e-07	2.94e-06	0.000105258	0.000647499	0.00161502	0.178616	0.0969058	-0.0520501	-0.161793	-0.244057
14.18	2.1e-07	2.94e-06	0.000105258	0.000647499	0.00161502	0.173636	0.0919266	-0.057027	-0.166768	-0.249036
14.19	2.1e-07	2.94e-06	0.000105258	0.000647499	0.00161502	0.168657	0.0869474	-0.0620039	-0.171742	-0.254016
14.2	2.1e-07	2.94e-06	0.000105258	0.000647499	0.00161502	0.163678	0.0819681	-0.0669807	-0.176716	-0.258995
14.21	2.1e-07	2.94e-06	0.000105258	0.000647499	0.00161502	0.158698	0.0769889	-0.0719576	-0.18169	-0.263975
14.22	2.1e-07	2.94e-06	0.000105258	0.000647499	0.00161502	0.153719	0.0720097	-0.0769345	-0.186664	-0.268954
14.23	2.1e-07	2.94e-06	0.000105258	0.000647499	0.00161502	0.14874	0.0670304	-0.0819113	-0.191639	-0.273933
14.24	2.1e-07	2.94e-06	0.000105258	0.000647499	0.00161502	0.14376	0.0620512	-0.0868882	-0.196613	-0.278913
14.25	2.1e-07	2.94e-06	0.000105258	0.000647499	0.00161502	0.138781	0.057072	-0.0918651	-0.201587	-0.283892
14.26	2.1e-07	2.94e-06	0.000105258	0.000647499	0.00161502	0.133801	0.0520928	-0.0968419	-0.206561	-0.288872
14.27	2.1e-07	2.94e-06	0.000105258	0.000647499	0.00161502	0.128822	0.0471135	-0.101819	-0.211536	-0.293851
14.28	2.1e-07	2.94e-06	0.000105258	0.000647499	0.00161502	0.123843	0.0421343	-0.106796	-0.21651	-0.29883
14.29	2.1e-07	2.94e-06	0.000105258	0.000647499	0.00161502	0.118863	0.0371551	-0.111773	-0.221484	-0.30381
14.3	2.1e-07	2.94e-06	0.000105258	0.000647499	0.00161502	0.113884	0.0321758	-0.116749	-0.226458	-0.308789
14.31	2.1e-07	2.94e-06	0.000105258	0.000647499	0.00161502	0.108905	0.0271966	-0.121726	-0.231432	-0.313769
14.32	2.1e-07	2.94e-06	0.000105258	0.000647499	0.00161502	0.103925	0.0222174	-0.126703	-0.236407	-0.318748
14.33	2.1e-07	2.94e-06	0.000105258	0.000647499	0.00161502	0.0989458	0.0172382	-0.13168	-0.241381	-0.323727
14.34	2.1e-07	2.94e-06	0.000105258	0.000647499	0.00161502	0.0939664	0.0122589	-0.136657	-0.246355	-0.328707
14.35	2.1e-07	2.94e-06	0.000105258	0.000647499	0.00161502	0.088987	0.00727969	-0.141634	-0.251329	-0.333686
14.36	2.1e-07	2.94e-06	0.000105258	0.000647499	0.00161502	0.0840077	0.00230046	-0.146611	-0.256304	-0.338665
14.37	2.1e-07	2.94e-06	0.000105258	0.000647499	0.00161502	0.0790283	-0.00267877	-0.151588	-0.261278	-0.343645
14.38	2.1e-07	2.94e-06	0.000105258	0.000647499	0.00161502	0.0740489	-0.00765799	-0.156564	-0.266252	-0.348624
14.39	2.1e-07	2.94e-06	0.000105258	0.000647499	0.00161502	0.0690695	-0.0126372	-0.161541	-0.271226	-0.353604
14.4	2.1e-07	2.94e-06	0.000105258	0.000647499	0.00161502	0.0640901	-0.0176165	-0.166518	-0.2762	-0.358583
14.41	2.1e-07	2.94e-06	0.000105258	0.000647499	0.00161502	0.0591108	-0.0225957	-0.171495	-0.281175	-0.363562
14.42	2.1e-07	2.94e-06	0.000105258	0.000647499	0.00161502	0.0541314	-0.0275749	-0.176472	-0.286149	-0.368542
14.43	2.1e-07	2.94e-06	0.000105258	0.000647499	0.00161502	0.049152	-0.0325541	-0.181449	-0.291123	-0.373521
14.44	2.1e-07	2.94e-06	0.000105258	0.000647499	0.00161502	0.0441726	-0.0375334	-0.186426	-0.296097	-0.378501
14.45	2.1e-07	2.94e-06	0.000105258	0.000647499	0.00161502	0.0391933	-0.0425126	-0.191402	-0.301071	-0.38348
14.46	2.1e-07	2.94e-06	0.000105258	0.000647499	0.00161502	0.0342139	-0.0474918	-0.196379	-0.306046	-0.388459
14.47	2.1e-07	2.94e-06	0.000105258	0.000647499	0.00161502	0.0292345	-0.0524711	-0.201356	-0.31102	-0.393439
14.48	2.1e-07	2.94e-06	0.000105258	0.000647499	0.00161502	0.0242551	-0.0574503	-0.206333	-0.315994	-0.398418
14.49	2.1e-07	2.94e-06	0.000105258	0.000647499	0.00161502	0.0192757	-0.0624295	-0.21131	-0.320968	-0.403398
14.5	2.1e-07	2.94e-06	0.000105258	0.000647499	0.00161502	0.0142964	-0.0674087	-0.216287	-0.325943	-0.408377
14.51	2.1e-07	2.94e-06	0.000105258	0.000647499	0.00161502	0.00931699	-0.072388	-0.221264	-0.330917	-0.413356
14.52	2.1e-07	2.94e-06	0.000105258	0.000647499	0.00161502	0.00433762	-0.0773672	-0.226241	-0.335891	-0.418336
14.53	2.1e-07	2.94e-06	0.000105258	0.000647499	0.00161502	-0.00064176	-0.0823464	-0.231217	-0.340865	-0.423315
14.54	2.1e-07	2.94e-06	0.000105258	0.000647499	0.00161502	-0.00562114	-0.0873257	-0.236194	-0.345839	-0.428295
14.55	2.1e-07	2.94e-06	0.000105258	0.000647499	0.00161502	-0.0106005	-0.0923049	-0.241171	-0.350814	-0.433274
14.56	2.1e-07	2.94e-06	0.000105258	0.000647499	0.00161502	-0.0155799	-0.0972841	-0.246148	-0.355788	-0.438253
14.57	2.1e-07	2.94e-06	0.000105258	0.000647499	0.00161502	-0.0205593	-0.102263	-0.251125	-0.360762	-0.443233
14.58	2.1e-07	2.94e-06	0.000105258	0.000647499	0.00161502	-0.0255386	-0.107243	-0.256102	-0.365736	-0.448212
14.59	2.1e-07	2.94e-06	0.000105258	0.000647499	0.00161502	-0.030518	-0.112222	-0.261079	-0.370711	-0.453192
14.6	2.1e-07	2.94e-06	0.000105258	0.000647499	0.00161502	-0.0354974	-0.117201	-0.266056	-0.375685	-0.458171
14.61	2.1e-07	2.94e-06	0.000105258	0.000647499	0.00161502	-0.0404768	-0.12218	-0.271032	-0.380659	-0.46315
14.62	2.1e-07	2.94e-06	0.000105258	0.000647499	0.00161502	-0.0454562	-0.12716	-0.276009	-0.385633	-0.46813
14.63	2.1e-07	2.94e-06	0.000105258	0.000647499	0.00161502	-0.0504355	-0.132139	-0.280986	-0.390607	-0.473109
14.64	2.1e-07	2.94e-06	0.000105258	0.000647499	0.00161502	-0.0554149	-0.137118	-0.285963	-0.395582	-0.478089
14.65	2.1e-07	2.94e-06	0.000105258	0.000647499	0.00161502	-0.0603943	-0.142097	-0.29094	-0.400556	-0.483068
14.66	2.1e-07	2.94e-06	0.000105258	0.000647499	0.00161502	-0.0653737	-0.147076	-0.295917	-0.40553	-0.488047
14.67	2.1e-07	2.94e-06	0.000105258	0.000647499	0.00161502	-0.070353	-0.152056	-0.300894	-0.410504	-0.493027
14.68	2.1e-07	2.94e-06	0.000105258	0.000647499	0.00161502	-0.0753324	-0.157035	-0.30587	-0.415478	-0.498006
14.69	2.1e-07	2.94e-06	0.000105258	0.000647499	0.00161502	-0.0803118	-0.162014	-0.310847	-0.420453	-0.502985
14.7	2.1e-07	2.94e-06	0.000105258	0.000647499	0.00161502	-0.0852912	-0.166993	-0.315824	-0.425427	-0.507965
14.71	2.1e-07	2.94e-06	0.000105258	0.000647499	0.00161502	-0.0902705	-0.171973	-0.320801	-0.430401	-0.512944
14.72	2.1e-07	2.94e-06	0.000105258	0.000647499	0.00161502	-0.0952499	-0.176952	-0.325778	-0.435375	-0.517924
14.73	2.1e-07	2.94e-06	0.000105258	0.000647499	0.00161502	-0.100229	-0.181931	-0.330755	-0.44035	-0.522903
14.74	2.1e-07	2.94e-06	0.000105258	0.000647499	0.00161502	-0.105209	-0.18691	-0.335732	-0.445324	-0.527882
14.75	2.1e-07	2.94e-06	0.000105258	0.000647499	0.00161502	-0.110188	-0.191889	-0.340709	-0.450298	-0.532862
14.76	2.1e-07	2.94e-06	0.000105258	0.000647499	0.00161502	-0.115167	-0.196869	-0.345685	-0.455272	-0.537841
14.77	2.1e-07	2.94e-06	0.000105258	0.000647499	0.00161502	-0.120147	-0.201848	-0.350662	-0.460246	-0.542821
14.78	2.1e-07	2.94e-06	0.000105258	0.000647499	0.00161502	-0.125126	-0.206827	-0.355639	-0.465221	-0.5478
14.79	2.1e-07	2.94e-06	0.000105258	0.000647499	0.00161502	-0.130106	-0.211806	-0.360616	-0.470195	-0.552779
14.8	2.1e-07	2.94e-06	0.000105258	0.000647499	0.00161502	-0.135085	-0.216786	-0.365593	-0.475169	-0.557759
14.81	2.1e-07	2.94e-06	0.000105258	0.000647499	0.00161502	-0.140064	-0.221765	-0.37057	-0.480143	-0.562738
14.82	2.1e-07	2.94e-06	0.000105258	0.000647499	0.00161502	-0.145044	-0.226744	-0.375547	-0.485118	-0.567718
14.83	2.1e-07	2.94e-06	0.000105258	0.000647499	0.00161502	-0.150023	-0.231723	-0.380523	-0.490092	-0.572697
14.84	2.1e-07	2.94e-06	0.000105258	0.000647499	0.00161502	-0.155002	-0.236703	-0.3855	-0.495066	-0.577676
14.85	2.1e-07	2.94e-06	0.000105258	0.000647499	0.00161502	-0.159982	-0.241682	-0.390477	-0.50004	-0.582656
14.86	2.1e-07	2.94e-06	0.000105258	0.000647499	0.00161502	-0.164961	-0.246661	-0.395454	-0.505014	-0.587635
14.87	2.1e-07	2.94e-06	0.000105258	0.000647499	0.00161502	-0.169941	-0.25164	-0.400431	-0.509989	-0.592615
14.88	2.1e-07	2.94e-06	0.000105258	0.000647499	0.00161502	-0.17492	-0.256619	-0.405408	-0.514963	-0.597594
14.89	2.1e-07	2.94e-06	0.000105258	0.000647499	0.00161502	-0.179899	-0.261599	-0.410385	-0.519937	-0.602573
14.9	2.1e-07	2.94e-06	0.000105258	0.000647499	0.00161502	-0.184879	-0.266578	-0.415362	-0.524911	-0.607553
14.91	2.1e-07	2.94e-06	0.000105258	0.000647499	0.00161502	-0.189858	-0.271557	-0.420338	-0.529885	-0.612532
14.92	2.1e-07	2.94e-06	0.000105258	0.000647499	0.00161502	-0.194837	-0.276536	-0.425315	-0.53486	-0.617512
14.93	2.1e-07	2.94e-06	0.000105258	0.000647499	0.00161502	-0.199817	-0.281516	-0.430292	-0.539834	-0.622491
14.94	2.1e-07	2.94e-06	0.000105258	0.000647499	0.00161502	-0.204796	-0.286495	-0.435269	-0.544808	-0.62747
14.95	2.1e-07	2.94e-06	0.000105258	0.000647499	0.00161502	-0.209776	-0.291474	-0.440246	-0.549782	-0.63245
14.96	2.1e-07	2.94e-06	0.000105258	0.000647499	0.00161502	-0.214755	-0.296453	-0.445223	-0.554757	-0.637429
14.97	2.1e-07	2.94e-06	0.000105258	0.000647499	0.00161502	-0.219734	-0.301433	-0.4502	-0.559731	-0.642409
14.98	2.1e-07	2.94e-06	0.000105258	0.000647499	0.00161502	-0.224714	-0.306412	-0.455177	-0.564705	-0.647388
14.99	2.1e-07	2.94e-06	0.000105258	0.000647499	0.00161502	-0.229693	-0.311391	-0.460153	-0.569679	-0.652367
15	2.1e-07	2.94e-06	0.000105258	0.000647499	0.00161502	-0.234672	-0.31637	-0.46513	-0.574653	-0.657347
15.01	2.1e-07	2.94e-06	0.000105258	0.000647499	0.00161502	-0.239652	-0.321349	-0.470107	-0.579628	-0.662326
15.02	2.1e-07	2.94e-06	0.000105258	0.000647499	0.00161502	-0.244631	-0.326329	-0.475084	-0.584602	-0.667305
15.03	2.1e-07	2.94e-06	0.000105258	0.000647499	0.00161502	-0.249611	-0.331308	-0.480061	-0.589576	-0.672285
15.04	2.1e-07	2.94e-06	0.000105258	0.000647499	0.00161502	-0.25459	-0.336287	-0.485038	-0.59455	-0.677264
15.05	2.1e-07	2.94e-06	0.000105258	0.000647499	0.00161502	-0.259569	-0.341266	-0.490015	-0.599525	-0.682244
15.06	2.1e-07	2.94e-06	0.000105258	0.000647499	0.00161502	-0.264549	-0.346246	-0.494991	-0.604499	-0.687223
15.07	2.1e-07	2.94e-06	0.000105258	0.000647499	0.00161502	-0.269528	-0.351225	-0.499968	-0.609473	-0.692202
15.08	2.1e-07	2.94e-06	0.000105258	0.000647499	0.00161502	-0.274508	-0.356204	-0.504945	-0.614447	-0.697182
15.09	2.1e-07	2.94e-06	0.000105258	0.000647499	0.00161502	-0.279487	-0.361183	-0.509922	-0.619421	-0.702161
15.1	2.1e-07	2.94e-06	0.000105258	0.000647499	0.00161502	-0.284466	-0.366163	-0.514899	-0.624396	-0.707141
15.11	2.1e-07	2.94e-06	0.000105258	0.000647499	0.00161502	-0.289446	-0.371142	-0.519876	-0.62937	-0.71212
15.12	2.1e-07	2.94e-06	0.000105258	0.000647499	0.00161502	-0.294425	-0.376121	-0.524853	-0.634344	-0.717099
15.13	2.1e-07	2.94e-06	0.000105258	0.000647499	0.00161502	-0.299404	-0.3811	-0.52983	-0.639318	-0.722079
15.14	2.1e-07	2.94e-06	0.000105258	0.000647499	0.00161502	-0.304384	-0.386079	-0.534806	-0.644292	-0.727058
15.15	2.1e-07	2.94e-06	0.000105258	0.000647499	0.00161502	-0.309363	-0.391059	-0.539783	-0.649267	-0.732038
15.16	2.1e-07	2.94e-06	0.000105258	0.000647499	0.00161502	-0.314343	-0.396038	-0.54476	-0.654241	-0.737017
15.17	2.1e-07	2.94e-06	0.000105258	0.000647499	0.00161502	-0.319322	-0.401017	-0.549737	-0.659215	-0.741996
15.18	2.1e-07	2.94e-06	0.000105258	0.000647499	0.00161502	-0.324301	-0.405996	-0.554714	-0.664189	-0.746976
15.19	2.1e-07	2.94e-06	0.000105258	0.000647499	0.00161502	-0.329281	-0.410976	-0.559691	-0.669164	-0.751955
15.2	2.1e-07	2.94e-06	0.000105258	0.000647499	0.00161502	-0.33426	-0.415955	-0.564668	-0.674138	-0.756935
15.21	2.1e-07	2.94e-06	0.000105258	0.000647499	0.00161502	-0.339239	-0.420934	-0.569645	-0.679112	-0.761914
15.22	2.1e-07	2.94e-06	0.000105258	0.000647499	0.00161502	-0.344219	-0.425913	-0.574621	-0.684086	-0.766893
15.23	2.1e-07	2.94e-06	0.000105258	0.000647499	0.00161502	-0.349198	-0.430893	-0.579598	-0.68906	-0.771873
15.24	2.1e-07	2.94e-06	0.000105258	0.000647499	0.00161502	-0.354178	-0.435872	-0.584575	-0.694035	-0.776852
15.25	2.1e-07	2.94e-06	0.000105258	0.000647499	0.00161502	-0.359157	-0.440851	-0.589552	-0.699009	-0.781832
15.26	2.1e-07	2.94e-06	0.000105258	0.000647499	0.00161502	-0.364136	-0.44583	-0.594529	-0.703983	-0.786811
15.27	2.1e-07	2.94e-06	0.000105258	0.000647499	0.00161502	-0.369116	-0.450809	-0.599506	-0.708957	-0.79179
15.28	2.1e-07	2.94e-06	0.000105258	0.000647499	0.00161502	-0.374095	-0.455789	-0.604483	-0.713931	-0.79677
15.29	2.1e-07	2.94e-06	0.000105258	0.000647499	0.00161502	-0.379074	-0.460768	-0.609459	-0.718906	-0.801749
15.3	2.1e-07	2.94e-06	0.000105258	0.000647499	0.00161502	-0.384054	-0.465747	-0.614436	-0.72388	-0.806728
15.31	2.1e-07	2.94e-06	0.000105258	0.000647499	0.00161502	-0.389033	-0.470726	-0.619413	-0.728854	-0.811708
15.32	2.1e-07	2.94e-06	0.000105258	0.000647499	0.00161502	-0.394013	-0.475706	-0.62439	-0.733828	-0.816687
15.33	2.1e-07	2.94e-06	0.000105258	0.000647499	0.00161502	-0.398992	-0.480685	-0.629367	-0.738803	-0.821667
15.34	2.1e-07	2.94e-06	0.000105258	0.000647499	0.00161502	-0.403971	-0.485664	-0.634344	-0.743777	-0.826646
15.35	2.1e-07	2.94e-06	0.000105258	0.000647499	0.00161502	-0.408951	-0.490643	-0.639321	-0.748751	-0.831625
15.36	2.1e-07	2.94e-06	0.000105258	0.000647499	0.00161502	-0.41393	-0.495622	-0.644298	-0.753725	-0.836605
15.37	2.1e-07	2.94e-06	0.000105258	0.000647499	0.00161502	-0.418909	-0.500602	-0.649274	-0.758699	-0.841584
15.38	2.1e-07	2.94e-06	0.000105258	0.000647499	0.00161502	-0.423889	-0.505581	-0.654251	-0.763674	-0.846564
15.39	2.1e-07	2.94e-06	0.000105258	0.000647499	0.00161502	-0.428868	-0.51056	-0.659228	-0.768648	-0.851543
15.4	2.1e-07	2.94e-06	0.000105258	0.000647499	0.00161502	-0.433848	-0.515539	-0.664205	-0.773622	-0.856522
15.41	2.1e-07	2.94e-06	0.000105258	0.000647499	0.00161502	-0.438827	-0.520519	-0.669182	-0.778596	-0.861502
15.42	2.1e-07	2.94e-06	0.000105258	0.000647499	0.00161502	-0.443806	-0.525498	-0.674159	-0.783571	-0.866481
15.43	2.1e-07	2.94e-06	0.000105258	0.000647499	0.00161502	-0.448786	-0.530477	-0.679136	-0.788545	-0.871461
15.44	2.1e-07	2.94e-06	0.000105257	0.000647499	0.00161502	-0.453765	-0.535456	-0.684113	-0.793519	-0.87644
15.45	2.1e-07	2.94e-06	0.000105257	0.000647499	0.00161502	-0.458744	-0.540436	-0.689089	-0.798493	-0.881419
15.46	2.1e-07	2.94e-06	0.000105257	0.000647499	0.00161502	-0.463724	-0.545415	-0.694066	-0.803467	-0.886399
15.47	2.1e-07	2.94e-06	0.000105257	0.000647499	0.00161502	-0.468703	-0.550394	-0.699043	-0.808442	-0.891378
15.48	2.1e-07	2.94e-06	0.000105257	0.000647499	0.00161502	-0.473683	-0.555373	-0.70402	-0.813416	-0.896358
15.49	2.1e-07	2.94e-06	0.000105257	0.000647499	0.00161502	-0.478662	-0.560352	-0.708997	-0.81839	-0.901337
15.5	2.1e-07	2.94e-06	0.000105257	0.000647499	0.00161502	-0.483641	-0.565332	-0.713974	-0.823364	-0.906316
15.51	2.1e-07	2.94e-06	0.000105257	0.000647499	0.00161502	-0.488621	-0.570311	-0.718951	-0.828338	-0.911296
15.52	2.1e-07	2.94e-06	0.000105257	0.000647499	0.00161502	-0.4936	-0.57529	-0.723927	-0.833313	-0.916275
15.53	2.1e-07	2.94e-06	0.000105257	0.000647499	0.00161502	-0.498579	-0.580269	-0.728904	-0.838287	-0.921255
15.54	2.1e-07	2.94e-06	0.000105257	0.000647499	0.00161502	-0.503559	-0.585249	-0.733881	-0.843261	-0.926234
15.55	2.1e-07	2.94e-06	0.000105257	0.000647499	0.00161502	-0.508538	-0.590228	-0.738858	-0.848235	-0.931213
15.56	2.1e-07	2.94e-06	0.000105257	0.000647499	0.00161502	-0.513518	-0.595207	-0.743835	-0.85321	-0.936193
15.57	2.1e-07	2.94e-06	0.000105257	0.000647499	0.00161502	-0.518497	-0.600186	-0.748812	-0.858184	-0.941172
15.58	2.1e-07	2.94e-06	0.000105257	0.000647499	0.00161502	-0.523476	-0.605166	-0.753789	-0.863158	-0.946152
15.59	2.1e-07	2.94e-06	0.000105257	0.000647499	0.00161502	-0.528456	-0.610145	-0.758766	-0.868132	-0.951131
15.6	2.1e-07	2.94e-06	0.000105257	0.000647499	0.00161502	-0.533435	-0.615124	-0.763742	-0.873106	-0.95611
15.61	2.1e-07	2.94e-06	0.000105257	0.000647499	0.00161502	-0.538414	-0.620103	-0.768719	-0.878081	-0.96109
15.62	2.1e-07	2.94e-06	0.000105257	0.000647499	0.00161502	-0.543394	-0.625082	-0.773696	-0.883055	-0.966069
15.63	2.1e-07	2.94e-06	0.000105257	0.000647499	0.00161502	-0.548373	-0.630062	-0.778673	-0.888029	-0.971048
15.64	2.1e-07	2.94e-06	0.000105257	0.000647499	0.00161502	-0.553353	-0.635041	-0.78365	-0.893003	-0.976028
15.65	2.1e-07	2.94e-06	0.000105257	0.000647499	0.00161502	-0.558332	-0.64002	-0.788627	-0.897978	-0.981007
15.66	2.1e-07	2.94e-06	0.000105257	0.000647499	0.00161502	-0.563311	-0.644999	-0.793604	-0.902952	-0.985987
15.67	2.1e-07	2.94e-06	0.000105257	0.000647499	0.00161502	-0.568291	-0.649979	-0.798581	-0.907926	-0.990966
15.68	2.1e-07	2.94e-06	0.000105257	0.000647499	0.00161502	-0.57327	-0.654958	-0.803557	-0.9129	-0.995945
15.69	2.1e-07	2.94e-06	0.000105257	0.000647499	0.00161502	-0.57825	-0.659937	-0.808534	-0.917874	-1.00092
15.7	2.1e-07	2.94e-06	0.000105257	0.000647499	0.00161502	-0.583229	-0.664916	-0.813511	-0.922849	-1.0059
15.71	2.1e-07	2.94e-06	0.000105257	0.000647499	0.00161502	-0.588208	-0.669896	-0.818488	-0.927823	-1.01088
15.72	2.1e-07	2.94e-06	0.000105257	0.000647499	0.00161502	-0.593188	-0.674875	-0.823465	-0.932797	-1.01586
15.73	2.1e-07	2.94e-06	0.000105257	0.000647499	0.00161502	-0.598167	-0.679854	-0.828442	-0.937771	-1.02084
15.74	2.1e-07	2.94e-06	0.000105257	0.000647499	0.00161502	-0.603146	-0.684833	-0.833419	-0.942745	-1.02582
15.75	2.1e-07	2.94e-06	0.000105257	0.000647499	0.00161502	-0.608126	-0.689812	-0.838395	-0.94772	-1.0308
15.76	2.1e-07	2.94e-06	0.000105257	0.000647499	0.00161502	-0.613105	-0.694792	-0.843372	-0.952694	-1.03578
15.77	2.1e-07	2.94e-06	0.000105257	0.000647499	0.00161502	-0.618085	-0.699771	-0.848349	-0.957668	-1.04076
15.78	2.1e-07	2.94e-06	0.000105257	0.000647499	0.00161502	-0.623064	-0.70475	-0.853326	-0.962642	-1.04574
15.79	2.1e-07	2.94e-06	0.000105257	0.000647499	0.00161502	-0.628043	-0.709729	-0.858303	-0.967617	-1.05072
15.8	2.1e-07	2.94e-06	0.000105257	0.000647499	0.00161502	-0.633023	-0.714709	-0.86328	-0.972591	-1.0557
15.81	2.1e-07	2.94e-06	0.000105257	0.000647499	0.00161502	-0.638002	-0.719688	-0.868257	-0.977565	-1.06068
15.82	2.1e-07	2.94e-06	0.000105257	0.000647499	0.00161502	-0.642981	-0.724667	-0.873234	-0.982539	-1.06566
15.83	2.1e-07	2.94e-06	0.000105257	0.000647499	0.00161502	-0.647961	-0.729646	-0.87821	-0.987513	-1.07064
15.84	2.1e-07	2.94e-06	0.000105257	0.000647499	0.00161502	-0.65294	-0.734626	-0.883187	-0.992488	-1.07562
15.85	2.1e-07	2.94e-06	0.000105257	0.000647499	0.00161502	-0.65792	-0.739605	-0.888164	-0.997462	-1.0806
15.86	2.1e-07	2.94e-06	0.000105257	0.000647499	0.00161502	-0.662899	-0.744584	-0.893141	-1.00244	-1.08557
15.87	2.1e-07	2.94e-06	0.000105257	0.000647499	0.00161502	-0.667878	-0.749563	-0.898118	-1.00741	-1.09055
15.88	2.1e-07	2.94e-06	0.000105257	0.000647499	0.00161502	-0.672858	-0.754542	-0.903095	-1.01238	-1.09553
15.89	2.1e-07	2.94e-06	0.000105257	0.000647499	0.00161502	-0.677837	-0.759522	-0.908072	-1.01736	-1.10051
15.9	2.1e-07	2.94e-06	0.000105257	0.000647499	0.00161502	-0.682816	-0.764501	-0.913048	-1.02233	-1.10549
15.91	2.1e-07	2.94e-06	0.000105257	0.000647499	0.00161502	-0.687796	-0.76948	-0.918025	-1.02731	-1.11047
15.92	2.1e-07	2.94e-06	0.000105257	0.000647499	0.00161502	-0.692775	-0.774459	-0.923002	-1.03228	-1.11545
15.93	2.1e-07	2.94e-06	0.000105257	0.000647499	0.00161502	-0.697755	-0.779439	-0.927979	-1.03726	-1.12043
15.94	2.1e-07	2.94e-06	0.000105257	0.000647499	0.00161502	-0.702734	-0.784418	-0.932956	-1.04223	-1.12541
15.95	2.1e-07	2.94e-06	0.000105257	0.000647499	0.00161502	-0.707713	-0.789397	-0.937933	-1.0472	-1.13039
15.96	2.1e-07	2.94e-06	0.000105257	0.000647499	0.00161502	-0.712693	-0.794376	-0.94291	-1.05218	-1.13537
15.97	2.1e-07	2.94e-06	0.000105257	0.000647499	0.00161502	-0.717672	-0.799355	-0.947887	-1.05715	-1.14035
15.98	2.1e-07	2.94e-06	0.000105257	0.000647499	0.00161502	-0.722651	-0.804335	-0.952863	-1.06213	-1.14533
15.99	2.1e-07	2.94e-06	0.000105257	0.000647499	0.00161502	-0.727631	-0.809314	-0.95784	-1.0671	-1.15031
16	2.1e-07	2.94e-06	0.000105257	0.000647499	0.00161502	-0.73261	-0.814293	-0.962817	-1.07208	-1.15529
16.01	2.1e-07	2.94e-06	0.000105257	0.000647499	0.00161502	-0.73759	-0.819272	-0.967794	-1.07705	-1.16027
16.02	2.1e-07	2.94e-06	0.000105257	0.000647499	0.00161502	-0.742569	-0.824252	-0.972771	-1.08202	-1.16524
16.03	2.1e-07	2.94e-06	0.000105257	0.000647499	0.00161502	-0.747548	-0.829231	-0.977748	-1.087	-1.17022
16.04	2.1e-07	2.94e-06	0.000105257	0.000647499	0.00161502	-0.752528	-0.83421	-0.982725	-1.09197	-1.1752
16.05	2.1e-07	2.94e-06	0.000105257	0.000647499	0.00161502	-0.757507	-0.839189	-0.987702	-1.09695	-1.18018
16.06	2.1e-07	2.94e-06	0.000105257	0.000647499	0.00161502	-0.762486	-0.844169	-0.992678	-1.10192	-1.18516
16.07	2.1e-07	2.94e-06	0.000105257	0.000647499	0.00161502	-0.767466	-0.849148	-0.997655	-1.10689	-1.19014
16.08	2.1e-07	2.94e-06	0.000105257	0.000647499	0.00161502	-0.772445	-0.854127	-1.00263	-1.11187	-1.19512
16.09	2.1e-07	2.94e-06	0.000105257	0.000647499	0.00161502	-0.777425	-0.859106	-1.00761	-1.11684	-1.2001
16.1	2.1e-07	2.94e-06	0.000105257	0.000647499	0.00161502	-0.782404	-0.864085	-1.01259	-1.12182	-1.20508
16.11	2.1e-07	2.94e-06	0.000105257	0.000647499	0.00161502	-0.787383	-0.869065	-1.01756	-1.12679	-1.21006
16.12	2.1e-07	2.94e-06	0.000105257	0.000647499	0.00161502	-0.792363	-0.874044	-1.02254	-1.13177	-1.21504
16.13	2.1e-07	2.94e-06	0.000105257	0.000647499	0.00161502	-0.797342	-0.879023	-1.02752	-1.13674	-1.22002
16.14	2.1e-07	2.94e-06	0.000105257	0.000647499	0.00161502	-0.802321	-0.884002	-1.03249	-1.14171	-1.225
16.15	2.1e-07	2.94e-06	0.000105257	0.000647499	0.00161502	-0.807301	-0.888982	-1.03747	-1.14669	-1.22998
16.16	2.1e-07	2.94e-06	0.000105257	0.000647499	0.00161502	-0.81228	-0.893961	-1.04245	-1.15166	-1.23496
16.17	2.1e-07	2.94e-06	0.000105257	0.000647499	0.00161502	-0.81726	-0.89894	-1.04742	-1.15664	-1.23994
16.18	2.1e-07	2.94e-06	0.000105257	0.000647499	0.00161502	-0.822239	-0.903919	-1.0524	-1.16161	-1.24492
16.19	2.1e-07	2.94e-06	0.000105257	0.000647499	0.00161502	-0.827218	-0.908899	-1.05738	-1.16659	-1.24989
16.2	2.1e-07	2.94e-06	0.000105257	0.000647499	0.00161502	-0.832198	-0.913878	-1.06235	-1.17156	-1.25487
16.21	2.1e-07	2.94e-06	0.000105257	0.000647499	0.00161502	-0.837177	-0.918857	-1.06733	-1.17653	-1.25985
16.22	2.1e-07	2.94e-06	0.000105257	0.000647499	0.00161502	-0.842156	-0.923836	-1.07231	-1.18151	-1.26483
16.23	2.1e-07	2.94e-06	0.000105257	0.000647499	0.00161502	-0.847136	-0.928815	-1.07729	-1.18648	-1.26981
16.24	2.1e-07	2.94e-06	0.000105257	0.000647499	0.00161502	-0.852115	-0.933795	-1.08226	-1.19146	-1.27479
16.25	2.1e-07	2.94e-06	0.000105257	0.000647499	0.00161502	-0.857095	-0.938774	-1.08724	-1.19643	-1.27977
16.26	2.1e-07	2.94e-06	0.000105257	0.000647499	0.00161502	-0.862074	-0.943753	-1.09222	-1.2014	-1.28475
16.27	2.1e-07	2.94e-06	0.000105257	0.000647499	0.00161502	-0.867053	-0.948732	-1.09719	-1.20638	-1.28973
16.28	2.1e-07	2.94e-06	0.000105257	0.000647499	0.00161502	-0.872033	-0.953712	-1.10217	-1.21135	-1.29471
16.29	2.1e-07	2.94e-06	0.000105257	0.000647499	0.00161502	-0.877012	-0.958691	-1.10715	-1.21633	-1.29969
16.3	2.1e-07	2.94e-06	0.000105257	0.000647499	0.00161502	-0.881992	-0.96367	-1.11212	-1.2213	-1.30467
16.31	2.1e-07	2.94e-06	0.000105257	0.000647499	0.00161502	-0.886971	-0.968649	-1.1171	-1.22628	-1.30965
16.32	2.1e-07	2.94e-06	0.000105257	0.000647499	0.00161502	-0.89195	-0.973629	-1.12208	-1.23125	-1.31463
16.33	2.1e-07	2.94e-06	0.000105257	0.000647499	0.00161502	-0.89693	-0.978608	-1.12705	-1.23622	-1.31961
16.34	2.1e-07	2.94e-06	0.000105257	0.000647499	0.00161502	-0.901909	-0.983587	-1.13203	-1.2412	-1.32459
16.35	2.1e-07	2.94e-06	0.000105257	0.000647499	0.00161502	-0.906888	-0.988566	-1.13701	-1.24617	-1.32956
16.36	2.1e-07	2.94e-06	0.000105257	0.000647499	0.00161502	-0.911868	-0.993545	-1.14198	-1.25115	-1.33454
16.37	2.1e-07	2.94e-06	0.000105257	0.000647499	0.00161502	-0.916847	-0.998525	-1.14696	-1.25612	-1.33952
16.38	2.1e-07	2.94e-06	0.000105257	0.000647499	0.00161502	-0.921827	-1.0035	-1.15194	-1.2611	-1.3445
16.39	2.1e-07	2.94e-06	0.000105257	0.000647499	0.00161502	-0.926806	-1.00848	-1.15692	-1.26607	-1.34948
16.4	2.1e-07	2.94e-06	0.000105257	0.000647499	0.00161502	-0.931785	-1.01346	-1.16189	-1.27104	-1.35446
16.41	2.1e-07	2.94e-06	0.000105257	0.000647499	0.00161502	-0.936765	-1.01844	-1.16687	-1.27602	-1.35944
16.42	2.1e-07	2.94e-06	0.000105257	0.000647499	0.00161502	-0.941744	-1.02342	-1.17185	-1.28099	-1.36442
16.43	2.1e-07	2.94e-06	0.000105257	0.000647499	0.00161502	-0.946723	-1.0284	-1.17682	-1.28597	-1.3694
16.44	2.1e-07	2.94e-06	0.000105257	0.000647499	0.00161502	-0.951703	-1.03338	-1.1818	-1.29094	-1.37438
16.45	2.1e-07	2.94e-06	0.000105257	0.000647499	0.00161502	-0.956682	-1.03836	-1.18678	-1.29591	-1.37936
16.46	2.1e-07	2.94e-06	0.000105257	0.000647499	0.00161502	-0.961662	-1.04334	-1.19175	-1.30089	-1.38434
16.47	2.1e-07	2.94e-06	0.000105257	0.000647499	0.00161502	-0.966641	-1.04832	-1.19673	-1.30586	-1.38932
16.48	2.1e-07	2.94e-06	0.000105257	0.000647499	0.00161502	-0.97162	-1.0533	-1.20171	-1.31084	-1.3943
16.49	2.1e-07	2.94e-06	0.000105257	0.000647499	0.00161502	-0.9766	-1.05828	-1.20668	-1.31581	-1.39928
16.5	2.1e-07	2.94e-06	0.000105257	0.000647499	0.00161502	-0.981579	-1.06325	-1.21166	-1.32079	-1.40426
16.51	2.1e-07	2.94e-06	0.000105257	0.000647499	0.00161502	-0.986558	-1.06823	-1.21664	-1.32576	-1.40924
16.52	2.1e-07	2.94e-06	0.000105257	0.000647499	0.00161502	-0.991538	-1.07321	-1.22161	-1.33073	-1.41421
16.53	2.1e-07	2.94e-06	0.000105257	0.000647499	0.00161502	-0.996517	-1.07819	-1.22659	-1.33571	-1.41919
16.54	2.1e-07	2.94e-06	0.000105257	0.000647499	0.00161502	-1.0015	-1.08317	-1.23157	-1.34068	-1.42417
16.55	2.1e-07	2.94e-06	0.000105257	0.000647499	0.00161502	-1.00648	-1.08815	-1.23654	-1.34566	-1.42915
16.56	2.1e-07	2.94e-06	0.000105257	0.000647499	0.00161502	-1.01146	-1.09313	-1.24152	-1.35063	-1.43413
16.57	2.1e-07	2.94e-06	0.000105257	0.000647499	0.00161502	-1.01643	-1.09811	-1.2465	-1.35561	-1.43911
16.58	2.1e-07	2.94e-06	0.000105257	0.000647499	0.00161502	-1.02141	-1.10309	-1.25148	-1.36058	-1.44409
16.59	2.1e-07	2.94e-06	0.000105257	0.000647499	0.00161502	-1.02639	-1.10807	-1.25645	-1.36555	-1.44907
16.6	2.1e-07	2.94e-06	0.000105257	0.000647499	0.00161502	-1.03137	-1.11305	-1.26143	-1.37053	-1.45405
16.61	2.1e-07	2.94e-06	0.000105257	0.000647499	0.00161502	-1.03635	-1.11803	-1.26641	-1.3755	-1.45903
16.62	2.1e-07	2.94e-06	0.000105257	0.000647499	0.00161502	-1.04133	-1.12301	-1.27138	-1.38048	-1.46401
16.63	2.1e-07	2.94e-06	0.000105257	0.000647499	0.00161502	-1.04631	-1.12798	-1.27636	-1.38545	-1.46899
16.64	2.1e-07	2.94e-06	0.000105257	0.000647499	0.00161502	-1.05129	-1.13296	-1.28134	-1.39043	-1.47397
16.65	2.1e-07	2.94e-06	0.000105257	0.000647499	0.00161502	-1.05627	-1.13794	-1.28631	-1.3954	-1.47895
16.66	2.1e-07	2.94e-06	0.000105257	0.000647499	0.00161502	-1.06125	-1.14292	-1.29129	-1.40037	-1.48393
16.67	2.1e-07	2.94e-06	0.000105257	0.000647499	0.00161502	-1.06623	-1.1479	-1.29627	-1.40535	-1.48891
16.68	2.1e-07	2.94e-06	0.000105257	0.000647499	0.00161502	-1.07121	-1.15288	-1.30124	-1.41032	-1.49388
16.69	2.1e-07	2.94e-06	0.000105257	0.000647499	0.00161502	-1.07619	-1.15786	-1.30622	-1.4153	-1.49886
16.7	2.1e-07	2.94e-06	0.000105257	0.000647499	0.00161502	-1.08117	-1.16284	-1.3112	-1.42027	-1.50384
16.71	2.1e-07	2.94e-06	0.000105257	0.000647499	0.00161502	-1.08615	-1.16782	-1.31617	-1.42524	-1.50882
16.72	2.1e-07	2.94e-06	0.000105257	0.000647499	0.00161502	-1.09113	-1.1728	-1.32115	-1.43022	-1.5138
16.73	2.1e-07	2.94e-06	0.000105257	0.000647499	0.00161502	-1.0961	-1.17778	-1.32613	-1.43519	-1.51878
16.74	2.1e-07	2.94e-06	0.000105257	0.000647499	0.00161502	-1.10108	-1.18276	-1.33111	-1.44017	-1.52376
16.75	2.1e-07	2.94e-06	0.000105257	0.000647499	0.00161502	-1.10606	-1.18774	-1.33608	-1.44514	-1.52874
16.76	2.1e-07	2.94e-06	0.000105257	0.000647499	0.00161502	-1.11104	-1.19271	-1.34106	-1.45012	-1.53372
16.77	2.1e-07	2.94e-06	0.000105257	0.000647499	0.00161502	-1.11602	-1.19769	-1.34604	-1.45509	-1.5387
16.78	2.1e-07	2.94e-06	0.000105257	0.000647499	0.00161502	-1.121	-1.20267	-1.35101	-1.46006	-1.54368
16.79	2.1e-07	2.94e-06	0.000105257	0.000647499	0.00161502	-1.12598	-1.20765	-1.35599	-1.46504	-1.54866
16.8	2.1e-07	2.94e-06	0.000105257	0.000647499	0.00161502	-1.13096	-1.21263	-1.36097	-1.47001	-1.55364
16.81	2.1e-07	2.94e-06	0.000105257	0.000647499	0.00161502	-1.13594	-1.21761	-1.36594	-1.47499	-1.55862
16.82	2.1e-07	2.94e-06	0.000105257	0.000647499	0.00161502	-1.14092	-1.22259	-1.37092	-1.47996	-1.5636
16.83	2.1e-07	2.94e-06	0.000105257	0.000647499	0.00161502	-1.1459	-1.22757	-1.3759	-1.48494	-1.56858
16.84	2.1e-07	2.94e-06	0.000105257	0.000647499	0.00161502	-1.15088	-1.23255	-1.38087	-1.48991	-1.57356
16.85	2.1e-07	2.94e-06	0.000105257	0.000647499	0.00161502	-1.15586	-1.23753	-1.38585	-1.49488	-1.57853
16.86	2.1e-07	2.94e-06	0.000105257	0.000647499	0.00161502	-1.16084	-1.24251	-1.39083	-1.49986	-1.58351
16.87	2.1e-07	2.94e-06	0.000105257	0.000647499	0.00161502	-1.16582	-1.24749	-1.3958	-1.50483	-1.58849
16.88	2.1e-07	2.94e-06	0.000105257	0.000647499	0.00161502	-1.1708	-1.25247	-1.40078	-1.50981	-1.59347
16.89	2.1e-07	2.94e-06	0.000105257	0.000647499	0.00161502	-1.17577	-1.25744	-1.40576	-1.51478	-1.59845
16.9	2.1e-07	2.94e-06	0.000105257	0.000647499	0.00161502	-1.18075	-1.26242	-1.41074	-1.51975	-1.60343
16.91	2.1e-07	2.94e-06	0.000105257	0.000647499	0.00161502	-1.18573	-1.2674	-1.41571	-1.52473	-1.60841
16.92	2.1e-07	2.94e-06	0.000105257	0.000647499	0.00161502	-1.19071	-1.27238	-1.42069	-1.5297	-1.61339
16.93	2.1e-07	2.94e-06	0.000105257	0.000647499	0.00161502	-1.19569	-1.27736	-1.42567	-1.53468	-1.61837
16.94	2.1e-07	2.94e-06	0.000105257	0.000647499	0.00161502	-1.20067	-1.28234	-1.43064	-1.53965	-1.62335
16.95	2.1e-07	2.94e-06	0.000105257	0.000647499	0.00161502	-1.20565	-1.28732	-1.43562	-1.54463	-1.62833
16.96	2.1e-07	2.94e-06	0.000105257	0.000647499	0.00161502	-1.21063	-1.2923	-1.4406	-1.5496	-1.63331
16.97	2.1e-07	2.94e-06	0.000105257	0.000647499	0.00161502	-1.21561	-1.29728	-1.44557	-1.55457	-1.63829
16.98	2.1e-07	2.94e-06	0.000105257	0.000647499	0.00161502	-1.22059	-1.30226	-1.45055	-1.55955	-1.64327
16.99	2.1e-07	2.94e-06	0.000105257	0.000647499	0.00161502	-1.22557	-1.30724	-1.45553	-1.56452	-1.64825
17	2.1e-07	2.94e-06	0.000105257	0.000647499	0.00161502	-1.23055	-1.31222	-1.4605	-1.5695	-1.65323
17.01	2.1e-07	2.94e-06	0.000105257	0.000647499	0.00161502	-1.23553	-1.3172	-1.46548	-1.57447	-1.6582
17.02	2.1e-07	2.94e-06	0.000105257	0.000647499	0.00161502	-1.24051	-1.32217	-1.47046	-1.57945	-1.66318
17.03	2.1e-07	2.94e-06	0.000105257	0.000647499	0.00161502	-1.24549	-1.32715	-1.47543	-1.58442	-1.66816
17.04	2.1e-07	2.94e-06	0.000105257	0.000647499	0.00161502	-1.25047	-1.33213	-1.48041	-1.58939	-1.67314
17.05	2.1e-07	2.94e-06	0.000105257	0.000647499	0.00161502	-1.25544	-1.33711	-1.48539	-1.59437	-1.67812
17.06	2.1e-07	2.94e-06	0.000105257	0.000647499	0.00161502	-1.26042	-1.34209	-1.49037	-1.59934	-1.6831
17.07	2.1e-07	2.94e-06	0.000105257	0.000647499	0.00161502	-1.2654	-1.34707	-1.49534	-1.60432	-1.68808
17.08	2.1e-07	2.94e-06	0.000105257	0.000647499	0.00161502	-1.27038	-1.35205	-1.50032	-1.60929	-1.69306
17.09	2.1e-07	2.94e-06	0.000105257	0.000647499	0.00161502	-1.27536	-1.35703	-1.5053	-1.61426	-1.69804
17.1	2.1e-07	2.94e-06	0.000105257	0.000647499	0.00161502	-1.28034	-1.36201	-1.51027	-1.61924	-1.70302
17.11	2.1e-07	2.94e-06	0.000105257	0.000647499	0.00161502	-1.28532	-1.36699	-1.51525	-1.62421	-1.708
17.12	2.1e-07	2.94e-06	0.000105257	0.000647499	0.00161502	-1.2903	-1.37197	-1.52023	-1.62919	-1.71298
17.13	2.1e-07	2.94e-06	0.000105257	0.000647499	0.00161502	-1.29528	-1.37695	-1.5252	-1.63416	-1.71796
17.14	2.1e-07	2.94e-06	0.000105257	0.000647499	0.00161502	-1.30026	-1.38193	-1.53018	-1.63914	-1.72294
17.15	2.1e-07	2.94e-06	0.000105257	0.000647499	0.00161502	-1.30524	-1.3869	-1.53516	-1.64411	-1.72792
17.16	2.1e-07	2.94e-06	0.000105257	0.000647499	0.00161502	-1.31022	-1.39188	-1.54013	-1.64908	-1.7329
17.17	2.1e-07	2.94e-06	0.000105257	0.000647499	0.00161502	-1.3152	-1.39686	-1.54511	-1.65406	-1.73788
17.18	2.1e-07	2.94e-06	0.000105257	0.000647499	0.00161502	-1.32018	-1.40184	-1.55009	-1.65903	-1.74285
17.19	2.1e-07	2.94e-06	0.000105257	0.000647499	0.00161502	-1.32516	-1.40682	-1.55506	-1.66401	-1.74783
17.2	2.1e-07	2.94e-06	0.000105257	0.000647499	0.00161502	-1.33014	-1.4118	-1.56004	-1.66898	-1.75281
17.21	2.1e-07	2.94e-06	0.000105257	0.000647499	0.00161502	-1.33511	-1.41678	-1.56502	-1.67396	-1.75779
17.22	2.1e-07	2.94e-06	0.000105257	0.000647499	0.00161502	-1.34009	-1.42176	-1.57	-1.67893	-1.76277
17.23	2.1e-07	2.94e-06	0.000105257	0.000647499	0.00161502	-1.34507	-1.42674	-1.57497	-1.6839	-1.76775
17.24	2.1e-07	2.94e-06	0.000105257	0.000647499	0.00161502	-1.35005	-1.43172	-1.57995	-1.68888	-1.77273
17.25	2.1e-07	2.94e-06	0.000105257	0.000647499	0.00161502	-1.35503	-1.4367	-1.58493	-1.69385	-1.77771
17.26	2.1e-07	2.94e-06	0.000105257	0.000647499	0.00161502	-1.36001	-1.44168	-1.5899	-1.69883	-1.78269
17.27	2.1e-07	2.94e-06	0.000105257	0.000647499	0.00161502	-1.36499	-1.44666	-1.59488	-1.7038	-1.78767
17.28	2.1e-07	2.94e-06	0.000105257	0.000647499	0.00161502	-1.36997	-1.45163	-1.59986	-1.70877	-1.79265
17.29	2.1e-07	2.94e-06	0.000105257	0.000647499	0.00161502	-1.37495	-1.45661	-1.60483	-1.71375	-1.79763
17.3	2.1e-07	2.94e-06	0.000105257	0.000647499	0.00161502	-1.37993	-1.46159	-1.60981	-1.71872	-1.80261
17.31	2.1e-07	2.94e-06	0.000105257	0.000647499	0.00161502	-1.38491	-1.46657	-1.61479	-1.7237	-1.80759
17.32	2.1e-07	2.94e-06	0.000105257	0.000647499	0.00161502	-1.38989	-1.47155	-1.61976	-1.72867	-1.81257
17.33	2.1e-07	2.94e-06	0.000105257	0.000647499	0.00161502	-1.39487	-1.47653	-1.62474	-1.73365	-1.81755
17.34	2.1e-07	2.94e-06	0.000105257	0.000647499	0.00161502	-1.39985	-1.48151	-1.62972	-1.73862	-1.82252
17.35	2.1e-07	2.94e-06	0.000105257	0.000647499	0.00161502	-1.40483	-1.48649	-1.63469	-1.74359	-1.8275
17.36	2.1e-07	2.94e-06	0.000105257	0.000647499	0.00161502	-1.40981	-1.49147	-1.63967	-1.74857	-1.83248
17.37	2.1e-07	2.94e-06	0.000105257	0.000647499	0.00161502	-1.41478	-1.49645	-1.64465	-1.75354	-1.83746
17.38	2.1e-07	2.94e-06	0.000105257	0.000647499	0.00161502	-1.41976	-1.50143	-1.64963	-1.75852	-1.84244
17.39	2.1e-07	2.94e-06	0.000105257	0.000647499	0.00161502	-1.42474	-1.50641	-1.6546	-1.76349	-1.84742
17.4	2.1e-07	2.94e-06	0.000105257	0.000647499	0.00161502	-1.42972	-1.51139	-1.65958	-1.76847	-1.8524
17.41	2.1e-07	2.94e-06	0.000105257	0.000647499	0.00161502	-1.4347	-1.51636	-1.66456	-1.77344	-1.85738
17.42	2.1e-07	2.94e-06	0.000105257	0.000647499	0.00161502	-1.43968	-1.52134	-1.66953	-1.77841	-1.86236
17.43	2.1e-07	2.94e-06	0.000105257	0.000647499	0.00161502	-1.44466	-1.52632	-1.67451	-1.78339	-1.86734
17.44	2.1e-07	2.94e-06	0.000105257	0.000647499	0.00161502	-1.44964	-1.5313	-1.67949	-1.78836	-1.87232
17.45	2.1e-07	2.94e-06	0.000105257	0.000647499	0.00161502	-1.45462	-1.53628	-1.68446	-1.79334	-1.8773
17.46	2.1e-07	2.94e-06	0.000105257	0.000647499	0.00161502	-1.4596	-1.54126	-1.68944	-1.79831	-1.88228
17.47	2.1e-07	2.94e-06	0.000105257	0.000647499	0.00161502	-1.46458	-1.54624	-1.69442	-1.80329	-1.88726
17.48	2.1e-07	2.94e-06	0.000105257	0.000647499	0.00161502	-1.46956	-1.55122	-1.69939	-1.80826	-1.89224
17.49	2.1e-07	2.94e-06	0.000105257	0.000647499	0.00161502	-1.47454	-1.5562	-1.70437	-1.81323	-1.89722
17.5	2.1e-07	2.94e-06	0.000105257	0.000647499	0.00161502	-1.47952	-1.56118	-1.70935	-1.81821	-1.9022
17.51	2.1e-07	2.94e-06	0.000105257	0.000647499	0.00161502	-1.4845	-1.56616	-1.71432	-1.82318	-1.90717
17.52	2.1e-07	2.94e-06	0.000105257	0.000647499	0.00161502	-1.48948	-1.57114	-1.7193	-1.82816	-1.91215
17.53	2.1e-07	2.94e-06	0.000105257	0.000647499	0.00161502	-1.49445	-1.57612	-1.72428	-1.83313	-1.91713
17.54	2.1e-07	2.94e-06	0.000105257	0.000647499	0.00161502	-1.49943	-1.58109	-1.72926	-1.8381	-1.92211
17.55	2.1e-07	2.94e-06	0.000105257	0.000647499	0.00161502	-1.50441	-1.58607	-1.73423	-1.84308	-1.92709
17.56	2.1e-07	2.94e-06	0.000105257	0.000647499	0.00161502	-1.50939	-1.59105	-1.73921	-1.84805	-1.93207
17.57	2.1e-07	2.94e-06	0.000105257	0.000647499	0.00161502	-1.51437	-1.59603	-1.74419	-1.85303	-1.93705
17.58	2.1e-07	2.94e-06	0.000105257	0.000647499	0.00161502	-1.51935	-1.60101	-1.74916	-1.858	-1.94203
17.59	2.1e-07	2.94e-06	0.000105257	0.000647499	0.00161502	-1.52433	-1.60599	-1.75414	-1.86298	-1.94701
17.6	2.1e-07	2.94e-06	0.000105257	0.000647499	0.00161502	-1.52931	-1.61097	-1.75912	-1.86795	-1.95199
17.61	2.1e-07	2.94e-06	0.000105257	0.000647499	0.00161502	-1.53429	-1.61595	-1.76409	-1.87292	-1.95697
17.62	2.1e-07	2.94e-06	0.000105257	0.000647499	0.00161502	-1.53927	-1.62093	-1.76907	-1.8779	-1.96195
17.63	2.1e-07	2.94e-06	0.000105257	0.000647499	0.00161502	-1.54425	-1.62591	-1.77405	-1.88287	-1.96693
17.64	2.1e-07	2.94e-06	0.000105257	0.000647499	0.00161502	-1.54923	-1.63089	-1.77902	-1.88785	-1.97191
17.65	2.1e-07	2.94e-06	0.000105257	0.000647499	0.00161502	-1.55421	-1.63587	-1.784	-1.89282	-1.97689
17.66	2.1e-07	2.94e-06	0.000105257	0.000647499	0.00161502	-1.55919	-1.64085	-1.78898	-1.8978	-1.98187
17.67	2.1e-07	2.94e-06	0.000105257	0.000647499	0.00161502	-1.56417	-1.64582	-1.79395	-1.90277	-1.98684
17.68	2.1e-07	2.94e-06	0.000105257	0.000647499	0.00161502	-1.56915	-1.6508	-1.79893	-1.90774	-1.99182
17.69	2.1e-07	2.94e-06	0.000105257	0.000647499	0.00161502	-1.57412	-1.65578	-1.80391	-1.91272	-1.9968
17.7	2.1e-07	2.94e-06	0.000105257	0.000647499	0.00161502	-1.5791	-1.66076	-1.80888	-1.91769	-2.00178
17.71	2.1e-07	2.94e-06	0.000105257	0.000647499	0.00161502	-1.58408	-1.66574	-1.81386	-1.92267	-2.00676
17.72	2.1e-07	2.94e-06	0.000105257	0.000647499	0.00161502	-1.58906	-1.67072	-1.81884	-1.92764	-2.01174
17.73	2.1e-07	2.94e-06	0.000105257	0.000647499	0.00161502	-1.59404	-1.6757	-1.82382	-1.93261	-2.01672
17.74	2.1e-07	2.94e-06	0.000105257	0.000647499	0.00161502	-1.59902	-1.68068	-1.82879	-1.93759	-2.0217
17.75	2.1e-07	2.94e-06	0.000105257	0.000647499	0.00161502	-1.604	-1.68566	-1.83377	-1.94256	-2.02668
17.76	2.1e-07	2.94e-06	0.000105257	0.000647499	0.00161502	-1.60898	-1.69064	-1.83875	-1.94754	-2.03166
17.77	2.1e-07	2.94e-06	0.000105257	0.000647499	0.00161502	-1.61396	-1.69562	-1.84372	-1.95251	-2.03664
17.78	2.1e-07	2.94e-06	0.000105257	0.000647499	0.00161502	-1.61894	-1.7006	-1.8487	-1.95749	-2.04162
17.79	2.1e-07	2.94e-06	0.000105257	0.000647499	0.00161502	-1.62392	-1.70558	-1.85368	-1.96246	-2.0466
17.8	2.1e-07	2.94e-06	0.000105257	0.000647499	0.00161502	-1.6289	-1.71055	-1.85865	-1.96743	-2.05158
17.81	2.1e-07	2.94e-06	0.000105257	0.000647499	0.00161502	-1.63388	-1.71553	-1.86363	-1.97241	-2.05656
17.82	2.1e-07	2.94e-06	0.000105257	0.000647499	0.00161502	-1.63886	-1.72051	-1.86861	-1.97738	-2.06154
17.83	2.1e-07	2.94e-06	0.000105257	0.000647499	0.00161502	-1.64384	-1.72549	-1.87358	-1.98236	-2.06652
17.84	2.1e-07	2.94e-06	0.000105257	0.000647499	0.00161502	-1.64882	-1.73047	-1.87856	-1.98733	-2.07149
17.85	2.1e-07	2.94e-06	0.000105257	0.000647499	0.00161502	-1.65379	-1.73545	-1.88354	-1.99231	-2.07647
17.86	2.1e-07	2.94e-06	0.000105257	0.000647499	0.00161502	-1.65877	-1.74043	-1.88851	-1.99728	-2.08145
17.87	2.1e-07	2.94e-06	0.000105257	0.000647499	0.00161502	-1.66375	-1.74541	-1.89349	-2.00225	-2.08643
17.88	2.1e-07	2.94e-06	0.000105257	0.000647499	0.00161502	-1.66873	-1.75039	-1.89847	-2.00723	-2.09141
17.89	2.1e-07	2.94e-06	0.000105257	0.000647499	0.00161502	-1.67371	-1.75537	-1.90345	-2.0122	-2.09639
17.9	2.1e-07	2.94e-06	0.000105257	0.000647499	0.00161502	-1.67869	-1.76035	-1.90842	-2.01718	-2.10137
17.91	2.1e-07	2.94e-06	0.000105257	0.000647499	0.00161502	-1.68367	-1.76533	-1.9134	-2.02215	-2.10635
17.92	2.1e-07	2.94e-06	0.000105257	0.000647499	0.00161502	-1.68865	-1.77031	-1.91838	-2.02712	-2.11133
17.93	2.1e-07	2.94e-06	0.000105257	0.000647499	0.00161502	-1.69363	-1.77528	-1.92335	-2.0321	-2.11631
17.94	2.1e-07	2.94e-06	0.000105257	0.000647499	0.00161502	-1.69861	-1.78026	-1.92833	-2.03707	-2.12129
17.95	2.1e-07	2.94e-06	0.000105257	0.000647499	0.00161502	-1.70359	-1.78524	-1.93331	-2.04205	-2.12627
17.96	2.1e-07	2.94e-06	0.000105257	0.000647499	0.00161502	-1.70857	-1.79022	-1.93828	-2.04702	-2.13125
17.97	2.1e-07	2.94e-06	0.000105257	0.000647499	0.00161502	-1.71355	-1.7952	-1.94326	-2.052	-2.13623
17.98	2.1e-07	2.94e-06	0.000105257	0.000647499	0.00161502	-1.71853	-1.80018	-1.94824	-2.05697	-2.14121
17.99	2.1e-07	2.94e-06	0.000105257	0.000647499	0.00161502	-1.72351	-1.80516	-1.95321	-2.06194	-2.14619
18	2.1e-07	2.94e-06	0.000105257	0.000647499	0.00161502	-1.72849	-1.81014	-1.95819	-2.06692	-2.15116
18.01	2.1e-07	2.94e-06	0.000105257	0.000647499	0.00161502	-1.73346	-1.81512	-1.96317	-2.07189	-2.15614
18.02	2.1e-07	2.94e-06	0.000105257	0.000647499	0.00161502	-1.73844	-1.8201	-1.96814	-2.07687	-2.16112
18.03	2.1e-07	2.94e-06	0.000105257	0.000647499	0.00161502	-1.74342	-1.82508	-1.97312	-2.08184	-2.1661
18.04	2.1e-07	2.94e-06	0.000105257	0.000647499	0.00161502	-1.7484	-1.83006	-1.9781	-2.08682	-2.17108
18.05	2.1e-07	2.94e-06	0.000105257	0.000647499	0.00161502	-1.75338	-1.83504	-1.98308	-2.09179	-2.17606
18.06	2.1e-07	2.94e-06	0.000105257	0.000647499	0.00161502	-1.75836	-1.84001	-1.98805	-2.09676	-2.18104
18.07	2.1e-07	2.94e-06	0.000105257	0.000647499	0.00161502	-1.76334	-1.84499	-1.99303	-2.10174	-2.18602
18.08	2.1e-07	2.94e-06	0.000105257	0.000647499	0.00161502	-1.76832	-1.84997	-1.99801	-2.10671	-2.191
18.09	2.1e-07	2.94e-06	0.000105257	0.000647499	0.00161502	-1.7733	-1.85495	-2.00298	-2.11169	-2.19598
18.1	2.1e-07	2.94e-06	0.000105257	0.000647499	0.00161502	-1.77828	-1.85993	-2.00796	-2.11666	-2.20096
18.11	2.1e-07	2.94e-06	0.000105257	0.000647499	0.00161502	-1.78326	-1.86491	-2.01294	-2.12163	-2.20594
18.12	2.1e-07	2.94e-06	0.000105257	0.000647499	0.00161502	-1.78824	-1.86989	-2.01791	-2.12661	-2.21092
18.13	2.1e-07	2.94e-06	0.000105257	0.000647499	0.00161502	-1.79322	-1.87487	-2.02289	-2.13158	-2.2159
18.14	2.1e-07	2.94e-06	0.000105257	0.000647499	0.00161502	-1.7982	-1.87985	-2.02787	-2.13656	-2.22088
18.15	2.1e-07	2.94e-06	0.000105257	0.000647499	0.00161502	-1.80318	-1.88483	-2.03284	-2.14153	-2.22586
18.16	2.1e-07	2.94e-06	0.000105257	0.000647499	0.00161502	-1.80816	-1.88981	-2.03782	-2.14651	-2.23084
18.17	2.1e-07	2.94e-06	0.000105257	0.000647499	0.00161502	-1.81314	-1.89479	-2.0428	-2.15148	-2.23581
18.18	2.1e-07	2.94e-06	0.000105257	0.000647499	0.00161502	-1.81811	-1.89977	-2.04777	-2.15645	-2.24079
18.19	2.1e-07	2.94e-06	0.000105257	0.000647499	0.00161502	-1.82309	-1.90474	-2.05275	-2.16143	-2.24577
18.2	2.1e-07	2.94e-06	0.000105257	0.000647499	0.00161502	-1.82807	-1.90972	-2.05773	-2.1664	-2.25075
18.21	2.1e-07	2.94e-06	0.000105257	0.000647499	0.00161502	-1.83305	-1.9147	-2.06271	-2.17138	-2.25573
18.22	2.1e-07	2.94e-06	0.000105257	0.000647499	0.00161502	-1.83803	-1.91968	-2.06768	-2.17635	-2.26071
18.23	2.1e-07	2.94e-06	0.000105257	0.000647499	0.00161502	-1.84301	-1.92466	-2.07266	-2.18133	-2.26569
18.24	2.1e-07	2.94e-06	0.000105257	0.000647499	0.00161502	-1.84799	-1.92964	-2.07764	-2.1863	-2.27067
18.25	2.1e-07	2.94e-06	0.000105257	0.000647499	0.00161502	-1.85297	-1.93462	-2.08261	-2.19127	-2.27565
18.26	2.1e-07	2.94e-06	0.000105257	0.000647499	0.00161502	-1.85795	-1.9396	-2.08759	-2.19625	-2.28063
18.27	2.1e-07	2.94e-06	0.000105257	0.000647499	0.00161502	-1.86293	-1.94458	-2.09257	-2.20122	-2.28561
18.28	2.1e-07	2.94e-06	0.000105257	0.000647499	0.00161502	-1.86791	-1.94956	-2.09754	-2.2062	-2.29059
18.29	2.1e-07	2.94e-06	0.000105257	0.000647499	0.00161502	-1.87289	-1.95454	-2.10252	-2.21117	-2.29557
18.3	2.1e-07	2.94e-06	0.000105257	0.000647499	0.00161502	-1.87787	-1.95952	-2.1075	-2.21615	-2.30055
18.31	2.1e-07	2.94e-06	0.000105257	0.000647499	0.00161502	-1.88285	-1.9645	-2.11247	-2.22112	-2.30553
18.32	2.1e-07	2.94e-06	0.000105257	0.000647499	0.00161502	-1.88783	-1.96947	-2.11745	-2.22609	-2.31051
18.33	2.1e-07	2.94e-06	0.000105257	0.000647499	0.00161502	-1.89281	-1.97445	-2.12243	-2.23107	-2.31548
18.34	2.1e-07	2.94e-06	0.000105257	0.000647499	0.00161502	-1.89778	-1.97943	-2.1274	-2.23604	-2.32046
18.35	2.1e-07	2.94e-06	0.000105257	0.000647499	0.00161502	-1.90276	-1.98441	-2.13238	-2.24102	-2.32544
18.36	2.1e-07	2.94e-06	0.000105257	0.000647499	0.00161502	-1.90774	-1.98939	-2.13736	-2.24599	-2.33042
18.37	2.1e-07	2.94e-06	0.000105257	0.000647499	0.00161502	-1.91272	-1.99437	-2.14234	-2.25096	-2.3354
18.38	2.1e-07	2.94e-06	0.000105257	0.000647499	0.00161502	-1.9177	-1.99935	-2.14731	-2.25594	-2.34038
18.39	2.1e-07	2.94e-06	0.000105257	0.000647499	0.00161502	-1.92268	-2.00433	-2.15229	-2.26091	-2.34536
18.4	2.1e-07	2.94e-06	0.000105257	0.000647499	0.00161502	-1.92766	-2.00931	-2.15727	-2.26589	-2.35034
18.41	2.1e-07	2.94e-06	0.000105257	0.000647499	0.00161502	-1.93264	-2.01429	-2.16224	-2.27086	-2.35532
18.42	2.1e-07	2.94e-06	0.000105257	0.000647499	0.00161502	-1.93762	-2.01927	-2.16722	-2.27584	-2.3603
18.43	2.1e-07	2.94e-06	0.000105257	0.000647499	0.00161502	-1.9426	-2.02425	-2.1722	-2.28081	-2.36528
18.44	2.1e-07	2.94e-06	0.000105257	0.000647499	0.00161502	-1.94758	-2.02923	-2.17717	-2.28578	-2.37026
18.45	2.1e-07	2.94e-06	0.000105257	0.000647499	0.00161502	-1.95256	-2.0342	-2.18215	-2.29076	-2.37524
18.46	2.1e-07	2.94e-06	0.000105257	0.000647499	0.00161502	-1.95754	-2.03918	-2.18713	-2.29573	-2.38022
18.47	2.1e-07	2.94e-06	0.000105257	0.000647499	0.00161502	-1.96252	-2.04416	-2.1921	-2.30071	-2.3852
18.48	2.1e-07	2.94e-06	0.000105257	0.000647499	0.00161502	-1.9675	-2.04914	-2.19708	-2.30568	-2.39018
18.49	2.1e-07	2.94e-06	0.000105257	0.000647499	0.00161502	-1.97248	-2.05412	-2.20206	-2.31066	-2.39516
18.5	2.1e-07	2.94e-06	0.000105257	0.000647499	0.00161502	-1.97745	-2.0591	-2.20703	-2.31563	-2.40013
18.51	2.1e-07	2.94e-06	0.000105257	0.000647499	0.00161502	-1.98243	-2.06408	-2.21201	-2.3206	-2.40511
18.52	2.1e-07	2.94e-06	0.000105257	0.000647499	0.00161502	-1.98741	-2.06906	-2.21699	-2.32558	-2.41009
18.53	2.1e-07	2.94e-06	0.000105257	0.000647499	0.00161502	-1.99239	-2.07404	-2.22197	-2.33055	-2.41507
18.54	2.1e-07	2.94e-06	0.000105257	0.000647499	0.00161502	-1.99737	-2.07902	-2.22694	-2.33553	-2.42005
18.55	2.1e-07	2.94e-06	0.000105257	0.000647499	0.00161502	-2.00235	-2.084	-2.23192	-2.3405	-2.42503
18.56	2.1e-07	2.94e-06	0.000105257	0.000647499	0.00161502	-2.00733	-2.08898	-2.2369	-2.34547	-2.43001
18.57	2.1e-07	2.94e-06	0.000105257	0.000647499	0.00161502	-2.01231	-2.09396	-2.24187	-2.35045	-2.43499
18.58	2.1e-07	2.94e-06	0.000105257	0.000647499	0.00161502	-2.01729	-2.09893	-2.24685	-2.35542	-2.43997
18.59	2.1e-07	2.94e-06	0.000105257	0.000647499	0.00161502	-2.02227	-2.10391	-2.25183	-2.3604	-2.44495
18.6	2.1e-07	2.94e-06	0.000105257	0.000647499	0.00161502	-2.02725	-2.10889	-2.2568	-2.36537	-2.44993
18.61	2.1e-07	2.94e-06	0.000105257	0.000647499	0.00161502	-2.03223	-2.11387	-2.26178	-2.37035	-2.45491
18.62	2.1e-07	2.94e-06	0.000105257	0.000647499	0.00161502	-2.03721	-2.11885	-2.26676	-2.37532	-2.45989
18.63	2.1e-07	2.94e-06	0.000105257	0.000647499	0.00161502	-2.04219	-2.12383	-2.27173	-2.38029	-2.46487
18.64	2.1e-07	2.94e-06	0.000105257	0.000647499	0.00161502	-2.04717	-2.12881	-2.27671	-2.38527	-2.46985
18.65	2.1e-07	2.94e-06	0.000105257	0.000647499	0.00161502	-2.05215	-2.13379	-2.28169	-2.39024	-2.47483
18.66	2.1e-07	2.94e-06	0.000105257	0.000647499	0.00161502	-2.05712	-2.13877	-2.28666	-2.39522	-2.4798
18.67	2.1e-07	2.94e-06	0.000105257	0.000647499	0.00161502	-2.0621	-2.14375	-2.29164	-2.40019	-2.48478
18.68	2.1e-07	2.94e-06	0.000105257	0.000647499	0.00161502	-2.06708	-2.14873	-2.29662	-2.40517	-2.48976
18.69	2.1e-07	2.94e-06	0.000105257	0.000647499	0.00161502	-2.07206	-2.15371	-2.30159	-2.41014	-2.49474
18.7	2.1e-07	2.94e-06	0.000105257	0.000647499	0.00161502	-2.07704	-2.15869	-2.30657	-2.41511	-2.49972
18.71	2.1e-07	2.94e-06	0.000105257	0.000647499	0.00161502	-2.08202	-2.16366	-2.31155	-2.42009	-2.5047
18.72	2.1e-07	2.94e-06	0.000105257	0.000647499	0.00161502	-2.087	-2.16864	-2.31653	-2.42506	-2.50968
18.73	2.1e-07	2.94e-06	0.000105257	0.000647499	0.00161502	-2.09198	-2.17362	-2.3215	-2.43004	-2.51466
18.74	2.1e-07	2.94e-06	0.000105257	0.000647499	0.00161502	-2.09696	-2.1786	-2.32648	-2.43501	-2.51964
18.75	2.1e-07	2.94e-06	0.000105257	0.000647499	0.00161502	-2.10194	-2.18358	-2.33146	-2.43998	-2.52462
18.76	2.1e-07	2.94e-06	0.000105257	0.000647499	0.00161502	-2.10692	-2.18856	-2.33643	-2.44496	-2.5296
18.77	2.1e-07	2.94e-06	0.000105257	0.000647499	0.00161502	-2.1119	-2.19354	-2.34141	-2.44993	-2.53458
18.78	2.1e-07	2.94e-06	0.000105257	0.000647499	0.00161502	-2.11688	-2.19852	-2.34639	-2.45491	-2.53956
18.79	2.1e-07	2.94e-06	0.000105257	0.000647499	0.00161502	-2.12186	-2.2035	-2.35136	-2.45988	-2.54454
18.8	2.1e-07	2.94e-06	0.000105257	0.000647499	0.00161502	-2.12684	-2.20848	-2.35634	-2.46486	-2.54952
18.81	2.1e-07	2.94e-06	0.000105257	0.000647499	0.00161502	-2.13182	-2.21346	-2.36132	-2.46983	-2.5545
18.82	2.1e-07	2.94e-06	0.000105257	0.000647499	0.00161502	-2.13679	-2.21844	-2.36629	-2.4748	-2.55948
18.83	2.1e-07	2.94e-06	0.000105257	0.000647499	0.00161502	-2.14177	-2.22342	-2.37127	-2.47978	-2.56445
18.84	2.1e-07	2.94e-06	0.000105257	0.000647499	0.00161502	-2.14675	-2.22839	-2.37625	-2.48475	-2.56943
18.85	2.1e-07	2.94e-06	0.000105257	0.000647499	0.00161502	-2.15173	-2.23337	-2.38122	-2.48973	-2.57441
18.86	2.1e-07	2.94e-06	0.000105257	0.000647499	0.00161502	-2.15671	-2.23835	-2.3862	-2.4947	-2.57939
18.87	2.1e-07	2.94e-06	0.000105257	0.000647499	0.00161502	-2.16169	-2.24333	-2.39118	-2.49968	-2.58437
18.88	2.1e-07	2.94e-06	0.000105257	0.000647499	0.00161502	-2.16667	-2.24831	-2.39616	-2.50465	-2.58935
18.89	2.1e-07	2.94e-06	0.000105257	0.000647499	0.00161502	-2.17165	-2.25329	-2.40113	-2.50962	-2.59433
18.9	2.1e-07	2.94e-06	0.000105257	0.000647499	0.00161502	-2.17663	-2.25827	-2.40611	-2.5146	-2.59931
18.91	2.1e-07	2.94e-06	0.000105257	0.000647499	0.00161502	-2.18161	-2.26325	-2.41109	-2.51957	-2.60429
18.92	2.1e-07	2.94e-06	0.000105257	0.000647499	0.00161502	-2.18659	-2.26823	-2.41606	-2.52455	-2.60927
18.93	2.1e-07	2.94e-06	0.000105257	0.000647499	0.00161502	-2.19157	-2.27321	-2.42104	-2.52952	-2.61425
18.94	2.1e-07	2.94e-06	0.000105257	0.000647499	0.00161502	-2.19655	-2.27819	-2.42602	-2.53449	-2.61923
18.95	2.1e-07	2.94e-06	0.000105257	0.000647499	0.00161502	-2.20153	-2.28317	-2.43099	-2.53947	-2.62421
18.96	2.1e-07	2.94e-06	0.000105257	0.000647499	0.00161502	-2.20651	-2.28815	-2.43597	-2.54444	-2.62919
18.97	2.1e-07	2.94e-06	0.000105257	0.000647499	0.00161502	-2.21149	-2.29312	-2.44095	-2.54942	-2.63417
18.98	2.1e-07	2.94e-06	0.000105257	0.000647499	0.00161502	-2.21646	-2.2981	-2.44592	-2.55439	-2.63915
18.99	2.1e-07	2.94e-06	0.000105257	0.000647499	0.00161502	-2.22144	-2.30308	-2.4509	-2.55937	-2.64412
19	2.1e-07	2.94e-06	0.000105257	0.000647499	0.00161502	-2.22642	-2.30806	-2.45588	-2.56434	-2.6491
19.01	2.1e-07	2.94e-06	0.000105257	0.000647499	0.00161502	-2.2314	-2.31304	-2.46085	-2.56931	-2.65408
19.02	2.1e-07	2.94e-06	0.000105257	0.000647499	0.00161502	-2.23638	-2.31802	-2.46583	-2.57429	-2.65906
19.03	2.1e-07	2.94e-06	0.000105257	0.000647499	0.00161502	-2.24136	-2.323	-2.47081	-2.57926	-2.66404
19.04	2.1e-07	2.94e-06	0.000105257	0.000647499	0.00161502	-2.24634	-2.32798	-2.47579	-2.58424	-2.66902
19.05	2.1e-07	2.94e-06	0.000105257	0.000647499	0.00161502	-2.25132	-2.33296	-2.48076	-2.58921	-2.674
19.06	2.1e-07	2.94e-06	0.000105257	0.000647499	0.00161502	-2.2563	-2.33794	-2.48574	-2.59419	-2.67898
19.07	2.1e-07	2.94e-06	0.000105257	0.000647499	0.00161502	-2.26128	-2.34292	-2.49072	-2.59916	-2.68396
19.08	2.1e-07	2.94e-06	0.000105257	0.000647499	0.00161502	-2.26626	-2.3479	-2.49569	-2.60413	-2.68894
19.09	2.1e-07	2.94e-06	0.000105257	0.000647499	0.00161502	-2.27124	-2.35288	-2.50067	-2.60911	-2.69392
19.1	2.1e-07	2.94e-06	0.000105257	0.000647499	0.00161502	-2.27622	-2.35785	-2.50565	-2.61408	-2.6989
19.11	2.1e-07	2.94e-06	0.000105257	0.000647499	0.00161502	-2.2812	-2.36283	-2.51062	-2.61906	-2.70388
19.12	2.1e-07	2.94e-06	0.000105257	0.000647499	0.00161502	-2.28618	-2.36781	-2.5156	-2.62403	-2.70886
19.13	2.1e-07	2.94e-06	0.000105257	0.000647499	0.00161502	-2.29116	-2.37279	-2.52058	-2.62901	-2.71384
19.14	2.1e-07	2.94e-06	0.000105257	0.000647499	0.00161502	-2.29613	-2.37777	-2.52555	-2.63398	-2.71882
19.15	2.1e-07	2.94e-06	0.000105257	0.000647499	0.00161502	-2.30111	-2.38275	-2.53053	-2.63895	-2.7238
19.16	2.1e-07	2.94e-06	0.000105257	0.000647499	0.00161502	-2.30609	-2.38773	-2.53551	-2.64393	-2.72877
19.17	2.1e-07	2.94e-06	0.000105257	0.000647499	0.00161502	-2.31107	-2.39271	-2.54048	-2.6489	-2.73375
19.18	2.1e-07	2.94e-06	0.000105257	0.000647499	0.00161502	-2.31605	-2.39769	-2.54546	-2.65388	-2.73873
19.19	2.1e-07	2.94e-06	0.000105257	0.000647499	0.00161502	-2.32103	-2.40267	-2.55044	-2.65885	-2.74371
19.2	2.1e-07	2.94e-06	0.000105257	0.000647499	0.00161502	-2.32601	-2.40765	-2.55542	-2.66382	-2.74869
19.21	2.1e-07	2.94e-06	0.000105257	0.000647499	0.00161502	-2.33099	-2.41263	-2.56039	-2.6688	-2.75367
19.22	2.1e-07	2.94e-06	0.000105257	0.000647499	0.00161502	-2.33597	-2.41761	-2.56537	-2.67377	-2.75865
19.23	2.1e-07	2.94e-06	0.000105257	0.000647499	0.00161502	-2.34095	-2.42258	-2.57035	-2.67875	-2.76363
19.24	2.1e-07	2.94e-06	0.000105257	0.000647499	0.00161502	-2.34593	-2.42756	-2.57532	-2.68372	-2.76861
19.25	2.1e-07	2.94e-06	0.000105257	0.000647499	0.00161502	-2.35091	-2.43254	-2.5803	-2.6887	-2.77359
19.26	2.1e-07	2.94e-06	0.000105257	0.000647499	0.00161502	-2.35589	-2.43752	-2.58528	-2.69367	-2.77857
19.27	2.1e-07	2.94e-06	0.000105257	0.000647499	0.00161502	-2.36087	-2.4425	-2.59025	-2.69864	-2.78355
19.28	2.1e-07	2.94e-06	0.000105257	0.000647499	0.00161502	-2.36585	-2.44748	-2.59523	-2.70362	-2.78853
19.29	2.1e-07	2.94e-06	0.000105257	0.000647499	0.00161502	-2.37083	-2.45246	-2.60021	-2.70859	-2.79351
19.3	2.1e-07	2.94e-06	0.000105257	0.000647499	0.00161502	-2.3758	-2.45744	-2.60518	-2.71357	-2.79849
19.31	2.1e-07	2.94e-06	0.000105257	0.000647499	0.00161502	-2.38078	-2.46242	-2.61016	-2.71854	-2.80347
19.32	2.1e-07	2.94e-06	0.000105257	0.000647499	0.00161502	-2.38576	-2.4674	-2.61514	-2.72352	-2.80844
19.33	2.1e-07	2.94e-06	0.000105257	0.000647499	0.00161502	-2.39074	-2.47238	-2.62011	-2.72849	-2.81342
19.34	2.1e-07	2.94e-06	0.000105257	0.000647499	0.00161502	-2.39572	-2.47736	-2.62509	-2.73346	-2.8184
19.35	2.1e-07	2.94e-06	0.000105257	0.000647499	0.00161502	-2.4007	-2.48234	-2.63007	-2.73844	-2.82338
19.36	2.1e-07	2.94e-06	0.000105257	0.000647499	0.00161502	-2.40568	-2.48731	-2.63505	-2.74341	-2.82836
19.37	2.1e-07	2.94e-06	0.000105257	0.000647499	0.00161502	-2.41066	-2.49229	-2.64002	-2.74839	-2.83334
19.38	2.1e-07	2.94e-06	0.000105257	0.000647499	0.00161502	-2.41564	-2.49727	-2.645	-2.75336	-2.83832
19.39	2.1e-07	2.94e-06	0.000105257	0.000647499	0.00161502	-2.42062	-2.50225	-2.64998	-2.75833	-2.8433
19.4	2.1e-07	2.94e-06	0.000105257	0.000647499	0.00161502	-2.4256	-2.50723	-2.65495	-2.76331	-2.84828
19.41	2.1e-07	2.94e-06	0.000105257	0.000647499	0.00161502	-2.43058	-2.51221	-2.65993	-2.76828	-2.85326
19.42	2.1e-07	2.94e-06	0.000105257	0.000647499	0.00161502	-2.43556	-2.51719	-2.66491	-2.77326	-2.85824
19.43	2.1e-07	2.94e-06	0.000105257	0.000647499	0.00161502	-2.44054	-2.52217	-2.66988	-2.77823	-2.86322
19.44	2.1e-07	2.94e-06	0.000105257	0.000647499	0.00161502	-2.44552	-2.52715	-2.67486	-2.78321	-2.8682
19.45	2.1e-07	2.94e-06	0.000105257	0.000647499	0.00161502	-2.4505	-2.53213	-2.67984	-2.78818	-2.87318
19.46	2.1e-07	2.94e-06	0.000105257	0.000647499	0.00161502	-2.45547	-2.53711	-2.68481	-2.79315	-2.87816
19.47	2.1e-07	2.94e-06	0.000105257	0.000647499	0.00161502	-2.46045	-2.54209	-2.68979	-2.79813	-2.88314
19.48	2.1e-07	2.94e-06	0.000105257	0.000647499	0.00161502	-2.46543	-2.54707	-2.69477	-2.8031	-2.88812
19.49	2.1e-07	2.94e-06	0.000105257	0.000647499	0.00161502	-2.47041	-2.55204	-2.69974	-2.80808	-2.89309
19.5	2.1e-07	2.94e-06	0.000105257	0.000647499	0.00161502	-2.47539	-2.55702	-2.70472	-2.81305	-2.89807
19.51	2.1e-07	2.94e-06	0.000105257	0.000647499	0.00161502	-2.48037	-2.562	-2.7097	-2.81803	-2.90305
19.52	2.1e-07	2.94e-06	0.000105257	0.000647499	0.00161502	-2.48535	-2.56698	-2.71468	-2.823	-2.90803
19.53	2.1e-07	2.94e-06	0.000105257	0.000647499	0.00161502	-2.49033	-2.57196	-2.71965	-2.82797	-2.91301
19.54	2.1e-07	2.94e-06	0.000105257	0.000647499	0.00161502	-2.49531	-2.57694	-2.72463	-2.83295	-2.91799
19.55	2.1e-07	2.94e-06	0.000105257	0.000647499	0.00161502	-2.50029	-2.58192	-2.72961	-2.83792	-2.92297
19.56	2.1e-07	2.94e-06	0.000105257	0.000647499	0.00161502	-2.50527	-2.5869	-2.73458	-2.8429	-2.92795
19.57	2.1e-07	2.94e-06	0.000105257	0.000647499	0.00161502	-2.51025	-2.59188	-2.73956	-2.84787	-2.93293
19.58	2.1e-07	2.94e-06	0.000105257	0.000647499	0.00161502	-2.51523	-2.59686	-2.74454	-2.85284	-2.93791
19.59	2.1e-07	2.94e-06	0.000105257	0.000647499	0.00161502	-2.52021	-2.60184	-2.74951	-2.85782	-2.94289
19.6	2.1e-07	2.94e-06	0.000105257	0.000647499	0.00161502	-2.52519	-2.60682	-2.75449	-2.86279	-2.94787
19.61	2.1e-07	2.94e-06	0.000105257	0.000647499	0.00161502	-2.53017	-2.6118	-2.75947	-2.86777	-2.95285
19.62	2.1e-07	2.94e-06	0.000105257	0.000647499	0.00161502	-2.53514	-2.61677	-2.76444	-2.87274	-2.95783
19.63	2.1e-07	2.94e-06	0.000105257	0.000647499	0.00161502	-2.54012	-2.62175	-2.76942	-2.87772	-2.96281
19.64	2.1e-07	2.94e-06	0.000105257	0.000647499	0.00161502	-2.5451	-2.62673	-2.7744	-2.88269	-2.96779
19.65	2.1e-07	2.94e-06	0.000105257	0.000647499	0.00161502	-2.55008	-2.63171	-2.77937	-2.88766	-2.97276
19.66	2.1e-07	2.94e-06	0.000105257	0.000647499	0.00161502	-2.55506	-2.63669	-2.78435	-2.89264	-2.97774
19.67	2.1e-07	2.94e-06	0.000105257	0.000647499	0.00161502	-2.56004	-2.64167	-2.78933	-2.89761	-2.98272
19.68	2.1e-07	2.94e-06	0.000105257	0.000647499	0.00161502	-2.56502	-2.64665	-2.79431	-2.90259	-2.9877
19.69	2.1e-07	2.94e-06	0.000105257	0.000647499	0.00161502	-2.57	-2.65163	-2.79928	-2.90756	-2.99268
19.7	2.1e-07	2.94e-06	0.000105257	0.000647499	0.00161502	-2.57498	-2.65661	-2.80426	-2.91254	-2.99766
19.71	2.1e-07	2.94e-06	0.000105257	0.000647499	0.00161502	-2.57996	-2.66159	-2.80924	-2.91751	-3.00264
19.72	2.1e-07	2.94e-06	0.000105257	0.000647499	0.00161502	-2.58494	-2.66657	-2.81421	-2.92248	-3.00762
19.73	2.1e-07	2.94e-06	0.000105257	0.000647499	0.00161502	-2.58992	-2.67155	-2.81919	-2.92746	-3.0126
19.74	2.1e-07	2.94e-06	0.000105257	0.000647499	0.00161502	-2.5949	-2.67653	-2.82417	-2.93243	-3.01758
19.75	2.1e-07	2.94e-06	0.000105257	0.000647499	0.00161502	-2.59988	-2.6815	-2.82914	-2.93741	-3.02256
19.76	2.1e-07	2.94e-06	0.000105257	0.000647499	0.00161502	-2.60486	-2.68648	-2.83412	-2.94238	-3.02754
19.77	2.1e-07	2.94e-06	0.000105257	0.000647499	0.00161502	-2.60984	-2.69146	-2.8391	-2.94735	-3.03252
19.78	2.1e-07	2.94e-06	0.000105257	0.000647499	0.00161502	-2.61481	-2.69644	-2.84407	-2.95233	-3.0375
19.79	2.1e-07	2.94e-06	0.000105257	0.000647499	0.00161502	-2.61979	-2.70142	-2.84905	-2.9573	-3.04248
19.8	2.1e-07	2.94e-06	0.000105257	0.000647499	0.00161502	-2.62477	-2.7064	-2.85403	-2.96228	-3.04746
19.81	2.1e-07	2.94e-06	0.000105257	0.000647499	0.00161502	-2.62975	-2.71138	-2.859	-2.96725	-3.05244
19.82	2.1e-07	2.94e-06	0.000105257	0.000647499	0.00161502	-2.63473	-2.71636	-2.86398	-2.97223	-3.05741
19.83	2.1e-07	2.94e-06	0.000105257	0.000647499	0.00161502	-2.63971	-2.72134	-2.86896	-2.9772	-3.06239
19.84	2.1e-07	2.94e-06	0.000105257	0.000647499	0.00161502	-2.64469	-2.72632	-2.87393	-2.98217	-3.06737
19.85	2.1e-07	2.94e-06	0.000105257	0.000647499	0.00161502	-2.64967	-2.7313	-2.87891	-2.98715	-3.07235
19.86	2.1e-07	2.94e-06	0.000105257	0.000647499	0.00161502	-2.65465	-2.73628	-2.88389	-2.99212	-3.07733
19.87	2.1e-07	2.94e-06	0.000105257	0.000647499	0.00161502	-2.65963	-2.74125	-2.88887	-2.9971	-3.08231
19.88	2.1e-07	2.94e-06	0.000105257	0.000647499	0.00161502	-2.66461	-2.74623	-2.89384	-3.00207	-3.08729
19.89	2.1e-07	2.94e-06	0.000105257	0.000647499	0.00161502	-2.66959	-2.75121	-2.89882	-3.00705	-3.09227
19.9	2.1e-07	2.94e-06	0.000105257	0.000647499	0.00161502	-2.67457	-2.75619	-2.9038	-3.01202	-3.09725
19.91	2.1e-07	2.94e-06	0.000105257	0.000647499	0.00161502	-2.67955	-2.76117	-2.90877	-3.01699	-3.10223
19.92	2.1e-07	2.94e-06	0.000105257	0.000647499	0.00161502	-2.68453	-2.76615	-2.91375	-3.02197	-3.10721
19.93	2.1e-07	2.94e-06	0.000105257	0.000647499	0.00161502	-2.68951	-2.77113	-2.91873	-3.02694	-3.11219
19.94	2.1e-07	2.94e-06	0.000105257	0.000647499	0.00161502	-2.69448	-2.77611	-2.9237	-3.03192	-3.11717
19.95	2.1e-07	2.94e-06	0.000105257	0.000647499	0.00161502	-2.69946	-2.78109	-2.92868	-3.03689	-3.12215
19.96	2.1e-07	2.94e-06	0.000105257	0.000647499	0.00161502	-2.70444	-2.78607	-2.93366	-3.04187	-3.12713
19.97	2.1e-07	2.94e-06	0.000105257	0.000647499	0.00161502	-2.70942	-2.79105	-2.93863	-3.04684	-3.13211
19.98	2.1e-07	2.94e-06	0.000105257	0.000647499	0.00161502	-2.7144	-2.79603	-2.94361	-3.05181	-3.13708
[truncated: 802 more rows]

## Sheet: B
Time	cell0	cell0.3	cell0.5	cell0.9	cell1	viral0	viral0.3	viral0.5	viral0.9	viral1
0	1	1	1	1	1	3.45637	3.45637	3.45637	3.45637	3.45637
0.01	0.99999	0.99999	0.99999	0.99999	0.99999	3.62119	3.62119	3.62119	3.62119	3.62119
0.02	0.999975	0.999975	0.999975	0.999975	0.999975	3.78602	3.78602	3.78602	3.78602	3.78602
0.03	0.999954	0.999954	0.999954	0.999954	0.999954	3.95084	3.95084	3.95084	3.95084	3.95084
0.04	0.999923	0.999923	0.999923	0.999923	0.999923	4.11566	4.11566	4.11566	4.11566	4.11566
0.05	0.999877	0.999877	0.999877	0.999877	0.999877	4.28047	4.28047	4.28047	4.28047	4.28047
0.06	0.99981	0.99981	0.99981	0.99981	0.99981	4.44527	4.44527	4.44527	4.44527	4.44527
0.07	0.999712	0.999712	0.999712	0.999712	0.999712	4.61006	4.61006	4.61006	4.61006	4.61006
0.08	0.999569	0.999569	0.999569	0.999569	0.999569	4.77483	4.77483	4.77483	4.77483	4.77483
0.09	0.99936	0.99936	0.99936	0.99936	0.99936	4.93957	4.93957	4.93957	4.93957	4.93957
0.1	0.999055	0.999055	0.999055	0.999055	0.999055	5.10426	5.10426	5.10426	5.10426	5.10426
0.11	0.998609	0.998609	0.998609	0.998609	0.998609	5.26889	5.26889	5.26889	5.26889	5.26889
0.12	0.997958	0.997958	0.997958	0.997958	0.997958	5.43344	5.43344	5.43344	5.43344	5.43344
0.13	0.997008	0.997008	0.997008	0.997008	0.997008	5.59784	5.59784	5.59784	5.59784	5.59784
0.14	0.995621	0.995621	0.995621	0.995621	0.995621	5.76206	5.76206	5.76206	5.76206	5.76206
0.15	0.993601	0.993601	0.993601	0.993601	0.993601	5.92598	5.92598	5.92598	5.92598	5.92598
0.16	0.99066	0.99066	0.99066	0.99066	0.99066	6.0895	6.0895	6.0895	6.0895	6.0895
0.17	0.986387	0.986387	0.986387	0.986387	0.986387	6.25241	6.25241	6.25241	6.25241	6.25241
0.18	0.980196	0.980196	0.980196	0.980196	0.980196	6.41445	6.41445	6.41445	6.41445	6.41445
0.19	0.971261	0.971261	0.971261	0.971261	0.971261	6.57522	6.57522	6.57522	6.57522	6.57522
0.2	0.958442	0.958442	0.958442	0.958442	0.958442	6.73416	6.73416	6.73416	6.73416	6.73416
0.21	0.940202	0.940202	0.940202	0.940202	0.940202	6.89051	6.89051	6.89051	6.89051	6.89051
0.22	0.914555	0.914555	0.914555	0.914555	0.914555	7.04316	7.04316	7.04316	7.04316	7.04316
0.23	0.8791	0.8791	0.8791	0.8791	0.8791	7.19065	7.19065	7.19065	7.19065	7.19065
0.24	0.831238	0.831238	0.831238	0.831238	0.831238	7.33109	7.33109	7.33109	7.33109	7.33109
0.25	0.768703	0.768703	0.768703	0.768703	0.768703	7.46213	7.46213	7.46213	7.46213	7.46213
0.26	0.690505	0.690505	0.690505	0.690505	0.690505	7.58112	7.58112	7.58112	7.58112	7.58112
0.27	0.598121	0.598121	0.598121	0.598121	0.598121	7.68544	7.68544	7.68544	7.68544	7.68544
0.28	0.49637	0.49637	0.49637	0.49637	0.49637	7.77301	7.77301	7.77301	7.77301	7.77301
0.29	0.393065	0.393065	0.393065	0.393065	0.393065	7.84287	7.84287	7.84287	7.84287	7.84287
0.3	0.296984	0.296984	0.296984	0.296984	0.296984	7.89559	7.89559	7.89559	7.89559	7.89559
0.31	0.215019	0.215019	0.215019	0.215019	0.215019	7.93314	7.93314	7.93314	7.93314	7.93314
0.32	0.150317	0.150317	0.150317	0.150317	0.150317	7.95832	7.95832	7.95832	7.95832	7.95832
0.33	0.102384	0.102384	0.102384	0.102384	0.102384	7.97411	7.97411	7.97411	7.97411	7.97411
0.34	0.0685268	0.0685268	0.0685268	0.0685268	0.0685268	7.98314	7.98314	7.98314	7.98314	7.98314
0.35	0.0453897	0.0453897	0.0453897	0.0453897	0.0453897	7.98749	7.98749	7.98749	7.98749	7.98749
0.36	0.0299102	0.0299102	0.0299102	0.0299102	0.0299102	7.98868	7.98868	7.98868	7.98868	7.98868
0.37	0.0196818	0.0196818	0.0196818	0.0196818	0.0196818	7.98777	7.98777	7.98777	7.98777	7.98777
0.38	0.0129652	0.0129652	0.0129652	0.0129652	0.0129652	7.98548	7.98548	7.98548	7.98548	7.98548
0.39	0.00856405	0.00856405	0.00856405	0.00856405	0.00856405	7.98228	7.98228	7.98228	7.98228	7.98228
0.4	0.00567827	0.00567827	0.00567827	0.00567827	0.00567827	7.97848	7.97848	7.97848	7.97848	7.97848
0.41	0.00378156	0.00378156	0.00378156	0.00378156	0.00378156	7.97428	7.97428	7.97428	7.97428	7.97428
0.42	0.00253055	0.00253055	0.00253055	0.00253055	0.00253055	7.96983	7.96983	7.96983	7.96983	7.96983
0.43	0.00170194	0.00170194	0.00170194	0.00170194	0.00170194	7.9652	7.9652	7.9652	7.9652	7.9652
0.44	0.00115056	0.00115056	0.00115056	0.00115056	0.00115056	7.96046	7.96046	7.96046	7.96046	7.96046
0.45	0.000781854	0.000781854	0.000781854	0.000781854	0.000781854	7.95565	7.95565	7.95565	7.95565	7.95565
0.46	0.000534068	0.000534068	0.000534068	0.000534068	0.000534068	7.95078	7.95078	7.95078	7.95078	7.95078
0.47	0.000366697	0.000366697	0.000366697	0.000366697	0.000366697	7.94587	7.94587	7.94587	7.94587	7.94587
0.48	0.000253068	0.000253068	0.000253068	0.000253068	0.000253068	7.94095	7.94095	7.94095	7.94095	7.94095
0.49	0.000175534	0.000175534	0.000175534	0.000175534	0.000175534	7.936	7.936	7.936	7.936	7.936
0.5	0.000122364	0.000122364	0.000122364	0.000122364	0.000122364	7.93105	7.93104	7.93103	7.93103	7.93102
0.51	8.57e-05	8.57e-05	8.57e-05	8.57e-05	8.57e-05	7.92609	7.92608	7.92606	7.92605	7.92604
0.52	6.03e-05	6.03e-05	6.03e-05	6.03e-05	6.03e-05	7.92112	7.9211	7.92108	7.92107	7.92107
0.53	4.27e-05	4.27e-05	4.27e-05	4.27e-05	4.27e-05	7.91615	7.91613	7.91611	7.91609	7.91609
0.54	3.03e-05	3.03e-05	3.03e-05	3.03e-05	3.03e-05	7.91118	7.91116	7.91113	7.91111	7.91111
0.55	2.17e-05	2.17e-05	2.17e-05	2.17e-05	2.17e-05	7.9062	7.90618	7.90615	7.90613	7.90613
0.56	1.55e-05	1.55e-05	1.55e-05	1.55e-05	1.55e-05	7.90123	7.9012	7.90117	7.90116	7.90115
0.57	1.12e-05	1.12e-05	1.12e-05	1.12e-05	1.12e-05	7.89625	7.89623	7.89619	7.89618	7.89617
0.58	8.09e-06	8.1e-06	8.1e-06	8.1e-06	8.1e-06	7.89127	7.89125	7.89121	7.8912	7.89119
0.59	5.88e-06	5.88e-06	5.88e-06	5.89e-06	5.89e-06	7.88629	7.88627	7.88623	7.88622	7.88621
0.6	4.29e-06	4.29e-06	4.3e-06	4.3e-06	4.3e-06	7.88132	7.88129	7.88126	7.88124	7.88123
0.61	3.15e-06	3.15e-06	3.15e-06	3.15e-06	3.15e-06	7.87634	7.87631	7.87628	7.87626	7.87625
0.62	2.32e-06	2.32e-06	2.32e-06	2.32e-06	2.32e-06	7.87136	7.87133	7.8713	7.87128	7.87127
0.63	1.71e-06	1.71e-06	1.71e-06	1.71e-06	1.71e-06	7.86638	7.86635	7.86632	7.8663	7.86629
0.64	1.27e-06	1.27e-06	1.27e-06	1.27e-06	1.27e-06	7.8614	7.86137	7.86134	7.86132	7.86131
0.65	9.46e-07	9.46e-07	9.47e-07	9.47e-07	9.47e-07	7.85642	7.85639	7.85636	7.85634	7.85633
0.66	7.07e-07	7.08e-07	7.08e-07	7.08e-07	7.08e-07	7.85144	7.85141	7.85138	7.85136	7.85135
0.67	5.31e-07	5.31e-07	5.31e-07	5.32e-07	5.32e-07	7.84646	7.84644	7.8464	7.84638	7.84637
0.68	4e-07	4e-07	4e-07	4.01e-07	4.01e-07	7.84148	7.84146	7.84142	7.8414	7.8414
0.69	3.03e-07	3.03e-07	3.03e-07	3.03e-07	3.03e-07	7.8365	7.83648	7.83644	7.83642	7.83642
0.7	2.3e-07	2.3e-07	2.3e-07	2.3e-07	2.3e-07	7.83152	7.8315	7.83146	7.83145	7.83144
0.71	1.75e-07	1.75e-07	1.75e-07	1.75e-07	1.75e-07	7.82654	7.82652	7.82648	7.82647	7.82646
0.72	1.34e-07	1.34e-07	1.34e-07	1.34e-07	1.34e-07	7.82156	7.82154	7.8215	7.82149	7.82148
0.73	1.03e-07	1.03e-07	1.03e-07	1.03e-07	1.03e-07	7.81659	7.81656	7.81652	7.81651	7.8165
0.74	7.91e-08	7.91e-08	7.91e-08	7.92e-08	7.92e-08	7.81161	7.81158	7.81154	7.81153	7.81152
0.75	6.11e-08	6.11e-08	6.11e-08	6.12e-08	6.12e-08	7.80663	7.8066	7.80657	7.80655	7.80654
0.76	4.73e-08	4.74e-08	4.74e-08	4.74e-08	4.74e-08	7.80165	7.80162	7.80159	7.80157	7.80156
0.77	3.68e-08	3.68e-08	3.69e-08	3.69e-08	3.69e-08	7.79667	7.79664	7.79661	7.79659	7.79658
0.78	2.87e-08	2.87e-08	2.88e-08	2.88e-08	2.88e-08	7.79169	7.79166	7.79163	7.79161	7.7916
0.79	2.25e-08	2.25e-08	2.25e-08	2.25e-08	2.25e-08	7.78671	7.78668	7.78665	7.78663	7.78662
0.8	1.77e-08	1.77e-08	1.77e-08	1.77e-08	1.77e-08	7.78173	7.7817	7.78167	7.78165	7.78164
0.81	1.39e-08	1.39e-08	1.39e-08	1.39e-08	1.39e-08	7.77675	7.77672	7.77669	7.77667	7.77666
0.82	1.1e-08	1.1e-08	1.1e-08	1.1e-08	1.1e-08	7.77177	7.77174	7.77171	7.77169	7.77168
0.83	8.71e-09	8.71e-09	8.72e-09	8.72e-09	8.72e-09	7.76679	7.76677	7.76673	7.76671	7.7667
0.84	6.92e-09	6.92e-09	6.93e-09	6.93e-09	6.93e-09	7.76181	7.76179	7.76175	7.76173	7.76172
0.85	5.52e-09	5.52e-09	5.52e-09	5.53e-09	5.53e-09	7.75683	7.75681	7.75677	7.75675	7.75675
0.86	4.41e-09	4.41e-09	4.42e-09	4.42e-09	4.42e-09	7.75185	7.75183	7.75179	7.75177	7.75177
0.87	3.54e-09	3.54e-09	3.54e-09	3.54e-09	3.54e-09	7.74687	7.74685	7.74681	7.7468	7.74679
0.88	2.84e-09	2.84e-09	2.85e-09	2.85e-09	2.85e-09	7.74189	7.74187	7.74183	7.74182	7.74181
0.89	2.29e-09	2.29e-09	2.3e-09	2.3e-09	2.3e-09	7.73692	7.73689	7.73685	7.73684	7.73683
0.9	1.85e-09	1.85e-09	1.86e-09	1.86e-09	1.86e-09	7.73194	7.73191	7.73187	7.73186	7.73185
0.91	1.5e-09	1.5e-09	1.5e-09	1.51e-09	1.51e-09	7.72696	7.72693	7.7269	7.72688	7.72687
0.92	1.22e-09	1.22e-09	1.22e-09	1.22e-09	1.22e-09	7.72198	7.72195	7.72192	7.7219	7.72189
0.93	9.95e-10	9.96e-10	9.97e-10	9.97e-10	9.98e-10	7.717	7.71697	7.71694	7.71692	7.71691
0.94	8.13e-10	8.14e-10	8.15e-10	8.15e-10	8.15e-10	7.71202	7.71199	7.71196	7.71194	7.71193
0.95	6.66e-10	6.67e-10	6.67e-10	6.68e-10	6.68e-10	7.70704	7.70701	7.70698	7.70696	7.70695
0.96	5.47e-10	5.47e-10	5.48e-10	5.48e-10	5.48e-10	7.70206	7.70203	7.702	7.70198	7.70197
0.97	4.5e-10	4.51e-10	4.51e-10	4.51e-10	4.52e-10	7.69708	7.69705	7.69702	7.697	7.69699
0.98	3.72e-10	3.72e-10	3.72e-10	3.73e-10	3.73e-10	7.6921	7.69207	7.69204	7.69202	7.69201
0.99	3.07e-10	3.08e-10	3.08e-10	3.08e-10	3.08e-10	7.68712	7.6871	7.68706	7.68704	7.68703
1	2.55e-10	2.55e-10	2.55e-10	2.56e-10	2.56e-10	7.68214	7.68212	7.68208	7.68206	7.68205
1.01	2.12e-10	2.12e-10	2.12e-10	2.12e-10	2.12e-10	7.67716	7.67714	7.6771	7.67708	7.67708
1.02	1.77e-10	1.77e-10	1.77e-10	1.77e-10	1.77e-10	7.67218	7.67216	7.67212	7.6721	7.6721
1.03	1.47e-10	1.48e-10	1.48e-10	1.48e-10	1.48e-10	7.6672	7.66718	7.66714	7.66713	7.66712
1.04	1.23e-10	1.23e-10	1.24e-10	1.24e-10	1.24e-10	7.66222	7.6622	7.66216	7.66215	7.66214
1.05	1.03e-10	1.04e-10	1.04e-10	1.04e-10	1.04e-10	7.65724	7.65722	7.65718	7.65717	7.65716
1.06	8.7e-11	8.7e-11	8.71e-11	8.72e-11	8.72e-11	7.65227	7.65224	7.6522	7.65219	7.65218
1.07	7.33e-11	7.33e-11	7.34e-11	7.35e-11	7.35e-11	7.64729	7.64726	7.64723	7.64721	7.6472
1.08	6.18e-11	6.19e-11	6.2e-11	6.2e-11	6.2e-11	7.64231	7.64228	7.64225	7.64223	7.64222
1.09	5.23e-11	5.24e-11	5.24e-11	5.25e-11	5.25e-11	7.63733	7.6373	7.63727	7.63725	7.63724
1.1	4.44e-11	4.44e-11	4.44e-11	4.45e-11	4.45e-11	7.63235	7.63232	7.63229	7.63227	7.63226
1.11	3.77e-11	3.77e-11	3.78e-11	3.78e-11	3.78e-11	7.62737	7.62734	7.62731	7.62729	7.62728
1.12	3.21e-11	3.21e-11	3.21e-11	3.22e-11	3.22e-11	7.62239	7.62236	7.62233	7.62231	7.6223
1.13	2.73e-11	2.74e-11	2.74e-11	2.74e-11	2.74e-11	7.61741	7.61738	7.61735	7.61733	7.61732
1.14	2.34e-11	2.34e-11	2.34e-11	2.34e-11	2.34e-11	7.61243	7.6124	7.61237	7.61235	7.61234
1.15	2e-11	2e-11	2.01e-11	2.01e-11	2.01e-11	7.60745	7.60742	7.60739	7.60737	7.60736
1.16	1.72e-11	1.72e-11	1.72e-11	1.72e-11	1.72e-11	7.60247	7.60245	7.60241	7.60239	7.60238
1.17	1.48e-11	1.48e-11	1.48e-11	1.48e-11	1.48e-11	7.59749	7.59747	7.59743	7.59741	7.5974
1.18	1.27e-11	1.27e-11	1.27e-11	1.27e-11	1.27e-11	7.59251	7.59249	7.59245	7.59243	7.59243
1.19	1.1e-11	1.1e-11	1.1e-11	1.1e-11	1.1e-11	7.58753	7.58751	7.58747	7.58745	7.58745
1.2	9.47e-12	9.48e-12	9.49e-12	9.5e-12	9.5e-12	7.58255	7.58253	7.58249	7.58248	7.58247
1.21	8.2e-12	8.21e-12	8.22e-12	8.23e-12	8.23e-12	7.57757	7.57755	7.57751	7.5775	7.57749
1.22	7.11e-12	7.12e-12	7.13e-12	7.13e-12	7.14e-12	7.5726	7.57257	7.57253	7.57252	7.57251
1.23	6.18e-12	6.19e-12	6.19e-12	6.2e-12	6.2e-12	7.56762	7.56759	7.56755	7.56754	7.56753
1.24	5.38e-12	5.38e-12	5.39e-12	5.39e-12	5.4e-12	7.56264	7.56261	7.56258	7.56256	7.56255
1.25	4.69e-12	4.69e-12	4.7e-12	4.7e-12	4.71e-12	7.55766	7.55763	7.5576	7.55758	7.55757
1.26	4.09e-12	4.1e-12	4.1e-12	4.11e-12	4.11e-12	7.55268	7.55265	7.55262	7.5526	7.55259
1.27	3.58e-12	3.58e-12	3.59e-12	3.59e-12	3.59e-12	7.5477	7.54767	7.54764	7.54762	7.54761
1.28	3.14e-12	3.14e-12	3.15e-12	3.15e-12	3.15e-12	7.54272	7.54269	7.54266	7.54264	7.54263
1.29	2.75e-12	2.76e-12	2.76e-12	2.76e-12	2.76e-12	7.53774	7.53771	7.53768	7.53766	7.53765
1.3	2.42e-12	2.42e-12	2.43e-12	2.43e-12	2.43e-12	7.53276	7.53273	7.5327	7.53268	7.53267
1.31	2.13e-12	2.13e-12	2.14e-12	2.14e-12	2.14e-12	7.52778	7.52775	7.52772	7.5277	7.52769
1.32	1.88e-12	1.88e-12	1.88e-12	1.88e-12	1.89e-12	7.5228	7.52278	7.52274	7.52272	7.52271
1.33	1.66e-12	1.66e-12	1.66e-12	1.66e-12	1.66e-12	7.51782	7.5178	7.51776	7.51774	7.51773
1.34	1.47e-12	1.47e-12	1.47e-12	1.47e-12	1.47e-12	7.51284	7.51282	7.51278	7.51276	7.51276
1.35	1.3e-12	1.3e-12	1.3e-12	1.3e-12	1.3e-12	7.50786	7.50784	7.5078	7.50778	7.50778
1.36	1.15e-12	1.15e-12	1.16e-12	1.16e-12	1.16e-12	7.50288	7.50286	7.50282	7.50281	7.5028
1.37	1.02e-12	1.02e-12	1.03e-12	1.03e-12	1.03e-12	7.4979	7.49788	7.49784	7.49783	7.49782
1.38	9.1e-13	9.11e-13	9.13e-13	9.14e-13	9.14e-13	7.49292	7.4929	7.49286	7.49285	7.49284
1.39	8.11e-13	8.12e-13	8.13e-13	8.14e-13	8.14e-13	7.48795	7.48792	7.48788	7.48787	7.48786
1.4	7.23e-13	7.24e-13	7.25e-13	7.26e-13	7.26e-13	7.48297	7.48294	7.48291	7.48289	7.48288
1.41	6.46e-13	6.47e-13	6.48e-13	6.49e-13	6.49e-13	7.47799	7.47796	7.47793	7.47791	7.4779
1.42	5.78e-13	5.79e-13	5.8e-13	5.8e-13	5.8e-13	7.47301	7.47298	7.47295	7.47293	7.47292
1.43	5.18e-13	5.18e-13	5.19e-13	5.2e-13	5.2e-13	7.46803	7.468	7.46797	7.46795	7.46794
1.44	4.64e-13	4.65e-13	4.66e-13	4.66e-13	4.66e-13	7.46305	7.46302	7.46299	7.46297	7.46296
1.45	4.17e-13	4.17e-13	4.18e-13	4.19e-13	4.19e-13	7.45807	7.45804	7.45801	7.45799	7.45798
1.46	3.75e-13	3.75e-13	3.76e-13	3.76e-13	3.77e-13	7.45309	7.45306	7.45303	7.45301	7.453
1.47	3.38e-13	3.38e-13	3.39e-13	3.39e-13	3.39e-13	7.44811	7.44808	7.44805	7.44803	7.44802
1.48	3.04e-13	3.05e-13	3.05e-13	3.06e-13	3.06e-13	7.44313	7.4431	7.44307	7.44305	7.44304
1.49	2.75e-13	2.75e-13	2.76e-13	2.76e-13	2.76e-13	7.43815	7.43813	7.43809	7.43807	7.43806
1.5	2.48e-13	2.49e-13	2.49e-13	2.49e-13	2.49e-13	7.43317	7.43315	7.43311	7.43309	7.43308
1.51	2.25e-13	2.25e-13	2.25e-13	2.26e-13	2.26e-13	7.42819	7.42817	7.42813	7.42811	7.42811
1.52	2.03e-13	2.04e-13	2.04e-13	2.04e-13	2.04e-13	7.42321	7.42319	7.42315	7.42313	7.42313
1.53	1.85e-13	1.85e-13	1.85e-13	1.85e-13	1.85e-13	7.41823	7.41821	7.41817	7.41816	7.41815
1.54	1.68e-13	1.68e-13	1.68e-13	1.68e-13	1.68e-13	7.41325	7.41323	7.41319	7.41318	7.41317
1.55	1.52e-13	1.53e-13	1.53e-13	1.53e-13	1.53e-13	7.40828	7.40825	7.40821	7.4082	7.40819
1.56	1.39e-13	1.39e-13	1.39e-13	1.39e-13	1.39e-13	7.4033	7.40327	7.40323	7.40322	7.40321
1.57	1.26e-13	1.27e-13	1.27e-13	1.27e-13	1.27e-13	7.39832	7.39829	7.39826	7.39824	7.39823
1.58	1.15e-13	1.15e-13	1.16e-13	1.16e-13	1.16e-13	7.39334	7.39331	7.39328	7.39326	7.39325
1.59	1.05e-13	1.05e-13	1.06e-13	1.06e-13	1.06e-13	7.38836	7.38833	7.3883	7.38828	7.38827
1.6	9.62e-14	9.63e-14	9.65e-14	9.66e-14	9.66e-14	7.38338	7.38335	7.38332	7.3833	7.38329
1.61	8.8e-14	8.82e-14	8.83e-14	8.84e-14	8.84e-14	7.3784	7.37837	7.37834	7.37832	7.37831
1.62	8.07e-14	8.08e-14	8.09e-14	8.1e-14	8.1e-14	7.37342	7.37339	7.37336	7.37334	7.37333
1.63	7.4e-14	7.41e-14	7.42e-14	7.43e-14	7.43e-14	7.36844	7.36841	7.36838	7.36836	7.36835
1.64	6.79e-14	6.8e-14	6.81e-14	6.82e-14	6.82e-14	7.36346	7.36343	7.3634	7.36338	7.36337
1.65	6.24e-14	6.25e-14	6.26e-14	6.27e-14	6.27e-14	7.35848	7.35846	7.35842	7.3584	7.35839
1.66	5.74e-14	5.75e-14	5.76e-14	5.76e-14	5.77e-14	7.3535	7.35348	7.35344	7.35342	7.35341
1.67	5.29e-14	5.29e-14	5.3e-14	5.31e-14	5.31e-14	7.34852	7.3485	7.34846	7.34844	7.34844
1.68	4.87e-14	4.88e-14	4.89e-14	4.89e-14	4.89e-14	7.34354	7.34352	7.34348	7.34346	7.34346
1.69	4.49e-14	4.5e-14	4.51e-14	4.51e-14	4.52e-14	7.33856	7.33854	7.3385	7.33849	7.33848
1.7	4.15e-14	4.16e-14	4.16e-14	4.17e-14	4.17e-14	7.33358	7.33356	7.33352	7.33351	7.3335
1.71	3.84e-14	3.84e-14	3.85e-14	3.85e-14	3.85e-14	7.3286	7.32858	7.32854	7.32853	7.32852
1.72	3.55e-14	3.55e-14	3.56e-14	3.56e-14	3.57e-14	7.32363	7.3236	7.32356	7.32355	7.32354
1.73	3.29e-14	3.29e-14	3.3e-14	3.3e-14	3.3e-14	7.31865	7.31862	7.31859	7.31857	7.31856
1.74	3.05e-14	3.05e-14	3.06e-14	3.06e-14	3.06e-14	7.31367	7.31364	7.31361	7.31359	7.31358
1.75	2.83e-14	2.83e-14	2.84e-14	2.84e-14	2.84e-14	7.30869	7.30866	7.30863	7.30861	7.3086
1.76	2.62e-14	2.63e-14	2.63e-14	2.64e-14	2.64e-14	7.30371	7.30368	7.30365	7.30363	7.30362
1.77	2.44e-14	2.44e-14	2.45e-14	2.45e-14	2.45e-14	7.29873	7.2987	7.29867	7.29865	7.29864
1.78	2.27e-14	2.27e-14	2.28e-14	2.28e-14	2.28e-14	7.29375	7.29372	7.29369	7.29367	7.29366
1.79	2.11e-14	2.12e-14	2.12e-14	2.12e-14	2.12e-14	7.28877	7.28874	7.28871	7.28869	7.28868
1.8	1.97e-14	1.97e-14	1.97e-14	1.98e-14	1.98e-14	7.28379	7.28376	7.28373	7.28371	7.2837
1.81	1.84e-14	1.84e-14	1.84e-14	1.84e-14	1.84e-14	7.27881	7.27878	7.27875	7.27873	7.27872
1.82	1.71e-14	1.72e-14	1.72e-14	1.72e-14	1.72e-14	7.27383	7.27381	7.27377	7.27375	7.27374
1.83	1.6e-14	1.6e-14	1.61e-14	1.61e-14	1.61e-14	7.26885	7.26883	7.26879	7.26877	7.26876
1.84	1.5e-14	1.5e-14	1.5e-14	1.5e-14	1.5e-14	7.26387	7.26385	7.26381	7.26379	7.26379
1.85	1.4e-14	1.4e-14	1.4e-14	1.41e-14	1.41e-14	7.25889	7.25887	7.25883	7.25881	7.25881
1.86	1.31e-14	1.31e-14	1.31e-14	1.32e-14	1.32e-14	7.25391	7.25389	7.25385	7.25384	7.25383
1.87	1.23e-14	1.23e-14	1.23e-14	1.23e-14	1.23e-14	7.24893	7.24891	7.24887	7.24886	7.24885
1.88	1.15e-14	1.15e-14	1.16e-14	1.16e-14	1.16e-14	7.24396	7.24393	7.24389	7.24388	7.24387
1.89	1.08e-14	1.08e-14	1.08e-14	1.09e-14	1.09e-14	7.23898	7.23895	7.23891	7.2389	7.23889
1.9	1.01e-14	1.02e-14	1.02e-14	1.02e-14	1.02e-14	7.234	7.23397	7.23394	7.23392	7.23391
1.91	9.54e-15	9.55e-15	9.57e-15	9.58e-15	9.58e-15	7.22902	7.22899	7.22896	7.22894	7.22893
1.92	8.97e-15	8.98e-15	9e-15	9.01e-15	9.01e-15	7.22404	7.22401	7.22398	7.22396	7.22395
1.93	8.44e-15	8.45e-15	8.47e-15	8.48e-15	8.48e-15	7.21906	7.21903	7.219	7.21898	7.21897
1.94	7.95e-15	7.96e-15	7.98e-15	7.99e-15	7.99e-15	7.21408	7.21405	7.21402	7.214	7.21399
1.95	7.49e-15	7.5e-15	7.52e-15	7.53e-15	7.53e-15	7.2091	7.20907	7.20904	7.20902	7.20901
1.96	7.07e-15	7.08e-15	7.09e-15	7.1e-15	7.1e-15	7.20412	7.20409	7.20406	7.20404	7.20403
1.97	6.67e-15	6.68e-15	6.69e-15	6.7e-15	6.7e-15	7.19914	7.19911	7.19908	7.19906	7.19905
1.98	6.3e-15	6.31e-15	6.32e-15	6.33e-15	6.33e-15	7.19416	7.19414	7.1941	7.19408	7.19407
1.99	5.95e-15	5.96e-15	5.98e-15	5.98e-15	5.99e-15	7.18918	7.18916	7.18912	7.1891	7.18909
2	5.63e-15	5.64e-15	5.65e-15	5.66e-15	5.66e-15	7.1842	7.18418	7.18414	7.18412	7.18412
2.01	5.33e-15	5.34e-15	5.35e-15	5.35e-15	5.36e-15	7.17922	7.1792	7.17916	7.17914	7.17914
2.02	5.05e-15	5.05e-15	5.07e-15	5.07e-15	5.07e-15	7.17424	7.17422	7.17418	7.17417	7.17416
2.03	4.78e-15	4.79e-15	4.8e-15	4.8e-15	4.81e-15	7.16926	7.16924	7.1692	7.16919	7.16918
2.04	4.53e-15	4.54e-15	4.55e-15	4.56e-15	4.56e-15	7.16428	7.16426	7.16422	7.16421	7.1642
2.05	4.3e-15	4.31e-15	4.32e-15	4.32e-15	4.32e-15	7.15931	7.15928	7.15924	7.15923	7.15922
2.06	4.08e-15	4.09e-15	4.1e-15	4.1e-15	4.11e-15	7.15433	7.1543	7.15427	7.15425	7.15424
2.07	3.88e-15	3.89e-15	3.89e-15	3.9e-15	3.9e-15	7.14935	7.14932	7.14929	7.14927	7.14926
2.08	3.69e-15	3.69e-15	3.7e-15	3.7e-15	3.71e-15	7.14437	7.14434	7.14431	7.14429	7.14428
2.09	3.51e-15	3.51e-15	3.52e-15	3.52e-15	3.53e-15	7.13939	7.13936	7.13933	7.13931	7.1393
2.1	3.34e-15	3.34e-15	3.35e-15	3.35e-15	3.35e-15	7.13441	7.13438	7.13435	7.13433	7.13432
2.11	3.18e-15	3.18e-15	3.19e-15	3.19e-15	3.19e-15	7.12943	7.1294	7.12937	7.12935	7.12934
2.12	3.03e-15	3.03e-15	3.04e-15	3.04e-15	3.04e-15	7.12445	7.12442	7.12439	7.12437	7.12436
2.13	2.89e-15	2.89e-15	2.9e-15	2.9e-15	2.9e-15	7.11947	7.11944	7.11941	7.11939	7.11938
2.14	2.75e-15	2.76e-15	2.76e-15	2.77e-15	2.77e-15	7.11449	7.11446	7.11443	7.11441	7.1144
2.15	2.63e-15	2.63e-15	2.64e-15	2.64e-15	2.64e-15	7.10951	7.10949	7.10945	7.10943	7.10942
2.16	2.51e-15	2.51e-15	2.52e-15	2.52e-15	2.52e-15	7.10453	7.10451	7.10447	7.10445	7.10444
2.17	2.4e-15	2.4e-15	2.41e-15	2.41e-15	2.41e-15	7.09955	7.09953	7.09949	7.09947	7.09947
2.18	2.29e-15	2.29e-15	2.3e-15	2.3e-15	2.3e-15	7.09457	7.09455	7.09451	7.09449	7.09449
2.19	2.19e-15	2.19e-15	2.2e-15	2.2e-15	2.2e-15	7.08959	7.08957	7.08953	7.08952	7.08951
2.2	2.1e-15	2.1e-15	2.1e-15	2.11e-15	2.11e-15	7.08461	7.08459	7.08455	7.08454	7.08453
2.21	2.01e-15	2.01e-15	2.01e-15	2.02e-15	2.02e-15	7.07964	7.07961	7.07957	7.07956	7.07955
2.22	1.92e-15	1.93e-15	1.93e-15	1.93e-15	1.93e-15	7.07466	7.07463	7.07459	7.07458	7.07457
2.23	1.84e-15	1.84e-15	1.85e-15	1.85e-15	1.85e-15	7.06968	7.06965	7.06962	7.0696	7.06959
2.24	1.77e-15	1.77e-15	1.77e-15	1.77e-15	1.78e-15	7.0647	7.06467	7.06464	7.06462	7.06461
2.25	1.69e-15	1.7e-15	1.7e-15	1.7e-15	1.7e-15	7.05972	7.05969	7.05966	7.05964	7.05963
2.26	1.63e-15	1.63e-15	1.63e-15	1.63e-15	1.63e-15	7.05474	7.05471	7.05468	7.05466	7.05465
2.27	1.56e-15	1.56e-15	1.57e-15	1.57e-15	1.57e-15	7.04976	7.04973	7.0497	7.04968	7.04967
2.28	1.5e-15	1.5e-15	1.51e-15	1.51e-15	1.51e-15	7.04478	7.04475	7.04472	7.0447	7.04469
2.29	1.44e-15	1.44e-15	1.45e-15	1.45e-15	1.45e-15	7.0398	7.03977	7.03974	7.03972	7.03971
2.3	1.39e-15	1.39e-15	1.39e-15	1.39e-15	1.39e-15	7.03482	7.03479	7.03476	7.03474	7.03473
2.31	1.33e-15	1.34e-15	1.34e-15	1.34e-15	1.34e-15	7.02984	7.02982	7.02978	7.02976	7.02975
2.32	1.28e-15	1.29e-15	1.29e-15	1.29e-15	1.29e-15	7.02486	7.02484	7.0248	7.02478	7.02477
2.33	1.24e-15	1.24e-15	1.24e-15	1.24e-15	1.24e-15	7.01988	7.01986	7.01982	7.0198	7.0198
2.34	1.19e-15	1.19e-15	1.19e-15	1.2e-15	1.2e-15	7.0149	7.01488	7.01484	7.01482	7.01482
2.35	1.15e-15	1.15e-15	1.15e-15	1.15e-15	1.15e-15	7.00992	7.0099	7.00986	7.00985	7.00984
2.36	1.11e-15	1.11e-15	1.11e-15	1.11e-15	1.11e-15	7.00494	7.00492	7.00488	7.00487	7.00486
2.37	1.07e-15	1.07e-15	1.07e-15	1.07e-15	1.07e-15	6.99996	6.99994	6.9999	6.99989	6.99988
2.38	1.03e-15	1.03e-15	1.03e-15	1.03e-15	1.03e-15	6.99499	6.99496	6.99492	6.99491	6.9949
2.39	9.93e-16	9.95e-16	9.97e-16	9.98e-16	9.99e-16	6.99001	6.98998	6.98995	6.98993	6.98992
2.4	9.59e-16	9.61e-16	9.63e-16	9.64e-16	9.64e-16	6.98503	6.985	6.98497	6.98495	6.98494
2.41	9.27e-16	9.28e-16	9.3e-16	9.31e-16	9.32e-16	6.98005	6.98002	6.97999	6.97997	6.97996
2.42	8.96e-16	8.97e-16	8.99e-16	9e-16	9e-16	6.97507	6.97504	6.97501	6.97499	6.97498
2.43	8.66e-16	8.67e-16	8.69e-16	8.7e-16	8.71e-16	6.97009	6.97006	6.97003	6.97001	6.97
2.44	8.37e-16	8.39e-16	8.41e-16	8.42e-16	8.42e-16	6.96511	6.96508	6.96505	6.96503	6.96502
2.45	8.1e-16	8.12e-16	8.13e-16	8.14e-16	8.15e-16	6.96013	6.9601	6.96007	6.96005	6.96004
2.46	7.84e-16	7.86e-16	7.87e-16	7.88e-16	7.89e-16	6.95515	6.95512	6.95509	6.95507	6.95506
2.47	7.6e-16	7.61e-16	7.62e-16	7.63e-16	7.64e-16	6.95017	6.95014	6.95011	6.95009	6.95008
2.48	7.36e-16	7.37e-16	7.39e-16	7.39e-16	7.4e-16	6.94519	6.94517	6.94513	6.94511	6.9451
2.49	7.13e-16	7.14e-16	7.16e-16	7.17e-16	7.17e-16	6.94021	6.94019	6.94015	6.94013	6.94012
2.5	6.91e-16	6.92e-16	6.94e-16	6.95e-16	6.95e-16	6.93523	6.93521	6.93517	6.93515	6.93515
2.51	6.7e-16	6.71e-16	6.73e-16	6.74e-16	6.74e-16	6.93025	6.93023	6.93019	6.93017	6.93017
2.52	6.5e-16	6.51e-16	6.53e-16	6.54e-16	6.54e-16	6.92527	6.92525	6.92521	6.9252	6.92519
2.53	6.31e-16	6.32e-16	6.34e-16	6.34e-16	6.35e-16	6.92029	6.92027	6.92023	6.92022	6.92021
2.54	6.13e-16	6.14e-16	6.15e-16	6.16e-16	6.16e-16	6.91532	6.91529	6.91525	6.91524	6.91523
2.55	5.95e-16	5.96e-16	5.97e-16	5.98e-16	5.98e-16	6.91034	6.91031	6.91027	6.91026	6.91025
2.56	5.78e-16	5.79e-16	5.8e-16	5.81e-16	5.81e-16	6.90536	6.90533	6.9053	6.90528	6.90527
2.57	5.62e-16	5.63e-16	5.64e-16	5.64e-16	5.65e-16	6.90038	6.90035	6.90032	6.9003	6.90029
2.58	5.46e-16	5.47e-16	5.48e-16	5.49e-16	5.49e-16	6.8954	6.89537	6.89534	6.89532	6.89531
2.59	5.31e-16	5.32e-16	5.33e-16	5.34e-16	5.34e-16	6.89042	6.89039	6.89036	6.89034	6.89033
2.6	5.16e-16	5.17e-16	5.18e-16	5.19e-16	5.19e-16	6.88544	6.88541	6.88538	6.88536	6.88535
2.61	5.02e-16	5.03e-16	5.04e-16	5.05e-16	5.05e-16	6.88046	6.88043	6.8804	6.88038	6.88037
2.62	4.89e-16	4.9e-16	4.91e-16	4.92e-16	4.92e-16	6.87548	6.87545	6.87542	6.8754	6.87539
2.63	4.76e-16	4.77e-16	4.78e-16	4.79e-16	4.79e-16	6.8705	6.87047	6.87044	6.87042	6.87041
2.64	4.64e-16	4.65e-16	4.66e-16	4.66e-16	4.66e-16	6.86552	6.8655	6.86546	6.86544	6.86543
2.65	4.52e-16	4.53e-16	4.54e-16	4.54e-16	4.54e-16	6.86054	6.86052	6.86048	6.86046	6.86045
2.66	4.4e-16	4.41e-16	4.42e-16	4.43e-16	4.43e-16	6.85556	6.85554	6.8555	6.85548	6.85548
2.67	4.29e-16	4.3e-16	4.31e-16	4.31e-16	4.32e-16	6.85058	6.85056	6.85052	6.8505	6.8505
2.68	4.19e-16	4.19e-16	4.2e-16	4.21e-16	4.21e-16	6.8456	6.84558	6.84554	6.84553	6.84552
2.69	4.08e-16	4.09e-16	4.1e-16	4.1e-16	4.11e-16	6.84062	6.8406	6.84056	6.84055	6.84054
2.7	3.98e-16	3.99e-16	4e-16	4e-16	4.01e-16	6.83564	6.83562	6.83558	6.83557	6.83556
2.71	3.89e-16	3.89e-16	3.9e-16	3.91e-16	3.91e-16	6.83067	6.83064	6.8306	6.83059	6.83058
2.72	3.8e-16	3.8e-16	3.81e-16	3.81e-16	3.82e-16	6.82569	6.82566	6.82563	6.82561	6.8256
2.73	3.71e-16	3.71e-16	3.72e-16	3.73e-16	3.73e-16	6.82071	6.82068	6.82065	6.82063	6.82062
2.74	3.62e-16	3.63e-16	3.63e-16	3.64e-16	3.64e-16	6.81573	6.8157	6.81567	6.81565	6.81564
2.75	3.54e-16	3.54e-16	3.55e-16	3.56e-16	3.56e-16	6.81075	6.81072	6.81069	6.81067	6.81066
2.76	3.46e-16	3.46e-16	3.47e-16	3.47e-16	3.48e-16	6.80577	6.80574	6.80571	6.80569	6.80568
2.77	3.38e-16	3.38e-16	3.39e-16	3.4e-16	3.4e-16	6.80079	6.80076	6.80073	6.80071	6.8007
2.78	3.3e-16	3.31e-16	3.32e-16	3.32e-16	3.32e-16	6.79581	6.79578	6.79575	6.79573	6.79572
2.79	3.23e-16	3.24e-16	3.24e-16	3.25e-16	3.25e-16	6.79083	6.7908	6.79077	6.79075	6.79074
2.8	3.16e-16	3.17e-16	3.17e-16	3.18e-16	3.18e-16	6.78585	6.78582	6.78579	6.78577	6.78576
2.81	3.09e-16	3.1e-16	3.11e-16	3.11e-16	3.11e-16	6.78087	6.78085	6.78081	6.78079	6.78078
2.82	3.03e-16	3.03e-16	3.04e-16	3.04e-16	3.05e-16	6.77589	6.77587	6.77583	6.77581	6.7758
2.83	2.96e-16	2.97e-16	2.98e-16	2.98e-16	2.98e-16	6.77091	6.77089	6.77085	6.77083	6.77083
2.84	2.9e-16	2.91e-16	2.92e-16	2.92e-16	2.92e-16	6.76593	6.76591	6.76587	6.76585	6.76585
2.85	2.84e-16	2.85e-16	2.86e-16	2.86e-16	2.86e-16	6.76095	6.76093	6.76089	6.76088	6.76087
2.86	2.79e-16	2.79e-16	2.8e-16	2.8e-16	2.8e-16	6.75597	6.75595	6.75591	6.7559	6.75589
2.87	2.73e-16	2.74e-16	2.74e-16	2.74e-16	2.75e-16	6.751	6.75097	6.75093	6.75092	6.75091
2.88	2.68e-16	2.68e-16	2.69e-16	2.69e-16	2.69e-16	6.74602	6.74599	6.74595	6.74594	6.74593
2.89	2.62e-16	2.63e-16	2.63e-16	2.64e-16	2.64e-16	6.74104	6.74101	6.74098	6.74096	6.74095
2.9	2.57e-16	2.58e-16	2.58e-16	2.59e-16	2.59e-16	6.73606	6.73603	6.736	6.73598	6.73597
2.91	2.52e-16	2.53e-16	2.53e-16	2.54e-16	2.54e-16	6.73108	6.73105	6.73102	6.731	6.73099
2.92	2.48e-16	2.48e-16	2.49e-16	2.49e-16	2.49e-16	6.7261	6.72607	6.72604	6.72602	6.72601
2.93	2.43e-16	2.43e-16	2.44e-16	2.44e-16	2.44e-16	6.72112	6.72109	6.72106	6.72104	6.72103
2.94	2.39e-16	2.39e-16	2.4e-16	2.4e-16	2.4e-16	6.71614	6.71611	6.71608	6.71606	6.71605
2.95	2.34e-16	2.35e-16	2.35e-16	2.35e-16	2.36e-16	6.71116	6.71113	6.7111	6.71108	6.71107
2.96	2.3e-16	2.3e-16	2.31e-16	2.31e-16	2.31e-16	6.70618	6.70615	6.70612	6.7061	6.70609
2.97	2.26e-16	2.26e-16	2.27e-16	2.27e-16	2.27e-16	6.7012	6.70118	6.70114	6.70112	6.70111
2.98	2.22e-16	2.22e-16	2.23e-16	2.23e-16	2.23e-16	6.69622	6.6962	6.69616	6.69614	6.69613
2.99	2.18e-16	2.18e-16	2.19e-16	2.19e-16	2.19e-16	6.69124	6.69122	6.69118	6.69116	6.69116
3	2.14e-16	2.15e-16	2.15e-16	2.15e-16	2.15e-16	6.68626	6.68624	6.6862	6.68618	6.68618
3.01	2.11e-16	2.11e-16	2.11e-16	2.12e-16	2.12e-16	6.68128	6.68126	6.68122	6.68121	6.6812
3.02	2.07e-16	2.07e-16	2.08e-16	2.08e-16	2.08e-16	6.6763	6.67628	6.67624	6.67623	6.67622
3.03	2.04e-16	2.04e-16	2.04e-16	2.05e-16	2.05e-16	6.67132	6.6713	6.67126	6.67125	6.67124
3.04	2e-16	2.01e-16	2.01e-16	2.01e-16	2.01e-16	6.66635	6.66632	6.66628	6.66627	6.66626
3.05	1.97e-16	1.97e-16	1.98e-16	1.98e-16	1.98e-16	6.66137	6.66134	6.66131	6.66129	6.66128
3.06	1.94e-16	1.94e-16	1.95e-16	1.95e-16	1.95e-16	6.65639	6.65636	6.65633	6.65631	6.6563
3.07	1.91e-16	1.91e-16	1.92e-16	1.92e-16	1.92e-16	6.65141	6.65138	6.65135	6.65133	6.65132
3.08	1.88e-16	1.88e-16	1.89e-16	1.89e-16	1.89e-16	6.64643	6.6464	6.64637	6.64635	6.64634
3.09	1.85e-16	1.85e-16	1.86e-16	1.86e-16	1.86e-16	6.64145	6.64142	6.64139	6.64137	6.64136
3.1	1.82e-16	1.82e-16	1.83e-16	1.83e-16	1.83e-16	6.63647	6.63644	6.63641	6.63639	6.63638
3.11	1.79e-16	1.8e-16	1.8e-16	1.8e-16	1.8e-16	6.63149	6.63146	6.63143	6.63141	6.6314
3.12	1.77e-16	1.77e-16	1.77e-16	1.77e-16	1.78e-16	6.62651	6.62648	6.62645	6.62643	6.62642
3.13	1.74e-16	1.74e-16	1.75e-16	1.75e-16	1.75e-16	6.62153	6.6215	6.62147	6.62145	6.62144
3.14	1.71e-16	1.72e-16	1.72e-16	1.72e-16	1.72e-16	6.61655	6.61653	6.61649	6.61647	6.61646
3.15	1.69e-16	1.69e-16	1.7e-16	1.7e-16	1.7e-16	6.61157	6.61155	6.61151	6.61149	6.61148
3.16	1.66e-16	1.67e-16	1.67e-16	1.67e-16	1.67e-16	6.60659	6.60657	6.60653	6.60651	6.60651
3.17	1.64e-16	1.64e-16	1.65e-16	1.65e-16	1.65e-16	6.60161	6.60159	6.60155	6.60153	6.60153
3.18	1.62e-16	1.62e-16	1.62e-16	1.63e-16	1.63e-16	6.59663	6.59661	6.59657	6.59656	6.59655
3.19	1.6e-16	1.6e-16	1.6e-16	1.6e-16	1.6e-16	6.59165	6.59163	6.59159	6.59158	6.59157
3.2	1.57e-16	1.58e-16	1.58e-16	1.58e-16	1.58e-16	6.58668	6.58665	6.58661	6.5866	6.58659
3.21	1.55e-16	1.55e-16	1.56e-16	1.56e-16	1.56e-16	6.5817	6.58167	6.58163	6.58162	6.58161
3.22	1.53e-16	1.53e-16	1.54e-16	1.54e-16	1.54e-16	6.57672	6.57669	6.57666	6.57664	6.57663
3.23	1.51e-16	1.51e-16	1.52e-16	1.52e-16	1.52e-16	6.57174	6.57171	6.57168	6.57166	6.57165
3.24	1.49e-16	1.49e-16	1.5e-16	1.5e-16	1.5e-16	6.56676	6.56673	6.5667	6.56668	6.56667
3.25	1.47e-16	1.47e-16	1.48e-16	1.48e-16	1.48e-16	6.56178	6.56175	6.56172	6.5617	6.56169
3.26	1.45e-16	1.46e-16	1.46e-16	1.46e-16	1.46e-16	6.5568	6.55677	6.55674	6.55672	6.55671
3.27	1.43e-16	1.44e-16	1.44e-16	1.44e-16	1.44e-16	6.55182	6.55179	6.55176	6.55174	6.55173
3.28	1.42e-16	1.42e-16	1.42e-16	1.42e-16	1.43e-16	6.54684	6.54681	6.54678	6.54676	6.54675
3.29	1.4e-16	1.4e-16	1.41e-16	1.41e-16	1.41e-16	6.54186	6.54183	6.5418	6.54178	6.54177
3.3	1.38e-16	1.38e-16	1.39e-16	1.39e-16	1.39e-16	6.53688	6.53686	6.53682	6.5368	6.53679
3.31	1.37e-16	1.37e-16	1.37e-16	1.37e-16	1.37e-16	6.5319	6.53188	6.53184	6.53182	6.53181
3.32	1.35e-16	1.35e-16	1.35e-16	1.36e-16	1.36e-16	6.52692	6.5269	6.52686	6.52684	6.52684
3.33	1.33e-16	1.34e-16	1.34e-16	1.34e-16	1.34e-16	6.52194	6.52192	6.52188	6.52186	6.52186
3.34	1.32e-16	1.32e-16	1.32e-16	1.32e-16	1.33e-16	6.51696	6.51694	6.5169	6.51689	6.51688
3.35	1.3e-16	1.3e-16	1.31e-16	1.31e-16	1.31e-16	6.51198	6.51196	6.51192	6.51191	6.5119
3.36	1.29e-16	1.29e-16	1.29e-16	1.29e-16	1.3e-16	6.507	6.50698	6.50694	6.50693	6.50692
3.37	1.27e-16	1.28e-16	1.28e-16	1.28e-16	1.28e-16	6.50203	6.502	6.50196	6.50195	6.50194
3.38	1.26e-16	1.26e-16	1.26e-16	1.27e-16	1.27e-16	6.49705	6.49702	6.49699	6.49697	6.49696
3.39	1.24e-16	1.25e-16	1.25e-16	1.25e-16	1.25e-16	6.49207	6.49204	6.49201	6.49199	6.49198
3.4	1.23e-16	1.23e-16	1.24e-16	1.24e-16	1.24e-16	6.48709	6.48706	6.48703	6.48701	6.487
3.41	1.22e-16	1.22e-16	1.22e-16	1.22e-16	1.23e-16	6.48211	6.48208	6.48205	6.48203	6.48202
3.42	1.21e-16	1.21e-16	1.21e-16	1.21e-16	1.21e-16	6.47713	6.4771	6.47707	6.47705	6.47704
3.43	1.19e-16	1.19e-16	1.2e-16	1.2e-16	1.2e-16	6.47215	6.47212	6.47209	6.47207	6.47206
3.44	1.18e-16	1.18e-16	1.18e-16	1.19e-16	1.19e-16	6.46717	6.46714	6.46711	6.46709	6.46708
3.45	1.17e-16	1.17e-16	1.17e-16	1.17e-16	1.17e-16	6.46219	6.46216	6.46213	6.46211	6.4621
3.46	1.16e-16	1.16e-16	1.16e-16	1.16e-16	1.16e-16	6.45721	6.45718	6.45715	6.45713	6.45712
3.47	1.14e-16	1.15e-16	1.15e-16	1.15e-16	1.15e-16	6.45223	6.45221	6.45217	6.45215	6.45214
3.48	1.13e-16	1.14e-16	1.14e-16	1.14e-16	1.14e-16	6.44725	6.44723	6.44719	6.44717	6.44716
3.49	1.12e-16	1.12e-16	1.13e-16	1.13e-16	1.13e-16	6.44227	6.44225	6.44221	6.44219	6.44219
3.5	1.11e-16	1.11e-16	1.12e-16	1.12e-16	1.12e-16	6.43729	6.43727	6.43723	6.43721	6.43721
3.51	1.1e-16	1.1e-16	1.1e-16	1.11e-16	1.11e-16	6.43231	6.43229	6.43225	6.43224	6.43223
3.52	1.09e-16	1.09e-16	1.09e-16	1.1e-16	1.1e-16	6.42733	6.42731	6.42727	6.42726	6.42725
3.53	1.08e-16	1.08e-16	1.08e-16	1.09e-16	1.09e-16	6.42236	6.42233	6.42229	6.42228	6.42227
3.54	1.07e-16	1.07e-16	1.07e-16	1.08e-16	1.08e-16	6.41738	6.41735	6.41731	6.4173	6.41729
3.55	1.06e-16	1.06e-16	1.06e-16	1.07e-16	1.07e-16	6.4124	6.41237	6.41234	6.41232	6.41231
3.56	1.05e-16	1.05e-16	1.05e-16	1.06e-16	1.06e-16	6.40742	6.40739	6.40736	6.40734	6.40733
3.57	1.04e-16	1.04e-16	1.05e-16	1.05e-16	1.05e-16	6.40244	6.40241	6.40238	6.40236	6.40235
3.58	1.03e-16	1.03e-16	1.04e-16	1.04e-16	1.04e-16	6.39746	6.39743	6.3974	6.39738	6.39737
3.59	1.02e-16	1.02e-16	1.03e-16	1.03e-16	1.03e-16	6.39248	6.39245	6.39242	6.3924	6.39239
3.6	1.01e-16	1.02e-16	1.02e-16	1.02e-16	1.02e-16	6.3875	6.38747	6.38744	6.38742	6.38741
3.61	1e-16	1.01e-16	1.01e-16	1.01e-16	1.01e-16	6.38252	6.38249	6.38246	6.38244	6.38243
3.62	9.96e-17	9.98e-17	1e-16	1e-16	1e-16	6.37754	6.37751	6.37748	6.37746	6.37745
3.63	9.88e-17	9.9e-17	9.92e-17	9.93e-17	9.94e-17	6.37256	6.37254	6.3725	6.37248	6.37247
3.64	9.8e-17	9.82e-17	9.84e-17	9.85e-17	9.86e-17	6.36758	6.36756	6.36752	6.3675	6.36749
3.65	9.72e-17	9.74e-17	9.76e-17	9.77e-17	9.78e-17	6.3626	6.36258	6.36254	6.36252	6.36252
3.66	9.64e-17	9.66e-17	9.68e-17	9.69e-17	9.7e-17	6.35762	6.3576	6.35756	6.35754	6.35754
3.67	9.56e-17	9.58e-17	9.6e-17	9.61e-17	9.62e-17	6.35264	6.35262	6.35258	6.35257	6.35256
3.68	9.49e-17	9.5e-17	9.53e-17	9.54e-17	9.54e-17	6.34766	6.34764	6.3476	6.34759	6.34758
3.69	9.41e-17	9.43e-17	9.45e-17	9.46e-17	9.47e-17	6.34268	6.34266	6.34262	6.34261	6.3426
3.7	9.34e-17	9.36e-17	9.38e-17	9.39e-17	9.4e-17	6.33771	6.33768	6.33764	6.33763	6.33762
3.71	9.27e-17	9.29e-17	9.31e-17	9.32e-17	9.32e-17	6.33273	6.3327	6.33267	6.33265	6.33264
3.72	9.2e-17	9.22e-17	9.24e-17	9.25e-17	9.25e-17	6.32775	6.32772	6.32769	6.32767	6.32766
3.73	9.13e-17	9.15e-17	9.17e-17	9.18e-17	9.19e-17	6.32277	6.32274	6.32271	6.32269	6.32268
3.74	9.06e-17	9.08e-17	9.1e-17	9.11e-17	9.12e-17	6.31779	6.31776	6.31773	6.31771	6.3177
3.75	9e-17	9.01e-17	9.03e-17	9.05e-17	9.05e-17	6.31281	6.31278	6.31275	6.31273	6.31272
3.76	8.93e-17	8.95e-17	8.97e-17	8.98e-17	8.99e-17	6.30783	6.3078	6.30777	6.30775	6.30774
3.77	8.87e-17	8.88e-17	8.91e-17	8.92e-17	8.92e-17	6.30285	6.30282	6.30279	6.30277	6.30276
3.78	8.81e-17	8.82e-17	8.84e-17	8.85e-17	8.86e-17	6.29787	6.29784	6.29781	6.29779	6.29778
3.79	8.74e-17	8.76e-17	8.78e-17	8.79e-17	8.8e-17	6.29289	6.29286	6.29283	6.29281	6.2928
3.8	8.68e-17	8.7e-17	8.72e-17	8.73e-17	8.74e-17	6.28791	6.28789	6.28785	6.28783	6.28782
3.81	8.63e-17	8.64e-17	8.66e-17	8.67e-17	8.68e-17	6.28293	6.28291	6.28287	6.28285	6.28284
3.82	8.57e-17	8.58e-17	8.6e-17	8.61e-17	8.62e-17	6.27795	6.27793	6.27789	6.27787	6.27787
3.83	8.51e-17	8.53e-17	8.55e-17	8.56e-17	8.56e-17	6.27297	6.27295	6.27291	6.27289	6.27289
3.84	8.45e-17	8.47e-17	8.49e-17	8.5e-17	8.5e-17	6.26799	6.26797	6.26793	6.26792	6.26791
3.85	8.4e-17	8.41e-17	8.43e-17	8.44e-17	8.45e-17	6.26301	6.26299	6.26295	6.26294	6.26293
3.86	8.35e-17	8.36e-17	8.38e-17	8.39e-17	8.4e-17	6.25804	6.25801	6.25797	6.25796	6.25795
3.87	8.29e-17	8.31e-17	8.33e-17	8.34e-17	8.34e-17	6.25306	6.25303	6.25299	6.25298	6.25297
3.88	8.24e-17	8.25e-17	8.27e-17	8.28e-17	8.29e-17	6.24808	6.24805	6.24802	6.248	6.24799
3.89	8.19e-17	8.2e-17	8.22e-17	8.23e-17	8.24e-17	6.2431	6.24307	6.24304	6.24302	6.24301
3.9	8.14e-17	8.15e-17	8.17e-17	8.18e-17	8.19e-17	6.23812	6.23809	6.23806	6.23804	6.23803
3.91	8.09e-17	8.1e-17	8.12e-17	8.13e-17	8.14e-17	6.23314	6.23311	6.23308	6.23306	6.23305
3.92	8.04e-17	8.05e-17	8.07e-17	8.08e-17	8.09e-17	6.22816	6.22813	6.2281	6.22808	6.22807
3.93	7.99e-17	8.01e-17	8.03e-17	8.04e-17	8.04e-17	6.22318	6.22315	6.22312	6.2231	6.22309
3.94	7.95e-17	7.96e-17	7.98e-17	7.99e-17	7.99e-17	6.2182	6.21817	6.21814	6.21812	6.21811
3.95	7.9e-17	7.91e-17	7.93e-17	7.94e-17	7.95e-17	6.21322	6.21319	6.21316	6.21314	6.21313
3.96	7.85e-17	7.87e-17	7.89e-17	7.9e-17	7.9e-17	6.20824	6.20822	6.20818	6.20816	6.20815
3.97	7.81e-17	7.82e-17	7.84e-17	7.85e-17	7.86e-17	6.20326	6.20324	6.2032	6.20318	6.20317
3.98	7.77e-17	7.78e-17	7.8e-17	7.81e-17	7.81e-17	6.19828	6.19826	6.19822	6.1982	6.1982
3.99	7.72e-17	7.74e-17	7.76e-17	7.76e-17	7.77e-17	6.1933	6.19328	6.19324	6.19322	6.19322
4	7.68e-17	7.69e-17	7.71e-17	7.72e-17	7.73e-17	6.18832	6.1883	6.18826	6.18825	6.18824
4.01	7.64e-17	7.65e-17	7.67e-17	7.68e-17	7.69e-17	6.18334	6.18332	6.18328	6.18327	6.18326
4.02	7.6e-17	7.61e-17	7.63e-17	7.64e-17	7.64e-17	6.17836	6.17834	6.1783	6.17829	6.17828
4.03	7.56e-17	7.57e-17	7.59e-17	7.6e-17	7.6e-17	6.17339	6.17336	6.17332	6.17331	6.1733
4.04	7.52e-17	7.53e-17	7.55e-17	7.56e-17	7.56e-17	6.16841	6.16838	6.16835	6.16833	6.16832
4.05	7.48e-17	7.49e-17	7.51e-17	7.52e-17	7.52e-17	6.16343	6.1634	6.16337	6.16335	6.16334
4.06	7.44e-17	7.45e-17	7.47e-17	7.48e-17	7.49e-17	6.15845	6.15842	6.15839	6.15837	6.15836
4.07	7.4e-17	7.42e-17	7.43e-17	7.44e-17	7.45e-17	6.15347	6.15344	6.15341	6.15339	6.15338
4.08	7.37e-17	7.38e-17	7.4e-17	7.41e-17	7.41e-17	6.14849	6.14846	6.14843	6.14841	6.1484
4.09	7.33e-17	7.34e-17	7.36e-17	7.37e-17	7.37e-17	6.14351	6.14348	6.14345	6.14343	6.14342
4.1	7.29e-17	7.31e-17	7.33e-17	7.33e-17	7.34e-17	6.13853	6.1385	6.13847	6.13845	6.13844
4.11	7.26e-17	7.27e-17	7.29e-17	7.3e-17	7.3e-17	6.13355	6.13352	6.13349	6.13347	6.13346
4.12	7.22e-17	7.24e-17	7.26e-17	7.26e-17	7.27e-17	6.12857	6.12854	6.12851	6.12849	6.12848
4.13	7.19e-17	7.2e-17	7.22e-17	7.23e-17	7.23e-17	6.12359	6.12357	6.12353	6.12351	6.1235
4.14	7.16e-17	7.17e-17	7.19e-17	7.2e-17	7.2e-17	6.11861	6.11859	6.11855	6.11853	6.11852
4.15	7.12e-17	7.14e-17	7.15e-17	7.16e-17	7.17e-17	6.11363	6.11361	6.11357	6.11355	6.11355
4.16	7.09e-17	7.1e-17	7.12e-17	7.13e-17	7.13e-17	6.10865	6.10863	6.10859	6.10857	6.10857
4.17	7.06e-17	7.07e-17	7.09e-17	7.1e-17	7.1e-17	6.10367	6.10365	6.10361	6.1036	6.10359
4.18	7.03e-17	7.04e-17	7.06e-17	7.07e-17	7.07e-17	6.09869	6.09867	6.09863	6.09862	6.09861
4.19	7e-17	7.01e-17	7.03e-17	7.04e-17	7.04e-17	6.09372	6.09369	6.09365	6.09364	6.09363
4.2	6.97e-17	6.98e-17	7e-17	7e-17	7.01e-17	6.08874	6.08871	6.08867	6.08866	6.08865
4.21	6.94e-17	6.95e-17	6.97e-17	6.97e-17	6.98e-17	6.08376	6.08373	6.0837	6.08368	6.08367
4.22	6.91e-17	6.92e-17	6.94e-17	6.94e-17	6.95e-17	6.07878	6.07875	6.07872	6.0787	6.07869
4.23	6.88e-17	6.89e-17	6.91e-17	6.92e-17	6.92e-17	6.0738	6.07377	6.07374	6.07372	6.07371
4.24	6.85e-17	6.86e-17	6.88e-17	6.89e-17	6.89e-17	6.06882	6.06879	6.06876	6.06874	6.06873
4.25	6.82e-17	6.83e-17	6.85e-17	6.86e-17	6.86e-17	6.06384	6.06381	6.06378	6.06376	6.06375
4.26	6.79e-17	6.81e-17	6.82e-17	6.83e-17	6.83e-17	6.05886	6.05883	6.0588	6.05878	6.05877
4.27	6.77e-17	6.78e-17	6.79e-17	6.8e-17	6.81e-17	6.05388	6.05385	6.05382	6.0538	6.05379
4.28	6.74e-17	6.75e-17	6.77e-17	6.78e-17	6.78e-17	6.0489	6.04887	6.04884	6.04882	6.04881
4.29	6.71e-17	6.73e-17	6.74e-17	6.75e-17	6.75e-17	6.04392	6.0439	6.04386	6.04384	6.04383
4.3	6.69e-17	6.7e-17	6.72e-17	6.72e-17	6.73e-17	6.03894	6.03892	6.03888	6.03886	6.03885
4.31	6.66e-17	6.67e-17	6.69e-17	6.7e-17	6.7e-17	6.03396	6.03394	6.0339	6.03388	6.03388
4.32	6.64e-17	6.65e-17	6.66e-17	6.67e-17	6.68e-17	6.02898	6.02896	6.02892	6.0289	6.0289
4.33	6.61e-17	6.62e-17	6.64e-17	6.65e-17	6.65e-17	6.024	6.02398	6.02394	6.02393	6.02392
4.34	6.59e-17	6.6e-17	6.61e-17	6.62e-17	6.63e-17	6.01902	6.019	6.01896	6.01895	6.01894
4.35	6.56e-17	6.57e-17	6.59e-17	6.6e-17	6.6e-17	6.01404	6.01402	6.01398	6.01397	6.01396
4.36	6.54e-17	6.55e-17	6.57e-17	6.57e-17	6.58e-17	6.00907	6.00904	6.009	6.00899	6.00898
4.37	6.52e-17	6.53e-17	6.54e-17	6.55e-17	6.55e-17	6.00409	6.00406	6.00403	6.00401	6.004
4.38	6.49e-17	6.5e-17	6.52e-17	6.53e-17	6.53e-17	5.99911	5.99908	5.99905	5.99903	5.99902
4.39	6.47e-17	6.48e-17	6.5e-17	6.5e-17	6.51e-17	5.99413	5.9941	5.99407	5.99405	5.99404
4.4	6.45e-17	6.46e-17	6.47e-17	6.48e-17	6.49e-17	5.98915	5.98912	5.98909	5.98907	5.98906
4.41	6.42e-17	6.44e-17	6.45e-17	6.46e-17	6.46e-17	5.98417	5.98414	5.98411	5.98409	5.98408
4.42	6.4e-17	6.41e-17	6.43e-17	6.44e-17	6.44e-17	5.97919	5.97916	5.97913	5.97911	5.9791
4.43	6.38e-17	6.39e-17	6.41e-17	6.42e-17	6.42e-17	5.97421	5.97418	5.97415	5.97413	5.97412
4.44	6.36e-17	6.37e-17	6.39e-17	6.4e-17	6.4e-17	5.96923	5.9692	5.96917	5.96915	5.96914
4.45	6.34e-17	6.35e-17	6.37e-17	6.37e-17	6.38e-17	5.96425	5.96422	5.96419	5.96417	5.96416
4.46	6.32e-17	6.33e-17	6.35e-17	6.35e-17	6.36e-17	5.95927	5.95925	5.95921	5.95919	5.95918
4.47	6.3e-17	6.31e-17	6.33e-17	6.33e-17	6.34e-17	5.95429	5.95427	5.95423	5.95421	5.9542
4.48	6.28e-17	6.29e-17	6.31e-17	6.31e-17	6.32e-17	5.94931	5.94929	5.94925	5.94923	5.94923
4.49	6.26e-17	6.27e-17	6.29e-17	6.29e-17	6.3e-17	5.94433	5.94431	5.94427	5.94425	5.94425
4.5	6.24e-17	6.25e-17	6.27e-17	6.27e-17	6.28e-17	5.93935	5.93933	5.93929	5.93928	5.93927
4.51	6.22e-17	6.23e-17	6.25e-17	6.25e-17	6.26e-17	5.93437	5.93435	5.93431	5.9343	5.93429
4.52	6.2e-17	6.21e-17	6.23e-17	6.24e-17	6.24e-17	5.9294	5.92937	5.92933	5.92932	5.92931
4.53	6.18e-17	6.2e-17	6.21e-17	6.22e-17	6.22e-17	5.92442	5.92439	5.92435	5.92434	5.92433
4.54	6.17e-17	6.18e-17	6.19e-17	6.2e-17	6.2e-17	5.91944	5.91941	5.91938	5.91936	5.91935
4.55	6.15e-17	6.16e-17	6.17e-17	6.18e-17	6.18e-17	5.91446	5.91443	5.9144	5.91438	5.91437
4.56	6.13e-17	6.14e-17	6.16e-17	6.16e-17	6.17e-17	5.90948	5.90945	5.90942	5.9094	5.90939
4.57	6.11e-17	6.12e-17	6.14e-17	6.15e-17	6.15e-17	5.9045	5.90447	5.90444	5.90442	5.90441
4.58	6.1e-17	6.11e-17	6.12e-17	6.13e-17	6.13e-17	5.89952	5.89949	5.89946	5.89944	5.89943
4.59	6.08e-17	6.09e-17	6.1e-17	6.11e-17	6.12e-17	5.89454	5.89451	5.89448	5.89446	5.89445
4.6	6.06e-17	6.07e-17	6.09e-17	6.09e-17	6.1e-17	5.88956	5.88953	5.8895	5.88948	5.88947
4.61	6.05e-17	6.06e-17	6.07e-17	6.08e-17	6.08e-17	5.88458	5.88455	5.88452	5.8845	5.88449
4.62	6.03e-17	6.04e-17	6.05e-17	6.06e-17	6.07e-17	5.8796	5.87958	5.87954	5.87952	5.87951
4.63	6.01e-17	6.02e-17	6.04e-17	6.05e-17	6.05e-17	5.87462	5.8746	5.87456	5.87454	5.87453
4.64	6e-17	6.01e-17	6.02e-17	6.03e-17	6.03e-17	5.86964	5.86962	5.86958	5.86956	5.86956
4.65	5.98e-17	5.99e-17	6.01e-17	6.01e-17	6.02e-17	5.86466	5.86464	5.8646	5.86458	5.86458
4.66	5.97e-17	5.98e-17	5.99e-17	6e-17	6e-17	5.85968	5.85966	5.85962	5.85961	5.8596
4.67	5.95e-17	5.96e-17	5.98e-17	5.98e-17	5.99e-17	5.8547	5.85468	5.85464	5.85463	5.85462
4.68	5.94e-17	5.95e-17	5.96e-17	5.97e-17	5.97e-17	5.84972	5.8497	5.84966	5.84965	5.84964
4.69	5.92e-17	5.93e-17	5.95e-17	5.95e-17	5.96e-17	5.84475	5.84472	5.84468	5.84467	5.84466
4.7	5.91e-17	5.92e-17	5.93e-17	5.94e-17	5.94e-17	5.83977	5.83974	5.83971	5.83969	5.83968
4.71	5.89e-17	5.9e-17	5.92e-17	5.92e-17	5.93e-17	5.83479	5.83476	5.83473	5.83471	5.8347
4.72	5.88e-17	5.89e-17	5.9e-17	5.91e-17	5.91e-17	5.82981	5.82978	5.82975	5.82973	5.82972
4.73	5.86e-17	5.87e-17	5.89e-17	5.9e-17	5.9e-17	5.82483	5.8248	5.82477	5.82475	5.82474
4.74	5.85e-17	5.86e-17	5.88e-17	5.88e-17	5.89e-17	5.81985	5.81982	5.81979	5.81977	5.81976
4.75	5.84e-17	5.85e-17	5.86e-17	5.87e-17	5.87e-17	5.81487	5.81484	5.81481	5.81479	5.81478
4.76	5.82e-17	5.83e-17	5.85e-17	5.86e-17	5.86e-17	5.80989	5.80986	5.80983	5.80981	5.8098
4.77	5.81e-17	5.82e-17	5.83e-17	5.84e-17	5.85e-17	5.80491	5.80488	5.80485	5.80483	5.80482
4.78	5.8e-17	5.81e-17	5.82e-17	5.83e-17	5.83e-17	5.79993	5.7999	5.79987	5.79985	5.79984
4.79	5.78e-17	5.79e-17	5.81e-17	5.82e-17	5.82e-17	5.79495	5.79493	5.79489	5.79487	5.79486
4.8	5.77e-17	5.78e-17	5.8e-17	5.8e-17	5.81e-17	5.78997	5.78995	5.78991	5.78989	5.78988
4.81	5.76e-17	5.77e-17	5.78e-17	5.79e-17	5.79e-17	5.78499	5.78497	5.78493	5.78491	5.78491
4.82	5.75e-17	5.76e-17	5.77e-17	5.78e-17	5.78e-17	5.78001	5.77999	5.77995	5.77993	5.77993
4.83	5.73e-17	5.75e-17	5.76e-17	5.77e-17	5.77e-17	5.77503	5.77501	5.77497	5.77496	5.77495
4.84	5.72e-17	5.73e-17	5.75e-17	5.75e-17	5.76e-17	5.77005	5.77003	5.76999	5.76998	5.76997
4.85	5.71e-17	5.72e-17	5.74e-17	5.74e-17	5.75e-17	5.76508	5.76505	5.76501	5.765	5.76499
4.86	5.7e-17	5.71e-17	5.72e-17	5.73e-17	5.73e-17	5.7601	5.76007	5.76003	5.76002	5.76001
4.87	5.69e-17	5.7e-17	5.71e-17	5.72e-17	5.72e-17	5.75512	5.75509	5.75506	5.75504	5.75503
4.88	5.68e-17	5.69e-17	5.7e-17	5.71e-17	5.71e-17	5.75014	5.75011	5.75008	5.75006	5.75005
4.89	5.67e-17	5.68e-17	5.69e-17	5.7e-17	5.7e-17	5.74516	5.74513	5.7451	5.74508	5.74507
4.9	5.65e-17	5.66e-17	5.68e-17	5.69e-17	5.69e-17	5.74018	5.74015	5.74012	5.7401	5.74009
4.91	5.64e-17	5.65e-17	5.67e-17	5.67e-17	5.68e-17	5.7352	5.73517	5.73514	5.73512	5.73511
4.92	5.63e-17	5.64e-17	5.66e-17	5.66e-17	5.67e-17	5.73022	5.73019	5.73016	5.73014	5.73013
4.93	5.62e-17	5.63e-17	5.65e-17	5.65e-17	5.66e-17	5.72524	5.72521	5.72518	5.72516	5.72515
4.94	5.61e-17	5.62e-17	5.64e-17	5.64e-17	5.65e-17	5.72026	5.72023	5.7202	5.72018	5.72017
4.95	5.6e-17	5.61e-17	5.62e-17	5.63e-17	5.64e-17	5.71528	5.71526	5.71522	5.7152	5.71519
4.96	5.59e-17	5.6e-17	5.61e-17	5.62e-17	5.62e-17	5.7103	5.71028	5.71024	5.71022	5.71021
4.97	5.58e-17	5.59e-17	5.6e-17	5.61e-17	5.61e-17	5.70532	5.7053	5.70526	5.70524	5.70524
4.98	5.57e-17	5.58e-17	5.59e-17	5.6e-17	5.6e-17	5.70034	5.70032	5.70028	5.70026	5.70026
4.99	5.56e-17	5.57e-17	5.58e-17	5.59e-17	5.59e-17	5.69536	5.69534	5.6953	5.69529	5.69528
5	5.55e-17	5.56e-17	5.57e-17	5.58e-17	5.59e-17	5.69038	5.69036	5.69032	5.69031	5.6903
5.01	5.54e-17	5.55e-17	5.57e-17	5.57e-17	5.58e-17	5.6854	5.68538	5.68534	5.68533	5.68532
5.02	5.53e-17	5.54e-17	5.56e-17	5.56e-17	5.57e-17	5.68043	5.6804	5.68036	5.68035	5.68034
5.03	5.52e-17	5.53e-17	5.55e-17	5.55e-17	5.56e-17	5.67545	5.67542	5.67539	5.67537	5.67536
5.04	5.51e-17	5.52e-17	5.54e-17	5.54e-17	5.55e-17	5.67047	5.67044	5.67041	5.67039	5.67038
5.05	5.5e-17	5.51e-17	5.53e-17	5.53e-17	5.54e-17	5.66549	5.66546	5.66543	5.66541	5.6654
5.06	5.5e-17	5.51e-17	5.52e-17	5.53e-17	5.53e-17	5.66051	5.66048	5.66045	5.66043	5.66042
5.07	5.49e-17	5.5e-17	5.51e-17	5.52e-17	5.52e-17	5.65553	5.6555	5.65547	5.65545	5.65544
5.08	5.48e-17	5.49e-17	5.5e-17	5.51e-17	5.51e-17	5.65055	5.65052	5.65049	5.65047	5.65046
5.09	5.47e-17	5.48e-17	5.49e-17	5.5e-17	5.5e-17	5.64557	5.64554	5.64551	5.64549	5.64548
5.1	5.46e-17	5.47e-17	5.48e-17	5.49e-17	5.49e-17	5.64059	5.64056	5.64053	5.64051	5.6405
5.11	5.45e-17	5.46e-17	5.48e-17	5.48e-17	5.49e-17	5.63561	5.63558	5.63555	5.63553	5.63552
5.12	5.44e-17	5.45e-17	5.47e-17	5.47e-17	5.48e-17	5.63063	5.63061	5.63057	5.63055	5.63054
5.13	5.44e-17	5.45e-17	5.46e-17	5.47e-17	5.47e-17	5.62565	5.62563	5.62559	5.62557	5.62556
5.14	5.43e-17	5.44e-17	5.45e-17	5.46e-17	5.46e-17	5.62067	5.62065	5.62061	5.62059	5.62059
5.15	5.42e-17	5.43e-17	5.44e-17	5.45e-17	5.45e-17	5.61569	5.61567	5.61563	5.61561	5.61561
5.16	5.41e-17	5.42e-17	5.44e-17	5.44e-17	5.45e-17	5.61071	5.61069	5.61065	5.61064	5.61063
5.17	5.4e-17	5.41e-17	5.43e-17	5.43e-17	5.44e-17	5.60573	5.60571	5.60567	5.60566	5.60565
5.18	5.4e-17	5.41e-17	5.42e-17	5.43e-17	5.43e-17	5.60076	5.60073	5.60069	5.60068	5.60067
5.19	5.39e-17	5.4e-17	5.41e-17	5.42e-17	5.42e-17	5.59578	5.59575	5.59571	5.5957	5.59569
5.2	5.38e-17	5.39e-17	5.41e-17	5.41e-17	5.41e-17	5.5908	5.59077	5.59074	5.59072	5.59071
5.21	5.37e-17	5.38e-17	5.4e-17	5.4e-17	5.41e-17	5.58582	5.58579	5.58576	5.58574	5.58573
5.22	5.37e-17	5.38e-17	5.39e-17	5.4e-17	5.4e-17	5.58084	5.58081	5.58078	5.58076	5.58075
5.23	5.36e-17	5.37e-17	5.38e-17	5.39e-17	5.39e-17	5.57586	5.57583	5.5758	5.57578	5.57577
5.24	5.35e-17	5.36e-17	5.38e-17	5.38e-17	5.39e-17	5.57088	5.57085	5.57082	5.5708	5.57079
5.25	5.35e-17	5.36e-17	5.37e-17	5.38e-17	5.38e-17	5.5659	5.56587	5.56584	5.56582	5.56581
5.26	5.34e-17	5.35e-17	5.36e-17	5.37e-17	5.37e-17	5.56092	5.56089	5.56086	5.56084	5.56083
5.27	5.33e-17	5.34e-17	5.36e-17	5.36e-17	5.36e-17	5.55594	5.55591	5.55588	5.55586	5.55585
5.28	5.33e-17	5.34e-17	5.35e-17	5.35e-17	5.36e-17	5.55096	5.55094	5.5509	5.55088	5.55087
5.29	5.32e-17	5.33e-17	5.34e-17	5.35e-17	5.35e-17	5.54598	5.54596	5.54592	5.5459	5.54589
5.3	5.31e-17	5.32e-17	5.34e-17	5.34e-17	5.34e-17	5.541	5.54098	5.54094	5.54092	5.54092
5.31	5.31e-17	5.32e-17	5.33e-17	5.34e-17	5.34e-17	5.53602	5.536	5.53596	5.53594	5.53594
5.32	5.3e-17	5.31e-17	5.32e-17	5.33e-17	5.33e-17	5.53104	5.53102	5.53098	5.53097	5.53096
5.33	5.29e-17	5.3e-17	5.32e-17	5.32e-17	5.33e-17	5.52606	5.52604	5.526	5.52599	5.52598
5.34	5.29e-17	5.3e-17	5.31e-17	5.32e-17	5.32e-17	5.52108	5.52106	5.52102	5.52101	5.521
5.35	5.28e-17	5.29e-17	5.3e-17	5.31e-17	5.31e-17	5.51611	5.51608	5.51604	5.51603	5.51602
5.36	5.27e-17	5.28e-17	5.3e-17	5.3e-17	5.31e-17	5.51113	5.5111	5.51107	5.51105	5.51104
5.37	5.27e-17	5.28e-17	5.29e-17	5.3e-17	5.3e-17	5.50615	5.50612	5.50609	5.50607	5.50606
5.38	5.26e-17	5.27e-17	5.29e-17	5.29e-17	5.29e-17	5.50117	5.50114	5.50111	5.50109	5.50108
5.39	5.26e-17	5.27e-17	5.28e-17	5.29e-17	5.29e-17	5.49619	5.49616	5.49613	5.49611	5.4961
5.4	5.25e-17	5.26e-17	5.27e-17	5.28e-17	5.28e-17	5.49121	5.49118	5.49115	5.49113	5.49112
5.41	5.25e-17	5.26e-17	5.27e-17	5.27e-17	5.28e-17	5.48623	5.4862	5.48617	5.48615	5.48614
5.42	5.24e-17	5.25e-17	5.26e-17	5.27e-17	5.27e-17	5.48125	5.48122	5.48119	5.48117	5.48116
5.43	5.23e-17	5.24e-17	5.26e-17	5.26e-17	5.27e-17	5.47627	5.47624	5.47621	5.47619	5.47618
5.44	5.23e-17	5.24e-17	5.25e-17	5.26e-17	5.26e-17	5.47129	5.47126	5.47123	5.47121	5.4712
5.45	5.22e-17	5.23e-17	5.25e-17	5.25e-17	5.26e-17	5.46631	5.46629	5.46625	5.46623	5.46622
5.46	5.22e-17	5.23e-17	5.24e-17	5.25e-17	5.25e-17	5.46133	5.46131	5.46127	5.46125	5.46124
5.47	5.21e-17	5.22e-17	5.23e-17	5.24e-17	5.24e-17	5.45635	5.45633	5.45629	5.45627	5.45627
5.48	5.21e-17	5.22e-17	5.23e-17	5.24e-17	5.24e-17	5.45137	5.45135	5.45131	5.45129	5.45129
5.49	5.2e-17	5.21e-17	5.22e-17	5.23e-17	5.23e-17	5.44639	5.44637	5.44633	5.44632	5.44631
5.5	5.2e-17	5.21e-17	5.22e-17	5.23e-17	5.23e-17	5.44141	5.44139	5.44135	5.44134	5.44133
5.51	5.19e-17	5.2e-17	5.21e-17	5.22e-17	5.22e-17	5.43644	5.43641	5.43637	5.43636	5.43635
5.52	5.19e-17	5.2e-17	5.21e-17	5.22e-17	5.22e-17	5.43146	5.43143	5.43139	5.43138	5.43137
5.53	5.18e-17	5.19e-17	5.2e-17	5.21e-17	5.21e-17	5.42648	5.42645	5.42642	5.4264	5.42639
5.54	5.18e-17	5.19e-17	5.2e-17	5.21e-17	5.21e-17	5.4215	5.42147	5.42144	5.42142	5.42141
5.55	5.17e-17	5.18e-17	5.19e-17	5.2e-17	5.2e-17	5.41652	5.41649	5.41646	5.41644	5.41643
5.56	5.17e-17	5.18e-17	5.19e-17	5.2e-17	5.2e-17	5.41154	5.41151	5.41148	5.41146	5.41145
5.57	5.16e-17	5.17e-17	5.19e-17	5.19e-17	5.19e-17	5.40656	5.40653	5.4065	5.40648	5.40647
5.58	5.16e-17	5.17e-17	5.18e-17	5.19e-17	5.19e-17	5.40158	5.40155	5.40152	5.4015	5.40149
5.59	5.15e-17	5.16e-17	5.18e-17	5.18e-17	5.19e-17	5.3966	5.39657	5.39654	5.39652	5.39651
5.6	5.15e-17	5.16e-17	5.17e-17	5.18e-17	5.18e-17	5.39162	5.39159	5.39156	5.39154	5.39153
5.61	5.15e-17	5.15e-17	5.17e-17	5.17e-17	5.18e-17	5.38664	5.38662	5.38658	5.38656	5.38655
5.62	5.14e-17	5.15e-17	5.16e-17	5.17e-17	5.17e-17	5.38166	5.38164	5.3816	5.38158	5.38157
5.63	5.14e-17	5.15e-17	5.16e-17	5.16e-17	5.17e-17	5.37668	5.37666	5.37662	5.3766	5.3766
5.64	5.13e-17	5.14e-17	5.15e-17	5.16e-17	5.16e-17	5.3717	5.37168	5.37164	5.37162	5.37162
5.65	5.13e-17	5.14e-17	5.15e-17	5.16e-17	5.16e-17	5.36672	5.3667	5.36666	5.36665	5.36664
5.66	5.12e-17	5.13e-17	5.15e-17	5.15e-17	5.15e-17	5.36174	5.36172	5.36168	5.36167	5.36166
5.67	5.12e-17	5.13e-17	5.14e-17	5.15e-17	5.15e-17	5.35676	5.35674	5.3567	5.35669	5.35668
5.68	5.12e-17	5.12e-17	5.14e-17	5.14e-17	5.15e-17	5.35179	5.35176	5.35172	5.35171	5.3517
5.69	5.11e-17	5.12e-17	5.13e-17	5.14e-17	5.14e-17	5.34681	5.34678	5.34675	5.34673	5.34672
5.7	5.11e-17	5.12e-17	5.13e-17	5.14e-17	5.14e-17	5.34183	5.3418	5.34177	5.34175	5.34174
5.71	5.1e-17	5.11e-17	5.13e-17	5.13e-17	5.13e-17	5.33685	5.33682	5.33679	5.33677	5.33676
5.72	5.1e-17	5.11e-17	5.12e-17	5.13e-17	5.13e-17	5.33187	5.33184	5.33181	5.33179	5.33178
5.73	5.1e-17	5.11e-17	5.12e-17	5.12e-17	5.13e-17	5.32689	5.32686	5.32683	5.32681	5.3268
5.74	5.09e-17	5.1e-17	5.11e-17	5.12e-17	5.12e-17	5.32191	5.32188	5.32185	5.32183	5.32182
5.75	5.09e-17	5.1e-17	5.11e-17	5.12e-17	5.12e-17	5.31693	5.3169	5.31687	5.31685	5.31684
5.76	5.08e-17	5.09e-17	5.11e-17	5.11e-17	5.12e-17	5.31195	5.31192	5.31189	5.31187	5.31186
5.77	5.08e-17	5.09e-17	5.1e-17	5.11e-17	5.11e-17	5.30697	5.30694	5.30691	5.30689	5.30688
5.78	5.08e-17	5.09e-17	5.1e-17	5.11e-17	5.11e-17	5.30199	5.30197	5.30193	5.30191	5.3019
5.79	5.07e-17	5.08e-17	5.1e-17	5.1e-17	5.1e-17	5.29701	5.29699	5.29695	5.29693	5.29692
5.8	5.07e-17	5.08e-17	5.09e-17	5.1e-17	5.1e-17	5.29203	5.29201	5.29197	5.29195	5.29195
5.81	5.07e-17	5.08e-17	5.09e-17	5.09e-17	5.1e-17	5.28705	5.28703	5.28699	5.28697	5.28697
5.82	5.06e-17	5.07e-17	5.08e-17	5.09e-17	5.09e-17	5.28207	5.28205	5.28201	5.282	5.28199
5.83	5.06e-17	5.07e-17	5.08e-17	5.09e-17	5.09e-17	5.27709	5.27707	5.27703	5.27702	5.27701
5.84	5.06e-17	5.07e-17	5.08e-17	5.08e-17	5.09e-17	5.27212	5.27209	5.27205	5.27204	5.27203
5.85	5.05e-17	5.06e-17	5.07e-17	5.08e-17	5.08e-17	5.26714	5.26711	5.26707	5.26706	5.26705
5.86	5.05e-17	5.06e-17	5.07e-17	5.08e-17	5.08e-17	5.26216	5.26213	5.2621	5.26208	5.26207
5.87	5.05e-17	5.06e-17	5.07e-17	5.07e-17	5.08e-17	5.25718	5.25715	5.25712	5.2571	5.25709
5.88	5.04e-17	5.05e-17	5.06e-17	5.07e-17	5.07e-17	5.2522	5.25217	5.25214	5.25212	5.25211
5.89	5.04e-17	5.05e-17	5.06e-17	5.07e-17	5.07e-17	5.24722	5.24719	5.24716	5.24714	5.24713
5.9	5.04e-17	5.05e-17	5.06e-17	5.06e-17	5.07e-17	5.24224	5.24221	5.24218	5.24216	5.24215
5.91	5.03e-17	5.04e-17	5.06e-17	5.06e-17	5.06e-17	5.23726	5.23723	5.2372	5.23718	5.23717
5.92	5.03e-17	5.04e-17	5.05e-17	5.06e-17	5.06e-17	5.23228	5.23225	5.23222	5.2322	5.23219
5.93	5.03e-17	5.04e-17	5.05e-17	5.06e-17	5.06e-17	5.2273	5.22727	5.22724	5.22722	5.22721
5.94	5.02e-17	5.03e-17	5.05e-17	5.05e-17	5.06e-17	5.22232	5.2223	5.22226	5.22224	5.22223
5.95	5.02e-17	5.03e-17	5.04e-17	5.05e-17	5.05e-17	5.21734	5.21732	5.21728	5.21726	5.21725
5.96	5.02e-17	5.03e-17	5.04e-17	5.05e-17	5.05e-17	5.21236	5.21234	5.2123	5.21228	5.21228
5.97	5.02e-17	5.03e-17	5.04e-17	5.04e-17	5.05e-17	5.20738	5.20736	5.20732	5.2073	5.2073
5.98	5.01e-17	5.02e-17	5.03e-17	5.04e-17	5.04e-17	5.2024	5.20238	5.20234	5.20233	5.20232
5.99	5.01e-17	5.02e-17	5.03e-17	5.04e-17	5.04e-17	5.19742	5.1974	5.19736	5.19735	5.19734
6	5.01e-17	5.02e-17	5.03e-17	5.04e-17	5.04e-17	5.19244	5.19242	5.19238	5.19237	5.19236
6.01	5.01e-17	5.01e-17	5.03e-17	5.03e-17	5.04e-17	5.18747	5.18744	5.1874	5.18739	5.18738
6.02	5e-17	5.01e-17	5.02e-17	5.03e-17	5.03e-17	5.18249	5.18246	5.18243	5.18241	5.1824
6.03	5e-17	5.01e-17	5.02e-17	5.03e-17	5.03e-17	5.17751	5.17748	5.17745	5.17743	5.17742
6.04	5e-17	5.01e-17	5.02e-17	5.02e-17	5.03e-17	5.17253	5.1725	5.17247	5.17245	5.17244
6.05	4.99e-17	5e-17	5.02e-17	5.02e-17	5.02e-17	5.16755	5.16752	5.16749	5.16747	5.16746
6.06	4.99e-17	5e-17	5.01e-17	5.02e-17	5.02e-17	5.16257	5.16254	5.16251	5.16249	5.16248
6.07	4.99e-17	5e-17	5.01e-17	5.02e-17	5.02e-17	5.15759	5.15756	5.15753	5.15751	5.1575
6.08	4.99e-17	5e-17	5.01e-17	5.01e-17	5.02e-17	5.15261	5.15258	5.15255	5.15253	5.15252
6.09	4.98e-17	4.99e-17	5.01e-17	5.01e-17	5.01e-17	5.14763	5.1476	5.14757	5.14755	5.14754
6.1	4.98e-17	4.99e-17	5e-17	5.01e-17	5.01e-17	5.14265	5.14262	5.14259	5.14257	5.14256
6.11	4.98e-17	4.99e-17	5e-17	5.01e-17	5.01e-17	5.13767	5.13765	5.13761	5.13759	5.13758
6.12	4.98e-17	4.99e-17	5e-17	5e-17	5.01e-17	5.13269	5.13267	5.13263	5.13261	5.1326
6.13	4.97e-17	4.98e-17	5e-17	5e-17	5e-17	5.12771	5.12769	5.12765	5.12763	5.12763
6.14	4.97e-17	4.98e-17	4.99e-17	5e-17	5e-17	5.12273	5.12271	5.12267	5.12265	5.12265
6.15	4.97e-17	4.98e-17	4.99e-17	5e-17	5e-17	5.11775	5.11773	5.11769	5.11768	5.11767
6.16	4.97e-17	4.98e-17	4.99e-17	4.99e-17	5e-17	5.11277	5.11275	5.11271	5.1127	5.11269
6.17	4.97e-17	4.97e-17	4.99e-17	4.99e-17	5e-17	5.1078	5.10777	5.10773	5.10772	5.10771
6.18	4.96e-17	4.97e-17	4.98e-17	4.99e-17	4.99e-17	5.10282	5.10279	5.10275	5.10274	5.10273
6.19	4.96e-17	4.97e-17	4.98e-17	4.99e-17	4.99e-17	5.09784	5.09781	5.09778	5.09776	5.09775
6.2	4.96e-17	4.97e-17	4.98e-17	4.99e-17	4.99e-17	5.09286	5.09283	5.0928	5.09278	5.09277
6.21	4.96e-17	4.97e-17	4.98e-17	4.98e-17	4.99e-17	5.08788	5.08785	5.08782	5.0878	5.08779
6.22	4.95e-17	4.96e-17	4.98e-17	4.98e-17	4.98e-17	5.0829	5.08287	5.08284	5.08282	5.08281
6.23	4.95e-17	4.96e-17	4.97e-17	4.98e-17	4.98e-17	5.07792	5.07789	5.07786	5.07784	5.07783
6.24	4.95e-17	4.96e-17	4.97e-17	4.98e-17	4.98e-17	5.07294	5.07291	5.07288	5.07286	5.07285
6.25	4.95e-17	4.96e-17	4.97e-17	4.98e-17	4.98e-17	5.06796	5.06793	5.0679	5.06788	5.06787
6.26	4.95e-17	4.96e-17	4.97e-17	4.97e-17	4.98e-17	5.06298	5.06295	5.06292	5.0629	5.06289
6.27	4.94e-17	4.95e-17	4.97e-17	4.97e-17	4.97e-17	5.058	5.05798	5.05794	5.05792	5.05791
6.28	4.94e-17	4.95e-17	4.96e-17	4.97e-17	4.97e-17	5.05302	5.053	5.05296	5.05294	5.05293
6.29	4.94e-17	4.95e-17	4.96e-17	4.97e-17	4.97e-17	5.04804	5.04802	5.04798	5.04796	5.04796
6.3	4.94e-17	4.95e-17	4.96e-17	4.97e-17	4.97e-17	5.04306	5.04304	5.043	5.04298	5.04298
6.31	4.94e-17	4.95e-17	4.96e-17	4.96e-17	4.97e-17	5.03808	5.03806	5.03802	5.03801	5.038
6.32	4.93e-17	4.94e-17	4.96e-17	4.96e-17	4.96e-17	5.0331	5.03308	5.03304	5.03303	5.03302
6.33	4.93e-17	4.94e-17	4.95e-17	4.96e-17	4.96e-17	5.02812	5.0281	5.02806	5.02805	5.02804
6.34	4.93e-17	4.94e-17	4.95e-17	4.96e-17	4.96e-17	5.02315	5.02312	5.02308	5.02307	5.02306
6.35	4.93e-17	4.94e-17	4.95e-17	4.96e-17	4.96e-17	5.01817	5.01814	5.01811	5.01809	5.01808
6.36	4.93e-17	4.94e-17	4.95e-17	4.95e-17	4.96e-17	5.01319	5.01316	5.01313	5.01311	5.0131
6.37	4.93e-17	4.93e-17	4.95e-17	4.95e-17	4.96e-17	5.00821	5.00818	5.00815	5.00813	5.00812
6.38	4.92e-17	4.93e-17	4.94e-17	4.95e-17	4.95e-17	5.00323	5.0032	5.00317	5.00315	5.00314
6.39	4.92e-17	4.93e-17	4.94e-17	4.95e-17	4.95e-17	4.99825	4.99822	4.99819	4.99817	4.99816
6.4	4.92e-17	4.93e-17	4.94e-17	4.95e-17	4.95e-17	4.99327	4.99324	4.99321	4.99319	4.99318
6.41	4.92e-17	4.93e-17	4.94e-17	4.95e-17	4.95e-17	4.98829	4.98826	4.98823	4.98821	4.9882
6.42	4.92e-17	4.93e-17	4.94e-17	4.94e-17	4.95e-17	4.98331	4.98328	4.98325	4.98323	4.98322
6.43	4.92e-17	4.92e-17	4.94e-17	4.94e-17	4.95e-17	4.97833	4.9783	4.97827	4.97825	4.97824
6.44	4.91e-17	4.92e-17	4.93e-17	4.94e-17	4.94e-17	4.97335	4.97333	4.97329	4.97327	4.97326
6.45	4.91e-17	4.92e-17	4.93e-17	4.94e-17	4.94e-17	4.96837	4.96835	4.96831	4.96829	4.96828
6.46	4.91e-17	4.92e-17	4.93e-17	4.94e-17	4.94e-17	4.96339	4.96337	4.96333	4.96331	4.96331
6.47	4.91e-17	4.92e-17	4.93e-17	4.94e-17	4.94e-17	4.95841	4.95839	4.95835	4.95833	4.95833
6.48	4.91e-17	4.92e-17	4.93e-17	4.93e-17	4.94e-17	4.95343	4.95341	4.95337	4.95336	4.95335
6.49	4.91e-17	4.91e-17	4.93e-17	4.93e-17	4.94e-17	4.94845	4.94843	4.94839	4.94838	4.94837
6.5	4.9e-17	4.91e-17	4.93e-17	4.93e-17	4.93e-17	4.94348	4.94345	4.94341	4.9434	4.94339
6.51	4.9e-17	4.91e-17	4.92e-17	4.93e-17	4.93e-17	4.9385	4.93847	4.93843	4.93842	4.93841
6.52	4.9e-17	4.91e-17	4.92e-17	4.93e-17	4.93e-17	4.93352	4.93349	4.93346	4.93344	4.93343
6.53	4.9e-17	4.91e-17	4.92e-17	4.93e-17	4.93e-17	4.92854	4.92851	4.92848	4.92846	4.92845
6.54	4.9e-17	4.91e-17	4.92e-17	4.93e-17	4.93e-17	4.92356	4.92353	4.9235	4.92348	4.92347
6.55	4.9e-17	4.91e-17	4.92e-17	4.92e-17	4.93e-17	4.91858	4.91855	4.91852	4.9185	4.91849
6.56	4.9e-17	4.9e-17	4.92e-17	4.92e-17	4.93e-17	4.9136	4.91357	4.91354	4.91352	4.91351
6.57	4.89e-17	4.9e-17	4.91e-17	4.92e-17	4.92e-17	4.90862	4.90859	4.90856	4.90854	4.90853
6.58	4.89e-17	4.9e-17	4.91e-17	4.92e-17	4.92e-17	4.90364	4.90361	4.90358	4.90356	4.90355
6.59	4.89e-17	4.9e-17	4.91e-17	4.92e-17	4.92e-17	4.89866	4.89863	4.8986	4.89858	4.89857
6.6	4.89e-17	4.9e-17	4.91e-17	4.92e-17	4.92e-17	4.89368	4.89366	4.89362	4.8936	4.89359
6.61	4.89e-17	4.9e-17	4.91e-17	4.92e-17	4.92e-17	4.8887	4.88868	4.88864	4.88862	4.88861
6.62	4.89e-17	4.9e-17	4.91e-17	4.91e-17	4.92e-17	4.88372	4.8837	4.88366	4.88364	4.88364
6.63	4.89e-17	4.89e-17	4.91e-17	4.91e-17	4.92e-17	4.87874	4.87872	4.87868	4.87866	4.87866
6.64	4.88e-17	4.89e-17	4.91e-17	4.91e-17	4.91e-17	4.87376	4.87374	4.8737	4.87369	4.87368
6.65	4.88e-17	4.89e-17	4.9e-17	4.91e-17	4.91e-17	4.86878	4.86876	4.86872	4.86871	4.8687
6.66	4.88e-17	4.89e-17	4.9e-17	4.91e-17	4.91e-17	4.8638	4.86378	4.86374	4.86373	4.86372
6.67	4.88e-17	4.89e-17	4.9e-17	4.91e-17	4.91e-17	4.85883	4.8588	4.85876	4.85875	4.85874
6.68	4.88e-17	4.89e-17	4.9e-17	4.91e-17	4.91e-17	4.85385	4.85382	4.85379	4.85377	4.85376
6.69	4.88e-17	4.89e-17	4.9e-17	4.9e-17	4.91e-17	4.84887	4.84884	4.84881	4.84879	4.84878
6.7	4.88e-17	4.89e-17	4.9e-17	4.9e-17	4.91e-17	4.84389	4.84386	4.84383	4.84381	4.8438
6.71	4.88e-17	4.88e-17	4.9e-17	4.9e-17	4.91e-17	4.83891	4.83888	4.83885	4.83883	4.83882
6.72	4.87e-17	4.88e-17	4.9e-17	4.9e-17	4.9e-17	4.83393	4.8339	4.83387	4.83385	4.83384
6.73	4.87e-17	4.88e-17	4.89e-17	4.9e-17	4.9e-17	4.82895	4.82892	4.82889	4.82887	4.82886
6.74	4.87e-17	4.88e-17	4.89e-17	4.9e-17	4.9e-17	4.82397	4.82394	4.82391	4.82389	4.82388
6.75	4.87e-17	4.88e-17	4.89e-17	4.9e-17	4.9e-17	4.81899	4.81896	4.81893	4.81891	4.8189
6.76	4.87e-17	4.88e-17	4.89e-17	4.9e-17	4.9e-17	4.81401	4.81398	4.81395	4.81393	4.81392
6.77	4.87e-17	4.88e-17	4.89e-17	4.9e-17	4.9e-17	4.80903	4.80901	4.80897	4.80895	4.80894
6.78	4.87e-17	4.88e-17	4.89e-17	4.89e-17	4.9e-17	4.80405	4.80403	4.80399	4.80397	4.80396
6.79	4.87e-17	4.88e-17	4.89e-17	4.89e-17	4.9e-17	4.79907	4.79905	4.79901	4.79899	4.79899
6.8	4.87e-17	4.87e-17	4.89e-17	4.89e-17	4.9e-17	4.79409	4.79407	4.79403	4.79401	4.79401
6.81	4.86e-17	4.87e-17	4.89e-17	4.89e-17	4.89e-17	4.78911	4.78909	4.78905	4.78904	4.78903
6.82	4.86e-17	4.87e-17	4.88e-17	4.89e-17	4.89e-17	4.78413	4.78411	4.78407	4.78406	4.78405
6.83	4.86e-17	4.87e-17	4.88e-17	4.89e-17	4.89e-17	4.77916	4.77913	4.77909	4.77908	4.77907
6.84	4.86e-17	4.87e-17	4.88e-17	4.89e-17	4.89e-17	4.77418	4.77415	4.77411	4.7741	4.77409
6.85	4.86e-17	4.87e-17	4.88e-17	4.89e-17	4.89e-17	4.7692	4.76917	4.76914	4.76912	4.76911
6.86	4.86e-17	4.87e-17	4.88e-17	4.89e-17	4.89e-17	4.76422	4.76419	4.76416	4.76414	4.76413
6.87	4.86e-17	4.87e-17	4.88e-17	4.89e-17	4.89e-17	4.75924	4.75921	4.75918	4.75916	4.75915
6.88	4.86e-17	4.87e-17	4.88e-17	4.88e-17	4.89e-17	4.75426	4.75423	4.7542	4.75418	4.75417
6.89	4.86e-17	4.87e-17	4.88e-17	4.88e-17	4.89e-17	4.74928	4.74925	4.74922	4.7492	4.74919
6.9	4.86e-17	4.86e-17	4.88e-17	4.88e-17	4.89e-17	4.7443	4.74427	4.74424	4.74422	4.74421
6.91	4.85e-17	4.86e-17	4.88e-17	4.88e-17	4.88e-17	4.73932	4.73929	4.73926	4.73924	4.73923
6.92	4.85e-17	4.86e-17	4.87e-17	4.88e-17	4.88e-17	4.73434	4.73431	4.73428	4.73426	4.73425
6.93	4.85e-17	4.86e-17	4.87e-17	4.88e-17	4.88e-17	4.72936	4.72934	4.7293	4.72928	4.72927
6.94	4.85e-17	4.86e-17	4.87e-17	4.88e-17	4.88e-17	4.72438	4.72436	4.72432	4.7243	4.72429
6.95	4.85e-17	4.86e-17	4.87e-17	4.88e-17	4.88e-17	4.7194	4.71938	4.71934	4.71932	4.71932
6.96	4.85e-17	4.86e-17	4.87e-17	4.88e-17	4.88e-17	4.71442	4.7144	4.71436	4.71434	4.71434
6.97	4.85e-17	4.86e-17	4.87e-17	4.88e-17	4.88e-17	4.70944	4.70942	4.70938	4.70937	4.70936
6.98	4.85e-17	4.86e-17	4.87e-17	4.87e-17	4.88e-17	4.70446	4.70444	4.7044	4.70439	4.70438
6.99	4.85e-17	4.86e-17	4.87e-17	4.87e-17	4.88e-17	4.69948	4.69946	4.69942	4.69941	4.6994
7	4.85e-17	4.86e-17	4.87e-17	4.87e-17	4.88e-17	4.69451	4.69448	4.69444	4.69443	4.69442
7.01	4.85e-17	4.85e-17	4.87e-17	4.87e-17	4.88e-17	4.68953	4.6895	4.68947	4.68945	4.68944
7.02	4.84e-17	4.85e-17	4.87e-17	4.87e-17	4.87e-17	4.68455	4.68452	4.68449	4.68447	4.68446
7.03	4.84e-17	4.85e-17	4.86e-17	4.87e-17	4.87e-17	4.67957	4.67954	4.67951	4.67949	4.67948
7.04	4.84e-17	4.85e-17	4.86e-17	4.87e-17	4.87e-17	4.67459	4.67456	4.67453	4.67451	4.6745
7.05	4.84e-17	4.85e-17	4.86e-17	4.87e-17	4.87e-17	4.66961	4.66958	4.66955	4.66953	4.66952
7.06	4.84e-17	4.85e-17	4.86e-17	4.87e-17	4.87e-17	4.66463	4.6646	4.66457	4.66455	4.66454
7.07	4.84e-17	4.85e-17	4.86e-17	4.87e-17	4.87e-17	4.65965	4.65962	4.65959	4.65957	4.65956
7.08	4.84e-17	4.85e-17	4.86e-17	4.87e-17	4.87e-17	4.65467	4.65464	4.65461	4.65459	4.65458
7.09	4.84e-17	4.85e-17	4.86e-17	4.87e-17	4.87e-17	4.64969	4.64966	4.64963	4.64961	4.6496
7.1	4.84e-17	4.85e-17	4.86e-17	4.87e-17	4.87e-17	4.64471	4.64469	4.64465	4.64463	4.64462
7.11	4.84e-17	4.85e-17	4.86e-17	4.86e-17	4.87e-17	4.63973	4.63971	4.63967	4.63965	4.63964
7.12	4.84e-17	4.85e-17	4.86e-17	4.86e-17	4.87e-17	4.63475	4.63473	4.63469	4.63467	4.63467
7.13	4.84e-17	4.85e-17	4.86e-17	4.86e-17	4.87e-17	4.62977	4.62975	4.62971	4.62969	4.62969
7.14	4.84e-17	4.84e-17	4.86e-17	4.86e-17	4.87e-17	4.62479	4.62477	4.62473	4.62472	4.62471
7.15	4.83e-17	4.84e-17	4.86e-17	4.86e-17	4.86e-17	4.61981	4.61979	4.61975	4.61974	4.61973
7.16	4.83e-17	4.84e-17	4.85e-17	4.86e-17	4.86e-17	4.61484	4.61481	4.61477	4.61476	4.61475
7.17	4.83e-17	4.84e-17	4.85e-17	4.86e-17	4.86e-17	4.60986	4.60983	4.60979	4.60978	4.60977
7.18	4.83e-17	4.84e-17	4.85e-17	4.86e-17	4.86e-17	4.60488	4.60485	4.60482	4.6048	4.60479
7.19	4.83e-17	4.84e-17	4.85e-17	4.86e-17	4.86e-17	4.5999	4.59987	4.59984	4.59982	4.59981
7.2	4.83e-17	4.84e-17	4.85e-17	4.86e-17	4.86e-17	4.59492	4.59489	4.59486	4.59484	4.59483
7.21	4.83e-17	4.84e-17	4.85e-17	4.86e-17	4.86e-17	4.58994	4.58991	4.58988	4.58986	4.58985
7.22	4.83e-17	4.84e-17	4.85e-17	4.86e-17	4.86e-17	4.58496	4.58493	4.5849	4.58488	4.58487
7.23	4.83e-17	4.84e-17	4.85e-17	4.86e-17	4.86e-17	4.57998	4.57995	4.57992	4.5799	4.57989
7.24	4.83e-17	4.84e-17	4.85e-17	4.86e-17	4.86e-17	4.575	4.57497	4.57494	4.57492	4.57491
7.25	4.83e-17	4.84e-17	4.85e-17	4.85e-17	4.86e-17	4.57002	4.56999	4.56996	4.56994	4.56993
7.26	4.83e-17	4.84e-17	4.85e-17	4.85e-17	4.86e-17	4.56504	4.56502	4.56498	4.56496	4.56495
7.27	4.83e-17	4.84e-17	4.85e-17	4.85e-17	4.86e-17	4.56006	4.56004	4.56	4.55998	4.55997
7.28	4.83e-17	4.84e-17	4.85e-17	4.85e-17	4.86e-17	4.55508	4.55506	4.55502	4.555	4.555
7.29	4.83e-17	4.83e-17	4.85e-17	4.85e-17	4.86e-17	4.5501	4.55008	4.55004	4.55002	4.55002
7.3	4.83e-17	4.83e-17	4.85e-17	4.85e-17	4.85e-17	4.54512	4.5451	4.54506	4.54505	4.54504
7.31	4.82e-17	4.83e-17	4.85e-17	4.85e-17	4.85e-17	4.54014	4.54012	4.54008	4.54007	4.54006
7.32	4.82e-17	4.83e-17	4.84e-17	4.85e-17	4.85e-17	4.53516	4.53514	4.5351	4.53509	4.53508
7.33	4.82e-17	4.83e-17	4.84e-17	4.85e-17	4.85e-17	4.53019	4.53016	4.53012	4.53011	4.5301
7.34	4.82e-17	4.83e-17	4.84e-17	4.85e-17	4.85e-17	4.52521	4.52518	4.52515	4.52513	4.52512
7.35	4.82e-17	4.83e-17	4.84e-17	4.85e-17	4.85e-17	4.52023	4.5202	4.52017	4.52015	4.52014
7.36	4.82e-17	4.83e-17	4.84e-17	4.85e-17	4.85e-17	4.51525	4.51522	4.51519	4.51517	4.51516
7.37	4.82e-17	4.83e-17	4.84e-17	4.85e-17	4.85e-17	4.51027	4.51024	4.51021	4.51019	4.51018
7.38	4.82e-17	4.83e-17	4.84e-17	4.85e-17	4.85e-17	4.50529	4.50526	4.50523	4.50521	4.5052
7.39	4.82e-17	4.83e-17	4.84e-17	4.85e-17	4.85e-17	4.50031	4.50028	4.50025	4.50023	4.50022
7.4	4.82e-17	4.83e-17	4.84e-17	4.85e-17	4.85e-17	4.49533	4.4953	4.49527	4.49525	4.49524
7.41	4.82e-17	4.83e-17	4.84e-17	4.85e-17	4.85e-17	4.49035	4.49032	4.49029	4.49027	4.49026
7.42	4.82e-17	4.83e-17	4.84e-17	4.84e-17	4.85e-17	4.48537	4.48534	4.48531	4.48529	4.48528
7.43	4.82e-17	4.83e-17	4.84e-17	4.84e-17	4.85e-17	4.48039	4.48037	4.48033	4.48031	4.4803
7.44	4.82e-17	4.83e-17	4.84e-17	4.84e-17	4.85e-17	4.47541	4.47539	4.47535	4.47533	4.47532
7.45	4.82e-17	4.83e-17	4.84e-17	4.84e-17	4.85e-17	4.47043	4.47041	4.47037	4.47035	4.47035
7.46	4.82e-17	4.83e-17	4.84e-17	4.84e-17	4.85e-17	4.46545	4.46543	4.46539	4.46537	4.46537
7.47	4.82e-17	4.82e-17	4.84e-17	4.84e-17	4.85e-17	4.46047	4.46045	4.46041	4.4604	4.46039
7.48	4.82e-17	4.82e-17	4.84e-17	4.84e-17	4.84e-17	4.45549	4.45547	4.45543	4.45542	4.45541
7.49	4.81e-17	4.82e-17	4.84e-17	4.84e-17	4.84e-17	4.45052	4.45049	4.45045	4.45044	4.45043
7.5	4.81e-17	4.82e-17	4.84e-17	4.84e-17	4.84e-17	4.44554	4.44551	4.44547	4.44546	4.44545
7.51	4.81e-17	4.82e-17	4.83e-17	4.84e-17	4.84e-17	4.44056	4.44053	4.4405	4.44048	4.44047
7.52	4.81e-17	4.82e-17	4.83e-17	4.84e-17	4.84e-17	4.43558	4.43555	4.43552	4.4355	4.43549
7.53	4.81e-17	4.82e-17	4.83e-17	4.84e-17	4.84e-17	4.4306	4.43057	4.43054	4.43052	4.43051
7.54	4.81e-17	4.82e-17	4.83e-17	4.84e-17	4.84e-17	4.42562	4.42559	4.42556	4.42554	4.42553
7.55	4.81e-17	4.82e-17	4.83e-17	4.84e-17	4.84e-17	4.42064	4.42061	4.42058	4.42056	4.42055
7.56	4.81e-17	4.82e-17	4.83e-17	4.84e-17	4.84e-17	4.41566	4.41563	4.4156	4.41558	4.41557
7.57	4.81e-17	4.82e-17	4.83e-17	4.84e-17	4.84e-17	4.41068	4.41065	4.41062	4.4106	4.41059
7.58	4.81e-17	4.82e-17	4.83e-17	4.84e-17	4.84e-17	4.4057	4.40567	4.40564	4.40562	4.40561
7.59	4.81e-17	4.82e-17	4.83e-17	4.84e-17	4.84e-17	4.40072	4.4007	4.40066	4.40064	4.40063
7.6	4.81e-17	4.82e-17	4.83e-17	4.84e-17	4.84e-17	4.39574	4.39572	4.39568	4.39566	4.39565
7.61	4.81e-17	4.82e-17	4.83e-17	4.84e-17	4.84e-17	4.39076	4.39074	4.3907	4.39068	4.39068
7.62	4.81e-17	4.82e-17	4.83e-17	4.84e-17	4.84e-17	4.38578	4.38576	4.38572	4.3857	4.3857
7.63	4.81e-17	4.82e-17	4.83e-17	4.84e-17	4.84e-17	4.3808	4.38078	4.38074	4.38073	4.38072
7.64	4.81e-17	4.82e-17	4.83e-17	4.83e-17	4.84e-17	4.37582	4.3758	4.37576	4.37575	4.37574
7.65	4.81e-17	4.82e-17	4.83e-17	4.83e-17	4.84e-17	4.37084	4.37082	4.37078	4.37077	4.37076
7.66	4.81e-17	4.82e-17	4.83e-17	4.83e-17	4.84e-17	4.36587	4.36584	4.3658	4.36579	4.36578
7.67	4.81e-17	4.82e-17	4.83e-17	4.83e-17	4.84e-17	4.36089	4.36086	4.36083	4.36081	4.3608
7.68	4.81e-17	4.82e-17	4.83e-17	4.83e-17	4.84e-17	4.35591	4.35588	4.35585	4.35583	4.35582
7.69	4.81e-17	4.82e-17	4.83e-17	4.83e-17	4.84e-17	4.35093	4.3509	4.35087	4.35085	4.35084
7.7	4.81e-17	4.81e-17	4.83e-17	4.83e-17	4.84e-17	4.34595	4.34592	4.34589	4.34587	4.34586
7.71	4.81e-17	4.81e-17	4.83e-17	4.83e-17	4.83e-17	4.34097	4.34094	4.34091	4.34089	4.34088
7.72	4.81e-17	4.81e-17	4.83e-17	4.83e-17	4.83e-17	4.33599	4.33596	4.33593	4.33591	4.3359
7.73	4.8e-17	4.81e-17	4.83e-17	4.83e-17	4.83e-17	4.33101	4.33098	4.33095	4.33093	4.33092
7.74	4.8e-17	4.81e-17	4.83e-17	4.83e-17	4.83e-17	4.32603	4.326	4.32597	4.32595	4.32594
7.75	4.8e-17	4.81e-17	4.82e-17	4.83e-17	4.83e-17	4.32105	4.32102	4.32099	4.32097	4.32096
7.76	4.8e-17	4.81e-17	4.82e-17	4.83e-17	4.83e-17	4.31607	4.31605	4.31601	4.31599	4.31598
7.77	4.8e-17	4.81e-17	4.82e-17	4.83e-17	4.83e-17	4.31109	4.31107	4.31103	4.31101	4.311
7.78	4.8e-17	4.81e-17	4.82e-17	4.83e-17	4.83e-17	4.30611	4.30609	4.30605	4.30603	4.30603
7.79	4.8e-17	4.81e-17	4.82e-17	4.83e-17	4.83e-17	4.30113	4.30111	4.30107	4.30105	4.30105
7.8	4.8e-17	4.81e-17	4.82e-17	4.83e-17	4.83e-17	4.29615	4.29613	4.29609	4.29608	4.29607
7.81	4.8e-17	4.81e-17	4.82e-17	4.83e-17	4.83e-17	4.29117	4.29115	4.29111	4.2911	4.29109
7.82	4.8e-17	4.81e-17	4.82e-17	4.83e-17	4.83e-17	4.2862	4.28617	4.28613	4.28612	4.28611
7.83	4.8e-17	4.81e-17	4.82e-17	4.83e-17	4.83e-17	4.28122	4.28119	4.28115	4.28114	4.28113
7.84	4.8e-17	4.81e-17	4.82e-17	4.83e-17	4.83e-17	4.27624	4.27621	4.27618	4.27616	4.27615
7.85	4.8e-17	4.81e-17	4.82e-17	4.83e-17	4.83e-17	4.27126	4.27123	4.2712	4.27118	4.27117
7.86	4.8e-17	4.81e-17	4.82e-17	4.83e-17	4.83e-17	4.26628	4.26625	4.26622	4.2662	4.26619
7.87	4.8e-17	4.81e-17	4.82e-17	4.83e-17	4.83e-17	4.2613	4.26127	4.26124	4.26122	4.26121
7.88	4.8e-17	4.81e-17	4.82e-17	4.83e-17	4.83e-17	4.25632	4.25629	4.25626	4.25624	4.25623
7.89	4.8e-17	4.81e-17	4.82e-17	4.83e-17	4.83e-17	4.25134	4.25131	4.25128	4.25126	4.25125
7.9	4.8e-17	4.81e-17	4.82e-17	4.83e-17	4.83e-17	4.24636	4.24633	4.2463	4.24628	4.24627
7.91	4.8e-17	4.81e-17	4.82e-17	4.83e-17	4.83e-17	4.24138	4.24135	4.24132	4.2413	4.24129
7.92	4.8e-17	4.81e-17	4.82e-17	4.83e-17	4.83e-17	4.2364	4.23638	4.23634	4.23632	4.23631
7.93	4.8e-17	4.81e-17	4.82e-17	4.82e-17	4.83e-17	4.23142	4.2314	4.23136	4.23134	4.23133
7.94	4.8e-17	4.81e-17	4.82e-17	4.82e-17	4.83e-17	4.22644	4.22642	4.22638	4.22636	4.22636
7.95	4.8e-17	4.81e-17	4.82e-17	4.82e-17	4.83e-17	4.22146	4.22144	4.2214	4.22138	4.22138
7.96	4.8e-17	4.81e-17	4.82e-17	4.82e-17	4.83e-17	4.21648	4.21646	4.21642	4.21641	4.2164
7.97	4.8e-17	4.81e-17	4.82e-17	4.82e-17	4.83e-17	4.2115	4.21148	4.21144	4.21143	4.21142
7.98	4.8e-17	4.81e-17	4.82e-17	4.82e-17	4.83e-17	4.20652	4.2065	4.20646	4.20645	4.20644
7.99	4.8e-17	4.81e-17	4.82e-17	4.82e-17	4.83e-17	4.20155	4.20152	4.20148	4.20147	4.20146
8	4.8e-17	4.81e-17	4.82e-17	4.82e-17	4.83e-17	4.19657	4.19654	4.19651	4.19649	4.19648
8.01	4.8e-17	4.8e-17	4.82e-17	4.82e-17	4.83e-17	4.19159	4.19156	4.19153	4.19151	4.1915
8.02	4.8e-17	4.8e-17	4.82e-17	4.82e-17	4.83e-17	4.18661	4.18658	4.18655	4.18653	4.18652
8.03	4.8e-17	4.8e-17	4.82e-17	4.82e-17	4.82e-17	4.18163	4.1816	4.18157	4.18155	4.18154
8.04	4.8e-17	4.8e-17	4.82e-17	4.82e-17	4.82e-17	4.17665	4.17662	4.17659	4.17657	4.17656
8.05	4.8e-17	4.8e-17	4.82e-17	4.82e-17	4.82e-17	4.17167	4.17164	4.17161	4.17159	4.17158
8.06	4.79e-17	4.8e-17	4.82e-17	4.82e-17	4.82e-17	4.16669	4.16666	4.16663	4.16661	4.1666
8.07	4.79e-17	4.8e-17	4.82e-17	4.82e-17	4.82e-17	4.16171	4.16168	4.16165	4.16163	4.16162
8.08	4.79e-17	4.8e-17	4.81e-17	4.82e-17	4.82e-17	4.15673	4.1567	4.15667	4.15665	4.15664
8.09	4.79e-17	4.8e-17	4.81e-17	4.82e-17	4.82e-17	4.15175	4.15173	4.15169	4.15167	4.15166
8.1	4.79e-17	4.8e-17	4.81e-17	4.82e-17	4.82e-17	4.14677	4.14675	4.14671	4.14669	4.14668
8.11	4.79e-17	4.8e-17	4.81e-17	4.82e-17	4.82e-17	4.14179	4.14177	4.14173	4.14171	4.14171
8.12	4.79e-17	4.8e-17	4.81e-17	4.82e-17	4.82e-17	4.13681	4.13679	4.13675	4.13673	4.13673
8.13	4.79e-17	4.8e-17	4.81e-17	4.82e-17	4.82e-17	4.13183	4.13181	4.13177	4.13176	4.13175
8.14	4.79e-17	4.8e-17	4.81e-17	4.82e-17	4.82e-17	4.12685	4.12683	4.12679	4.12678	4.12677
8.15	4.79e-17	4.8e-17	4.81e-17	4.82e-17	4.82e-17	4.12188	4.12185	4.12181	4.1218	4.12179
8.16	4.79e-17	4.8e-17	4.81e-17	4.82e-17	4.82e-17	4.1169	4.11687	4.11683	4.11682	4.11681
8.17	4.79e-17	4.8e-17	4.81e-17	4.82e-17	4.82e-17	4.11192	4.11189	4.11186	4.11184	4.11183
8.18	4.79e-17	4.8e-17	4.81e-17	4.82e-17	4.82e-17	4.10694	4.10691	4.10688	4.10686	4.10685
8.19	4.79e-17	4.8e-17	4.81e-17	4.82e-17	4.82e-17	4.10196	4.10193	4.1019	4.10188	4.10187
8.2	4.79e-17	4.8e-17	4.81e-17	4.82e-17	4.82e-17	4.09698	4.09695	4.09692	4.0969	4.09689
8.21	4.79e-17	4.8e-17	4.81e-17	4.82e-17	4.82e-17	4.092	4.09197	4.09194	4.09192	4.09191
8.22	4.79e-17	4.8e-17	4.81e-17	4.82e-17	4.82e-17	4.08702	4.08699	4.08696	4.08694	4.08693
8.23	4.79e-17	4.8e-17	4.81e-17	4.82e-17	4.82e-17	4.08204	4.08201	4.08198	4.08196	4.08195
8.24	4.79e-17	4.8e-17	4.81e-17	4.82e-17	4.82e-17	4.07706	4.07703	4.077	4.07698	4.07697
8.25	4.79e-17	4.8e-17	4.81e-17	4.82e-17	4.82e-17	4.07208	4.07206	4.07202	4.072	4.07199
8.26	4.79e-17	4.8e-17	4.81e-17	4.82e-17	4.82e-17	4.0671	4.06708	4.06704	4.06702	4.06701
8.27	4.79e-17	4.8e-17	4.81e-17	4.82e-17	4.82e-17	4.06212	4.0621	4.06206	4.06204	4.06204
8.28	4.79e-17	4.8e-17	4.81e-17	4.82e-17	4.82e-17	4.05714	4.05712	4.05708	4.05706	4.05706
8.29	4.79e-17	4.8e-17	4.81e-17	4.82e-17	4.82e-17	4.05216	4.05214	4.0521	4.05209	4.05208
8.3	4.79e-17	4.8e-17	4.81e-17	4.82e-17	4.82e-17	4.04718	4.04716	4.04712	4.04711	4.0471
8.31	4.79e-17	4.8e-17	4.81e-17	4.82e-17	4.82e-17	4.0422	4.04218	4.04214	4.04213	4.04212
8.32	4.79e-17	4.8e-17	4.81e-17	4.82e-17	4.82e-17	4.03723	4.0372	4.03716	4.03715	4.03714
8.33	4.79e-17	4.8e-17	4.81e-17	4.82e-17	4.82e-17	4.03225	4.03222	4.03219	4.03217	4.03216
8.34	4.79e-17	4.8e-17	4.81e-17	4.82e-17	4.82e-17	4.02727	4.02724	4.02721	4.02719	4.02718
8.35	4.79e-17	4.8e-17	4.81e-17	4.82e-17	4.82e-17	4.02229	4.02226	4.02223	4.02221	4.0222
8.36	4.79e-17	4.8e-17	4.81e-17	4.81e-17	4.82e-17	4.01731	4.01728	4.01725	4.01723	4.01722
8.37	4.79e-17	4.8e-17	4.81e-17	4.81e-17	4.82e-17	4.01233	4.0123	4.01227	4.01225	4.01224
8.38	4.79e-17	4.8e-17	4.81e-17	4.81e-17	4.82e-17	4.00735	4.00732	4.00729	4.00727	4.00726
8.39	4.79e-17	4.8e-17	4.81e-17	4.81e-17	4.82e-17	4.00237	4.00234	4.00231	4.00229	4.00228
8.4	4.79e-17	4.8e-17	4.81e-17	4.81e-17	4.82e-17	3.99739	3.99736	3.99733	3.99731	3.9973
8.41	4.79e-17	4.8e-17	4.81e-17	4.81e-17	4.82e-17	3.99241	3.99238	3.99235	3.99233	3.99232
8.42	4.79e-17	4.8e-17	4.81e-17	4.81e-17	4.82e-17	3.98743	3.98741	3.98737	3.98735	3.98734
8.43	4.79e-17	4.8e-17	4.81e-17	4.81e-17	4.82e-17	3.98245	3.98243	3.98239	3.98237	3.98236
8.44	4.79e-17	4.8e-17	4.81e-17	4.81e-17	4.82e-17	3.97747	3.97745	3.97741	3.97739	3.97739
8.45	4.79e-17	4.8e-17	4.81e-17	4.81e-17	4.82e-17	3.97249	3.97247	3.97243	3.97241	3.97241
8.46	4.79e-17	4.8e-17	4.81e-17	4.81e-17	4.82e-17	3.96751	3.96749	3.96745	3.96744	3.96743
8.47	4.79e-17	4.8e-17	4.81e-17	4.81e-17	4.82e-17	3.96253	3.96251	3.96247	3.96246	3.96245
8.48	4.79e-17	4.8e-17	4.81e-17	4.81e-17	4.82e-17	3.95756	3.95753	3.95749	3.95748	3.95747
8.49	4.79e-17	4.8e-17	4.81e-17	4.81e-17	4.82e-17	3.95258	3.95255	3.95251	3.9525	3.95249
8.5	4.79e-17	4.8e-17	4.81e-17	4.81e-17	4.82e-17	3.9476	3.94757	3.94754	3.94752	3.94751
8.51	4.79e-17	4.79e-17	4.81e-17	4.81e-17	4.82e-17	3.94262	3.94259	3.94256	3.94254	3.94253
8.52	4.79e-17	4.79e-17	4.81e-17	4.81e-17	4.82e-17	3.93764	3.93761	3.93758	3.93756	3.93755
8.53	4.79e-17	4.79e-17	4.81e-17	4.81e-17	4.82e-17	3.93266	3.93263	3.9326	3.93258	3.93257
8.54	4.79e-17	4.79e-17	4.81e-17	4.81e-17	4.81e-17	3.92768	3.92765	3.92762	3.9276	3.92759
8.55	4.79e-17	4.79e-17	4.81e-17	4.81e-17	4.81e-17	3.9227	3.92267	3.92264	3.92262	3.92261
8.56	4.79e-17	4.79e-17	4.81e-17	4.81e-17	4.81e-17	3.91772	3.91769	3.91766	3.91764	3.91763
8.57	4.79e-17	4.79e-17	4.81e-17	4.81e-17	4.81e-17	3.91274	3.91271	3.91268	3.91266	3.91265
8.58	4.79e-17	4.79e-17	4.81e-17	4.81e-17	4.81e-17	3.90776	3.90774	3.9077	3.90768	3.90767
8.59	4.79e-17	4.79e-17	4.81e-17	4.81e-17	4.81e-17	3.90278	3.90276	3.90272	3.9027	3.90269
8.6	4.78e-17	4.79e-17	4.81e-17	4.81e-17	4.81e-17	3.8978	3.89778	3.89774	3.89772	3.89772
8.61	4.78e-17	4.79e-17	4.81e-17	4.81e-17	4.81e-17	3.89282	3.8928	3.89276	3.89274	3.89274
8.62	4.78e-17	4.79e-17	4.81e-17	4.81e-17	4.81e-17	3.88784	3.88782	3.88778	3.88777	3.88776
8.63	4.78e-17	4.79e-17	4.8e-17	4.81e-17	4.81e-17	3.88286	3.88284	3.8828	3.88279	3.88278
8.64	4.78e-17	4.79e-17	4.8e-17	4.81e-17	4.81e-17	3.87788	3.87786	3.87782	3.87781	3.8778
8.65	4.78e-17	4.79e-17	4.8e-17	4.81e-17	4.81e-17	3.87291	3.87288	3.87284	3.87283	3.87282
8.66	4.78e-17	4.79e-17	4.8e-17	4.81e-17	4.81e-17	3.86793	3.8679	3.86787	3.86785	3.86784
8.67	4.78e-17	4.79e-17	4.8e-17	4.81e-17	4.81e-17	3.86295	3.86292	3.86289	3.86287	3.86286
8.68	4.78e-17	4.79e-17	4.8e-17	4.81e-17	4.81e-17	3.85797	3.85794	3.85791	3.85789	3.85788
8.69	4.78e-17	4.79e-17	4.8e-17	4.81e-17	4.81e-17	3.85299	3.85296	3.85293	3.85291	3.8529
8.7	4.78e-17	4.79e-17	4.8e-17	4.81e-17	4.81e-17	3.84801	3.84798	3.84795	3.84793	3.84792
8.71	4.78e-17	4.79e-17	4.8e-17	4.81e-17	4.81e-17	3.84303	3.843	3.84297	3.84295	3.84294
8.72	4.78e-17	4.79e-17	4.8e-17	4.81e-17	4.81e-17	3.83805	3.83802	3.83799	3.83797	3.83796
8.73	4.78e-17	4.79e-17	4.8e-17	4.81e-17	4.81e-17	3.83307	3.83304	3.83301	3.83299	3.83298
8.74	4.78e-17	4.79e-17	4.8e-17	4.81e-17	4.81e-17	3.82809	3.82806	3.82803	3.82801	3.828
8.75	4.78e-17	4.79e-17	4.8e-17	4.81e-17	4.81e-17	3.82311	3.82309	3.82305	3.82303	3.82302
8.76	4.78e-17	4.79e-17	4.8e-17	4.81e-17	4.81e-17	3.81813	3.81811	3.81807	3.81805	3.81804
8.77	4.78e-17	4.79e-17	4.8e-17	4.81e-17	4.81e-17	3.81315	3.81313	3.81309	3.81307	3.81307
8.78	4.78e-17	4.79e-17	4.8e-17	4.81e-17	4.81e-17	3.80817	3.80815	3.80811	3.80809	3.80809
8.79	4.78e-17	4.79e-17	4.8e-17	4.81e-17	4.81e-17	3.80319	3.80317	3.80313	3.80312	3.80311
8.8	4.78e-17	4.79e-17	4.8e-17	4.81e-17	4.81e-17	3.79821	3.79819	3.79815	3.79814	3.79813
8.81	4.78e-17	4.79e-17	4.8e-17	4.81e-17	4.81e-17	3.79324	3.79321	3.79317	3.79316	3.79315
8.82	4.78e-17	4.79e-17	4.8e-17	4.81e-17	4.81e-17	3.78826	3.78823	3.78819	3.78818	3.78817
8.83	4.78e-17	4.79e-17	4.8e-17	4.81e-17	4.81e-17	3.78328	3.78325	3.78322	3.7832	3.78319
8.84	4.78e-17	4.79e-17	4.8e-17	4.81e-17	4.81e-17	3.7783	3.77827	3.77824	3.77822	3.77821
8.85	4.78e-17	4.79e-17	4.8e-17	4.81e-17	4.81e-17	3.77332	3.77329	3.77326	3.77324	3.77323
8.86	4.78e-17	4.79e-17	4.8e-17	4.81e-17	4.81e-17	3.76834	3.76831	3.76828	3.76826	3.76825
8.87	4.78e-17	4.79e-17	4.8e-17	4.81e-17	4.81e-17	3.76336	3.76333	3.7633	3.76328	3.76327
8.88	4.78e-17	4.79e-17	4.8e-17	4.81e-17	4.81e-17	3.75838	3.75835	3.75832	3.7583	3.75829
8.89	4.78e-17	4.79e-17	4.8e-17	4.81e-17	4.81e-17	3.7534	3.75337	3.75334	3.75332	3.75331
8.9	4.78e-17	4.79e-17	4.8e-17	4.81e-17	4.81e-17	3.74842	3.74839	3.74836	3.74834	3.74833
8.91	4.78e-17	4.79e-17	4.8e-17	4.81e-17	4.81e-17	3.74344	3.74342	3.74338	3.74336	3.74335
8.92	4.78e-17	4.79e-17	4.8e-17	4.81e-17	4.81e-17	3.73846	3.73844	3.7384	3.73838	3.73837
8.93	4.78e-17	4.79e-17	4.8e-17	4.81e-17	4.81e-17	3.73348	3.73346	3.73342	3.7334	3.7334
8.94	4.78e-17	4.79e-17	4.8e-17	4.81e-17	4.81e-17	3.7285	3.72848	3.72844	3.72842	3.72842
8.95	4.78e-17	4.79e-17	4.8e-17	4.81e-17	4.81e-17	3.72352	3.7235	3.72346	3.72345	3.72344
8.96	4.78e-17	4.79e-17	4.8e-17	4.81e-17	4.81e-17	3.71854	3.71852	3.71848	3.71847	3.71846
8.97	4.78e-17	4.79e-17	4.8e-17	4.81e-17	4.81e-17	3.71356	3.71354	3.7135	3.71349	3.71348
8.98	4.78e-17	4.79e-17	4.8e-17	4.81e-17	4.81e-17	3.70859	3.70856	3.70852	3.70851	3.7085
8.99	4.78e-17	4.79e-17	4.8e-17	4.81e-17	4.81e-17	3.70361	3.70358	3.70355	3.70353	3.70352
9	4.78e-17	4.79e-17	4.8e-17	4.81e-17	4.81e-17	3.69863	3.6986	3.69857	3.69855	3.69854
9.01	4.78e-17	4.79e-17	4.8e-17	4.81e-17	4.81e-17	3.69365	3.69362	3.69359	3.69357	3.69356
9.02	4.78e-17	4.79e-17	4.8e-17	4.81e-17	4.81e-17	3.68867	3.68864	3.68861	3.68859	3.68858
9.03	4.78e-17	4.79e-17	4.8e-17	4.81e-17	4.81e-17	3.68369	3.68366	3.68363	3.68361	3.6836
9.04	4.78e-17	4.79e-17	4.8e-17	4.81e-17	4.81e-17	3.67871	3.67868	3.67865	3.67863	3.67862
9.05	4.78e-17	4.79e-17	4.8e-17	4.81e-17	4.81e-17	3.67373	3.6737	3.67367	3.67365	3.67364
9.06	4.78e-17	4.79e-17	4.8e-17	4.81e-17	4.81e-17	3.66875	3.66872	3.66869	3.66867	3.66866
9.07	4.78e-17	4.79e-17	4.8e-17	4.81e-17	4.81e-17	3.66377	3.66374	3.66371	3.66369	3.66368
9.08	4.78e-17	4.79e-17	4.8e-17	4.81e-17	4.81e-17	3.65879	3.65877	3.65873	3.65871	3.6587
9.09	4.78e-17	4.79e-17	4.8e-17	4.81e-17	4.81e-17	3.65381	3.65379	3.65375	3.65373	3.65372
9.1	4.78e-17	4.79e-17	4.8e-17	4.81e-17	4.81e-17	3.64883	3.64881	3.64877	3.64875	3.64875
9.11	4.78e-17	4.79e-17	4.8e-17	4.81e-17	4.81e-17	3.64385	3.64383	3.64379	3.64377	3.64377
9.12	4.78e-17	4.79e-17	4.8e-17	4.81e-17	4.81e-17	3.63887	3.63885	3.63881	3.6388	3.63879
9.13	4.78e-17	4.79e-17	4.8e-17	4.81e-17	4.81e-17	3.63389	3.63387	3.63383	3.63382	3.63381
9.14	4.78e-17	4.79e-17	4.8e-17	4.81e-17	4.81e-17	3.62892	3.62889	3.62885	3.62884	3.62883
9.15	4.78e-17	4.79e-17	4.8e-17	4.81e-17	4.81e-17	3.62394	3.62391	3.62387	3.62386	3.62385
9.16	4.78e-17	4.79e-17	4.8e-17	4.81e-17	4.81e-17	3.61896	3.61893	3.6189	3.61888	3.61887
9.17	4.78e-17	4.79e-17	4.8e-17	4.81e-17	4.81e-17	3.61398	3.61395	3.61392	3.6139	3.61389
9.18	4.78e-17	4.79e-17	4.8e-17	4.81e-17	4.81e-17	3.609	3.60897	3.60894	3.60892	3.60891
9.19	4.78e-17	4.79e-17	4.8e-17	4.81e-17	4.81e-17	3.60402	3.60399	3.60396	3.60394	3.60393
9.2	4.78e-17	4.79e-17	4.8e-17	4.81e-17	4.81e-17	3.59904	3.59901	3.59898	3.59896	3.59895
9.21	4.78e-17	4.79e-17	4.8e-17	4.81e-17	4.81e-17	3.59406	3.59403	3.594	3.59398	3.59397
9.22	4.78e-17	4.79e-17	4.8e-17	4.81e-17	4.81e-17	3.58908	3.58905	3.58902	3.589	3.58899
9.23	4.78e-17	4.79e-17	4.8e-17	4.81e-17	4.81e-17	3.5841	3.58407	3.58404	3.58402	3.58401
9.24	4.78e-17	4.79e-17	4.8e-17	4.81e-17	4.81e-17	3.57912	3.5791	3.57906	3.57904	3.57903
9.25	4.78e-17	4.79e-17	4.8e-17	4.81e-17	4.81e-17	3.57414	3.57412	3.57408	3.57406	3.57405
9.26	4.78e-17	4.79e-17	4.8e-17	4.8e-17	4.81e-17	3.56916	3.56914	3.5691	3.56908	3.56908
9.27	4.78e-17	4.79e-17	4.8e-17	4.8e-17	4.81e-17	3.56418	3.56416	3.56412	3.5641	3.5641
9.28	4.78e-17	4.79e-17	4.8e-17	4.8e-17	4.81e-17	3.5592	3.55918	3.55914	3.55913	3.55912
9.29	4.78e-17	4.79e-17	4.8e-17	4.8e-17	4.81e-17	3.55422	3.5542	3.55416	3.55415	3.55414
9.3	4.78e-17	4.79e-17	4.8e-17	4.8e-17	4.81e-17	3.54924	3.54922	3.54918	3.54917	3.54916
9.31	4.78e-17	4.79e-17	4.8e-17	4.8e-17	4.81e-17	3.54427	3.54424	3.5442	3.54419	3.54418
9.32	4.78e-17	4.79e-17	4.8e-17	4.8e-17	4.81e-17	3.53929	3.53926	3.53923	3.53921	3.5392
9.33	4.78e-17	4.79e-17	4.8e-17	4.8e-17	4.81e-17	3.53431	3.53428	3.53425	3.53423	3.53422
9.34	4.78e-17	4.79e-17	4.8e-17	4.8e-17	4.81e-17	3.52933	3.5293	3.52927	3.52925	3.52924
9.35	4.78e-17	4.79e-17	4.8e-17	4.8e-17	4.81e-17	3.52435	3.52432	3.52429	3.52427	3.52426
9.36	4.78e-17	4.79e-17	4.8e-17	4.8e-17	4.81e-17	3.51937	3.51934	3.51931	3.51929	3.51928
9.37	4.78e-17	4.79e-17	4.8e-17	4.8e-17	4.81e-17	3.51439	3.51436	3.51433	3.51431	3.5143
9.38	4.78e-17	4.79e-17	4.8e-17	4.8e-17	4.81e-17	3.50941	3.50938	3.50935	3.50933	3.50932
9.39	4.78e-17	4.79e-17	4.8e-17	4.8e-17	4.81e-17	3.50443	3.5044	3.50437	3.50435	3.50434
9.4	4.78e-17	4.79e-17	4.8e-17	4.8e-17	4.81e-17	3.49945	3.49942	3.49939	3.49937	3.49936
9.41	4.78e-17	4.79e-17	4.8e-17	4.8e-17	4.81e-17	3.49447	3.49445	3.49441	3.49439	3.49438
9.42	4.78e-17	4.79e-17	4.8e-17	4.8e-17	4.81e-17	3.48949	3.48947	3.48943	3.48941	3.4894
9.43	4.78e-17	4.79e-17	4.8e-17	4.8e-17	4.81e-17	3.48451	3.48449	3.48445	3.48443	3.48443
9.44	4.78e-17	4.79e-17	4.8e-17	4.8e-17	4.81e-17	3.47953	3.47951	3.47947	3.47945	3.47945
9.45	4.78e-17	4.79e-17	4.8e-17	4.8e-17	4.81e-17	3.47455	3.47453	3.47449	3.47448	3.47447
9.46	4.78e-17	4.79e-17	4.8e-17	4.8e-17	4.81e-17	3.46957	3.46955	3.46951	3.4695	3.46949
9.47	4.78e-17	4.79e-17	4.8e-17	4.8e-17	4.81e-17	3.4646	3.46457	3.46453	3.46452	3.46451
9.48	4.78e-17	4.79e-17	4.8e-17	4.8e-17	4.81e-17	3.45962	3.45959	3.45955	3.45954	3.45953
9.49	4.78e-17	4.79e-17	4.8e-17	4.8e-17	4.81e-17	3.45464	3.45461	3.45458	3.45456	3.45455
9.5	4.78e-17	4.79e-17	4.8e-17	4.8e-17	4.81e-17	3.44966	3.44963	3.4496	3.44958	3.44957
9.51	4.78e-17	4.79e-17	4.8e-17	4.8e-17	4.81e-17	3.44468	3.44465	3.44462	3.4446	3.44459
9.52	4.78e-17	4.79e-17	4.8e-17	4.8e-17	4.81e-17	3.4397	3.43967	3.43964	3.43962	3.43961
9.53	4.78e-17	4.79e-17	4.8e-17	4.8e-17	4.81e-17	3.43472	3.43469	3.43466	3.43464	3.43463
9.54	4.78e-17	4.79e-17	4.8e-17	4.8e-17	4.81e-17	3.42974	3.42971	3.42968	3.42966	3.42965
9.55	4.78e-17	4.79e-17	4.8e-17	4.8e-17	4.81e-17	3.42476	3.42473	3.4247	3.42468	3.42467
9.56	4.78e-17	4.79e-17	4.8e-17	4.8e-17	4.81e-17	3.41978	3.41975	3.41972	3.4197	3.41969
9.57	4.78e-17	4.79e-17	4.8e-17	4.8e-17	4.81e-17	3.4148	3.41478	3.41474	3.41472	3.41471
9.58	4.78e-17	4.79e-17	4.8e-17	4.8e-17	4.81e-17	3.40982	3.4098	3.40976	3.40974	3.40973
9.59	4.78e-17	4.79e-17	4.8e-17	4.8e-17	4.81e-17	3.40484	3.40482	3.40478	3.40476	3.40476
9.6	4.78e-17	4.79e-17	4.8e-17	4.8e-17	4.81e-17	3.39986	3.39984	3.3998	3.39978	3.39978
9.61	4.78e-17	4.79e-17	4.8e-17	4.8e-17	4.81e-17	3.39488	3.39486	3.39482	3.39481	3.3948
9.62	4.78e-17	4.79e-17	4.8e-17	4.8e-17	4.81e-17	3.3899	3.38988	3.38984	3.38983	3.38982
9.63	4.78e-17	4.79e-17	4.8e-17	4.8e-17	4.81e-17	3.38493	3.3849	3.38486	3.38485	3.38484
9.64	4.78e-17	4.79e-17	4.8e-17	4.8e-17	4.81e-17	3.37995	3.37992	3.37988	3.37987	3.37986
9.65	4.78e-17	4.79e-17	4.8e-17	4.8e-17	4.81e-17	3.37497	3.37494	3.37491	3.37489	3.37488
9.66	4.78e-17	4.79e-17	4.8e-17	4.8e-17	4.81e-17	3.36999	3.36996	3.36993	3.36991	3.3699
9.67	4.78e-17	4.79e-17	4.8e-17	4.8e-17	4.81e-17	3.36501	3.36498	3.36495	3.36493	3.36492
9.68	4.78e-17	4.79e-17	4.8e-17	4.8e-17	4.81e-17	3.36003	3.36	3.35997	3.35995	3.35994
9.69	4.78e-17	4.79e-17	4.8e-17	4.8e-17	4.81e-17	3.35505	3.35502	3.35499	3.35497	3.35496
9.7	4.78e-17	4.79e-17	4.8e-17	4.8e-17	4.81e-17	3.35007	3.35004	3.35001	3.34999	3.34998
9.71	4.78e-17	4.79e-17	4.8e-17	4.8e-17	4.81e-17	3.34509	3.34506	3.34503	3.34501	3.345
9.72	4.78e-17	4.79e-17	4.8e-17	4.8e-17	4.81e-17	3.34011	3.34008	3.34005	3.34003	3.34002
9.73	4.78e-17	4.79e-17	4.8e-17	4.8e-17	4.81e-17	3.33513	3.3351	3.33507	3.33505	3.33504
9.74	4.78e-17	4.79e-17	4.8e-17	4.8e-17	4.81e-17	3.33015	3.33013	3.33009	3.33007	3.33006
9.75	4.78e-17	4.79e-17	4.8e-17	4.8e-17	4.81e-17	3.32517	3.32515	3.32511	3.32509	3.32508
9.76	4.78e-17	4.79e-17	4.8e-17	4.8e-17	4.81e-17	3.32019	3.32017	3.32013	3.32011	3.32011
9.77	4.78e-17	4.79e-17	4.8e-17	4.8e-17	4.81e-17	3.31521	3.31519	3.31515	3.31513	3.31513
9.78	4.78e-17	4.79e-17	4.8e-17	4.8e-17	4.81e-17	3.31023	3.31021	3.31017	3.31016	3.31015
9.79	4.78e-17	4.78e-17	4.8e-17	4.8e-17	4.81e-17	3.30525	3.30523	3.30519	3.30518	3.30517
9.8	4.78e-17	4.78e-17	4.8e-17	4.8e-17	4.81e-17	3.30028	3.30025	3.30021	3.3002	3.30019
9.81	4.78e-17	4.78e-17	4.8e-17	4.8e-17	4.81e-17	3.2953	3.29527	3.29523	3.29522	3.29521
9.82	4.78e-17	4.78e-17	4.8e-17	4.8e-17	4.81e-17	3.29032	3.29029	3.29026	3.29024	3.29023
9.83	4.78e-17	4.78e-17	4.8e-17	4.8e-17	4.81e-17	3.28534	3.28531	3.28528	3.28526	3.28525
9.84	4.78e-17	4.78e-17	4.8e-17	4.8e-17	4.81e-17	3.28036	3.28033	3.2803	3.28028	3.28027
9.85	4.78e-17	4.78e-17	4.8e-17	4.8e-17	4.81e-17	3.27538	3.27535	3.27532	3.2753	3.27529
9.86	4.78e-17	4.78e-17	4.8e-17	4.8e-17	4.81e-17	3.2704	3.27037	3.27034	3.27032	3.27031
9.87	4.78e-17	4.78e-17	4.8e-17	4.8e-17	4.81e-17	3.26542	3.26539	3.26536	3.26534	3.26533
9.88	4.78e-17	4.78e-17	4.8e-17	4.8e-17	4.81e-17	3.26044	3.26041	3.26038	3.26036	3.26035
9.89	4.78e-17	4.78e-17	4.8e-17	4.8e-17	4.81e-17	3.25546	3.25543	3.2554	3.25538	3.25537
9.9	4.78e-17	4.78e-17	4.8e-17	4.8e-17	4.81e-17	3.25048	3.25046	3.25042	3.2504	3.25039
9.91	4.78e-17	4.78e-17	4.8e-17	4.8e-17	4.81e-17	3.2455	3.24548	3.24544	3.24542	3.24541
9.92	4.78e-17	4.78e-17	4.8e-17	4.8e-17	4.8e-17	3.24052	3.2405	3.24046	3.24044	3.24044
9.93	4.78e-17	4.78e-17	4.8e-17	4.8e-17	4.8e-17	3.23554	3.23552	3.23548	3.23546	3.23546
9.94	4.78e-17	4.78e-17	4.8e-17	4.8e-17	4.8e-17	3.23056	3.23054	3.2305	3.23049	3.23048
9.95	4.78e-17	4.78e-17	4.8e-17	4.8e-17	4.8e-17	3.22558	3.22556	3.22552	3.22551	3.2255
9.96	4.78e-17	4.78e-17	4.8e-17	4.8e-17	4.8e-17	3.22061	3.22058	3.22054	3.22053	3.22052
9.97	4.78e-17	4.78e-17	4.8e-17	4.8e-17	4.8e-17	3.21563	3.2156	3.21556	3.21555	3.21554
9.98	4.78e-17	4.78e-17	4.8e-17	4.8e-17	4.8e-17	3.21065	3.21062	3.21059	3.21057	3.21056
9.99	4.78e-17	4.78e-17	4.8e-17	4.8e-17	4.8e-17	3.20567	3.20564	3.20561	3.20559	3.20558
10	4.78e-17	4.78e-17	4.8e-17	4.8e-17	4.8e-17	3.20069	3.20066	3.20063	3.20061	3.2006
10.01	4.78e-17	4.78e-17	4.8e-17	4.8e-17	4.8e-17	3.19571	3.19568	3.19565	3.19563	3.19562
10.02	4.78e-17	4.78e-17	4.8e-17	4.8e-17	4.8e-17	3.19073	3.1907	3.19067	3.19065	3.19064
10.03	4.78e-17	4.78e-17	4.8e-17	4.8e-17	4.8e-17	3.18575	3.18572	3.18569	3.18567	3.18566
10.04	4.78e-17	4.78e-17	4.8e-17	4.8e-17	4.8e-17	3.18077	3.18074	3.18071	3.18069	3.18068
10.05	4.78e-17	4.78e-17	4.8e-17	4.8e-17	4.8e-17	3.17579	3.17576	3.17573	3.17571	3.1757
10.06	4.78e-17	4.78e-17	4.8e-17	4.8e-17	4.8e-17	3.17081	3.17078	3.17075	3.17073	3.17072
10.07	4.78e-17	4.78e-17	4.8e-17	4.8e-17	4.8e-17	3.16583	3.16581	3.16577	3.16575	3.16574
10.08	4.78e-17	4.78e-17	4.8e-17	4.8e-17	4.8e-17	3.16085	3.16083	3.16079	3.16077	3.16076
10.09	4.78e-17	4.78e-17	4.8e-17	4.8e-17	4.8e-17	3.15587	3.15585	3.15581	3.15579	3.15579
10.1	4.78e-17	4.78e-17	4.8e-17	4.8e-17	4.8e-17	3.15089	3.15087	3.15083	3.15081	3.15081
10.11	4.78e-17	4.78e-17	4.8e-17	4.8e-17	4.8e-17	3.14591	3.14589	3.14585	3.14584	3.14583
10.12	4.78e-17	4.78e-17	4.8e-17	4.8e-17	4.8e-17	3.14093	3.14091	3.14087	3.14086	3.14085
10.13	4.78e-17	4.78e-17	4.8e-17	4.8e-17	4.8e-17	3.13596	3.13593	3.13589	3.13588	3.13587
10.14	4.78e-17	4.78e-17	4.8e-17	4.8e-17	4.8e-17	3.13098	3.13095	3.13091	3.1309	3.13089
10.15	4.78e-17	4.78e-17	4.8e-17	4.8e-17	4.8e-17	3.126	3.12597	3.12594	3.12592	3.12591
10.16	4.78e-17	4.78e-17	4.8e-17	4.8e-17	4.8e-17	3.12102	3.12099	3.12096	3.12094	3.12093
10.17	4.78e-17	4.78e-17	4.8e-17	4.8e-17	4.8e-17	3.11604	3.11601	3.11598	3.11596	3.11595
10.18	4.78e-17	4.78e-17	4.8e-17	4.8e-17	4.8e-17	3.11106	3.11103	3.111	3.11098	3.11097
10.19	4.78e-17	4.78e-17	4.8e-17	4.8e-17	4.8e-17	3.10608	3.10605	3.10602	3.106	3.10599
10.2	4.78e-17	4.78e-17	4.8e-17	4.8e-17	4.8e-17	3.1011	3.10107	3.10104	3.10102	3.10101
10.21	4.78e-17	4.78e-17	4.8e-17	4.8e-17	4.8e-17	3.09612	3.09609	3.09606	3.09604	3.09603
10.22	4.78e-17	4.78e-17	4.8e-17	4.8e-17	4.8e-17	3.09114	3.09111	3.09108	3.09106	3.09105
10.23	4.78e-17	4.78e-17	4.8e-17	4.8e-17	4.8e-17	3.08616	3.08614	3.0861	3.08608	3.08607
10.24	4.78e-17	4.78e-17	4.8e-17	4.8e-17	4.8e-17	3.08118	3.08116	3.08112	3.0811	3.08109
10.25	4.78e-17	4.78e-17	4.8e-17	4.8e-17	4.8e-17	3.0762	3.07618	3.07614	3.07612	3.07612
10.26	4.78e-17	4.78e-17	4.8e-17	4.8e-17	4.8e-17	3.07122	3.0712	3.07116	3.07114	3.07114
10.27	4.78e-17	4.78e-17	4.8e-17	4.8e-17	4.8e-17	3.06624	3.06622	3.06618	3.06617	3.06616
10.28	4.78e-17	4.78e-17	4.8e-17	4.8e-17	4.8e-17	3.06126	3.06124	3.0612	3.06119	3.06118
10.29	4.77e-17	4.78e-17	4.8e-17	4.8e-17	4.8e-17	3.05629	3.05626	3.05622	3.05621	3.0562
10.3	4.77e-17	4.78e-17	4.8e-17	4.8e-17	4.8e-17	3.05131	3.05128	3.05124	3.05123	3.05122
10.31	4.77e-17	4.78e-17	4.8e-17	4.8e-17	4.8e-17	3.04633	3.0463	3.04627	3.04625	3.04624
10.32	4.77e-17	4.78e-17	4.8e-17	4.8e-17	4.8e-17	3.04135	3.04132	3.04129	3.04127	3.04126
10.33	4.77e-17	4.78e-17	4.8e-17	4.8e-17	4.8e-17	3.03637	3.03634	3.03631	3.03629	3.03628
10.34	4.77e-17	4.78e-17	4.8e-17	4.8e-17	4.8e-17	3.03139	3.03136	3.03133	3.03131	3.0313
10.35	4.77e-17	4.78e-17	4.8e-17	4.8e-17	4.8e-17	3.02641	3.02638	3.02635	3.02633	3.02632
10.36	4.77e-17	4.78e-17	4.8e-17	4.8e-17	4.8e-17	3.02143	3.0214	3.02137	3.02135	3.02134
10.37	4.77e-17	4.78e-17	4.8e-17	4.8e-17	4.8e-17	3.01645	3.01642	3.01639	3.01637	3.01636
10.38	4.77e-17	4.78e-17	4.8e-17	4.8e-17	4.8e-17	3.01147	3.01144	3.01141	3.01139	3.01138
10.39	4.77e-17	4.78e-17	4.8e-17	4.8e-17	4.8e-17	3.00649	3.00646	3.00643	3.00641	3.0064
10.4	4.77e-17	4.78e-17	4.8e-17	4.8e-17	4.8e-17	3.00151	3.00149	3.00145	3.00143	3.00142
10.41	4.77e-17	4.78e-17	4.8e-17	4.8e-17	4.8e-17	2.99653	2.99651	2.99647	2.99645	2.99644
10.42	4.77e-17	4.78e-17	4.8e-17	4.8e-17	4.8e-17	2.99155	2.99153	2.99149	2.99147	2.99147
10.43	4.77e-17	4.78e-17	4.8e-17	4.8e-17	4.8e-17	2.98657	2.98655	2.98651	2.98649	2.98649
10.44	4.77e-17	4.78e-17	4.8e-17	4.8e-17	4.8e-17	2.98159	2.98157	2.98153	2.98152	2.98151
10.45	4.77e-17	4.78e-17	4.8e-17	4.8e-17	4.8e-17	2.97661	2.97659	2.97655	2.97654	2.97653
10.46	4.77e-17	4.78e-17	4.8e-17	4.8e-17	4.8e-17	2.97164	2.97161	2.97157	2.97156	2.97155
10.47	4.77e-17	4.78e-17	4.8e-17	4.8e-17	4.8e-17	2.96666	2.96663	2.96659	2.96658	2.96657
10.48	4.77e-17	4.78e-17	4.8e-17	4.8e-17	4.8e-17	2.96168	2.96165	2.96162	2.9616	2.96159
10.49	4.77e-17	4.78e-17	4.8e-17	4.8e-17	4.8e-17	2.9567	2.95667	2.95664	2.95662	2.95661
10.5	4.77e-17	4.78e-17	4.79e-17	4.8e-17	4.8e-17	2.95172	2.95169	2.95166	2.95164	2.95163
10.51	4.77e-17	4.78e-17	4.79e-17	4.8e-17	4.8e-17	2.94674	2.94671	2.94668	2.94666	2.94665
10.52	4.77e-17	4.78e-17	4.79e-17	4.8e-17	4.8e-17	2.94176	2.94173	2.9417	2.94168	2.94167
10.53	4.77e-17	4.78e-17	4.79e-17	4.8e-17	4.8e-17	2.93678	2.93675	2.93672	2.9367	2.93669
10.54	4.77e-17	4.78e-17	4.79e-17	4.8e-17	4.8e-17	2.9318	2.93177	2.93174	2.93172	2.93171
10.55	4.77e-17	4.78e-17	4.79e-17	4.8e-17	4.8e-17	2.92682	2.92679	2.92676	2.92674	2.92673
10.56	4.77e-17	4.78e-17	4.79e-17	4.8e-17	4.8e-17	2.92184	2.92182	2.92178	2.92176	2.92175
10.57	4.77e-17	4.78e-17	4.79e-17	4.8e-17	4.8e-17	2.91686	2.91684	2.9168	2.91678	2.91677
10.58	4.77e-17	4.78e-17	4.79e-17	4.8e-17	4.8e-17	2.91188	2.91186	2.91182	2.9118	2.9118
10.59	4.77e-17	4.78e-17	4.79e-17	4.8e-17	4.8e-17	2.9069	2.90688	2.90684	2.90682	2.90682
10.6	4.77e-17	4.78e-17	4.79e-17	4.8e-17	4.8e-17	2.90192	2.9019	2.90186	2.90185	2.90184
10.61	4.77e-17	4.78e-17	4.79e-17	4.8e-17	4.8e-17	2.89694	2.89692	2.89688	2.89687	2.89686
10.62	4.77e-17	4.78e-17	4.79e-17	4.8e-17	4.8e-17	2.89197	2.89194	2.8919	2.89189	2.89188
10.63	4.77e-17	4.78e-17	4.79e-17	4.8e-17	4.8e-17	2.88699	2.88696	2.88692	2.88691	2.8869
10.64	4.77e-17	4.78e-17	4.79e-17	4.8e-17	4.8e-17	2.88201	2.88198	2.88195	2.88193	2.88192
10.65	4.77e-17	4.78e-17	4.79e-17	4.8e-17	4.8e-17	2.87703	2.877	2.87697	2.87695	2.87694
10.66	4.77e-17	4.78e-17	4.79e-17	4.8e-17	4.8e-17	2.87205	2.87202	2.87199	2.87197	2.87196
10.67	4.77e-17	4.78e-17	4.79e-17	4.8e-17	4.8e-17	2.86707	2.86704	2.86701	2.86699	2.86698
10.68	4.77e-17	4.78e-17	4.79e-17	4.8e-17	4.8e-17	2.86209	2.86206	2.86203	2.86201	2.862
10.69	4.77e-17	4.78e-17	4.79e-17	4.8e-17	4.8e-17	2.85711	2.85708	2.85705	2.85703	2.85702
10.7	4.77e-17	4.78e-17	4.79e-17	4.8e-17	4.8e-17	2.85213	2.8521	2.85207	2.85205	2.85204
10.71	4.77e-17	4.78e-17	4.79e-17	4.8e-17	4.8e-17	2.84715	2.84712	2.84709	2.84707	2.84706
10.72	4.77e-17	4.78e-17	4.79e-17	4.8e-17	4.8e-17	2.84217	2.84214	2.84211	2.84209	2.84208
10.73	4.77e-17	4.78e-17	4.79e-17	4.8e-17	4.8e-17	2.83719	2.83717	2.83713	2.83711	2.8371
10.74	4.77e-17	4.78e-17	4.79e-17	4.8e-17	4.8e-17	2.83221	2.83219	2.83215	2.83213	2.83212
10.75	4.77e-17	4.78e-17	4.79e-17	4.8e-17	4.8e-17	2.82723	2.82721	2.82717	2.82715	2.82715
10.76	4.77e-17	4.78e-17	4.79e-17	4.8e-17	4.8e-17	2.82225	2.82223	2.82219	2.82217	2.82217
10.77	4.77e-17	4.78e-17	4.79e-17	4.8e-17	4.8e-17	2.81727	2.81725	2.81721	2.8172	2.81719
10.78	4.77e-17	4.78e-17	4.79e-17	4.8e-17	4.8e-17	2.81229	2.81227	2.81223	2.81222	2.81221
10.79	4.77e-17	4.78e-17	4.79e-17	4.8e-17	4.8e-17	2.80732	2.80729	2.80725	2.80724	2.80723
10.8	4.77e-17	4.78e-17	4.79e-17	4.8e-17	4.8e-17	2.80234	2.80231	2.80227	2.80226	2.80225
10.81	4.77e-17	4.78e-17	4.79e-17	4.8e-17	4.8e-17	2.79736	2.79733	2.7973	2.79728	2.79727
10.82	4.77e-17	4.78e-17	4.79e-17	4.8e-17	4.8e-17	2.79238	2.79235	2.79232	2.7923	2.79229
10.83	4.77e-17	4.78e-17	4.79e-17	4.8e-17	4.8e-17	2.7874	2.78737	2.78734	2.78732	2.78731
10.84	4.77e-17	4.78e-17	4.79e-17	4.8e-17	4.8e-17	2.78242	2.78239	2.78236	2.78234	2.78233
10.85	4.77e-17	4.78e-17	4.79e-17	4.8e-17	4.8e-17	2.77744	2.77741	2.77738	2.77736	2.77735
10.86	4.77e-17	4.78e-17	4.79e-17	4.8e-17	4.8e-17	2.77246	2.77243	2.7724	2.77238	2.77237
10.87	4.77e-17	4.78e-17	4.79e-17	4.8e-17	4.8e-17	2.76748	2.76745	2.76742	2.7674	2.76739
10.88	4.77e-17	4.78e-17	4.79e-17	4.8e-17	4.8e-17	2.7625	2.76247	2.76244	2.76242	2.76241
10.89	4.77e-17	4.78e-17	4.79e-17	4.8e-17	4.8e-17	2.75752	2.7575	2.75746	2.75744	2.75743
10.9	4.77e-17	4.78e-17	4.79e-17	4.8e-17	4.8e-17	2.75254	2.75252	2.75248	2.75246	2.75245
10.91	4.77e-17	4.78e-17	4.79e-17	4.8e-17	4.8e-17	2.74756	2.74754	2.7475	2.74748	2.74748
10.92	4.77e-17	4.78e-17	4.79e-17	4.8e-17	4.8e-17	2.74258	2.74256	2.74252	2.7425	2.7425
10.93	4.77e-17	4.78e-17	4.79e-17	4.8e-17	4.8e-17	2.7376	2.73758	2.73754	2.73753	2.73752
10.94	4.77e-17	4.78e-17	4.79e-17	4.8e-17	4.8e-17	2.73262	2.7326	2.73256	2.73255	2.73254
10.95	4.77e-17	4.78e-17	4.79e-17	4.8e-17	4.8e-17	2.72765	2.72762	2.72758	2.72757	2.72756
10.96	4.77e-17	4.78e-17	4.79e-17	4.8e-17	4.8e-17	2.72267	2.72264	2.7226	2.72259	2.72258
10.97	4.77e-17	4.78e-17	4.79e-17	4.8e-17	4.8e-17	2.71769	2.71766	2.71763	2.71761	2.7176
10.98	4.77e-17	4.78e-17	4.79e-17	4.8e-17	4.8e-17	2.71271	2.71268	2.71265	2.71263	2.71262
10.99	4.77e-17	4.78e-17	4.79e-17	4.8e-17	4.8e-17	2.70773	2.7077	2.70767	2.70765	2.70764
11	4.77e-17	4.78e-17	4.79e-17	4.8e-17	4.8e-17	2.70275	2.70272	2.70269	2.70267	2.70266
11.01	4.77e-17	4.78e-17	4.79e-17	4.8e-17	4.8e-17	2.69777	2.69774	2.69771	2.69769	2.69768
11.02	4.77e-17	4.78e-17	4.79e-17	4.8e-17	4.8e-17	2.69279	2.69276	2.69273	2.69271	2.6927
11.03	4.77e-17	4.78e-17	4.79e-17	4.8e-17	4.8e-17	2.68781	2.68778	2.68775	2.68773	2.68772
11.04	4.77e-17	4.78e-17	4.79e-17	4.8e-17	4.8e-17	2.68283	2.6828	2.68277	2.68275	2.68274
11.05	4.77e-17	4.78e-17	4.79e-17	4.8e-17	4.8e-17	2.67785	2.67782	2.67779	2.67777	2.67776
11.06	4.77e-17	4.78e-17	4.79e-17	4.8e-17	4.8e-17	2.67287	2.67285	2.67281	2.67279	2.67278
11.07	4.77e-17	4.78e-17	4.79e-17	4.8e-17	4.8e-17	2.66789	2.66787	2.66783	2.66781	2.6678
11.08	4.77e-17	4.78e-17	4.79e-17	4.8e-17	4.8e-17	2.66291	2.66289	2.66285	2.66283	2.66283
11.09	4.77e-17	4.78e-17	4.79e-17	4.8e-17	4.8e-17	2.65793	2.65791	2.65787	2.65785	2.65785
11.1	4.77e-17	4.78e-17	4.79e-17	4.8e-17	4.8e-17	2.65295	2.65293	2.65289	2.65288	2.65287
11.11	4.77e-17	4.78e-17	4.79e-17	4.8e-17	4.8e-17	2.64797	2.64795	2.64791	2.6479	2.64789
11.12	4.77e-17	4.78e-17	4.79e-17	4.8e-17	4.8e-17	2.643	2.64297	2.64293	2.64292	2.64291
11.13	4.77e-17	4.78e-17	4.79e-17	4.8e-17	4.8e-17	2.63802	2.63799	2.63795	2.63794	2.63793
11.14	4.77e-17	4.78e-17	4.79e-17	4.8e-17	4.8e-17	2.63304	2.63301	2.63298	2.63296	2.63295
11.15	4.77e-17	4.78e-17	4.79e-17	4.8e-17	4.8e-17	2.62806	2.62803	2.628	2.62798	2.62797
11.16	4.77e-17	4.78e-17	4.79e-17	4.8e-17	4.8e-17	2.62308	2.62305	2.62302	2.623	2.62299
11.17	4.77e-17	4.78e-17	4.79e-17	4.8e-17	4.8e-17	2.6181	2.61807	2.61804	2.61802	2.61801
11.18	4.77e-17	4.78e-17	4.79e-17	4.8e-17	4.8e-17	2.61312	2.61309	2.61306	2.61304	2.61303
11.19	4.77e-17	4.78e-17	4.79e-17	4.8e-17	4.8e-17	2.60814	2.60811	2.60808	2.60806	2.60805
11.2	4.77e-17	4.78e-17	4.79e-17	4.8e-17	4.8e-17	2.60316	2.60313	2.6031	2.60308	2.60307
11.21	4.77e-17	4.78e-17	4.79e-17	4.8e-17	4.8e-17	2.59818	2.59815	2.59812	2.5981	2.59809
11.22	4.77e-17	4.78e-17	4.79e-17	4.8e-17	4.8e-17	2.5932	2.59318	2.59314	2.59312	2.59311
11.23	4.77e-17	4.78e-17	4.79e-17	4.8e-17	4.8e-17	2.58822	2.5882	2.58816	2.58814	2.58813
11.24	4.77e-17	4.78e-17	4.79e-17	4.8e-17	4.8e-17	2.58324	2.58322	2.58318	2.58316	2.58316
11.25	4.77e-17	4.78e-17	4.79e-17	4.8e-17	4.8e-17	2.57826	2.57824	2.5782	2.57818	2.57818
11.26	4.77e-17	4.78e-17	4.79e-17	4.8e-17	4.8e-17	2.57328	2.57326	2.57322	2.57321	2.5732
11.27	4.77e-17	4.78e-17	4.79e-17	4.8e-17	4.8e-17	2.5683	2.56828	2.56824	2.56823	2.56822
11.28	4.77e-17	4.78e-17	4.79e-17	4.8e-17	4.8e-17	2.56333	2.5633	2.56326	2.56325	2.56324
11.29	4.77e-17	4.78e-17	4.79e-17	4.8e-17	4.8e-17	2.55835	2.55832	2.55828	2.55827	2.55826
11.3	4.77e-17	4.78e-17	4.79e-17	4.8e-17	4.8e-17	2.55337	2.55334	2.55331	2.55329	2.55328
11.31	4.77e-17	4.78e-17	4.79e-17	4.8e-17	4.8e-17	2.54839	2.54836	2.54833	2.54831	2.5483
11.32	4.77e-17	4.78e-17	4.79e-17	4.8e-17	4.8e-17	2.54341	2.54338	2.54335	2.54333	2.54332
11.33	4.77e-17	4.78e-17	4.79e-17	4.8e-17	4.8e-17	2.53843	2.5384	2.53837	2.53835	2.53834
11.34	4.77e-17	4.78e-17	4.79e-17	4.8e-17	4.8e-17	2.53345	2.53342	2.53339	2.53337	2.53336
11.35	4.77e-17	4.78e-17	4.79e-17	4.8e-17	4.8e-17	2.52847	2.52844	2.52841	2.52839	2.52838
11.36	4.77e-17	4.78e-17	4.79e-17	4.8e-17	4.8e-17	2.52349	2.52346	2.52343	2.52341	2.5234
11.37	4.77e-17	4.78e-17	4.79e-17	4.8e-17	4.8e-17	2.51851	2.51848	2.51845	2.51843	2.51842
11.38	4.77e-17	4.78e-17	4.79e-17	4.8e-17	4.8e-17	2.51353	2.5135	2.51347	2.51345	2.51344
11.39	4.77e-17	4.78e-17	4.79e-17	4.8e-17	4.8e-17	2.50855	2.50853	2.50849	2.50847	2.50846
11.4	4.77e-17	4.78e-17	4.79e-17	4.8e-17	4.8e-17	2.50357	2.50355	2.50351	2.50349	2.50348
11.41	4.77e-17	4.78e-17	4.79e-17	4.8e-17	4.8e-17	2.49859	2.49857	2.49853	2.49851	2.49851
11.42	4.77e-17	4.78e-17	4.79e-17	4.8e-17	4.8e-17	2.49361	2.49359	2.49355	2.49353	2.49353
11.43	4.77e-17	4.78e-17	4.79e-17	4.8e-17	4.8e-17	2.48863	2.48861	2.48857	2.48856	2.48855
11.44	4.77e-17	4.78e-17	4.79e-17	4.8e-17	4.8e-17	2.48365	2.48363	2.48359	2.48358	2.48357
11.45	4.77e-17	4.78e-17	4.79e-17	4.8e-17	4.8e-17	2.47868	2.47865	2.47861	2.4786	2.47859
11.46	4.77e-17	4.78e-17	4.79e-17	4.8e-17	4.8e-17	2.4737	2.47367	2.47363	2.47362	2.47361
11.47	4.77e-17	4.78e-17	4.79e-17	4.8e-17	4.8e-17	2.46872	2.46869	2.46866	2.46864	2.46863
11.48	4.77e-17	4.78e-17	4.79e-17	4.8e-17	4.8e-17	2.46374	2.46371	2.46368	2.46366	2.46365
11.49	4.77e-17	4.78e-17	4.79e-17	4.8e-17	4.8e-17	2.45876	2.45873	2.4587	2.45868	2.45867
11.5	4.77e-17	4.78e-17	4.79e-17	4.8e-17	4.8e-17	2.45378	2.45375	2.45372	2.4537	2.45369
11.51	4.77e-17	4.78e-17	4.79e-17	4.8e-17	4.8e-17	2.4488	2.44877	2.44874	2.44872	2.44871
11.52	4.77e-17	4.78e-17	4.79e-17	4.8e-17	4.8e-17	2.44382	2.44379	2.44376	2.44374	2.44373
11.53	4.77e-17	4.78e-17	4.79e-17	4.8e-17	4.8e-17	2.43884	2.43881	2.43878	2.43876	2.43875
11.54	4.77e-17	4.78e-17	4.79e-17	4.8e-17	4.8e-17	2.43386	2.43383	2.4338	2.43378	2.43377
11.55	4.77e-17	4.78e-17	4.79e-17	4.8e-17	4.8e-17	2.42888	2.42886	2.42882	2.4288	2.42879
11.56	4.77e-17	4.78e-17	4.79e-17	4.8e-17	4.8e-17	2.4239	2.42388	2.42384	2.42382	2.42381
11.57	4.77e-17	4.78e-17	4.79e-17	4.8e-17	4.8e-17	2.41892	2.4189	2.41886	2.41884	2.41884
11.58	4.77e-17	4.78e-17	4.79e-17	4.8e-17	4.8e-17	2.41394	2.41392	2.41388	2.41386	2.41386
11.59	4.77e-17	4.78e-17	4.79e-17	4.8e-17	4.8e-17	2.40896	2.40894	2.4089	2.40889	2.40888
11.6	4.77e-17	4.78e-17	4.79e-17	4.8e-17	4.8e-17	2.40398	2.40396	2.40392	2.40391	2.4039
11.61	4.77e-17	4.78e-17	4.79e-17	4.8e-17	4.8e-17	2.39901	2.39898	2.39894	2.39893	2.39892
11.62	4.77e-17	4.78e-17	4.79e-17	4.8e-17	4.8e-17	2.39403	2.394	2.39396	2.39395	2.39394
11.63	4.77e-17	4.78e-17	4.79e-17	4.8e-17	4.8e-17	2.38905	2.38902	2.38899	2.38897	2.38896
11.64	4.77e-17	4.78e-17	4.79e-17	4.8e-17	4.8e-17	2.38407	2.38404	2.38401	2.38399	2.38398
11.65	4.77e-17	4.78e-17	4.79e-17	4.8e-17	4.8e-17	2.37909	2.37906	2.37903	2.37901	2.379
11.66	4.77e-17	4.78e-17	4.79e-17	4.8e-17	4.8e-17	2.37411	2.37408	2.37405	2.37403	2.37402
11.67	4.77e-17	4.78e-17	4.79e-17	4.8e-17	4.8e-17	2.36913	2.3691	2.36907	2.36905	2.36904
11.68	4.77e-17	4.78e-17	4.79e-17	4.8e-17	4.8e-17	2.36415	2.36412	2.36409	2.36407	2.36406
11.69	4.77e-17	4.78e-17	4.79e-17	4.8e-17	4.8e-17	2.35917	2.35914	2.35911	2.35909	2.35908
11.7	4.77e-17	4.78e-17	4.79e-17	4.8e-17	4.8e-17	2.35419	2.35416	2.35413	2.35411	2.3541
11.71	4.77e-17	4.78e-17	4.79e-17	4.8e-17	4.8e-17	2.34921	2.34918	2.34915	2.34913	2.34912
11.72	4.77e-17	4.78e-17	4.79e-17	4.8e-17	4.8e-17	2.34423	2.34421	2.34417	2.34415	2.34414
11.73	4.77e-17	4.78e-17	4.79e-17	4.8e-17	4.8e-17	2.33925	2.33923	2.33919	2.33917	2.33916
11.74	4.77e-17	4.78e-17	4.79e-17	4.8e-17	4.8e-17	2.33427	2.33425	2.33421	2.33419	2.33419
11.75	4.77e-17	4.78e-17	4.79e-17	4.8e-17	4.8e-17	2.32929	2.32927	2.32923	2.32921	2.32921
11.76	4.77e-17	4.78e-17	4.79e-17	4.8e-17	4.8e-17	2.32431	2.32429	2.32425	2.32424	2.32423
11.77	4.77e-17	4.78e-17	4.79e-17	4.8e-17	4.8e-17	2.31933	2.31931	2.31927	2.31926	2.31925
11.78	4.77e-17	4.78e-17	4.79e-17	4.8e-17	4.8e-17	2.31436	2.31433	2.31429	2.31428	2.31427
11.79	4.77e-17	4.78e-17	4.79e-17	4.8e-17	4.8e-17	2.30938	2.30935	2.30931	2.3093	2.30929
11.8	4.77e-17	4.78e-17	4.79e-17	4.8e-17	4.8e-17	2.3044	2.30437	2.30434	2.30432	2.30431
11.81	4.77e-17	4.78e-17	4.79e-17	4.8e-17	4.8e-17	2.29942	2.29939	2.29936	2.29934	2.29933
11.82	4.77e-17	4.78e-17	4.79e-17	4.8e-17	4.8e-17	2.29444	2.29441	2.29438	2.29436	2.29435
11.83	4.77e-17	4.78e-17	4.79e-17	4.8e-17	4.8e-17	2.28946	2.28943	2.2894	2.28938	2.28937
11.84	4.77e-17	4.78e-17	4.79e-17	4.8e-17	4.8e-17	2.28448	2.28445	2.28442	2.2844	2.28439
11.85	4.77e-17	4.78e-17	4.79e-17	4.8e-17	4.8e-17	2.2795	2.27947	2.27944	2.27942	2.27941
11.86	4.77e-17	4.78e-17	4.79e-17	4.8e-17	4.8e-17	2.27452	2.27449	2.27446	2.27444	2.27443
11.87	4.77e-17	4.78e-17	4.79e-17	4.8e-17	4.8e-17	2.26954	2.26951	2.26948	2.26946	2.26945
11.88	4.77e-17	4.78e-17	4.79e-17	4.8e-17	4.8e-17	2.26456	2.26454	2.2645	2.26448	2.26447
11.89	4.77e-17	4.78e-17	4.79e-17	4.8e-17	4.8e-17	2.25958	2.25956	2.25952	2.2595	2.25949
11.9	4.77e-17	4.78e-17	4.79e-17	4.8e-17	4.8e-17	2.2546	2.25458	2.25454	2.25452	2.25452
11.91	4.77e-17	4.78e-17	4.79e-17	4.8e-17	4.8e-17	2.24962	2.2496	2.24956	2.24954	2.24954
11.92	4.77e-17	4.78e-17	4.79e-17	4.8e-17	4.8e-17	2.24464	2.24462	2.24458	2.24457	2.24456
11.93	4.77e-17	4.78e-17	4.79e-17	4.8e-17	4.8e-17	2.23966	2.23964	2.2396	2.23959	2.23958
11.94	4.77e-17	4.78e-17	4.79e-17	4.8e-17	4.8e-17	2.23469	2.23466	2.23462	2.23461	2.2346
11.95	4.77e-17	4.78e-17	4.79e-17	4.8e-17	4.8e-17	2.22971	2.22968	2.22964	2.22963	2.22962
11.96	4.77e-17	4.78e-17	4.79e-17	4.8e-17	4.8e-17	2.22473	2.2247	2.22467	2.22465	2.22464
11.97	4.77e-17	4.78e-17	4.79e-17	4.8e-17	4.8e-17	2.21975	2.21972	2.21969	2.21967	2.21966
11.98	4.77e-17	4.78e-17	4.79e-17	4.8e-17	4.8e-17	2.21477	2.21474	2.21471	2.21469	2.21468
11.99	4.77e-17	4.78e-17	4.79e-17	4.8e-17	4.8e-17	2.20979	2.20976	2.20973	2.20971	2.2097
12	4.77e-17	4.78e-17	4.79e-17	4.8e-17	4.8e-17	2.20481	2.20478	2.20475	2.20473	2.20472
12.01	4.77e-17	4.78e-17	4.79e-17	4.8e-17	4.8e-17	2.19983	2.1998	2.19977	2.19975	2.19974
12.02	4.77e-17	4.78e-17	4.79e-17	4.8e-17	4.8e-17	2.19485	2.19482	2.19479	2.19477	2.19476
12.03	4.77e-17	4.78e-17	4.79e-17	4.8e-17	4.8e-17	2.18987	2.18984	2.18981	2.18979	2.18978
12.04	4.77e-17	4.78e-17	4.79e-17	4.8e-17	4.8e-17	2.18489	2.18486	2.18483	2.18481	2.1848
12.05	4.77e-17	4.78e-17	4.79e-17	4.8e-17	4.8e-17	2.17991	2.17989	2.17985	2.17983	2.17982
12.06	4.77e-17	4.78e-17	4.79e-17	4.8e-17	4.8e-17	2.17493	2.17491	2.17487	2.17485	2.17484
12.07	4.77e-17	4.78e-17	4.79e-17	4.8e-17	4.8e-17	2.16995	2.16993	2.16989	2.16987	2.16987
12.08	4.77e-17	4.78e-17	4.79e-17	4.8e-17	4.8e-17	2.16497	2.16495	2.16491	2.16489	2.16489
12.09	4.77e-17	4.78e-17	4.79e-17	4.8e-17	4.8e-17	2.15999	2.15997	2.15993	2.15992	2.15991
12.1	4.77e-17	4.78e-17	4.79e-17	4.8e-17	4.8e-17	2.15501	2.15499	2.15495	2.15494	2.15493
12.11	4.77e-17	4.78e-17	4.79e-17	4.8e-17	4.8e-17	2.15004	2.15001	2.14997	2.14996	2.14995
12.12	4.77e-17	4.78e-17	4.79e-17	4.8e-17	4.8e-17	2.14506	2.14503	2.14499	2.14498	2.14497
12.13	4.77e-17	4.78e-17	4.79e-17	4.8e-17	4.8e-17	2.14008	2.14005	2.14002	2.14	2.13999
12.14	4.77e-17	4.78e-17	4.79e-17	4.8e-17	4.8e-17	2.1351	2.13507	2.13504	2.13502	2.13501
12.15	4.77e-17	4.78e-17	4.79e-17	4.8e-17	4.8e-17	2.13012	2.13009	2.13006	2.13004	2.13003
12.16	4.77e-17	4.78e-17	4.79e-17	4.8e-17	4.8e-17	2.12514	2.12511	2.12508	2.12506	2.12505
12.17	4.77e-17	4.78e-17	4.79e-17	4.8e-17	4.8e-17	2.12016	2.12013	2.1201	2.12008	2.12007
12.18	4.77e-17	4.78e-17	4.79e-17	4.8e-17	4.8e-17	2.11518	2.11515	2.11512	2.1151	2.11509
12.19	4.77e-17	4.78e-17	4.79e-17	4.8e-17	4.8e-17	2.1102	2.11017	2.11014	2.11012	2.11011
12.2	4.77e-17	4.78e-17	4.79e-17	4.8e-17	4.8e-17	2.10522	2.10519	2.10516	2.10514	2.10513
12.21	4.77e-17	4.78e-17	4.79e-17	4.8e-17	4.8e-17	2.10024	2.10022	2.10018	2.10016	2.10015
12.22	4.77e-17	4.78e-17	4.79e-17	4.8e-17	4.8e-17	2.09526	2.09524	2.0952	2.09518	2.09517
12.23	4.77e-17	4.78e-17	4.79e-17	4.8e-17	4.8e-17	2.09028	2.09026	2.09022	2.0902	2.0902
12.24	4.77e-17	4.78e-17	4.79e-17	4.8e-17	4.8e-17	2.0853	2.08528	2.08524	2.08522	2.08522
12.25	4.77e-17	4.78e-17	4.79e-17	4.8e-17	4.8e-17	2.08032	2.0803	2.08026	2.08025	2.08024
12.26	4.77e-17	4.78e-17	4.79e-17	4.8e-17	4.8e-17	2.07534	2.07532	2.07528	2.07527	2.07526
12.27	4.77e-17	4.78e-17	4.79e-17	4.8e-17	4.8e-17	2.07037	2.07034	2.0703	2.07029	2.07028
12.28	4.77e-17	4.78e-17	4.79e-17	4.8e-17	4.8e-17	2.06539	2.06536	2.06532	2.06531	2.0653
12.29	4.77e-17	4.78e-17	4.79e-17	4.8e-17	4.8e-17	2.06041	2.06038	2.06035	2.06033	2.06032
12.3	4.77e-17	4.78e-17	4.79e-17	4.8e-17	4.8e-17	2.05543	2.0554	2.05537	2.05535	2.05534
12.31	4.77e-17	4.78e-17	4.79e-17	4.8e-17	4.8e-17	2.05045	2.05042	2.05039	2.05037	2.05036
12.32	4.77e-17	4.78e-17	4.79e-17	4.8e-17	4.8e-17	2.04547	2.04544	2.04541	2.04539	2.04538
12.33	4.77e-17	4.78e-17	4.79e-17	4.8e-17	4.8e-17	2.04049	2.04046	2.04043	2.04041	2.0404
12.34	4.77e-17	4.78e-17	4.79e-17	4.8e-17	4.8e-17	2.03551	2.03548	2.03545	2.03543	2.03542
12.35	4.77e-17	4.78e-17	4.79e-17	4.8e-17	4.8e-17	2.03053	2.0305	2.03047	2.03045	2.03044
12.36	4.77e-17	4.78e-17	4.79e-17	4.8e-17	4.8e-17	2.02555	2.02552	2.02549	2.02547	2.02546
12.37	4.77e-17	4.78e-17	4.79e-17	4.8e-17	4.8e-17	2.02057	2.02054	2.02051	2.02049	2.02048
12.38	4.77e-17	4.78e-17	4.79e-17	4.8e-17	4.8e-17	2.01559	2.01557	2.01553	2.01551	2.0155
12.39	4.77e-17	4.78e-17	4.79e-17	4.8e-17	4.8e-17	2.01061	2.01059	2.01055	2.01053	2.01052
12.4	4.77e-17	4.78e-17	4.79e-17	4.8e-17	4.8e-17	2.00563	2.00561	2.00557	2.00555	2.00555
12.41	4.77e-17	4.78e-17	4.79e-17	4.8e-17	4.8e-17	2.00065	2.00063	2.00059	2.00057	2.00057
12.42	4.77e-17	4.78e-17	4.79e-17	4.8e-17	4.8e-17	1.99567	1.99565	1.99561	1.9956	1.99559
12.43	4.77e-17	4.78e-17	4.79e-17	4.8e-17	4.8e-17	1.99069	1.99067	1.99063	1.99062	1.99061
12.44	4.77e-17	4.78e-17	4.79e-17	4.8e-17	4.8e-17	1.98572	1.98569	1.98565	1.98564	1.98563
12.45	4.77e-17	4.78e-17	4.79e-17	4.8e-17	4.8e-17	1.98074	1.98071	1.98067	1.98066	1.98065
12.46	4.77e-17	4.78e-17	4.79e-17	4.8e-17	4.8e-17	1.97576	1.97573	1.9757	1.97568	1.97567
12.47	4.77e-17	4.78e-17	4.79e-17	4.8e-17	4.8e-17	1.97078	1.97075	1.97072	1.9707	1.97069
12.48	4.77e-17	4.78e-17	4.79e-17	4.8e-17	4.8e-17	1.9658	1.96577	1.96574	1.96572	1.96571
12.49	4.77e-17	4.78e-17	4.79e-17	4.8e-17	4.8e-17	1.96082	1.96079	1.96076	1.96074	1.96073
12.5	4.77e-17	4.78e-17	4.79e-17	4.8e-17	4.8e-17	1.95584	1.95581	1.95578	1.95576	1.95575
12.51	4.77e-17	4.78e-17	4.79e-17	4.8e-17	4.8e-17	1.95086	1.95083	1.9508	1.95078	1.95077
12.52	4.77e-17	4.78e-17	4.79e-17	4.8e-17	4.8e-17	1.94588	1.94585	1.94582	1.9458	1.94579
12.53	4.77e-17	4.78e-17	4.79e-17	4.8e-17	4.8e-17	1.9409	1.94087	1.94084	1.94082	1.94081
12.54	4.77e-17	4.78e-17	4.79e-17	4.8e-17	4.8e-17	1.93592	1.9359	1.93586	1.93584	1.93583
12.55	4.77e-17	4.78e-17	4.79e-17	4.8e-17	4.8e-17	1.93094	1.93092	1.93088	1.93086	1.93085
12.56	4.77e-17	4.78e-17	4.79e-17	4.8e-17	4.8e-17	1.92596	1.92594	1.9259	1.92588	1.92588
12.57	4.77e-17	4.78e-17	4.79e-17	4.8e-17	4.8e-17	1.92098	1.92096	1.92092	1.9209	1.9209
12.58	4.77e-17	4.78e-17	4.79e-17	4.8e-17	4.8e-17	1.916	1.91598	1.91594	1.91593	1.91592
12.59	4.77e-17	4.78e-17	4.79e-17	4.8e-17	4.8e-17	1.91102	1.911	1.91096	1.91095	1.91094
12.6	4.77e-17	4.78e-17	4.79e-17	4.8e-17	4.8e-17	1.90605	1.90602	1.90598	1.90597	1.90596
12.61	4.77e-17	4.78e-17	4.79e-17	4.8e-17	4.8e-17	1.90107	1.90104	1.901	1.90099	1.90098
12.62	4.77e-17	4.78e-17	4.79e-17	4.8e-17	4.8e-17	1.89609	1.89606	1.89603	1.89601	1.896
12.63	4.77e-17	4.78e-17	4.79e-17	4.8e-17	4.8e-17	1.89111	1.89108	1.89105	1.89103	1.89102
12.64	4.77e-17	4.78e-17	4.79e-17	4.8e-17	4.8e-17	1.88613	1.8861	1.88607	1.88605	1.88604
12.65	4.77e-17	4.78e-17	4.79e-17	4.8e-17	4.8e-17	1.88115	1.88112	1.88109	1.88107	1.88106
12.66	4.77e-17	4.78e-17	4.79e-17	4.8e-17	4.8e-17	1.87617	1.87614	1.87611	1.87609	1.87608
12.67	4.77e-17	4.78e-17	4.79e-17	4.8e-17	4.8e-17	1.87119	1.87116	1.87113	1.87111	1.8711
12.68	4.77e-17	4.78e-17	4.79e-17	4.8e-17	4.8e-17	1.86621	1.86618	1.86615	1.86613	1.86612
12.69	4.77e-17	4.78e-17	4.79e-17	4.8e-17	4.8e-17	1.86123	1.8612	1.86117	1.86115	1.86114
12.7	4.77e-17	4.78e-17	4.79e-17	4.8e-17	4.8e-17	1.85625	1.85622	1.85619	1.85617	1.85616
12.71	4.77e-17	4.78e-17	4.79e-17	4.8e-17	4.8e-17	1.85127	1.85125	1.85121	1.85119	1.85118
12.72	4.77e-17	4.78e-17	4.79e-17	4.8e-17	4.8e-17	1.84629	1.84627	1.84623	1.84621	1.8462
12.73	4.77e-17	4.78e-17	4.79e-17	4.8e-17	4.8e-17	1.84131	1.84129	1.84125	1.84123	1.84123
12.74	4.77e-17	4.78e-17	4.79e-17	4.8e-17	4.8e-17	1.83633	1.83631	1.83627	1.83625	1.83625
12.75	4.77e-17	4.78e-17	4.79e-17	4.8e-17	4.8e-17	1.83135	1.83133	1.83129	1.83128	1.83127
12.76	4.77e-17	4.78e-17	4.79e-17	4.8e-17	4.8e-17	1.82637	1.82635	1.82631	1.8263	1.82629
12.77	4.77e-17	4.78e-17	4.79e-17	4.8e-17	4.8e-17	1.8214	1.82137	1.82133	1.82132	1.82131
12.78	4.77e-17	4.78e-17	4.79e-17	4.8e-17	4.8e-17	1.81642	1.81639	1.81635	1.81634	1.81633
12.79	4.77e-17	4.78e-17	4.79e-17	4.8e-17	4.8e-17	1.81144	1.81141	1.81138	1.81136	1.81135
12.8	4.77e-17	4.78e-17	4.79e-17	4.8e-17	4.8e-17	1.80646	1.80643	1.8064	1.80638	1.80637
12.81	4.77e-17	4.78e-17	4.79e-17	4.8e-17	4.8e-17	1.80148	1.80145	1.80142	1.8014	1.80139
12.82	4.77e-17	4.78e-17	4.79e-17	4.8e-17	4.8e-17	1.7965	1.79647	1.79644	1.79642	1.79641
12.83	4.77e-17	4.78e-17	4.79e-17	4.8e-17	4.8e-17	1.79152	1.79149	1.79146	1.79144	1.79143
12.84	4.77e-17	4.78e-17	4.79e-17	4.8e-17	4.8e-17	1.78654	1.78651	1.78648	1.78646	1.78645
12.85	4.77e-17	4.78e-17	4.79e-17	4.8e-17	4.8e-17	1.78156	1.78153	1.7815	1.78148	1.78147
12.86	4.77e-17	4.78e-17	4.79e-17	4.8e-17	4.8e-17	1.77658	1.77655	1.77652	1.7765	1.77649
12.87	4.77e-17	4.78e-17	4.79e-17	4.8e-17	4.8e-17	1.7716	1.77158	1.77154	1.77152	1.77151
12.88	4.77e-17	4.78e-17	4.79e-17	4.8e-17	4.8e-17	1.76662	1.7666	1.76656	1.76654	1.76653
12.89	4.77e-17	4.78e-17	4.79e-17	4.8e-17	4.8e-17	1.76164	1.76162	1.76158	1.76156	1.76156
12.9	4.77e-17	4.78e-17	4.79e-17	4.8e-17	4.8e-17	1.75666	1.75664	1.7566	1.75658	1.75658
12.91	4.77e-17	4.78e-17	4.79e-17	4.8e-17	4.8e-17	1.75168	1.75166	1.75162	1.75161	1.7516
12.92	4.77e-17	4.78e-17	4.79e-17	4.8e-17	4.8e-17	1.7467	1.74668	1.74664	1.74663	1.74662
12.93	4.77e-17	4.78e-17	4.79e-17	4.8e-17	4.8e-17	1.74173	1.7417	1.74166	1.74165	1.74164
12.94	4.77e-17	4.78e-17	4.79e-17	4.8e-17	4.8e-17	1.73675	1.73672	1.73668	1.73667	1.73666
12.95	4.77e-17	4.78e-17	4.79e-17	4.8e-17	4.8e-17	1.73177	1.73174	1.73171	1.73169	1.73168
12.96	4.77e-17	4.78e-17	4.79e-17	4.8e-17	4.8e-17	1.72679	1.72676	1.72673	1.72671	1.7267
12.97	4.77e-17	4.78e-17	4.79e-17	4.8e-17	4.8e-17	1.72181	1.72178	1.72175	1.72173	1.72172
12.98	4.77e-17	4.78e-17	4.79e-17	4.8e-17	4.8e-17	1.71683	1.7168	1.71677	1.71675	1.71674
12.99	4.77e-17	4.78e-17	4.79e-17	4.8e-17	4.8e-17	1.71185	1.71182	1.71179	1.71177	1.71176
13	4.77e-17	4.78e-17	4.79e-17	4.8e-17	4.8e-17	1.70687	1.70684	1.70681	1.70679	1.70678
13.01	4.77e-17	4.78e-17	4.79e-17	4.8e-17	4.8e-17	1.70189	1.70186	1.70183	1.70181	1.7018
13.02	4.77e-17	4.78e-17	4.79e-17	4.8e-17	4.8e-17	1.69691	1.69688	1.69685	1.69683	1.69682
13.03	4.77e-17	4.78e-17	4.79e-17	4.8e-17	4.8e-17	1.69193	1.6919	1.69187	1.69185	1.69184
13.04	4.77e-17	4.78e-17	4.79e-17	4.8e-17	4.8e-17	1.68695	1.68693	1.68689	1.68687	1.68686
13.05	4.77e-17	4.78e-17	4.79e-17	4.8e-17	4.8e-17	1.68197	1.68195	1.68191	1.68189	1.68188
13.06	4.77e-17	4.78e-17	4.79e-17	4.8e-17	4.8e-17	1.67699	1.67697	1.67693	1.67691	1.67691
13.07	4.77e-17	4.78e-17	4.79e-17	4.8e-17	4.8e-17	1.67201	1.67199	1.67195	1.67193	1.67193
13.08	4.77e-17	4.78e-17	4.79e-17	4.8e-17	4.8e-17	1.66703	1.66701	1.66697	1.66696	1.66695
13.09	4.77e-17	4.78e-17	4.79e-17	4.8e-17	4.8e-17	1.66205	1.66203	1.66199	1.66198	1.66197
13.1	4.77e-17	4.78e-17	4.79e-17	4.8e-17	4.8e-17	1.65708	1.65705	1.65701	1.657	1.65699
13.11	4.77e-17	4.78e-17	4.79e-17	4.8e-17	4.8e-17	1.6521	1.65207	1.65203	1.65202	1.65201
13.12	4.77e-17	4.78e-17	4.79e-17	4.8e-17	4.8e-17	1.64712	1.64709	1.64706	1.64704	1.64703
13.13	4.77e-17	4.78e-17	4.79e-17	4.8e-17	4.8e-17	1.64214	1.64211	1.64208	1.64206	1.64205
13.14	4.77e-17	4.78e-17	4.79e-17	4.8e-17	4.8e-17	1.63716	1.63713	1.6371	1.63708	1.63707
13.15	4.77e-17	4.78e-17	4.79e-17	4.8e-17	4.8e-17	1.63218	1.63215	1.63212	1.6321	1.63209
13.16	4.77e-17	4.78e-17	4.79e-17	4.8e-17	4.8e-17	1.6272	1.62717	1.62714	1.62712	1.62711
13.17	4.77e-17	4.78e-17	4.79e-17	4.8e-17	4.8e-17	1.62222	1.62219	1.62216	1.62214	1.62213
13.18	4.77e-17	4.78e-17	4.79e-17	4.8e-17	4.8e-17	1.61724	1.61721	1.61718	1.61716	1.61715
13.19	4.77e-17	4.78e-17	4.79e-17	4.8e-17	4.8e-17	1.61226	1.61223	1.6122	1.61218	1.61217
13.2	4.77e-17	4.78e-17	4.79e-17	4.8e-17	4.8e-17	1.60728	1.60726	1.60722	1.6072	1.60719
13.21	4.77e-17	4.78e-17	4.79e-17	4.8e-17	4.8e-17	1.6023	1.60228	1.60224	1.60222	1.60221
13.22	4.77e-17	4.78e-17	4.79e-17	4.8e-17	4.8e-17	1.59732	1.5973	1.59726	1.59724	1.59724
13.23	4.77e-17	4.78e-17	4.79e-17	4.8e-17	4.8e-17	1.59234	1.59232	1.59228	1.59226	1.59226
13.24	4.77e-17	4.78e-17	4.79e-17	4.8e-17	4.8e-17	1.58736	1.58734	1.5873	1.58729	1.58728
13.25	4.77e-17	4.78e-17	4.79e-17	4.8e-17	4.8e-17	1.58238	1.58236	1.58232	1.58231	1.5823
13.26	4.77e-17	4.78e-17	4.79e-17	4.8e-17	4.8e-17	1.57741	1.57738	1.57734	1.57733	1.57732
13.27	4.77e-17	4.78e-17	4.79e-17	4.8e-17	4.8e-17	1.57243	1.5724	1.57236	1.57235	1.57234
13.28	4.77e-17	4.78e-17	4.79e-17	4.8e-17	4.8e-17	1.56745	1.56742	1.56739	1.56737	1.56736
13.29	4.77e-17	4.78e-17	4.79e-17	4.8e-17	4.8e-17	1.56247	1.56244	1.56241	1.56239	1.56238
13.3	4.77e-17	4.78e-17	4.79e-17	4.8e-17	4.8e-17	1.55749	1.55746	1.55743	1.55741	1.5574
13.31	4.77e-17	4.78e-17	4.79e-17	4.8e-17	4.8e-17	1.55251	1.55248	1.55245	1.55243	1.55242
13.32	4.77e-17	4.78e-17	4.79e-17	4.8e-17	4.8e-17	1.54753	1.5475	1.54747	1.54745	1.54744
13.33	4.77e-17	4.78e-17	4.79e-17	4.8e-17	4.8e-17	1.54255	1.54252	1.54249	1.54247	1.54246
13.34	4.77e-17	4.78e-17	4.79e-17	4.8e-17	4.8e-17	1.53757	1.53754	1.53751	1.53749	1.53748
13.35	4.77e-17	4.78e-17	4.79e-17	4.8e-17	4.8e-17	1.53259	1.53256	1.53253	1.53251	1.5325
13.36	4.77e-17	4.78e-17	4.79e-17	4.8e-17	4.8e-17	1.52761	1.52758	1.52755	1.52753	1.52752
13.37	4.77e-17	4.78e-17	4.79e-17	4.8e-17	4.8e-17	1.52263	1.52261	1.52257	1.52255	1.52254
13.38	4.77e-17	4.78e-17	4.79e-17	4.8e-17	4.8e-17	1.51765	1.51763	1.51759	1.51757	1.51756
13.39	4.77e-17	4.78e-17	4.79e-17	4.8e-17	4.8e-17	1.51267	1.51265	1.51261	1.51259	1.51259
13.4	4.77e-17	4.78e-17	4.79e-17	4.8e-17	4.8e-17	1.50769	1.50767	1.50763	1.50761	1.50761
13.41	4.77e-17	4.78e-17	4.79e-17	4.8e-17	4.8e-17	1.50271	1.50269	1.50265	1.50264	1.50263
13.42	4.77e-17	4.78e-17	4.79e-17	4.8e-17	4.8e-17	1.49773	1.49771	1.49767	1.49766	1.49765
13.43	4.77e-17	4.78e-17	4.79e-17	4.8e-17	4.8e-17	1.49276	1.49273	1.49269	1.49268	1.49267
13.44	4.77e-17	4.78e-17	4.79e-17	4.8e-17	4.8e-17	1.48778	1.48775	1.48771	1.4877	1.48769
13.45	4.77e-17	4.78e-17	4.79e-17	4.8e-17	4.8e-17	1.4828	1.48277	1.48274	1.48272	1.48271
13.46	4.77e-17	4.78e-17	4.79e-17	4.8e-17	4.8e-17	1.47782	1.47779	1.47776	1.47774	1.47773
13.47	4.77e-17	4.78e-17	4.79e-17	4.8e-17	4.8e-17	1.47284	1.47281	1.47278	1.47276	1.47275
13.48	4.77e-17	4.78e-17	4.79e-17	4.8e-17	4.8e-17	1.46786	1.46783	1.4678	1.46778	1.46777
13.49	4.77e-17	4.78e-17	4.79e-17	4.8e-17	4.8e-17	1.46288	1.46285	1.46282	1.4628	1.46279
13.5	4.77e-17	4.78e-17	4.79e-17	4.8e-17	4.8e-17	1.4579	1.45787	1.45784	1.45782	1.45781
13.51	4.77e-17	4.78e-17	4.79e-17	4.8e-17	4.8e-17	1.45292	1.45289	1.45286	1.45284	1.45283
13.52	4.77e-17	4.78e-17	4.79e-17	4.8e-17	4.8e-17	1.44794	1.44791	1.44788	1.44786	1.44785
13.53	4.77e-17	4.78e-17	4.79e-17	4.8e-17	4.8e-17	1.44296	1.44294	1.4429	1.44288	1.44287
13.54	4.77e-17	4.78e-17	4.79e-17	4.8e-17	4.8e-17	1.43798	1.43796	1.43792	1.4379	1.43789
13.55	4.77e-17	4.78e-17	4.79e-17	4.8e-17	4.8e-17	1.433	1.43298	1.43294	1.43292	1.43292
13.56	4.77e-17	4.78e-17	4.79e-17	4.8e-17	4.8e-17	1.42802	1.428	1.42796	1.42794	1.42794
13.57	4.77e-17	4.78e-17	4.79e-17	4.8e-17	4.8e-17	1.42304	1.42302	1.42298	1.42297	1.42296
13.58	4.77e-17	4.78e-17	4.79e-17	4.8e-17	4.8e-17	1.41806	1.41804	1.418	1.41799	1.41798
13.59	4.77e-17	4.78e-17	4.79e-17	4.8e-17	4.8e-17	1.41309	1.41306	1.41302	1.41301	1.413
13.6	4.77e-17	4.78e-17	4.79e-17	4.8e-17	4.8e-17	1.40811	1.40808	1.40804	1.40803	1.40802
13.61	4.77e-17	4.78e-17	4.79e-17	4.8e-17	4.8e-17	1.40313	1.4031	1.40307	1.40305	1.40304
13.62	4.77e-17	4.78e-17	4.79e-17	4.8e-17	4.8e-17	1.39815	1.39812	1.39809	1.39807	1.39806
13.63	4.77e-17	4.78e-17	4.79e-17	4.8e-17	4.8e-17	1.39317	1.39314	1.39311	1.39309	1.39308
13.64	4.77e-17	4.78e-17	4.79e-17	4.8e-17	4.8e-17	1.38819	1.38816	1.38813	1.38811	1.3881
13.65	4.77e-17	4.78e-17	4.79e-17	4.8e-17	4.8e-17	1.38321	1.38318	1.38315	1.38313	1.38312
13.66	4.77e-17	4.78e-17	4.79e-17	4.8e-17	4.8e-17	1.37823	1.3782	1.37817	1.37815	1.37814
13.67	4.77e-17	4.78e-17	4.79e-17	4.8e-17	4.8e-17	1.37325	1.37322	1.37319	1.37317	1.37316
13.68	4.77e-17	4.78e-17	4.79e-17	4.8e-17	4.8e-17	1.36827	1.36824	1.36821	1.36819	1.36818
13.69	4.77e-17	4.78e-17	4.79e-17	4.8e-17	4.8e-17	1.36329	1.36326	1.36323	1.36321	1.3632
13.7	4.77e-17	4.78e-17	4.79e-17	4.8e-17	4.8e-17	1.35831	1.35829	1.35825	1.35823	1.35822
13.71	4.77e-17	4.78e-17	4.79e-17	4.8e-17	4.8e-17	1.35333	1.35331	1.35327	1.35325	1.35324
13.72	4.77e-17	4.78e-17	4.79e-17	4.8e-17	4.8e-17	1.34835	1.34833	1.34829	1.34827	1.34827
13.73	4.77e-17	4.78e-17	4.79e-17	4.8e-17	4.8e-17	1.34337	1.34335	1.34331	1.34329	1.34329
13.74	4.77e-17	4.78e-17	4.79e-17	4.8e-17	4.8e-17	1.33839	1.33837	1.33833	1.33832	1.33831
13.75	4.77e-17	4.78e-17	4.79e-17	4.8e-17	4.8e-17	1.33341	1.33339	1.33335	1.33334	1.33333
13.76	4.77e-17	4.78e-17	4.79e-17	4.8e-17	4.8e-17	1.32844	1.32841	1.32837	1.32836	1.32835
13.77	4.77e-17	4.78e-17	4.79e-17	4.8e-17	4.8e-17	1.32346	1.32343	1.32339	1.32338	1.32337
13.78	4.77e-17	4.78e-17	4.79e-17	4.8e-17	4.8e-17	1.31848	1.31845	1.31842	1.3184	1.31839
13.79	4.77e-17	4.78e-17	4.79e-17	4.8e-17	4.8e-17	1.3135	1.31347	1.31344	1.31342	1.31341
13.8	4.77e-17	4.78e-17	4.79e-17	4.8e-17	4.8e-17	1.30852	1.30849	1.30846	1.30844	1.30843
13.81	4.77e-17	4.78e-17	4.79e-17	4.8e-17	4.8e-17	1.30354	1.30351	1.30348	1.30346	1.30345
13.82	4.77e-17	4.78e-17	4.79e-17	4.8e-17	4.8e-17	1.29856	1.29853	1.2985	1.29848	1.29847
13.83	4.77e-17	4.78e-17	4.79e-17	4.8e-17	4.8e-17	1.29358	1.29355	1.29352	1.2935	1.29349
13.84	4.77e-17	4.78e-17	4.79e-17	4.8e-17	4.8e-17	1.2886	1.28857	1.28854	1.28852	1.28851
13.85	4.77e-17	4.78e-17	4.79e-17	4.8e-17	4.8e-17	1.28362	1.28359	1.28356	1.28354	1.28353
13.86	4.77e-17	4.78e-17	4.79e-17	4.8e-17	4.8e-17	1.27864	1.27862	1.27858	1.27856	1.27855
13.87	4.77e-17	4.78e-17	4.79e-17	4.8e-17	4.8e-17	1.27366	1.27364	1.2736	1.27358	1.27357
13.88	4.77e-17	4.78e-17	4.79e-17	4.8e-17	4.8e-17	1.26868	1.26866	1.26862	1.2686	1.2686
13.89	4.77e-17	4.78e-17	4.79e-17	4.8e-17	4.8e-17	1.2637	1.26368	1.26364	1.26362	1.26362
13.9	4.77e-17	4.78e-17	4.79e-17	4.8e-17	4.8e-17	1.25872	1.2587	1.25866	1.25865	1.25864
13.91	4.77e-17	4.78e-17	4.79e-17	4.8e-17	4.8e-17	1.25374	1.25372	1.25368	1.25367	1.25366
13.92	4.77e-17	4.78e-17	4.79e-17	4.8e-17	4.8e-17	1.24877	1.24874	1.2487	1.24869	1.24868
13.93	4.77e-17	4.78e-17	4.79e-17	4.8e-17	4.8e-17	1.24379	1.24376	1.24372	1.24371	1.2437
13.94	4.77e-17	4.78e-17	4.79e-17	4.8e-17	4.8e-17	1.23881	1.23878	1.23875	1.23873	1.23872
13.95	4.77e-17	4.78e-17	4.79e-17	4.8e-17	4.8e-17	1.23383	1.2338	1.23377	1.23375	1.23374
13.96	4.77e-17	4.78e-17	4.79e-17	4.8e-17	4.8e-17	1.22885	1.22882	1.22879	1.22877	1.22876
13.97	4.77e-17	4.78e-17	4.79e-17	4.8e-17	4.8e-17	1.22387	1.22384	1.22381	1.22379	1.22378
13.98	4.77e-17	4.78e-17	4.79e-17	4.8e-17	4.8e-17	1.21889	1.21886	1.21883	1.21881	1.2188
13.99	4.77e-17	4.78e-17	4.79e-17	4.8e-17	4.8e-17	1.21391	1.21388	1.21385	1.21383	1.21382
14	4.77e-17	4.78e-17	4.79e-17	4.8e-17	4.8e-17	1.20893	1.2089	1.20887	1.20885	1.20884
14.01	4.77e-17	4.78e-17	4.79e-17	4.8e-17	4.8e-17	1.20395	1.20392	1.20389	1.20387	1.20386
14.02	4.77e-17	4.78e-17	4.79e-17	4.8e-17	4.8e-17	1.19897	1.19894	1.19891	1.19889	1.19888
14.03	4.77e-17	4.78e-17	4.79e-17	4.8e-17	4.8e-17	1.19399	1.19397	1.19393	1.19391	1.1939
14.04	4.77e-17	4.78e-17	4.79e-17	4.8e-17	4.8e-17	1.18901	1.18899	1.18895	1.18893	1.18892
14.05	4.77e-17	4.78e-17	4.79e-17	4.8e-17	4.8e-17	1.18403	1.18401	1.18397	1.18395	1.18395
14.06	4.77e-17	4.78e-17	4.79e-17	4.8e-17	4.8e-17	1.17905	1.17903	1.17899	1.17897	1.17897
14.07	4.77e-17	4.78e-17	4.79e-17	4.8e-17	4.8e-17	1.17407	1.17405	1.17401	1.174	1.17399
14.08	4.77e-17	4.78e-17	4.79e-17	4.8e-17	4.8e-17	1.16909	1.16907	1.16903	1.16902	1.16901
14.09	4.77e-17	4.78e-17	4.79e-17	4.8e-17	4.8e-17	1.16412	1.16409	1.16405	1.16404	1.16403
14.1	4.77e-17	4.78e-17	4.79e-17	4.8e-17	4.8e-17	1.15914	1.15911	1.15907	1.15906	1.15905
14.11	4.77e-17	4.78e-17	4.79e-17	4.8e-17	4.8e-17	1.15416	1.15413	1.1541	1.15408	1.15407
14.12	4.77e-17	4.78e-17	4.79e-17	4.8e-17	4.8e-17	1.14918	1.14915	1.14912	1.1491	1.14909
14.13	4.77e-17	4.78e-17	4.79e-17	4.8e-17	4.8e-17	1.1442	1.14417	1.14414	1.14412	1.14411
14.14	4.77e-17	4.78e-17	4.79e-17	4.8e-17	4.8e-17	1.13922	1.13919	1.13916	1.13914	1.13913
14.15	4.77e-17	4.78e-17	4.79e-17	4.8e-17	4.8e-17	1.13424	1.13421	1.13418	1.13416	1.13415
14.16	4.77e-17	4.78e-17	4.79e-17	4.8e-17	4.8e-17	1.12926	1.12923	1.1292	1.12918	1.12917
14.17	4.77e-17	4.78e-17	4.79e-17	4.8e-17	4.8e-17	1.12428	1.12425	1.12422	1.1242	1.12419
14.18	4.77e-17	4.78e-17	4.79e-17	4.8e-17	4.8e-17	1.1193	1.11927	1.11924	1.11922	1.11921
14.19	4.77e-17	4.78e-17	4.79e-17	4.8e-17	4.8e-17	1.11432	1.1143	1.11426	1.11424	1.11423
14.2	4.77e-17	4.78e-17	4.79e-17	4.8e-17	4.8e-17	1.10934	1.10932	1.10928	1.10926	1.10925
14.21	4.77e-17	4.78e-17	4.79e-17	4.8e-17	4.8e-17	1.10436	1.10434	1.1043	1.10428	1.10428
14.22	4.77e-17	4.78e-17	4.79e-17	4.8e-17	4.8e-17	1.09938	1.09936	1.09932	1.0993	1.0993
14.23	4.77e-17	4.78e-17	4.79e-17	4.8e-17	4.8e-17	1.0944	1.09438	1.09434	1.09433	1.09432
14.24	4.77e-17	4.78e-17	4.79e-17	4.8e-17	4.8e-17	1.08942	1.0894	1.08936	1.08935	1.08934
14.25	4.77e-17	4.78e-17	4.79e-17	4.8e-17	4.8e-17	1.08445	1.08442	1.08438	1.08437	1.08436
14.26	4.77e-17	4.78e-17	4.79e-17	4.8e-17	4.8e-17	1.07947	1.07944	1.0794	1.07939	1.07938
14.27	4.77e-17	4.78e-17	4.79e-17	4.8e-17	4.8e-17	1.07449	1.07446	1.07443	1.07441	1.0744
14.28	4.77e-17	4.78e-17	4.79e-17	4.8e-17	4.8e-17	1.06951	1.06948	1.06945	1.06943	1.06942
14.29	4.77e-17	4.78e-17	4.79e-17	4.8e-17	4.8e-17	1.06453	1.0645	1.06447	1.06445	1.06444
14.3	4.77e-17	4.78e-17	4.79e-17	4.8e-17	4.8e-17	1.05955	1.05952	1.05949	1.05947	1.05946
14.31	4.77e-17	4.78e-17	4.79e-17	4.8e-17	4.8e-17	1.05457	1.05454	1.05451	1.05449	1.05448
14.32	4.77e-17	4.78e-17	4.79e-17	4.8e-17	4.8e-17	1.04959	1.04956	1.04953	1.04951	1.0495
14.33	4.77e-17	4.78e-17	4.79e-17	4.8e-17	4.8e-17	1.04461	1.04458	1.04455	1.04453	1.04452
14.34	4.77e-17	4.78e-17	4.79e-17	4.8e-17	4.8e-17	1.03963	1.0396	1.03957	1.03955	1.03954
14.35	4.77e-17	4.78e-17	4.79e-17	4.8e-17	4.8e-17	1.03465	1.03462	1.03459	1.03457	1.03456
14.36	4.77e-17	4.78e-17	4.79e-17	4.8e-17	4.8e-17	1.02967	1.02965	1.02961	1.02959	1.02958
14.37	4.77e-17	4.78e-17	4.79e-17	4.8e-17	4.8e-17	1.02469	1.02467	1.02463	1.02461	1.0246
14.38	4.77e-17	4.78e-17	4.79e-17	4.8e-17	4.8e-17	1.01971	1.01969	1.01965	1.01963	1.01963
14.39	4.77e-17	4.78e-17	4.79e-17	4.8e-17	4.8e-17	1.01473	1.01471	1.01467	1.01465	1.01465
14.4	4.77e-17	4.78e-17	4.79e-17	4.8e-17	4.8e-17	1.00975	1.00973	1.00969	1.00968	1.00967
14.41	4.77e-17	4.78e-17	4.79e-17	4.8e-17	4.8e-17	1.00477	1.00475	1.00471	1.0047	1.00469
14.42	4.77e-17	4.78e-17	4.79e-17	4.8e-17	4.8e-17	0.999795	0.999769	0.999734	0.999717	0.999708
14.43	4.77e-17	4.78e-17	4.79e-17	4.8e-17	4.8e-17	0.994816	0.99479	0.994755	0.994737	0.994729
14.44	4.77e-17	4.78e-17	4.79e-17	4.8e-17	4.8e-17	0.989837	0.98981	0.989775	0.989758	0.989749
14.45	4.77e-17	4.78e-17	4.79e-17	4.8e-17	4.8e-17	0.984857	0.984831	0.984796	0.984779	0.98477
14.46	4.77e-17	4.78e-17	4.79e-17	4.8e-17	4.8e-17	0.979878	0.979852	0.979817	0.979799	0.97979
14.47	4.77e-17	4.78e-17	4.79e-17	4.8e-17	4.8e-17	0.974898	0.974872	0.974837	0.97482	0.974811
14.48	4.77e-17	4.78e-17	4.79e-17	4.8e-17	4.8e-17	0.969919	0.969893	0.969858	0.96984	0.969832
14.49	4.77e-17	4.78e-17	4.79e-17	4.8e-17	4.8e-17	0.96494	0.964913	0.964878	0.964861	0.964852
14.5	4.77e-17	4.78e-17	4.79e-17	4.8e-17	4.8e-17	0.95996	0.959934	0.959899	0.959882	0.959873
14.51	4.77e-17	4.78e-17	4.79e-17	4.8e-17	4.8e-17	0.954981	0.954955	0.95492	0.954902	0.954893
14.52	4.77e-17	4.78e-17	4.79e-17	4.8e-17	4.8e-17	0.950001	0.949975	0.94994	0.949923	0.949914
14.53	4.77e-17	4.78e-17	4.79e-17	4.8e-17	4.8e-17	0.945022	0.944996	0.944961	0.944943	0.944935
14.54	4.77e-17	4.78e-17	4.79e-17	4.8e-17	4.8e-17	0.940043	0.940016	0.939981	0.939964	0.939955
14.55	4.77e-17	4.78e-17	4.79e-17	4.8e-17	4.8e-17	0.935063	0.935037	0.935002	0.934985	0.934976
14.56	4.77e-17	4.78e-17	4.79e-17	4.8e-17	4.8e-17	0.930084	0.930058	0.930023	0.930005	0.929996
14.57	4.77e-17	4.78e-17	4.79e-17	4.8e-17	4.8e-17	0.925104	0.925078	0.925043	0.925026	0.925017
14.58	4.77e-17	4.78e-17	4.79e-17	4.8e-17	4.8e-17	0.920125	0.920099	0.920064	0.920046	0.920038
14.59	4.77e-17	4.78e-17	4.79e-17	4.8e-17	4.8e-17	0.915146	0.915119	0.915084	0.915067	0.915058
14.6	4.77e-17	4.78e-17	4.79e-17	4.8e-17	4.8e-17	0.910166	0.91014	0.910105	0.910088	0.910079
14.61	4.77e-17	4.78e-17	4.79e-17	4.8e-17	4.8e-17	0.905187	0.905161	0.905126	0.905108	0.905099
14.62	4.77e-17	4.78e-17	4.79e-17	4.8e-17	4.8e-17	0.900207	0.900181	0.900146	0.900129	0.90012
14.63	4.77e-17	4.78e-17	4.79e-17	4.8e-17	4.8e-17	0.895228	0.895202	0.895167	0.895149	0.895141
14.64	4.77e-17	4.78e-17	4.79e-17	4.8e-17	4.8e-17	0.890249	0.890222	0.890188	0.89017	0.890161
14.65	4.77e-17	4.78e-17	4.79e-17	4.8e-17	4.8e-17	0.885269	0.885243	0.885208	0.885191	0.885182
14.66	4.77e-17	4.78e-17	4.79e-17	4.8e-17	4.8e-17	0.88029	0.880264	0.880229	0.880211	0.880203
14.67	4.77e-17	4.78e-17	4.79e-17	4.8e-17	4.8e-17	0.87531	0.875284	0.875249	0.875232	0.875223
14.68	4.77e-17	4.78e-17	4.79e-17	4.8e-17	4.8e-17	0.870331	0.870305	0.87027	0.870252	0.870244
14.69	4.77e-17	4.78e-17	4.79e-17	4.8e-17	4.8e-17	0.865352	0.865325	0.865291	0.865273	0.865264
14.7	4.77e-17	4.78e-17	4.79e-17	4.8e-17	4.8e-17	0.860372	0.860346	0.860311	0.860294	0.860285
14.71	4.77e-17	4.78e-17	4.79e-17	4.8e-17	4.8e-17	0.855393	0.855367	0.855332	0.855314	0.855306
14.72	4.77e-17	4.78e-17	4.79e-17	4.8e-17	4.8e-17	0.850414	0.850387	0.850352	0.850335	0.850326
14.73	4.77e-17	4.78e-17	4.79e-17	4.8e-17	4.8e-17	0.845434	0.845408	0.845373	0.845356	0.845347
14.74	4.77e-17	4.78e-17	4.79e-17	4.8e-17	4.8e-17	0.840455	0.840429	0.840394	0.840376	0.840367
14.75	4.77e-17	4.78e-17	4.79e-17	4.8e-17	4.8e-17	0.835475	0.835449	0.835414	0.835397	0.835388
14.76	4.77e-17	4.78e-17	4.79e-17	4.8e-17	4.8e-17	0.830496	0.83047	0.830435	0.830417	0.830409
14.77	4.77e-17	4.78e-17	4.79e-17	4.8e-17	4.8e-17	0.825517	0.82549	0.825455	0.825438	0.825429
14.78	4.77e-17	4.78e-17	4.79e-17	4.8e-17	4.8e-17	0.820537	0.820511	0.820476	0.820459	0.82045
14.79	4.77e-17	4.78e-17	4.79e-17	4.8e-17	4.8e-17	0.815558	0.815532	0.815497	0.815479	0.81547
14.8	4.77e-17	4.78e-17	4.79e-17	4.8e-17	4.8e-17	0.810578	0.810552	0.810517	0.8105	0.810491
14.81	4.77e-17	4.78e-17	4.79e-17	4.8e-17	4.8e-17	0.805599	0.805573	0.805538	0.80552	0.805512
14.82	4.77e-17	4.78e-17	4.79e-17	4.8e-17	4.8e-17	0.80062	0.800593	0.800558	0.800541	0.800532
14.83	4.77e-17	4.78e-17	4.79e-17	4.8e-17	4.8e-17	0.79564	0.795614	0.795579	0.795562	0.795553
14.84	4.77e-17	4.78e-17	4.79e-17	4.8e-17	4.8e-17	0.790661	0.790635	0.7906	0.790582	0.790573
14.85	4.77e-17	4.78e-17	4.79e-17	4.8e-17	4.8e-17	0.785681	0.785655	0.78562	0.785603	0.785594
14.86	4.77e-17	4.78e-17	4.79e-17	4.8e-17	4.8e-17	0.780702	0.780676	0.780641	0.780623	0.780615
14.87	4.77e-17	4.78e-17	4.79e-17	4.8e-17	4.8e-17	0.775723	0.775696	0.775661	0.775644	0.775635
14.88	4.77e-17	4.78e-17	4.79e-17	4.8e-17	4.8e-17	0.770743	0.770717	0.770682	0.770665	0.770656
14.89	4.77e-17	4.78e-17	4.79e-17	4.8e-17	4.8e-17	0.765764	0.765738	0.765703	0.765685	0.765676
14.9	4.77e-17	4.78e-17	4.79e-17	4.8e-17	4.8e-17	0.760784	0.760758	0.760723	0.760706	0.760697
14.91	4.77e-17	4.78e-17	4.79e-17	4.8e-17	4.8e-17	0.755805	0.755779	0.755744	0.755726	0.755718
14.92	4.77e-17	4.78e-17	4.79e-17	4.8e-17	4.8e-17	0.750826	0.750799	0.750764	0.750747	0.750738
14.93	4.77e-17	4.78e-17	4.79e-17	4.8e-17	4.8e-17	0.745846	0.74582	0.745785	0.745768	0.745759
14.94	4.77e-17	4.78e-17	4.79e-17	4.8e-17	4.8e-17	0.740867	0.740841	0.740806	0.740788	0.74078
14.95	4.77e-17	4.78e-17	4.79e-17	4.8e-17	4.8e-17	0.735887	0.735861	0.735826	0.735809	0.7358
14.96	4.77e-17	4.78e-17	4.79e-17	4.8e-17	4.8e-17	0.730908	0.730882	0.730847	0.730829	0.730821
14.97	4.77e-17	4.78e-17	4.79e-17	4.8e-17	4.8e-17	0.725929	0.725902	0.725868	0.72585	0.725841
14.98	4.77e-17	4.78e-17	4.79e-17	4.8e-17	4.8e-17	0.720949	0.720923	0.720888	0.720871	0.720862
14.99	4.77e-17	4.78e-17	4.79e-17	4.8e-17	4.8e-17	0.71597	0.715944	0.715909	0.715891	0.715883
15	4.77e-17	4.78e-17	4.79e-17	4.8e-17	4.8e-17	0.71099	0.710964	0.710929	0.710912	0.710903
15.01	4.77e-17	4.78e-17	4.79e-17	4.8e-17	4.8e-17	0.706011	0.705985	0.70595	0.705932	0.705924
15.02	4.77e-17	4.78e-17	4.79e-17	4.8e-17	4.8e-17	0.701032	0.701005	0.700971	0.700953	0.700944
15.03	4.77e-17	4.78e-17	4.79e-17	4.8e-17	4.8e-17	0.696052	0.696026	0.695991	0.695974	0.695965
15.04	4.77e-17	4.78e-17	4.79e-17	4.8e-17	4.8e-17	0.691073	0.691047	0.691012	0.690994	0.690986
15.05	4.77e-17	4.78e-17	4.79e-17	4.8e-17	4.8e-17	0.686094	0.686067	0.686032	0.686015	0.686006
15.06	4.77e-17	4.78e-17	4.79e-17	4.8e-17	4.8e-17	0.681114	0.681088	0.681053	0.681036	0.681027
15.07	4.77e-17	4.78e-17	4.79e-17	4.8e-17	4.8e-17	0.676135	0.676109	0.676074	0.676056	0.676047
15.08	4.77e-17	4.78e-17	4.79e-17	4.8e-17	4.8e-17	0.671155	0.671129	0.671094	0.671077	0.671068
15.09	4.77e-17	4.78e-17	4.79e-17	4.8e-17	4.8e-17	0.666176	0.66615	0.666115	0.666097	0.666089
15.1	4.77e-17	4.78e-17	4.79e-17	4.8e-17	4.8e-17	0.661197	0.66117	0.661135	0.661118	0.661109
15.11	4.77e-17	4.78e-17	4.79e-17	4.8e-17	4.8e-17	0.656217	0.656191	0.656156	0.656139	0.65613
15.12	4.77e-17	4.78e-17	4.79e-17	4.8e-17	4.8e-17	0.651238	0.651212	0.651177	0.651159	0.65115
15.13	4.77e-17	4.78e-17	4.79e-17	4.8e-17	4.8e-17	0.646258	0.646232	0.646197	0.64618	0.646171
15.14	4.77e-17	4.78e-17	4.79e-17	4.8e-17	4.8e-17	0.641279	0.641253	0.641218	0.6412	0.641192
15.15	4.77e-17	4.78e-17	4.79e-17	4.8e-17	4.8e-17	0.6363	0.636273	0.636238	0.636221	0.636212
15.16	4.77e-17	4.78e-17	4.79e-17	4.8e-17	4.8e-17	0.63132	0.631294	0.631259	0.631242	0.631233
15.17	4.77e-17	4.78e-17	4.79e-17	4.8e-17	4.8e-17	0.626341	0.626315	0.62628	0.626262	0.626253
15.18	4.77e-17	4.78e-17	4.79e-17	4.8e-17	4.8e-17	0.621361	0.621335	0.6213	0.621283	0.621274
15.19	4.77e-17	4.78e-17	4.79e-17	4.8e-17	4.8e-17	0.616382	0.616356	0.616321	0.616303	0.616295
15.2	4.77e-17	4.78e-17	4.79e-17	4.8e-17	4.8e-17	0.611403	0.611376	0.611341	0.611324	0.611315
15.21	4.77e-17	4.78e-17	4.79e-17	4.8e-17	4.8e-17	0.606423	0.606397	0.606362	0.606345	0.606336
15.22	4.77e-17	4.78e-17	4.79e-17	4.8e-17	4.8e-17	0.601444	0.601418	0.601383	0.601365	0.601356
15.23	4.77e-17	4.78e-17	4.79e-17	4.8e-17	4.8e-17	0.596464	0.596438	0.596403	0.596386	0.596377
15.24	4.77e-17	4.78e-17	4.79e-17	4.8e-17	4.8e-17	0.591485	0.591459	0.591424	0.591406	0.591398
15.25	4.77e-17	4.78e-17	4.79e-17	4.8e-17	4.8e-17	0.586506	0.586479	0.586444	0.586427	0.586418
15.26	4.77e-17	4.78e-17	4.79e-17	4.8e-17	4.8e-17	0.581526	0.5815	0.581465	0.581448	0.581439
15.27	4.77e-17	4.78e-17	4.79e-17	4.8e-17	4.8e-17	0.576547	0.576521	0.576486	0.576468	0.57646
15.28	4.77e-17	4.78e-17	4.79e-17	4.8e-17	4.8e-17	0.571567	0.571541	0.571506	0.571489	0.57148
15.29	4.77e-17	4.78e-17	4.79e-17	4.8e-17	4.8e-17	0.566588	0.566562	0.566527	0.566509	0.566501
15.3	4.77e-17	4.78e-17	4.79e-17	4.8e-17	4.8e-17	0.561609	0.561582	0.561548	0.56153	0.561521
15.31	4.77e-17	4.78e-17	4.79e-17	4.8e-17	4.8e-17	0.556629	0.556603	0.556568	0.556551	0.556542
15.32	4.77e-17	4.78e-17	4.79e-17	4.8e-17	4.8e-17	0.55165	0.551624	0.551589	0.551571	0.551563
15.33	4.77e-17	4.78e-17	4.79e-17	4.8e-17	4.8e-17	0.54667	0.546644	0.546609	0.546592	0.546583
15.34	4.77e-17	4.78e-17	4.79e-17	4.8e-17	4.8e-17	0.541691	0.541665	0.54163	0.541612	0.541604
15.35	4.77e-17	4.78e-17	4.79e-17	4.8e-17	4.8e-17	0.536712	0.536686	0.536651	0.536633	0.536624
15.36	4.77e-17	4.78e-17	4.79e-17	4.8e-17	4.8e-17	0.531732	0.531706	0.531671	0.531654	0.531645
15.37	4.77e-17	4.78e-17	4.79e-17	4.8e-17	4.8e-17	0.526753	0.526727	0.526692	0.526674	0.526666
15.38	4.77e-17	4.78e-17	4.79e-17	4.8e-17	4.8e-17	0.521774	0.521747	0.521712	0.521695	0.521686
15.39	4.77e-17	4.78e-17	4.79e-17	4.8e-17	4.8e-17	0.516794	0.516768	0.516733	0.516716	0.516707
15.4	4.77e-17	4.78e-17	4.79e-17	4.8e-17	4.8e-17	0.511815	0.511789	0.511754	0.511736	0.511727
15.41	4.77e-17	4.78e-17	4.79e-17	4.8e-17	4.8e-17	0.506835	0.506809	0.506774	0.506757	0.506748
15.42	4.77e-17	4.78e-17	4.79e-17	4.8e-17	4.8e-17	0.501856	0.50183	0.501795	0.501777	0.501769
15.43	4.77e-17	4.78e-17	4.79e-17	4.8e-17	4.8e-17	0.496877	0.49685	0.496815	0.496798	0.496789
15.44	4.77e-17	4.78e-17	4.79e-17	4.8e-17	4.8e-17	0.491897	0.491871	0.491836	0.491819	0.49181
15.45	4.77e-17	4.78e-17	4.79e-17	4.8e-17	4.8e-17	0.486918	0.486892	0.486857	0.486839	0.48683
15.46	4.77e-17	4.78e-17	4.79e-17	4.8e-17	4.8e-17	0.481938	0.481912	0.481877	0.48186	0.481851
15.47	4.77e-17	4.78e-17	4.79e-17	4.8e-17	4.8e-17	0.476959	0.476933	0.476898	0.47688	0.476872
15.48	4.77e-17	4.78e-17	4.79e-17	4.8e-17	4.8e-17	0.47198	0.471953	0.471918	0.471901	0.471892
15.49	4.77e-17	4.78e-17	4.79e-17	4.8e-17	4.8e-17	0.467	0.466974	0.466939	0.466922	0.466913
15.5	4.77e-17	4.78e-17	4.79e-17	4.8e-17	4.8e-17	0.462021	0.461995	0.46196	0.461942	0.461933
15.51	4.77e-17	4.78e-17	4.79e-17	4.8e-17	4.8e-17	0.457041	0.457015	0.45698	0.456963	0.456954
15.52	4.77e-17	4.78e-17	4.79e-17	4.8e-17	4.8e-17	0.452062	0.452036	0.452001	0.451983	0.451975
15.53	4.77e-17	4.78e-17	4.79e-17	4.8e-17	4.8e-17	0.447083	0.447056	0.447021	0.447004	0.446995
15.54	4.77e-17	4.78e-17	4.79e-17	4.8e-17	4.8e-17	0.442103	0.442077	0.442042	0.442025	0.442016
15.55	4.77e-17	4.78e-17	4.79e-17	4.8e-17	4.8e-17	0.437124	0.437098	0.437063	0.437045	0.437036
15.56	4.77e-17	4.78e-17	4.79e-17	4.8e-17	4.8e-17	0.432144	0.432118	0.432083	0.432066	0.432057
15.57	4.77e-17	4.78e-17	4.79e-17	4.8e-17	4.8e-17	0.427165	0.427139	0.427104	0.427086	0.427078
15.58	4.77e-17	4.78e-17	4.79e-17	4.8e-17	4.8e-17	0.422186	0.422159	0.422125	0.422107	0.422098
15.59	4.77e-17	4.78e-17	4.79e-17	4.8e-17	4.8e-17	0.417206	0.41718	0.417145	0.417128	0.417119
15.6	4.77e-17	4.78e-17	4.79e-17	4.8e-17	4.8e-17	0.412227	0.412201	0.412166	0.412148	0.41214
15.61	4.77e-17	4.78e-17	4.79e-17	4.8e-17	4.8e-17	0.407247	0.407221	0.407186	0.407169	0.40716
15.62	4.77e-17	4.78e-17	4.79e-17	4.8e-17	4.8e-17	0.402268	0.402242	0.402207	0.402189	0.402181
15.63	4.77e-17	4.78e-17	4.79e-17	4.8e-17	4.8e-17	0.397289	0.397262	0.397228	0.39721	0.397201
15.64	4.77e-17	4.78e-17	4.79e-17	4.8e-17	4.8e-17	0.392309	0.392283	0.392248	0.392231	0.392222
15.65	4.77e-17	4.78e-17	4.79e-17	4.8e-17	4.8e-17	0.38733	0.387304	0.387269	0.387251	0.387243
15.66	4.77e-17	4.78e-17	4.79e-17	4.8e-17	4.8e-17	0.38235	0.382324	0.382289	0.382272	0.382263
15.67	4.77e-17	4.78e-17	4.79e-17	4.8e-17	4.8e-17	0.377371	0.377345	0.37731	0.377292	0.377284
15.68	4.77e-17	4.78e-17	4.79e-17	4.8e-17	4.8e-17	0.372392	0.372366	0.372331	0.372313	0.372304
15.69	4.77e-17	4.78e-17	4.79e-17	4.8e-17	4.8e-17	0.367412	0.367386	0.367351	0.367334	0.367325
15.7	4.77e-17	4.78e-17	4.79e-17	4.8e-17	4.8e-17	0.362433	0.362407	0.362372	0.362354	0.362346
15.71	4.77e-17	4.78e-17	4.79e-17	4.8e-17	4.8e-17	0.357454	0.357427	0.357392	0.357375	0.357366
15.72	4.77e-17	4.78e-17	4.79e-17	4.8e-17	4.8e-17	0.352474	0.352448	0.352413	0.352396	0.352387
15.73	4.77e-17	4.78e-17	4.79e-17	4.8e-17	4.8e-17	0.347495	0.347469	0.347434	0.347416	0.347407
15.74	4.77e-17	4.78e-17	4.79e-17	4.8e-17	4.8e-17	0.342515	0.342489	0.342454	0.342437	0.342428
15.75	4.77e-17	4.78e-17	4.79e-17	4.8e-17	4.8e-17	0.337536	0.33751	0.337475	0.337457	0.337449
15.76	4.77e-17	4.78e-17	4.79e-17	4.8e-17	4.8e-17	0.332557	0.33253	0.332495	0.332478	0.332469
15.77	4.77e-17	4.78e-17	4.79e-17	4.8e-17	4.8e-17	0.327577	0.327551	0.327516	0.327499	0.32749
15.78	4.77e-17	4.78e-17	4.79e-17	4.8e-17	4.8e-17	0.322598	0.322572	0.322537	0.322519	0.32251
15.79	4.77e-17	4.78e-17	4.79e-17	4.8e-17	4.8e-17	0.317618	0.317592	0.317557	0.31754	0.317531
15.8	4.77e-17	4.78e-17	4.79e-17	4.8e-17	4.8e-17	0.312639	0.312613	0.312578	0.31256	0.312552
15.81	4.77e-17	4.78e-17	4.79e-17	4.8e-17	4.8e-17	0.30766	0.307633	0.307598	0.307581	0.307572
15.82	4.77e-17	4.78e-17	4.79e-17	4.8e-17	4.8e-17	0.30268	0.302654	0.302619	0.302602	0.302593
15.83	4.77e-17	4.78e-17	4.79e-17	4.8e-17	4.8e-17	0.297701	0.297675	0.29764	0.297622	0.297613
15.84	4.77e-17	4.78e-17	4.79e-17	4.8e-17	4.8e-17	0.292721	0.292695	0.29266	0.292643	0.292634
15.85	4.77e-17	4.78e-17	4.79e-17	4.8e-17	4.8e-17	0.287742	0.287716	0.287681	0.287663	0.287655
15.86	4.77e-17	4.78e-17	4.79e-17	4.8e-17	4.8e-17	0.282763	0.282736	0.282701	0.282684	0.282675
15.87	4.77e-17	4.78e-17	4.79e-17	4.8e-17	4.8e-17	0.277783	0.277757	0.277722	0.277705	0.277696
15.88	4.77e-17	4.78e-17	4.79e-17	4.8e-17	4.8e-17	0.272804	0.272778	0.272743	0.272725	0.272716
15.89	4.77e-17	4.78e-17	4.79e-17	4.8e-17	4.8e-17	0.267824	0.267798	0.267763	0.267746	0.267737
15.9	4.77e-17	4.78e-17	4.79e-17	4.8e-17	4.8e-17	0.262845	0.262819	0.262784	0.262766	0.262758
15.91	4.77e-17	4.78e-17	4.79e-17	4.8e-17	4.8e-17	0.257866	0.257839	0.257805	0.257787	0.257778
15.92	4.77e-17	4.78e-17	4.79e-17	4.8e-17	4.8e-17	0.252886	0.25286	0.252825	0.252808	0.252799
15.93	4.77e-17	4.78e-17	4.79e-17	4.8e-17	4.8e-17	0.247907	0.247881	0.247846	0.247828	0.24782
15.94	4.77e-17	4.78e-17	4.79e-17	4.8e-17	4.8e-17	0.242927	0.242901	0.242866	0.242849	0.24284
15.95	4.77e-17	4.78e-17	4.79e-17	4.8e-17	4.8e-17	0.237948	0.237922	0.237887	0.237869	0.237861
15.96	4.77e-17	4.78e-17	4.79e-17	4.8e-17	4.8e-17	0.232969	0.232942	0.232908	0.23289	0.232881
15.97	4.77e-17	4.78e-17	4.79e-17	4.8e-17	4.8e-17	0.227989	0.227963	0.227928	0.227911	0.227902
15.98	4.77e-17	4.78e-17	4.79e-17	4.8e-17	4.8e-17	0.22301	0.222984	0.222949	0.222931	0.222923
15.99	4.77e-17	4.78e-17	4.79e-17	4.8e-17	4.8e-17	0.21803	0.218004	0.217969	0.217952	0.217943
16	4.77e-17	4.78e-17	4.79e-17	4.8e-17	4.8e-17	0.213051	0.213025	0.21299	0.212972	0.212964
16.01	4.77e-17	4.78e-17	4.79e-17	4.8e-17	4.8e-17	0.208072	0.208046	0.208011	0.207993	0.207984
16.02	4.77e-17	4.78e-17	4.79e-17	4.8e-17	4.8e-17	0.203092	0.203066	0.203031	0.203014	0.203005
16.03	4.77e-17	4.78e-17	4.79e-17	4.8e-17	4.8e-17	0.198113	0.198087	0.198052	0.198034	0.198026
16.04	4.77e-17	4.78e-17	4.79e-17	4.8e-17	4.8e-17	0.193134	0.193107	0.193072	0.193055	0.193046
16.05	4.77e-17	4.78e-17	4.79e-17	4.8e-17	4.8e-17	0.188154	0.188128	0.188093	0.188076	0.188067
16.06	4.77e-17	4.78e-17	4.79e-17	4.8e-17	4.8e-17	0.183175	0.183149	0.183114	0.183096	0.183087
16.07	4.77e-17	4.78e-17	4.79e-17	4.8e-17	4.8e-17	0.178195	0.178169	0.178134	0.178117	0.178108
16.08	4.77e-17	4.78e-17	4.79e-17	4.8e-17	4.8e-17	0.173216	0.17319	0.173155	0.173137	0.173129
16.09	4.77e-17	4.78e-17	4.79e-17	4.8e-17	4.8e-17	0.168237	0.16821	0.168175	0.168158	0.168149
16.1	4.77e-17	4.78e-17	4.79e-17	4.8e-17	4.8e-17	0.163257	0.163231	0.163196	0.163179	0.16317
16.11	4.77e-17	4.78e-17	4.79e-17	4.8e-17	4.8e-17	0.158278	0.158252	0.158217	0.158199	0.15819
16.12	4.77e-17	4.78e-17	4.79e-17	4.8e-17	4.8e-17	0.153298	0.153272	0.153237	0.15322	0.153211
16.13	4.77e-17	4.78e-17	4.79e-17	4.8e-17	4.8e-17	0.148319	0.148293	0.148258	0.14824	0.148232
16.14	4.77e-17	4.78e-17	4.79e-17	4.8e-17	4.8e-17	0.14334	0.143313	0.143278	0.143261	0.143252
16.15	4.77e-17	4.78e-17	4.79e-17	4.8e-17	4.8e-17	0.13836	0.138334	0.138299	0.138282	0.138273
16.16	4.77e-17	4.78e-17	4.79e-17	4.8e-17	4.8e-17	0.133381	0.133355	0.13332	0.133302	0.133293
16.17	4.77e-17	4.78e-17	4.79e-17	4.8e-17	4.8e-17	0.128401	0.128375	0.12834	0.128323	0.128314
16.18	4.77e-17	4.78e-17	4.79e-17	4.8e-17	4.8e-17	0.123422	0.123396	0.123361	0.123343	0.123335
16.19	4.77e-17	4.78e-17	4.79e-17	4.8e-17	4.8e-17	0.118443	0.118416	0.118381	0.118364	0.118355
16.2	4.77e-17	4.78e-17	4.79e-17	4.8e-17	4.8e-17	0.113463	0.113437	0.113402	0.113385	0.113376
16.21	4.77e-17	4.78e-17	4.79e-17	4.8e-17	4.8e-17	0.108484	0.108458	0.108423	0.108405	0.108396
16.22	4.77e-17	4.78e-17	4.79e-17	4.8e-17	4.8e-17	0.103504	0.103478	0.103443	0.103426	0.103417
16.23	4.77e-17	4.78e-17	4.79e-17	4.8e-17	4.8e-17	0.098525	0.0984988	0.0984639	0.0984464	0.0984377
16.24	4.77e-17	4.78e-17	4.79e-17	4.8e-17	4.8e-17	0.0935457	0.0935194	0.0934845	0.093467	0.0934583
16.25	4.77e-17	4.78e-17	4.79e-17	4.8e-17	4.8e-17	0.0885663	0.0885401	0.0885051	0.0884876	0.0884789
16.26	4.77e-17	4.78e-17	4.79e-17	4.8e-17	4.8e-17	0.0835869	0.0835607	0.0835257	0.0835082	0.0834995
16.27	4.77e-17	4.78e-17	4.79e-17	4.8e-17	4.8e-17	0.0786075	0.0785813	0.0785463	0.0785289	0.0785201
16.28	4.77e-17	4.78e-17	4.79e-17	4.8e-17	4.8e-17	0.0736281	0.0736019	0.0735669	0.0735495	0.0735407
16.29	4.77e-17	4.78e-17	4.79e-17	4.8e-17	4.8e-17	0.0686487	0.0686225	0.0685875	0.0685701	0.0685613
16.3	4.77e-17	4.78e-17	4.79e-17	4.8e-17	4.8e-17	0.0636693	0.0636431	0.0636081	0.0635907	0.0635819
16.31	4.77e-17	4.78e-17	4.79e-17	4.8e-17	4.8e-17	0.0586899	0.0586637	0.0586287	0.0586113	0.0586025
16.32	4.77e-17	4.78e-17	4.79e-17	4.8e-17	4.8e-17	0.0537105	0.0536843	0.0536494	0.0536319	0.0536231
16.33	4.77e-17	4.78e-17	4.79e-17	4.8e-17	4.8e-17	0.0487311	0.0487049	0.04867	0.0486525	0.0486438
16.34	4.77e-17	4.78e-17	4.79e-17	4.8e-17	4.8e-17	0.0437517	0.0437255	0.0436906	0.0436731	0.0436644
16.35	4.77e-17	4.78e-17	4.79e-17	4.8e-17	4.8e-17	0.0387723	0.0387461	0.0387112	0.0386937	0.038685
16.36	4.77e-17	4.78e-17	4.79e-17	4.8e-17	4.8e-17	0.0337929	0.0337667	0.0337318	0.0337143	0.0337056
16.37	4.77e-17	4.78e-17	4.79e-17	4.8e-17	4.8e-17	0.0288135	0.0287873	0.0287524	0.0287349	0.0287262
16.38	4.77e-17	4.78e-17	4.79e-17	4.8e-17	4.8e-17	0.0238341	0.0238079	0.023773	0.0237555	0.0237468
16.39	4.77e-17	4.78e-17	4.79e-17	4.8e-17	4.8e-17	0.0188547	0.0188285	0.0187936	0.0187761	0.0187674
16.4	4.77e-17	4.78e-17	4.79e-17	4.8e-17	4.8e-17	0.0138753	0.0138491	0.0138142	0.0137967	0.013788
16.41	4.77e-17	4.78e-17	4.79e-17	4.8e-17	4.8e-17	0.00889596	0.00886975	0.00883481	0.00881734	0.0088086
16.42	4.77e-17	4.78e-17	4.79e-17	4.8e-17	4.8e-17	0.00391656	0.00389036	0.00385542	0.00383794	0.00382921
16.43	4.77e-17	4.78e-17	4.79e-17	4.8e-17	4.8e-17	-0.00106283	-0.00108904	-0.00112398	-0.00114145	-0.00115019
16.44	4.77e-17	4.78e-17	4.79e-17	4.8e-17	4.8e-17	-0.00604223	-0.00606843	-0.00610337	-0.00612084	-0.00612958
16.45	4.77e-17	4.78e-17	4.79e-17	4.8e-17	4.8e-17	-0.0110216	-0.0110478	-0.0110828	-0.0111002	-0.011109
16.46	4.77e-17	4.78e-17	4.79e-17	4.8e-17	4.8e-17	-0.016001	-0.0160272	-0.0160622	-0.0160796	-0.0160884
16.47	4.77e-17	4.78e-17	4.79e-17	4.8e-17	4.8e-17	-0.0209804	-0.0210066	-0.0210416	-0.021059	-0.0210678
16.48	4.77e-17	4.78e-17	4.79e-17	4.8e-17	4.8e-17	-0.0259598	-0.025986	-0.0260209	-0.0260384	-0.0260472
16.49	4.77e-17	4.78e-17	4.79e-17	4.8e-17	4.8e-17	-0.0309392	-0.0309654	-0.0310003	-0.0310178	-0.0310265
16.5	4.77e-17	4.78e-17	4.79e-17	4.8e-17	4.8e-17	-0.0359186	-0.0359448	-0.0359797	-0.0359972	-0.0360059
16.51	4.77e-17	4.78e-17	4.79e-17	4.8e-17	4.8e-17	-0.040898	-0.0409242	-0.0409591	-0.0409766	-0.0409853
16.52	4.77e-17	4.78e-17	4.79e-17	4.8e-17	4.8e-17	-0.0458774	-0.0459036	-0.0459385	-0.045956	-0.0459647
16.53	4.77e-17	4.78e-17	4.79e-17	4.8e-17	4.8e-17	-0.0508568	-0.050883	-0.0509179	-0.0509354	-0.0509441
16.54	4.77e-17	4.78e-17	4.79e-17	4.8e-17	4.8e-17	-0.0558362	-0.0558624	-0.0558973	-0.0559148	-0.0559235
16.55	4.77e-17	4.78e-17	4.79e-17	4.8e-17	4.8e-17	-0.0608156	-0.0608418	-0.0608767	-0.0608942	-0.0609029
16.56	4.77e-17	4.78e-17	4.79e-17	4.8e-17	4.8e-17	-0.065795	-0.0658212	-0.0658561	-0.0658736	-0.0658823
16.57	4.77e-17	4.78e-17	4.79e-17	4.8e-17	4.8e-17	-0.0707743	-0.0708006	-0.0708355	-0.070853	-0.0708617
16.58	4.77e-17	4.78e-17	4.79e-17	4.8e-17	4.8e-17	-0.0757537	-0.0757799	-0.0758149	-0.0758324	-0.0758411
16.59	4.77e-17	4.78e-17	4.79e-17	4.8e-17	4.8e-17	-0.0807331	-0.0807593	-0.0807943	-0.0808118	-0.0808205
16.6	4.77e-17	4.78e-17	4.79e-17	4.8e-17	4.8e-17	-0.0857125	-0.0857387	-0.0857737	-0.0857911	-0.0857999
16.61	4.77e-17	4.78e-17	4.79e-17	4.8e-17	4.8e-17	-0.0906919	-0.0907181	-0.0907531	-0.0907705	-0.0907793
16.62	4.77e-17	4.78e-17	4.79e-17	4.8e-17	4.8e-17	-0.0956713	-0.0956975	-0.0957325	-0.0957499	-0.0957587
16.63	4.77e-17	4.78e-17	4.79e-17	4.8e-17	4.8e-17	-0.100651	-0.100677	-0.100712	-0.100729	-0.100738
16.64	4.77e-17	4.78e-17	4.79e-17	4.8e-17	4.8e-17	-0.10563	-0.105656	-0.105691	-0.105709	-0.105717
16.65	4.77e-17	4.78e-17	4.79e-17	4.8e-17	4.8e-17	-0.110609	-0.110636	-0.110671	-0.110688	-0.110697
16.66	4.77e-17	4.78e-17	4.79e-17	4.8e-17	4.8e-17	-0.115589	-0.115615	-0.11565	-0.115668	-0.115676
16.67	4.77e-17	4.78e-17	4.79e-17	4.8e-17	4.8e-17	-0.120568	-0.120594	-0.120629	-0.120647	-0.120656
16.68	4.77e-17	4.78e-17	4.79e-17	4.8e-17	4.8e-17	-0.125548	-0.125574	-0.125609	-0.125626	-0.125635
16.69	4.77e-17	4.78e-17	4.79e-17	4.8e-17	4.8e-17	-0.130527	-0.130553	-0.130588	-0.130606	-0.130614
16.7	4.77e-17	4.78e-17	4.79e-17	4.8e-17	4.8e-17	-0.135506	-0.135533	-0.135568	-0.135585	-0.135594
16.71	4.77e-17	4.78e-17	4.79e-17	4.8e-17	4.8e-17	-0.140486	-0.140512	-0.140547	-0.140564	-0.140573
16.72	4.77e-17	4.78e-17	4.79e-17	4.8e-17	4.8e-17	-0.145465	-0.145491	-0.145526	-0.145544	-0.145553
16.73	4.77e-17	4.78e-17	4.79e-17	4.8e-17	4.8e-17	-0.150445	-0.150471	-0.150506	-0.150523	-0.150532
16.74	4.77e-17	4.78e-17	4.79e-17	4.8e-17	4.8e-17	-0.155424	-0.15545	-0.155485	-0.155503	-0.155511
16.75	4.77e-17	4.78e-17	4.79e-17	4.8e-17	4.8e-17	-0.160403	-0.16043	-0.160465	-0.160482	-0.160491
16.76	4.77e-17	4.78e-17	4.79e-17	4.8e-17	4.8e-17	-0.165383	-0.165409	-0.165444	-0.165461	-0.16547
16.77	4.77e-17	4.78e-17	4.79e-17	4.8e-17	4.8e-17	-0.170362	-0.170388	-0.170423	-0.170441	-0.17045
16.78	4.77e-17	4.78e-17	4.79e-17	4.8e-17	4.8e-17	-0.175342	-0.175368	-0.175403	-0.17542	-0.175429
16.79	4.77e-17	4.78e-17	4.79e-17	4.8e-17	4.8e-17	-0.180321	-0.180347	-0.180382	-0.1804	-0.180408
16.8	4.77e-17	4.78e-17	4.79e-17	4.8e-17	4.8e-17	-0.1853	-0.185327	-0.185362	-0.185379	-0.185388
16.81	4.77e-17	4.78e-17	4.79e-17	4.8e-17	4.8e-17	-0.19028	-0.190306	-0.190341	-0.190358	-0.190367
16.82	4.77e-17	4.78e-17	4.79e-17	4.8e-17	4.8e-17	-0.195259	-0.195285	-0.19532	-0.195338	-0.195347
16.83	4.77e-17	4.78e-17	4.79e-17	4.8e-17	4.8e-17	-0.200239	-0.200265	-0.2003	-0.200317	-0.200326
16.84	4.77e-17	4.78e-17	4.79e-17	4.8e-17	4.8e-17	-0.205218	-0.205244	-0.205279	-0.205297	-0.205305
16.85	4.77e-17	4.78e-17	4.79e-17	4.8e-17	4.8e-17	-0.210197	-0.210224	-0.210259	-0.210276	-0.210285
16.86	4.77e-17	4.78e-17	4.79e-17	4.8e-17	4.8e-17	-0.215177	-0.215203	-0.215238	-0.215255	-0.215264
16.87	4.77e-17	4.78e-17	4.79e-17	4.8e-17	4.8e-17	-0.220156	-0.220182	-0.220217	-0.220235	-0.220244
16.88	4.77e-17	4.78e-17	4.79e-17	4.8e-17	4.8e-17	-0.225136	-0.225162	-0.225197	-0.225214	-0.225223
16.89	4.77e-17	4.78e-17	4.79e-17	4.8e-17	4.8e-17	-0.230115	-0.230141	-0.230176	-0.230194	-0.230202
16.9	4.77e-17	4.78e-17	4.79e-17	4.8e-17	4.8e-17	-0.235094	-0.235121	-0.235155	-0.235173	-0.235182
16.91	4.77e-17	4.78e-17	4.79e-17	4.8e-17	4.8e-17	-0.240074	-0.2401	-0.240135	-0.240152	-0.240161
16.92	4.77e-17	4.78e-17	4.79e-17	4.8e-17	4.8e-17	-0.245053	-0.245079	-0.245114	-0.245132	-0.24514
16.93	4.77e-17	4.78e-17	4.79e-17	4.8e-17	4.8e-17	-0.250033	-0.250059	-0.250094	-0.250111	-0.25012
16.94	4.77e-17	4.78e-17	4.79e-17	4.8e-17	4.8e-17	-0.255012	-0.255038	-0.255073	-0.255091	-0.255099
16.95	4.77e-17	4.78e-17	4.79e-17	4.8e-17	4.8e-17	-0.259991	-0.260018	-0.260052	-0.26007	-0.260079
16.96	4.77e-17	4.78e-17	4.79e-17	4.8e-17	4.8e-17	-0.264971	-0.264997	-0.265032	-0.265049	-0.265058
16.97	4.77e-17	4.78e-17	4.79e-17	4.8e-17	4.8e-17	-0.26995	-0.269976	-0.270011	-0.270029	-0.270037
16.98	4.77e-17	4.78e-17	4.79e-17	4.8e-17	4.8e-17	-0.274929	-0.274956	-0.274991	-0.275008	-0.275017
16.99	4.77e-17	4.78e-17	4.79e-17	4.8e-17	4.8e-17	-0.279909	-0.279935	-0.27997	-0.279988	-0.279996
17	4.77e-17	4.78e-17	4.79e-17	4.8e-17	4.8e-17	-0.284888	-0.284914	-0.284949	-0.284967	-0.284976
17.01	4.77e-17	4.78e-17	4.79e-17	4.8e-17	4.8e-17	-0.289868	-0.289894	-0.289929	-0.289946	-0.289955
17.02	4.77e-17	4.78e-17	4.79e-17	4.8e-17	4.8e-17	-0.294847	-0.294873	-0.294908	-0.294926	-0.294934
17.03	4.77e-17	4.78e-17	4.79e-17	4.8e-17	4.8e-17	-0.299826	-0.299853	-0.299888	-0.299905	-0.299914
17.04	4.77e-17	4.78e-17	4.79e-17	4.8e-17	4.8e-17	-0.304806	-0.304832	-0.304867	-0.304884	-0.304893
17.05	4.77e-17	4.78e-17	4.79e-17	4.8e-17	4.8e-17	-0.309785	-0.309811	-0.309846	-0.309864	-0.309873
17.06	4.77e-17	4.78e-17	4.79e-17	4.8e-17	4.8e-17	-0.314765	-0.314791	-0.314826	-0.314843	-0.314852
17.07	4.77e-17	4.78e-17	4.79e-17	4.8e-17	4.8e-17	-0.319744	-0.31977	-0.319805	-0.319823	-0.319831
17.08	4.77e-17	4.78e-17	4.79e-17	4.8e-17	4.8e-17	-0.324723	-0.32475	-0.324785	-0.324802	-0.324811
17.09	4.77e-17	4.78e-17	4.79e-17	4.8e-17	4.8e-17	-0.329703	-0.329729	-0.329764	-0.329781	-0.32979
17.1	4.77e-17	4.78e-17	4.79e-17	4.8e-17	4.8e-17	-0.334682	-0.334708	-0.334743	-0.334761	-0.33477
17.11	4.77e-17	4.78e-17	4.79e-17	4.8e-17	4.8e-17	-0.339662	-0.339688	-0.339723	-0.33974	-0.339749
17.12	4.77e-17	4.78e-17	4.79e-17	4.8e-17	4.8e-17	-0.344641	-0.344667	-0.344702	-0.34472	-0.344728
17.13	4.77e-17	4.78e-17	4.79e-17	4.8e-17	4.8e-17	-0.34962	-0.349647	-0.349682	-0.349699	-0.349708
17.14	4.77e-17	4.78e-17	4.79e-17	4.8e-17	4.8e-17	-0.3546	-0.354626	-0.354661	-0.354678	-0.354687
17.15	4.77e-17	4.78e-17	4.79e-17	4.8e-17	4.8e-17	-0.359579	-0.359605	-0.35964	-0.359658	-0.359667
17.16	4.77e-17	4.78e-17	4.79e-17	4.8e-17	4.8e-17	-0.364559	-0.364585	-0.36462	-0.364637	-0.364646
17.17	4.77e-17	4.78e-17	4.79e-17	4.8e-17	4.8e-17	-0.369538	-0.369564	-0.369599	-0.369617	-0.369625
17.18	4.77e-17	4.78e-17	4.79e-17	4.8e-17	4.8e-17	-0.374517	-0.374544	-0.374579	-0.374596	-0.374605
17.19	4.77e-17	4.78e-17	4.79e-17	4.8e-17	4.8e-17	-0.379497	-0.379523	-0.379558	-0.379575	-0.379584
17.2	4.77e-17	4.78e-17	4.79e-17	4.8e-17	4.8e-17	-0.384476	-0.384502	-0.384537	-0.384555	-0.384564
17.21	4.77e-17	4.78e-17	4.79e-17	4.8e-17	4.8e-17	-0.389456	-0.389482	-0.389517	-0.389534	-0.389543
17.22	4.77e-17	4.78e-17	4.79e-17	4.8e-17	4.8e-17	-0.394435	-0.394461	-0.394496	-0.394514	-0.394522
17.23	4.77e-17	4.78e-17	4.79e-17	4.8e-17	4.8e-17	-0.399414	-0.399441	-0.399475	-0.399493	-0.399502
17.24	4.77e-17	4.78e-17	4.79e-17	4.8e-17	4.8e-17	-0.404394	-0.40442	-0.404455	-0.404472	-0.404481
17.25	4.77e-17	4.78e-17	4.79e-17	4.8e-17	4.8e-17	-0.409373	-0.409399	-0.409434	-0.409452	-0.40946
17.26	4.77e-17	4.78e-17	4.79e-17	4.8e-17	4.8e-17	-0.414353	-0.414379	-0.414414	-0.414431	-0.41444
17.27	4.77e-17	4.78e-17	4.79e-17	4.8e-17	4.8e-17	-0.419332	-0.419358	-0.419393	-0.419411	-0.419419
17.28	4.77e-17	4.78e-17	4.79e-17	4.8e-17	4.8e-17	-0.424311	-0.424338	-0.424372	-0.42439	-0.424399
17.29	4.77e-17	4.78e-17	4.79e-17	4.8e-17	4.8e-17	-0.429291	-0.429317	-0.429352	-0.429369	-0.429378
17.3	4.77e-17	4.78e-17	4.79e-17	4.8e-17	4.8e-17	-0.43427	-0.434296	-0.434331	-0.434349	-0.434357
17.31	4.77e-17	4.78e-17	4.79e-17	4.8e-17	4.8e-17	-0.439249	-0.439276	-0.439311	-0.439328	-0.439337
17.32	4.77e-17	4.78e-17	4.79e-17	4.8e-17	4.8e-17	-0.444229	-0.444255	-0.44429	-0.444308	-0.444316
17.33	4.77e-17	4.78e-17	4.79e-17	4.8e-17	4.8e-17	-0.449208	-0.449234	-0.449269	-0.449287	-0.449296
17.34	4.77e-17	4.78e-17	4.79e-17	4.8e-17	4.8e-17	-0.454188	-0.454214	-0.454249	-0.454266	-0.454275
17.35	4.77e-17	4.78e-17	4.79e-17	4.8e-17	4.8e-17	-0.459167	-0.459193	-0.459228	-0.459246	-0.459254
17.36	4.77e-17	4.78e-17	4.79e-17	4.8e-17	4.8e-17	-0.464146	-0.464173	-0.464208	-0.464225	-0.464234
17.37	4.77e-17	4.78e-17	4.79e-17	4.8e-17	4.8e-17	-0.469126	-0.469152	-0.469187	-0.469204	-0.469213
17.38	4.77e-17	4.78e-17	4.79e-17	4.8e-17	4.8e-17	-0.474105	-0.474131	-0.474166	-0.474184	-0.474193
17.39	4.77e-17	4.78e-17	4.79e-17	4.8e-17	4.8e-17	-0.479085	-0.479111	-0.479146	-0.479163	-0.479172
17.4	4.77e-17	4.78e-17	4.79e-17	4.8e-17	4.8e-17	-0.484064	-0.48409	-0.484125	-0.484143	-0.484151
17.41	4.77e-17	4.78e-17	4.79e-17	4.8e-17	4.8e-17	-0.489043	-0.48907	-0.489105	-0.489122	-0.489131
17.42	4.77e-17	4.78e-17	4.79e-17	4.8e-17	4.8e-17	-0.494023	-0.494049	-0.494084	-0.494101	-0.49411
17.43	4.77e-17	4.78e-17	4.79e-17	4.8e-17	4.8e-17	-0.499002	-0.499028	-0.499063	-0.499081	-0.49909
17.44	4.77e-17	4.78e-17	4.79e-17	4.8e-17	4.8e-17	-0.503982	-0.504008	-0.504043	-0.50406	-0.504069
17.45	4.77e-17	4.78e-17	4.79e-17	4.8e-17	4.8e-17	-0.508961	-0.508987	-0.509022	-0.50904	-0.509048
17.46	4.77e-17	4.78e-17	4.79e-17	4.8e-17	4.8e-17	-0.51394	-0.513967	-0.514002	-0.514019	-0.514028
17.47	4.77e-17	4.78e-17	4.79e-17	4.8e-17	4.8e-17	-0.51892	-0.518946	-0.518981	-0.518998	-0.519007
17.48	4.77e-17	4.78e-17	4.79e-17	4.8e-17	4.8e-17	-0.523899	-0.523925	-0.52396	-0.523978	-0.523987
17.49	4.77e-17	4.78e-17	4.79e-17	4.8e-17	4.8e-17	-0.528879	-0.528905	-0.52894	-0.528957	-0.528966
17.5	4.77e-17	4.78e-17	4.79e-17	4.8e-17	4.8e-17	-0.533858	-0.533884	-0.533919	-0.533937	-0.533945
17.51	4.77e-17	4.78e-17	4.79e-17	4.8e-17	4.8e-17	-0.538837	-0.538864	-0.538899	-0.538916	-0.538925
17.52	4.77e-17	4.78e-17	4.79e-17	4.8e-17	4.8e-17	-0.543817	-0.543843	-0.543878	-0.543895	-0.543904
17.53	4.77e-17	4.78e-17	4.79e-17	4.8e-17	4.8e-17	-0.548796	-0.548822	-0.548857	-0.548875	-0.548884
17.54	4.77e-17	4.78e-17	4.79e-17	4.8e-17	4.8e-17	-0.553776	-0.553802	-0.553837	-0.553854	-0.553863
17.55	4.77e-17	4.78e-17	4.79e-17	4.8e-17	4.8e-17	-0.558755	-0.558781	-0.558816	-0.558834	-0.558842
17.56	4.77e-17	4.78e-17	4.79e-17	4.8e-17	4.8e-17	-0.563734	-0.563761	-0.563795	-0.563813	-0.563822
17.57	4.77e-17	4.78e-17	4.79e-17	4.8e-17	4.8e-17	-0.568714	-0.56874	-0.568775	-0.568792	-0.568801
17.58	4.77e-17	4.78e-17	4.79e-17	4.8e-17	4.8e-17	-0.573693	-0.573719	-0.573754	-0.573772	-0.57378
17.59	4.77e-17	4.78e-17	4.79e-17	4.8e-17	4.8e-17	-0.578673	-0.578699	-0.578734	-0.578751	-0.57876
17.6	4.77e-17	4.78e-17	4.79e-17	4.8e-17	4.8e-17	-0.583652	-0.583678	-0.583713	-0.583731	-0.583739
17.61	4.77e-17	4.78e-17	4.79e-17	4.8e-17	4.8e-17	-0.588631	-0.588658	-0.588692	-0.58871	-0.588719
17.62	4.77e-17	4.78e-17	4.79e-17	4.8e-17	4.8e-17	-0.593611	-0.593637	-0.593672	-0.593689	-0.593698
17.63	4.77e-17	4.78e-17	4.79e-17	4.8e-17	4.8e-17	-0.59859	-0.598616	-0.598651	-0.598669	-0.598677
17.64	4.77e-17	4.78e-17	4.79e-17	4.8e-17	4.8e-17	-0.603569	-0.603596	-0.603631	-0.603648	-0.603657
17.65	4.77e-17	4.78e-17	4.79e-17	4.8e-17	4.8e-17	-0.608549	-0.608575	-0.60861	-0.608628	-0.608636
17.66	4.77e-17	4.78e-17	4.79e-17	4.8e-17	4.8e-17	-0.613528	-0.613554	-0.613589	-0.613607	-0.613616
17.67	4.77e-17	4.78e-17	4.79e-17	4.8e-17	4.8e-17	-0.618508	-0.618534	-0.618569	-0.618586	-0.618595
17.68	4.77e-17	4.78e-17	4.79e-17	4.8e-17	4.8e-17	-0.623487	-0.623513	-0.623548	-0.623566	-0.623574
17.69	4.77e-17	4.78e-17	4.79e-17	4.8e-17	4.8e-17	-0.628466	-0.628493	-0.628528	-0.628545	-0.628554
17.7	4.77e-17	4.78e-17	4.79e-17	4.8e-17	4.8e-17	-0.633446	-0.633472	-0.633507	-0.633524	-0.633533
17.71	4.77e-17	4.78e-17	4.79e-17	4.8e-17	4.8e-17	-0.638425	-0.638451	-0.638486	-0.638504	-0.638513
17.72	4.77e-17	4.78e-17	4.79e-17	4.8e-17	4.8e-17	-0.643405	-0.643431	-0.643466	-0.643483	-0.643492
17.73	4.77e-17	4.78e-17	4.79e-17	4.8e-17	4.8e-17	-0.648384	-0.64841	-0.648445	-0.648463	-0.648471
17.74	4.77e-17	4.78e-17	4.79e-17	4.8e-17	4.8e-17	-0.653363	-0.65339	-0.653425	-0.653442	-0.653451
17.75	4.77e-17	4.78e-17	4.79e-17	4.8e-17	4.8e-17	-0.658343	-0.658369	-0.658404	-0.658421	-0.65843
17.76	4.77e-17	4.78e-17	4.79e-17	4.8e-17	4.8e-17	-0.663322	-0.663348	-0.663383	-0.663401	-0.66341
17.77	4.77e-17	4.78e-17	4.79e-17	4.8e-17	4.8e-17	-0.668302	-0.668328	-0.668363	-0.66838	-0.668389
17.78	4.77e-17	4.78e-17	4.79e-17	4.8e-17	4.8e-17	-0.673281	-0.673307	-0.673342	-0.67336	-0.673368
17.79	4.77e-17	4.78e-17	4.79e-17	4.8e-17	4.8e-17	-0.67826	-0.678287	-0.678322	-0.678339	-0.678348
17.8	4.77e-17	4.78e-17	4.79e-17	4.8e-17	4.8e-17	-0.68324	-0.683266	-0.683301	-0.683318	-0.683327
17.81	4.77e-17	4.78e-17	4.79e-17	4.8e-17	4.8e-17	-0.688219	-0.688245	-0.68828	-0.688298	-0.688307
17.82	4.77e-17	4.78e-17	4.79e-17	4.8e-17	4.8e-17	-0.693199	-0.693225	-0.69326	-0.693277	-0.693286
17.83	4.77e-17	4.78e-17	4.79e-17	4.8e-17	4.8e-17	-0.698178	-0.698204	-0.698239	-0.698257	-0.698265
17.84	4.77e-17	4.78e-17	4.79e-17	4.8e-17	4.8e-17	-0.703157	-0.703184	-0.703219	-0.703236	-0.703245
17.85	4.77e-17	4.78e-17	4.79e-17	4.8e-17	4.8e-17	-0.708137	-0.708163	-0.708198	-0.708215	-0.708224
17.86	4.77e-17	4.78e-17	4.79e-17	4.8e-17	4.8e-17	-0.713116	-0.713142	-0.713177	-0.713195	-0.713204
17.87	4.77e-17	4.78e-17	4.79e-17	4.8e-17	4.8e-17	-0.718096	-0.718122	-0.718157	-0.718174	-0.718183
17.88	4.77e-17	4.78e-17	4.79e-17	4.8e-17	4.8e-17	-0.723075	-0.723101	-0.723136	-0.723154	-0.723162
17.89	4.77e-17	4.78e-17	4.79e-17	4.8e-17	4.8e-17	-0.728054	-0.728081	-0.728115	-0.728133	-0.728142
17.9	4.77e-17	4.78e-17	4.79e-17	4.8e-17	4.8e-17	-0.733034	-0.73306	-0.733095	-0.733112	-0.733121
17.91	4.77e-17	4.78e-17	4.79e-17	4.8e-17	4.8e-17	-0.738013	-0.738039	-0.738074	-0.738092	-0.7381
17.92	4.77e-17	4.78e-17	4.79e-17	4.8e-17	4.8e-17	-0.742993	-0.743019	-0.743054	-0.743071	-0.74308
17.93	4.77e-17	4.78e-17	4.79e-17	4.8e-17	4.8e-17	-0.747972	-0.747998	-0.748033	-0.748051	-0.748059
17.94	4.77e-17	4.78e-17	4.79e-17	4.8e-17	4.8e-17	-0.752951	-0.752978	-0.753012	-0.75303	-0.753039
17.95	4.77e-17	4.78e-17	4.79e-17	4.8e-17	4.8e-17	-0.757931	-0.757957	-0.757992	-0.758009	-0.758018
17.96	4.77e-17	4.78e-17	4.79e-17	4.8e-17	4.8e-17	-0.76291	-0.762936	-0.762971	-0.762989	-0.762997
17.97	4.77e-17	4.78e-17	4.79e-17	4.8e-17	4.8e-17	-0.767889	-0.767916	-0.767951	-0.767968	-0.767977
17.98	4.77e-17	4.78e-17	4.79e-17	4.8e-17	4.8e-17	-0.772869	-0.772895	-0.77293	-0.772948	-0.772956
17.99	4.77e-17	4.78e-17	4.79e-17	4.8e-17	4.8e-17	-0.777848	-0.777874	-0.777909	-0.777927	-0.777936
18	4.77e-17	4.78e-17	4.79e-17	4.8e-17	4.8e-17	-0.782828	-0.782854	-0.782889	-0.782906	-0.782915
18.01	4.77e-17	4.78e-17	4.79e-17	4.8e-17	4.8e-17	-0.787807	-0.787833	-0.787868	-0.787886	-0.787894
18.02	4.77e-17	4.78e-17	4.79e-17	4.8e-17	4.8e-17	-0.792786	-0.792813	-0.792848	-0.792865	-0.792874
18.03	4.77e-17	4.78e-17	4.79e-17	4.8e-17	4.8e-17	-0.797766	-0.797792	-0.797827	-0.797844	-0.797853
18.04	4.77e-17	4.78e-17	4.79e-17	4.8e-17	4.8e-17	-0.802745	-0.802771	-0.802806	-0.802824	-0.802833
18.05	4.77e-17	4.78e-17	4.79e-17	4.8e-17	4.8e-17	-0.807725	-0.807751	-0.807786	-0.807803	-0.807812
18.06	4.77e-17	4.78e-17	4.79e-17	4.8e-17	4.8e-17	-0.812704	-0.81273	-0.812765	-0.812783	-0.812791
18.07	4.77e-17	4.78e-17	4.79e-17	4.8e-17	4.8e-17	-0.817683	-0.81771	-0.817745	-0.817762	-0.817771
18.08	4.77e-17	4.78e-17	4.79e-17	4.8e-17	4.8e-17	-0.822663	-0.822689	-0.822724	-0.822741	-0.82275
18.09	4.77e-17	4.78e-17	4.79e-17	4.8e-17	4.8e-17	-0.827642	-0.827668	-0.827703	-0.827721	-0.82773
18.1	4.77e-17	4.78e-17	4.79e-17	4.8e-17	4.8e-17	-0.832622	-0.832648	-0.832683	-0.8327	-0.832709
18.11	4.77e-17	4.78e-17	4.79e-17	4.8e-17	4.8e-17	-0.837601	-0.837627	-0.837662	-0.83768	-0.837688
18.12	4.77e-17	4.78e-17	4.79e-17	4.8e-17	4.8e-17	-0.84258	-0.842607	-0.842642	-0.842659	-0.842668
18.13	4.77e-17	4.78e-17	4.79e-17	4.8e-17	4.8e-17	-0.84756	-0.847586	-0.847621	-0.847638	-0.847647
18.14	4.77e-17	4.78e-17	4.79e-17	4.8e-17	4.8e-17	-0.852539	-0.852565	-0.8526	-0.852618	-0.852627
18.15	4.77e-17	4.78e-17	4.79e-17	4.8e-17	4.8e-17	-0.857519	-0.857545	-0.85758	-0.857597	-0.857606
18.16	4.77e-17	4.78e-17	4.79e-17	4.8e-17	4.8e-17	-0.862498	-0.862524	-0.862559	-0.862577	-0.862585
18.17	4.77e-17	4.78e-17	4.79e-17	4.8e-17	4.8e-17	-0.867477	-0.867504	-0.867539	-0.867556	-0.867565
18.18	4.77e-17	4.78e-17	4.79e-17	4.8e-17	4.8e-17	-0.872457	-0.872483	-0.872518	-0.872535	-0.872544
18.19	4.77e-17	4.78e-17	4.79e-17	4.8e-17	4.8e-17	-0.877436	-0.877462	-0.877497	-0.877515	-0.877524
18.2	4.77e-17	4.78e-17	4.79e-17	4.8e-17	4.8e-17	-0.882416	-0.882442	-0.882477	-0.882494	-0.882503
18.21	4.77e-17	4.78e-17	4.79e-17	4.8e-17	4.8e-17	-0.887395	-0.887421	-0.887456	-0.887474	-0.887482
18.22	4.77e-17	4.78e-17	4.79e-17	4.8e-17	4.8e-17	-0.892374	-0.892401	-0.892435	-0.892453	-0.892462
18.23	4.77e-17	4.78e-17	4.79e-17	4.8e-17	4.8e-17	-0.897354	-0.89738	-0.897415	-0.897432	-0.897441
18.24	4.77e-17	4.78e-17	4.79e-17	4.8e-17	4.8e-17	-0.902333	-0.902359	-0.902394	-0.902412	-0.90242
18.25	4.77e-17	4.78e-17	4.79e-17	4.8e-17	4.8e-17	-0.907313	-0.907339	-0.907374	-0.907391	-0.9074
18.26	4.77e-17	4.78e-17	4.79e-17	4.8e-17	4.8e-17	-0.912292	-0.912318	-0.912353	-0.912371	-0.912379
18.27	4.77e-17	4.78e-17	4.79e-17	4.8e-17	4.8e-17	-0.917271	-0.917298	-0.917332	-0.91735	-0.917359
18.28	4.77e-17	4.78e-17	4.79e-17	4.8e-17	4.8e-17	-0.922251	-0.922277	-0.922312	-0.922329	-0.922338
18.29	4.77e-17	4.78e-17	4.79e-17	4.8e-17	4.8e-17	-0.92723	-0.927256	-0.927291	-0.927309	-0.927317
18.3	4.77e-17	4.78e-17	4.79e-17	4.8e-17	4.8e-17	-0.932209	-0.932236	-0.932271	-0.932288	-0.932297
18.31	4.77e-17	4.78e-17	4.79e-17	4.8e-17	4.8e-17	-0.937189	-0.937215	-0.93725	-0.937267	-0.937276
18.32	4.77e-17	4.78e-17	4.79e-17	4.8e-17	4.8e-17	-0.942168	-0.942194	-0.942229	-0.942247	-0.942256
18.33	4.77e-17	4.78e-17	4.79e-17	4.8e-17	4.8e-17	-0.947148	-0.947174	-0.947209	-0.947226	-0.947235
18.34	4.77e-17	4.78e-17	4.79e-17	4.8e-17	4.8e-17	-0.952127	-0.952153	-0.952188	-0.952206	-0.952214
18.35	4.77e-17	4.78e-17	4.79e-17	4.8e-17	4.8e-17	-0.957106	-0.957133	-0.957168	-0.957185	-0.957194
18.36	4.77e-17	4.78e-17	4.79e-17	4.8e-17	4.8e-17	-0.962086	-0.962112	-0.962147	-0.962164	-0.962173
18.37	4.77e-17	4.78e-17	4.79e-17	4.8e-17	4.8e-17	-0.967065	-0.967091	-0.967126	-0.967144	-0.967153
18.38	4.77e-17	4.78e-17	4.79e-17	4.8e-17	4.8e-17	-0.972045	-0.972071	-0.972106	-0.972123	-0.972132
18.39	4.77e-17	4.78e-17	4.79e-17	4.8e-17	4.8e-17	-0.977024	-0.97705	-0.977085	-0.977103	-0.977111
18.4	4.77e-17	4.78e-17	4.79e-17	4.8e-17	4.8e-17	-0.982003	-0.98203	-0.982065	-0.982082	-0.982091
18.41	4.77e-17	4.78e-17	4.79e-17	4.8e-17	4.8e-17	-0.986983	-0.987009	-0.987044	-0.987061	-0.98707
18.42	4.77e-17	4.78e-17	4.79e-17	4.8e-17	4.8e-17	-0.991962	-0.991988	-0.992023	-0.992041	-0.99205
18.43	4.77e-17	4.78e-17	4.79e-17	4.8e-17	4.8e-17	-0.996942	-0.996968	-0.997003	-0.99702	-0.997029
18.44	4.77e-17	4.78e-17	4.79e-17	4.8e-17	4.8e-17	-1.00192	-1.00195	-1.00198	-1.002	-1.00201
18.45	4.77e-17	4.78e-17	4.79e-17	4.8e-17	4.8e-17	-1.0069	-1.00693	-1.00696	-1.00698	-1.00699
18.46	4.77e-17	4.78e-17	4.79e-17	4.8e-17	4.8e-17	-1.01188	-1.01191	-1.01194	-1.01196	-1.01197
18.47	4.77e-17	4.78e-17	4.79e-17	4.8e-17	4.8e-17	-1.01686	-1.01689	-1.01692	-1.01694	-1.01695
18.48	4.77e-17	4.78e-17	4.79e-17	4.8e-17	4.8e-17	-1.02184	-1.02186	-1.0219	-1.02192	-1.02193
18.49	4.77e-17	4.78e-17	4.79e-17	4.8e-17	4.8e-17	-1.02682	-1.02684	-1.02688	-1.0269	-1.02691
18.5	4.77e-17	4.78e-17	4.79e-17	4.8e-17	4.8e-17	-1.0318	-1.03182	-1.03186	-1.03188	-1.03188
18.51	4.77e-17	4.78e-17	4.79e-17	4.8e-17	4.8e-17	-1.03678	-1.0368	-1.03684	-1.03686	-1.03686
18.52	4.77e-17	4.78e-17	4.79e-17	4.8e-17	4.8e-17	-1.04176	-1.04178	-1.04182	-1.04183	-1.04184
18.53	4.77e-17	4.78e-17	4.79e-17	4.8e-17	4.8e-17	-1.04674	-1.04676	-1.0468	-1.04681	-1.04682
18.54	4.77e-17	4.78e-17	4.79e-17	4.8e-17	4.8e-17	-1.05171	-1.05174	-1.05178	-1.05179	-1.0518
18.55	4.77e-17	4.78e-17	4.79e-17	4.8e-17	4.8e-17	-1.05669	-1.05672	-1.05676	-1.05677	-1.05678
18.56	4.77e-17	4.78e-17	4.79e-17	4.8e-17	4.8e-17	-1.06167	-1.0617	-1.06173	-1.06175	-1.06176
18.57	4.77e-17	4.78e-17	4.79e-17	4.8e-17	4.8e-17	-1.06665	-1.06668	-1.06671	-1.06673	-1.06674
18.58	4.77e-17	4.78e-17	4.79e-17	4.8e-17	4.8e-17	-1.07163	-1.07166	-1.07169	-1.07171	-1.07172
18.59	4.77e-17	4.78e-17	4.79e-17	4.8e-17	4.8e-17	-1.07661	-1.07664	-1.07667	-1.07669	-1.0767
18.6	4.77e-17	4.78e-17	4.79e-17	4.8e-17	4.8e-17	-1.08159	-1.08162	-1.08165	-1.08167	-1.08168
18.61	4.77e-17	4.78e-17	4.79e-17	4.8e-17	4.8e-17	-1.08657	-1.0866	-1.08663	-1.08665	-1.08666
18.62	4.77e-17	4.78e-17	4.79e-17	4.8e-17	4.8e-17	-1.09155	-1.09158	-1.09161	-1.09163	-1.09164
18.63	4.77e-17	4.78e-17	4.79e-17	4.8e-17	4.8e-17	-1.09653	-1.09656	-1.09659	-1.09661	-1.09662
18.64	4.77e-17	4.78e-17	4.79e-17	4.8e-17	4.8e-17	-1.10151	-1.10154	-1.10157	-1.10159	-1.1016
18.65	4.77e-17	4.78e-17	4.79e-17	4.8e-17	4.8e-17	-1.10649	-1.10651	-1.10655	-1.10657	-1.10658
18.66	4.77e-17	4.78e-17	4.79e-17	4.8e-17	4.8e-17	-1.11147	-1.11149	-1.11153	-1.11155	-1.11156
18.67	4.77e-17	4.78e-17	4.79e-17	4.8e-17	4.8e-17	-1.11645	-1.11647	-1.11651	-1.11653	-1.11653
18.68	4.77e-17	4.78e-17	4.79e-17	4.8e-17	4.8e-17	-1.12143	-1.12145	-1.12149	-1.12151	-1.12151
18.69	4.77e-17	4.78e-17	4.79e-17	4.8e-17	4.8e-17	-1.12641	-1.12643	-1.12647	-1.12648	-1.12649
18.7	4.77e-17	4.78e-17	4.79e-17	4.8e-17	4.8e-17	-1.13139	-1.13141	-1.13145	-1.13146	-1.13147
18.71	4.77e-17	4.78e-17	4.79e-17	4.8e-17	4.8e-17	-1.13636	-1.13639	-1.13643	-1.13644	-1.13645
18.72	4.77e-17	4.78e-17	4.79e-17	4.8e-17	4.8e-17	-1.14134	-1.14137	-1.14141	-1.14142	-1.14143
18.73	4.77e-17	4.78e-17	4.79e-17	4.8e-17	4.8e-17	-1.14632	-1.14635	-1.14638	-1.1464	-1.14641
18.74	4.77e-17	4.78e-17	4.79e-17	4.8e-17	4.8e-17	-1.1513	-1.15133	-1.15136	-1.15138	-1.15139
18.75	4.77e-17	4.78e-17	4.79e-17	4.8e-17	4.8e-17	-1.15628	-1.15631	-1.15634	-1.15636	-1.15637
18.76	4.77e-17	4.78e-17	4.79e-17	4.8e-17	4.8e-17	-1.16126	-1.16129	-1.16132	-1.16134	-1.16135
18.77	4.77e-17	4.78e-17	4.79e-17	4.8e-17	4.8e-17	-1.16624	-1.16627	-1.1663	-1.16632	-1.16633
18.78	4.77e-17	4.78e-17	4.79e-17	4.8e-17	4.8e-17	-1.17122	-1.17125	-1.17128	-1.1713	-1.17131
18.79	4.77e-17	4.78e-17	4.79e-17	4.8e-17	4.8e-17	-1.1762	-1.17623	-1.17626	-1.17628	-1.17629
18.8	4.77e-17	4.78e-17	4.79e-17	4.8e-17	4.8e-17	-1.18118	-1.18121	-1.18124	-1.18126	-1.18127
18.81	4.77e-17	4.78e-17	4.79e-17	4.8e-17	4.8e-17	-1.18616	-1.18618	-1.18622	-1.18624	-1.18625
18.82	4.77e-17	4.78e-17	4.79e-17	4.8e-17	4.8e-17	-1.19114	-1.19116	-1.1912	-1.19122	-1.19123
18.83	4.77e-17	4.78e-17	4.79e-17	4.8e-17	4.8e-17	-1.19612	-1.19614	-1.19618	-1.1962	-1.1962
18.84	4.77e-17	4.78e-17	4.79e-17	4.8e-17	4.8e-17	-1.2011	-1.20112	-1.20116	-1.20118	-1.20118
18.85	4.77e-17	4.78e-17	4.79e-17	4.8e-17	4.8e-17	-1.20608	-1.2061	-1.20614	-1.20615	-1.20616
18.86	4.77e-17	4.78e-17	4.79e-17	4.8e-17	4.8e-17	-1.21106	-1.21108	-1.21112	-1.21113	-1.21114
18.87	4.77e-17	4.78e-17	4.79e-17	4.8e-17	4.8e-17	-1.21603	-1.21606	-1.2161	-1.21611	-1.21612
18.88	4.77e-17	4.78e-17	4.79e-17	4.8e-17	4.8e-17	-1.22101	-1.22104	-1.22108	-1.22109	-1.2211
18.89	4.77e-17	4.78e-17	4.79e-17	4.8e-17	4.8e-17	-1.22599	-1.22602	-1.22605	-1.22607	-1.22608
18.9	4.77e-17	4.78e-17	4.79e-17	4.8e-17	4.8e-17	-1.23097	-1.231	-1.23103	-1.23105	-1.23106
18.91	4.77e-17	4.78e-17	4.79e-17	4.8e-17	4.8e-17	-1.23595	-1.23598	-1.23601	-1.23603	-1.23604
18.92	4.77e-17	4.78e-17	4.79e-17	4.8e-17	4.8e-17	-1.24093	-1.24096	-1.24099	-1.24101	-1.24102
18.93	4.77e-17	4.78e-17	4.79e-17	4.8e-17	4.8e-17	-1.24591	-1.24594	-1.24597	-1.24599	-1.246
18.94	4.77e-17	4.78e-17	4.79e-17	4.8e-17	4.8e-17	-1.25089	-1.25092	-1.25095	-1.25097	-1.25098
18.95	4.77e-17	4.78e-17	4.79e-17	4.8e-17	4.8e-17	-1.25587	-1.2559	-1.25593	-1.25595	-1.25596
18.96	4.77e-17	4.78e-17	4.79e-17	4.8e-17	4.8e-17	-1.26085	-1.26088	-1.26091	-1.26093	-1.26094
18.97	4.77e-17	4.78e-17	4.79e-17	4.8e-17	4.8e-17	-1.26583	-1.26586	-1.26589	-1.26591	-1.26592
18.98	4.77e-17	4.78e-17	4.79e-17	4.8e-17	4.8e-17	-1.27081	-1.27083	-1.27087	-1.27089	-1.2709
18.99	4.77e-17	4.78e-17	4.79e-17	4.8e-17	4.8e-17	-1.27579	-1.27581	-1.27585	-1.27587	-1.27588
19	4.77e-17	4.78e-17	4.79e-17	4.8e-17	4.8e-17	-1.28077	-1.28079	-1.28083	-1.28085	-1.28085
19.01	4.77e-17	4.78e-17	4.79e-17	4.8e-17	4.8e-17	-1.28575	-1.28577	-1.28581	-1.28583	-1.28583
19.02	4.77e-17	4.78e-17	4.79e-17	4.8e-17	4.8e-17	-1.29073	-1.29075	-1.29079	-1.2908	-1.29081
19.03	4.77e-17	4.78e-17	4.79e-17	4.8e-17	4.8e-17	-1.29571	-1.29573	-1.29577	-1.29578	-1.29579
19.04	4.77e-17	4.78e-17	4.79e-17	4.8e-17	4.8e-17	-1.30068	-1.30071	-1.30075	-1.30076	-1.30077
19.05	4.77e-17	4.78e-17	4.79e-17	4.8e-17	4.8e-17	-1.30566	-1.30569	-1.30573	-1.30574	-1.30575
19.06	4.77e-17	4.78e-17	4.79e-17	4.8e-17	4.8e-17	-1.31064	-1.31067	-1.3107	-1.31072	-1.31073
19.07	4.77e-17	4.78e-17	4.79e-17	4.8e-17	4.8e-17	-1.31562	-1.31565	-1.31568	-1.3157	-1.31571
19.08	4.77e-17	4.78e-17	4.79e-17	4.8e-17	4.8e-17	-1.3206	-1.32063	-1.32066	-1.32068	-1.32069
19.09	4.77e-17	4.78e-17	4.79e-17	4.8e-17	4.8e-17	-1.32558	-1.32561	-1.32564	-1.32566	-1.32567
19.1	4.77e-17	4.78e-17	4.79e-17	4.8e-17	4.8e-17	-1.33056	-1.33059	-1.33062	-1.33064	-1.33065
19.11	4.77e-17	4.78e-17	4.79e-17	4.8e-17	4.8e-17	-1.33554	-1.33557	-1.3356	-1.33562	-1.33563
19.12	4.77e-17	4.78e-17	4.79e-17	4.8e-17	4.8e-17	-1.34052	-1.34055	-1.34058	-1.3406	-1.34061
19.13	4.77e-17	4.78e-17	4.79e-17	4.8e-17	4.8e-17	-1.3455	-1.34553	-1.34556	-1.34558	-1.34559
19.14	4.77e-17	4.78e-17	4.79e-17	4.8e-17	4.8e-17	-1.35048	-1.3505	-1.35054	-1.35056	-1.35057
19.15	4.77e-17	4.78e-17	4.79e-17	4.8e-17	4.8e-17	-1.35546	-1.35548	-1.35552	-1.35554	-1.35555
19.16	4.77e-17	4.78e-17	4.79e-17	4.8e-17	4.8e-17	-1.36044	-1.36046	-1.3605	-1.36052	-1.36052
19.17	4.77e-17	4.78e-17	4.79e-17	4.8e-17	4.8e-17	-1.36542	-1.36544	-1.36548	-1.3655	-1.3655
19.18	4.77e-17	4.78e-17	4.79e-17	4.8e-17	4.8e-17	-1.3704	-1.37042	-1.37046	-1.37047	-1.37048
19.19	4.77e-17	4.78e-17	4.79e-17	4.8e-17	4.8e-17	-1.37538	-1.3754	-1.37544	-1.37545	-1.37546
19.2	4.77e-17	4.78e-17	4.79e-17	4.8e-17	4.8e-17	-1.38035	-1.38038	-1.38042	-1.38043	-1.38044
19.21	4.77e-17	4.78e-17	4.79e-17	4.8e-17	4.8e-17	-1.38533	-1.38536	-1.3854	-1.38541	-1.38542
19.22	4.77e-17	4.78e-17	4.79e-17	4.8e-17	4.8e-17	-1.39031	-1.39034	-1.39037	-1.39039	-1.3904
19.23	4.77e-17	4.78e-17	4.79e-17	4.8e-17	4.8e-17	-1.39529	-1.39532	-1.39535	-1.39537	-1.39538
19.24	4.77e-17	4.78e-17	4.79e-17	4.8e-17	4.8e-17	-1.40027	-1.4003	-1.40033	-1.40035	-1.40036
19.25	4.77e-17	4.78e-17	4.79e-17	4.8e-17	4.8e-17	-1.40525	-1.40528	-1.40531	-1.40533	-1.40534
19.26	4.77e-17	4.78e-17	4.79e-17	4.8e-17	4.8e-17	-1.41023	-1.41026	-1.41029	-1.41031	-1.41032
19.27	4.77e-17	4.78e-17	4.79e-17	4.8e-17	4.8e-17	-1.41521	-1.41524	-1.41527	-1.41529	-1.4153
19.28	4.77e-17	4.78e-17	4.79e-17	4.8e-17	4.8e-17	-1.42019	-1.42022	-1.42025	-1.42027	-1.42028
19.29	4.77e-17	4.78e-17	4.79e-17	4.8e-17	4.8e-17	-1.42517	-1.4252	-1.42523	-1.42525	-1.42526
19.3	4.77e-17	4.78e-17	4.79e-17	4.8e-17	4.8e-17	-1.43015	-1.43018	-1.43021	-1.43023	-1.43024
19.31	4.77e-17	4.78e-17	4.79e-17	4.8e-17	4.8e-17	-1.43513	-1.43515	-1.43519	-1.43521	-1.43522
19.32	4.77e-17	4.78e-17	4.79e-17	4.8e-17	4.8e-17	-1.44011	-1.44013	-1.44017	-1.44019	-1.4402
19.33	4.77e-17	4.78e-17	4.79e-17	4.8e-17	4.8e-17	-1.44509	-1.44511	-1.44515	-1.44517	-1.44517
19.34	4.77e-17	4.78e-17	4.79e-17	4.8e-17	4.8e-17	-1.45007	-1.45009	-1.45013	-1.45015	-1.45015
19.35	4.77e-17	4.78e-17	4.79e-17	4.8e-17	4.8e-17	-1.45505	-1.45507	-1.45511	-1.45512	-1.45513
19.36	4.77e-17	4.78e-17	4.79e-17	4.8e-17	4.8e-17	-1.46003	-1.46005	-1.46009	-1.4601	-1.46011
19.37	4.77e-17	4.78e-17	4.79e-17	4.8e-17	4.8e-17	-1.465	-1.46503	-1.46507	-1.46508	-1.46509
19.38	4.77e-17	4.78e-17	4.79e-17	4.8e-17	4.8e-17	-1.46998	-1.47001	-1.47005	-1.47006	-1.47007
19.39	4.77e-17	4.78e-17	4.79e-17	4.8e-17	4.8e-17	-1.47496	-1.47499	-1.47502	-1.47504	-1.47505
19.4	4.77e-17	4.78e-17	4.79e-17	4.8e-17	4.8e-17	-1.47994	-1.47997	-1.48	-1.48002	-1.48003
19.41	4.77e-17	4.78e-17	4.79e-17	4.8e-17	4.8e-17	-1.48492	-1.48495	-1.48498	-1.485	-1.48501
19.42	4.77e-17	4.78e-17	4.79e-17	4.8e-17	4.8e-17	-1.4899	-1.48993	-1.48996	-1.48998	-1.48999
19.43	4.77e-17	4.78e-17	4.79e-17	4.8e-17	4.8e-17	-1.49488	-1.49491	-1.49494	-1.49496	-1.49497
19.44	4.77e-17	4.78e-17	4.79e-17	4.8e-17	4.8e-17	-1.49986	-1.49989	-1.49992	-1.49994	-1.49995
19.45	4.77e-17	4.78e-17	4.79e-17	4.8e-17	4.8e-17	-1.50484	-1.50487	-1.5049	-1.50492	-1.50493
19.46	4.77e-17	4.78e-17	4.79e-17	4.8e-17	4.8e-17	-1.50982	-1.50985	-1.50988	-1.5099	-1.50991
19.47	4.77e-17	4.78e-17	4.79e-17	4.8e-17	4.8e-17	-1.5148	-1.51482	-1.51486	-1.51488	-1.51489
19.48	4.77e-17	4.78e-17	4.79e-17	4.8e-17	4.8e-17	-1.51978	-1.5198	-1.51984	-1.51986	-1.51987
19.49	4.77e-17	4.78e-17	4.79e-17	4.8e-17	4.8e-17	-1.52476	-1.52478	-1.52482	-1.52484	-1.52484
19.5	4.77e-17	4.78e-17	4.79e-17	4.8e-17	4.8e-17	-1.52974	-1.52976	-1.5298	-1.52982	-1.52982
19.51	4.77e-17	4.78e-17	4.79e-17	4.8e-17	4.8e-17	-1.53472	-1.53474	-1.53478	-1.53479	-1.5348
19.52	4.77e-17	4.78e-17	4.79e-17	4.8e-17	4.8e-17	-1.5397	-1.53972	-1.53976	-1.53977	-1.53978
19.53	4.77e-17	4.78e-17	4.79e-17	4.8e-17	4.8e-17	-1.54467	-1.5447	-1.54474	-1.54475	-1.54476
19.54	4.77e-17	4.78e-17	4.79e-17	4.8e-17	4.8e-17	-1.54965	-1.54968	-1.54972	-1.54973	-1.54974
19.55	4.77e-17	4.78e-17	4.79e-17	4.8e-17	4.8e-17	-1.55463	-1.55466	-1.55469	-1.55471	-1.55472
19.56	4.77e-17	4.78e-17	4.79e-17	4.8e-17	4.8e-17	-1.55961	-1.55964	-1.55967	-1.55969	-1.5597
19.57	4.77e-17	4.78e-17	4.79e-17	4.8e-17	4.8e-17	-1.56459	-1.56462	-1.56465	-1.56467	-1.56468
19.58	4.77e-17	4.78e-17	4.79e-17	4.8e-17	4.8e-17	-1.56957	-1.5696	-1.56963	-1.56965	-1.56966
19.59	4.77e-17	4.78e-17	4.79e-17	4.8e-17	4.8e-17	-1.57455	-1.57458	-1.57461	-1.57463	-1.57464
19.6	4.77e-17	4.78e-17	4.79e-17	4.8e-17	4.8e-17	-1.57953	-1.57956	-1.57959	-1.57961	-1.57962
19.61	4.77e-17	4.78e-17	4.79e-17	4.8e-17	4.8e-17	-1.58451	-1.58454	-1.58457	-1.58459	-1.5846
19.62	4.77e-17	4.78e-17	4.79e-17	4.8e-17	4.8e-17	-1.58949	-1.58952	-1.58955	-1.58957	-1.58958
19.63	4.77e-17	4.78e-17	4.79e-17	4.8e-17	4.8e-17	-1.59447	-1.5945	-1.59453	-1.59455	-1.59456
19.64	4.77e-17	4.78e-17	4.79e-17	4.8e-17	4.8e-17	-1.59945	-1.59947	-1.59951	-1.59953	-1.59954
19.65	4.77e-17	4.78e-17	4.79e-17	4.8e-17	4.8e-17	-1.60443	-1.60445	-1.60449	-1.60451	-1.60452
19.66	4.77e-17	4.78e-17	4.79e-17	4.8e-17	4.8e-17	-1.60941	-1.60943	-1.60947	-1.60949	-1.60949
19.67	4.77e-17	4.78e-17	4.79e-17	4.8e-17	4.8e-17	-1.61439	-1.61441	-1.61445	-1.61447	-1.61447
19.68	4.77e-17	4.78e-17	4.79e-17	4.8e-17	4.8e-17	-1.61937	-1.61939	-1.61943	-1.61944	-1.61945
19.69	4.77e-17	4.78e-17	4.79e-17	4.8e-17	4.8e-17	-1.62435	-1.62437	-1.62441	-1.62442	-1.62443
19.7	4.77e-17	4.78e-17	4.79e-17	4.8e-17	4.8e-17	-1.62932	-1.62935	-1.62939	-1.6294	-1.62941
19.71	4.77e-17	4.78e-17	4.79e-17	4.8e-17	4.8e-17	-1.6343	-1.63433	-1.63437	-1.63438	-1.63439
19.72	4.77e-17	4.78e-17	4.79e-17	4.8e-17	4.8e-17	-1.63928	-1.63931	-1.63934	-1.63936	-1.63937
19.73	4.77e-17	4.78e-17	4.79e-17	4.8e-17	4.8e-17	-1.64426	-1.64429	-1.64432	-1.64434	-1.64435
19.74	4.77e-17	4.78e-17	4.79e-17	4.8e-17	4.8e-17	-1.64924	-1.64927	-1.6493	-1.64932	-1.64933
19.75	4.77e-17	4.78e-17	4.79e-17	4.8e-17	4.8e-17	-1.65422	-1.65425	-1.65428	-1.6543	-1.65431
19.76	4.77e-17	4.78e-17	4.79e-17	4.8e-17	4.8e-17	-1.6592	-1.65923	-1.65926	-1.65928	-1.65929
19.77	4.77e-17	4.78e-17	4.79e-17	4.8e-17	4.8e-17	-1.66418	-1.66421	-1.66424	-1.66426	-1.66427
19.78	4.77e-17	4.78e-17	4.79e-17	4.8e-17	4.8e-17	-1.66916	-1.66919	-1.66922	-1.66924	-1.66925
19.79	4.77e-17	4.78e-17	4.79e-17	4.8e-17	4.8e-17	-1.67414	-1.67417	-1.6742	-1.67422	-1.67423
19.8	4.77e-17	4.78e-17	4.79e-17	4.8e-17	4.8e-17	-1.67912	-1.67914	-1.67918	-1.6792	-1.67921
19.81	4.77e-17	4.78e-17	4.79e-17	4.8e-17	4.8e-17	-1.6841	-1.68412	-1.68416	-1.68418	-1.68419
19.82	4.77e-17	4.78e-17	4.79e-17	4.8e-17	4.8e-17	-1.68908	-1.6891	-1.68914	-1.68916	-1.68916
19.83	4.77e-17	4.78e-17	4.79e-17	4.8e-17	4.8e-17	-1.69406	-1.69408	-1.69412	-1.69414	-1.69414
19.84	4.77e-17	4.78e-17	4.79e-17	4.8e-17	4.8e-17	-1.69904	-1.69906	-1.6991	-1.69911	-1.69912
19.85	4.77e-17	4.78e-17	4.79e-17	4.8e-17	4.8e-17	-1.70402	-1.70404	-1.70408	-1.70409	-1.7041
19.86	4.77e-17	4.78e-17	4.79e-17	4.8e-17	4.8e-17	-1.70899	-1.70902	-1.70906	-1.70907	-1.70908
19.87	4.77e-17	4.78e-17	4.79e-17	4.8e-17	4.8e-17	-1.71397	-1.714	-1.71404	-1.71405	-1.71406
19.88	4.77e-17	4.78e-17	4.79e-17	4.8e-17	4.8e-17	-1.71895	-1.71898	-1.71901	-1.71903	-1.71904
19.89	4.77e-17	4.78e-17	4.79e-17	4.8e-17	4.8e-17	-1.72393	-1.72396	-1.72399	-1.72401	-1.72402
19.9	4.77e-17	4.78e-17	4.79e-17	4.8e-17	4.8e-17	-1.72891	-1.72894	-1.72897	-1.72899	-1.729
19.91	4.77e-17	4.78e-17	4.79e-17	4.8e-17	4.8e-17	-1.73389	-1.73392	-1.73395	-1.73397	-1.73398
19.92	4.77e-17	4.78e-17	4.79e-17	4.8e-17	4.8e-17	-1.73887	-1.7389	-1.73893	-1.73895	-1.73896
19.93	4.77e-17	4.78e-17	4.79e-17	4.8e-17	4.8e-17	-1.74385	-1.74388	-1.74391	-1.74393	-1.74394
19.94	4.77e-17	4.78e-17	4.79e-17	4.8e-17	4.8e-17	-1.74883	-1.74886	-1.74889	-1.74891	-1.74892
19.95	4.77e-17	4.78e-17	4.79e-17	4.8e-17	4.8e-17	-1.75381	-1.75384	-1.75387	-1.75389	-1.7539
19.96	4.77e-17	4.78e-17	4.79e-17	4.8e-17	4.8e-17	-1.75879	-1.75882	-1.75885	-1.75887	-1.75888
19.97	4.77e-17	4.78e-17	4.79e-17	4.8e-17	4.8e-17	-1.76377	-1.76379	-1.76383	-1.76385	-1.76386
19.98	4.77e-17	4.78e-17	4.79e-17	4.8e-17	4.8e-17	-1.76875	-1.76877	-1.76881	-1.76883	-1.76884
[truncated: 802 more rows]
