# Supplementary material for: Incomplete antiviral treatment may induce longer durations of viral shedding during SARS-CoV-2 infection
Source: Life Sci Alliance. 2021 Aug 3;4(10):e202101049. doi: 10.26508/lsa.202101049 (PMC8340032; doi:10.26508/lsa.202101049)
Supplement: Supplementary file 4 [file LSA-2021-01049_SdataFS2.xlsx]

## Sheet: FigS2_A(point)
Day	RM A	RM B	RM C	RM D	RM7	RM8	RM9	RM10	RM11	RM12
0
1	8.45484	7.1903	8.47158	8.38154	8.65365	6.87148	7.94392	8.31857	7.09849	8.01523
2
3	6.82431	5.5586	6.54926	6.20365	7.02051	5.79154	6.81815	7.16053	7.44818	6.92733
4
5	5.72128	4.9321	5.9128	6.42225
6
7					5.07076	3.99831	3.5487	4.85826	5.00392	3.61616

## Sheet: FigS2_A(line)
time	RM A	RM B	RM C	RM D	RM7	RM8	RM9	RM10	RM11	RM12
0	3.658	3.73233	3.66003	3.65966	3.65914	3.74107	3.62052	3.65333	3.66296	3.76667
0.01	3.62482	3.6991	3.62685	3.62648	3.62599	3.70787	3.58729	3.62016	3.62977	3.7336
0.02	3.61238	3.68648	3.61441	3.61405	3.61363	3.69535	3.57466	3.60774	3.6173	3.72147
0.03	3.6196	3.69339	3.62162	3.62128	3.62098	3.70242	3.58157	3.61499	3.62448	3.72915
0.04	3.64388	3.71724	3.6459	3.64557	3.64544	3.72648	3.60543	3.63932	3.64873	3.75395
0.05	3.68184	3.75471	3.68386	3.68357	3.68361	3.76418	3.6429	3.67735	3.68668	3.79247
0.06	3.73013	3.80245	3.73214	3.7319	3.73213	3.81214	3.69064	3.72571	3.73496	3.84127
0.07	3.78582	3.85758	3.78784	3.78765	3.78806	3.86749	3.74578	3.78148	3.79067	3.89745
0.08	3.84666	3.91783	3.84868	3.84854	3.84914	3.92796	3.80604	3.8424	3.85153	3.95872
0.09	3.91097	3.98156	3.913	3.91292	3.9137	3.9919	3.86978	3.90681	3.91588	4.02343
0.1	3.97761	4.0476	3.97964	3.97961	3.98058	4.05815	3.93584	3.97353	3.98256	4.09043
0.11	4.04576	4.11518	4.0478	4.04784	4.04898	4.12592	4.00343	4.04177	4.05076	4.15892
0.12	4.11492	4.18375	4.11696	4.11706	4.11837	4.19469	4.07202	4.11101	4.11996	4.22839
0.13	4.18472	4.25297	4.18676	4.18692	4.18841	4.2641	4.14126	4.1809	4.18981	4.29849
0.14	4.25494	4.32261	4.25698	4.25721	4.25886	4.33393	4.21092	4.25121	4.26009	4.369
0.15	4.32543	4.39253	4.32748	4.32777	4.32959	4.40403	4.28086	4.32178	4.33063	4.43977
0.16	4.39609	4.46261	4.39814	4.3985	4.40048	4.47429	4.35096	4.39253	4.40135	4.51071
0.17	4.46686	4.53281	4.46892	4.46933	4.47149	4.54467	4.42118	4.46339	4.47217	4.58175
0.18	4.5377	4.60307	4.53977	4.54024	4.54256	4.61511	4.49147	4.53432	4.54307	4.65285
0.19	4.60858	4.67337	4.61065	4.61119	4.61368	4.6856	4.5618	4.60529	4.614	4.724
0.2	4.67949	4.7437	4.68156	4.68217	4.68482	4.7561	4.63216	4.67628	4.68497	4.79516
0.21	4.75041	4.81404	4.75249	4.75315	4.75597	4.82662	4.70253	4.74729	4.75594	4.86633
0.22	4.82133	4.88437	4.82342	4.82414	4.82713	4.89713	4.77291	4.8183	4.82692	4.93751
0.23	4.89225	4.95471	4.89434	4.89513	4.89828	4.96764	4.84328	4.88931	4.89789	5.00867
0.24	4.96316	5.02503	4.96526	4.96611	4.96943	5.03814	4.91365	4.96031	4.96886	5.07983
0.25	5.03407	5.09533	5.03617	5.03708	5.04057	5.10862	4.98401	5.03131	5.03982	5.15097
0.26	5.10496	5.16562	5.10706	5.10804	5.11169	5.17907	5.05435	5.10228	5.11076	5.22208
0.27	5.17583	5.23588	5.17793	5.17898	5.18279	5.24951	5.12468	5.17324	5.18168	5.29317
0.28	5.24668	5.30611	5.24879	5.24989	5.25388	5.31991	5.19498	5.24418	5.25258	5.36423
0.29	5.3175	5.3763	5.31961	5.32078	5.32493	5.39027	5.26526	5.31509	5.32345	5.43525
0.3	5.38829	5.44645	5.39041	5.39164	5.39596	5.46059	5.33551	5.38598	5.39428	5.50623
0.31	5.45904	5.51655	5.46116	5.46245	5.46694	5.53085	5.40573	5.45682	5.46508	5.57715
0.32	5.52975	5.58659	5.53187	5.53323	5.53789	5.60105	5.4759	5.52762	5.53583	5.64801
0.33	5.6004	5.65656	5.60253	5.60395	5.60878	5.67118	5.54603	5.59837	5.60653	5.71879
0.34	5.671	5.72645	5.67313	5.67461	5.67961	5.74123	5.6161	5.66906	5.67717	5.78949
0.35	5.74152	5.79624	5.74365	5.74519	5.75037	5.81117	5.6861	5.73968	5.74772	5.86009
0.36	5.81196	5.86592	5.81409	5.81569	5.82104	5.88099	5.75602	5.81021	5.81819	5.93057
0.37	5.8823	5.93547	5.88443	5.88609	5.89162	5.95068	5.82585	5.88065	5.88856	6.00091
0.38	5.95252	6.00486	5.95465	5.95637	5.96208	6.0202	5.89557	5.95098	5.9588	6.07108
0.39	6.02261	6.07407	6.02473	6.02652	6.0324	6.08953	5.96516	6.02116	6.02891	6.14106
0.4	6.09253	6.14307	6.09465	6.0965	6.10256	6.15864	6.03461	6.09119	6.09884	6.21081
0.41	6.16227	6.21182	6.16438	6.16629	6.17254	6.22749	6.10388	6.16104	6.16857	6.2803
0.42	6.23179	6.28029	6.23389	6.23585	6.24229	6.29604	6.17294	6.23067	6.23808	6.34948
0.43	6.30105	6.34842	6.30314	6.30516	6.31178	6.36423	6.24176	6.30004	6.30732	6.4183
0.44	6.37	6.41615	6.37208	6.37416	6.38098	6.43202	6.31031	6.36912	6.37624	6.4867
0.45	6.43861	6.48343	6.44067	6.4428	6.44982	6.49932	6.37853	6.43785	6.4448	6.55461
0.46	6.50681	6.55019	6.50885	6.51104	6.51826	6.56607	6.44637	6.50618	6.51293	6.62196
0.47	6.57454	6.61633	6.57655	6.57879	6.58621	6.63219	6.51377	6.57404	6.58056	6.68864
0.48	6.64171	6.68178	6.6437	6.64598	6.65362	6.69756	6.58066	6.64136	6.64762	6.75458
0.49	6.70825	6.74641	6.7102	6.71253	6.72039	6.7621	6.64697	6.70805	6.71402	6.81964
0.5	6.77405	6.81013	6.77596	6.77833	6.78642	6.82566	6.71259	6.77401	6.77965	6.88371
0.51	6.83901	6.87279	6.84087	6.84328	6.8516	6.88813	6.77743	6.83914	6.8444	6.94665
0.52	6.903	6.93426	6.90481	6.90726	6.91581	6.94935	6.84137	6.90332	6.90815	7.0083
0.53	6.9659	6.99439	6.96765	6.97012	6.97891	7.00917	6.90429	6.96641	6.97076	7.06851
0.54	7.02754	7.053	7.02922	7.03172	7.04076	7.06743	6.96605	7.02826	7.03208	7.12711
0.55	7.08779	7.10994	7.08938	7.0919	7.1012	7.12394	7.0265	7.08872	7.09195	7.1839
0.56	7.14645	7.16503	7.14796	7.15048	7.16005	7.17853	7.08548	7.14762	7.15019	7.23872
0.57	7.20337	7.21809	7.20478	7.2073	7.21715	7.23102	7.14282	7.20478	7.20662	7.29138
0.58	7.25837	7.26895	7.25966	7.26218	7.2723	7.28125	7.19835	7.26003	7.26108	7.34171
0.59	7.31125	7.31744	7.31242	7.31493	7.32533	7.32906	7.25188	7.31319	7.31338	7.38955
0.6	7.36186	7.36343	7.36289	7.36538	7.37606	7.37429	7.30325	7.36407	7.36335	7.43476
0.61	7.41002	7.40677	7.41092	7.41338	7.42434	7.41684	7.35229	7.41253	7.41083	7.47721
0.62	7.4556	7.44738	7.45635	7.45878	7.47002	7.45662	7.39885	7.4584	7.45569	7.51683
0.63	7.49848	7.48519	7.49907	7.50146	7.51297	7.49356	7.4428	7.50158	7.49782	7.55355
0.64	7.53856	7.52015	7.53899	7.54133	7.55312	7.52764	7.48404	7.54197	7.53713	7.58737
0.65	7.57579	7.55227	7.57606	7.57835	7.59039	7.55887	7.52247	7.5795	7.57357	7.61831
0.66	7.61014	7.58158	7.61025	7.61249	7.62478	7.58731	7.55807	7.61415	7.60714	7.64642
0.67	7.64164	7.60816	7.64158	7.64376	7.6563	7.61303	7.59083	7.64593	7.63787	7.6718
0.68	7.67031	7.63209	7.6701	7.67223	7.685	7.63613	7.62077	7.6749	7.6658	7.69454
0.69	7.69626	7.6535	7.6959	7.69798	7.71096	7.65674	7.64795	7.70112	7.69103	7.7148
0.7	7.71959	7.67252	7.71909	7.72112	7.73429	7.67502	7.67247	7.72471	7.71367	7.73273
0.71	7.74042	7.68931	7.73979	7.74177	7.75514	7.6911	7.69443	7.74579	7.73388	7.74848
0.72	7.75892	7.70402	7.75815	7.76011	7.77364	7.70517	7.71398	7.76452	7.75178	7.76222
0.73	7.77522	7.71682	7.77434	7.77627	7.78996	7.71736	7.73126	7.78105	7.76756	7.77412
0.74	7.78951	7.72786	7.78852	7.79043	7.80427	7.72786	7.74642	7.79554	7.78136	7.78434
0.75	7.80194	7.73729	7.80086	7.80274	7.81673	7.7368	7.75964	7.80817	7.79337	7.79303
0.76	7.81267	7.74528	7.8115	7.81338	7.8275	7.74433	7.77107	7.81908	7.80372	7.80034
0.77	7.82186	7.75194	7.82061	7.82249	7.83673	7.75058	7.78087	7.82845	7.81258	7.8064
0.78	7.82964	7.75741	7.82833	7.83022	7.84458	7.75569	7.78917	7.8364	7.82008	7.81133
0.79	7.83617	7.76181	7.8348	7.8367	7.85117	7.75976	7.79613	7.84308	7.82637	7.81525
0.8	7.84156	7.76524	7.84013	7.84205	7.85663	7.7629	7.80188	7.84862	7.83156	7.81826
0.81	7.84592	7.7678	7.84445	7.8464	7.86107	7.7652	7.80652	7.85313	7.83576	7.82045
0.82	7.84936	7.76958	7.84785	7.84983	7.86461	7.76674	7.81018	7.85671	7.83907	7.8219
0.83	7.85198	7.77065	7.85043	7.85245	7.86733	7.76761	7.81294	7.85946	7.84158	7.8227
0.84	7.85385	7.77109	7.85228	7.85434	7.86931	7.76787	7.81491	7.86146	7.84338	7.8229
0.85	7.85506	7.77096	7.85346	7.85557	7.87063	7.76758	7.81615	7.86279	7.84454	7.82257
0.86	7.85566	7.77031	7.85404	7.85621	7.87136	7.76679	7.81675	7.86352	7.84512	7.82175
0.87	7.85573	7.7692	7.85409	7.85631	7.87155	7.76556	7.81676	7.86371	7.84518	7.82051
0.88	7.85531	7.76768	7.85366	7.85594	7.87127	7.76392	7.81625	7.86341	7.84477	7.81887
0.89	7.85446	7.76577	7.85279	7.85514	7.87055	7.76192	7.81527	7.86267	7.84394	7.81687
0.9	7.85321	7.76353	7.85153	7.85394	7.86945	7.75959	7.81386	7.86153	7.84274	7.81456
0.91	7.8516	7.76098	7.84992	7.8524	7.868	7.75696	7.81206	7.86004	7.84119	7.81196
0.92	7.84967	7.75814	7.84799	7.85054	7.86622	7.75407	7.80991	7.85823	7.83933	7.8091
0.93	7.84746	7.75505	7.84577	7.8484	7.86417	7.75093	7.80745	7.85612	7.83719	7.806
0.94	7.84497	7.75174	7.84329	7.84599	7.86185	7.74756	7.80471	7.85375	7.8348	7.80268
0.95	7.84226	7.74821	7.84057	7.84336	7.8593	7.744	7.8017	7.85114	7.83218	7.79917
0.96	7.83932	7.7445	7.83764	7.84051	7.85653	7.74025	7.79847	7.84832	7.82935	7.79548
0.97	7.83619	7.74061	7.83451	7.83746	7.85358	7.73634	7.79501	7.8453	7.82633	7.79163
0.98	7.83288	7.73657	7.83121	7.83424	7.85044	7.73228	7.79137	7.8421	7.82314	7.78763
0.99	7.82941	7.73238	7.82775	7.83087	7.84715	7.72808	7.78755	7.83874	7.8198	7.7835
1	7.8258	7.72806	7.82414	7.82734	7.84372	7.72375	7.78357	7.83523	7.81631	7.77925
1.01	7.82205	7.72363	7.8204	7.82369	7.84015	7.71931	7.77945	7.83159	7.8127	7.77489
1.02	7.81818	7.71909	7.81653	7.81992	7.83647	7.71476	7.77519	7.82783	7.80897	7.77042
1.03	7.8142	7.71444	7.81256	7.81604	7.83268	7.71012	7.77081	7.82395	7.80514	7.76586
1.04	7.81011	7.70971	7.80849	7.81206	7.82878	7.70539	7.76632	7.81998	7.80121	7.76122
1.05	7.80594	7.7049	7.80433	7.80799	7.8248	7.70059	7.76173	7.81591	7.79719	7.7565
1.06	7.80168	7.70001	7.80008	7.80383	7.82074	7.69571	7.75706	7.81176	7.79308	7.75172
1.07	7.79735	7.69506	7.79576	7.7996	7.8166	7.69076	7.75229	7.80754	7.78891	7.74686
1.08	7.79294	7.69004	7.79137	7.79531	7.81239	7.68576	7.74745	7.80324	7.78467	7.74195
1.09	7.78848	7.68496	7.78691	7.79095	7.80812	7.6807	7.74254	7.79888	7.78037	7.73699
1.1	7.78395	7.67983	7.7824	7.78653	7.80379	7.67558	7.73757	7.79447	7.77601	7.73198
1.11	7.77937	7.67466	7.77784	7.78207	7.79941	7.67043	7.73254	7.79	7.7716	7.72692
1.12	7.77475	7.66944	7.77322	7.77755	7.79499	7.66523	7.72746	7.78548	7.76715	7.72182
1.13	7.77008	7.66418	7.76857	7.77299	7.79052	7.65999	7.72233	7.78092	7.76265	7.71668
1.14	7.76537	7.65888	7.76387	7.7684	7.78601	7.65471	7.71715	7.77632	7.75812	7.71151
1.15	7.76062	7.65355	7.75914	7.76376	7.78146	7.64941	7.71193	7.77168	7.75355	7.70631
1.16	7.75584	7.64819	7.75437	7.75909	7.77689	7.64407	7.70668	7.76701	7.74894	7.70108
1.17	7.75102	7.6428	7.74957	7.7544	7.77228	7.63871	7.70139	7.7623	7.74431	7.69582
1.18	7.74618	7.63739	7.74475	7.74967	7.76764	7.63332	7.69607	7.75757	7.73965	7.69054
1.19	7.74132	7.63195	7.7399	7.74492	7.76298	7.62791	7.69072	7.75281	7.73497	7.68524
1.2	7.73643	7.62649	7.73502	7.74015	7.7583	7.62248	7.68535	7.74803	7.73026	7.67992
1.21	7.73152	7.62101	7.73013	7.73535	7.7536	7.61703	7.67995	7.74323	7.72554	7.67458
1.22	7.72659	7.61551	7.72521	7.73054	7.74887	7.61157	7.67453	7.73841	7.72079	7.66922
1.23	7.72164	7.61	7.72028	7.72571	7.74413	7.60608	7.66909	7.73357	7.71603	7.66385
1.24	7.71667	7.60447	7.71533	7.72086	7.73938	7.60058	7.66363	7.72872	7.71125	7.65846
1.25	7.71169	7.59893	7.71036	7.716	7.73461	7.59507	7.65816	7.72385	7.70645	7.65306
1.26	7.7067	7.59337	7.70539	7.71112	7.72982	7.58955	7.65267	7.71896	7.70165	7.64765
1.27	7.70169	7.58781	7.7004	7.70624	7.72502	7.58401	7.64716	7.71406	7.69683	7.64222
1.28	7.69667	7.58223	7.69539	7.70134	7.72021	7.57847	7.64164	7.70916	7.692	7.63679
1.29	7.69164	7.57664	7.69038	7.69643	7.7154	7.57292	7.63611	7.70424	7.68716	7.63135
1.3	7.6866	7.57104	7.68536	7.69151	7.71057	7.56735	7.63057	7.69931	7.68231	7.6259
1.31	7.68155	7.56544	7.68033	7.68658	7.70573	7.56178	7.62502	7.69437	7.67746	7.62044
1.32	7.6765	7.55983	7.67529	7.68164	7.70089	7.5562	7.61947	7.68943	7.67259	7.61498
1.33	7.67144	7.55421	7.67024	7.6767	7.69604	7.55062	7.6139	7.68447	7.66772	7.60951
1.34	7.66637	7.54858	7.66519	7.67175	7.69118	7.54503	7.60832	7.67951	7.66284	7.60403
1.35	7.66129	7.54295	7.66013	7.6668	7.68631	7.53943	7.60274	7.67455	7.65796	7.59855
1.36	7.65621	7.53732	7.65506	7.66183	7.68144	7.53383	7.59715	7.66958	7.65307	7.59306
1.37	7.65112	7.53168	7.64999	7.65687	7.67657	7.52822	7.59156	7.6646	7.64817	7.58757
1.38	7.64603	7.52603	7.64492	7.6519	7.67169	7.52261	7.58596	7.65962	7.64328	7.58207
1.39	7.64093	7.52038	7.63984	7.64692	7.66681	7.517	7.58035	7.65463	7.63837	7.57657
1.4	7.63583	7.51473	7.63476	7.64194	7.66192	7.51138	7.57474	7.64964	7.63347	7.57107
1.41	7.63073	7.50907	7.62967	7.63696	7.65703	7.50576	7.56913	7.64465	7.62856	7.56556
1.42	7.62562	7.50341	7.62458	7.63197	7.65213	7.50013	7.56351	7.63965	7.62364	7.56005
1.43	7.62051	7.49775	7.61949	7.62699	7.64724	7.4945	7.55789	7.63465	7.61873	7.55454
1.44	7.6154	7.49208	7.61439	7.62199	7.64234	7.48887	7.55227	7.62965	7.61381	7.54902
1.45	7.61028	7.48641	7.60929	7.617	7.63743	7.48324	7.54664	7.62465	7.60889	7.54351
1.46	7.60516	7.48074	7.60419	7.612	7.63253	7.47761	7.54101	7.61964	7.60396	7.53799
1.47	7.60004	7.47507	7.59909	7.60701	7.62762	7.47197	7.53538	7.61463	7.59904	7.53247
1.48	7.59492	7.4694	7.59398	7.60201	7.62271	7.46633	7.52975	7.60962	7.59411	7.52694
1.49	7.5898	7.46372	7.58888	7.597	7.6178	7.46069	7.52411	7.60461	7.58918	7.52142
1.5	7.58467	7.45804	7.58377	7.592	7.61289	7.45505	7.51847	7.59959	7.58425	7.51589
1.51	7.57954	7.45236	7.57866	7.58699	7.60798	7.44941	7.51283	7.59458	7.57932	7.51037
1.52	7.57442	7.44668	7.57355	7.58199	7.60306	7.44376	7.50719	7.58956	7.57438	7.50484
1.53	7.56929	7.441	7.56843	7.57698	7.59815	7.43812	7.50155	7.58454	7.56945	7.49931
1.54	7.56416	7.43532	7.56332	7.57197	7.59323	7.43247	7.49591	7.57952	7.56451	7.49378
1.55	7.55902	7.42964	7.55821	7.56696	7.58831	7.42683	7.49026	7.5745	7.55958	7.48825
1.56	7.55389	7.42395	7.55309	7.56195	7.58339	7.42118	7.48461	7.56948	7.55464	7.48272
1.57	7.54876	7.41827	7.54797	7.55694	7.57847	7.41553	7.47897	7.56445	7.5497	7.47718
1.58	7.54362	7.41258	7.54286	7.55193	7.57355	7.40988	7.47332	7.55943	7.54476	7.47165
1.59	7.53849	7.40689	7.53774	7.54691	7.56863	7.40423	7.46767	7.55441	7.53982	7.46612
1.6	7.53335	7.40121	7.53262	7.5419	7.56371	7.39858	7.46202	7.54938	7.53488	7.46058
1.61	7.52821	7.39552	7.5275	7.53688	7.55879	7.39293	7.45637	7.54435	7.52994	7.45505
1.62	7.52308	7.38983	7.52238	7.53187	7.55386	7.38727	7.45072	7.53933	7.525	7.44951
1.63	7.51794	7.38414	7.51726	7.52685	7.54894	7.38162	7.44506	7.5343	7.52005	7.44397
1.64	7.5128	7.37845	7.51214	7.52184	7.54402	7.37597	7.43941	7.52927	7.51511	7.43844
1.65	7.50766	7.37276	7.50702	7.51682	7.53909	7.37031	7.43376	7.52425	7.51017	7.4329
1.66	7.50252	7.36707	7.5019	7.5118	7.53417	7.36466	7.42811	7.51922	7.50523	7.42736
1.67	7.49738	7.36138	7.49677	7.50679	7.52924	7.35901	7.42245	7.51419	7.50028	7.42182
1.68	7.49224	7.35569	7.49165	7.50177	7.52432	7.35335	7.4168	7.50916	7.49534	7.41629
1.69	7.4871	7.35	7.48653	7.49675	7.51939	7.3477	7.41114	7.50413	7.49039	7.41075
1.7	7.48196	7.34431	7.48141	7.49173	7.51446	7.34204	7.40549	7.4991	7.48545	7.40521
1.71	7.47682	7.33861	7.47628	7.48672	7.50954	7.33639	7.39983	7.49407	7.4805	7.39967
1.72	7.47168	7.33292	7.47116	7.4817	7.50461	7.33073	7.39418	7.48904	7.47556	7.39413
1.73	7.46654	7.32723	7.46603	7.47668	7.49968	7.32507	7.38852	7.48401	7.47061	7.38859
1.74	7.4614	7.32154	7.46091	7.47166	7.49476	7.31942	7.38286	7.47898	7.46567	7.38305
1.75	7.45626	7.31584	7.45579	7.46664	7.48983	7.31376	7.37721	7.47395	7.46072	7.37751
1.76	7.45112	7.31015	7.45066	7.46162	7.4849	7.30811	7.37155	7.46892	7.45578	7.37197
1.77	7.44597	7.30446	7.44554	7.4566	7.47997	7.30245	7.36589	7.46389	7.45083	7.36643
1.78	7.44083	7.29877	7.44041	7.45158	7.47505	7.29679	7.36024	7.45886	7.44588	7.36089
1.79	7.43569	7.29307	7.43529	7.44656	7.47012	7.29114	7.35458	7.45383	7.44094	7.35535
1.8	7.43055	7.28738	7.43016	7.44154	7.46519	7.28548	7.34892	7.4488	7.43599	7.34981
1.81	7.42541	7.28169	7.42504	7.43652	7.46026	7.27982	7.34326	7.44377	7.43104	7.34427
1.82	7.42026	7.27599	7.41991	7.4315	7.45534	7.27417	7.33761	7.43874	7.4261	7.33873
1.83	7.41512	7.2703	7.41479	7.42648	7.45041	7.26851	7.33195	7.43371	7.42115	7.33319
1.84	7.40998	7.2646	7.40966	7.42146	7.44548	7.26285	7.32629	7.42867	7.4162	7.32765
1.85	7.40484	7.25891	7.40454	7.41644	7.44055	7.25719	7.32063	7.42364	7.41126	7.32211
1.86	7.39969	7.25322	7.39941	7.41142	7.43562	7.25154	7.31498	7.41861	7.40631	7.31657
1.87	7.39455	7.24752	7.39429	7.4064	7.43069	7.24588	7.30932	7.41358	7.40136	7.31103
1.88	7.38941	7.24183	7.38916	7.40138	7.42577	7.24022	7.30366	7.40855	7.39642	7.30549
1.89	7.38426	7.23613	7.38404	7.39636	7.42084	7.23456	7.298	7.40352	7.39147	7.29994
1.9	7.37912	7.23044	7.37891	7.39134	7.41591	7.22891	7.29234	7.39848	7.38652	7.2944
1.91	7.37398	7.22475	7.37378	7.38632	7.41098	7.22325	7.28669	7.39345	7.38157	7.28886
1.92	7.36884	7.21905	7.36866	7.3813	7.40605	7.21759	7.28103	7.38842	7.37663	7.28332
1.93	7.36369	7.21336	7.36353	7.37628	7.40112	7.21193	7.27537	7.38339	7.37168	7.27778
1.94	7.35855	7.20766	7.35841	7.37126	7.39619	7.20628	7.26971	7.37836	7.36673	7.27224
1.95	7.35341	7.20197	7.35328	7.36624	7.39127	7.20062	7.26405	7.37332	7.36179	7.2667
1.96	7.34826	7.19627	7.34816	7.36122	7.38634	7.19496	7.25839	7.36829	7.35684	7.26116
1.97	7.34312	7.19058	7.34303	7.35619	7.38141	7.1893	7.25274	7.36326	7.35189	7.25561
1.98	7.33798	7.18489	7.3379	7.35117	7.37648	7.18365	7.24708	7.35823	7.34694	7.25007
1.99	7.33283	7.17919	7.33278	7.34615	7.37155	7.17799	7.24142	7.3532	7.342	7.24453
2	7.32769	7.1735	7.32765	7.34113	7.36662	7.17233	7.23576	7.34816	7.33705	7.23899
2.01	7.32255	7.1678	7.32253	7.33611	7.36169	7.16667	7.2301	7.34313	7.3321	7.23345
2.02	7.3174	7.16211	7.3174	7.33109	7.35676	7.16101	7.22444	7.3381	7.32715	7.22791
2.03	7.31226	7.15641	7.31227	7.32607	7.35183	7.15536	7.21878	7.33307	7.32221	7.22237
2.04	7.30712	7.15072	7.30715	7.32105	7.34691	7.1497	7.21313	7.32804	7.31726	7.21683
2.05	7.30197	7.14502	7.30202	7.31603	7.34198	7.14404	7.20747	7.323	7.31231	7.21128
2.06	7.29683	7.13933	7.2969	7.31101	7.33705	7.13838	7.20181	7.31797	7.30736	7.20574
2.07	7.29169	7.13364	7.29177	7.30599	7.33212	7.13273	7.19615	7.31294	7.30242	7.2002
2.08	7.28654	7.12794	7.28664	7.30096	7.32719	7.12707	7.19049	7.30791	7.29747	7.19466
2.09	7.2814	7.12225	7.28152	7.29594	7.32226	7.12141	7.18483	7.30288	7.29252	7.18912
2.1	7.27626	7.11655	7.27639	7.29092	7.31733	7.11575	7.17917	7.29784	7.28757	7.18358
2.11	7.27111	7.11086	7.27127	7.2859	7.3124	7.11009	7.17351	7.29281	7.28263	7.17804
2.12	7.26597	7.10516	7.26614	7.28088	7.30747	7.10444	7.16786	7.28778	7.27768	7.17249
2.13	7.26083	7.09947	7.26101	7.27586	7.30255	7.09878	7.1622	7.28275	7.27273	7.16695
2.14	7.25568	7.09377	7.25589	7.27084	7.29762	7.09312	7.15654	7.27771	7.26778	7.16141
2.15	7.25054	7.08808	7.25076	7.26582	7.29269	7.08746	7.15088	7.27268	7.26284	7.15587
2.16	7.2454	7.08238	7.24564	7.2608	7.28776	7.0818	7.14522	7.26765	7.25789	7.15033
2.17	7.24025	7.07669	7.24051	7.25578	7.28283	7.07615	7.13956	7.26262	7.25294	7.14479
2.18	7.23511	7.07099	7.23538	7.25075	7.2779	7.07049	7.1339	7.25758	7.24799	7.13925
2.19	7.22997	7.0653	7.23026	7.24573	7.27297	7.06483	7.12824	7.25255	7.24305	7.1337
2.2	7.22482	7.05961	7.22513	7.24071	7.26804	7.05917	7.12259	7.24752	7.2381	7.12816
2.21	7.21968	7.05391	7.22001	7.23569	7.26311	7.05351	7.11693	7.24249	7.23315	7.12262
2.22	7.21454	7.04822	7.21488	7.23067	7.25818	7.04786	7.11127	7.23746	7.2282	7.11708
2.23	7.20939	7.04252	7.20975	7.22565	7.25326	7.0422	7.10561	7.23242	7.22326	7.11154
2.24	7.20425	7.03683	7.20463	7.22063	7.24833	7.03654	7.09995	7.22739	7.21831	7.106
2.25	7.1991	7.03113	7.1995	7.21561	7.2434	7.03088	7.09429	7.22236	7.21336	7.10046
2.26	7.19396	7.02544	7.19438	7.21059	7.23847	7.02522	7.08863	7.21733	7.20841	7.09491
2.27	7.18882	7.01974	7.18925	7.20557	7.23354	7.01957	7.08297	7.21229	7.20347	7.08937
2.28	7.18367	7.01405	7.18412	7.20054	7.22861	7.01391	7.07732	7.20726	7.19852	7.08383
2.29	7.17853	7.00835	7.179	7.19552	7.22368	7.00825	7.07166	7.20223	7.19357	7.07829
2.3	7.17339	7.00266	7.17387	7.1905	7.21875	7.00259	7.066	7.1972	7.18862	7.07275
2.31	7.16824	6.99696	7.16875	7.18548	7.21382	6.99693	7.06034	7.19217	7.18368	7.06721
2.32	7.1631	6.99127	7.16362	7.18046	7.20889	6.99128	7.05468	7.18713	7.17873	7.06166
2.33	7.15796	6.98557	7.15849	7.17544	7.20397	6.98562	7.04902	7.1821	7.17378	7.05612
2.34	7.15281	6.97988	7.15337	7.17042	7.19904	6.97996	7.04336	7.17707	7.16883	7.05058
2.35	7.14767	6.97419	7.14824	7.1654	7.19411	6.9743	7.0377	7.17204	7.16389	7.04504
2.36	7.14253	6.96849	7.14312	7.16038	7.18918	6.96864	7.03205	7.167	7.15894	7.0395
2.37	7.13738	6.9628	7.13799	7.15535	7.18425	6.96299	7.02639	7.16197	7.15399	7.03396
2.38	7.13224	6.9571	7.13286	7.15033	7.17932	6.95733	7.02073	7.15694	7.14904	7.02842
2.39	7.1271	6.95141	7.12774	7.14531	7.17439	6.95167	7.01507	7.15191	7.1441	7.02287
2.4	7.12195	6.94571	7.12261	7.14029	7.16946	6.94601	7.00941	7.14687	7.13915	7.01733
2.41	7.11681	6.94002	7.11748	7.13527	7.16453	6.94035	7.00375	7.14184	7.1342	7.01179
2.42	7.11167	6.93432	7.11236	7.13025	7.1596	6.9347	6.99809	7.13681	7.12925	7.00625
2.43	7.10652	6.92863	7.10723	7.12523	7.15468	6.92904	6.99243	7.13178	7.12431	7.00071
2.44	7.10138	6.92293	7.10211	7.12021	7.14975	6.92338	6.98677	7.12675	7.11936	6.99517
2.45	7.09624	6.91724	7.09698	7.11519	7.14482	6.91772	6.98112	7.12171	7.11441	6.98963
2.46	7.09109	6.91154	7.09185	7.11017	7.13989	6.91206	6.97546	7.11668	7.10946	6.98408
2.47	7.08595	6.90585	7.08673	7.10514	7.13496	6.90641	6.9698	7.11165	7.10452	6.97854
2.48	7.08081	6.90015	7.0816	7.10012	7.13003	6.90075	6.96414	7.10662	7.09957	6.973
2.49	7.07566	6.89446	7.07648	7.0951	7.1251	6.89509	6.95848	7.10158	7.09462	6.96746
2.5	7.07052	6.88877	7.07135	7.09008	7.12017	6.88943	6.95282	7.09655	7.08967	6.96192
2.51	7.06537	6.88307	7.06622	7.08506	7.11524	6.88377	6.94716	7.09152	7.08472	6.95638
2.52	7.06023	6.87738	7.0611	7.08004	7.11031	6.87812	6.9415	7.08649	7.07978	6.95083
2.53	7.05509	6.87168	7.05597	7.07502	7.10539	6.87246	6.93585	7.08145	7.07483	6.94529
2.54	7.04994	6.86599	7.05085	7.07	7.10046	6.8668	6.93019	7.07642	7.06988	6.93975
2.55	7.0448	6.86029	7.04572	7.06498	7.09553	6.86114	6.92453	7.07139	7.06493	6.93421
2.56	7.03966	6.8546	7.04059	7.05996	7.0906	6.85548	6.91887	7.06636	7.05999	6.92867
2.57	7.03451	6.8489	7.03547	7.05493	7.08567	6.84982	6.91321	7.06133	7.05504	6.92313
2.58	7.02937	6.84321	7.03034	7.04991	7.08074	6.84417	6.90755	7.05629	7.05009	6.91759
2.59	7.02423	6.83751	7.02521	7.04489	7.07581	6.83851	6.90189	7.05126	7.04514	6.91204
2.6	7.01908	6.83182	7.02009	7.03987	7.07088	6.83285	6.89623	7.04623	7.0402	6.9065
2.61	7.01394	6.82612	7.01496	7.03485	7.06595	6.82719	6.89057	7.0412	7.03525	6.90096
2.62	7.0088	6.82043	7.00984	7.02983	7.06102	6.82153	6.88492	7.03616	7.0303	6.89542
2.63	7.00365	6.81473	7.00471	7.02481	7.05609	6.81588	6.87926	7.03113	7.02535	6.88988
2.64	6.99851	6.80904	6.99958	7.01979	7.05117	6.81022	6.8736	7.0261	7.02041	6.88434
2.65	6.99337	6.80334	6.99446	7.01477	7.04624	6.80456	6.86794	7.02107	7.01546	6.8788
2.66	6.98822	6.79765	6.98933	7.00974	7.04131	6.7989	6.86228	7.01604	7.01051	6.87325
2.67	6.98308	6.79196	6.98421	7.00472	7.03638	6.79324	6.85662	7.011	7.00556	6.86771
2.68	6.97794	6.78626	6.97908	6.9997	7.03145	6.78759	6.85096	7.00597	7.00062	6.86217
2.69	6.97279	6.78057	6.97395	6.99468	7.02652	6.78193	6.8453	7.00094	6.99567	6.85663
2.7	6.96765	6.77487	6.96883	6.98966	7.02159	6.77627	6.83965	6.99591	6.99072	6.85109
2.71	6.96251	6.76918	6.9637	6.98464	7.01666	6.77061	6.83399	6.99087	6.98577	6.84555
2.72	6.95736	6.76348	6.95858	6.97962	7.01173	6.76495	6.82833	6.98584	6.98083	6.84
2.73	6.95222	6.75779	6.95345	6.9746	7.0068	6.7593	6.82267	6.98081	6.97588	6.83446
2.74	6.94707	6.75209	6.94832	6.96958	7.00188	6.75364	6.81701	6.97578	6.97093	6.82892
2.75	6.94193	6.7464	6.9432	6.96456	6.99695	6.74798	6.81135	6.97074	6.96598	6.82338
2.76	6.93679	6.7407	6.93807	6.95953	6.99202	6.74232	6.80569	6.96571	6.96104	6.81784
2.77	6.93164	6.73501	6.93294	6.95451	6.98709	6.73666	6.80003	6.96068	6.95609	6.8123
2.78	6.9265	6.72931	6.92782	6.94949	6.98216	6.73101	6.79437	6.95565	6.95114	6.80676
2.79	6.92136	6.72362	6.92269	6.94447	6.97723	6.72535	6.78872	6.95062	6.94619	6.80121
2.8	6.91621	6.71792	6.91757	6.93945	6.9723	6.71969	6.78306	6.94558	6.94125	6.79567
2.81	6.91107	6.71223	6.91244	6.93443	6.96737	6.71403	6.7774	6.94055	6.9363	6.79013
2.82	6.90593	6.70654	6.90731	6.92941	6.96244	6.70837	6.77174	6.93552	6.93135	6.78459
2.83	6.90078	6.70084	6.90219	6.92439	6.95751	6.70272	6.76608	6.93049	6.9264	6.77905
2.84	6.89564	6.69515	6.89706	6.91937	6.95259	6.69706	6.76042	6.92545	6.92146	6.77351
2.85	6.8905	6.68945	6.89194	6.91434	6.94766	6.6914	6.75476	6.92042	6.91651	6.76796
2.86	6.88535	6.68376	6.88681	6.90932	6.94273	6.68574	6.7491	6.91539	6.91156	6.76242
2.87	6.88021	6.67806	6.88168	6.9043	6.9378	6.68008	6.74345	6.91036	6.90661	6.75688
2.88	6.87507	6.67237	6.87656	6.89928	6.93287	6.67443	6.73779	6.90532	6.90166	6.75134
2.89	6.86992	6.66667	6.87143	6.89426	6.92794	6.66877	6.73213	6.90029	6.89672	6.7458
2.9	6.86478	6.66098	6.86631	6.88924	6.92301	6.66311	6.72647	6.89526	6.89177	6.74026
2.91	6.85964	6.65528	6.86118	6.88422	6.91808	6.65745	6.72081	6.89023	6.88682	6.73472
2.92	6.85449	6.64959	6.85605	6.8792	6.91315	6.65179	6.71515	6.8852	6.88187	6.72917
2.93	6.84935	6.64389	6.85093	6.87418	6.90822	6.64614	6.70949	6.88016	6.87693	6.72363
2.94	6.84421	6.6382	6.8458	6.86916	6.9033	6.64048	6.70383	6.87513	6.87198	6.71809
2.95	6.83906	6.6325	6.84067	6.86413	6.89837	6.63482	6.69818	6.8701	6.86703	6.71255
2.96	6.83392	6.62681	6.83555	6.85911	6.89344	6.62916	6.69252	6.86507	6.86208	6.70701
2.97	6.82877	6.62111	6.83042	6.85409	6.88851	6.6235	6.68686	6.86003	6.85714	6.70147
2.98	6.82363	6.61542	6.8253	6.84907	6.88358	6.61785	6.6812	6.855	6.85219	6.69593
2.99	6.81849	6.60973	6.82017	6.84405	6.87865	6.61219	6.67554	6.84997	6.84724	6.69038
3	6.81334	6.60403	6.81504	6.83903	6.87372	6.60653	6.66988	6.84494	6.84229	6.68484
3.01	6.8082	6.59834	6.80992	6.83401	6.86879	6.60087	6.66422	6.8399	6.83735	6.6793
3.02	6.80306	6.59264	6.80479	6.82899	6.86386	6.59521	6.65856	6.83487	6.8324	6.67376
3.03	6.79791	6.58695	6.79967	6.82397	6.85893	6.58956	6.6529	6.82984	6.82745	6.66822
3.04	6.79277	6.58125	6.79454	6.81894	6.854	6.5839	6.64725	6.82481	6.8225	6.66268
3.05	6.78763	6.57556	6.78941	6.81392	6.84908	6.57824	6.64159	6.81978	6.81756	6.65713
3.06	6.78248	6.56986	6.78429	6.8089	6.84415	6.57258	6.63593	6.81474	6.81261	6.65159
3.07	6.77734	6.56417	6.77916	6.80388	6.83922	6.56692	6.63027	6.80971	6.80766	6.64605
3.08	6.7722	6.55847	6.77404	6.79886	6.83429	6.56127	6.62461	6.80468	6.80271	6.64051
3.09	6.76705	6.55278	6.76891	6.79384	6.82936	6.55561	6.61895	6.79965	6.79777	6.63497
3.1	6.76191	6.54708	6.76378	6.78882	6.82443	6.54995	6.61329	6.79461	6.79282	6.62943
3.11	6.75677	6.54139	6.75866	6.7838	6.8195	6.54429	6.60763	6.78958	6.78787	6.62389
3.12	6.75162	6.53569	6.75353	6.77878	6.81457	6.53863	6.60198	6.78455	6.78292	6.61834
3.13	6.74648	6.53	6.7484	6.77376	6.80964	6.53298	6.59632	6.77952	6.77798	6.6128
3.14	6.74134	6.52431	6.74328	6.76873	6.80471	6.52732	6.59066	6.77448	6.77303	6.60726
3.15	6.73619	6.51861	6.73815	6.76371	6.79979	6.52166	6.585	6.76945	6.76808	6.60172
3.16	6.73105	6.51292	6.73303	6.75869	6.79486	6.516	6.57934	6.76442	6.76313	6.59618
3.17	6.7259	6.50722	6.7279	6.75367	6.78993	6.51034	6.57368	6.75939	6.75819	6.59064
3.18	6.72076	6.50153	6.72277	6.74865	6.785	6.50469	6.56802	6.75436	6.75324	6.5851
3.19	6.71562	6.49583	6.71765	6.74363	6.78007	6.49903	6.56236	6.74932	6.74829	6.57955
3.2	6.71047	6.49014	6.71252	6.73861	6.77514	6.49337	6.5567	6.74429	6.74334	6.57401
3.21	6.70533	6.48444	6.7074	6.73359	6.77021	6.48771	6.55105	6.73926	6.7384	6.56847
3.22	6.70019	6.47875	6.70227	6.72857	6.76528	6.48205	6.54539	6.73423	6.73345	6.56293
3.23	6.69504	6.47305	6.69714	6.72354	6.76035	6.47639	6.53973	6.72919	6.7285	6.55739
3.24	6.6899	6.46736	6.69202	6.71852	6.75542	6.47074	6.53407	6.72416	6.72355	6.55185
3.25	6.68476	6.46166	6.68689	6.7135	6.7505	6.46508	6.52841	6.71913	6.7186	6.5463
3.26	6.67961	6.45597	6.68177	6.70848	6.74557	6.45942	6.52275	6.7141	6.71366	6.54076
3.27	6.67447	6.45027	6.67664	6.70346	6.74064	6.45376	6.51709	6.70906	6.70871	6.53522
3.28	6.66933	6.44458	6.67151	6.69844	6.73571	6.4481	6.51143	6.70403	6.70376	6.52968
3.29	6.66418	6.43888	6.66639	6.69342	6.73078	6.44245	6.50578	6.699	6.69881	6.52414
3.3	6.65904	6.43319	6.66126	6.6884	6.72585	6.43679	6.50012	6.69397	6.69387	6.5186
3.31	6.6539	6.4275	6.65613	6.68338	6.72092	6.43113	6.49446	6.68894	6.68892	6.51306
3.32	6.64875	6.4218	6.65101	6.67836	6.71599	6.42547	6.4888	6.6839	6.68397	6.50751
3.33	6.64361	6.41611	6.64588	6.67333	6.71106	6.41981	6.48314	6.67887	6.67902	6.50197
3.34	6.63847	6.41041	6.64076	6.66831	6.70613	6.41416	6.47748	6.67384	6.67408	6.49643
3.35	6.63332	6.40472	6.63563	6.66329	6.7012	6.4085	6.47182	6.66881	6.66913	6.49089
3.36	6.62818	6.39902	6.6305	6.65827	6.69628	6.40284	6.46616	6.66377	6.66418	6.48535
3.37	6.62304	6.39333	6.62538	6.65325	6.69135	6.39718	6.4605	6.65874	6.65923	6.47981
3.38	6.61789	6.38763	6.62025	6.64823	6.68642	6.39152	6.45485	6.65371	6.65429	6.47426
3.39	6.61275	6.38194	6.61513	6.64321	6.68149	6.38587	6.44919	6.64868	6.64934	6.46872
3.4	6.6076	6.37624	6.61	6.63819	6.67656	6.38021	6.44353	6.64364	6.64439	6.46318
3.41	6.60246	6.37055	6.60487	6.63317	6.67163	6.37455	6.43787	6.63861	6.63944	6.45764
3.42	6.59732	6.36485	6.59975	6.62814	6.6667	6.36889	6.43221	6.63358	6.6345	6.4521
3.43	6.59217	6.35916	6.59462	6.62312	6.66177	6.36323	6.42655	6.62855	6.62955	6.44656
3.44	6.58703	6.35346	6.5895	6.6181	6.65684	6.35758	6.42089	6.62352	6.6246	6.44102
3.45	6.58189	6.34777	6.58437	6.61308	6.65191	6.35192	6.41523	6.61848	6.61965	6.43547
3.46	6.57674	6.34208	6.57924	6.60806	6.64699	6.34626	6.40958	6.61345	6.61471	6.42993
3.47	6.5716	6.33638	6.57412	6.60304	6.64206	6.3406	6.40392	6.60842	6.60976	6.42439
3.48	6.56646	6.33069	6.56899	6.59802	6.63713	6.33494	6.39826	6.60339	6.60481	6.41885
3.49	6.56131	6.32499	6.56386	6.593	6.6322	6.32929	6.3926	6.59835	6.59986	6.41331
3.5	6.55617	6.3193	6.55874	6.58798	6.62727	6.32363	6.38694	6.59332	6.59492	6.40777
3.51	6.55103	6.3136	6.55361	6.58296	6.62234	6.31797	6.38128	6.58829	6.58997	6.40223
3.52	6.54588	6.30791	6.54849	6.57793	6.61741	6.31231	6.37562	6.58326	6.58502	6.39668
3.53	6.54074	6.30221	6.54336	6.57291	6.61248	6.30665	6.36996	6.57822	6.58007	6.39114
3.54	6.5356	6.29652	6.53823	6.56789	6.60755	6.301	6.36431	6.57319	6.57513	6.3856
3.55	6.53045	6.29082	6.53311	6.56287	6.60262	6.29534	6.35865	6.56816	6.57018	6.38006
3.56	6.52531	6.28513	6.52798	6.55785	6.5977	6.28968	6.35299	6.56313	6.56523	6.37452
3.57	6.52017	6.27943	6.52286	6.55283	6.59277	6.28402	6.34733	6.5581	6.56028	6.36898
3.58	6.51502	6.27374	6.51773	6.54781	6.58784	6.27836	6.34167	6.55306	6.55534	6.36343
3.59	6.50988	6.26804	6.5126	6.54279	6.58291	6.27271	6.33601	6.54803	6.55039	6.35789
3.6	6.50474	6.26235	6.50748	6.53777	6.57798	6.26705	6.33035	6.543	6.54544	6.35235
3.61	6.49959	6.25665	6.50235	6.53274	6.57305	6.26139	6.32469	6.53797	6.54049	6.34681
3.62	6.49445	6.25096	6.49723	6.52772	6.56812	6.25573	6.31903	6.53293	6.53554	6.34127
3.63	6.4893	6.24527	6.4921	6.5227	6.56319	6.25007	6.31338	6.5279	6.5306	6.33573
3.64	6.48416	6.23957	6.48697	6.51768	6.55826	6.24442	6.30772	6.52287	6.52565	6.33019
3.65	6.47902	6.23388	6.48185	6.51266	6.55333	6.23876	6.30206	6.51784	6.5207	6.32464
3.66	6.47387	6.22818	6.47672	6.50764	6.54841	6.2331	6.2964	6.5128	6.51575	6.3191
3.67	6.46873	6.22249	6.47159	6.50262	6.54348	6.22744	6.29074	6.50777	6.51081	6.31356
3.68	6.46359	6.21679	6.46647	6.4976	6.53855	6.22178	6.28508	6.50274	6.50586	6.30802
3.69	6.45844	6.2111	6.46134	6.49258	6.53362	6.21613	6.27942	6.49771	6.50091	6.30248
3.7	6.4533	6.2054	6.45622	6.48756	6.52869	6.21047	6.27376	6.49268	6.49596	6.29694
3.71	6.44816	6.19971	6.45109	6.48253	6.52376	6.20481	6.26811	6.48764	6.49102	6.29139
3.72	6.44301	6.19401	6.44596	6.47751	6.51883	6.19915	6.26245	6.48261	6.48607	6.28585
3.73	6.43787	6.18832	6.44084	6.47249	6.5139	6.19349	6.25679	6.47758	6.48112	6.28031
3.74	6.43273	6.18262	6.43571	6.46747	6.50897	6.18784	6.25113	6.47255	6.47617	6.27477
3.75	6.42758	6.17693	6.43059	6.46245	6.50404	6.18218	6.24547	6.46751	6.47123	6.26923
3.76	6.42244	6.17123	6.42546	6.45743	6.49911	6.17652	6.23981	6.46248	6.46628	6.26369
3.77	6.4173	6.16554	6.42033	6.45241	6.49419	6.17086	6.23415	6.45745	6.46133	6.25815
3.78	6.41215	6.15985	6.41521	6.44739	6.48926	6.1652	6.22849	6.45242	6.45638	6.2526
3.79	6.40701	6.15415	6.41008	6.44237	6.48433	6.15955	6.22283	6.44739	6.45144	6.24706
3.8	6.40187	6.14846	6.40496	6.43734	6.4794	6.15389	6.21718	6.44235	6.44649	6.24152
3.81	6.39672	6.14276	6.39983	6.43232	6.47447	6.14823	6.21152	6.43732	6.44154	6.23598
3.82	6.39158	6.13707	6.3947	6.4273	6.46954	6.14257	6.20586	6.43229	6.43659	6.23044
3.83	6.38644	6.13137	6.38958	6.42228	6.46461	6.13691	6.2002	6.42726	6.43165	6.2249
3.84	6.38129	6.12568	6.38445	6.41726	6.45968	6.13125	6.19454	6.42222	6.4267	6.21936
3.85	6.37615	6.11998	6.37932	6.41224	6.45475	6.1256	6.18888	6.41719	6.42175	6.21381
3.86	6.371	6.11429	6.3742	6.40722	6.44982	6.11994	6.18322	6.41216	6.4168	6.20827
3.87	6.36586	6.10859	6.36907	6.4022	6.4449	6.11428	6.17756	6.40713	6.41186	6.20273
3.88	6.36072	6.1029	6.36395	6.39718	6.43997	6.10862	6.17191	6.40209	6.40691	6.19719
3.89	6.35557	6.0972	6.35882	6.39216	6.43504	6.10296	6.16625	6.39706	6.40196	6.19165
3.9	6.35043	6.09151	6.35369	6.38713	6.43011	6.09731	6.16059	6.39203	6.39701	6.18611
3.91	6.34529	6.08581	6.34857	6.38211	6.42518	6.09165	6.15493	6.387	6.39207	6.18056
3.92	6.34014	6.08012	6.34344	6.37709	6.42025	6.08599	6.14927	6.38197	6.38712	6.17502
3.93	6.335	6.07442	6.33832	6.37207	6.41532	6.08033	6.14361	6.37693	6.38217	6.16948
3.94	6.32986	6.06873	6.33319	6.36705	6.41039	6.07467	6.13795	6.3719	6.37722	6.16394
3.95	6.32471	6.06304	6.32806	6.36203	6.40546	6.06902	6.13229	6.36687	6.37227	6.1584
3.96	6.31957	6.05734	6.32294	6.35701	6.40053	6.06336	6.12663	6.36184	6.36733	6.15286
3.97	6.31443	6.05165	6.31781	6.35199	6.39561	6.0577	6.12098	6.3568	6.36238	6.14732
3.98	6.30928	6.04595	6.31269	6.34697	6.39068	6.05204	6.11532	6.35177	6.35743	6.14177
3.99	6.30414	6.04026	6.30756	6.34194	6.38575	6.04638	6.10966	6.34674	6.35248	6.13623
4	6.299	6.03456	6.30243	6.33692	6.38082	6.04073	6.104	6.34171	6.34754	6.13069
4.01	6.29385	6.02887	6.29731	6.3319	6.37589	6.03507	6.09834	6.33667	6.34259	6.12515
4.02	6.28871	6.02317	6.29218	6.32688	6.37096	6.02941	6.09268	6.33164	6.33764	6.11961
4.03	6.28357	6.01748	6.28706	6.32186	6.36603	6.02375	6.08702	6.32661	6.33269	6.11407
4.04	6.27842	6.01178	6.28193	6.31684	6.3611	6.01809	6.08136	6.32158	6.32775	6.10853
4.05	6.27328	6.00609	6.2768	6.31182	6.35617	6.01244	6.07571	6.31655	6.3228	6.10298
4.06	6.26814	6.00039	6.27168	6.3068	6.35124	6.00678	6.07005	6.31151	6.31785	6.09744
4.07	6.26299	5.9947	6.26655	6.30178	6.34632	6.00112	6.06439	6.30648	6.3129	6.0919
4.08	6.25785	5.989	6.26142	6.29676	6.34139	5.99546	6.05873	6.30145	6.30796	6.08636
4.09	6.2527	5.98331	6.2563	6.29173	6.33646	5.9898	6.05307	6.29642	6.30301	6.08082
4.1	6.24756	5.97762	6.25117	6.28671	6.33153	5.98415	6.04741	6.29138	6.29806	6.07528
4.11	6.24242	5.97192	6.24605	6.28169	6.3266	5.97849	6.04175	6.28635	6.29311	6.06973
4.12	6.23727	5.96623	6.24092	6.27667	6.32167	5.97283	6.03609	6.28132	6.28817	6.06419
4.13	6.23213	5.96053	6.23579	6.27165	6.31674	5.96717	6.03044	6.27629	6.28322	6.05865
4.14	6.22699	5.95484	6.23067	6.26663	6.31181	5.96151	6.02478	6.27125	6.27827	6.05311
4.15	6.22184	5.94914	6.22554	6.26161	6.30688	5.95586	6.01912	6.26622	6.27332	6.04757
4.16	6.2167	5.94345	6.22042	6.25659	6.30195	5.9502	6.01346	6.26119	6.26838	6.04203
4.17	6.21156	5.93775	6.21529	6.25157	6.29702	5.94454	6.0078	6.25616	6.26343	6.03649
4.18	6.20641	5.93206	6.21016	6.24654	6.2921	5.93888	6.00214	6.25113	6.25848	6.03094
4.19	6.20127	5.92636	6.20504	6.24152	6.28717	5.93322	5.99648	6.24609	6.25353	6.0254
4.2	6.19613	5.92067	6.19991	6.2365	6.28224	5.92757	5.99082	6.24106	6.24859	6.01986
4.21	6.19098	5.91497	6.19479	6.23148	6.27731	5.92191	5.98516	6.23603	6.24364	6.01432
4.22	6.18584	5.90928	6.18966	6.22646	6.27238	5.91625	5.97951	6.231	6.23869	6.00878
4.23	6.1807	5.90358	6.18453	6.22144	6.26745	5.91059	5.97385	6.22596	6.23374	6.00324
4.24	6.17555	5.89789	6.17941	6.21642	6.26252	5.90493	5.96819	6.22093	6.2288	5.99769
4.25	6.17041	5.8922	6.17428	6.2114	6.25759	5.89928	5.96253	6.2159	6.22385	5.99215
4.26	6.16527	5.8865	6.16915	6.20638	6.25266	5.89362	5.95687	6.21087	6.2189	5.98661
4.27	6.16012	5.88081	6.16403	6.20136	6.24773	5.88796	5.95121	6.20583	6.21395	5.98107
4.28	6.15498	5.87511	6.1589	6.19633	6.24281	5.8823	5.94555	6.2008	6.20901	5.97553
4.29	6.14984	5.86942	6.15378	6.19131	6.23788	5.87664	5.93989	6.19577	6.20406	5.96999
4.3	6.14469	5.86372	6.14865	6.18629	6.23295	5.87099	5.93424	6.19074	6.19911	5.96445
4.31	6.13955	5.85803	6.14352	6.18127	6.22802	5.86533	5.92858	6.18571	6.19416	5.9589
4.32	6.1344	5.85233	6.1384	6.17625	6.22309	5.85967	5.92292	6.18067	6.18921	5.95336
4.33	6.12926	5.84664	6.13327	6.17123	6.21816	5.85401	5.91726	6.17564	6.18427	5.94782
4.34	6.12412	5.84094	6.12815	6.16621	6.21323	5.84835	5.9116	6.17061	6.17932	5.94228
4.35	6.11897	5.83525	6.12302	6.16119	6.2083	5.8427	5.90594	6.16558	6.17437	5.93674
4.36	6.11383	5.82955	6.11789	6.15617	6.20337	5.83704	5.90028	6.16054	6.16942	5.9312
4.37	6.10869	5.82386	6.11277	6.15114	6.19844	5.83138	5.89462	6.15551	6.16448	5.92566
4.38	6.10354	5.81816	6.10764	6.14612	6.19352	5.82572	5.88896	6.15048	6.15953	5.92011
4.39	6.0984	5.81247	6.10252	6.1411	6.18859	5.82006	5.88331	6.14545	6.15458	5.91457
4.4	6.09326	5.80677	6.09739	6.13608	6.18366	5.81441	5.87765	6.14041	6.14963	5.90903
4.41	6.08811	5.80108	6.09226	6.13106	6.17873	5.80875	5.87199	6.13538	6.14469	5.90349
4.42	6.08297	5.79539	6.08714	6.12604	6.1738	5.80309	5.86633	6.13035	6.13974	5.89795
4.43	6.07783	5.78969	6.08201	6.12102	6.16887	5.79743	5.86067	6.12532	6.13479	5.89241
4.44	6.07268	5.784	6.07688	6.116	6.16394	5.79177	5.85501	6.12029	6.12984	5.88686
4.45	6.06754	5.7783	6.07176	6.11098	6.15901	5.78611	5.84935	6.11525	6.1249	5.88132
4.46	6.0624	5.77261	6.06663	6.10596	6.15408	5.78046	5.84369	6.11022	6.11995	5.87578
4.47	6.05725	5.76691	6.06151	6.10093	6.14915	5.7748	5.83804	6.10519	6.115	5.87024
4.48	6.05211	5.76122	6.05638	6.09591	6.14423	5.76914	5.83238	6.10016	6.11005	5.8647
4.49	6.04697	5.75552	6.05125	6.09089	6.1393	5.76348	5.82672	6.09512	6.10511	5.85916
4.5	6.04182	5.74983	6.04613	6.08587	6.13437	5.75782	5.82106	6.09009	6.10016	5.85362
4.51	6.03668	5.74413	6.041	6.08085	6.12944	5.75217	5.8154	6.08506	6.09521	5.84807
4.52	6.03154	5.73844	6.03588	6.07583	6.12451	5.74651	5.80974	6.08003	6.09026	5.84253
4.53	6.02639	5.73274	6.03075	6.07081	6.11958	5.74085	5.80408	6.07499	6.08532	5.83699
4.54	6.02125	5.72705	6.02562	6.06579	6.11465	5.73519	5.79842	6.06996	6.08037	5.83145
4.55	6.0161	5.72135	6.0205	6.06077	6.10972	5.72953	5.79276	6.06493	6.07542	5.82591
4.56	6.01096	5.71566	6.01537	6.05574	6.10479	5.72388	5.78711	6.0599	6.07047	5.82037
4.57	6.00582	5.70997	6.01025	6.05072	6.09986	5.71822	5.78145	6.05487	6.06553	5.81483
4.58	6.00067	5.70427	6.00512	6.0457	6.09493	5.71256	5.77579	6.04983	6.06058	5.80928
4.59	5.99553	5.69858	5.99999	6.04068	6.09001	5.7069	5.77013	6.0448	6.05563	5.80374
4.6	5.99039	5.69288	5.99487	6.03566	6.08508	5.70124	5.76447	6.03977	6.05068	5.7982
4.61	5.98524	5.68719	5.98974	6.03064	6.08015	5.69559	5.75881	6.03474	6.04574	5.79266
4.62	5.9801	5.68149	5.98461	6.02562	6.07522	5.68993	5.75315	6.0297	6.04079	5.78712
4.63	5.97496	5.6758	5.97949	6.0206	6.07029	5.68427	5.74749	6.02467	6.03584	5.78158
4.64	5.96981	5.6701	5.97436	6.01558	6.06536	5.67861	5.74184	6.01964	6.03089	5.77603
4.65	5.96467	5.66441	5.96924	6.01056	6.06043	5.67295	5.73618	6.01461	6.02595	5.77049
4.66	5.95953	5.65871	5.96411	6.00553	6.0555	5.6673	5.73052	6.00957	6.021	5.76495
4.67	5.95438	5.65302	5.95898	6.00051	6.05057	5.66164	5.72486	6.00454	6.01605	5.75941
4.68	5.94924	5.64732	5.95386	5.99549	6.04564	5.65598	5.7192	5.99951	6.0111	5.75387
4.69	5.9441	5.64163	5.94873	5.99047	6.04072	5.65032	5.71354	5.99448	6.00615	5.74833
4.7	5.93895	5.63593	5.94361	5.98545	6.03579	5.64466	5.70788	5.98945	6.00121	5.74279
4.71	5.93381	5.63024	5.93848	5.98043	6.03086	5.63901	5.70222	5.98441	5.99626	5.73724
4.72	5.92867	5.62454	5.93335	5.97541	6.02593	5.63335	5.69657	5.97938	5.99131	5.7317
4.73	5.92352	5.61885	5.92823	5.97039	6.021	5.62769	5.69091	5.97435	5.98636	5.72616
4.74	5.91838	5.61316	5.9231	5.96537	6.01607	5.62203	5.68525	5.96932	5.98142	5.72062
4.75	5.91324	5.60746	5.91798	5.96034	6.01114	5.61637	5.67959	5.96428	5.97647	5.71508
4.76	5.90809	5.60177	5.91285	5.95532	6.00621	5.61072	5.67393	5.95925	5.97152	5.70954
4.77	5.90295	5.59607	5.90772	5.9503	6.00128	5.60506	5.66827	5.95422	5.96657	5.70399
4.78	5.8978	5.59038	5.9026	5.94528	5.99635	5.5994	5.66261	5.94919	5.96163	5.69845
4.79	5.89266	5.58468	5.89747	5.94026	5.99143	5.59374	5.65695	5.94416	5.95668	5.69291
4.8	5.88752	5.57899	5.89234	5.93524	5.9865	5.58808	5.65129	5.93912	5.95173	5.68737
4.81	5.88237	5.57329	5.88722	5.93022	5.98157	5.58243	5.64564	5.93409	5.94678	5.68183
4.82	5.87723	5.5676	5.88209	5.9252	5.97664	5.57677	5.63998	5.92906	5.94184	5.67629
4.83	5.87209	5.5619	5.87697	5.92018	5.97171	5.57111	5.63432	5.92403	5.93689	5.67075
4.84	5.86694	5.55621	5.87184	5.91516	5.96678	5.56545	5.62866	5.91899	5.93194	5.6652
4.85	5.8618	5.55051	5.86671	5.91013	5.96185	5.55979	5.623	5.91396	5.92699	5.65966
4.86	5.85666	5.54482	5.86159	5.90511	5.95692	5.55414	5.61734	5.90893	5.92205	5.65412
4.87	5.85151	5.53912	5.85646	5.90009	5.95199	5.54848	5.61168	5.9039	5.9171	5.64858
4.88	5.84637	5.53343	5.85134	5.89507	5.94706	5.54282	5.60602	5.89886	5.91215	5.64304
4.89	5.84123	5.52774	5.84621	5.89005	5.94214	5.53716	5.60037	5.89383	5.9072	5.6375
4.9	5.83608	5.52204	5.84108	5.88503	5.93721	5.5315	5.59471	5.8888	5.90226	5.63196
4.91	5.83094	5.51635	5.83596	5.88001	5.93228	5.52585	5.58905	5.88377	5.89731	5.62641
4.92	5.8258	5.51065	5.83083	5.87499	5.92735	5.52019	5.58339	5.87874	5.89236	5.62087
4.93	5.82065	5.50496	5.82571	5.86997	5.92242	5.51453	5.57773	5.8737	5.88741	5.61533
4.94	5.81551	5.49926	5.82058	5.86494	5.91749	5.50887	5.57207	5.86867	5.88247	5.60979
4.95	5.81037	5.49357	5.81545	5.85992	5.91256	5.50321	5.56641	5.86364	5.87752	5.60425
4.96	5.80522	5.48787	5.81033	5.8549	5.90763	5.49756	5.56075	5.85861	5.87257	5.59871
4.97	5.80008	5.48218	5.8052	5.84988	5.9027	5.4919	5.55509	5.85357	5.86762	5.59316
4.98	5.79494	5.47648	5.80007	5.84486	5.89777	5.48624	5.54944	5.84854	5.86268	5.58762
4.99	5.78979	5.47079	5.79495	5.83984	5.89284	5.48058	5.54378	5.84351	5.85773	5.58208
5	5.78465	5.46509	5.78982	5.83482	5.88792	5.47492	5.53812	5.83848	5.85278	5.57654
5.01	5.7795	5.4594	5.7847	5.8298	5.88299	5.46927	5.53246	5.83344	5.84783	5.571
5.02	5.77436	5.4537	5.77957	5.82478	5.87806	5.46361	5.5268	5.82841	5.84289	5.56546
5.03	5.76922	5.44801	5.77444	5.81976	5.87313	5.45795	5.52114	5.82338	5.83794	5.55992
5.04	5.76407	5.44231	5.76932	5.81473	5.8682	5.45229	5.51548	5.81835	5.83299	5.55437
5.05	5.75893	5.43662	5.76419	5.80971	5.86327	5.44663	5.50982	5.81332	5.82804	5.54883
5.06	5.75379	5.43093	5.75907	5.80469	5.85834	5.44098	5.50417	5.80828	5.82309	5.54329
5.07	5.74864	5.42523	5.75394	5.79967	5.85341	5.43532	5.49851	5.80325	5.81815	5.53775
5.08	5.7435	5.41954	5.74881	5.79465	5.84848	5.42966	5.49285	5.79822	5.8132	5.53221
5.09	5.73836	5.41384	5.74369	5.78963	5.84355	5.424	5.48719	5.79319	5.80825	5.52667
5.1	5.73321	5.40815	5.73856	5.78461	5.83863	5.41834	5.48153	5.78815	5.8033	5.52112
5.11	5.72807	5.40245	5.73344	5.77959	5.8337	5.41268	5.47587	5.78312	5.79836	5.51558
5.12	5.72293	5.39676	5.72831	5.77457	5.82877	5.40703	5.47021	5.77809	5.79341	5.51004
5.13	5.71778	5.39106	5.72318	5.76954	5.82384	5.40137	5.46455	5.77306	5.78846	5.5045
5.14	5.71264	5.38537	5.71806	5.76452	5.81891	5.39571	5.45889	5.76802	5.78351	5.49896
5.15	5.7075	5.37967	5.71293	5.7595	5.81398	5.39005	5.45324	5.76299	5.77857	5.49342
5.16	5.70235	5.37398	5.7078	5.75448	5.80905	5.38439	5.44758	5.75796	5.77362	5.48788
5.17	5.69721	5.36828	5.70268	5.74946	5.80412	5.37874	5.44192	5.75293	5.76867	5.48233
5.18	5.69207	5.36259	5.69755	5.74444	5.79919	5.37308	5.43626	5.7479	5.76372	5.47679
5.19	5.68692	5.35689	5.69243	5.73942	5.79426	5.36742	5.4306	5.74286	5.75878	5.47125
5.2	5.68178	5.3512	5.6873	5.7344	5.78934	5.36176	5.42494	5.73783	5.75383	5.46571
5.21	5.67664	5.34551	5.68217	5.72938	5.78441	5.3561	5.41928	5.7328	5.74888	5.46017
5.22	5.67149	5.33981	5.67705	5.72436	5.77948	5.35045	5.41362	5.72777	5.74393	5.45463
5.23	5.66635	5.33412	5.67192	5.71933	5.77455	5.34479	5.40797	5.72273	5.73899	5.44909
5.24	5.6612	5.32842	5.6668	5.71431	5.76962	5.33913	5.40231	5.7177	5.73404	5.44354
5.25	5.65606	5.32273	5.66167	5.70929	5.76469	5.33347	5.39665	5.71267	5.72909	5.438
5.26	5.65092	5.31703	5.65654	5.70427	5.75976	5.32781	5.39099	5.70764	5.72414	5.43246
5.27	5.64577	5.31134	5.65142	5.69925	5.75483	5.32216	5.38533	5.7026	5.7192	5.42692
5.28	5.64063	5.30564	5.64629	5.69423	5.7499	5.3165	5.37967	5.69757	5.71425	5.42138
5.29	5.63549	5.29995	5.64117	5.68921	5.74497	5.31084	5.37401	5.69254	5.7093	5.41584
5.3	5.63034	5.29425	5.63604	5.68419	5.74005	5.30518	5.36835	5.68751	5.70435	5.41029
5.31	5.6252	5.28856	5.63091	5.67917	5.73512	5.29952	5.3627	5.68248	5.69941	5.40475
5.32	5.62006	5.28286	5.62579	5.67414	5.73019	5.29387	5.35704	5.67744	5.69446	5.39921
5.33	5.61491	5.27717	5.62066	5.66912	5.72526	5.28821	5.35138	5.67241	5.68951	5.39367
5.34	5.60977	5.27147	5.61553	5.6641	5.72033	5.28255	5.34572	5.66738	5.68456	5.38813
5.35	5.60463	5.26578	5.61041	5.65908	5.7154	5.27689	5.34006	5.66235	5.67962	5.38259
5.36	5.59948	5.26008	5.60528	5.65406	5.71047	5.27123	5.3344	5.65731	5.67467	5.37705
5.37	5.59434	5.25439	5.60016	5.64904	5.70554	5.26558	5.32874	5.65228	5.66972	5.3715
5.38	5.5892	5.2487	5.59503	5.64402	5.70061	5.25992	5.32308	5.64725	5.66477	5.36596
5.39	5.58405	5.243	5.5899	5.639	5.69568	5.25426	5.31742	5.64222	5.65982	5.36042
5.4	5.57891	5.23731	5.58478	5.63398	5.69075	5.2486	5.31177	5.63718	5.65488	5.35488
5.41	5.57377	5.23161	5.57965	5.62896	5.68583	5.24294	5.30611	5.63215	5.64993	5.34934
5.42	5.56862	5.22592	5.57453	5.62393	5.6809	5.23729	5.30045	5.62712	5.64498	5.3438
5.43	5.56348	5.22022	5.5694	5.61891	5.67597	5.23163	5.29479	5.62209	5.64003	5.33826
5.44	5.55834	5.21453	5.56427	5.61389	5.67104	5.22597	5.28913	5.61706	5.63509	5.33271
5.45	5.55319	5.20883	5.55915	5.60887	5.66611	5.22031	5.28347	5.61202	5.63014	5.32717
5.46	5.54805	5.20314	5.55402	5.60385	5.66118	5.21465	5.27781	5.60699	5.62519	5.32163
5.47	5.5429	5.19744	5.5489	5.59883	5.65625	5.209	5.27215	5.60196	5.62024	5.31609
5.48	5.53776	5.19175	5.54377	5.59381	5.65132	5.20334	5.2665	5.59693	5.6153	5.31055
5.49	5.53262	5.18605	5.53864	5.58879	5.64639	5.19768	5.26084	5.59189	5.61035	5.30501
5.5	5.52747	5.18036	5.53352	5.58377	5.64146	5.19202	5.25518	5.58686	5.6054	5.29946
5.51	5.52233	5.17466	5.52839	5.57874	5.63654	5.18636	5.24952	5.58183	5.60045	5.29392
5.52	5.51719	5.16897	5.52326	5.57372	5.63161	5.18071	5.24386	5.5768	5.59551	5.28838
5.53	5.51204	5.16328	5.51814	5.5687	5.62668	5.17505	5.2382	5.57176	5.59056	5.28284
5.54	5.5069	5.15758	5.51301	5.56368	5.62175	5.16939	5.23254	5.56673	5.58561	5.2773
5.55	5.50176	5.15189	5.50789	5.55866	5.61682	5.16373	5.22688	5.5617	5.58066	5.27176
5.56	5.49661	5.14619	5.50276	5.55364	5.61189	5.15807	5.22122	5.55667	5.57572	5.26622
5.57	5.49147	5.1405	5.49763	5.54862	5.60696	5.15242	5.21557	5.55164	5.57077	5.26067
5.58	5.48633	5.1348	5.49251	5.5436	5.60203	5.14676	5.20991	5.5466	5.56582	5.25513
5.59	5.48118	5.12911	5.48738	5.53858	5.5971	5.1411	5.20425	5.54157	5.56087	5.24959
5.6	5.47604	5.12341	5.48226	5.53356	5.59217	5.13544	5.19859	5.53654	5.55593	5.24405
5.61	5.4709	5.11772	5.47713	5.52853	5.58725	5.12978	5.19293	5.53151	5.55098	5.23851
5.62	5.46575	5.11202	5.472	5.52351	5.58232	5.12413	5.18727	5.52647	5.54603	5.23297
5.63	5.46061	5.10633	5.46688	5.51849	5.57739	5.11847	5.18161	5.52144	5.54108	5.22742
5.64	5.45547	5.10063	5.46175	5.51347	5.57246	5.11281	5.17595	5.51641	5.53614	5.22188
5.65	5.45032	5.09494	5.45663	5.50845	5.56753	5.10715	5.1703	5.51138	5.53119	5.21634
5.66	5.44518	5.08924	5.4515	5.50343	5.5626	5.10149	5.16464	5.50634	5.52624	5.2108
5.67	5.44004	5.08355	5.44637	5.49841	5.55767	5.09584	5.15898	5.50131	5.52129	5.20526
5.68	5.43489	5.07785	5.44125	5.49339	5.55274	5.09018	5.15332	5.49628	5.51635	5.19972
5.69	5.42975	5.07216	5.43612	5.48837	5.54781	5.08452	5.14766	5.49125	5.5114	5.19418
5.7	5.4246	5.06647	5.431	5.48334	5.54288	5.07886	5.142	5.48622	5.50645	5.18863
5.71	5.41946	5.06077	5.42587	5.47832	5.53796	5.0732	5.13634	5.48118	5.5015	5.18309
5.72	5.41432	5.05508	5.42074	5.4733	5.53303	5.06754	5.13068	5.47615	5.49656	5.17755
5.73	5.40917	5.04938	5.41562	5.46828	5.5281	5.06189	5.12502	5.47112	5.49161	5.17201
5.74	5.40403	5.04369	5.41049	5.46326	5.52317	5.05623	5.11937	5.46609	5.48666	5.16647
5.75	5.39889	5.03799	5.40536	5.45824	5.51824	5.05057	5.11371	5.46105	5.48171	5.16093
5.76	5.39374	5.0323	5.40024	5.45322	5.51331	5.04491	5.10805	5.45602	5.47676	5.15539
5.77	5.3886	5.0266	5.39511	5.4482	5.50838	5.03925	5.10239	5.45099	5.47182	5.14984
5.78	5.38346	5.02091	5.38999	5.44318	5.50345	5.0336	5.09673	5.44596	5.46687	5.1443
5.79	5.37831	5.01521	5.38486	5.43816	5.49852	5.02794	5.09107	5.44092	5.46192	5.13876
5.8	5.37317	5.00952	5.37973	5.43313	5.49359	5.02228	5.08541	5.43589	5.45697	5.13322
5.81	5.36803	5.00382	5.37461	5.42811	5.48866	5.01662	5.07975	5.43086	5.45203	5.12768
5.82	5.36288	4.99813	5.36948	5.42309	5.48374	5.01096	5.0741	5.42583	5.44708	5.12214
5.83	5.35774	4.99243	5.36436	5.41807	5.47881	5.00531	5.06844	5.4208	5.44213	5.11659
5.84	5.3526	4.98674	5.35923	5.41305	5.47388	4.99965	5.06278	5.41576	5.43718	5.11105
5.85	5.34745	4.98105	5.3541	5.40803	5.46895	4.99399	5.05712	5.41073	5.43224	5.10551
5.86	5.34231	4.97535	5.34898	5.40301	5.46402	4.98833	5.05146	5.4057	5.42729	5.09997
5.87	5.33717	4.96966	5.34385	5.39799	5.45909	4.98267	5.0458	5.40067	5.42234	5.09443
5.88	5.33202	4.96396	5.33873	5.39297	5.45416	4.97702	5.04014	5.39563	5.41739	5.08889
5.89	5.32688	4.95827	5.3336	5.38794	5.44923	4.97136	5.03448	5.3906	5.41245	5.08335
5.9	5.32173	4.95257	5.32847	5.38292	5.4443	4.9657	5.02883	5.38557	5.4075	5.0778
5.91	5.31659	4.94688	5.32335	5.3779	5.43937	4.96004	5.02317	5.38054	5.40255	5.07226
5.92	5.31145	4.94118	5.31822	5.37288	5.43445	4.95438	5.01751	5.37551	5.3976	5.06672
5.93	5.3063	4.93549	5.31309	5.36786	5.42952	4.94873	5.01185	5.37047	5.39266	5.06118
5.94	5.30116	4.92979	5.30797	5.36284	5.42459	4.94307	5.00619	5.36544	5.38771	5.05564
5.95	5.29602	4.9241	5.30284	5.35782	5.41966	4.93741	5.00053	5.36041	5.38276	5.0501
5.96	5.29087	4.9184	5.29772	5.3528	5.41473	4.93175	4.99487	5.35538	5.37781	5.04456
5.97	5.28573	4.91271	5.29259	5.34778	5.4098	4.92609	4.98921	5.35034	5.37287	5.03901
5.98	5.28059	4.90701	5.28746	5.34276	5.40487	4.92044	4.98355	5.34531	5.36792	5.03347
5.99	5.27544	4.90132	5.28234	5.33773	5.39994	4.91478	4.9779	5.34028	5.36297	5.02793
6	5.2703	4.89562	5.27721	5.33271	5.39501	4.90912	4.97224	5.33525	5.35802	5.02239
6.01	5.26516	4.88993	5.27209	5.32769	5.39008	4.90346	4.96658	5.33021	5.35308	5.01685
6.02	5.26001	4.88424	5.26696	5.32267	5.38516	4.8978	4.96092	5.32518	5.34813	5.01131
6.03	5.25487	4.87854	5.26183	5.31765	5.38023	4.89215	4.95526	5.32015	5.34318	5.00576
6.04	5.24973	4.87285	5.25671	5.31263	5.3753	4.88649	4.9496	5.31512	5.33823	5.00022
6.05	5.24458	4.86715	5.25158	5.30761	5.37037	4.88083	4.94394	5.31009	5.33329	4.99468
6.06	5.23944	4.86146	5.24646	5.30259	5.36544	4.87517	4.93828	5.30505	5.32834	4.98914
6.07	5.2343	4.85576	5.24133	5.29757	5.36051	4.86951	4.93263	5.30002	5.32339	4.9836
6.08	5.22915	4.85007	5.2362	5.29254	5.35558	4.86386	4.92697	5.29499	5.31844	4.97806
6.09	5.22401	4.84437	5.23108	5.28752	5.35065	4.8582	4.92131	5.28996	5.3135	4.97252
6.1	5.21887	4.83868	5.22595	5.2825	5.34572	4.85254	4.91565	5.28492	5.30855	4.96697
6.11	5.21372	4.83298	5.22082	5.27748	5.34079	4.84688	4.90999	5.27989	5.3036	4.96143
6.12	5.20858	4.82729	5.2157	5.27246	5.33587	4.84122	4.90433	5.27486	5.29865	4.95589
6.13	5.20343	4.82159	5.21057	5.26744	5.33094	4.83557	4.89867	5.26983	5.2937	4.95035
6.14	5.19829	4.8159	5.20545	5.26242	5.32601	4.82991	4.89301	5.26479	5.28876	4.94481
6.15	5.19315	4.8102	5.20032	5.2574	5.32108	4.82425	4.88735	5.25976	5.28381	4.93927
6.16	5.188	4.80451	5.19519	5.25238	5.31615	4.81859	4.8817	5.25473	5.27886	4.93372
6.17	5.18286	4.79882	5.19007	5.24736	5.31122	4.81293	4.87604	5.2497	5.27391	4.92818
6.18	5.17772	4.79312	5.18494	5.24233	5.30629	4.80728	4.87038	5.24467	5.26897	4.92264
6.19	5.17257	4.78743	5.17982	5.23731	5.30136	4.80162	4.86472	5.23963	5.26402	4.9171
6.2	5.16743	4.78173	5.17469	5.23229	5.29643	4.79596	4.85906	5.2346	5.25907	4.91156
6.21	5.16229	4.77604	5.16956	5.22727	5.2915	4.7903	4.8534	5.22957	5.25412	4.90602
6.22	5.15714	4.77034	5.16444	5.22225	5.28657	4.78464	4.84774	5.22454	5.24918	4.90048
6.23	5.152	4.76465	5.15931	5.21723	5.28165	4.77899	4.84208	5.2195	5.24423	4.89493
6.24	5.14686	4.75895	5.15419	5.21221	5.27672	4.77333	4.83643	5.21447	5.23928	4.88939
6.25	5.14171	4.75326	5.14906	5.20719	5.27179	4.76767	4.83077	5.20944	5.23433	4.88385
6.26	5.13657	4.74756	5.14393	5.20217	5.26686	4.76201	4.82511	5.20441	5.22939	4.87831
6.27	5.13143	4.74187	5.13881	5.19714	5.26193	4.75635	4.81945	5.19937	5.22444	4.87277
6.28	5.12628	4.73617	5.13368	5.19212	5.257	4.7507	4.81379	5.19434	5.21949	4.86723
6.29	5.12114	4.73048	5.12855	5.1871	5.25207	4.74504	4.80813	5.18931	5.21454	4.86169
6.3	5.116	4.72478	5.12343	5.18208	5.24714	4.73938	4.80247	5.18428	5.2096	4.85614
6.31	5.11085	4.71909	5.1183	5.17706	5.24221	4.73372	4.79681	5.17925	5.20465	4.8506
6.32	5.10571	4.71339	5.11318	5.17204	5.23728	4.72806	4.79115	5.17421	5.1997	4.84506
6.33	5.10057	4.7077	5.10805	5.16702	5.23236	4.7224	4.7855	5.16918	5.19475	4.83952
6.34	5.09542	4.70201	5.10292	5.162	5.22743	4.71675	4.77984	5.16415	5.18981	4.83398
6.35	5.09028	4.69631	5.0978	5.15698	5.2225	4.71109	4.77418	5.15912	5.18486	4.82844
6.36	5.08513	4.69062	5.09267	5.15196	5.21757	4.70543	4.76852	5.15408	5.17991	4.82289
6.37	5.07999	4.68492	5.08755	5.14693	5.21264	4.69977	4.76286	5.14905	5.17496	4.81735
6.38	5.07485	4.67923	5.08242	5.14191	5.20771	4.69411	4.7572	5.14402	5.17002	4.81181
6.39	5.0697	4.67353	5.07729	5.13689	5.20278	4.68846	4.75154	5.13899	5.16507	4.80627
6.4	5.06456	4.66784	5.07217	5.13187	5.19785	4.6828	4.74588	5.13395	5.16012	4.80073
6.41	5.05942	4.66214	5.06704	5.12685	5.19292	4.67714	4.74023	5.12892	5.15517	4.79519
6.42	5.05427	4.65645	5.06192	5.12183	5.18799	4.67148	4.73457	5.12389	5.15023	4.78965
6.43	5.04913	4.65075	5.05679	5.11681	5.18307	4.66582	4.72891	5.11886	5.14528	4.7841
6.44	5.04399	4.64506	5.05166	5.11179	5.17814	4.66017	4.72325	5.11383	5.14033	4.77856
6.45	5.03884	4.63936	5.04654	5.10677	5.17321	4.65451	4.71759	5.10879	5.13538	4.77302
6.46	5.0337	4.63367	5.04141	5.10174	5.16828	4.64885	4.71193	5.10376	5.13043	4.76748
6.47	5.02856	4.62797	5.03628	5.09672	5.16335	4.64319	4.70627	5.09873	5.12549	4.76194
6.48	5.02341	4.62228	5.03116	5.0917	5.15842	4.63753	4.70061	5.0937	5.12054	4.7564
6.49	5.01827	4.61659	5.02603	5.08668	5.15349	4.63188	4.69496	5.08866	5.11559	4.75085
6.5	5.01313	4.61089	5.02091	5.08166	5.14856	4.62622	4.6893	5.08363	5.11064	4.74531
6.51	5.00798	4.6052	5.01578	5.07664	5.14363	4.62056	4.68364	5.0786	5.1057	4.73977
6.52	5.00284	4.5995	5.01065	5.07162	5.1387	4.6149	4.67798	5.07357	5.10075	4.73423
6.53	4.9977	4.59381	5.00553	5.0666	5.13377	4.60924	4.67232	5.06853	5.0958	4.72869
6.54	4.99255	4.58811	5.0004	5.06158	5.12885	4.60359	4.66666	5.0635	5.09085	4.72315
6.55	4.98741	4.58242	4.99528	5.05656	5.12392	4.59793	4.661	5.05847	5.08591	4.71761
6.56	4.98227	4.57672	4.99015	5.05153	5.11899	4.59227	4.65534	5.05344	5.08096	4.71206
6.57	4.97712	4.57103	4.98502	5.04651	5.11406	4.58661	4.64968	5.04841	5.07601	4.70652
6.58	4.97198	4.56533	4.9799	5.04149	5.10913	4.58095	4.64403	5.04337	5.07106	4.70098
6.59	4.96683	4.55964	4.97477	5.03647	5.1042	4.5753	4.63837	5.03834	5.06612	4.69544
6.6	4.96169	4.55394	4.96965	5.03145	5.09927	4.56964	4.63271	5.03331	5.06117	4.6899
6.61	4.95655	4.54825	4.96452	5.02643	5.09434	4.56398	4.62705	5.02828	5.05622	4.68436
6.62	4.9514	4.54255	4.95939	5.02141	5.08941	4.55832	4.62139	5.02324	5.05127	4.67882
6.63	4.94626	4.53686	4.95427	5.01639	5.08448	4.55266	4.61573	5.01821	5.04633	4.67327
6.64	4.94112	4.53116	4.94914	5.01137	5.07956	4.54701	4.61007	5.01318	5.04138	4.66773
6.65	4.93597	4.52547	4.94401	5.00634	5.07463	4.54135	4.60441	5.00815	5.03643	4.66219
6.66	4.93083	4.51978	4.93889	5.00132	5.0697	4.53569	4.59876	5.00311	5.03148	4.65665
6.67	4.92569	4.51408	4.93376	4.9963	5.06477	4.53003	4.5931	4.99808	5.02654	4.65111
6.68	4.92054	4.50839	4.92864	4.99128	5.05984	4.52437	4.58744	4.99305	5.02159	4.64557
6.69	4.9154	4.50269	4.92351	4.98626	5.05491	4.51872	4.58178	4.98802	5.01664	4.64002
6.7	4.91026	4.497	4.91838	4.98124	5.04998	4.51306	4.57612	4.98299	5.01169	4.63448
6.71	4.90511	4.4913	4.91326	4.97622	5.04505	4.5074	4.57046	4.97795	5.00675	4.62894
6.72	4.89997	4.48561	4.90813	4.9712	5.04012	4.50174	4.5648	4.97292	5.0018	4.6234
6.73	4.89483	4.47991	4.90301	4.96618	5.03519	4.49608	4.55914	4.96789	4.99685	4.61786
6.74	4.88968	4.47422	4.89788	4.96116	5.03027	4.49043	4.55348	4.96286	4.9919	4.61232
6.75	4.88454	4.46852	4.89275	4.95613	5.02534	4.48477	4.54783	4.95782	4.98696	4.60678
6.76	4.8794	4.46283	4.88763	4.95111	5.02041	4.47911	4.54217	4.95279	4.98201	4.60123
6.77	4.87425	4.45713	4.8825	4.94609	5.01548	4.47345	4.53651	4.94776	4.97706	4.59569
6.78	4.86911	4.45144	4.87738	4.94107	5.01055	4.46779	4.53085	4.94273	4.97211	4.59015
6.79	4.86397	4.44574	4.87225	4.93605	5.00562	4.46214	4.52519	4.93769	4.96717	4.58461
6.8	4.85882	4.44005	4.86712	4.93103	5.00069	4.45648	4.51953	4.93266	4.96222	4.57907
6.81	4.85368	4.43436	4.862	4.92601	4.99576	4.45082	4.51387	4.92763	4.95727	4.57353
6.82	4.84853	4.42866	4.85687	4.92099	4.99083	4.44516	4.50821	4.9226	4.95232	4.56799
6.83	4.84339	4.42297	4.85174	4.91597	4.9859	4.4395	4.50256	4.91757	4.94737	4.56244
6.84	4.83825	4.41727	4.84662	4.91094	4.98098	4.43385	4.4969	4.91253	4.94243	4.5569
6.85	4.8331	4.41158	4.84149	4.90592	4.97605	4.42819	4.49124	4.9075	4.93748	4.55136
6.86	4.82796	4.40588	4.83637	4.9009	4.97112	4.42253	4.48558	4.90247	4.93253	4.54582
6.87	4.82282	4.40019	4.83124	4.89588	4.96619	4.41687	4.47992	4.89744	4.92758	4.54028
6.88	4.81767	4.39449	4.82611	4.89086	4.96126	4.41121	4.47426	4.8924	4.92264	4.53474
6.89	4.81253	4.3888	4.82099	4.88584	4.95633	4.40556	4.4686	4.88737	4.91769	4.52919
6.9	4.80739	4.3831	4.81586	4.88082	4.9514	4.3999	4.46294	4.88234	4.91274	4.52365
6.91	4.80224	4.37741	4.81074	4.8758	4.94647	4.39424	4.45728	4.87731	4.90779	4.51811
6.92	4.7971	4.37171	4.80561	4.87078	4.94154	4.38858	4.45163	4.87228	4.90285	4.51257
6.93	4.79196	4.36602	4.80048	4.86576	4.93661	4.38292	4.44597	4.86724	4.8979	4.50703
6.94	4.78681	4.36032	4.79536	4.86073	4.93168	4.37726	4.44031	4.86221	4.89295	4.50149
6.95	4.78167	4.35463	4.79023	4.85571	4.92676	4.37161	4.43465	4.85718	4.888	4.49595
6.96	4.77653	4.34894	4.78511	4.85069	4.92183	4.36595	4.42899	4.85215	4.88306	4.4904
6.97	4.77138	4.34324	4.77998	4.84567	4.9169	4.36029	4.42333	4.84711	4.87811	4.48486
6.98	4.76624	4.33755	4.77485	4.84065	4.91197	4.35463	4.41767	4.84208	4.87316	4.47932
6.99	4.7611	4.33185	4.76973	4.83563	4.90704	4.34897	4.41201	4.83705	4.86821	4.47378
7	4.75595	4.32616	4.7646	4.83061	4.90211	4.34332	4.40636	4.83202	4.86327	4.46824
7.01	4.75081	4.32046	4.75947	4.82559	4.89718	4.33766	4.4007	4.82698	4.85832	4.4627
7.02	4.74567	4.31477	4.75435	4.82057	4.89225	4.332	4.39504	4.82195	4.85337	4.45715
7.03	4.74052	4.30907	4.74922	4.81554	4.88732	4.32634	4.38938	4.81692	4.84842	4.45161
7.04	4.73538	4.30338	4.7441	4.81052	4.88239	4.32068	4.38372	4.81189	4.84348	4.44607
7.05	4.73023	4.29768	4.73897	4.8055	4.87747	4.31503	4.37806	4.80686	4.83853	4.44053
7.06	4.72509	4.29199	4.73384	4.80048	4.87254	4.30937	4.3724	4.80182	4.83358	4.43499
7.07	4.71995	4.28629	4.72872	4.79546	4.86761	4.30371	4.36674	4.79679	4.82863	4.42945
7.08	4.7148	4.2806	4.72359	4.79044	4.86268	4.29805	4.36109	4.79176	4.82369	4.42391
7.09	4.70966	4.2749	4.71847	4.78542	4.85775	4.29239	4.35543	4.78673	4.81874	4.41836
7.1	4.70452	4.26921	4.71334	4.7804	4.85282	4.28674	4.34977	4.78169	4.81379	4.41282
7.11	4.69937	4.26351	4.70821	4.77538	4.84789	4.28108	4.34411	4.77666	4.80884	4.40728
7.12	4.69423	4.25782	4.70309	4.77036	4.84296	4.27542	4.33845	4.77163	4.8039	4.40174
7.13	4.68909	4.25213	4.69796	4.76533	4.83803	4.26976	4.33279	4.7666	4.79895	4.3962
7.14	4.68394	4.24643	4.69284	4.76031	4.8331	4.2641	4.32713	4.76156	4.794	4.39066
7.15	4.6788	4.24074	4.68771	4.75529	4.82818	4.25845	4.32147	4.75653	4.78905	4.38512
7.16	4.67366	4.23504	4.68258	4.75027	4.82325	4.25279	4.31581	4.7515	4.78411	4.37957
7.17	4.66851	4.22935	4.67746	4.74525	4.81832	4.24713	4.31016	4.74647	4.77916	4.37403
7.18	4.66337	4.22365	4.67233	4.74023	4.81339	4.24147	4.3045	4.74144	4.77421	4.36849
7.19	4.65823	4.21796	4.6672	4.73521	4.80846	4.23581	4.29884	4.7364	4.76926	4.36295
7.2	4.65308	4.21226	4.66208	4.73019	4.80353	4.23016	4.29318	4.73137	4.76431	4.35741
7.21	4.64794	4.20657	4.65695	4.72517	4.7986	4.2245	4.28752	4.72634	4.75937	4.35187
7.22	4.6428	4.20087	4.65183	4.72014	4.79367	4.21884	4.28186	4.72131	4.75442	4.34632
7.23	4.63765	4.19518	4.6467	4.71512	4.78874	4.21318	4.2762	4.71627	4.74947	4.34078
7.24	4.63251	4.18948	4.64157	4.7101	4.78381	4.20752	4.27054	4.71124	4.74452	4.33524
7.25	4.62737	4.18379	4.63645	4.70508	4.77889	4.20187	4.26489	4.70621	4.73958	4.3297
7.26	4.62222	4.17809	4.63132	4.70006	4.77396	4.19621	4.25923	4.70118	4.73463	4.32416
7.27	4.61708	4.1724	4.6262	4.69504	4.76903	4.19055	4.25357	4.69614	4.72968	4.31862
7.28	4.61193	4.16671	4.62107	4.69002	4.7641	4.18489	4.24791	4.69111	4.72473	4.31308
7.29	4.60679	4.16101	4.61594	4.685	4.75917	4.17923	4.24225	4.68608	4.71979	4.30753
7.3	4.60165	4.15532	4.61082	4.67998	4.75424	4.17358	4.23659	4.68105	4.71484	4.30199
7.31	4.5965	4.14962	4.60569	4.67496	4.74931	4.16792	4.23093	4.67602	4.70989	4.29645
7.32	4.59136	4.14393	4.60057	4.66993	4.74438	4.16226	4.22527	4.67098	4.70494	4.29091
7.33	4.58622	4.13823	4.59544	4.66491	4.73945	4.1566	4.21961	4.66595	4.7	4.28537
7.34	4.58107	4.13254	4.59031	4.65989	4.73452	4.15094	4.21396	4.66092	4.69505	4.27983
7.35	4.57593	4.12684	4.58519	4.65487	4.72959	4.14529	4.2083	4.65589	4.6901	4.27429
7.36	4.57079	4.12115	4.58006	4.64985	4.72467	4.13963	4.20264	4.65085	4.68515	4.26874
7.37	4.56564	4.11545	4.57493	4.64483	4.71974	4.13397	4.19698	4.64582	4.68021	4.2632
7.38	4.5605	4.10976	4.56981	4.63981	4.71481	4.12831	4.19132	4.64079	4.67526	4.25766
7.39	4.55536	4.10406	4.56468	4.63479	4.70988	4.12265	4.18566	4.63576	4.67031	4.25212
7.4	4.55021	4.09837	4.55956	4.62977	4.70495	4.117	4.18	4.63072	4.66536	4.24658
7.41	4.54507	4.09267	4.55443	4.62474	4.70002	4.11134	4.17434	4.62569	4.66042	4.24104
7.42	4.53993	4.08698	4.5493	4.61972	4.69509	4.10568	4.16869	4.62066	4.65547	4.23549
7.43	4.53478	4.08128	4.54418	4.6147	4.69016	4.10002	4.16303	4.61563	4.65052	4.22995
7.44	4.52964	4.07559	4.53905	4.60968	4.68523	4.09436	4.15737	4.6106	4.64557	4.22441
7.45	4.5245	4.0699	4.53393	4.60466	4.6803	4.08871	4.15171	4.60556	4.64063	4.21887
7.46	4.51935	4.0642	4.5288	4.59964	4.67538	4.08305	4.14605	4.60053	4.63568	4.21333
7.47	4.51421	4.05851	4.52367	4.59462	4.67045	4.07739	4.14039	4.5955	4.63073	4.20779
7.48	4.50907	4.05281	4.51855	4.5896	4.66552	4.07173	4.13473	4.59047	4.62578	4.20225
7.49	4.50392	4.04712	4.51342	4.58458	4.66059	4.06607	4.12907	4.58543	4.62084	4.1967
7.5	4.49878	4.04142	4.5083	4.57956	4.65566	4.06042	4.12341	4.5804	4.61589	4.19116
7.51	4.49363	4.03573	4.50317	4.57453	4.65073	4.05476	4.11776	4.57537	4.61094	4.18562
7.52	4.48849	4.03003	4.49804	4.56951	4.6458	4.0491	4.1121	4.57034	4.60599	4.18008
7.53	4.48335	4.02434	4.49292	4.56449	4.64087	4.04344	4.10644	4.5653	4.60105	4.17454
7.54	4.4782	4.01864	4.48779	4.55947	4.63594	4.03778	4.10078	4.56027	4.5961	4.169
7.55	4.47306	4.01295	4.48267	4.55445	4.63101	4.03213	4.09512	4.55524	4.59115	4.16345
7.56	4.46792	4.00725	4.47754	4.54943	4.62609	4.02647	4.08946	4.55021	4.5862	4.15791
7.57	4.46277	4.00156	4.47241	4.54441	4.62116	4.02081	4.0838	4.54518	4.58125	4.15237
7.58	4.45763	3.99586	4.46729	4.53939	4.61623	4.01515	4.07814	4.54014	4.57631	4.14683
7.59	4.45249	3.99017	4.46216	4.53437	4.6113	4.00949	4.07249	4.53511	4.57136	4.14129
7.6	4.44734	3.98448	4.45703	4.52934	4.60637	4.00383	4.06683	4.53008	4.56641	4.13575
7.61	4.4422	3.97878	4.45191	4.52432	4.60144	3.99818	4.06117	4.52505	4.56146	4.13021
7.62	4.43706	3.97309	4.44678	4.5193	4.59651	3.99252	4.05551	4.52001	4.55652	4.12466
7.63	4.43191	3.96739	4.44166	4.51428	4.59158	3.98686	4.04985	4.51498	4.55157	4.11912
7.64	4.42677	3.9617	4.43653	4.50926	4.58665	3.9812	4.04419	4.50995	4.54662	4.11358
7.65	4.42163	3.956	4.4314	4.50424	4.58172	3.97554	4.03853	4.50492	4.54167	4.10804
7.66	4.41648	3.95031	4.42628	4.49922	4.5768	3.96989	4.03287	4.49988	4.53673	4.1025
7.67	4.41134	3.94461	4.42115	4.4942	4.57187	3.96423	4.02722	4.49485	4.53178	4.09696
7.68	4.4062	3.93892	4.41603	4.48918	4.56694	3.95857	4.02156	4.48982	4.52683	4.09142
7.69	4.40105	3.93322	4.4109	4.48416	4.56201	3.95291	4.0159	4.48479	4.52188	4.08587
7.7	4.39591	3.92753	4.40577	4.47913	4.55708	3.94725	4.01024	4.47976	4.51694	4.08033
7.71	4.39077	3.92183	4.40065	4.47411	4.55215	3.9416	4.00458	4.47472	4.51199	4.07479
7.72	4.38562	3.91614	4.39552	4.46909	4.54722	3.93594	3.99892	4.46969	4.50704	4.06925
7.73	4.38048	3.91044	4.3904	4.46407	4.54229	3.93028	3.99326	4.46466	4.50209	4.06371
7.74	4.37533	3.90475	4.38527	4.45905	4.53736	3.92462	3.9876	4.45963	4.49715	4.05817
7.75	4.37019	3.89905	4.38014	4.45403	4.53243	3.91896	3.98194	4.45459	4.4922	4.05262
7.76	4.36505	3.89336	4.37502	4.44901	4.5275	3.91331	3.97629	4.44956	4.48725	4.04708
7.77	4.3599	3.88767	4.36989	4.44399	4.52258	3.90765	3.97063	4.44453	4.4823	4.04154
7.78	4.35476	3.88197	4.36476	4.43897	4.51765	3.90199	3.96497	4.4395	4.47736	4.036
7.79	4.34962	3.87628	4.35964	4.43394	4.51272	3.89633	3.95931	4.43446	4.47241	4.03046
7.8	4.34447	3.87058	4.35451	4.42892	4.50779	3.89067	3.95365	4.42943	4.46746	4.02492
7.81	4.33933	3.86489	4.34939	4.4239	4.50286	3.88502	3.94799	4.4244	4.46251	4.01938
7.82	4.33419	3.85919	4.34426	4.41888	4.49793	3.87936	3.94233	4.41937	4.45757	4.01383
7.83	4.32904	3.8535	4.33913	4.41386	4.493	3.8737	3.93667	4.41434	4.45262	4.00829
7.84	4.3239	3.8478	4.33401	4.40884	4.48807	3.86804	3.93102	4.4093	4.44767	4.00275
7.85	4.31876	3.84211	4.32888	4.40382	4.48314	3.86238	3.92536	4.40427	4.44272	3.99721
7.86	4.31361	3.83641	4.32376	4.3988	4.47821	3.85673	3.9197	4.39924	4.43778	3.99167
7.87	4.30847	3.83072	4.31863	4.39378	4.47329	3.85107	3.91404	4.39421	4.43283	3.98613
7.88	4.30333	3.82502	4.3135	4.38876	4.46836	3.84541	3.90838	4.38917	4.42788	3.98058
7.89	4.29818	3.81933	4.30838	4.38373	4.46343	3.83975	3.90272	4.38414	4.42293	3.97504
7.9	4.29304	3.81363	4.30325	4.37871	4.4585	3.83409	3.89706	4.37911	4.41798	3.9695
7.91	4.2879	3.80794	4.29813	4.37369	4.45357	3.82844	3.8914	4.37408	4.41304	3.96396
7.92	4.28275	3.80225	4.293	4.36867	4.44864	3.82278	3.88574	4.36905	4.40809	3.95842
7.93	4.27761	3.79655	4.28787	4.36365	4.44371	3.81712	3.88009	4.36401	4.40314	3.95288
7.94	4.27247	3.79086	4.28275	4.35863	4.43878	3.81146	3.87443	4.35898	4.39819	3.94734
7.95	4.26732	3.78516	4.27762	4.35361	4.43385	3.8058	3.86877	4.35395	4.39325	3.94179
7.96	4.26218	3.77947	4.27249	4.34859	4.42892	3.80015	3.86311	4.34892	4.3883	3.93625
7.97	4.25703	3.77377	4.26737	4.34357	4.424	3.79449	3.85745	4.34388	4.38335	3.93071
7.98	4.25189	3.76808	4.26224	4.33854	4.41907	3.78883	3.85179	4.33885	4.3784	3.92517
7.99	4.24675	3.76238	4.25712	4.33352	4.41414	3.78317	3.84613	4.33382	4.37346	3.91963
8	4.2416	3.75669	4.25199	4.3285	4.40921	3.77751	3.84047	4.32879	4.36851	3.91409
8.01	4.23646	3.75099	4.24686	4.32348	4.40428	3.77186	3.83482	4.32375	4.36356	3.90855
8.02	4.23132	3.7453	4.24174	4.31846	4.39935	3.7662	3.82916	4.31872	4.35861	3.903
8.03	4.22617	3.7396	4.23661	4.31344	4.39442	3.76054	3.8235	4.31369	4.35367	3.89746
8.04	4.22103	3.73391	4.23149	4.30842	4.38949	3.75488	3.81784	4.30866	4.34872	3.89192
8.05	4.21589	3.72821	4.22636	4.3034	4.38456	3.74922	3.81218	4.30363	4.34377	3.88638
8.06	4.21074	3.72252	4.22123	4.29838	4.37963	3.74357	3.80652	4.29859	4.33882	3.88084
8.07	4.2056	3.71682	4.21611	4.29336	4.37471	3.73791	3.80086	4.29356	4.33388	3.8753
8.08	4.20046	3.71113	4.21098	4.28833	4.36978	3.73225	3.7952	4.28853	4.32893	3.86975
8.09	4.19531	3.70544	4.20586	4.28331	4.36485	3.72659	3.78954	4.2835	4.32398	3.86421
8.1	4.19017	3.69974	4.20073	4.27829	4.35992	3.72093	3.78389	4.27846	4.31903	3.85867
8.11	4.18503	3.69405	4.1956	4.27327	4.35499	3.71528	3.77823	4.27343	4.31409	3.85313
8.12	4.17988	3.68835	4.19048	4.26825	4.35006	3.70962	3.77257	4.2684	4.30914	3.84759
8.13	4.17474	3.68266	4.18535	4.26323	4.34513	3.70396	3.76691	4.26337	4.30419	3.84205
8.14	4.1696	3.67696	4.18022	4.25821	4.3402	3.6983	3.76125	4.25833	4.29924	3.83651
8.15	4.16445	3.67127	4.1751	4.25319	4.33527	3.69264	3.75559	4.2533	4.2943	3.83096
8.16	4.15931	3.66557	4.16997	4.24817	4.33034	3.68699	3.74993	4.24827	4.28935	3.82542
8.17	4.15417	3.65988	4.16485	4.24314	4.32541	3.68133	3.74427	4.24324	4.2844	3.81988
8.18	4.14902	3.65418	4.15972	4.23812	4.32049	3.67567	3.73862	4.23821	4.27945	3.81434
8.19	4.14388	3.64849	4.15459	4.2331	4.31556	3.67001	3.73296	4.23317	4.27451	3.8088
8.2	4.13873	3.64279	4.14947	4.22808	4.31063	3.66435	3.7273	4.22814	4.26956	3.80326
8.21	4.13359	3.6371	4.14434	4.22306	4.3057	3.65869	3.72164	4.22311	4.26461	3.79772
8.22	4.12845	3.6314	4.13922	4.21804	4.30077	3.65304	3.71598	4.21808	4.25966	3.79217
8.23	4.1233	3.62571	4.13409	4.21302	4.29584	3.64738	3.71032	4.21304	4.25472	3.78663
8.24	4.11816	3.62002	4.12896	4.208	4.29091	3.64172	3.70466	4.20801	4.24977	3.78109
8.25	4.11302	3.61432	4.12384	4.20298	4.28598	3.63606	3.699	4.20298	4.24482	3.77555
8.26	4.10787	3.60863	4.11871	4.19796	4.28105	3.6304	3.69335	4.19795	4.23987	3.77001
8.27	4.10273	3.60293	4.11359	4.19293	4.27612	3.62475	3.68769	4.19291	4.23492	3.76447
8.28	4.09759	3.59724	4.10846	4.18791	4.2712	3.61909	3.68203	4.18788	4.22998	3.75892
8.29	4.09244	3.59154	4.10333	4.18289	4.26627	3.61343	3.67637	4.18285	4.22503	3.75338
8.3	4.0873	3.58585	4.09821	4.17787	4.26134	3.60777	3.67071	4.17782	4.22008	3.74784
8.31	4.08216	3.58015	4.09308	4.17285	4.25641	3.60211	3.66505	4.17279	4.21513	3.7423
8.32	4.07701	3.57446	4.08795	4.16783	4.25148	3.59646	3.65939	4.16775	4.21019	3.73676
8.33	4.07187	3.56876	4.08283	4.16281	4.24655	3.5908	3.65373	4.16272	4.20524	3.73122
8.34	4.06673	3.56307	4.0777	4.15779	4.24162	3.58514	3.64807	4.15769	4.20029	3.72568
8.35	4.06158	3.55737	4.07258	4.15277	4.23669	3.57948	3.64242	4.15266	4.19534	3.72013
8.36	4.05644	3.55168	4.06745	4.14774	4.23176	3.57382	3.63676	4.14762	4.1904	3.71459
8.37	4.0513	3.54598	4.06232	4.14272	4.22683	3.56817	3.6311	4.14259	4.18545	3.70905
8.38	4.04615	3.54029	4.0572	4.1377	4.22191	3.56251	3.62544	4.13756	4.1805	3.70351
8.39	4.04101	3.53459	4.05207	4.13268	4.21698	3.55685	3.61978	4.13253	4.17555	3.69797
8.4	4.03587	3.5289	4.04695	4.12766	4.21205	3.55119	3.61412	4.12749	4.17061	3.69243
8.41	4.03072	3.52321	4.04182	4.12264	4.20712	3.54553	3.60846	4.12246	4.16566	3.68688
8.42	4.02558	3.51751	4.03669	4.11762	4.20219	3.53988	3.6028	4.11743	4.16071	3.68134
8.43	4.02043	3.51182	4.03157	4.1126	4.19726	3.53422	3.59715	4.1124	4.15576	3.6758
8.44	4.01529	3.50612	4.02644	4.10758	4.19233	3.52856	3.59149	4.10737	4.15082	3.67026
8.45	4.01015	3.50043	4.02132	4.10256	4.1874	3.5229	3.58583	4.10233	4.14587	3.66472
8.46	4.005	3.49473	4.01619	4.09753	4.18247	3.51724	3.58017	4.0973	4.14092	3.65918
8.47	3.99986	3.48904	4.01106	4.09251	4.17754	3.51159	3.57451	4.09227	4.13597	3.65364
8.48	3.99472	3.48334	4.00594	4.08749	4.17262	3.50593	3.56885	4.08724	4.13103	3.64809
8.49	3.98957	3.47765	4.00081	4.08247	4.16769	3.50027	3.56319	4.0822	4.12608	3.64255
8.5	3.98443	3.47195	3.99568	4.07745	4.16276	3.49461	3.55753	4.07717	4.12113	3.63701
8.51	3.97929	3.46626	3.99056	4.07243	4.15783	3.48895	3.55187	4.07214	4.11618	3.63147
8.52	3.97414	3.46056	3.98543	4.06741	4.1529	3.4833	3.54622	4.06711	4.11124	3.62593
8.53	3.969	3.45487	3.98031	4.06239	4.14797	3.47764	3.54056	4.06207	4.10629	3.62039
8.54	3.96386	3.44917	3.97518	4.05737	4.14304	3.47198	3.5349	4.05704	4.10134	3.61485
8.55	3.95871	3.44348	3.97005	4.05234	4.13811	3.46632	3.52924	4.05201	4.09639	3.6093
8.56	3.95357	3.43779	3.96493	4.04732	4.13318	3.46066	3.52358	4.04698	4.09145	3.60376
8.57	3.94843	3.43209	3.9598	4.0423	4.12825	3.45501	3.51792	4.04195	4.0865	3.59822
8.58	3.94328	3.4264	3.95468	4.03728	4.12332	3.44935	3.51226	4.03691	4.08155	3.59268
8.59	3.93814	3.4207	3.94955	4.03226	4.1184	3.44369	3.5066	4.03188	4.0766	3.58714
8.6	3.933	3.41501	3.94442	4.02724	4.11347	3.43803	3.50095	4.02685	4.07166	3.5816
8.61	3.92785	3.40931	3.9393	4.02222	4.10854	3.43237	3.49529	4.02182	4.06671	3.57605
8.62	3.92271	3.40362	3.93417	4.0172	4.10361	3.42672	3.48963	4.01678	4.06176	3.57051
8.63	3.91756	3.39792	3.92905	4.01218	4.09868	3.42106	3.48397	4.01175	4.05681	3.56497
8.64	3.91242	3.39223	3.92392	4.00716	4.09375	3.4154	3.47831	4.00672	4.05186	3.55943
8.65	3.90728	3.38653	3.91879	4.00213	4.08882	3.40974	3.47265	4.00169	4.04692	3.55389
8.66	3.90213	3.38084	3.91367	3.99711	4.08389	3.40408	3.46699	3.99665	4.04197	3.54835
8.67	3.89699	3.37514	3.90854	3.99209	4.07896	3.39843	3.46133	3.99162	4.03702	3.54281
8.68	3.89185	3.36945	3.90341	3.98707	4.07403	3.39277	3.45567	3.98659	4.03207	3.53726
8.69	3.8867	3.36375	3.89829	3.98205	4.06911	3.38711	3.45002	3.98156	4.02713	3.53172
8.7	3.88156	3.35806	3.89316	3.97703	4.06418	3.38145	3.44436	3.97653	4.02218	3.52618
8.71	3.87642	3.35236	3.88804	3.97201	4.05925	3.37579	3.4387	3.97149	4.01723	3.52064
8.72	3.87127	3.34667	3.88291	3.96699	4.05432	3.37014	3.43304	3.96646	4.01228	3.5151
8.73	3.86613	3.34098	3.87778	3.96197	4.04939	3.36448	3.42738	3.96143	4.00734	3.50956
8.74	3.86099	3.33528	3.87266	3.95694	4.04446	3.35882	3.42172	3.9564	4.00239	3.50402
8.75	3.85584	3.32959	3.86753	3.95192	4.03953	3.35316	3.41606	3.95136	3.99744	3.49847
8.76	3.8507	3.32389	3.86241	3.9469	4.0346	3.3475	3.4104	3.94633	3.99249	3.49293
8.77	3.84556	3.3182	3.85728	3.94188	4.02967	3.34185	3.40475	3.9413	3.98755	3.48739
8.78	3.84041	3.3125	3.85215	3.93686	4.02474	3.33619	3.39909	3.93627	3.9826	3.48185
8.79	3.83527	3.30681	3.84703	3.93184	4.01982	3.33053	3.39343	3.93123	3.97765	3.47631
8.8	3.83013	3.30111	3.8419	3.92682	4.01489	3.32487	3.38777	3.9262	3.9727	3.47077
8.81	3.82498	3.29542	3.83678	3.9218	4.00996	3.31921	3.38211	3.92117	3.96776	3.46522
8.82	3.81984	3.28972	3.83165	3.91678	4.00503	3.31355	3.37645	3.91614	3.96281	3.45968
8.83	3.8147	3.28403	3.82652	3.91176	4.0001	3.3079	3.37079	3.91111	3.95786	3.45414
8.84	3.80955	3.27833	3.8214	3.90673	3.99517	3.30224	3.36513	3.90607	3.95291	3.4486
8.85	3.80441	3.27264	3.81627	3.90171	3.99024	3.29658	3.35948	3.90104	3.94797	3.44306
8.86	3.79926	3.26694	3.81114	3.89669	3.98531	3.29092	3.35382	3.89601	3.94302	3.43752
8.87	3.79412	3.26125	3.80602	3.89167	3.98038	3.28526	3.34816	3.89098	3.93807	3.43198
8.88	3.78898	3.25556	3.80089	3.88665	3.97545	3.27961	3.3425	3.88594	3.93312	3.42643
8.89	3.78383	3.24986	3.79577	3.88163	3.97053	3.27395	3.33684	3.88091	3.92818	3.42089
8.9	3.77869	3.24417	3.79064	3.87661	3.9656	3.26829	3.33118	3.87588	3.92323	3.41535
8.91	3.77355	3.23847	3.78551	3.87159	3.96067	3.26263	3.32552	3.87085	3.91828	3.40981
8.92	3.7684	3.23278	3.78039	3.86657	3.95574	3.25697	3.31986	3.86581	3.91333	3.40427
8.93	3.76326	3.22708	3.77526	3.86154	3.95081	3.25132	3.3142	3.86078	3.90839	3.39873
8.94	3.75812	3.22139	3.77014	3.85652	3.94588	3.24566	3.30855	3.85575	3.90344	3.39318
8.95	3.75297	3.21569	3.76501	3.8515	3.94095	3.24	3.30289	3.85072	3.89849	3.38764
8.96	3.74783	3.21	3.75988	3.84648	3.93602	3.23434	3.29723	3.84569	3.89354	3.3821
8.97	3.74269	3.2043	3.75476	3.84146	3.93109	3.22868	3.29157	3.84065	3.8886	3.37656
8.98	3.73754	3.19861	3.74963	3.83644	3.92616	3.22303	3.28591	3.83562	3.88365	3.37102
8.99	3.7324	3.19291	3.74451	3.83142	3.92123	3.21737	3.28025	3.83059	3.8787	3.36548
9	3.72726	3.18722	3.73938	3.8264	3.91631	3.21171	3.27459	3.82556	3.87375	3.35994
9.01	3.72211	3.18152	3.73425	3.82138	3.91138	3.20605	3.26893	3.82052	3.8688	3.35439
9.02	3.71697	3.17583	3.72913	3.81636	3.90645	3.20039	3.26328	3.81549	3.86386	3.34885
9.03	3.71183	3.17013	3.724	3.81133	3.90152	3.19474	3.25762	3.81046	3.85891	3.34331
9.04	3.70668	3.16444	3.71887	3.80631	3.89659	3.18908	3.25196	3.80543	3.85396	3.33777
9.05	3.70154	3.15875	3.71375	3.80129	3.89166	3.18342	3.2463	3.8004	3.84901	3.33223
9.06	3.6964	3.15305	3.70862	3.79627	3.88673	3.17776	3.24064	3.79536	3.84407	3.32669
9.07	3.69125	3.14736	3.7035	3.79125	3.8818	3.1721	3.23498	3.79033	3.83912	3.32115
9.08	3.68611	3.14166	3.69837	3.78623	3.87687	3.16645	3.22932	3.7853	3.83417	3.3156
9.09	3.68096	3.13597	3.69324	3.78121	3.87194	3.16079	3.22366	3.78027	3.82922	3.31006
9.1	3.67582	3.13027	3.68812	3.77619	3.86702	3.15513	3.218	3.77523	3.82428	3.30452
9.11	3.67068	3.12458	3.68299	3.77117	3.86209	3.14947	3.21235	3.7702	3.81933	3.29898
9.12	3.66553	3.11888	3.67787	3.76614	3.85716	3.14381	3.20669	3.76517	3.81438	3.29344
9.13	3.66039	3.11319	3.67274	3.76112	3.85223	3.13816	3.20103	3.76014	3.80943	3.2879
9.14	3.65525	3.10749	3.66761	3.7561	3.8473	3.1325	3.19537	3.7551	3.80449	3.28235
9.15	3.6501	3.1018	3.66249	3.75108	3.84237	3.12684	3.18971	3.75007	3.79954	3.27681
9.16	3.64496	3.0961	3.65736	3.74606	3.83744	3.12118	3.18405	3.74504	3.79459	3.27127
9.17	3.63982	3.09041	3.65224	3.74104	3.83251	3.11552	3.17839	3.74001	3.78964	3.26573
9.18	3.63467	3.08471	3.64711	3.73602	3.82758	3.10987	3.17273	3.73498	3.7847	3.26019
9.19	3.62953	3.07902	3.64198	3.731	3.82265	3.10421	3.16708	3.72994	3.77975	3.25465
9.2	3.62439	3.07333	3.63686	3.72598	3.81773	3.09855	3.16142	3.72491	3.7748	3.24911
9.21	3.61924	3.06763	3.63173	3.72096	3.8128	3.09289	3.15576	3.71988	3.76985	3.24356
9.22	3.6141	3.06194	3.6266	3.71593	3.80787	3.08723	3.1501	3.71485	3.76491	3.23802
9.23	3.60896	3.05624	3.62148	3.71091	3.80294	3.08158	3.14444	3.70981	3.75996	3.23248
9.24	3.60381	3.05055	3.61635	3.70589	3.79801	3.07592	3.13878	3.70478	3.75501	3.22694
9.25	3.59867	3.04485	3.61123	3.70087	3.79308	3.07026	3.13312	3.69975	3.75006	3.2214
9.26	3.59353	3.03916	3.6061	3.69585	3.78815	3.0646	3.12746	3.69472	3.74512	3.21586
9.27	3.58838	3.03346	3.60097	3.69083	3.78322	3.05894	3.1218	3.68968	3.74017	3.21032
9.28	3.58324	3.02777	3.59585	3.68581	3.77829	3.05329	3.11615	3.68465	3.73522	3.20477
9.29	3.5781	3.02207	3.59072	3.68079	3.77336	3.04763	3.11049	3.67962	3.73027	3.19923
9.3	3.57295	3.01638	3.5856	3.67577	3.76843	3.04197	3.10483	3.67459	3.72533	3.19369
9.31	3.56781	3.01068	3.58047	3.67074	3.76351	3.03631	3.09917	3.66956	3.72038	3.18815
9.32	3.56266	3.00499	3.57534	3.66572	3.75858	3.03065	3.09351	3.66452	3.71543	3.18261
9.33	3.55752	2.99929	3.57022	3.6607	3.75365	3.025	3.08785	3.65949	3.71048	3.17707
9.34	3.55238	2.9936	3.56509	3.65568	3.74872	3.01934	3.08219	3.65446	3.70553	3.17152
9.35	3.54723	2.9879	3.55997	3.65066	3.74379	3.01368	3.07653	3.64943	3.70059	3.16598
9.36	3.54209	2.98221	3.55484	3.64564	3.73886	3.00802	3.07088	3.64439	3.69564	3.16044
9.37	3.53695	2.97652	3.54971	3.64062	3.73393	3.00236	3.06522	3.63936	3.69069	3.1549
9.38	3.5318	2.97082	3.54459	3.6356	3.729	2.99671	3.05956	3.63433	3.68574	3.14936
9.39	3.52666	2.96513	3.53946	3.63058	3.72407	2.99105	3.0539	3.6293	3.6808	3.14382
9.4	3.52152	2.95943	3.53434	3.62556	3.71914	2.98539	3.04824	3.62426	3.67585	3.13828
9.41	3.51637	2.95374	3.52921	3.62053	3.71422	2.97973	3.04258	3.61923	3.6709	3.13273
9.42	3.51123	2.94804	3.52408	3.61551	3.70929	2.97407	3.03692	3.6142	3.66595	3.12719
9.43	3.50609	2.94235	3.51896	3.61049	3.70436	2.96842	3.03126	3.60917	3.66101	3.12165
9.44	3.50094	2.93665	3.51383	3.60547	3.69943	2.96276	3.02561	3.60414	3.65606	3.11611
9.45	3.4958	2.93096	3.5087	3.60045	3.6945	2.9571	3.01995	3.5991	3.65111	3.11057
9.46	3.49066	2.92526	3.50358	3.59543	3.68957	2.95144	3.01429	3.59407	3.64616	3.10503
9.47	3.48551	2.91957	3.49845	3.59041	3.68464	2.94578	3.00863	3.58904	3.64122	3.09948
9.48	3.48037	2.91387	3.49333	3.58539	3.67971	2.94012	3.00297	3.58401	3.63627	3.09394
9.49	3.47523	2.90818	3.4882	3.58037	3.67478	2.93447	2.99731	3.57897	3.63132	3.0884
9.5	3.47008	2.90248	3.48307	3.57534	3.66985	2.92881	2.99165	3.57394	3.62637	3.08286
9.51	3.46494	2.89679	3.47795	3.57032	3.66493	2.92315	2.98599	3.56891	3.62143	3.07732
9.52	3.4598	2.8911	3.47282	3.5653	3.66	2.91749	2.98033	3.56388	3.61648	3.07178
9.53	3.45465	2.8854	3.4677	3.56028	3.65507	2.91183	2.97468	3.55884	3.61153	3.06624
9.54	3.44951	2.87971	3.46257	3.55526	3.65014	2.90618	2.96902	3.55381	3.60658	3.06069
9.55	3.44436	2.87401	3.45744	3.55024	3.64521	2.90052	2.96336	3.54878	3.60164	3.05515
9.56	3.43922	2.86832	3.45232	3.54522	3.64028	2.89486	2.9577	3.54375	3.59669	3.04961
9.57	3.43408	2.86262	3.44719	3.5402	3.63535	2.8892	2.95204	3.53872	3.59174	3.04407
9.58	3.42893	2.85693	3.44207	3.53518	3.63042	2.88354	2.94638	3.53368	3.58679	3.03853
9.59	3.42379	2.85123	3.43694	3.53016	3.62549	2.87789	2.94072	3.52865	3.58185	3.03299
9.6	3.41865	2.84554	3.43181	3.52513	3.62056	2.87223	2.93506	3.52362	3.5769	3.02745
9.61	3.4135	2.83984	3.42669	3.52011	3.61564	2.86657	2.92941	3.51859	3.57195	3.0219
9.62	3.40836	2.83415	3.42156	3.51509	3.61071	2.86091	2.92375	3.51355	3.567	3.01636
9.63	3.40322	2.82845	3.41643	3.51007	3.60578	2.85525	2.91809	3.50852	3.56206	3.01082
9.64	3.39807	2.82276	3.41131	3.50505	3.60085	2.8496	2.91243	3.50349	3.55711	3.00528
9.65	3.39293	2.81706	3.40618	3.50003	3.59592	2.84394	2.90677	3.49846	3.55216	2.99974
9.66	3.38779	2.81137	3.40106	3.49501	3.59099	2.83828	2.90111	3.49342	3.54721	2.9942
9.67	3.38264	2.80568	3.39593	3.48999	3.58606	2.83262	2.89545	3.48839	3.54227	2.98865
9.68	3.3775	2.79998	3.3908	3.48497	3.58113	2.82696	2.88979	3.48336	3.53732	2.98311
9.69	3.37236	2.79429	3.38568	3.47994	3.5762	2.82131	2.88413	3.47833	3.53237	2.97757
9.7	3.36721	2.78859	3.38055	3.47492	3.57127	2.81565	2.87848	3.4733	3.52742	2.97203
9.71	3.36207	2.7829	3.37543	3.4699	3.56634	2.80999	2.87282	3.46826	3.52247	2.96649
9.72	3.35693	2.7772	3.3703	3.46488	3.56142	2.80433	2.86716	3.46323	3.51753	2.96095
9.73	3.35178	2.77151	3.36517	3.45986	3.55649	2.79867	2.8615	3.4582	3.51258	2.95541
9.74	3.34664	2.76581	3.36005	3.45484	3.55156	2.79302	2.85584	3.45317	3.50763	2.94986
9.75	3.3415	2.76012	3.35492	3.44982	3.54663	2.78736	2.85018	3.44813	3.50268	2.94432
9.76	3.33635	2.75442	3.3498	3.4448	3.5417	2.7817	2.84452	3.4431	3.49774	2.93878
9.77	3.33121	2.74873	3.34467	3.43978	3.53677	2.77604	2.83886	3.43807	3.49279	2.93324
9.78	3.32606	2.74303	3.33954	3.43476	3.53184	2.77038	2.83321	3.43304	3.48784	2.9277
9.79	3.32092	2.73734	3.33442	3.42973	3.52691	2.76473	2.82755	3.428	3.48289	2.92216
9.8	3.31578	2.73164	3.32929	3.42471	3.52198	2.75907	2.82189	3.42297	3.47795	2.91661
9.81	3.31063	2.72595	3.32416	3.41969	3.51705	2.75341	2.81623	3.41794	3.473	2.91107
9.82	3.30549	2.72025	3.31904	3.41467	3.51213	2.74775	2.81057	3.41291	3.46805	2.90553
9.83	3.30035	2.71456	3.31391	3.40965	3.5072	2.74209	2.80491	3.40788	3.4631	2.89999
9.84	3.2952	2.70887	3.30879	3.40463	3.50227	2.73644	2.79925	3.40284	3.45816	2.89445
9.85	3.29006	2.70317	3.30366	3.39961	3.49734	2.73078	2.79359	3.39781	3.45321	2.88891
9.86	3.28492	2.69748	3.29853	3.39459	3.49241	2.72512	2.78793	3.39278	3.44826	2.88337
9.87	3.27977	2.69178	3.29341	3.38957	3.48748	2.71946	2.78228	3.38775	3.44331	2.87782
9.88	3.27463	2.68609	3.28828	3.38454	3.48255	2.7138	2.77662	3.38271	3.43837	2.87228
9.89	3.26949	2.68039	3.28316	3.37952	3.47762	2.70815	2.77096	3.37768	3.43342	2.86674
9.9	3.26434	2.6747	3.27803	3.3745	3.47269	2.70249	2.7653	3.37265	3.42847	2.8612
9.91	3.2592	2.669	3.2729	3.36948	3.46776	2.69683	2.75964	3.36762	3.42352	2.85566
9.92	3.25406	2.66331	3.26778	3.36446	3.46284	2.69117	2.75398	3.36258	3.41858	2.85012
9.93	3.24891	2.65761	3.26265	3.35944	3.45791	2.68551	2.74832	3.35755	3.41363	2.84458
9.94	3.24377	2.65192	3.25753	3.35442	3.45298	2.67986	2.74266	3.35252	3.40868	2.83903
9.95	3.23863	2.64622	3.2524	3.3494	3.44805	2.6742	2.73701	3.34749	3.40373	2.83349
9.96	3.23348	2.64053	3.24727	3.34438	3.44312	2.66854	2.73135	3.34246	3.39879	2.82795
9.97	3.22834	2.63483	3.24215	3.33936	3.43819	2.66288	2.72569	3.33742	3.39384	2.82241
9.98	3.2232	2.62914	3.23702	3.33433	3.43326	2.65722	2.72003	3.33239	3.38889	2.81687
9.99	3.21805	2.62345	3.23189	3.32931	3.42833	2.65157	2.71437	3.32736	3.38394	2.81133
10	3.21291	2.61775	3.22677	3.32429	3.4234	2.64591	2.70871	3.32233	3.379	2.80578
10.01	3.20776	2.61206	3.22164	3.31927	3.41847	2.64025	2.70305	3.31729	3.37405	2.80024
10.02	3.20262	2.60636	3.21652	3.31425	3.41355	2.63459	2.69739	3.31226	3.3691	2.7947
10.03	3.19748	2.60067	3.21139	3.30923	3.40862	2.62893	2.69174	3.30723	3.36415	2.78916
10.04	3.19233	2.59497	3.20626	3.30421	3.40369	2.62328	2.68608	3.3022	3.35921	2.78362
10.05	3.18719	2.58928	3.20114	3.29919	3.39876	2.61762	2.68042	3.29717	3.35426	2.77808
10.06	3.18205	2.58358	3.19601	3.29417	3.39383	2.61196	2.67476	3.29213	3.34931	2.77254
10.07	3.1769	2.57789	3.19089	3.28914	3.3889	2.6063	2.6691	3.2871	3.34436	2.76699
10.08	3.17176	2.57219	3.18576	3.28412	3.38397	2.60064	2.66344	3.28207	3.33941	2.76145
10.09	3.16662	2.5665	3.18063	3.2791	3.37904	2.59498	2.65778	3.27704	3.33447	2.75591
10.1	3.16147	2.5608	3.17551	3.27408	3.37411	2.58933	2.65212	3.272	3.32952	2.75037
10.11	3.15633	2.55511	3.17038	3.26906	3.36918	2.58367	2.64646	3.26697	3.32457	2.74483
10.12	3.15119	2.54941	3.16526	3.26404	3.36425	2.57801	2.64081	3.26194	3.31962	2.73929
10.13	3.14604	2.54372	3.16013	3.25902	3.35933	2.57235	2.63515	3.25691	3.31468	2.73375
10.14	3.1409	2.53802	3.155	3.254	3.3544	2.56669	2.62949	3.25187	3.30973	2.7282
10.15	3.13576	2.53233	3.14988	3.24898	3.34947	2.56104	2.62383	3.24684	3.30478	2.72266
10.16	3.13061	2.52664	3.14475	3.24396	3.34454	2.55538	2.61817	3.24181	3.29983	2.71712
10.17	3.12547	2.52094	3.13962	3.23893	3.33961	2.54972	2.61251	3.23678	3.29489	2.71158
10.18	3.12033	2.51525	3.1345	3.23391	3.33468	2.54406	2.60685	3.23175	3.28994	2.70604
10.19	3.11518	2.50955	3.12937	3.22889	3.32975	2.5384	2.60119	3.22671	3.28499	2.7005
10.2	3.11004	2.50386	3.12425	3.22387	3.32482	2.53275	2.59554	3.22168	3.28004	2.69495
10.21	3.1049	2.49816	3.11912	3.21885	3.31989	2.52709	2.58988	3.21665	3.2751	2.68941
10.22	3.09975	2.49247	3.11399	3.21383	3.31496	2.52143	2.58422	3.21162	3.27015	2.68387
10.23	3.09461	2.48677	3.10887	3.20881	3.31004	2.51577	2.57856	3.20658	3.2652	2.67833
10.24	3.08946	2.48108	3.10374	3.20379	3.30511	2.51011	2.5729	3.20155	3.26025	2.67279
10.25	3.08432	2.47538	3.09862	3.19877	3.30018	2.50446	2.56724	3.19652	3.25531	2.66725
10.26	3.07918	2.46969	3.09349	3.19374	3.29525	2.4988	2.56158	3.19149	3.25036	2.66171
10.27	3.07403	2.46399	3.08836	3.18872	3.29032	2.49314	2.55592	3.18645	3.24541	2.65616
10.28	3.06889	2.4583	3.08324	3.1837	3.28539	2.48748	2.55026	3.18142	3.24046	2.65062
10.29	3.06375	2.4526	3.07811	3.17868	3.28046	2.48182	2.54461	3.17639	3.23552	2.64508
10.3	3.0586	2.44691	3.07299	3.17366	3.27553	2.47617	2.53895	3.17136	3.23057	2.63954
10.31	3.05346	2.44122	3.06786	3.16864	3.2706	2.47051	2.53329	3.16633	3.22562	2.634
10.32	3.04832	2.43552	3.06273	3.16362	3.26567	2.46485	2.52763	3.16129	3.22067	2.62846
10.33	3.04317	2.42983	3.05761	3.1586	3.26075	2.45919	2.52197	3.15626	3.21573	2.62291
10.34	3.03803	2.42413	3.05248	3.15358	3.25582	2.45353	2.51631	3.15123	3.21078	2.61737
10.35	3.03289	2.41844	3.04735	3.14856	3.25089	2.44788	2.51065	3.1462	3.20583	2.61183
10.36	3.02774	2.41274	3.04223	3.14353	3.24596	2.44222	2.50499	3.14116	3.20088	2.60629
10.37	3.0226	2.40705	3.0371	3.13851	3.24103	2.43656	2.49934	3.13613	3.19594	2.60075
10.38	3.01746	2.40135	3.03198	3.13349	3.2361	2.4309	2.49368	3.1311	3.19099	2.59521
10.39	3.01231	2.39566	3.02685	3.12847	3.23117	2.42524	2.48802	3.12607	3.18604	2.58967
10.4	3.00717	2.38996	3.02172	3.12345	3.22624	2.41959	2.48236	3.12103	3.18109	2.58412
10.41	3.00203	2.38427	3.0166	3.11843	3.22131	2.41393	2.4767	3.116	3.17615	2.57858
10.42	2.99688	2.37857	3.01147	3.11341	3.21638	2.40827	2.47104	3.11097	3.1712	2.57304
10.43	2.99174	2.37288	3.00635	3.10839	3.21146	2.40261	2.46538	3.10594	3.16625	2.5675
10.44	2.9866	2.36718	3.00122	3.10337	3.20653	2.39695	2.45972	3.10091	3.1613	2.56196
10.45	2.98145	2.36149	2.99609	3.09834	3.2016	2.3913	2.45406	3.09587	3.15635	2.55642
10.46	2.97631	2.35579	2.99097	3.09332	3.19667	2.38564	2.44841	3.09084	3.15141	2.55088
10.47	2.97116	2.3501	2.98584	3.0883	3.19174	2.37998	2.44275	3.08581	3.14646	2.54533
10.48	2.96602	2.34441	2.98072	3.08328	3.18681	2.37432	2.43709	3.08078	3.14151	2.53979
10.49	2.96088	2.33871	2.97559	3.07826	3.18188	2.36866	2.43143	3.07574	3.13656	2.53425
10.5	2.95573	2.33302	2.97046	3.07324	3.17695	2.36301	2.42577	3.07071	3.13162	2.52871
10.51	2.95059	2.32732	2.96534	3.06822	3.17202	2.35735	2.42011	3.06568	3.12667	2.52317
10.52	2.94545	2.32163	2.96021	3.0632	3.16709	2.35169	2.41445	3.06065	3.12172	2.51763
10.53	2.9403	2.31593	2.95508	3.05818	3.16216	2.34603	2.40879	3.05561	3.11677	2.51208
10.54	2.93516	2.31024	2.94996	3.05316	3.15724	2.34037	2.40314	3.05058	3.11183	2.50654
10.55	2.93002	2.30454	2.94483	3.04813	3.15231	2.33472	2.39748	3.04555	3.10688	2.501
10.56	2.92487	2.29885	2.93971	3.04311	3.14738	2.32906	2.39182	3.04052	3.10193	2.49546
10.57	2.91973	2.29315	2.93458	3.03809	3.14245	2.3234	2.38616	3.03549	3.09698	2.48992
10.58	2.91459	2.28746	2.92945	3.03307	3.13752	2.31774	2.3805	3.03045	3.09204	2.48438
10.59	2.90944	2.28176	2.92433	3.02805	3.13259	2.31208	2.37484	3.02542	3.08709	2.47884
10.6	2.9043	2.27607	2.9192	3.02303	3.12766	2.30643	2.36918	3.02039	3.08214	2.47329
10.61	2.89916	2.27037	2.91408	3.01801	3.12273	2.30077	2.36352	3.01536	3.07719	2.46775
10.62	2.89401	2.26468	2.90895	3.01299	3.1178	2.29511	2.35787	3.01032	3.07225	2.46221
10.63	2.88887	2.25899	2.90382	3.00797	3.11287	2.28945	2.35221	3.00529	3.0673	2.45667
10.64	2.88373	2.25329	2.8987	3.00294	3.10795	2.28379	2.34655	3.00026	3.06235	2.45113
10.65	2.87858	2.2476	2.89357	2.99792	3.10302	2.27814	2.34089	2.99523	3.0574	2.44559
10.66	2.87344	2.2419	2.88845	2.9929	3.09809	2.27248	2.33523	2.99019	3.05246	2.44005
10.67	2.8683	2.23621	2.88332	2.98788	3.09316	2.26682	2.32957	2.98516	3.04751	2.4345
10.68	2.86315	2.23051	2.87819	2.98286	3.08823	2.26116	2.32391	2.98013	3.04256	2.42896
10.69	2.85801	2.22482	2.87307	2.97784	3.0833	2.2555	2.31825	2.9751	3.03761	2.42342
10.7	2.85286	2.21912	2.86794	2.97282	3.07837	2.24984	2.31259	2.97007	3.03267	2.41788
10.71	2.84772	2.21343	2.86281	2.9678	3.07344	2.24419	2.30694	2.96503	3.02772	2.41234
10.72	2.84258	2.20773	2.85769	2.96278	3.06851	2.23853	2.30128	2.96	3.02277	2.4068
10.73	2.83743	2.20204	2.85256	2.95776	3.06358	2.23287	2.29562	2.95497	3.01782	2.40125
10.74	2.83229	2.19634	2.84744	2.95273	3.05866	2.22721	2.28996	2.94994	3.01288	2.39571
10.75	2.82715	2.19065	2.84231	2.94771	3.05373	2.22155	2.2843	2.9449	3.00793	2.39017
10.76	2.822	2.18495	2.83718	2.94269	3.0488	2.2159	2.27864	2.93987	3.00298	2.38463
10.77	2.81686	2.17926	2.83206	2.93767	3.04387	2.21024	2.27298	2.93484	2.99803	2.37909
10.78	2.81172	2.17356	2.82693	2.93265	3.03894	2.20458	2.26732	2.92981	2.99308	2.37355
10.79	2.80657	2.16787	2.82181	2.92763	3.03401	2.19892	2.26167	2.92477	2.98814	2.36801
10.8	2.80143	2.16218	2.81668	2.92261	3.02908	2.19326	2.25601	2.91974	2.98319	2.36246
10.81	2.79629	2.15648	2.81155	2.91759	3.02415	2.18761	2.25035	2.91471	2.97824	2.35692
10.82	2.79114	2.15079	2.80643	2.91257	3.01922	2.18195	2.24469	2.90968	2.97329	2.35138
10.83	2.786	2.14509	2.8013	2.90754	3.01429	2.17629	2.23903	2.90465	2.96835	2.34584
10.84	2.78086	2.1394	2.79618	2.90252	3.00937	2.17063	2.23337	2.89961	2.9634	2.3403
10.85	2.77571	2.1337	2.79105	2.8975	3.00444	2.16497	2.22771	2.89458	2.95845	2.33476
10.86	2.77057	2.12801	2.78592	2.89248	2.99951	2.15932	2.22205	2.88955	2.9535	2.32921
10.87	2.76543	2.12231	2.7808	2.88746	2.99458	2.15366	2.21639	2.88452	2.94856	2.32367
10.88	2.76028	2.11662	2.77567	2.88244	2.98965	2.148	2.21074	2.87948	2.94361	2.31813
10.89	2.75514	2.11092	2.77054	2.87742	2.98472	2.14234	2.20508	2.87445	2.93866	2.31259
10.9	2.75	2.10523	2.76542	2.8724	2.97979	2.13668	2.19942	2.86942	2.93371	2.30705
10.91	2.74485	2.09953	2.76029	2.86738	2.97486	2.13103	2.19376	2.86439	2.92877	2.30151
10.92	2.73971	2.09384	2.75517	2.86236	2.96993	2.12537	2.1881	2.85935	2.92382	2.29597
10.93	2.73456	2.08814	2.75004	2.85733	2.965	2.11971	2.18244	2.85432	2.91887	2.29042
10.94	2.72942	2.08245	2.74491	2.85231	2.96007	2.11405	2.17678	2.84929	2.91392	2.28488
10.95	2.72428	2.07676	2.73979	2.84729	2.95515	2.10839	2.17112	2.84426	2.90898	2.27934
10.96	2.71913	2.07106	2.73466	2.84227	2.95022	2.10274	2.16547	2.83923	2.90403	2.2738
10.97	2.71399	2.06537	2.72954	2.83725	2.94529	2.09708	2.15981	2.83419	2.89908	2.26826
10.98	2.70885	2.05967	2.72441	2.83223	2.94036	2.09142	2.15415	2.82916	2.89413	2.26272
10.99	2.7037	2.05398	2.71928	2.82721	2.93543	2.08576	2.14849	2.82413	2.88919	2.25718
11	2.69856	2.04828	2.71416	2.82219	2.9305	2.0801	2.14283	2.8191	2.88424	2.25163
11.01	2.69342	2.04259	2.70903	2.81717	2.92557	2.07445	2.13717	2.81406	2.87929	2.24609
11.02	2.68827	2.03689	2.70391	2.81214	2.92064	2.06879	2.13151	2.80903	2.87434	2.24055
11.03	2.68313	2.0312	2.69878	2.80712	2.91571	2.06313	2.12585	2.804	2.8694	2.23501
11.04	2.67799	2.0255	2.69365	2.8021	2.91078	2.05747	2.12019	2.79897	2.86445	2.22947
11.05	2.67284	2.01981	2.68853	2.79708	2.90586	2.05181	2.11454	2.79393	2.8595	2.22393
11.06	2.6677	2.01411	2.6834	2.79206	2.90093	2.04616	2.10888	2.7889	2.85455	2.21838
11.07	2.66256	2.00842	2.67827	2.78704	2.896	2.0405	2.10322	2.78387	2.84961	2.21284
11.08	2.65741	2.00272	2.67315	2.78202	2.89107	2.03484	2.09756	2.77884	2.84466	2.2073
11.09	2.65227	1.99703	2.66802	2.777	2.88614	2.02918	2.0919	2.77381	2.83971	2.20176
11.1	2.64713	1.99133	2.6629	2.77198	2.88121	2.02352	2.08624	2.76877	2.83476	2.19622
11.11	2.64198	1.98564	2.65777	2.76696	2.87628	2.01787	2.08058	2.76374	2.82982	2.19068
11.12	2.63684	1.97995	2.65264	2.76193	2.87135	2.01221	2.07492	2.75871	2.82487	2.18514
11.13	2.6317	1.97425	2.64752	2.75691	2.86642	2.00655	2.06927	2.75368	2.81992	2.17959
11.14	2.62655	1.96856	2.64239	2.75189	2.86149	2.00089	2.06361	2.74864	2.81497	2.17405
11.15	2.62141	1.96286	2.63727	2.74687	2.85657	1.99523	2.05795	2.74361	2.81002	2.16851
11.16	2.61626	1.95717	2.63214	2.74185	2.85164	1.98958	2.05229	2.73858	2.80508	2.16297
11.17	2.61112	1.95147	2.62701	2.73683	2.84671	1.98392	2.04663	2.73355	2.80013	2.15743
11.18	2.60598	1.94578	2.62189	2.73181	2.84178	1.97826	2.04097	2.72852	2.79518	2.15189
11.19	2.60083	1.94008	2.61676	2.72679	2.83685	1.9726	2.03531	2.72348	2.79023	2.14634
11.2	2.59569	1.93439	2.61164	2.72177	2.83192	1.96694	2.02965	2.71845	2.78529	2.1408
11.21	2.59055	1.92869	2.60651	2.71674	2.82699	1.96129	2.024	2.71342	2.78034	2.13526
11.22	2.5854	1.923	2.60138	2.71172	2.82206	1.95563	2.01834	2.70839	2.77539	2.12972
11.23	2.58026	1.9173	2.59626	2.7067	2.81713	1.94997	2.01268	2.70335	2.77044	2.12418
11.24	2.57512	1.91161	2.59113	2.70168	2.8122	1.94431	2.00702	2.69832	2.7655	2.11864
11.25	2.56997	1.90591	2.58601	2.69666	2.80728	1.93865	2.00136	2.69329	2.76055	2.1131
11.26	2.56483	1.90022	2.58088	2.69164	2.80235	1.933	1.9957	2.68826	2.7556	2.10755
11.27	2.55969	1.89453	2.57575	2.68662	2.79742	1.92734	1.99004	2.68322	2.75065	2.10201
11.28	2.55454	1.88883	2.57063	2.6816	2.79249	1.92168	1.98438	2.67819	2.74571	2.09647
11.29	2.5494	1.88314	2.5655	2.67658	2.78756	1.91602	1.97872	2.67316	2.74076	2.09093
11.3	2.54426	1.87744	2.56037	2.67156	2.78263	1.91036	1.97307	2.66813	2.73581	2.08539
11.31	2.53911	1.87175	2.55525	2.66653	2.7777	1.90471	1.96741	2.6631	2.73086	2.07985
11.32	2.53397	1.86605	2.55012	2.66151	2.77277	1.89905	1.96175	2.65806	2.72592	2.07431
11.33	2.52883	1.86036	2.545	2.65649	2.76784	1.89339	1.95609	2.65303	2.72097	2.06876
11.34	2.52368	1.85466	2.53987	2.65147	2.76291	1.88773	1.95043	2.648	2.71602	2.06322
11.35	2.51854	1.84897	2.53474	2.64645	2.75798	1.88207	1.94477	2.64297	2.71107	2.05768
11.36	2.51339	1.84327	2.52962	2.64143	2.75306	1.87641	1.93911	2.63793	2.70613	2.05214
11.37	2.50825	1.83758	2.52449	2.63641	2.74813	1.87076	1.93345	2.6329	2.70118	2.0466
11.38	2.50311	1.83188	2.51937	2.63139	2.7432	1.8651	1.9278	2.62787	2.69623	2.04106
11.39	2.49796	1.82619	2.51424	2.62637	2.73827	1.85944	1.92214	2.62284	2.69128	2.03551
11.4	2.49282	1.82049	2.50911	2.62134	2.73334	1.85378	1.91648	2.6178	2.68634	2.02997
11.41	2.48768	1.8148	2.50399	2.61632	2.72841	1.84812	1.91082	2.61277	2.68139	2.02443
11.42	2.48253	1.8091	2.49886	2.6113	2.72348	1.84247	1.90516	2.60774	2.67644	2.01889
11.43	2.47739	1.80341	2.49374	2.60628	2.71855	1.83681	1.8995	2.60271	2.67149	2.01335
11.44	2.47225	1.79772	2.48861	2.60126	2.71362	1.83115	1.89384	2.59768	2.66655	2.00781
11.45	2.4671	1.79202	2.48348	2.59624	2.70869	1.82549	1.88818	2.59264	2.6616	2.00227
11.46	2.46196	1.78633	2.47836	2.59122	2.70377	1.81983	1.88252	2.58761	2.65665	1.99672
11.47	2.45682	1.78063	2.47323	2.5862	2.69884	1.81418	1.87687	2.58258	2.6517	1.99118
11.48	2.45167	1.77494	2.4681	2.58118	2.69391	1.80852	1.87121	2.57755	2.64676	1.98564
11.49	2.44653	1.76924	2.46298	2.57616	2.68898	1.80286	1.86555	2.57251	2.64181	1.9801
11.5	2.44139	1.76355	2.45785	2.57113	2.68405	1.7972	1.85989	2.56748	2.63686	1.97456
11.51	2.43624	1.75785	2.45273	2.56611	2.67912	1.79154	1.85423	2.56245	2.63191	1.96902
11.52	2.4311	1.75216	2.4476	2.56109	2.67419	1.78589	1.84857	2.55742	2.62696	1.96348
11.53	2.42596	1.74646	2.44247	2.55607	2.66926	1.78023	1.84291	2.55238	2.62202	1.95793
11.54	2.42081	1.74077	2.43735	2.55105	2.66433	1.77457	1.83725	2.54735	2.61707	1.95239
11.55	2.41567	1.73507	2.43222	2.54603	2.6594	1.76891	1.8316	2.54232	2.61212	1.94685
11.56	2.41053	1.72938	2.4271	2.54101	2.65448	1.76325	1.82594	2.53729	2.60717	1.94131
11.57	2.40538	1.72368	2.42197	2.53599	2.64955	1.7576	1.82028	2.53226	2.60223	1.93577
11.58	2.40024	1.71799	2.41684	2.53097	2.64462	1.75194	1.81462	2.52722	2.59728	1.93023
11.59	2.39509	1.7123	2.41172	2.52594	2.63969	1.74628	1.80896	2.52219	2.59233	1.92468
11.6	2.38995	1.7066	2.40659	2.52092	2.63476	1.74062	1.8033	2.51716	2.58738	1.91914
11.61	2.38481	1.70091	2.40147	2.5159	2.62983	1.73496	1.79764	2.51213	2.58244	1.9136
11.62	2.37966	1.69521	2.39634	2.51088	2.6249	1.72931	1.79198	2.50709	2.57749	1.90806
11.63	2.37452	1.68952	2.39121	2.50586	2.61997	1.72365	1.78632	2.50206	2.57254	1.90252
11.64	2.36938	1.68382	2.38609	2.50084	2.61504	1.71799	1.78067	2.49703	2.56759	1.89698
11.65	2.36423	1.67813	2.38096	2.49582	2.61011	1.71233	1.77501	2.492	2.56265	1.89144
11.66	2.35909	1.67243	2.37583	2.4908	2.60519	1.70667	1.76935	2.48696	2.5577	1.88589
11.67	2.35395	1.66674	2.37071	2.48578	2.60026	1.70102	1.76369	2.48193	2.55275	1.88035
11.68	2.3488	1.66104	2.36558	2.48076	2.59533	1.69536	1.75803	2.4769	2.5478	1.87481
11.69	2.34366	1.65535	2.36046	2.47573	2.5904	1.6897	1.75237	2.47187	2.54286	1.86927
11.7	2.33852	1.64965	2.35533	2.47071	2.58547	1.68404	1.74671	2.46684	2.53791	1.86373
11.71	2.33337	1.64396	2.3502	2.46569	2.58054	1.67838	1.74105	2.4618	2.53296	1.85819
11.72	2.32823	1.63826	2.34508	2.46067	2.57561	1.67273	1.7354	2.45677	2.52801	1.85264
11.73	2.32309	1.63257	2.33995	2.45565	2.57068	1.66707	1.72974	2.45174	2.52307	1.8471
11.74	2.31794	1.62687	2.33483	2.45063	2.56575	1.66141	1.72408	2.44671	2.51812	1.84156
11.75	2.3128	1.62118	2.3297	2.44561	2.56082	1.65575	1.71842	2.44167	2.51317	1.83602
11.76	2.30766	1.61549	2.32457	2.44059	2.55589	1.65009	1.71276	2.43664	2.50822	1.83048
11.77	2.30251	1.60979	2.31945	2.43557	2.55097	1.64444	1.7071	2.43161	2.50328	1.82494
11.78	2.29737	1.6041	2.31432	2.43054	2.54604	1.63878	1.70144	2.42658	2.49833	1.8194
11.79	2.29223	1.5984	2.3092	2.42552	2.54111	1.63312	1.69578	2.42154	2.49338	1.81385
11.8	2.28708	1.59271	2.30407	2.4205	2.53618	1.62746	1.69013	2.41651	2.48843	1.80831
11.81	2.28194	1.58701	2.29894	2.41548	2.53125	1.6218	1.68447	2.41148	2.48349	1.80277
11.82	2.27679	1.58132	2.29382	2.41046	2.52632	1.61615	1.67881	2.40645	2.47854	1.79723
11.83	2.27165	1.57562	2.28869	2.40544	2.52139	1.61049	1.67315	2.40142	2.47359	1.79169
11.84	2.26651	1.56993	2.28356	2.40042	2.51646	1.60483	1.66749	2.39638	2.46864	1.78615
11.85	2.26136	1.56423	2.27844	2.3954	2.51153	1.59917	1.66183	2.39135	2.46369	1.78061
11.86	2.25622	1.55854	2.27331	2.39038	2.5066	1.59351	1.65617	2.38632	2.45875	1.77506
11.87	2.25108	1.55284	2.26819	2.38536	2.50168	1.58786	1.65051	2.38129	2.4538	1.76952
11.88	2.24593	1.54715	2.26306	2.38033	2.49675	1.5822	1.64485	2.37625	2.44885	1.76398
11.89	2.24079	1.54145	2.25793	2.37531	2.49182	1.57654	1.6392	2.37122	2.4439	1.75844
11.9	2.23565	1.53576	2.25281	2.37029	2.48689	1.57088	1.63354	2.36619	2.43896	1.7529
11.91	2.2305	1.53007	2.24768	2.36527	2.48196	1.56522	1.62788	2.36116	2.43401	1.74736
11.92	2.22536	1.52437	2.24256	2.36025	2.47703	1.55957	1.62222	2.35612	2.42906	1.74181
11.93	2.22022	1.51868	2.23743	2.35523	2.4721	1.55391	1.61656	2.35109	2.42411	1.73627
11.94	2.21507	1.51298	2.2323	2.35021	2.46717	1.54825	1.6109	2.34606	2.41917	1.73073
11.95	2.20993	1.50729	2.22718	2.34519	2.46224	1.54259	1.60524	2.34103	2.41422	1.72519
11.96	2.20479	1.50159	2.22205	2.34017	2.45731	1.53693	1.59958	2.336	2.40927	1.71965
11.97	2.19964	1.4959	2.21693	2.33514	2.45239	1.53127	1.59393	2.33096	2.40432	1.71411
11.98	2.1945	1.4902	2.2118	2.33012	2.44746	1.52562	1.58827	2.32593	2.39938	1.70857
11.99	2.18936	1.48451	2.20667	2.3251	2.44253	1.51996	1.58261	2.3209	2.39443	1.70302
12	2.18421	1.47881	2.20155	2.32008	2.4376	1.5143	1.57695	2.31587	2.38948	1.69748
12.01	2.17907	1.47312	2.19642	2.31506	2.43267	1.50864	1.57129	2.31083	2.38453	1.69194
12.02	2.17393	1.46742	2.19129	2.31004	2.42774	1.50298	1.56563	2.3058	2.37959	1.6864
12.03	2.16878	1.46173	2.18617	2.30502	2.42281	1.49733	1.55997	2.30077	2.37464	1.68086
12.04	2.16364	1.45603	2.18104	2.3	2.41788	1.49167	1.55431	2.29574	2.36969	1.67532
12.05	2.15849	1.45034	2.17592	2.29498	2.41295	1.48601	1.54865	2.2907	2.36474	1.66978
12.06	2.15335	1.44464	2.17079	2.28996	2.40802	1.48035	1.543	2.28567	2.3598	1.66423
12.07	2.14821	1.43895	2.16566	2.28493	2.4031	1.47469	1.53734	2.28064	2.35485	1.65869
12.08	2.14306	1.43326	2.16054	2.27991	2.39817	1.46904	1.53168	2.27561	2.3499	1.65315
12.09	2.13792	1.42756	2.15541	2.27489	2.39324	1.46338	1.52602	2.27058	2.34495	1.64761
12.1	2.13278	1.42187	2.15029	2.26987	2.38831	1.45772	1.52036	2.26554	2.34001	1.64207
12.11	2.12763	1.41617	2.14516	2.26485	2.38338	1.45206	1.5147	2.26051	2.33506	1.63653
12.12	2.12249	1.41048	2.14003	2.25983	2.37845	1.4464	1.50904	2.25548	2.33011	1.63098
12.13	2.11735	1.40478	2.13491	2.25481	2.37352	1.44075	1.50338	2.25045	2.32516	1.62544
12.14	2.1122	1.39909	2.12978	2.24979	2.36859	1.43509	1.49773	2.24541	2.32022	1.6199
12.15	2.10706	1.39339	2.12466	2.24477	2.36366	1.42943	1.49207	2.24038	2.31527	1.61436
12.16	2.10192	1.3877	2.11953	2.23974	2.35873	1.42377	1.48641	2.23535	2.31032	1.60882
12.17	2.09677	1.382	2.1144	2.23472	2.3538	1.41811	1.48075	2.23032	2.30537	1.60328
12.18	2.09163	1.37631	2.10928	2.2297	2.34888	1.41246	1.47509	2.22529	2.30043	1.59774
12.19	2.08649	1.37061	2.10415	2.22468	2.34395	1.4068	1.46943	2.22025	2.29548	1.59219
12.2	2.08134	1.36492	2.09902	2.21966	2.33902	1.40114	1.46377	2.21522	2.29053	1.58665
12.21	2.0762	1.35922	2.0939	2.21464	2.33409	1.39548	1.45811	2.21019	2.28558	1.58111
12.22	2.07106	1.35353	2.08877	2.20962	2.32916	1.38982	1.45245	2.20516	2.28063	1.57557
12.23	2.06591	1.34784	2.08365	2.2046	2.32423	1.38417	1.4468	2.20012	2.27569	1.57003
12.24	2.06077	1.34214	2.07852	2.19958	2.3193	1.37851	1.44114	2.19509	2.27074	1.56449
12.25	2.05563	1.33645	2.07339	2.19456	2.31437	1.37285	1.43548	2.19006	2.26579	1.55894
12.26	2.05048	1.33075	2.06827	2.18953	2.30944	1.36719	1.42982	2.18503	2.26084	1.5534
12.27	2.04534	1.32506	2.06314	2.18451	2.30451	1.36153	1.42416	2.17999	2.2559	1.54786
12.28	2.04019	1.31936	2.05802	2.17949	2.29959	1.35588	1.4185	2.17496	2.25095	1.54232
12.29	2.03505	1.31367	2.05289	2.17447	2.29466	1.35022	1.41284	2.16993	2.246	1.53678
12.3	2.02991	1.30797	2.04776	2.16945	2.28973	1.34456	1.40718	2.1649	2.24105	1.53124
12.31	2.02476	1.30228	2.04264	2.16443	2.2848	1.3389	1.40153	2.15987	2.23611	1.5257
12.32	2.01962	1.29658	2.03751	2.15941	2.27987	1.33324	1.39587	2.15483	2.23116	1.52015
12.33	2.01448	1.29089	2.03239	2.15439	2.27494	1.32759	1.39021	2.1498	2.22621	1.51461
12.34	2.00933	1.28519	2.02726	2.14937	2.27001	1.32193	1.38455	2.14477	2.22126	1.50907
12.35	2.00419	1.2795	2.02213	2.14434	2.26508	1.31627	1.37889	2.13974	2.21632	1.50353
12.36	1.99905	1.2738	2.01701	2.13932	2.26015	1.31061	1.37323	2.1347	2.21137	1.49799
12.37	1.9939	1.26811	2.01188	2.1343	2.25522	1.30495	1.36757	2.12967	2.20642	1.49245
12.38	1.98876	1.26241	2.00675	2.12928	2.2503	1.2993	1.36191	2.12464	2.20147	1.48691
12.39	1.98362	1.25672	2.00163	2.12426	2.24537	1.29364	1.35626	2.11961	2.19653	1.48136
12.4	1.97847	1.25103	1.9965	2.11924	2.24044	1.28798	1.3506	2.11457	2.19158	1.47582
12.41	1.97333	1.24533	1.99138	2.11422	2.23551	1.28232	1.34494	2.10954	2.18663	1.47028
12.42	1.96819	1.23964	1.98625	2.1092	2.23058	1.27666	1.33928	2.10451	2.18168	1.46474
12.43	1.96304	1.23394	1.98112	2.10418	2.22565	1.27101	1.33362	2.09948	2.17674	1.4592
12.44	1.9579	1.22825	1.976	2.09916	2.22072	1.26535	1.32796	2.09445	2.17179	1.45366
12.45	1.95276	1.22255	1.97087	2.09413	2.21579	1.25969	1.3223	2.08941	2.16684	1.44811
12.46	1.94761	1.21686	1.96575	2.08911	2.21086	1.25403	1.31664	2.08438	2.16189	1.44257
12.47	1.94247	1.21116	1.96062	2.08409	2.20593	1.24837	1.31098	2.07935	2.15695	1.43703
12.48	1.93733	1.20547	1.95549	2.07907	2.201	1.24272	1.30533	2.07432	2.152	1.43149
12.49	1.93218	1.19977	1.95037	2.07405	2.19608	1.23706	1.29967	2.06928	2.14705	1.42595
12.5	1.92704	1.19408	1.94524	2.06903	2.19115	1.2314	1.29401	2.06425	2.1421	1.42041
12.51	1.92189	1.18838	1.94012	2.06401	2.18622	1.22574	1.28835	2.05922	2.13716	1.41487
12.52	1.91675	1.18269	1.93499	2.05899	2.18129	1.22008	1.28269	2.05419	2.13221	1.40932
12.53	1.91161	1.17699	1.92986	2.05397	2.17636	1.21443	1.27703	2.04915	2.12726	1.40378
12.54	1.90646	1.1713	1.92474	2.04894	2.17143	1.20877	1.27137	2.04412	2.12231	1.39824
12.55	1.90132	1.16561	1.91961	2.04392	2.1665	1.20311	1.26571	2.03909	2.11737	1.3927
12.56	1.89618	1.15991	1.91448	2.0389	2.16157	1.19745	1.26006	2.03406	2.11242	1.38716
12.57	1.89103	1.15422	1.90936	2.03388	2.15664	1.19179	1.2544	2.02903	2.10747	1.38162
12.58	1.88589	1.14852	1.90423	2.02886	2.15171	1.18613	1.24874	2.02399	2.10252	1.37607
12.59	1.88075	1.14283	1.89911	2.02384	2.14679	1.18048	1.24308	2.01896	2.09757	1.37053
12.6	1.8756	1.13713	1.89398	2.01882	2.14186	1.17482	1.23742	2.01393	2.09263	1.36499
12.61	1.87046	1.13144	1.88885	2.0138	2.13693	1.16916	1.23176	2.0089	2.08768	1.35945
12.62	1.86532	1.12574	1.88373	2.00878	2.132	1.1635	1.2261	2.00386	2.08273	1.35391
12.63	1.86017	1.12005	1.8786	2.00376	2.12707	1.15784	1.22044	1.99883	2.07778	1.34837
12.64	1.85503	1.11435	1.87348	1.99873	2.12214	1.15219	1.21478	1.9938	2.07284	1.34283
12.65	1.84989	1.10866	1.86835	1.99371	2.11721	1.14653	1.20913	1.98877	2.06789	1.33728
12.66	1.84474	1.10296	1.86322	1.98869	2.11228	1.14087	1.20347	1.98373	2.06294	1.33174
12.67	1.8396	1.09727	1.8581	1.98367	2.10735	1.13521	1.19781	1.9787	2.05799	1.3262
12.68	1.83446	1.09157	1.85297	1.97865	2.10242	1.12955	1.19215	1.97367	2.05305	1.32066
12.69	1.82931	1.08588	1.84785	1.97363	2.0975	1.1239	1.18649	1.96864	2.0481	1.31512
12.7	1.82417	1.08019	1.84272	1.96861	2.09257	1.11824	1.18083	1.96361	2.04315	1.30958
12.71	1.81903	1.07449	1.83759	1.96359	2.08764	1.11258	1.17517	1.95857	2.0382	1.30404
12.72	1.81388	1.0688	1.83247	1.95857	2.08271	1.10692	1.16951	1.95354	2.03326	1.29849
12.73	1.80874	1.0631	1.82734	1.95354	2.07778	1.10126	1.16386	1.94851	2.02831	1.29295
12.74	1.80359	1.05741	1.82221	1.94852	2.07285	1.09561	1.1582	1.94348	2.02336	1.28741
12.75	1.79845	1.05171	1.81709	1.9435	2.06792	1.08995	1.15254	1.93844	2.01841	1.28187
12.76	1.79331	1.04602	1.81196	1.93848	2.06299	1.08429	1.14688	1.93341	2.01347	1.27633
12.77	1.78816	1.04032	1.80684	1.93346	2.05806	1.07863	1.14122	1.92838	2.00852	1.27079
12.78	1.78302	1.03463	1.80171	1.92844	2.05313	1.07297	1.13556	1.92335	2.00357	1.26524
12.79	1.77788	1.02893	1.79658	1.92342	2.04821	1.06732	1.1299	1.91831	1.99862	1.2597
12.8	1.77273	1.02324	1.79146	1.9184	2.04328	1.06166	1.12424	1.91328	1.99368	1.25416
12.81	1.76759	1.01754	1.78633	1.91338	2.03835	1.056	1.11858	1.90825	1.98873	1.24862
12.82	1.76245	1.01185	1.78121	1.90836	2.03342	1.05034	1.11293	1.90322	1.98378	1.24308
12.83	1.7573	1.00615	1.77608	1.90333	2.02849	1.04468	1.10727	1.89819	1.97883	1.23754
12.84	1.75216	1.00046	1.77095	1.89831	2.02356	1.03903	1.10161	1.89315	1.97389	1.232
12.85	1.74702	0.994765	1.76583	1.89329	2.01863	1.03337	1.09595	1.88812	1.96894	1.22645
12.86	1.74187	0.98907	1.7607	1.88827	2.0137	1.02771	1.09029	1.88309	1.96399	1.22091
12.87	1.73673	0.983375	1.75558	1.88325	2.00877	1.02205	1.08463	1.87806	1.95904	1.21537
12.88	1.73159	0.977681	1.75045	1.87823	2.00384	1.01639	1.07897	1.87302	1.9541	1.20983
12.89	1.72644	0.971986	1.74532	1.87321	1.99891	1.01074	1.07331	1.86799	1.94915	1.20429
12.9	1.7213	0.966291	1.7402	1.86819	1.99399	1.00508	1.06766	1.86296	1.9442	1.19875
12.91	1.71616	0.960597	1.73507	1.86317	1.98906	0.99942	1.062	1.85793	1.93925	1.19321
12.92	1.71101	0.954902	1.72994	1.85814	1.98413	0.993762	1.05634	1.85289	1.93431	1.18766
12.93	1.70587	0.949207	1.72482	1.85312	1.9792	0.988104	1.05068	1.84786	1.92936	1.18212
12.94	1.70073	0.943513	1.71969	1.8481	1.97427	0.982446	1.04502	1.84283	1.92441	1.17658
12.95	1.69558	0.937818	1.71457	1.84308	1.96934	0.976788	1.03936	1.8378	1.91946	1.17104
12.96	1.69044	0.932123	1.70944	1.83806	1.96441	0.97113	1.0337	1.83277	1.91451	1.1655
12.97	1.68529	0.926428	1.70431	1.83304	1.95948	0.965472	1.02804	1.82773	1.90957	1.15996
12.98	1.68015	0.920734	1.69919	1.82802	1.95455	0.959814	1.02239	1.8227	1.90462	1.15441
12.99	1.67501	0.915039	1.69406	1.823	1.94962	0.954156	1.01673	1.81767	1.89967	1.14887
13	1.66986	0.909344	1.68894	1.81798	1.9447	0.948498	1.01107	1.81264	1.89472	1.14333
13.01	1.66472	0.90365	1.68381	1.81296	1.93977	0.94284	1.00541	1.8076	1.88978	1.13779
13.02	1.65958	0.897955	1.67868	1.80793	1.93484	0.937182	0.99975	1.80257	1.88483	1.13225
13.03	1.65443	0.89226	1.67356	1.80291	1.92991	0.931524	0.994091	1.79754	1.87988	1.12671
13.04	1.64929	0.886566	1.66843	1.79789	1.92498	0.925866	0.988432	1.79251	1.87493	1.12117
13.05	1.64415	0.880871	1.66331	1.79287	1.92005	0.920207	0.982773	1.78747	1.86999	1.11562
13.06	1.639	0.875176	1.65818	1.78785	1.91512	0.914549	0.977115	1.78244	1.86504	1.11008
13.07	1.63386	0.869482	1.65305	1.78283	1.91019	0.908891	0.971456	1.77741	1.86009	1.10454
13.08	1.62872	0.863787	1.64793	1.77781	1.90526	0.903233	0.965797	1.77238	1.85514	1.099
13.09	1.62357	0.858092	1.6428	1.77279	1.90033	0.897575	0.960138	1.76735	1.8502	1.09346
13.1	1.61843	0.852398	1.63768	1.76777	1.89541	0.891917	0.954479	1.76231	1.84525	1.08792
13.11	1.61329	0.846703	1.63255	1.76274	1.89048	0.886259	0.94882	1.75728	1.8403	1.08237
13.12	1.60814	0.841008	1.62742	1.75772	1.88555	0.880601	0.943162	1.75225	1.83535	1.07683
13.13	1.603	0.835314	1.6223	1.7527	1.88062	0.874943	0.937503	1.74722	1.83041	1.07129
13.14	1.59786	0.829619	1.61717	1.74768	1.87569	0.869285	0.931844	1.74218	1.82546	1.06575
13.15	1.59271	0.823924	1.61204	1.74266	1.87076	0.863627	0.926185	1.73715	1.82051	1.06021
13.16	1.58757	0.818229	1.60692	1.73764	1.86583	0.857969	0.920526	1.73212	1.81556	1.05467
13.17	1.58243	0.812535	1.60179	1.73262	1.8609	0.852311	0.914868	1.72709	1.81062	1.04913
13.18	1.57728	0.80684	1.59667	1.7276	1.85597	0.846653	0.909209	1.72205	1.80567	1.04358
13.19	1.57214	0.801145	1.59154	1.72258	1.85104	0.840995	0.90355	1.71702	1.80072	1.03804
13.2	1.56699	0.795451	1.58641	1.71756	1.84612	0.835337	0.897891	1.71199	1.79577	1.0325
13.21	1.56185	0.789756	1.58129	1.71253	1.84119	0.829679	0.892232	1.70696	1.79083	1.02696
13.22	1.55671	0.784061	1.57616	1.70751	1.83626	0.824021	0.886574	1.70193	1.78588	1.02142
13.23	1.55156	0.778367	1.57104	1.70249	1.83133	0.818363	0.880915	1.69689	1.78093	1.01588
13.24	1.54642	0.772672	1.56591	1.69747	1.8264	0.812705	0.875256	1.69186	1.77598	1.01034
13.25	1.54128	0.766977	1.56078	1.69245	1.82147	0.807047	0.869597	1.68683	1.77104	1.00479
13.26	1.53613	0.761283	1.55566	1.68743	1.81654	0.801389	0.863938	1.6818	1.76609	0.999252
13.27	1.53099	0.755588	1.55053	1.68241	1.81161	0.795731	0.858279	1.67676	1.76114	0.993711
13.28	1.52585	0.749893	1.54541	1.67739	1.80668	0.790073	0.852621	1.67173	1.75619	0.988169
13.29	1.5207	0.744199	1.54028	1.67237	1.80175	0.784415	0.846962	1.6667	1.75124	0.982628
13.3	1.51556	0.738504	1.53515	1.66734	1.79682	0.778757	0.841303	1.66167	1.7463	0.977086
13.31	1.51042	0.732809	1.53003	1.66232	1.7919	0.773099	0.835644	1.65664	1.74135	0.971545
13.32	1.50527	0.727114	1.5249	1.6573	1.78697	0.767441	0.829985	1.6516	1.7364	0.966003
13.33	1.50013	0.72142	1.51977	1.65228	1.78204	0.761783	0.824327	1.64657	1.73145	0.960462
13.34	1.49499	0.715725	1.51465	1.64726	1.77711	0.756125	0.818668	1.64154	1.72651	0.95492
13.35	1.48984	0.71003	1.50952	1.64224	1.77218	0.750467	0.813009	1.63651	1.72156	0.949379
13.36	1.4847	0.704336	1.5044	1.63722	1.76725	0.744808	0.80735	1.63147	1.71661	0.943837
13.37	1.47956	0.698641	1.49927	1.6322	1.76232	0.73915	0.801691	1.62644	1.71166	0.938296
13.38	1.47441	0.692946	1.49414	1.62718	1.75739	0.733492	0.796033	1.62141	1.70672	0.932754
13.39	1.46927	0.687252	1.48902	1.62216	1.75246	0.727834	0.790374	1.61638	1.70177	0.927213
13.4	1.46413	0.681557	1.48389	1.61713	1.74753	0.722176	0.784715	1.61134	1.69682	0.921671
13.41	1.45898	0.675862	1.47877	1.61211	1.74261	0.716518	0.779056	1.60631	1.69187	0.91613
13.42	1.45384	0.670168	1.47364	1.60709	1.73768	0.71086	0.773397	1.60128	1.68693	0.910588
13.43	1.44869	0.664473	1.46851	1.60207	1.73275	0.705202	0.767738	1.59625	1.68198	0.905047
13.44	1.44355	0.658778	1.46339	1.59705	1.72782	0.699544	0.76208	1.59122	1.67703	0.899505
13.45	1.43841	0.653084	1.45826	1.59203	1.72289	0.693886	0.756421	1.58618	1.67208	0.893964
13.46	1.43326	0.647389	1.45314	1.58701	1.71796	0.688228	0.750762	1.58115	1.66714	0.888422
13.47	1.42812	0.641694	1.44801	1.58199	1.71303	0.68257	0.745103	1.57612	1.66219	0.88288
13.48	1.42298	0.635999	1.44288	1.57697	1.7081	0.676912	0.739444	1.57109	1.65724	0.877339
13.49	1.41783	0.630305	1.43776	1.57195	1.70317	0.671254	0.733786	1.56605	1.65229	0.871797
13.5	1.41269	0.62461	1.43263	1.56692	1.69824	0.665596	0.728127	1.56102	1.64735	0.866256
13.51	1.40755	0.618915	1.4275	1.5619	1.69332	0.659938	0.722468	1.55599	1.6424	0.860714
13.52	1.4024	0.613221	1.42238	1.55688	1.68839	0.65428	0.716809	1.55096	1.63745	0.855173
13.53	1.39726	0.607526	1.41725	1.55186	1.68346	0.648622	0.71115	1.54592	1.6325	0.849631
13.54	1.39212	0.601831	1.41213	1.54684	1.67853	0.642964	0.705491	1.54089	1.62756	0.84409
13.55	1.38697	0.596137	1.407	1.54182	1.6736	0.637306	0.699833	1.53586	1.62261	0.838548
13.56	1.38183	0.590442	1.40187	1.5368	1.66867	0.631648	0.694174	1.53083	1.61766	0.833007
13.57	1.37669	0.584747	1.39675	1.53178	1.66374	0.62599	0.688515	1.5258	1.61271	0.827465
13.58	1.37154	0.579053	1.39162	1.52676	1.65881	0.620332	0.682856	1.52076	1.60777	0.821924
13.59	1.3664	0.573358	1.3865	1.52173	1.65388	0.614674	0.677197	1.51573	1.60282	0.816382
13.6	1.36126	0.567663	1.38137	1.51671	1.64895	0.609016	0.671539	1.5107	1.59787	0.810841
13.61	1.35611	0.561969	1.37624	1.51169	1.64403	0.603358	0.66588	1.50567	1.59292	0.805299
13.62	1.35097	0.556274	1.37112	1.50667	1.6391	0.5977	0.660221	1.50063	1.58798	0.799758
13.63	1.34583	0.550579	1.36599	1.50165	1.63417	0.592042	0.654562	1.4956	1.58303	0.794216
13.64	1.34068	0.544885	1.36087	1.49663	1.62924	0.586384	0.648903	1.49057	1.57808	0.788675
13.65	1.33554	0.53919	1.35574	1.49161	1.62431	0.580726	0.643245	1.48554	1.57313	0.783133
13.66	1.33039	0.533495	1.35061	1.48659	1.61938	0.575068	0.637586	1.4805	1.56818	0.777592
13.67	1.32525	0.5278	1.34549	1.48157	1.61445	0.56941	0.631927	1.47547	1.56324	0.77205
13.68	1.32011	0.522106	1.34036	1.47655	1.60952	0.563751	0.626268	1.47044	1.55829	0.766509
13.69	1.31496	0.516411	1.33523	1.47152	1.60459	0.558093	0.620609	1.46541	1.55334	0.760967
13.7	1.30982	0.510716	1.33011	1.4665	1.59966	0.552435	0.61495	1.46038	1.54839	0.755426
13.71	1.30468	0.505022	1.32498	1.46148	1.59473	0.546777	0.609292	1.45534	1.54345	0.749884
13.72	1.29953	0.499327	1.31986	1.45646	1.58981	0.541119	0.603633	1.45031	1.5385	0.744343
13.73	1.29439	0.493632	1.31473	1.45144	1.58488	0.535461	0.597974	1.44528	1.53355	0.738801
13.74	1.28925	0.487938	1.3096	1.44642	1.57995	0.529803	0.592315	1.44025	1.5286	0.73326
13.75	1.2841	0.482243	1.30448	1.4414	1.57502	0.524145	0.586656	1.43521	1.52366	0.727718
13.76	1.27896	0.476548	1.29935	1.43638	1.57009	0.518487	0.580998	1.43018	1.51871	0.722177
13.77	1.27382	0.470854	1.29423	1.43136	1.56516	0.512829	0.575339	1.42515	1.51376	0.716635
13.78	1.26867	0.465159	1.2891	1.42633	1.56023	0.507171	0.56968	1.42012	1.50881	0.711094
13.79	1.26353	0.459464	1.28397	1.42131	1.5553	0.501513	0.564021	1.41508	1.50387	0.705552
13.8	1.25839	0.45377	1.27885	1.41629	1.55037	0.495855	0.558362	1.41005	1.49892	0.700011
13.81	1.25324	0.448075	1.27372	1.41127	1.54544	0.490197	0.552704	1.40502	1.49397	0.694469
13.82	1.2481	0.44238	1.2686	1.40625	1.54052	0.484539	0.547045	1.39999	1.48902	0.688928
13.83	1.24296	0.436685	1.26347	1.40123	1.53559	0.478881	0.541386	1.39496	1.48408	0.683386
13.84	1.23781	0.430991	1.25834	1.39621	1.53066	0.473223	0.535727	1.38992	1.47913	0.677845
13.85	1.23267	0.425296	1.25322	1.39119	1.52573	0.467565	0.530068	1.38489	1.47418	0.672303
13.86	1.22753	0.419601	1.24809	1.38617	1.5208	0.461907	0.524409	1.37986	1.46923	0.666762
13.87	1.22238	0.413907	1.24296	1.38115	1.51587	0.456249	0.518751	1.37483	1.46429	0.66122
13.88	1.21724	0.408212	1.23784	1.37612	1.51094	0.450591	0.513092	1.36979	1.45934	0.655679
13.89	1.21209	0.402517	1.23271	1.3711	1.50601	0.444933	0.507433	1.36476	1.45439	0.650137
13.9	1.20695	0.396823	1.22759	1.36608	1.50108	0.439275	0.501774	1.35973	1.44944	0.644596
13.91	1.20181	0.391128	1.22246	1.36106	1.49615	0.433617	0.496115	1.3547	1.4445	0.639054
13.92	1.19666	0.385433	1.21733	1.35604	1.49123	0.427959	0.490457	1.34966	1.43955	0.633513
13.93	1.19152	0.379739	1.21221	1.35102	1.4863	0.422301	0.484798	1.34463	1.4346	0.627971
13.94	1.18638	0.374044	1.20708	1.346	1.48137	0.416643	0.479139	1.3396	1.42965	0.622429
13.95	1.18123	0.368349	1.20196	1.34098	1.47644	0.410985	0.47348	1.33457	1.42471	0.616888
13.96	1.17609	0.362655	1.19683	1.33596	1.47151	0.405327	0.467821	1.32954	1.41976	0.611346
13.97	1.17095	0.35696	1.1917	1.33093	1.46658	0.399669	0.462163	1.3245	1.41481	0.605805
13.98	1.1658	0.351265	1.18658	1.32591	1.46165	0.394011	0.456504	1.31947	1.40986	0.600263
13.99	1.16066	0.34557	1.18145	1.32089	1.45672	0.388352	0.450845	1.31444	1.40492	0.594722
14	1.15552	0.339876	1.17633	1.31587	1.45179	0.382694	0.445186	1.30941	1.39997	0.58918
14.01	1.15037	0.334181	1.1712	1.31085	1.44686	0.377036	0.439527	1.30437	1.39502	0.583639
14.02	1.14523	0.328486	1.16607	1.30583	1.44194	0.371378	0.433868	1.29934	1.39007	0.578097
14.03	1.14009	0.322792	1.16095	1.30081	1.43701	0.36572	0.42821	1.29431	1.38512	0.572556
14.04	1.13494	0.317097	1.15582	1.29579	1.43208	0.360062	0.422551	1.28928	1.38018	0.567014
14.05	1.1298	0.311402	1.15069	1.29077	1.42715	0.354404	0.416892	1.28424	1.37523	0.561473
14.06	1.12466	0.305708	1.14557	1.28575	1.42222	0.348746	0.411233	1.27921	1.37028	0.555931
14.07	1.11951	0.300013	1.14044	1.28072	1.41729	0.343088	0.405574	1.27418	1.36533	0.55039
14.08	1.11437	0.294318	1.13532	1.2757	1.41236	0.33743	0.399916	1.26915	1.36039	0.544848
14.09	1.10922	0.288624	1.13019	1.27068	1.40743	0.331772	0.394257	1.26412	1.35544	0.539307
14.1	1.10408	0.282929	1.12506	1.26566	1.4025	0.326114	0.388598	1.25908	1.35049	0.533765
14.11	1.09894	0.277234	1.11994	1.26064	1.39757	0.320456	0.382939	1.25405	1.34554	0.528224
14.12	1.09379	0.27154	1.11481	1.25562	1.39264	0.314798	0.37728	1.24902	1.3406	0.522682
14.13	1.08865	0.265845	1.10969	1.2506	1.38772	0.30914	0.371621	1.24399	1.33565	0.517141
14.14	1.08351	0.26015	1.10456	1.24558	1.38279	0.303482	0.365963	1.23895	1.3307	0.511599
14.15	1.07836	0.254455	1.09943	1.24056	1.37786	0.297824	0.360304	1.23392	1.32575	0.506058
14.16	1.07322	0.248761	1.09431	1.23553	1.37293	0.292166	0.354645	1.22889	1.32081	0.500516
14.17	1.06808	0.243066	1.08918	1.23051	1.368	0.286508	0.348986	1.22386	1.31586	0.494975
14.18	1.06293	0.237371	1.08406	1.22549	1.36307	0.28085	0.343327	1.21882	1.31091	0.489433
14.19	1.05779	0.231677	1.07893	1.22047	1.35814	0.275192	0.337669	1.21379	1.30596	0.483892
14.2	1.05265	0.225982	1.0738	1.21545	1.35321	0.269534	0.33201	1.20876	1.30102	0.47835
14.21	1.0475	0.220287	1.06868	1.21043	1.34828	0.263876	0.326351	1.20373	1.29607	0.472809
14.22	1.04236	0.214593	1.06355	1.20541	1.34335	0.258218	0.320692	1.1987	1.29112	0.467267
14.23	1.03722	0.208898	1.05842	1.20039	1.33843	0.25256	0.315033	1.19366	1.28617	0.461726
14.24	1.03207	0.203203	1.0533	1.19537	1.3335	0.246902	0.309375	1.18863	1.28123	0.456184
14.25	1.02693	0.197509	1.04817	1.19035	1.32857	0.241244	0.303716	1.1836	1.27628	0.450643
14.26	1.02179	0.191814	1.04305	1.18532	1.32364	0.235586	0.298057	1.17857	1.27133	0.445101
14.27	1.01664	0.186119	1.03792	1.1803	1.31871	0.229928	0.292398	1.17353	1.26638	0.43956
14.28	1.0115	0.180425	1.03279	1.17528	1.31378	0.22427	0.286739	1.1685	1.26144	0.434018
14.29	1.00636	0.17473	1.02767	1.17026	1.30885	0.218612	0.28108	1.16347	1.25649	0.428477
14.3	1.00121	0.169035	1.02254	1.16524	1.30392	0.212953	0.275422	1.15844	1.25154	0.422935
14.31	0.996068	0.163341	1.01742	1.16022	1.29899	0.207295	0.269763	1.15341	1.24659	0.417394
14.32	0.990925	0.157646	1.01229	1.1552	1.29406	0.201637	0.264104	1.14837	1.24165	0.411852
14.33	0.985781	0.151951	1.00716	1.15018	1.28914	0.195979	0.258445	1.14334	1.2367	0.406311
14.34	0.980638	0.146256	1.00204	1.14516	1.28421	0.190321	0.252786	1.13831	1.23175	0.400769
14.35	0.975495	0.140562	0.996912	1.14013	1.27928	0.184663	0.247128	1.13328	1.2268	0.395228
14.36	0.970351	0.134867	0.991785	1.13511	1.27435	0.179005	0.241469	1.12824	1.22186	0.389686
14.37	0.965208	0.129172	0.986659	1.13009	1.26942	0.173347	0.23581	1.12321	1.21691	0.384145
14.38	0.960064	0.123478	0.981533	1.12507	1.26449	0.167689	0.230151	1.11818	1.21196	0.378603
14.39	0.954921	0.117783	0.976407	1.12005	1.25956	0.162031	0.224492	1.11315	1.20701	0.373062
14.4	0.949777	0.112088	0.971281	1.11503	1.25463	0.156373	0.218834	1.10811	1.20206	0.36752
14.41	0.944634	0.106394	0.966155	1.11001	1.2497	0.150715	0.213175	1.10308	1.19712	0.361978
14.42	0.93949	0.100699	0.961029	1.10499	1.24477	0.145057	0.207516	1.09805	1.19217	0.356437
14.43	0.934347	0.0950043	0.955903	1.09997	1.23985	0.139399	0.201857	1.09302	1.18722	0.350895
14.44	0.929203	0.0893096	0.950777	1.09495	1.23492	0.133741	0.196198	1.08799	1.18227	0.345354
14.45	0.92406	0.0836149	0.94565	1.08992	1.22999	0.128083	0.190539	1.08295	1.17733	0.339812
14.46	0.918916	0.0779202	0.940524	1.0849	1.22506	0.122425	0.184881	1.07792	1.17238	0.334271
14.47	0.913773	0.0722255	0.935398	1.07988	1.22013	0.116767	0.179222	1.07289	1.16743	0.328729
14.48	0.908629	0.0665308	0.930272	1.07486	1.2152	0.111109	0.173563	1.06786	1.16248	0.323188
14.49	0.903486	0.0608362	0.925146	1.06984	1.21027	0.105451	0.167904	1.06282	1.15754	0.317646
14.5	0.898342	0.0551415	0.92002	1.06482	1.20534	0.0997929	0.162245	1.05779	1.15259	0.312105
14.51	0.893199	0.0494468	0.914894	1.0598	1.20041	0.0941348	0.156587	1.05276	1.14764	0.306563
14.52	0.888055	0.0437521	0.909768	1.05478	1.19548	0.0884768	0.150928	1.04773	1.14269	0.301022
14.53	0.882912	0.0380574	0.904642	1.04976	1.19055	0.0828188	0.145269	1.04269	1.13775	0.29548
14.54	0.877768	0.0323627	0.899515	1.04473	1.18563	0.0771607	0.13961	1.03766	1.1328	0.289939
14.55	0.872625	0.026668	0.894389	1.03971	1.1807	0.0715027	0.133951	1.03263	1.12785	0.284397
14.56	0.867481	0.0209734	0.889263	1.03469	1.17577	0.0658447	0.128293	1.0276	1.1229	0.278856
14.57	0.862338	0.0152787	0.884137	1.02967	1.17084	0.0601866	0.122634	1.02257	1.11796	0.273314
14.58	0.857194	0.00958398	0.879011	1.02465	1.16591	0.0545286	0.116975	1.01753	1.11301	0.267773
14.59	0.852051	0.0038893	0.873885	1.01963	1.16098	0.0488706	0.111316	1.0125	1.10806	0.262231
14.6	0.846908	-0.00180539	0.868759	1.01461	1.15605	0.0432125	0.105657	1.00747	1.10311	0.25669
14.61	0.841764	-0.00750008	0.863633	1.00959	1.15112	0.0375545	0.0999984	1.00244	1.09817	0.251148
14.62	0.836621	-0.0131948	0.858507	1.00457	1.14619	0.0318965	0.0943396	0.997404	1.09322	0.245607
14.63	0.831477	-0.0188895	0.853381	0.999545	1.14126	0.0262384	0.0886808	0.992371	1.08827	0.240065
14.64	0.826334	-0.0245841	0.848254	0.994524	1.13634	0.0205804	0.083022	0.987339	1.08332	0.234524
14.65	0.82119	-0.0302788	0.843128	0.989503	1.13141	0.0149224	0.0773632	0.982307	1.07838	0.228982
14.66	0.816047	-0.0359735	0.838002	0.984482	1.12648	0.00926434	0.0717044	0.977274	1.07343	0.223441
14.67	0.810903	-0.0416682	0.832876	0.979461	1.12155	0.00360631	0.0660455	0.972242	1.06848	0.217899
14.68	0.80576	-0.0473629	0.82775	0.97444	1.11662	-0.00205172	0.0603867	0.96721	1.06353	0.212358
14.69	0.800616	-0.0530576	0.822624	0.969419	1.11169	-0.00770976	0.0547279	0.962178	1.05859	0.206816
14.7	0.795473	-0.0587523	0.817498	0.964398	1.10676	-0.0133678	0.0490691	0.957145	1.05364	0.201275
14.71	0.790329	-0.0644469	0.812372	0.959377	1.10183	-0.0190258	0.0434103	0.952113	1.04869	0.195733
14.72	0.785186	-0.0701416	0.807246	0.954356	1.0969	-0.0246839	0.0377515	0.947081	1.04374	0.190192
14.73	0.780042	-0.0758363	0.802119	0.949335	1.09197	-0.0303419	0.0320927	0.942048	1.03879	0.18465
14.74	0.774899	-0.081531	0.796993	0.944313	1.08705	-0.0359999	0.0264339	0.937016	1.03385	0.179109
14.75	0.769755	-0.0872257	0.791867	0.939292	1.08212	-0.0416579	0.020775	0.931984	1.0289	0.173567
14.76	0.764612	-0.0929204	0.786741	0.934271	1.07719	-0.047316	0.0151162	0.926951	1.02395	0.168026
14.77	0.759468	-0.0986151	0.781615	0.92925	1.07226	-0.052974	0.00945741	0.921919	1.019	0.162484
14.78	0.754325	-0.10431	0.776489	0.924229	1.06733	-0.058632	0.0037986	0.916887	1.01406	0.156943
14.79	0.749181	-0.110004	0.771363	0.919208	1.0624	-0.0642901	-0.00186021	0.911855	1.00911	0.151401
14.8	0.744038	-0.115699	0.766237	0.914187	1.05747	-0.0699481	-0.00751903	0.906822	1.00416	0.14586
14.81	0.738894	-0.121394	0.761111	0.909166	1.05254	-0.0756061	-0.0131778	0.90179	0.999214	0.140318
14.82	0.733751	-0.127088	0.755984	0.904145	1.04761	-0.0812642	-0.0188367	0.896758	0.994267	0.134777
14.83	0.728607	-0.132783	0.750858	0.899124	1.04268	-0.0869222	-0.0244955	0.891725	0.989319	0.129235
14.84	0.723464	-0.138478	0.745732	0.894103	1.03776	-0.0925802	-0.0301543	0.886693	0.984372	0.123694
14.85	0.718321	-0.144173	0.740606	0.889082	1.03283	-0.0982383	-0.0358131	0.881661	0.979424	0.118152
14.86	0.713177	-0.149867	0.73548	0.884061	1.0279	-0.103896	-0.0414719	0.876628	0.974477	0.112611
14.87	0.708034	-0.155562	0.730354	0.87904	1.02297	-0.109554	-0.0471307	0.871596	0.969529	0.107069
14.88	0.70289	-0.161257	0.725228	0.874019	1.01804	-0.115212	-0.0527895	0.866564	0.964581	0.101527
14.89	0.697747	-0.166951	0.720102	0.868998	1.01311	-0.12087	-0.0584484	0.861532	0.959634	0.095986
14.9	0.692603	-0.172646	0.714976	0.863977	1.00818	-0.126528	-0.0641072	0.856499	0.954686	0.0904445
14.91	0.68746	-0.178341	0.709849	0.858956	1.00325	-0.132186	-0.069766	0.851467	0.949739	0.084903
14.92	0.682316	-0.184035	0.704723	0.853935	0.998323	-0.137844	-0.0754248	0.846435	0.944791	0.0793614
14.93	0.677173	-0.18973	0.699597	0.848913	0.993394	-0.143503	-0.0810836	0.841402	0.939844	0.0738199
14.94	0.672029	-0.195425	0.694471	0.843892	0.988465	-0.149161	-0.0867424	0.83637	0.934896	0.0682784
14.95	0.666886	-0.201119	0.689345	0.838871	0.983536	-0.154819	-0.0924012	0.831338	0.929948	0.0627369
14.96	0.661742	-0.206814	0.684219	0.83385	0.978607	-0.160477	-0.09806	0.826305	0.925001	0.0571954
14.97	0.656599	-0.212509	0.679093	0.828829	0.973678	-0.166135	-0.103719	0.821273	0.920053	0.0516539
14.98	0.651455	-0.218203	0.673967	0.823808	0.968749	-0.171793	-0.109378	0.816241	0.915106	0.0461124
14.99	0.646312	-0.223898	0.668841	0.818787	0.96382	-0.177451	-0.115036	0.811209	0.910158	0.0405709
15	0.641168	-0.229593	0.663715	0.813766	0.958891	-0.183109	-0.120695	0.806176	0.905211	0.0350294
15.01	0.636025	-0.235288	0.658588	0.808745	0.953962	-0.188767	-0.126354	0.801144	0.900263	0.0294878
15.02	0.630881	-0.240982	0.653462	0.803724	0.949033	-0.194425	-0.132013	0.796112	0.895315	0.0239463
15.03	0.625738	-0.246677	0.648336	0.798703	0.944104	-0.200083	-0.137672	0.791079	0.890368	0.0184048
15.04	0.620594	-0.252372	0.64321	0.793682	0.939175	-0.205741	-0.143331	0.786047	0.88542	0.0128633
15.05	0.615451	-0.258066	0.638084	0.788661	0.934245	-0.211399	-0.148989	0.781015	0.880473	0.0073218
15.06	0.610307	-0.263761	0.632958	0.78364	0.929316	-0.217057	-0.154648	0.775982	0.875525	0.00178029
15.07	0.605164	-0.269456	0.627832	0.778619	0.924387	-0.222715	-0.160307	0.77095	0.870578	-0.00376122
15.08	0.60002	-0.27515	0.622706	0.773598	0.919458	-0.228373	-0.165966	0.765918	0.86563	-0.00930273
15.09	0.594877	-0.280845	0.61758	0.768577	0.914529	-0.234031	-0.171625	0.760886	0.860682	-0.0148442
15.1	0.589734	-0.28654	0.612453	0.763556	0.9096	-0.239689	-0.177283	0.755853	0.855735	-0.0203858
15.11	0.58459	-0.292234	0.607327	0.758535	0.904671	-0.245347	-0.182942	0.750821	0.850787	-0.0259273
15.12	0.579447	-0.297929	0.602201	0.753513	0.899742	-0.251005	-0.188601	0.745789	0.84584	-0.0314688
15.13	0.574303	-0.303624	0.597075	0.748492	0.894813	-0.256663	-0.19426	0.740756	0.840892	-0.0370103
15.14	0.56916	-0.309318	0.591949	0.743471	0.889884	-0.262321	-0.199919	0.735724	0.835945	-0.0425518
15.15	0.564016	-0.315013	0.586823	0.73845	0.884955	-0.267979	-0.205578	0.730692	0.830997	-0.0480933
15.16	0.558873	-0.320708	0.581697	0.733429	0.880026	-0.273637	-0.211236	0.725659	0.826049	-0.0536348
15.17	0.553729	-0.326403	0.576571	0.728408	0.875097	-0.279295	-0.216895	0.720627	0.821102	-0.0591763
15.18	0.548586	-0.332097	0.571445	0.723387	0.870168	-0.284953	-0.222554	0.715595	0.816154	-0.0647178
15.19	0.543442	-0.337792	0.566318	0.718366	0.865239	-0.290611	-0.228213	0.710563	0.811207	-0.0702593
15.2	0.538299	-0.343487	0.561192	0.713345	0.86031	-0.296269	-0.233872	0.70553	0.806259	-0.0758009
15.21	0.533155	-0.349181	0.556066	0.708324	0.855381	-0.301927	-0.23953	0.700498	0.801312	-0.0813424
15.22	0.528012	-0.354876	0.55094	0.703303	0.850452	-0.307585	-0.245189	0.695466	0.796364	-0.0868839
15.23	0.522868	-0.360571	0.545814	0.698282	0.845523	-0.313243	-0.250848	0.690433	0.791416	-0.0924254
15.24	0.517725	-0.366265	0.540688	0.693261	0.840594	-0.318902	-0.256507	0.685401	0.786469	-0.0979669
15.25	0.512581	-0.37196	0.535562	0.68824	0.835665	-0.32456	-0.262166	0.680369	0.781521	-0.103508
15.26	0.507438	-0.377655	0.530436	0.683219	0.830736	-0.330218	-0.267824	0.675336	0.776574	-0.10905
15.27	0.502294	-0.383349	0.52531	0.678198	0.825807	-0.335876	-0.273483	0.670304	0.771626	-0.114591
15.28	0.497151	-0.389044	0.520183	0.673177	0.820878	-0.341534	-0.279142	0.665272	0.766679	-0.120133
15.29	0.492007	-0.394739	0.515057	0.668156	0.815949	-0.347192	-0.284801	0.66024	0.761731	-0.125674
15.3	0.486864	-0.400433	0.509931	0.663135	0.81102	-0.35285	-0.29046	0.655207	0.756783	-0.131216
15.31	0.48172	-0.406128	0.504805	0.658113	0.806091	-0.358508	-0.296119	0.650175	0.751836	-0.136757
15.32	0.476577	-0.411823	0.499679	0.653092	0.801162	-0.364166	-0.301777	0.645143	0.746888	-0.142299
15.33	0.471433	-0.417517	0.494553	0.648071	0.796233	-0.369824	-0.307436	0.64011	0.741941	-0.147841
15.34	0.46629	-0.423212	0.489427	0.64305	0.791304	-0.375482	-0.313095	0.635078	0.736993	-0.153382
15.35	0.461147	-0.428907	0.484301	0.638029	0.786375	-0.38114	-0.318754	0.630046	0.732046	-0.158924
15.36	0.456003	-0.434602	0.479175	0.633008	0.781446	-0.386798	-0.324413	0.625013	0.727098	-0.164465
15.37	0.45086	-0.440296	0.474049	0.627987	0.776517	-0.392456	-0.330071	0.619981	0.72215	-0.170007
15.38	0.445716	-0.445991	0.468922	0.622966	0.771588	-0.398114	-0.33573	0.614949	0.717203	-0.175548
15.39	0.440573	-0.451686	0.463796	0.617945	0.766659	-0.403772	-0.341389	0.609917	0.712255	-0.18109
15.4	0.435429	-0.45738	0.45867	0.612924	0.76173	-0.40943	-0.347048	0.604884	0.707308	-0.186631
15.41	0.430286	-0.463075	0.453544	0.607903	0.756801	-0.415088	-0.352707	0.599852	0.70236	-0.192173
15.42	0.425142	-0.46877	0.448418	0.602882	0.751872	-0.420746	-0.358365	0.59482	0.697413	-0.197714
15.43	0.419999	-0.474464	0.443292	0.597861	0.746943	-0.426404	-0.364024	0.589787	0.692465	-0.203256
15.44	0.414855	-0.480159	0.438166	0.59284	0.742014	-0.432062	-0.369683	0.584755	0.687517	-0.208797
15.45	0.409712	-0.485854	0.43304	0.587819	0.737084	-0.43772	-0.375342	0.579723	0.68257	-0.214339
15.46	0.404568	-0.491548	0.427914	0.582798	0.732155	-0.443378	-0.381001	0.57469	0.677622	-0.21988
15.47	0.399425	-0.497243	0.422787	0.577777	0.727226	-0.449036	-0.38666	0.569658	0.672675	-0.225422
15.48	0.394281	-0.502938	0.417661	0.572756	0.722297	-0.454694	-0.392318	0.564626	0.667727	-0.230963
15.49	0.389138	-0.508632	0.412535	0.567735	0.717368	-0.460352	-0.397977	0.559594	0.66278	-0.236505
15.5	0.383994	-0.514327	0.407409	0.562714	0.712439	-0.46601	-0.403636	0.554561	0.657832	-0.242046
15.51	0.378851	-0.520022	0.402283	0.557692	0.70751	-0.471668	-0.409295	0.549529	0.652885	-0.247588
15.52	0.373707	-0.525717	0.397157	0.552671	0.702581	-0.477326	-0.414954	0.544497	0.647937	-0.253129
15.53	0.368564	-0.531411	0.392031	0.54765	0.697652	-0.482984	-0.420612	0.539464	0.642989	-0.258671
15.54	0.36342	-0.537106	0.386905	0.542629	0.692723	-0.488642	-0.426271	0.534432	0.638042	-0.264212
15.55	0.358277	-0.542801	0.381779	0.537608	0.687794	-0.494301	-0.43193	0.5294	0.633094	-0.269754
15.56	0.353133	-0.548495	0.376652	0.532587	0.682865	-0.499959	-0.437589	0.524367	0.628147	-0.275295
15.57	0.34799	-0.55419	0.371526	0.527566	0.677936	-0.505617	-0.443248	0.519335	0.623199	-0.280837
15.58	0.342846	-0.559885	0.3664	0.522545	0.673007	-0.511275	-0.448906	0.514303	0.618252	-0.286378
15.59	0.337703	-0.565579	0.361274	0.517524	0.668078	-0.516933	-0.454565	0.509271	0.613304	-0.29192
15.6	0.33256	-0.571274	0.356148	0.512503	0.663149	-0.522591	-0.460224	0.504238	0.608356	-0.297461
15.61	0.327416	-0.576969	0.351022	0.507482	0.65822	-0.528249	-0.465883	0.499206	0.603409	-0.303003
15.62	0.322273	-0.582663	0.345896	0.502461	0.653291	-0.533907	-0.471542	0.494174	0.598461	-0.308544
15.63	0.317129	-0.588358	0.34077	0.49744	0.648362	-0.539565	-0.477201	0.489141	0.593514	-0.314086
15.64	0.311986	-0.594053	0.335644	0.492419	0.643433	-0.545223	-0.482859	0.484109	0.588566	-0.319627
15.65	0.306842	-0.599747	0.330517	0.487398	0.638504	-0.550881	-0.488518	0.479077	0.583619	-0.325169
15.66	0.301699	-0.605442	0.325391	0.482377	0.633575	-0.556539	-0.494177	0.474044	0.578671	-0.33071
15.67	0.296555	-0.611137	0.320265	0.477356	0.628646	-0.562197	-0.499836	0.469012	0.573723	-0.336252
15.68	0.291412	-0.616832	0.315139	0.472335	0.623717	-0.567855	-0.505495	0.46398	0.568776	-0.341793
15.69	0.286268	-0.622526	0.310013	0.467314	0.618788	-0.573513	-0.511153	0.458948	0.563828	-0.347335
15.7	0.281125	-0.628221	0.304887	0.462292	0.613859	-0.579171	-0.516812	0.453915	0.558881	-0.352876
15.71	0.275981	-0.633916	0.299761	0.457271	0.60893	-0.584829	-0.522471	0.448883	0.553933	-0.358418
15.72	0.270838	-0.63961	0.294635	0.45225	0.604001	-0.590487	-0.52813	0.443851	0.548986	-0.363959
15.73	0.265694	-0.645305	0.289509	0.447229	0.599072	-0.596145	-0.533789	0.438818	0.544038	-0.369501
15.74	0.260551	-0.651	0.284383	0.442208	0.594143	-0.601803	-0.539448	0.433786	0.53909	-0.375042
15.75	0.255407	-0.656694	0.279256	0.437187	0.589214	-0.607461	-0.545106	0.428754	0.534143	-0.380584
15.76	0.250264	-0.662389	0.27413	0.432166	0.584285	-0.613119	-0.550765	0.423721	0.529195	-0.386125
15.77	0.24512	-0.668084	0.269004	0.427145	0.579356	-0.618777	-0.556424	0.418689	0.524248	-0.391667
15.78	0.239977	-0.673778	0.263878	0.422124	0.574427	-0.624435	-0.562083	0.413657	0.5193	-0.397208
15.79	0.234833	-0.679473	0.258752	0.417103	0.569498	-0.630093	-0.567742	0.408625	0.514353	-0.40275
15.8	0.22969	-0.685168	0.253626	0.412082	0.564569	-0.635751	-0.5734	0.403592	0.509405	-0.408292
15.81	0.224546	-0.690862	0.2485	0.407061	0.55964	-0.641409	-0.579059	0.39856	0.504457	-0.413833
15.82	0.219403	-0.696557	0.243374	0.40204	0.554711	-0.647067	-0.584718	0.393528	0.49951	-0.419375
15.83	0.214259	-0.702252	0.238248	0.397019	0.549782	-0.652725	-0.590377	0.388495	0.494562	-0.424916
15.84	0.209116	-0.707947	0.233121	0.391998	0.544852	-0.658383	-0.596036	0.383463	0.489615	-0.430458
15.85	0.203973	-0.713641	0.227995	0.386977	0.539923	-0.664041	-0.601694	0.378431	0.484667	-0.435999
15.86	0.198829	-0.719336	0.222869	0.381956	0.534994	-0.669699	-0.607353	0.373398	0.47972	-0.441541
15.87	0.193686	-0.725031	0.217743	0.376935	0.530065	-0.675358	-0.613012	0.368366	0.474772	-0.447082
15.88	0.188542	-0.730725	0.212617	0.371914	0.525136	-0.681016	-0.618671	0.363334	0.469824	-0.452624
15.89	0.183399	-0.73642	0.207491	0.366892	0.520207	-0.686674	-0.62433	0.358302	0.464877	-0.458165
15.9	0.178255	-0.742115	0.202365	0.361871	0.515278	-0.692332	-0.629989	0.353269	0.459929	-0.463707
15.91	0.173112	-0.747809	0.197239	0.35685	0.510349	-0.69799	-0.635647	0.348237	0.454982	-0.469248
15.92	0.167968	-0.753504	0.192113	0.351829	0.50542	-0.703648	-0.641306	0.343205	0.450034	-0.47479
15.93	0.162825	-0.759199	0.186986	0.346808	0.500491	-0.709306	-0.646965	0.338172	0.445087	-0.480331
15.94	0.157681	-0.764893	0.18186	0.341787	0.495562	-0.714964	-0.652624	0.33314	0.440139	-0.485873
15.95	0.152538	-0.770588	0.176734	0.336766	0.490633	-0.720622	-0.658283	0.328108	0.435191	-0.491414
15.96	0.147394	-0.776283	0.171608	0.331745	0.485704	-0.72628	-0.663941	0.323075	0.430244	-0.496956
15.97	0.142251	-0.781977	0.166482	0.326724	0.480775	-0.731938	-0.6696	0.318043	0.425296	-0.502497
15.98	0.137107	-0.787672	0.161356	0.321703	0.475846	-0.737596	-0.675259	0.313011	0.420349	-0.508039
15.99	0.131964	-0.793367	0.15623	0.316682	0.470917	-0.743254	-0.680918	0.307979	0.415401	-0.51358
16	0.12682	-0.799061	0.151104	0.311661	0.465988	-0.748912	-0.686577	0.302946	0.410454	-0.519122
16.01	0.121677	-0.804756	0.145978	0.30664	0.461059	-0.75457	-0.692235	0.297914	0.405506	-0.524663
16.02	0.116533	-0.810451	0.140851	0.301619	0.45613	-0.760228	-0.697894	0.292882	0.400558	-0.530205
16.03	0.11139	-0.816146	0.135725	0.296598	0.451201	-0.765886	-0.703553	0.287849	0.395611	-0.535746
16.04	0.106246	-0.82184	0.130599	0.291577	0.446272	-0.771544	-0.709212	0.282817	0.390663	-0.541288
16.05	0.101103	-0.827535	0.125473	0.286556	0.441343	-0.777202	-0.714871	0.277785	0.385716	-0.546829
16.06	0.0959595	-0.83323	0.120347	0.281535	0.436414	-0.78286	-0.72053	0.272752	0.380768	-0.552371
16.07	0.090816	-0.838924	0.115221	0.276514	0.431485	-0.788518	-0.726188	0.26772	0.375821	-0.557912
16.08	0.0856725	-0.844619	0.110095	0.271492	0.426556	-0.794176	-0.731847	0.262688	0.370873	-0.563454
16.09	0.080529	-0.850314	0.104969	0.266471	0.421627	-0.799834	-0.737506	0.257656	0.365925	-0.568995
16.1	0.0753855	-0.856008	0.0998426	0.26145	0.416698	-0.805492	-0.743165	0.252623	0.360978	-0.574537
16.11	0.0702421	-0.861703	0.0947165	0.256429	0.411769	-0.81115	-0.748824	0.247591	0.35603	-0.580078
16.12	0.0650986	-0.867398	0.0895904	0.251408	0.40684	-0.816808	-0.754482	0.242559	0.351083	-0.58562
16.13	0.0599551	-0.873092	0.0844643	0.246387	0.401911	-0.822466	-0.760141	0.237526	0.346135	-0.591161
16.14	0.0548116	-0.878787	0.0793382	0.241366	0.396982	-0.828124	-0.7658	0.232494	0.341188	-0.596703
16.15	0.0496681	-0.884482	0.0742121	0.236345	0.392053	-0.833782	-0.771459	0.227462	0.33624	-0.602244
16.16	0.0445247	-0.890176	0.069086	0.231324	0.387124	-0.83944	-0.777118	0.222429	0.331292	-0.607786
16.17	0.0393812	-0.895871	0.0639599	0.226303	0.382195	-0.845098	-0.782777	0.217397	0.326345	-0.613327
16.18	0.0342377	-0.901566	0.0588338	0.221282	0.377266	-0.850757	-0.788435	0.212365	0.321397	-0.618869
16.19	0.0290942	-0.907261	0.0537077	0.216261	0.372337	-0.856415	-0.794094	0.207333	0.31645	-0.62441
16.2	0.0239507	-0.912955	0.0485815	0.21124	0.367408	-0.862073	-0.799753	0.2023	0.311502	-0.629952
16.21	0.0188073	-0.91865	0.0434554	0.206219	0.362479	-0.867731	-0.805412	0.197268	0.306555	-0.635493
16.22	0.0136638	-0.924345	0.0383293	0.201198	0.35755	-0.873389	-0.811071	0.192236	0.301607	-0.641035
16.23	0.00852031	-0.930039	0.0332032	0.196177	0.352621	-0.879047	-0.816729	0.187203	0.296659	-0.646576
16.24	0.00337682	-0.935734	0.0280771	0.191156	0.347691	-0.884705	-0.822388	0.182171	0.291712	-0.652118
16.25	-0.00176666	-0.941429	0.022951	0.186135	0.342762	-0.890363	-0.828047	0.177139	0.286764	-0.657659
16.26	-0.00691014	-0.947123	0.0178249	0.181114	0.337833	-0.896021	-0.833706	0.172106	0.281817	-0.663201
16.27	-0.0120536	-0.952818	0.0126988	0.176092	0.332904	-0.901679	-0.839365	0.167074	0.276869	-0.668743
16.28	-0.0171971	-0.958513	0.00757268	0.171071	0.327975	-0.907337	-0.845023	0.162042	0.271922	-0.674284
16.29	-0.0223406	-0.964207	0.00244657	0.16605	0.323046	-0.912995	-0.850682	0.15701	0.266974	-0.679826
16.3	-0.0274841	-0.969902	-0.00267953	0.161029	0.318117	-0.918653	-0.856341	0.151977	0.262027	-0.685367
16.31	-0.0326275	-0.975597	-0.00780564	0.156008	0.313188	-0.924311	-0.862	0.146945	0.257079	-0.690909
16.32	-0.037771	-0.981291	-0.0129318	0.150987	0.308259	-0.929969	-0.867659	0.141913	0.252131	-0.69645
16.33	-0.0429145	-0.986986	-0.0180579	0.145966	0.30333	-0.935627	-0.873318	0.13688	0.247184	-0.701992
16.34	-0.048058	-0.992681	-0.023184	0.140945	0.298401	-0.941285	-0.878976	0.131848	0.242236	-0.707533
16.35	-0.0532015	-0.998376	-0.0283101	0.135924	0.293472	-0.946943	-0.884635	0.126816	0.237289	-0.713075
16.36	-0.0583449	-1.00407	-0.0334362	0.130903	0.288543	-0.952601	-0.890294	0.121783	0.232341	-0.718616
16.37	-0.0634884	-1.00976	-0.0385623	0.125882	0.283614	-0.958259	-0.895953	0.116751	0.227394	-0.724158
16.38	-0.0686319	-1.01546	-0.0436884	0.120861	0.278685	-0.963917	-0.901612	0.111719	0.222446	-0.729699
16.39	-0.0737754	-1.02115	-0.0488145	0.11584	0.273756	-0.969575	-0.90727	0.106687	0.217498	-0.735241
16.4	-0.0789189	-1.02685	-0.0539406	0.110819	0.268827	-0.975233	-0.912929	0.101654	0.212551	-0.740782
16.41	-0.0840623	-1.03254	-0.0590667	0.105798	0.263898	-0.980891	-0.918588	0.0966219	0.207603	-0.746324
16.42	-0.0892058	-1.03824	-0.0641928	0.100777	0.258969	-0.986549	-0.924247	0.0915896	0.202656	-0.751865
16.43	-0.0943493	-1.04393	-0.0693189	0.0957556	0.25404	-0.992207	-0.929906	0.0865573	0.197708	-0.757407
16.44	-0.0994928	-1.04963	-0.074445	0.0907346	0.249111	-0.997865	-0.935564	0.081525	0.192761	-0.762948
16.45	-0.104636	-1.05532	-0.0795712	0.0857135	0.244182	-1.00352	-0.941223	0.0764927	0.187813	-0.76849
16.46	-0.10978	-1.06102	-0.0846973	0.0806925	0.239253	-1.00918	-0.946882	0.0714604	0.182865	-0.774031
16.47	-0.114923	-1.06671	-0.0898234	0.0756714	0.234324	-1.01484	-0.952541	0.0664281	0.177918	-0.779573
16.48	-0.120067	-1.07241	-0.0949495	0.0706504	0.229395	-1.0205	-0.9582	0.0613958	0.17297	-0.785114
16.49	-0.12521	-1.0781	-0.100076	0.0656293	0.224466	-1.02616	-0.963859	0.0563635	0.168023	-0.790656
16.5	-0.130354	-1.0838	-0.105202	0.0606083	0.219537	-1.03181	-0.969517	0.0513312	0.163075	-0.796197
16.51	-0.135497	-1.08949	-0.110328	0.0555872	0.214608	-1.03747	-0.975176	0.0462989	0.158128	-0.801739
16.52	-0.140641	-1.09519	-0.115454	0.0505662	0.209679	-1.04313	-0.980835	0.0412666	0.15318	-0.80728
16.53	-0.145784	-1.10088	-0.12058	0.0455451	0.20475	-1.04879	-0.986494	0.0362343	0.148232	-0.812822
16.54	-0.150928	-1.10657	-0.125706	0.0405241	0.199821	-1.05445	-0.992153	0.031202	0.143285	-0.818363
16.55	-0.156071	-1.11227	-0.130832	0.035503	0.194892	-1.0601	-0.997811	0.0261697	0.138337	-0.823905
16.56	-0.161215	-1.11796	-0.135958	0.030482	0.189963	-1.06576	-1.00347	0.0211374	0.13339	-0.829446
16.57	-0.166358	-1.12366	-0.141084	0.0254609	0.185034	-1.07142	-1.00913	0.0161051	0.128442	-0.834988
16.58	-0.171501	-1.12935	-0.146211	0.0204399	0.180105	-1.07708	-1.01479	0.0110728	0.123495	-0.840529
16.59	-0.176645	-1.13505	-0.151337	0.0154188	0.175176	-1.08274	-1.02045	0.00604051	0.118547	-0.846071
16.6	-0.181788	-1.14074	-0.156463	0.0103978	0.170247	-1.08839	-1.02611	0.00100821	0.113599	-0.851612
16.61	-0.186932	-1.14644	-0.161589	0.00537671	0.165318	-1.09405	-1.03176	-0.00402409	0.108652	-0.857154
16.62	-0.192075	-1.15213	-0.166715	0.000355655	0.160389	-1.09971	-1.03742	-0.00905639	0.103704	-0.862695
16.63	-0.197219	-1.15783	-0.171841	-0.0046654	0.15546	-1.10537	-1.04308	-0.0140887	0.0987567	-0.868237
16.64	-0.202362	-1.16352	-0.176967	-0.00968645	0.15053	-1.11103	-1.04874	-0.019121	0.0938091	-0.873778
16.65	-0.207506	-1.16922	-0.182093	-0.0147075	0.145601	-1.11668	-1.0544	-0.0241533	0.0888616	-0.87932
16.66	-0.212649	-1.17491	-0.187219	-0.0197286	0.140672	-1.12234	-1.06006	-0.0291856	0.083914	-0.884861
16.67	-0.217793	-1.18061	-0.192346	-0.0247496	0.135743	-1.128	-1.06572	-0.0342179	0.0789664	-0.890403
16.68	-0.222936	-1.1863	-0.197472	-0.0297707	0.130814	-1.13366	-1.07138	-0.0392502	0.0740189	-0.895944
16.69	-0.22808	-1.19199	-0.202598	-0.0347917	0.125885	-1.13932	-1.07703	-0.0442825	0.0690713	-0.901486
16.7	-0.233223	-1.19769	-0.207724	-0.0398128	0.120956	-1.14497	-1.08269	-0.0493148	0.0641237	-0.907027
16.71	-0.238367	-1.20338	-0.21285	-0.0448338	0.116027	-1.15063	-1.08835	-0.0543471	0.0591762	-0.912569
16.72	-0.24351	-1.20908	-0.217976	-0.0498549	0.111098	-1.15629	-1.09401	-0.0593794	0.0542286	-0.91811
16.73	-0.248654	-1.21477	-0.223102	-0.0548759	0.106169	-1.16195	-1.09967	-0.0644117	0.049281	-0.923652
16.74	-0.253797	-1.22047	-0.228228	-0.059897	0.10124	-1.16761	-1.10533	-0.069444	0.0443334	-0.929194
16.75	-0.258941	-1.22616	-0.233354	-0.064918	0.0963112	-1.17326	-1.11099	-0.0744763	0.0393859	-0.934735
16.76	-0.264084	-1.23186	-0.238481	-0.0699391	0.0913822	-1.17892	-1.11665	-0.0795086	0.0344383	-0.940277
16.77	-0.269228	-1.23755	-0.243607	-0.0749601	0.0864532	-1.18458	-1.12231	-0.0845409	0.0294907	-0.945818
16.78	-0.274371	-1.24325	-0.248733	-0.0799812	0.0815241	-1.19024	-1.12796	-0.0895732	0.0245432	-0.95136
16.79	-0.279515	-1.24894	-0.253859	-0.0850022	0.0765951	-1.1959	-1.13362	-0.0946055	0.0195956	-0.956901
16.8	-0.284658	-1.25464	-0.258985	-0.0900233	0.0716661	-1.20155	-1.13928	-0.0996378	0.014648	-0.962443
16.81	-0.289802	-1.26033	-0.264111	-0.0950443	0.0667371	-1.20721	-1.14494	-0.10467	0.00970046	-0.967984
16.82	-0.294945	-1.26603	-0.269237	-0.100065	0.061808	-1.21287	-1.1506	-0.109702	0.00475289	-0.973526
16.83	-0.300088	-1.27172	-0.274363	-0.105086	0.056879	-1.21853	-1.15626	-0.114735	-0.000194681	-0.979067
16.84	-0.305232	-1.27742	-0.279489	-0.110107	0.05195	-1.22419	-1.16192	-0.119767	-0.00514225	-0.984609
16.85	-0.310375	-1.28311	-0.284615	-0.115129	0.0470209	-1.22984	-1.16758	-0.124799	-0.0100898	-0.99015
16.86	-0.315519	-1.2888	-0.289742	-0.12015	0.0420919	-1.2355	-1.17323	-0.129832	-0.0150374	-0.995692
16.87	-0.320662	-1.2945	-0.294868	-0.125171	0.0371629	-1.24116	-1.17889	-0.134864	-0.019985	-1.00123
16.88	-0.325806	-1.30019	-0.299994	-0.130192	0.0322339	-1.24682	-1.18455	-0.139896	-0.0249325	-1.00677
16.89	-0.330949	-1.30589	-0.30512	-0.135213	0.0273048	-1.25248	-1.19021	-0.144929	-0.0298801	-1.01232
16.9	-0.336093	-1.31158	-0.310246	-0.140234	0.0223758	-1.25813	-1.19587	-0.149961	-0.0348277	-1.01786
16.91	-0.341236	-1.31728	-0.315372	-0.145255	0.0174468	-1.26379	-1.20153	-0.154993	-0.0397752	-1.0234
16.92	-0.34638	-1.32297	-0.320498	-0.150276	0.0125178	-1.26945	-1.20719	-0.160025	-0.0447228	-1.02894
16.93	-0.351523	-1.32867	-0.325624	-0.155297	0.00758875	-1.27511	-1.21285	-0.165058	-0.0496704	-1.03448
16.94	-0.356667	-1.33436	-0.33075	-0.160318	0.00265972	-1.28077	-1.21851	-0.17009	-0.0546179	-1.04002
16.95	-0.36181	-1.34006	-0.335877	-0.165339	-0.0022693	-1.28642	-1.22416	-0.175122	-0.0595655	-1.04557
16.96	-0.366954	-1.34575	-0.341003	-0.17036	-0.00719833	-1.29208	-1.22982	-0.180155	-0.0645131	-1.05111
16.97	-0.372097	-1.35145	-0.346129	-0.175381	-0.0121274	-1.29774	-1.23548	-0.185187	-0.0694607	-1.05665
16.98	-0.377241	-1.35714	-0.351255	-0.180402	-0.0170564	-1.3034	-1.24114	-0.190219	-0.0744082	-1.06219
16.99	-0.382384	-1.36284	-0.356381	-0.185423	-0.0219854	-1.30906	-1.2468	-0.195252	-0.0793558	-1.06773
17	-0.387528	-1.36853	-0.361507	-0.190444	-0.0269144	-1.31472	-1.25246	-0.200284	-0.0843034	-1.07327
17.01	-0.392671	-1.37422	-0.366633	-0.195465	-0.0318435	-1.32037	-1.25812	-0.205316	-0.0892509	-1.07881
17.02	-0.397815	-1.37992	-0.371759	-0.200486	-0.0367725	-1.32603	-1.26378	-0.210348	-0.0941985	-1.08436
17.03	-0.402958	-1.38561	-0.376885	-0.205507	-0.0417015	-1.33169	-1.26943	-0.215381	-0.0991461	-1.0899
17.04	-0.408102	-1.39131	-0.382012	-0.210529	-0.0466305	-1.33735	-1.27509	-0.220413	-0.104094	-1.09544
17.05	-0.413245	-1.397	-0.387138	-0.21555	-0.0515596	-1.34301	-1.28075	-0.225445	-0.109041	-1.10098
17.06	-0.418389	-1.4027	-0.392264	-0.220571	-0.0564886	-1.34866	-1.28641	-0.230478	-0.113989	-1.10652
17.07	-0.423532	-1.40839	-0.39739	-0.225592	-0.0614176	-1.35432	-1.29207	-0.23551	-0.118936	-1.11206
17.08	-0.428675	-1.41409	-0.402516	-0.230613	-0.0663466	-1.35998	-1.29773	-0.240542	-0.123884	-1.1176
17.09	-0.433819	-1.41978	-0.407642	-0.235634	-0.0712757	-1.36564	-1.30339	-0.245575	-0.128831	-1.12315
17.1	-0.438962	-1.42548	-0.412768	-0.240655	-0.0762047	-1.3713	-1.30905	-0.250607	-0.133779	-1.12869
17.11	-0.444106	-1.43117	-0.417894	-0.245676	-0.0811337	-1.37695	-1.3147	-0.255639	-0.138727	-1.13423
17.12	-0.449249	-1.43687	-0.42302	-0.250697	-0.0860627	-1.38261	-1.32036	-0.260671	-0.143674	-1.13977
17.13	-0.454393	-1.44256	-0.428147	-0.255718	-0.0909918	-1.38827	-1.32602	-0.265704	-0.148622	-1.14531
17.14	-0.459536	-1.44826	-0.433273	-0.260739	-0.0959208	-1.39393	-1.33168	-0.270736	-0.153569	-1.15085
17.15	-0.46468	-1.45395	-0.438399	-0.26576	-0.10085	-1.39959	-1.33734	-0.275768	-0.158517	-1.1564
17.16	-0.469823	-1.45965	-0.443525	-0.270781	-0.105779	-1.40524	-1.343	-0.280801	-0.163464	-1.16194
17.17	-0.474967	-1.46534	-0.448651	-0.275802	-0.110708	-1.4109	-1.34866	-0.285833	-0.168412	-1.16748
17.18	-0.48011	-1.47103	-0.453777	-0.280823	-0.115637	-1.41656	-1.35432	-0.290865	-0.17336	-1.17302
17.19	-0.485254	-1.47673	-0.458903	-0.285844	-0.120566	-1.42222	-1.35998	-0.295898	-0.178307	-1.17856
17.2	-0.490397	-1.48242	-0.464029	-0.290865	-0.125495	-1.42788	-1.36563	-0.30093	-0.183255	-1.1841
17.21	-0.495541	-1.48812	-0.469155	-0.295886	-0.130424	-1.43353	-1.37129	-0.305962	-0.188202	-1.18964
17.22	-0.500684	-1.49381	-0.474281	-0.300907	-0.135353	-1.43919	-1.37695	-0.310994	-0.19315	-1.19519
17.23	-0.505828	-1.49951	-0.479408	-0.305929	-0.140282	-1.44485	-1.38261	-0.316027	-0.198097	-1.20073
17.24	-0.510971	-1.5052	-0.484534	-0.31095	-0.145211	-1.45051	-1.38827	-0.321059	-0.203045	-1.20627
17.25	-0.516115	-1.5109	-0.48966	-0.315971	-0.15014	-1.45617	-1.39393	-0.326091	-0.207993	-1.21181
17.26	-0.521258	-1.51659	-0.494786	-0.320992	-0.155069	-1.46182	-1.39959	-0.331124	-0.21294	-1.21735
17.27	-0.526402	-1.52229	-0.499912	-0.326013	-0.159998	-1.46748	-1.40525	-0.336156	-0.217888	-1.22289
17.28	-0.531545	-1.52798	-0.505038	-0.331034	-0.164927	-1.47314	-1.4109	-0.341188	-0.222835	-1.22844
17.29	-0.536689	-1.53368	-0.510164	-0.336055	-0.169856	-1.4788	-1.41656	-0.346221	-0.227783	-1.23398
17.3	-0.541832	-1.53937	-0.51529	-0.341076	-0.174785	-1.48446	-1.42222	-0.351253	-0.23273	-1.23952
17.31	-0.546976	-1.54507	-0.520416	-0.346097	-0.179714	-1.49011	-1.42788	-0.356285	-0.237678	-1.24506
17.32	-0.552119	-1.55076	-0.525543	-0.351118	-0.184643	-1.49577	-1.43354	-0.361317	-0.242626	-1.2506
17.33	-0.557262	-1.55645	-0.530669	-0.356139	-0.189572	-1.50143	-1.4392	-0.36635	-0.247573	-1.25614
17.34	-0.562406	-1.56215	-0.535795	-0.36116	-0.194501	-1.50709	-1.44486	-0.371382	-0.252521	-1.26168
17.35	-0.567549	-1.56784	-0.540921	-0.366181	-0.19943	-1.51275	-1.45052	-0.376414	-0.257468	-1.26723
17.36	-0.572693	-1.57354	-0.546047	-0.371202	-0.204359	-1.5184	-1.45618	-0.381447	-0.262416	-1.27277
17.37	-0.577836	-1.57923	-0.551173	-0.376223	-0.209288	-1.52406	-1.46183	-0.386479	-0.267363	-1.27831
17.38	-0.58298	-1.58493	-0.556299	-0.381244	-0.214217	-1.52972	-1.46749	-0.391511	-0.272311	-1.28385
17.39	-0.588123	-1.59062	-0.561425	-0.386265	-0.219146	-1.53538	-1.47315	-0.396544	-0.277259	-1.28939
17.4	-0.593267	-1.59632	-0.566551	-0.391286	-0.224075	-1.54104	-1.47881	-0.401576	-0.282206	-1.29493
17.41	-0.59841	-1.60201	-0.571678	-0.396307	-0.229004	-1.54669	-1.48447	-0.406608	-0.287154	-1.30047
17.42	-0.603554	-1.60771	-0.576804	-0.401329	-0.233933	-1.55235	-1.49013	-0.41164	-0.292101	-1.30602
17.43	-0.608697	-1.6134	-0.58193	-0.40635	-0.238863	-1.55801	-1.49579	-0.416673	-0.297049	-1.31156
17.44	-0.613841	-1.6191	-0.587056	-0.411371	-0.243792	-1.56367	-1.50145	-0.421705	-0.301996	-1.3171
17.45	-0.618984	-1.62479	-0.592182	-0.416392	-0.248721	-1.56933	-1.5071	-0.426737	-0.306944	-1.32264
17.46	-0.624128	-1.63049	-0.597308	-0.421413	-0.25365	-1.57498	-1.51276	-0.43177	-0.311892	-1.32818
17.47	-0.629271	-1.63618	-0.602434	-0.426434	-0.258579	-1.58064	-1.51842	-0.436802	-0.316839	-1.33372
17.48	-0.634415	-1.64188	-0.60756	-0.431455	-0.263508	-1.5863	-1.52408	-0.441834	-0.321787	-1.33927
17.49	-0.639558	-1.64757	-0.612686	-0.436476	-0.268437	-1.59196	-1.52974	-0.446867	-0.326734	-1.34481
17.5	-0.644702	-1.65326	-0.617813	-0.441497	-0.273366	-1.59762	-1.5354	-0.451899	-0.331682	-1.35035
17.51	-0.649845	-1.65896	-0.622939	-0.446518	-0.278295	-1.60327	-1.54106	-0.456931	-0.336629	-1.35589
17.52	-0.654989	-1.66465	-0.628065	-0.451539	-0.283224	-1.60893	-1.54672	-0.461963	-0.341577	-1.36143
17.53	-0.660132	-1.67035	-0.633191	-0.45656	-0.288153	-1.61459	-1.55238	-0.466996	-0.346525	-1.36697
17.54	-0.665276	-1.67604	-0.638317	-0.461581	-0.293082	-1.62025	-1.55803	-0.472028	-0.351472	-1.37251
17.55	-0.670419	-1.68174	-0.643443	-0.466602	-0.298011	-1.62591	-1.56369	-0.47706	-0.35642	-1.37806
17.56	-0.675563	-1.68743	-0.648569	-0.471623	-0.30294	-1.63156	-1.56935	-0.482093	-0.361367	-1.3836
17.57	-0.680706	-1.69313	-0.653695	-0.476644	-0.307869	-1.63722	-1.57501	-0.487125	-0.366315	-1.38914
17.58	-0.685849	-1.69882	-0.658821	-0.481665	-0.312798	-1.64288	-1.58067	-0.492157	-0.371262	-1.39468
17.59	-0.690993	-1.70452	-0.663947	-0.486686	-0.317727	-1.64854	-1.58633	-0.49719	-0.37621	-1.40022
17.6	-0.696136	-1.71021	-0.669074	-0.491707	-0.322656	-1.6542	-1.59199	-0.502222	-0.381158	-1.40576
17.61	-0.70128	-1.71591	-0.6742	-0.496729	-0.327585	-1.65986	-1.59765	-0.507254	-0.386105	-1.4113
17.62	-0.706423	-1.7216	-0.679326	-0.50175	-0.332514	-1.66551	-1.6033	-0.512286	-0.391053	-1.41685
17.63	-0.711567	-1.7273	-0.684452	-0.506771	-0.337443	-1.67117	-1.60896	-0.517319	-0.396	-1.42239
17.64	-0.71671	-1.73299	-0.689578	-0.511792	-0.342372	-1.67683	-1.61462	-0.522351	-0.400948	-1.42793
17.65	-0.721854	-1.73868	-0.694704	-0.516813	-0.347301	-1.68249	-1.62028	-0.527383	-0.405895	-1.43347
17.66	-0.726997	-1.74438	-0.69983	-0.521834	-0.35223	-1.68815	-1.62594	-0.532416	-0.410843	-1.43901
17.67	-0.732141	-1.75007	-0.704956	-0.526855	-0.357159	-1.6938	-1.6316	-0.537448	-0.415791	-1.44455
17.68	-0.737284	-1.75577	-0.710082	-0.531876	-0.362088	-1.69946	-1.63726	-0.54248	-0.420738	-1.4501
17.69	-0.742428	-1.76146	-0.715209	-0.536897	-0.367017	-1.70512	-1.64292	-0.547513	-0.425686	-1.45564
17.7	-0.747571	-1.76716	-0.720335	-0.541918	-0.371946	-1.71078	-1.64857	-0.552545	-0.430633	-1.46118
17.71	-0.752715	-1.77285	-0.725461	-0.546939	-0.376875	-1.71644	-1.65423	-0.557577	-0.435581	-1.46672
17.72	-0.757858	-1.77855	-0.730587	-0.55196	-0.381804	-1.72209	-1.65989	-0.562609	-0.440528	-1.47226
17.73	-0.763002	-1.78424	-0.735713	-0.556981	-0.386733	-1.72775	-1.66555	-0.567642	-0.445476	-1.4778
17.74	-0.768145	-1.78994	-0.740839	-0.562002	-0.391662	-1.73341	-1.67121	-0.572674	-0.450424	-1.48334
17.75	-0.773289	-1.79563	-0.745965	-0.567023	-0.396591	-1.73907	-1.67687	-0.577706	-0.455371	-1.48889
17.76	-0.778432	-1.80133	-0.751091	-0.572044	-0.40152	-1.74473	-1.68253	-0.582739	-0.460319	-1.49443
17.77	-0.783576	-1.80702	-0.756217	-0.577065	-0.406449	-1.75038	-1.68819	-0.587771	-0.465266	-1.49997
17.78	-0.788719	-1.81272	-0.761344	-0.582086	-0.411378	-1.75604	-1.69385	-0.592803	-0.470214	-1.50551
17.79	-0.793863	-1.81841	-0.76647	-0.587107	-0.416307	-1.7617	-1.6995	-0.597836	-0.475161	-1.51105
17.8	-0.799006	-1.82411	-0.771596	-0.592129	-0.421236	-1.76736	-1.70516	-0.602868	-0.480109	-1.51659
17.81	-0.80415	-1.8298	-0.776722	-0.59715	-0.426165	-1.77302	-1.71082	-0.6079	-0.485057	-1.52214
17.82	-0.809293	-1.83549	-0.781848	-0.602171	-0.431094	-1.77867	-1.71648	-0.612932	-0.490004	-1.52768
17.83	-0.814436	-1.84119	-0.786974	-0.607192	-0.436024	-1.78433	-1.72214	-0.617965	-0.494952	-1.53322
17.84	-0.81958	-1.84688	-0.7921	-0.612213	-0.440953	-1.78999	-1.7278	-0.622997	-0.499899	-1.53876
17.85	-0.824723	-1.85258	-0.797226	-0.617234	-0.445882	-1.79565	-1.73346	-0.628029	-0.504847	-1.5443
17.86	-0.829867	-1.85827	-0.802352	-0.622255	-0.450811	-1.80131	-1.73912	-0.633062	-0.509794	-1.54984
17.87	-0.83501	-1.86397	-0.807478	-0.627276	-0.45574	-1.80696	-1.74477	-0.638094	-0.514742	-1.55538
17.88	-0.840154	-1.86966	-0.812605	-0.632297	-0.460669	-1.81262	-1.75043	-0.643126	-0.519689	-1.56093
17.89	-0.845297	-1.87536	-0.817731	-0.637318	-0.465598	-1.81828	-1.75609	-0.648159	-0.524637	-1.56647
17.9	-0.850441	-1.88105	-0.822857	-0.642339	-0.470527	-1.82394	-1.76175	-0.653191	-0.529585	-1.57201
17.91	-0.855584	-1.88675	-0.827983	-0.64736	-0.475456	-1.8296	-1.76741	-0.658223	-0.534532	-1.57755
17.92	-0.860728	-1.89244	-0.833109	-0.652381	-0.480385	-1.83525	-1.77307	-0.663255	-0.53948	-1.58309
17.93	-0.865871	-1.89814	-0.838235	-0.657402	-0.485314	-1.84091	-1.77873	-0.668288	-0.544427	-1.58863
17.94	-0.871015	-1.90383	-0.843361	-0.662423	-0.490243	-1.84657	-1.78439	-0.67332	-0.549375	-1.59417
17.95	-0.876158	-1.90953	-0.848487	-0.667444	-0.495172	-1.85223	-1.79005	-0.678352	-0.554322	-1.59972
17.96	-0.881302	-1.91522	-0.853613	-0.672465	-0.500101	-1.85789	-1.7957	-0.683385	-0.55927	-1.60526
17.97	-0.886445	-1.92091	-0.85874	-0.677486	-0.50503	-1.86354	-1.80136	-0.688417	-0.564218	-1.6108
17.98	-0.891589	-1.92661	-0.863866	-0.682507	-0.509959	-1.8692	-1.80702	-0.693449	-0.569165	-1.61634
17.99	-0.896732	-1.9323	-0.868992	-0.687528	-0.514888	-1.87486	-1.81268	-0.698482	-0.574113	-1.62188
18	-0.901876	-1.938	-0.874118	-0.69255	-0.519817	-1.88052	-1.81834	-0.703514	-0.57906	-1.62742
18.01	-0.907019	-1.94369	-0.879244	-0.697571	-0.524746	-1.88618	-1.824	-0.708546	-0.584008	-1.63297
18.02	-0.912163	-1.94939	-0.88437	-0.702592	-0.529675	-1.89183	-1.82966	-0.713578	-0.588955	-1.63851
18.03	-0.917306	-1.95508	-0.889496	-0.707613	-0.534604	-1.89749	-1.83532	-0.718611	-0.593903	-1.64405
18.04	-0.92245	-1.96078	-0.894622	-0.712634	-0.539533	-1.90315	-1.84097	-0.723643	-0.598851	-1.64959
18.05	-0.927593	-1.96647	-0.899748	-0.717655	-0.544462	-1.90881	-1.84663	-0.728675	-0.603798	-1.65513
18.06	-0.932737	-1.97217	-0.904875	-0.722676	-0.549391	-1.91447	-1.85229	-0.733708	-0.608746	-1.66067
18.07	-0.93788	-1.97786	-0.910001	-0.727697	-0.55432	-1.92012	-1.85795	-0.73874	-0.613693	-1.66621
18.08	-0.943023	-1.98356	-0.915127	-0.732718	-0.559249	-1.92578	-1.86361	-0.743772	-0.618641	-1.67176
18.09	-0.948167	-1.98925	-0.920253	-0.737739	-0.564178	-1.93144	-1.86927	-0.748805	-0.623588	-1.6773
18.1	-0.95331	-1.99495	-0.925379	-0.74276	-0.569107	-1.9371	-1.87493	-0.753837	-0.628536	-1.68284
18.11	-0.958454	-2.00064	-0.930505	-0.747781	-0.574036	-1.94276	-1.88059	-0.758869	-0.633484	-1.68838
18.12	-0.963597	-2.00634	-0.935631	-0.752802	-0.578965	-1.94841	-1.88625	-0.763901	-0.638431	-1.69392
18.13	-0.968741	-2.01203	-0.940757	-0.757823	-0.583894	-1.95407	-1.8919	-0.768934	-0.643379	-1.69946
18.14	-0.973884	-2.01772	-0.945883	-0.762844	-0.588823	-1.95973	-1.89756	-0.773966	-0.648326	-1.70501
18.15	-0.979028	-2.02342	-0.95101	-0.767865	-0.593752	-1.96539	-1.90322	-0.778998	-0.653274	-1.71055
18.16	-0.984171	-2.02911	-0.956136	-0.772886	-0.598681	-1.97105	-1.90888	-0.784031	-0.658221	-1.71609
18.17	-0.989315	-2.03481	-0.961262	-0.777907	-0.60361	-1.9767	-1.91454	-0.789063	-0.663169	-1.72163
18.18	-0.994458	-2.0405	-0.966388	-0.782928	-0.608539	-1.98236	-1.9202	-0.794095	-0.668117	-1.72717
18.19	-0.999602	-2.0462	-0.971514	-0.78795	-0.613468	-1.98802	-1.92586	-0.799128	-0.673064	-1.73271
18.2	-1.00475	-2.05189	-0.97664	-0.792971	-0.618397	-1.99368	-1.93152	-0.80416	-0.678012	-1.73825
18.21	-1.00989	-2.05759	-0.981766	-0.797992	-0.623326	-1.99934	-1.93717	-0.809192	-0.682959	-1.7438
18.22	-1.01503	-2.06328	-0.986892	-0.803013	-0.628256	-2.005	-1.94283	-0.814224	-0.687907	-1.74934
18.23	-1.02018	-2.06898	-0.992018	-0.808034	-0.633185	-2.01065	-1.94849	-0.819257	-0.692854	-1.75488
18.24	-1.02532	-2.07467	-0.997144	-0.813055	-0.638114	-2.01631	-1.95415	-0.824289	-0.697802	-1.76042
18.25	-1.03046	-2.08037	-1.00227	-0.818076	-0.643043	-2.02197	-1.95981	-0.829321	-0.70275	-1.76596
18.26	-1.03561	-2.08606	-1.0074	-0.823097	-0.647972	-2.02763	-1.96547	-0.834354	-0.707697	-1.7715
18.27	-1.04075	-2.09176	-1.01252	-0.828118	-0.652901	-2.03329	-1.97113	-0.839386	-0.712645	-1.77704
18.28	-1.04589	-2.09745	-1.01765	-0.833139	-0.65783	-2.03894	-1.97679	-0.844418	-0.717592	-1.78259
18.29	-1.05104	-2.10314	-1.02278	-0.83816	-0.662759	-2.0446	-1.98244	-0.849451	-0.72254	-1.78813
18.3	-1.05618	-2.10884	-1.0279	-0.843181	-0.667688	-2.05026	-1.9881	-0.854483	-0.727487	-1.79367
18.31	-1.06132	-2.11453	-1.03303	-0.848202	-0.672617	-2.05592	-1.99376	-0.859515	-0.732435	-1.79921
18.32	-1.06647	-2.12023	-1.03815	-0.853223	-0.677546	-2.06158	-1.99942	-0.864547	-0.737383	-1.80475
18.33	-1.07161	-2.12592	-1.04328	-0.858244	-0.682475	-2.06723	-2.00508	-0.86958	-0.74233	-1.81029
18.34	-1.07675	-2.13162	-1.04841	-0.863265	-0.687404	-2.07289	-2.01074	-0.874612	-0.747278	-1.81584
18.35	-1.0819	-2.13731	-1.05353	-0.868286	-0.692333	-2.07855	-2.0164	-0.879644	-0.752225	-1.82138
18.36	-1.08704	-2.14301	-1.05866	-0.873307	-0.697262	-2.08421	-2.02206	-0.884677	-0.757173	-1.82692
18.37	-1.09218	-2.1487	-1.06378	-0.878328	-0.702191	-2.08987	-2.02772	-0.889709	-0.76212	-1.83246
18.38	-1.09733	-2.1544	-1.06891	-0.88335	-0.70712	-2.09552	-2.03337	-0.894741	-0.767068	-1.838
18.39	-1.10247	-2.16009	-1.07404	-0.888371	-0.712049	-2.10118	-2.03903	-0.899774	-0.772016	-1.84354
18.4	-1.10761	-2.16579	-1.07916	-0.893392	-0.716978	-2.10684	-2.04469	-0.904806	-0.776963	-1.84908
18.41	-1.11276	-2.17148	-1.08429	-0.898413	-0.721907	-2.1125	-2.05035	-0.909838	-0.781911	-1.85463
18.42	-1.1179	-2.17718	-1.08941	-0.903434	-0.726836	-2.11816	-2.05601	-0.91487	-0.786858	-1.86017
18.43	-1.12305	-2.18287	-1.09454	-0.908455	-0.731765	-2.12381	-2.06167	-0.919903	-0.791806	-1.86571
18.44	-1.12819	-2.18856	-1.09967	-0.913476	-0.736694	-2.12947	-2.06733	-0.924935	-0.796753	-1.87125
18.45	-1.13333	-2.19426	-1.10479	-0.918497	-0.741623	-2.13513	-2.07299	-0.929967	-0.801701	-1.87679
18.46	-1.13848	-2.19995	-1.10992	-0.923518	-0.746552	-2.14079	-2.07864	-0.935	-0.806649	-1.88233
18.47	-1.14362	-2.20565	-1.11504	-0.928539	-0.751481	-2.14645	-2.0843	-0.940032	-0.811596	-1.88787
18.48	-1.14876	-2.21134	-1.12017	-0.93356	-0.75641	-2.1521	-2.08996	-0.945064	-0.816544	-1.89342
18.49	-1.15391	-2.21704	-1.1253	-0.938581	-0.761339	-2.15776	-2.09562	-0.950097	-0.821491	-1.89896
18.5	-1.15905	-2.22273	-1.13042	-0.943602	-0.766268	-2.16342	-2.10128	-0.955129	-0.826439	-1.9045
18.51	-1.16419	-2.22843	-1.13555	-0.948623	-0.771197	-2.16908	-2.10694	-0.960161	-0.831386	-1.91004
18.52	-1.16934	-2.23412	-1.14068	-0.953644	-0.776126	-2.17474	-2.1126	-0.965193	-0.836334	-1.91558
18.53	-1.17448	-2.23982	-1.1458	-0.958665	-0.781055	-2.18039	-2.11826	-0.970226	-0.841282	-1.92112
18.54	-1.17962	-2.24551	-1.15093	-0.963686	-0.785984	-2.18605	-2.12392	-0.975258	-0.846229	-1.92667
18.55	-1.18477	-2.25121	-1.15605	-0.968707	-0.790913	-2.19171	-2.12957	-0.98029	-0.851177	-1.93221
18.56	-1.18991	-2.2569	-1.16118	-0.973728	-0.795842	-2.19737	-2.13523	-0.985323	-0.856124	-1.93775
18.57	-1.19505	-2.2626	-1.16631	-0.97875	-0.800771	-2.20303	-2.14089	-0.990355	-0.861072	-1.94329
18.58	-1.2002	-2.26829	-1.17143	-0.983771	-0.8057	-2.20868	-2.14655	-0.995387	-0.866019	-1.94883
18.59	-1.20534	-2.27399	-1.17656	-0.988792	-0.810629	-2.21434	-2.15221	-1.00042	-0.870967	-1.95437
18.6	-1.21048	-2.27968	-1.18168	-0.993813	-0.815558	-2.22	-2.15787	-1.00545	-0.875914	-1.95991
18.61	-1.21563	-2.28537	-1.18681	-0.998834	-0.820487	-2.22566	-2.16353	-1.01048	-0.880862	-1.96546
18.62	-1.22077	-2.29107	-1.19194	-1.00385	-0.825417	-2.23132	-2.16919	-1.01552	-0.88581	-1.971
18.63	-1.22591	-2.29676	-1.19706	-1.00888	-0.830346	-2.23697	-2.17484	-1.02055	-0.890757	-1.97654
18.64	-1.23106	-2.30246	-1.20219	-1.0139	-0.835275	-2.24263	-2.1805	-1.02558	-0.895705	-1.98208
18.65	-1.2362	-2.30815	-1.20731	-1.01892	-0.840204	-2.24829	-2.18616	-1.03061	-0.900652	-1.98762
18.66	-1.24135	-2.31385	-1.21244	-1.02394	-0.845133	-2.25395	-2.19182	-1.03565	-0.9056	-1.99316
18.67	-1.24649	-2.31954	-1.21757	-1.02896	-0.850062	-2.25961	-2.19748	-1.04068	-0.910547	-1.99871
18.68	-1.25163	-2.32524	-1.22269	-1.03398	-0.854991	-2.26526	-2.20314	-1.04571	-0.915495	-2.00425
18.69	-1.25678	-2.33093	-1.22782	-1.039	-0.85992	-2.27092	-2.2088	-1.05074	-0.920443	-2.00979
18.7	-1.26192	-2.33663	-1.23295	-1.04402	-0.864849	-2.27658	-2.21446	-1.05577	-0.92539	-2.01533
18.71	-1.26706	-2.34232	-1.23807	-1.04904	-0.869778	-2.28224	-2.22012	-1.06081	-0.930338	-2.02087
18.72	-1.27221	-2.34802	-1.2432	-1.05407	-0.874707	-2.2879	-2.22577	-1.06584	-0.935285	-2.02641
18.73	-1.27735	-2.35371	-1.24832	-1.05909	-0.879636	-2.29355	-2.23143	-1.07087	-0.940233	-2.03195
18.74	-1.28249	-2.35941	-1.25345	-1.06411	-0.884565	-2.29921	-2.23709	-1.0759	-0.94518	-2.0375
18.75	-1.28764	-2.3651	-1.25858	-1.06913	-0.889494	-2.30487	-2.24275	-1.08094	-0.950128	-2.04304
18.76	-1.29278	-2.37079	-1.2637	-1.07415	-0.894423	-2.31053	-2.24841	-1.08597	-0.955076	-2.04858
18.77	-1.29792	-2.37649	-1.26883	-1.07917	-0.899352	-2.31619	-2.25407	-1.091	-0.960023	-2.05412
18.78	-1.30307	-2.38218	-1.27395	-1.08419	-0.904281	-2.32184	-2.25973	-1.09603	-0.964971	-2.05966
18.79	-1.30821	-2.38788	-1.27908	-1.08921	-0.90921	-2.3275	-2.26539	-1.10107	-0.969918	-2.0652
18.8	-1.31335	-2.39357	-1.28421	-1.09423	-0.914139	-2.33316	-2.27104	-1.1061	-0.974866	-2.07074
18.81	-1.3185	-2.39927	-1.28933	-1.09925	-0.919068	-2.33882	-2.2767	-1.11113	-0.979813	-2.07629
18.82	-1.32364	-2.40496	-1.29446	-1.10428	-0.923997	-2.34448	-2.28236	-1.11616	-0.984761	-2.08183
18.83	-1.32878	-2.41066	-1.29958	-1.1093	-0.928926	-2.35013	-2.28802	-1.12119	-0.989709	-2.08737
18.84	-1.33393	-2.41635	-1.30471	-1.11432	-0.933855	-2.35579	-2.29368	-1.12623	-0.994656	-2.09291
18.85	-1.33907	-2.42205	-1.30984	-1.11934	-0.938784	-2.36145	-2.29934	-1.13126	-0.999604	-2.09845
18.86	-1.34421	-2.42774	-1.31496	-1.12436	-0.943713	-2.36711	-2.305	-1.13629	-1.00455	-2.10399
18.87	-1.34936	-2.43344	-1.32009	-1.12938	-0.948642	-2.37277	-2.31066	-1.14132	-1.0095	-2.10954
18.88	-1.3545	-2.43913	-1.32522	-1.1344	-0.953571	-2.37843	-2.31632	-1.14636	-1.01445	-2.11508
18.89	-1.35965	-2.44483	-1.33034	-1.13942	-0.9585	-2.38408	-2.32197	-1.15139	-1.01939	-2.12062
18.9	-1.36479	-2.45052	-1.33547	-1.14444	-0.963429	-2.38974	-2.32763	-1.15642	-1.02434	-2.12616
18.91	-1.36993	-2.45622	-1.34059	-1.14947	-0.968358	-2.3954	-2.33329	-1.16145	-1.02929	-2.1317
18.92	-1.37508	-2.46191	-1.34572	-1.15449	-0.973287	-2.40106	-2.33895	-1.16649	-1.03424	-2.13724
18.93	-1.38022	-2.4676	-1.35085	-1.15951	-0.978216	-2.40672	-2.34461	-1.17152	-1.03918	-2.14278
18.94	-1.38536	-2.4733	-1.35597	-1.16453	-0.983145	-2.41237	-2.35027	-1.17655	-1.04413	-2.14833
18.95	-1.39051	-2.47899	-1.3611	-1.16955	-0.988074	-2.41803	-2.35593	-1.18158	-1.04908	-2.15387
18.96	-1.39565	-2.48469	-1.36622	-1.17457	-0.993003	-2.42369	-2.36159	-1.18661	-1.05403	-2.15941
18.97	-1.40079	-2.49038	-1.37135	-1.17959	-0.997932	-2.42935	-2.36724	-1.19165	-1.05897	-2.16495
18.98	-1.40594	-2.49608	-1.37648	-1.18461	-1.00286	-2.43501	-2.3729	-1.19668	-1.06392	-2.17049
18.99	-1.41108	-2.50177	-1.3816	-1.18963	-1.00779	-2.44066	-2.37856	-1.20171	-1.06887	-2.17603
19	-1.41622	-2.50747	-1.38673	-1.19465	-1.01272	-2.44632	-2.38422	-1.20674	-1.07382	-2.18157
19.01	-1.42137	-2.51316	-1.39185	-1.19968	-1.01765	-2.45198	-2.38988	-1.21178	-1.07876	-2.18712
19.02	-1.42651	-2.51886	-1.39698	-1.2047	-1.02258	-2.45764	-2.39554	-1.21681	-1.08371	-2.19266
19.03	-1.43165	-2.52455	-1.40211	-1.20972	-1.02751	-2.4633	-2.4012	-1.22184	-1.08866	-2.1982
19.04	-1.4368	-2.53025	-1.40723	-1.21474	-1.03244	-2.46895	-2.40686	-1.22687	-1.09361	-2.20374
19.05	-1.44194	-2.53594	-1.41236	-1.21976	-1.03736	-2.47461	-2.41251	-1.23191	-1.09856	-2.20928
19.06	-1.44708	-2.54164	-1.41749	-1.22478	-1.04229	-2.48027	-2.41817	-1.23694	-1.1035	-2.21482
19.07	-1.45223	-2.54733	-1.42261	-1.2298	-1.04722	-2.48593	-2.42383	-1.24197	-1.10845	-2.22037
19.08	-1.45737	-2.55302	-1.42774	-1.23482	-1.05215	-2.49159	-2.42949	-1.247	-1.1134	-2.22591
19.09	-1.46251	-2.55872	-1.43286	-1.23984	-1.05708	-2.49724	-2.43515	-1.25203	-1.11835	-2.23145
19.1	-1.46766	-2.56441	-1.43799	-1.24487	-1.06201	-2.5029	-2.44081	-1.25707	-1.12329	-2.23699
19.11	-1.4728	-2.57011	-1.44312	-1.24989	-1.06694	-2.50856	-2.44647	-1.2621	-1.12824	-2.24253
19.12	-1.47795	-2.5758	-1.44824	-1.25491	-1.07187	-2.51422	-2.45213	-1.26713	-1.13319	-2.24807
19.13	-1.48309	-2.5815	-1.45337	-1.25993	-1.0768	-2.51988	-2.45779	-1.27216	-1.13814	-2.25361
19.14	-1.48823	-2.58719	-1.45849	-1.26495	-1.08173	-2.52553	-2.46344	-1.2772	-1.14308	-2.25916
19.15	-1.49338	-2.59289	-1.46362	-1.26997	-1.08665	-2.53119	-2.4691	-1.28223	-1.14803	-2.2647
19.16	-1.49852	-2.59858	-1.46875	-1.27499	-1.09158	-2.53685	-2.47476	-1.28726	-1.15298	-2.27024
19.17	-1.50366	-2.60428	-1.47387	-1.28001	-1.09651	-2.54251	-2.48042	-1.29229	-1.15793	-2.27578
19.18	-1.50881	-2.60997	-1.479	-1.28503	-1.10144	-2.54817	-2.48608	-1.29733	-1.16287	-2.28132
19.19	-1.51395	-2.61567	-1.48412	-1.29005	-1.10637	-2.55382	-2.49174	-1.30236	-1.16782	-2.28686
19.2	-1.51909	-2.62136	-1.48925	-1.29508	-1.1113	-2.55948	-2.4974	-1.30739	-1.17277	-2.29241
19.21	-1.52424	-2.62706	-1.49438	-1.3001	-1.11623	-2.56514	-2.50306	-1.31242	-1.17772	-2.29795
19.22	-1.52938	-2.63275	-1.4995	-1.30512	-1.12116	-2.5708	-2.50871	-1.31745	-1.18266	-2.30349
19.23	-1.53452	-2.63845	-1.50463	-1.31014	-1.12609	-2.57646	-2.51437	-1.32249	-1.18761	-2.30903
19.24	-1.53967	-2.64414	-1.50976	-1.31516	-1.13102	-2.58211	-2.52003	-1.32752	-1.19256	-2.31457
19.25	-1.54481	-2.64983	-1.51488	-1.32018	-1.13595	-2.58777	-2.52569	-1.33255	-1.19751	-2.32011
19.26	-1.54995	-2.65553	-1.52001	-1.3252	-1.14087	-2.59343	-2.53135	-1.33758	-1.20245	-2.32565
19.27	-1.5551	-2.66122	-1.52513	-1.33022	-1.1458	-2.59909	-2.53701	-1.34262	-1.2074	-2.3312
19.28	-1.56024	-2.66692	-1.53026	-1.33524	-1.15073	-2.60475	-2.54267	-1.34765	-1.21235	-2.33674
19.29	-1.56538	-2.67261	-1.53539	-1.34027	-1.15566	-2.6104	-2.54833	-1.35268	-1.2173	-2.34228
19.3	-1.57053	-2.67831	-1.54051	-1.34529	-1.16059	-2.61606	-2.55399	-1.35771	-1.22224	-2.34782
19.31	-1.57567	-2.684	-1.54564	-1.35031	-1.16552	-2.62172	-2.55964	-1.36275	-1.22719	-2.35336
19.32	-1.58081	-2.6897	-1.55076	-1.35533	-1.17045	-2.62738	-2.5653	-1.36778	-1.23214	-2.3589
19.33	-1.58596	-2.69539	-1.55589	-1.36035	-1.17538	-2.63304	-2.57096	-1.37281	-1.23709	-2.36444
19.34	-1.5911	-2.70109	-1.56102	-1.36537	-1.18031	-2.63869	-2.57662	-1.37784	-1.24203	-2.36999
19.35	-1.59625	-2.70678	-1.56614	-1.37039	-1.18524	-2.64435	-2.58228	-1.38287	-1.24698	-2.37553
19.36	-1.60139	-2.71248	-1.57127	-1.37541	-1.19016	-2.65001	-2.58794	-1.38791	-1.25193	-2.38107
19.37	-1.60653	-2.71817	-1.57639	-1.38043	-1.19509	-2.65567	-2.5936	-1.39294	-1.25688	-2.38661
19.38	-1.61168	-2.72387	-1.58152	-1.38545	-1.20002	-2.66133	-2.59926	-1.39797	-1.26182	-2.39215
19.39	-1.61682	-2.72956	-1.58665	-1.39048	-1.20495	-2.66698	-2.60491	-1.403	-1.26677	-2.39769
19.4	-1.62196	-2.73525	-1.59177	-1.3955	-1.20988	-2.67264	-2.61057	-1.40804	-1.27172	-2.40324
19.41	-1.62711	-2.74095	-1.5969	-1.40052	-1.21481	-2.6783	-2.61623	-1.41307	-1.27667	-2.40878
19.42	-1.63225	-2.74664	-1.60203	-1.40554	-1.21974	-2.68396	-2.62189	-1.4181	-1.28162	-2.41432
19.43	-1.63739	-2.75234	-1.60715	-1.41056	-1.22467	-2.68962	-2.62755	-1.42313	-1.28656	-2.41986
19.44	-1.64254	-2.75803	-1.61228	-1.41558	-1.2296	-2.69527	-2.63321	-1.42817	-1.29151	-2.4254
19.45	-1.64768	-2.76373	-1.6174	-1.4206	-1.23453	-2.70093	-2.63887	-1.4332	-1.29646	-2.43094
19.46	-1.65282	-2.76942	-1.62253	-1.42562	-1.23945	-2.70659	-2.64453	-1.43823	-1.30141	-2.43648
19.47	-1.65797	-2.77512	-1.62766	-1.43064	-1.24438	-2.71225	-2.65019	-1.44326	-1.30635	-2.44203
19.48	-1.66311	-2.78081	-1.63278	-1.43567	-1.24931	-2.71791	-2.65584	-1.44829	-1.3113	-2.44757
19.49	-1.66825	-2.78651	-1.63791	-1.44069	-1.25424	-2.72357	-2.6615	-1.45333	-1.31625	-2.45311
19.5	-1.6734	-2.7922	-1.64303	-1.44571	-1.25917	-2.72922	-2.66716	-1.45836	-1.3212	-2.45865
19.51	-1.67854	-2.7979	-1.64816	-1.45073	-1.2641	-2.73488	-2.67282	-1.46339	-1.32614	-2.46419
19.52	-1.68368	-2.80359	-1.65329	-1.45575	-1.26903	-2.74054	-2.67848	-1.46842	-1.33109	-2.46973
19.53	-1.68883	-2.80929	-1.65841	-1.46077	-1.27396	-2.7462	-2.68414	-1.47346	-1.33604	-2.47528
19.54	-1.69397	-2.81498	-1.66354	-1.46579	-1.27889	-2.75186	-2.6898	-1.47849	-1.34099	-2.48082
19.55	-1.69912	-2.82068	-1.66866	-1.47081	-1.28382	-2.75751	-2.69546	-1.48352	-1.34593	-2.48636
19.56	-1.70426	-2.82637	-1.67379	-1.47583	-1.28874	-2.76317	-2.70111	-1.48855	-1.35088	-2.4919
19.57	-1.7094	-2.83206	-1.67892	-1.48085	-1.29367	-2.76883	-2.70677	-1.49359	-1.35583	-2.49744
19.58	-1.71455	-2.83776	-1.68404	-1.48588	-1.2986	-2.77449	-2.71243	-1.49862	-1.36078	-2.50298
19.59	-1.71969	-2.84345	-1.68917	-1.4909	-1.30353	-2.78015	-2.71809	-1.50365	-1.36572	-2.50852
19.6	-1.72483	-2.84915	-1.6943	-1.49592	-1.30846	-2.7858	-2.72375	-1.50868	-1.37067	-2.51407
19.61	-1.72998	-2.85484	-1.69942	-1.50094	-1.31339	-2.79146	-2.72941	-1.51371	-1.37562	-2.51961
19.62	-1.73512	-2.86054	-1.70455	-1.50596	-1.31832	-2.79712	-2.73507	-1.51875	-1.38057	-2.52515
19.63	-1.74026	-2.86623	-1.70967	-1.51098	-1.32325	-2.80278	-2.74073	-1.52378	-1.38551	-2.53069
19.64	-1.74541	-2.87193	-1.7148	-1.516	-1.32818	-2.80844	-2.74638	-1.52881	-1.39046	-2.53623
19.65	-1.75055	-2.87762	-1.71993	-1.52102	-1.33311	-2.81409	-2.75204	-1.53384	-1.39541	-2.54177
19.66	-1.75569	-2.88332	-1.72505	-1.52604	-1.33804	-2.81975	-2.7577	-1.53888	-1.40036	-2.54731
19.67	-1.76084	-2.88901	-1.73018	-1.53107	-1.34296	-2.82541	-2.76336	-1.54391	-1.4053	-2.55286
19.68	-1.76598	-2.89471	-1.7353	-1.53609	-1.34789	-2.83107	-2.76902	-1.54894	-1.41025	-2.5584
19.69	-1.77112	-2.9004	-1.74043	-1.54111	-1.35282	-2.83673	-2.77468	-1.55397	-1.4152	-2.56394
19.7	-1.77627	-2.9061	-1.74556	-1.54613	-1.35775	-2.84238	-2.78034	-1.559	-1.42015	-2.56948
19.71	-1.78141	-2.91179	-1.75068	-1.55115	-1.36268	-2.84804	-2.786	-1.56404	-1.42509	-2.57502
19.72	-1.78655	-2.91748	-1.75581	-1.55617	-1.36761	-2.8537	-2.79166	-1.56907	-1.43004	-2.58056
19.73	-1.7917	-2.92318	-1.76093	-1.56119	-1.37254	-2.85936	-2.79731	-1.5741	-1.43499	-2.58611
19.74	-1.79684	-2.92887	-1.76606	-1.56621	-1.37747	-2.86502	-2.80297	-1.57913	-1.43994	-2.59165
19.75	-1.80198	-2.93457	-1.77119	-1.57123	-1.3824	-2.87067	-2.80863	-1.58417	-1.44489	-2.59719
19.76	-1.80713	-2.94026	-1.77631	-1.57625	-1.38733	-2.87633	-2.81429	-1.5892	-1.44983	-2.60273
19.77	-1.81227	-2.94596	-1.78144	-1.58128	-1.39225	-2.88199	-2.81995	-1.59423	-1.45478	-2.60827
19.78	-1.81742	-2.95165	-1.78657	-1.5863	-1.39718	-2.88765	-2.82561	-1.59926	-1.45973	-2.61381
19.79	-1.82256	-2.95735	-1.79169	-1.59132	-1.40211	-2.89331	-2.83127	-1.6043	-1.46468	-2.61935
19.8	-1.8277	-2.96304	-1.79682	-1.59634	-1.40704	-2.89896	-2.83693	-1.60933	-1.46962	-2.6249
19.81	-1.83285	-2.96874	-1.80194	-1.60136	-1.41197	-2.90462	-2.84258	-1.61436	-1.47457	-2.63044
19.82	-1.83799	-2.97443	-1.80707	-1.60638	-1.4169	-2.91028	-2.84824	-1.61939	-1.47952	-2.63598
19.83	-1.84313	-2.98013	-1.8122	-1.6114	-1.42183	-2.91594	-2.8539	-1.62442	-1.48447	-2.64152
19.84	-1.84828	-2.98582	-1.81732	-1.61642	-1.42676	-2.9216	-2.85956	-1.62946	-1.48941	-2.64706
19.85	-1.85342	-2.99152	-1.82245	-1.62144	-1.43169	-2.92725	-2.86522	-1.63449	-1.49436	-2.6526
19.86	-1.85856	-2.99721	-1.82757	-1.62647	-1.43662	-2.93291	-2.87088	-1.63952	-1.49931	-2.65814
19.87	-1.86371	-3.00291	-1.8327	-1.63149	-1.44154	-2.93857	-2.87654	-1.64455	-1.50426	-2.66369
19.88	-1.86885	-3.0086	-1.83783	-1.63651	-1.44647	-2.94423	-2.8822	-1.64959	-1.5092	-2.66923
19.89	-1.87399	-3.01429	-1.84295	-1.64153	-1.4514	-2.94989	-2.88786	-1.65462	-1.51415	-2.67477
19.9	-1.87914	-3.01999	-1.84808	-1.64655	-1.45633	-2.95554	-2.89351	-1.65965	-1.5191	-2.68031
19.91	-1.88428	-3.02568	-1.8532	-1.65157	-1.46126	-2.9612	-2.89917	-1.66468	-1.52405	-2.68585
19.92	-1.88942	-3.03138	-1.85833	-1.65659	-1.46619	-2.96686	-2.90483	-1.66972	-1.52899	-2.69139
19.93	-1.89457	-3.03707	-1.86346	-1.66161	-1.47112	-2.97252	-2.91049	-1.67475	-1.53394	-2.69694
19.94	-1.89971	-3.04277	-1.86858	-1.66663	-1.47605	-2.97818	-2.91615	-1.67978	-1.53889	-2.70248
19.95	-1.90485	-3.04846	-1.87371	-1.67165	-1.48098	-2.98383	-2.92181	-1.68481	-1.54384	-2.70802
19.96	-1.91	-3.05416	-1.87884	-1.67668	-1.48591	-2.98949	-2.92747	-1.68984	-1.54878	-2.71356
19.97	-1.91514	-3.05985	-1.88396	-1.6817	-1.49083	-2.99515	-2.93313	-1.69488	-1.55373	-2.7191
19.98	-1.92028	-3.06555	-1.88909	-1.68672	-1.49576	-3.00081	-2.93878	-1.69991	-1.55868	-2.72464
[truncated: 102 more rows]

## Sheet: FigS2 B
Time	Viral RNA load	Uninfected cell ratio
0	3.6684	1
0.01	3.63521	0.999979
0.02	3.62274	0.999958
0.03	3.62991	0.999938
0.04	3.65412	0.999917
0.05	3.69202	0.999895
0.06	3.74023	0.99987
0.07	3.79586	0.999842
0.08	3.85663	0.999809
0.09	3.92089	0.999772
0.1	3.98747	0.999729
0.11	4.05557	0.999679
0.12	4.12467	0.99962
0.13	4.19442	0.99955
0.14	4.26458	0.999469
0.15	4.33502	0.999373
0.16	4.40563	0.999261
0.17	4.47635	0.999128
0.18	4.54714	0.998973
0.19	4.61798	0.998789
0.2	4.68883	0.998573
0.21	4.7597	0.998319
0.22	4.83057	0.99802
0.23	4.90144	0.997669
0.24	4.9723	0.997255
0.25	5.04315	0.996767
0.26	5.11398	0.996194
0.27	5.1848	0.99552
0.28	5.25559	0.994727
0.29	5.32635	0.993794
0.3	5.39708	0.992697
0.31	5.46777	0.991408
0.32	5.53842	0.989894
0.33	5.60901	0.988115
0.34	5.67953	0.986026
0.35	5.74998	0.983575
0.36	5.82034	0.9807
0.37	5.89059	0.977331
0.38	5.96072	0.973386
0.39	6.03071	0.96877
0.4	6.10053	0.963376
0.41	6.17015	0.957081
0.42	6.23954	0.949747
0.43	6.30865	0.941215
0.44	6.37745	0.931313
0.45	6.44589	0.919849
0.46	6.51389	0.906614
0.47	6.5814	0.891385
0.48	6.64833	0.873931
0.49	6.71459	0.854015
0.5	6.78009	0.831407
0.51	6.8447	0.805897
0.52	6.90831	0.777306
0.53	6.97077	0.745512
0.54	7.03194	0.710464
0.55	7.09165	0.672214
0.56	7.14973	0.630932
0.57	7.20601	0.586927
0.58	7.26031	0.540658
0.59	7.31245	0.492735
0.6	7.36226	0.4439
0.61	7.40958	0.394998
0.62	7.45428	0.34693
0.63	7.49625	0.300591
0.64	7.5354	0.256816
0.65	7.57169	0.216305
0.66	7.60511	0.179591
0.67	7.63569	0.147004
0.68	7.66348	0.118669
0.69	7.68857	0.0945168
0.7	7.71109	0.0743223
0.71	7.73116	0.0577417
0.72	7.74894	0.044359
0.73	7.76458	0.0337277
0.74	7.77826	0.0254045
0.75	7.79014	0.0189742
0.76	7.80037	0.0140656
0.77	7.8091	0.0103583
0.78	7.81648	0.00758461
0.79	7.82263	0.0055266
0.8	7.82769	0.00401053
0.81	7.83176	0.00290053
0.82	7.83493	0.00209208
0.83	7.83731	0.00150581
0.84	7.83897	0.00108218
0.85	7.83998	0.000776941
0.86	7.84042	0.000557489
0.87	7.84033	0.000399971
0.88	7.83978	0.00028703
0.89	7.8388	0.000206102
0.9	7.83744	0.000148124
0.91	7.83573	0.000106579
0.92	7.83372	7.68e-05
0.93	7.83142	5.54e-05
0.94	7.82887	4.01e-05
0.95	7.82608	2.9e-05
0.96	7.82309	2.11e-05
0.97	7.81991	1.53e-05
0.98	7.81655	1.12e-05
0.99	7.81304	8.18e-06
1	7.80939	6e-06
1.01	7.8056	4.41e-06
1.02	7.8017	3.25e-06
1.03	7.7977	2.4e-06
1.04	7.79359	1.78e-06
1.05	7.78939	1.32e-06
1.06	7.78512	9.86e-07
1.07	7.78077	7.37e-07
1.08	7.77635	5.53e-07
1.09	7.77187	4.16e-07
1.1	7.76733	3.14e-07
1.11	7.76275	2.37e-07
1.12	7.75811	1.8e-07
1.13	7.75343	1.37e-07
1.14	7.74872	1.04e-07
1.15	7.74396	8e-08
1.16	7.73918	6.14e-08
1.17	7.73436	4.73e-08
1.18	7.72952	3.65e-08
1.19	7.72465	2.83e-08
1.2	7.71976	2.19e-08
1.21	7.71485	1.71e-08
1.22	7.70992	1.33e-08
1.23	7.70497	1.04e-08
1.24	7.70001	8.2e-09
1.25	7.69503	6.46e-09
1.26	7.69004	5.1e-09
1.27	7.68503	4.04e-09
1.28	7.68002	3.21e-09
1.29	7.67499	2.55e-09
1.3	7.66996	2.04e-09
1.31	7.66491	1.63e-09
1.32	7.65986	1.31e-09
1.33	7.6548	1.05e-09
1.34	7.64974	8.48e-10
1.35	7.64467	6.85e-10
1.36	7.63959	5.55e-10
1.37	7.63451	4.51e-10
1.38	7.62942	3.67e-10
1.39	7.62433	3e-10
1.4	7.61923	2.45e-10
1.41	7.61413	2.01e-10
1.42	7.60903	1.65e-10
1.43	7.60393	1.36e-10
1.44	7.59882	1.12e-10
1.45	7.59371	9.31e-11
1.46	7.5886	7.72e-11
1.47	7.58348	6.42e-11
1.48	7.57837	5.35e-11
1.49	7.57325	4.46e-11
1.5	7.56813	3.73e-11
1.51	7.56301	3.13e-11
1.52	7.55789	2.63e-11
1.53	7.55276	2.21e-11
1.54	7.54764	1.87e-11
1.55	7.54251	1.58e-11
1.56	7.53739	1.34e-11
1.57	7.53226	1.13e-11
1.58	7.52713	9.64e-12
1.59	7.522	8.21e-12
1.6	7.51687	7.01e-12
1.61	7.51174	5.99e-12
1.62	7.50661	5.13e-12
1.63	7.50148	4.4e-12
1.64	7.49635	3.78e-12
1.65	7.49121	3.26e-12
1.66	7.48608	2.81e-12
1.67	7.48095	2.43e-12
1.68	7.47582	2.1e-12
1.69	7.47068	1.82e-12
1.7	7.46555	1.58e-12
1.71	7.46041	1.38e-12
1.72	7.45528	1.2e-12
1.73	7.45014	1.05e-12
1.74	7.44501	9.16e-13
1.75	7.43987	8.02e-13
1.76	7.43474	7.04e-13
1.77	7.4296	6.18e-13
1.78	7.42447	5.44e-13
1.79	7.41933	4.79e-13
1.8	7.4142	4.23e-13
1.81	7.40906	3.74e-13
1.82	7.40392	3.31e-13
1.83	7.39879	2.93e-13
1.84	7.39365	2.6e-13
1.85	7.38852	2.31e-13
1.86	7.38338	2.06e-13
1.87	7.37824	1.83e-13
1.88	7.37311	1.63e-13
1.89	7.36797	1.46e-13
1.9	7.36283	1.31e-13
1.91	7.3577	1.17e-13
1.92	7.35256	1.05e-13
1.93	7.34743	9.43e-14
1.94	7.34229	8.48e-14
1.95	7.33715	7.64e-14
1.96	7.33202	6.89e-14
1.97	7.32688	6.22e-14
1.98	7.32174	5.62e-14
1.99	7.3166	5.08e-14
2	7.31147	4.61e-14
2.01	7.30633	4.18e-14
2.02	7.30119	3.79e-14
2.03	7.29606	3.45e-14
2.04	7.29092	3.14e-14
2.05	7.28578	2.86e-14
2.06	7.28065	2.61e-14
2.07	7.27551	2.38e-14
2.08	7.27037	2.18e-14
2.09	7.26524	1.99e-14
2.1	7.2601	1.82e-14
2.11	7.25496	1.67e-14
2.12	7.24983	1.53e-14
2.13	7.24469	1.41e-14
2.14	7.23955	1.3e-14
2.15	7.23442	1.19e-14
2.16	7.22928	1.1e-14
2.17	7.22414	1.01e-14
2.18	7.219	9.37e-15
2.19	7.21387	8.66e-15
2.2	7.20873	8.01e-15
2.21	7.20359	7.41e-15
2.22	7.19846	6.87e-15
2.23	7.19332	6.37e-15
2.24	7.18818	5.92e-15
2.25	7.18305	5.5e-15
2.26	7.17791	5.11e-15
2.27	7.17277	4.76e-15
2.28	7.16764	4.43e-15
2.29	7.1625	4.13e-15
2.3	7.15736	3.85e-15
2.31	7.15222	3.6e-15
2.32	7.14709	3.36e-15
2.33	7.14195	3.15e-15
2.34	7.13681	2.94e-15
2.35	7.13168	2.76e-15
2.36	7.12654	2.59e-15
2.37	7.1214	2.43e-15
2.38	7.11627	2.28e-15
2.39	7.11113	2.14e-15
2.4	7.10599	2.01e-15
2.41	7.10085	1.89e-15
2.42	7.09572	1.78e-15
2.43	7.09058	1.68e-15
2.44	7.08544	1.58e-15
2.45	7.08031	1.5e-15
2.46	7.07517	1.41e-15
2.47	7.07003	1.33e-15
2.48	7.0649	1.26e-15
2.49	7.05976	1.19e-15
2.5	7.05462	1.13e-15
2.51	7.04948	1.07e-15
2.52	7.04435	1.01e-15
2.53	7.03921	9.63e-16
2.54	7.03407	9.14e-16
2.55	7.02894	8.68e-16
2.56	7.0238	8.25e-16
2.57	7.01866	7.84e-16
2.58	7.01353	7.46e-16
2.59	7.00839	7.1e-16
2.6	7.00325	6.77e-16
2.61	6.99812	6.45e-16
2.62	6.99298	6.15e-16
2.63	6.98784	5.87e-16
2.64	6.9827	5.6e-16
2.65	6.97757	5.35e-16
2.66	6.97243	5.12e-16
2.67	6.96729	4.89e-16
2.68	6.96216	4.68e-16
2.69	6.95702	4.48e-16
2.7	6.95188	4.29e-16
2.71	6.94675	4.11e-16
2.72	6.94161	3.94e-16
2.73	6.93647	3.78e-16
2.74	6.93133	3.63e-16
2.75	6.9262	3.48e-16
2.76	6.92106	3.35e-16
2.77	6.91592	3.22e-16
2.78	6.91079	3.09e-16
2.79	6.90565	2.97e-16
2.8	6.90051	2.86e-16
2.81	6.89538	2.76e-16
2.82	6.89024	2.65e-16
2.83	6.8851	2.56e-16
2.84	6.87996	2.47e-16
2.85	6.87483	2.38e-16
2.86	6.86969	2.3e-16
2.87	6.86455	2.22e-16
2.88	6.85942	2.14e-16
2.89	6.85428	2.07e-16
2.9	6.84914	2e-16
2.91	6.84401	1.93e-16
2.92	6.83887	1.87e-16
2.93	6.83373	1.81e-16
2.94	6.8286	1.75e-16
2.95	6.82346	1.69e-16
2.96	6.81832	1.64e-16
2.97	6.81318	1.59e-16
2.98	6.80805	1.54e-16
2.99	6.80291	1.5e-16
3	6.79777	1.45e-16
3.01	6.79264	1.41e-16
3.02	6.7875	1.37e-16
3.03	6.78236	1.33e-16
3.04	6.77723	1.29e-16
3.05	6.77209	1.25e-16
3.06	6.76695	1.22e-16
3.07	6.76181	1.19e-16
3.08	6.75668	1.15e-16
3.09	6.75154	1.12e-16
3.1	6.7464	1.09e-16
3.11	6.74127	1.06e-16
3.12	6.73613	1.04e-16
3.13	6.73099	1.01e-16
3.14	6.72586	9.84e-17
3.15	6.72072	9.6e-17
3.16	6.71558	9.36e-17
3.17	6.71044	9.13e-17
3.18	6.70531	8.91e-17
3.19	6.70017	8.7e-17
3.2	6.69503	8.49e-17
3.21	6.6899	8.29e-17
3.22	6.68476	8.1e-17
3.23	6.67962	7.92e-17
3.24	6.67449	7.74e-17
3.25	6.66935	7.57e-17
3.26	6.66421	7.4e-17
3.27	6.65908	7.24e-17
3.28	6.65394	7.08e-17
3.29	6.6488	6.93e-17
3.3	6.64366	6.79e-17
3.31	6.63853	6.65e-17
3.32	6.63339	6.51e-17
3.33	6.62825	6.38e-17
3.34	6.62312	6.25e-17
3.35	6.61798	6.13e-17
3.36	6.61284	6.01e-17
3.37	6.60771	5.89e-17
3.38	6.60257	5.78e-17
3.39	6.59743	5.67e-17
3.4	6.59229	5.56e-17
3.41	6.58716	5.46e-17
3.42	6.58202	5.36e-17
3.43	6.57688	5.26e-17
3.44	6.57175	5.17e-17
3.45	6.56661	5.08e-17
3.46	6.56147	4.99e-17
3.47	6.55634	4.9e-17
3.48	6.5512	4.82e-17
3.49	6.54606	4.74e-17
3.5	6.54092	4.66e-17
3.51	6.53579	4.58e-17
3.52	6.53065	4.51e-17
3.53	6.52551	4.44e-17
3.54	6.52038	4.37e-17
3.55	6.51524	4.3e-17
3.56	6.5101	4.23e-17
3.57	6.50497	4.17e-17
3.58	6.49983	4.1e-17
3.59	6.49469	4.04e-17
3.6	6.48956	3.98e-17
3.61	6.48442	3.92e-17
3.62	6.47928	3.87e-17
3.63	6.47414	3.81e-17
3.64	6.46901	3.76e-17
3.65	6.46387	3.71e-17
3.66	6.45873	3.65e-17
3.67	6.4536	3.61e-17
3.68	6.44846	3.56e-17
3.69	6.44332	3.51e-17
3.7	6.43819	3.46e-17
3.71	6.43305	3.42e-17
3.72	6.42791	3.37e-17
3.73	6.42277	3.33e-17
3.74	6.41764	3.29e-17
3.75	6.4125	3.25e-17
3.76	6.40736	3.21e-17
3.77	6.40223	3.17e-17
3.78	6.39709	3.13e-17
3.79	6.39195	3.1e-17
3.8	6.38682	3.06e-17
3.81	6.38168	3.02e-17
3.82	6.37654	2.99e-17
3.83	6.3714	2.96e-17
3.84	6.36627	2.92e-17
3.85	6.36113	2.89e-17
3.86	6.35599	2.86e-17
3.87	6.35086	2.83e-17
3.88	6.34572	2.8e-17
3.89	6.34058	2.77e-17
3.9	6.33545	2.74e-17
3.91	6.33031	2.71e-17
3.92	6.32517	2.68e-17
3.93	6.32004	2.66e-17
3.94	6.3149	2.63e-17
3.95	6.30976	2.61e-17
3.96	6.30462	2.58e-17
3.97	6.29949	2.56e-17
3.98	6.29435	2.53e-17
3.99	6.28921	2.51e-17
4	6.28408	2.48e-17
4.01	6.27894	2.46e-17
4.02	6.2738	2.44e-17
4.03	6.26867	2.42e-17
4.04	6.26353	2.4e-17
4.05	6.25839	2.38e-17
4.06	6.25325	2.36e-17
4.07	6.24812	2.34e-17
4.08	6.24298	2.32e-17
4.09	6.23784	2.3e-17
4.1	6.23271	2.28e-17
4.11	6.22757	2.26e-17
4.12	6.22243	2.24e-17
4.13	6.2173	2.22e-17
4.14	6.21216	2.21e-17
4.15	6.20702	2.19e-17
4.16	6.20188	2.17e-17
4.17	6.19675	2.16e-17
4.18	6.19161	2.14e-17
4.19	6.18647	2.12e-17
4.2	6.18134	2.11e-17
4.21	6.1762	2.09e-17
4.22	6.17106	2.08e-17
4.23	6.16593	2.06e-17
4.24	6.16079	2.05e-17
4.25	6.15565	2.03e-17
4.26	6.15051	2.02e-17
4.27	6.14538	2.01e-17
4.28	6.14024	1.99e-17
4.29	6.1351	1.98e-17
4.3	6.12997	1.97e-17
4.31	6.12483	1.96e-17
4.32	6.11969	1.94e-17
4.33	6.11456	1.93e-17
4.34	6.10942	1.92e-17
4.35	6.10428	1.91e-17
4.36	6.09915	1.9e-17
4.37	6.09401	1.88e-17
4.38	6.08887	1.87e-17
4.39	6.08373	1.86e-17
4.4	6.0786	1.85e-17
4.41	6.07346	1.84e-17
4.42	6.06832	1.83e-17
4.43	6.06319	1.82e-17
4.44	6.05805	1.81e-17
4.45	6.05291	1.8e-17
4.46	6.04778	1.79e-17
4.47	6.04264	1.78e-17
4.48	6.0375	1.77e-17
4.49	6.03236	1.76e-17
4.5	6.02723	1.75e-17
4.51	6.02209	1.75e-17
4.52	6.01695	1.74e-17
4.53	6.01182	1.73e-17
4.54	6.00668	1.72e-17
4.55	6.00154	1.71e-17
4.56	5.99641	1.7e-17
4.57	5.99127	1.69e-17
4.58	5.98613	1.69e-17
4.59	5.98099	1.68e-17
4.6	5.97586	1.67e-17
4.61	5.97072	1.66e-17
4.62	5.96558	1.66e-17
4.63	5.96045	1.65e-17
4.64	5.95531	1.64e-17
4.65	5.95017	1.64e-17
4.66	5.94504	1.63e-17
4.67	5.9399	1.62e-17
4.68	5.93476	1.61e-17
4.69	5.92963	1.61e-17
4.7	5.92449	1.6e-17
4.71	5.91935	1.6e-17
4.72	5.91421	1.59e-17
4.73	5.90908	1.58e-17
4.74	5.90394	1.58e-17
4.75	5.8988	1.57e-17
4.76	5.89367	1.56e-17
4.77	5.88853	1.56e-17
4.78	5.88339	1.55e-17
4.79	5.87826	1.55e-17
4.8	5.87312	1.54e-17
4.81	5.86798	1.54e-17
4.82	5.86284	1.53e-17
4.83	5.85771	1.53e-17
4.84	5.85257	1.52e-17
4.85	5.84743	1.52e-17
4.86	5.8423	1.51e-17
4.87	5.83716	1.51e-17
4.88	5.83202	1.5e-17
4.89	5.82689	1.5e-17
4.9	5.82175	1.49e-17
4.91	5.81661	1.49e-17
4.92	5.81147	1.48e-17
4.93	5.80634	1.48e-17
4.94	5.8012	1.47e-17
4.95	5.79606	1.47e-17
4.96	5.79093	1.46e-17
4.97	5.78579	1.46e-17
4.98	5.78065	1.45e-17
4.99	5.77552	1.45e-17
5	5.77038	1.45e-17
5.01	5.76524	1.44e-17
5.02	5.76011	1.44e-17
5.03	5.75497	1.43e-17
5.04	5.74983	1.43e-17
5.05	5.74469	1.43e-17
5.06	5.73956	1.42e-17
5.07	5.73442	1.42e-17
5.08	5.72928	1.42e-17
5.09	5.72415	1.41e-17
5.1	5.71901	1.41e-17
5.11	5.71387	1.41e-17
5.12	5.70874	1.4e-17
5.13	5.7036	1.4e-17
5.14	5.69846	1.39e-17
5.15	5.69332	1.39e-17
5.16	5.68819	1.39e-17
5.17	5.68305	1.39e-17
5.18	5.67791	1.38e-17
5.19	5.67278	1.38e-17
5.2	5.66764	1.38e-17
5.21	5.6625	1.37e-17
5.22	5.65737	1.37e-17
5.23	5.65223	1.37e-17
5.24	5.64709	1.36e-17
5.25	5.64195	1.36e-17
5.26	5.63682	1.36e-17
5.27	5.63168	1.36e-17
5.28	5.62654	1.35e-17
5.29	5.62141	1.35e-17
5.3	5.61627	1.35e-17
5.31	5.61113	1.34e-17
5.32	5.606	1.34e-17
5.33	5.60086	1.34e-17
5.34	5.59572	1.34e-17
5.35	5.59059	1.33e-17
5.36	5.58545	1.33e-17
5.37	5.58031	1.33e-17
5.38	5.57517	1.33e-17
5.39	5.57004	1.32e-17
5.4	5.5649	1.32e-17
5.41	5.55976	1.32e-17
5.42	5.55463	1.32e-17
5.43	5.54949	1.32e-17
5.44	5.54435	1.31e-17
5.45	5.53922	1.31e-17
5.46	5.53408	1.31e-17
5.47	5.52894	1.31e-17
5.48	5.5238	1.3e-17
5.49	5.51867	1.3e-17
5.5	5.51353	1.3e-17
5.51	5.50839	1.3e-17
5.52	5.50326	1.3e-17
5.53	5.49812	1.29e-17
5.54	5.49298	1.29e-17
5.55	5.48785	1.29e-17
5.56	5.48271	1.29e-17
5.57	5.47757	1.29e-17
5.58	5.47243	1.28e-17
5.59	5.4673	1.28e-17
5.6	5.46216	1.28e-17
5.61	5.45702	1.28e-17
5.62	5.45189	1.28e-17
5.63	5.44675	1.28e-17
5.64	5.44161	1.27e-17
5.65	5.43648	1.27e-17
5.66	5.43134	1.27e-17
5.67	5.4262	1.27e-17
5.68	5.42107	1.27e-17
5.69	5.41593	1.27e-17
5.7	5.41079	1.26e-17
5.71	5.40565	1.26e-17
5.72	5.40052	1.26e-17
5.73	5.39538	1.26e-17
5.74	5.39024	1.26e-17
5.75	5.38511	1.26e-17
5.76	5.37997	1.26e-17
5.77	5.37483	1.25e-17
5.78	5.3697	1.25e-17
5.79	5.36456	1.25e-17
5.8	5.35942	1.25e-17
5.81	5.35428	1.25e-17
5.82	5.34915	1.25e-17
5.83	5.34401	1.25e-17
5.84	5.33887	1.24e-17
5.85	5.33374	1.24e-17
5.86	5.3286	1.24e-17
5.87	5.32346	1.24e-17
5.88	5.31833	1.24e-17
5.89	5.31319	1.24e-17
5.9	5.30805	1.24e-17
5.91	5.30291	1.24e-17
5.92	5.29778	1.23e-17
5.93	5.29264	1.23e-17
5.94	5.2875	1.23e-17
5.95	5.28237	1.23e-17
5.96	5.27723	1.23e-17
5.97	5.27209	1.23e-17
5.98	5.26696	1.23e-17
5.99	5.26182	1.23e-17
6	5.25668	1.23e-17
6.01	5.25154	1.22e-17
6.02	5.24641	1.22e-17
6.03	5.24127	1.22e-17
6.04	5.23613	1.22e-17
6.05	5.231	1.22e-17
6.06	5.22586	1.22e-17
6.07	5.22072	1.22e-17
6.08	5.21559	1.22e-17
6.09	5.21045	1.22e-17
6.1	5.20531	1.22e-17
6.11	5.20018	1.21e-17
6.12	5.19504	1.21e-17
6.13	5.1899	1.21e-17
6.14	5.18476	1.21e-17
6.15	5.17963	1.21e-17
6.16	5.17449	1.21e-17
6.17	5.16935	1.21e-17
6.18	5.16422	1.21e-17
6.19	5.15908	1.21e-17
6.2	5.15394	1.21e-17
6.21	5.14881	1.21e-17
6.22	5.14367	1.21e-17
6.23	5.13853	1.2e-17
6.24	5.13339	1.2e-17
6.25	5.12826	1.2e-17
6.26	5.12312	1.2e-17
6.27	5.11798	1.2e-17
6.28	5.11285	1.2e-17
6.29	5.10771	1.2e-17
6.3	5.10257	1.2e-17
6.31	5.09744	1.2e-17
6.32	5.0923	1.2e-17
6.33	5.08716	1.2e-17
6.34	5.08202	1.2e-17
6.35	5.07689	1.2e-17
6.36	5.07175	1.2e-17
6.37	5.06661	1.19e-17
6.38	5.06148	1.19e-17
6.39	5.05634	1.19e-17
6.4	5.0512	1.19e-17
6.41	5.04607	1.19e-17
6.42	5.04093	1.19e-17
6.43	5.03579	1.19e-17
6.44	5.03066	1.19e-17
6.45	5.02552	1.19e-17
6.46	5.02038	1.19e-17
6.47	5.01524	1.19e-17
6.48	5.01011	1.19e-17
6.49	5.00497	1.19e-17
6.5	4.99983	1.19e-17
6.51	4.9947	1.19e-17
6.52	4.98956	1.19e-17
6.53	4.98442	1.18e-17
6.54	4.97929	1.18e-17
6.55	4.97415	1.18e-17
6.56	4.96901	1.18e-17
6.57	4.96387	1.18e-17
6.58	4.95874	1.18e-17
6.59	4.9536	1.18e-17
6.6	4.94846	1.18e-17
6.61	4.94333	1.18e-17
6.62	4.93819	1.18e-17
6.63	4.93305	1.18e-17
6.64	4.92792	1.18e-17
6.65	4.92278	1.18e-17
6.66	4.91764	1.18e-17
6.67	4.9125	1.18e-17
6.68	4.90737	1.18e-17
6.69	4.90223	1.18e-17
6.7	4.89709	1.18e-17
6.71	4.89196	1.18e-17
6.72	4.88682	1.18e-17
6.73	4.88168	1.17e-17
6.74	4.87655	1.17e-17
6.75	4.87141	1.17e-17
6.76	4.86627	1.17e-17
6.77	4.86114	1.17e-17
6.78	4.856	1.17e-17
6.79	4.85086	1.17e-17
6.8	4.84572	1.17e-17
6.81	4.84059	1.17e-17
6.82	4.83545	1.17e-17
6.83	4.83031	1.17e-17
6.84	4.82518	1.17e-17
6.85	4.82004	1.17e-17
6.86	4.8149	1.17e-17
6.87	4.80977	1.17e-17
6.88	4.80463	1.17e-17
6.89	4.79949	1.17e-17
6.9	4.79435	1.17e-17
6.91	4.78922	1.17e-17
6.92	4.78408	1.17e-17
6.93	4.77894	1.17e-17
6.94	4.77381	1.17e-17
6.95	4.76867	1.17e-17
6.96	4.76353	1.17e-17
6.97	4.7584	1.17e-17
6.98	4.75326	1.17e-17
6.99	4.74812	1.17e-17
7	4.74298	1.17e-17
7.01	4.73785	1.16e-17
7.02	4.73271	1.16e-17
7.03	4.72757	1.16e-17
7.04	4.72244	1.16e-17
7.05	4.7173	1.16e-17
7.06	4.71216	1.16e-17
7.07	4.70703	1.16e-17
7.08	4.70189	1.16e-17
7.09	4.69675	1.16e-17
7.1	4.69162	1.16e-17
7.11	4.68648	1.16e-17
7.12	4.68134	1.16e-17
7.13	4.6762	1.16e-17
7.14	4.67107	1.16e-17
7.15	4.66593	1.16e-17
7.16	4.66079	1.16e-17
7.17	4.65566	1.16e-17
7.18	4.65052	1.16e-17
7.19	4.64538	1.16e-17
7.2	4.64025	1.16e-17
7.21	4.63511	1.16e-17
7.22	4.62997	1.16e-17
7.23	4.62483	1.16e-17
7.24	4.6197	1.16e-17
7.25	4.61456	1.16e-17
7.26	4.60942	1.16e-17
7.27	4.60429	1.16e-17
7.28	4.59915	1.16e-17
7.29	4.59401	1.16e-17
7.3	4.58888	1.16e-17
7.31	4.58374	1.16e-17
7.32	4.5786	1.16e-17
7.33	4.57346	1.16e-17
7.34	4.56833	1.16e-17
7.35	4.56319	1.16e-17
7.36	4.55805	1.16e-17
7.37	4.55292	1.16e-17
7.38	4.54778	1.16e-17
7.39	4.54264	1.16e-17
7.4	4.53751	1.16e-17
7.41	4.53237	1.16e-17
7.42	4.52723	1.15e-17
7.43	4.52209	1.15e-17
7.44	4.51696	1.15e-17
7.45	4.51182	1.15e-17
7.46	4.50668	1.15e-17
7.47	4.50155	1.15e-17
7.48	4.49641	1.15e-17
7.49	4.49127	1.15e-17
7.5	4.48614	1.15e-17
7.51	4.481	1.15e-17
7.52	4.47586	1.15e-17
7.53	4.47073	1.15e-17
7.54	4.46559	1.15e-17
7.55	4.46045	1.15e-17
7.56	4.45531	1.15e-17
7.57	4.45018	1.15e-17
7.58	4.44504	1.15e-17
7.59	4.4399	1.15e-17
7.6	4.43477	1.15e-17
7.61	4.42963	1.15e-17
7.62	4.42449	1.15e-17
7.63	4.41936	1.15e-17
7.64	4.41422	1.15e-17
7.65	4.40908	1.15e-17
7.66	4.40394	1.15e-17
7.67	4.39881	1.15e-17
7.68	4.39367	1.15e-17
7.69	4.38853	1.15e-17
7.7	4.3834	1.15e-17
7.71	4.37826	1.15e-17
7.72	4.37312	1.15e-17
7.73	4.36799	1.15e-17
7.74	4.36285	1.15e-17
7.75	4.35771	1.15e-17
7.76	4.35257	1.15e-17
7.77	4.34744	1.15e-17
7.78	4.3423	1.15e-17
7.79	4.33716	1.15e-17
7.8	4.33203	1.15e-17
7.81	4.32689	1.15e-17
7.82	4.32175	1.15e-17
7.83	4.31662	1.15e-17
7.84	4.31148	1.15e-17
7.85	4.30634	1.15e-17
7.86	4.30121	1.15e-17
7.87	4.29607	1.15e-17
7.88	4.29093	1.15e-17
7.89	4.28579	1.15e-17
7.9	4.28066	1.15e-17
7.91	4.27552	1.15e-17
7.92	4.27038	1.15e-17
7.93	4.26525	1.15e-17
7.94	4.26011	1.15e-17
7.95	4.25497	1.15e-17
7.96	4.24984	1.15e-17
7.97	4.2447	1.15e-17
7.98	4.23956	1.15e-17
7.99	4.23442	1.15e-17
8	4.22929	1.15e-17
8.01	4.22415	1.15e-17
8.02	4.21901	1.15e-17
8.03	4.21388	1.15e-17
8.04	4.20874	1.15e-17
8.05	4.2036	1.15e-17
8.06	4.19847	1.15e-17
8.07	4.19333	1.15e-17
8.08	4.18819	1.15e-17
8.09	4.18305	1.15e-17
8.1	4.17792	1.15e-17
8.11	4.17278	1.15e-17
8.12	4.16764	1.15e-17
8.13	4.16251	1.15e-17
8.14	4.15737	1.15e-17
8.15	4.15223	1.15e-17
8.16	4.1471	1.15e-17
8.17	4.14196	1.15e-17
8.18	4.13682	1.15e-17
8.19	4.13169	1.15e-17
8.2	4.12655	1.15e-17
8.21	4.12141	1.15e-17
8.22	4.11627	1.15e-17
8.23	4.11114	1.15e-17
8.24	4.106	1.15e-17
8.25	4.10086	1.15e-17
8.26	4.09573	1.15e-17
8.27	4.09059	1.14e-17
8.28	4.08545	1.14e-17
8.29	4.08032	1.14e-17
8.3	4.07518	1.14e-17
8.31	4.07004	1.14e-17
8.32	4.0649	1.14e-17
8.33	4.05977	1.14e-17
8.34	4.05463	1.14e-17
8.35	4.04949	1.14e-17
8.36	4.04436	1.14e-17
8.37	4.03922	1.14e-17
8.38	4.03408	1.14e-17
8.39	4.02895	1.14e-17
8.4	4.02381	1.14e-17
8.41	4.01867	1.14e-17
8.42	4.01353	1.14e-17
8.43	4.0084	1.14e-17
8.44	4.00326	1.14e-17
8.45	3.99812	1.14e-17
8.46	3.99299	1.14e-17
8.47	3.98785	1.14e-17
8.48	3.98271	1.14e-17
8.49	3.97758	1.14e-17
8.5	3.97244	1.14e-17
8.51	3.9673	1.14e-17
8.52	3.96217	1.14e-17
8.53	3.95703	1.14e-17
8.54	3.95189	1.14e-17
8.55	3.94675	1.14e-17
8.56	3.94162	1.14e-17
8.57	3.93648	1.14e-17
8.58	3.93134	1.14e-17
8.59	3.92621	1.14e-17
8.6	3.92107	1.14e-17
8.61	3.91593	1.14e-17
8.62	3.9108	1.14e-17
8.63	3.90566	1.14e-17
8.64	3.90052	1.14e-17
8.65	3.89538	1.14e-17
8.66	3.89025	1.14e-17
8.67	3.88511	1.14e-17
8.68	3.87997	1.14e-17
8.69	3.87484	1.14e-17
8.7	3.8697	1.14e-17
8.71	3.86456	1.14e-17
8.72	3.85943	1.14e-17
8.73	3.85429	1.14e-17
8.74	3.84915	1.14e-17
8.75	3.84401	1.14e-17
8.76	3.83888	1.14e-17
8.77	3.83374	1.14e-17
8.78	3.8286	1.14e-17
8.79	3.82347	1.14e-17
8.8	3.81833	1.14e-17
8.81	3.81319	1.14e-17
8.82	3.80806	1.14e-17
8.83	3.80292	1.14e-17
8.84	3.79778	1.14e-17
8.85	3.79265	1.14e-17
8.86	3.78751	1.14e-17
8.87	3.78237	1.14e-17
8.88	3.77723	1.14e-17
8.89	3.7721	1.14e-17
8.9	3.76696	1.14e-17
8.91	3.76182	1.14e-17
8.92	3.75669	1.14e-17
8.93	3.75155	1.14e-17
8.94	3.74641	1.14e-17
8.95	3.74128	1.14e-17
8.96	3.73614	1.14e-17
8.97	3.731	1.14e-17
8.98	3.72586	1.14e-17
8.99	3.72073	1.14e-17
9	3.71559	1.14e-17
9.01	3.71045	1.14e-17
9.02	3.70532	1.14e-17
9.03	3.70018	1.14e-17
9.04	3.69504	1.14e-17
9.05	3.68991	1.14e-17
9.06	3.68477	1.14e-17
9.07	3.67963	1.14e-17
9.08	3.67449	1.14e-17
9.09	3.66936	1.14e-17
9.1	3.66422	1.14e-17
9.11	3.65908	1.14e-17
9.12	3.65395	1.14e-17
9.13	3.64881	1.14e-17
9.14	3.64367	1.14e-17
9.15	3.63854	1.14e-17
9.16	3.6334	1.14e-17
9.17	3.62826	1.14e-17
9.18	3.62312	1.14e-17
9.19	3.61799	1.14e-17
9.2	3.61285	1.14e-17
9.21	3.60771	1.14e-17
9.22	3.60258	1.14e-17
9.23	3.59744	1.14e-17
9.24	3.5923	1.14e-17
9.25	3.58717	1.14e-17
9.26	3.58203	1.14e-17
9.27	3.57689	1.14e-17
9.28	3.57176	1.14e-17
9.29	3.56662	1.14e-17
9.3	3.56148	1.14e-17
9.31	3.55634	1.14e-17
9.32	3.55121	1.14e-17
9.33	3.54607	1.14e-17
9.34	3.54093	1.14e-17
9.35	3.5358	1.14e-17
9.36	3.53066	1.14e-17
9.37	3.52552	1.14e-17
9.38	3.52039	1.14e-17
9.39	3.51525	1.14e-17
9.4	3.51011	1.14e-17
9.41	3.50497	1.14e-17
9.42	3.49984	1.14e-17
9.43	3.4947	1.14e-17
9.44	3.48956	1.14e-17
9.45	3.48443	1.14e-17
9.46	3.47929	1.14e-17
9.47	3.47415	1.14e-17
9.48	3.46902	1.14e-17
9.49	3.46388	1.14e-17
9.5	3.45874	1.14e-17
9.51	3.4536	1.14e-17
9.52	3.44847	1.14e-17
9.53	3.44333	1.14e-17
9.54	3.43819	1.14e-17
9.55	3.43306	1.14e-17
9.56	3.42792	1.14e-17
9.57	3.42278	1.14e-17
9.58	3.41765	1.14e-17
9.59	3.41251	1.14e-17
9.6	3.40737	1.14e-17
9.61	3.40224	1.14e-17
9.62	3.3971	1.14e-17
9.63	3.39196	1.14e-17
9.64	3.38682	1.14e-17
9.65	3.38169	1.14e-17
9.66	3.37655	1.14e-17
9.67	3.37141	1.14e-17
9.68	3.36628	1.14e-17
9.69	3.36114	1.14e-17
9.7	3.356	1.14e-17
9.71	3.35087	1.14e-17
9.72	3.34573	1.14e-17
9.73	3.34059	1.14e-17
9.74	3.33545	1.14e-17
9.75	3.33032	1.14e-17
9.76	3.32518	1.14e-17
9.77	3.32004	1.14e-17
9.78	3.31491	1.14e-17
9.79	3.30977	1.14e-17
9.8	3.30463	1.14e-17
9.81	3.2995	1.14e-17
9.82	3.29436	1.14e-17
9.83	3.28922	1.14e-17
9.84	3.28408	1.14e-17
9.85	3.27895	1.14e-17
9.86	3.27381	1.14e-17
9.87	3.26867	1.14e-17
9.88	3.26354	1.14e-17
9.89	3.2584	1.14e-17
9.9	3.25326	1.14e-17
9.91	3.24813	1.14e-17
9.92	3.24299	1.14e-17
9.93	3.23785	1.14e-17
9.94	3.23272	1.14e-17
9.95	3.22758	1.14e-17
9.96	3.22244	1.14e-17
9.97	3.2173	1.14e-17
9.98	3.21217	1.14e-17
9.99	3.20703	1.14e-17
10	3.20189	1.14e-17
10.01	3.19676	1.14e-17
10.02	3.19162	1.14e-17
10.03	3.18648	1.14e-17
10.04	3.18135	1.14e-17
10.05	3.17621	1.14e-17
10.06	3.17107	1.14e-17
10.07	3.16593	1.14e-17
10.08	3.1608	1.14e-17
10.09	3.15566	1.14e-17
10.1	3.15052	1.14e-17
10.11	3.14539	1.14e-17
10.12	3.14025	1.14e-17
10.13	3.13511	1.14e-17
10.14	3.12998	1.14e-17
10.15	3.12484	1.14e-17
10.16	3.1197	1.14e-17
10.17	3.11456	1.14e-17
10.18	3.10943	1.14e-17
10.19	3.10429	1.14e-17
10.2	3.09915	1.14e-17
10.21	3.09402	1.14e-17
10.22	3.08888	1.14e-17
10.23	3.08374	1.14e-17
10.24	3.07861	1.14e-17
10.25	3.07347	1.14e-17
10.26	3.06833	1.14e-17
10.27	3.0632	1.14e-17
10.28	3.05806	1.14e-17
10.29	3.05292	1.14e-17
10.3	3.04778	1.14e-17
10.31	3.04265	1.14e-17
10.32	3.03751	1.14e-17
10.33	3.03237	1.14e-17
10.34	3.02724	1.14e-17
10.35	3.0221	1.14e-17
10.36	3.01696	1.14e-17
10.37	3.01183	1.14e-17
10.38	3.00669	1.14e-17
10.39	3.00155	1.14e-17
10.4	2.99641	1.14e-17
10.41	2.99128	1.14e-17
10.42	2.98614	1.14e-17
10.43	2.981	1.14e-17
10.44	2.97587	1.14e-17
10.45	2.97073	1.14e-17
10.46	2.96559	1.14e-17
10.47	2.96046	1.14e-17
10.48	2.95532	1.14e-17
10.49	2.95018	1.14e-17
10.5	2.94504	1.14e-17
10.51	2.93991	1.14e-17
10.52	2.93477	1.14e-17
10.53	2.92963	1.14e-17
10.54	2.9245	1.14e-17
10.55	2.91936	1.14e-17
10.56	2.91422	1.14e-17
10.57	2.90909	1.14e-17
10.58	2.90395	1.14e-17
10.59	2.89881	1.14e-17
10.6	2.89368	1.14e-17
10.61	2.88854	1.14e-17
10.62	2.8834	1.14e-17
10.63	2.87826	1.14e-17
10.64	2.87313	1.14e-17
10.65	2.86799	1.14e-17
10.66	2.86285	1.14e-17
10.67	2.85772	1.14e-17
10.68	2.85258	1.14e-17
10.69	2.84744	1.14e-17
10.7	2.84231	1.14e-17
10.71	2.83717	1.14e-17
10.72	2.83203	1.14e-17
10.73	2.82689	1.14e-17
10.74	2.82176	1.14e-17
10.75	2.81662	1.14e-17
10.76	2.81148	1.14e-17
10.77	2.80635	1.14e-17
10.78	2.80121	1.14e-17
10.79	2.79607	1.14e-17
10.8	2.79094	1.14e-17
10.81	2.7858	1.14e-17
10.82	2.78066	1.14e-17
10.83	2.77552	1.14e-17
10.84	2.77039	1.14e-17
10.85	2.76525	1.14e-17
10.86	2.76011	1.14e-17
10.87	2.75498	1.14e-17
10.88	2.74984	1.14e-17
10.89	2.7447	1.14e-17
10.9	2.73957	1.14e-17
10.91	2.73443	1.14e-17
10.92	2.72929	1.14e-17
10.93	2.72415	1.14e-17
10.94	2.71902	1.14e-17
10.95	2.71388	1.14e-17
10.96	2.70874	1.14e-17
10.97	2.70361	1.14e-17
10.98	2.69847	1.14e-17
10.99	2.69333	1.14e-17
11	2.6882	1.14e-17
11.01	2.68306	1.14e-17
11.02	2.67792	1.14e-17
11.03	2.67279	1.14e-17
11.04	2.66765	1.14e-17
11.05	2.66251	1.14e-17
11.06	2.65737	1.14e-17
11.07	2.65224	1.14e-17
11.08	2.6471	1.14e-17
11.09	2.64196	1.14e-17
11.1	2.63683	1.14e-17
11.11	2.63169	1.14e-17
11.12	2.62655	1.14e-17
11.13	2.62142	1.14e-17
11.14	2.61628	1.14e-17
11.15	2.61114	1.14e-17
11.16	2.606	1.14e-17
11.17	2.60087	1.14e-17
11.18	2.59573	1.14e-17
11.19	2.59059	1.14e-17
11.2	2.58546	1.14e-17
11.21	2.58032	1.14e-17
11.22	2.57518	1.14e-17
11.23	2.57005	1.14e-17
11.24	2.56491	1.14e-17
11.25	2.55977	1.14e-17
11.26	2.55463	1.14e-17
11.27	2.5495	1.14e-17
11.28	2.54436	1.14e-17
11.29	2.53922	1.14e-17
11.3	2.53409	1.14e-17
11.31	2.52895	1.14e-17
11.32	2.52381	1.14e-17
11.33	2.51868	1.14e-17
11.34	2.51354	1.14e-17
11.35	2.5084	1.14e-17
11.36	2.50327	1.14e-17
11.37	2.49813	1.14e-17
11.38	2.49299	1.14e-17
11.39	2.48785	1.14e-17
11.4	2.48272	1.14e-17
11.41	2.47758	1.14e-17
11.42	2.47244	1.14e-17
11.43	2.46731	1.14e-17
11.44	2.46217	1.14e-17
11.45	2.45703	1.14e-17
11.46	2.4519	1.14e-17
11.47	2.44676	1.14e-17
11.48	2.44162	1.14e-17
11.49	2.43648	1.14e-17
11.5	2.43135	1.14e-17
11.51	2.42621	1.14e-17
11.52	2.42107	1.14e-17
11.53	2.41594	1.14e-17
11.54	2.4108	1.14e-17
11.55	2.40566	1.14e-17
11.56	2.40053	1.14e-17
11.57	2.39539	1.14e-17
11.58	2.39025	1.14e-17
11.59	2.38511	1.14e-17
11.6	2.37998	1.14e-17
11.61	2.37484	1.14e-17
11.62	2.3697	1.14e-17
11.63	2.36457	1.14e-17
11.64	2.35943	1.14e-17
11.65	2.35429	1.14e-17
11.66	2.34916	1.14e-17
11.67	2.34402	1.14e-17
11.68	2.33888	1.14e-17
11.69	2.33375	1.14e-17
11.7	2.32861	1.14e-17
11.71	2.32347	1.14e-17
11.72	2.31833	1.14e-17
11.73	2.3132	1.14e-17
11.74	2.30806	1.14e-17
11.75	2.30292	1.14e-17
11.76	2.29779	1.14e-17
11.77	2.29265	1.14e-17
11.78	2.28751	1.14e-17
11.79	2.28238	1.14e-17
11.8	2.27724	1.14e-17
11.81	2.2721	1.14e-17
11.82	2.26696	1.14e-17
11.83	2.26183	1.14e-17
11.84	2.25669	1.14e-17
11.85	2.25155	1.14e-17
11.86	2.24642	1.14e-17
11.87	2.24128	1.14e-17
11.88	2.23614	1.14e-17
11.89	2.23101	1.14e-17
11.9	2.22587	1.14e-17
11.91	2.22073	1.14e-17
11.92	2.21559	1.14e-17
11.93	2.21046	1.14e-17
11.94	2.20532	1.14e-17
11.95	2.20018	1.14e-17
11.96	2.19505	1.14e-17
11.97	2.18991	1.14e-17
11.98	2.18477	1.14e-17
11.99	2.17964	1.14e-17
12	2.1745	1.14e-17
12.01	2.16936	1.14e-17
12.02	2.16423	1.14e-17
12.03	2.15909	1.14e-17
12.04	2.15395	1.14e-17
12.05	2.14881	1.14e-17
12.06	2.14368	1.14e-17
12.07	2.13854	1.14e-17
12.08	2.1334	1.14e-17
12.09	2.12827	1.14e-17
12.1	2.12313	1.14e-17
12.11	2.11799	1.14e-17
12.12	2.11286	1.14e-17
12.13	2.10772	1.14e-17
12.14	2.10258	1.14e-17
12.15	2.09744	1.14e-17
12.16	2.09231	1.14e-17
12.17	2.08717	1.14e-17
12.18	2.08203	1.14e-17
12.19	2.0769	1.14e-17
12.2	2.07176	1.14e-17
12.21	2.06662	1.14e-17
12.22	2.06149	1.14e-17
12.23	2.05635	1.14e-17
12.24	2.05121	1.14e-17
12.25	2.04607	1.14e-17
12.26	2.04094	1.14e-17
12.27	2.0358	1.14e-17
12.28	2.03066	1.14e-17
12.29	2.02553	1.14e-17
12.3	2.02039	1.14e-17
12.31	2.01525	1.14e-17
12.32	2.01012	1.14e-17
12.33	2.00498	1.14e-17
12.34	1.99984	1.14e-17
12.35	1.99471	1.14e-17
12.36	1.98957	1.14e-17
12.37	1.98443	1.14e-17
12.38	1.97929	1.14e-17
12.39	1.97416	1.14e-17
12.4	1.96902	1.14e-17
12.41	1.96388	1.14e-17
12.42	1.95875	1.14e-17
12.43	1.95361	1.14e-17
12.44	1.94847	1.14e-17
12.45	1.94334	1.14e-17
12.46	1.9382	1.14e-17
12.47	1.93306	1.14e-17
12.48	1.92792	1.14e-17
12.49	1.92279	1.14e-17
12.5	1.91765	1.14e-17
12.51	1.91251	1.14e-17
12.52	1.90738	1.14e-17
12.53	1.90224	1.14e-17
12.54	1.8971	1.14e-17
12.55	1.89197	1.14e-17
12.56	1.88683	1.14e-17
12.57	1.88169	1.14e-17
12.58	1.87655	1.14e-17
12.59	1.87142	1.14e-17
12.6	1.86628	1.14e-17
12.61	1.86114	1.14e-17
12.62	1.85601	1.14e-17
12.63	1.85087	1.14e-17
12.64	1.84573	1.14e-17
12.65	1.8406	1.14e-17
12.66	1.83546	1.14e-17
12.67	1.83032	1.14e-17
12.68	1.82518	1.14e-17
12.69	1.82005	1.14e-17
12.7	1.81491	1.14e-17
12.71	1.80977	1.14e-17
12.72	1.80464	1.14e-17
12.73	1.7995	1.14e-17
12.74	1.79436	1.14e-17
12.75	1.78923	1.14e-17
12.76	1.78409	1.14e-17
12.77	1.77895	1.14e-17
12.78	1.77382	1.14e-17
12.79	1.76868	1.14e-17
12.8	1.76354	1.14e-17
12.81	1.7584	1.14e-17
12.82	1.75327	1.14e-17
12.83	1.74813	1.14e-17
12.84	1.74299	1.14e-17
12.85	1.73786	1.14e-17
12.86	1.73272	1.14e-17
12.87	1.72758	1.14e-17
12.88	1.72245	1.14e-17
12.89	1.71731	1.14e-17
12.9	1.71217	1.14e-17
12.91	1.70703	1.14e-17
12.92	1.7019	1.14e-17
12.93	1.69676	1.14e-17
12.94	1.69162	1.14e-17
12.95	1.68649	1.14e-17
12.96	1.68135	1.14e-17
12.97	1.67621	1.14e-17
12.98	1.67108	1.14e-17
12.99	1.66594	1.14e-17
13	1.6608	1.14e-17
13.01	1.65566	1.14e-17
13.02	1.65053	1.14e-17
13.03	1.64539	1.14e-17
13.04	1.64025	1.14e-17
13.05	1.63512	1.14e-17
13.06	1.62998	1.14e-17
13.07	1.62484	1.14e-17
13.08	1.61971	1.14e-17
13.09	1.61457	1.14e-17
13.1	1.60943	1.14e-17
13.11	1.6043	1.14e-17
13.12	1.59916	1.14e-17
13.13	1.59402	1.14e-17
13.14	1.58888	1.14e-17
13.15	1.58375	1.14e-17
13.16	1.57861	1.14e-17
13.17	1.57347	1.14e-17
13.18	1.56834	1.14e-17
13.19	1.5632	1.14e-17
13.2	1.55806	1.14e-17
13.21	1.55293	1.14e-17
13.22	1.54779	1.14e-17
13.23	1.54265	1.14e-17
13.24	1.53751	1.14e-17
13.25	1.53238	1.14e-17
13.26	1.52724	1.14e-17
13.27	1.5221	1.14e-17
13.28	1.51697	1.14e-17
13.29	1.51183	1.14e-17
13.3	1.50669	1.14e-17
13.31	1.50156	1.14e-17
13.32	1.49642	1.14e-17
13.33	1.49128	1.14e-17
13.34	1.48614	1.14e-17
13.35	1.48101	1.14e-17
13.36	1.47587	1.14e-17
13.37	1.47073	1.14e-17
13.38	1.4656	1.14e-17
13.39	1.46046	1.14e-17
13.4	1.45532	1.14e-17
13.41	1.45019	1.14e-17
13.42	1.44505	1.14e-17
13.43	1.43991	1.14e-17
13.44	1.43478	1.14e-17
13.45	1.42964	1.14e-17
13.46	1.4245	1.14e-17
13.47	1.41936	1.14e-17
13.48	1.41423	1.14e-17
13.49	1.40909	1.14e-17
13.5	1.40395	1.14e-17
13.51	1.39882	1.14e-17
13.52	1.39368	1.14e-17
13.53	1.38854	1.14e-17
13.54	1.38341	1.14e-17
13.55	1.37827	1.14e-17
13.56	1.37313	1.14e-17
13.57	1.36799	1.14e-17
13.58	1.36286	1.14e-17
13.59	1.35772	1.14e-17
13.6	1.35258	1.14e-17
13.61	1.34745	1.14e-17
13.62	1.34231	1.14e-17
13.63	1.33717	1.14e-17
13.64	1.33204	1.14e-17
13.65	1.3269	1.14e-17
13.66	1.32176	1.14e-17
13.67	1.31662	1.14e-17
13.68	1.31149	1.14e-17
13.69	1.30635	1.14e-17
13.7	1.30121	1.14e-17
13.71	1.29608	1.14e-17
13.72	1.29094	1.14e-17
13.73	1.2858	1.14e-17
13.74	1.28067	1.14e-17
13.75	1.27553	1.14e-17
13.76	1.27039	1.14e-17
13.77	1.26526	1.14e-17
13.78	1.26012	1.14e-17
13.79	1.25498	1.14e-17
13.8	1.24984	1.14e-17
13.81	1.24471	1.14e-17
13.82	1.23957	1.14e-17
13.83	1.23443	1.14e-17
13.84	1.2293	1.14e-17
13.85	1.22416	1.14e-17
13.86	1.21902	1.14e-17
13.87	1.21389	1.14e-17
13.88	1.20875	1.14e-17
13.89	1.20361	1.14e-17
13.9	1.19847	1.14e-17
13.91	1.19334	1.14e-17
13.92	1.1882	1.14e-17
13.93	1.18306	1.14e-17
13.94	1.17793	1.14e-17
13.95	1.17279	1.14e-17
13.96	1.16765	1.14e-17
13.97	1.16252	1.14e-17
13.98	1.15738	1.14e-17
13.99	1.15224	1.14e-17
14	1.1471	1.14e-17
14.01	1.14197	1.14e-17
14.02	1.13683	1.14e-17
14.03	1.13169	1.14e-17
14.04	1.12656	1.14e-17
14.05	1.12142	1.14e-17
14.06	1.11628	1.14e-17
14.07	1.11115	1.14e-17
14.08	1.10601	1.14e-17
14.09	1.10087	1.14e-17
14.1	1.09573	1.14e-17
14.11	1.0906	1.14e-17
14.12	1.08546	1.14e-17
14.13	1.08032	1.14e-17
14.14	1.07519	1.14e-17
14.15	1.07005	1.14e-17
14.16	1.06491	1.14e-17
14.17	1.05978	1.14e-17
14.18	1.05464	1.14e-17
14.19	1.0495	1.14e-17
14.2	1.04437	1.14e-17
14.21	1.03923	1.14e-17
14.22	1.03409	1.14e-17
14.23	1.02895	1.14e-17
14.24	1.02382	1.14e-17
14.25	1.01868	1.14e-17
14.26	1.01354	1.14e-17
14.27	1.00841	1.14e-17
14.28	1.00327	1.14e-17
14.29	0.998133	1.14e-17
14.3	0.992996	1.14e-17
14.31	0.987859	1.14e-17
14.32	0.982722	1.14e-17
14.33	0.977585	1.14e-17
14.34	0.972448	1.14e-17
14.35	0.967311	1.14e-17
14.36	0.962174	1.14e-17
14.37	0.957037	1.14e-17
14.38	0.9519	1.14e-17
14.39	0.946763	1.14e-17
14.4	0.941626	1.14e-17
14.41	0.936489	1.14e-17
14.42	0.931352	1.14e-17
14.43	0.926215	1.14e-17
14.44	0.921078	1.14e-17
14.45	0.915941	1.14e-17
14.46	0.910804	1.14e-17
14.47	0.905667	1.14e-17
14.48	0.90053	1.14e-17
14.49	0.895393	1.14e-17
14.5	0.890256	1.14e-17
14.51	0.885119	1.14e-17
14.52	0.879982	1.14e-17
14.53	0.874845	1.14e-17
14.54	0.869708	1.14e-17
14.55	0.864571	1.14e-17
14.56	0.859434	1.14e-17
14.57	0.854297	1.14e-17
14.58	0.84916	1.14e-17
14.59	0.844023	1.14e-17
14.6	0.838886	1.14e-17
14.61	0.833749	1.14e-17
14.62	0.828612	1.14e-17
14.63	0.823475	1.14e-17
14.64	0.818339	1.14e-17
14.65	0.813202	1.14e-17
14.66	0.808065	1.14e-17
14.67	0.802928	1.14e-17
14.68	0.797791	1.14e-17
14.69	0.792654	1.14e-17
14.7	0.787517	1.14e-17
14.71	0.78238	1.14e-17
14.72	0.777243	1.14e-17
14.73	0.772106	1.14e-17
14.74	0.766969	1.14e-17
14.75	0.761832	1.14e-17
14.76	0.756695	1.14e-17
14.77	0.751558	1.14e-17
14.78	0.746421	1.14e-17
14.79	0.741284	1.14e-17
14.8	0.736147	1.14e-17
14.81	0.73101	1.14e-17
14.82	0.725873	1.14e-17
14.83	0.720736	1.14e-17
14.84	0.715599	1.14e-17
14.85	0.710462	1.14e-17
14.86	0.705325	1.14e-17
14.87	0.700188	1.14e-17
14.88	0.695051	1.14e-17
14.89	0.689914	1.14e-17
14.9	0.684777	1.14e-17
14.91	0.67964	1.14e-17
14.92	0.674503	1.14e-17
14.93	0.669366	1.14e-17
14.94	0.664229	1.14e-17
14.95	0.659092	1.14e-17
14.96	0.653955	1.14e-17
14.97	0.648818	1.14e-17
14.98	0.643681	1.14e-17
14.99	0.638545	1.14e-17
15	0.633408	1.14e-17
15.01	0.628271	1.14e-17
15.02	0.623134	1.14e-17
15.03	0.617997	1.14e-17
15.04	0.61286	1.14e-17
15.05	0.607723	1.14e-17
15.06	0.602586	1.14e-17
15.07	0.597449	1.14e-17
15.08	0.592312	1.14e-17
15.09	0.587175	1.14e-17
15.1	0.582038	1.14e-17
15.11	0.576901	1.14e-17
15.12	0.571764	1.14e-17
15.13	0.566627	1.14e-17
15.14	0.56149	1.14e-17
15.15	0.556353	1.14e-17
15.16	0.551216	1.14e-17
15.17	0.546079	1.14e-17
15.18	0.540942	1.14e-17
15.19	0.535805	1.14e-17
15.2	0.530668	1.14e-17
15.21	0.525531	1.14e-17
15.22	0.520394	1.14e-17
15.23	0.515257	1.14e-17
15.24	0.51012	1.14e-17
15.25	0.504983	1.14e-17
15.26	0.499846	1.14e-17
15.27	0.494709	1.14e-17
15.28	0.489572	1.14e-17
15.29	0.484435	1.14e-17
15.3	0.479298	1.14e-17
15.31	0.474161	1.14e-17
15.32	0.469024	1.14e-17
15.33	0.463887	1.14e-17
15.34	0.458751	1.14e-17
15.35	0.453614	1.14e-17
15.36	0.448477	1.14e-17
15.37	0.44334	1.14e-17
15.38	0.438203	1.14e-17
15.39	0.433066	1.14e-17
15.4	0.427929	1.14e-17
15.41	0.422792	1.14e-17
15.42	0.417655	1.14e-17
15.43	0.412518	1.14e-17
15.44	0.407381	1.14e-17
15.45	0.402244	1.14e-17
15.46	0.397107	1.14e-17
15.47	0.39197	1.14e-17
15.48	0.386833	1.14e-17
15.49	0.381696	1.14e-17
15.5	0.376559	1.14e-17
15.51	0.371422	1.14e-17
15.52	0.366285	1.14e-17
15.53	0.361148	1.14e-17
15.54	0.356011	1.14e-17
15.55	0.350874	1.14e-17
15.56	0.345737	1.14e-17
15.57	0.3406	1.14e-17
15.58	0.335463	1.14e-17
15.59	0.330326	1.14e-17
15.6	0.325189	1.14e-17
15.61	0.320052	1.14e-17
15.62	0.314915	1.14e-17
15.63	0.309778	1.14e-17
15.64	0.304641	1.14e-17
15.65	0.299504	1.14e-17
15.66	0.294367	1.14e-17
15.67	0.28923	1.14e-17
15.68	0.284093	1.14e-17
15.69	0.278957	1.14e-17
15.7	0.27382	1.14e-17
15.71	0.268683	1.14e-17
15.72	0.263546	1.14e-17
15.73	0.258409	1.14e-17
15.74	0.253272	1.14e-17
15.75	0.248135	1.14e-17
15.76	0.242998	1.14e-17
15.77	0.237861	1.14e-17
15.78	0.232724	1.14e-17
15.79	0.227587	1.14e-17
15.8	0.22245	1.14e-17
15.81	0.217313	1.14e-17
15.82	0.212176	1.14e-17
15.83	0.207039	1.14e-17
15.84	0.201902	1.14e-17
15.85	0.196765	1.14e-17
15.86	0.191628	1.14e-17
15.87	0.186491	1.14e-17
15.88	0.181354	1.14e-17
15.89	0.176217	1.14e-17
15.9	0.17108	1.14e-17
15.91	0.165943	1.14e-17
15.92	0.160806	1.14e-17
15.93	0.155669	1.14e-17
15.94	0.150532	1.14e-17
15.95	0.145395	1.14e-17
15.96	0.140258	1.14e-17
15.97	0.135121	1.14e-17
15.98	0.129984	1.14e-17
15.99	0.124847	1.14e-17
16	0.11971	1.14e-17
16.01	0.114573	1.14e-17
16.02	0.109436	1.14e-17
16.03	0.104299	1.14e-17
16.04	0.0991625	1.14e-17
16.05	0.0940255	1.14e-17
16.06	0.0888886	1.14e-17
16.07	0.0837516	1.14e-17
16.08	0.0786146	1.14e-17
16.09	0.0734777	1.14e-17
16.1	0.0683407	1.14e-17
16.11	0.0632037	1.14e-17
16.12	0.0580667	1.14e-17
16.13	0.0529298	1.14e-17
16.14	0.0477928	1.14e-17
16.15	0.0426558	1.14e-17
16.16	0.0375189	1.14e-17
16.17	0.0323819	1.14e-17
16.18	0.0272449	1.14e-17
16.19	0.0221079	1.14e-17
16.2	0.016971	1.14e-17
16.21	0.011834	1.14e-17
16.22	0.00669702	1.14e-17
16.23	0.00156005	1.14e-17
16.24	-0.00357692	1.14e-17
16.25	-0.00871389	1.14e-17
16.26	-0.0138509	1.14e-17
16.27	-0.0189878	1.14e-17
16.28	-0.0241248	1.14e-17
16.29	-0.0292618	1.14e-17
16.3	-0.0343987	1.14e-17
16.31	-0.0395357	1.14e-17
16.32	-0.0446727	1.14e-17
16.33	-0.0498097	1.14e-17
16.34	-0.0549466	1.14e-17
16.35	-0.0600836	1.14e-17
16.36	-0.0652206	1.14e-17
16.37	-0.0703575	1.14e-17
16.38	-0.0754945	1.14e-17
16.39	-0.0806315	1.14e-17
16.4	-0.0857685	1.14e-17
16.41	-0.0909054	1.14e-17
16.42	-0.0960424	1.14e-17
16.43	-0.101179	1.14e-17
16.44	-0.106316	1.14e-17
16.45	-0.111453	1.14e-17
16.46	-0.11659	1.14e-17
16.47	-0.121727	1.14e-17
16.48	-0.126864	1.14e-17
16.49	-0.132001	1.14e-17
16.5	-0.137138	1.14e-17
16.51	-0.142275	1.14e-17
16.52	-0.147412	1.14e-17
16.53	-0.152549	1.14e-17
16.54	-0.157686	1.14e-17
16.55	-0.162823	1.14e-17
16.56	-0.16796	1.14e-17
16.57	-0.173097	1.14e-17
16.58	-0.178234	1.14e-17
16.59	-0.183371	1.14e-17
16.6	-0.188508	1.14e-17
16.61	-0.193645	1.14e-17
16.62	-0.198782	1.14e-17
16.63	-0.203919	1.14e-17
16.64	-0.209056	1.14e-17
16.65	-0.214193	1.14e-17
16.66	-0.21933	1.14e-17
16.67	-0.224467	1.14e-17
16.68	-0.229604	1.14e-17
16.69	-0.234741	1.14e-17
16.7	-0.239878	1.14e-17
16.71	-0.245015	1.14e-17
16.72	-0.250152	1.14e-17
16.73	-0.255289	1.14e-17
16.74	-0.260425	1.14e-17
16.75	-0.265562	1.14e-17
16.76	-0.270699	1.14e-17
16.77	-0.275836	1.14e-17
16.78	-0.280973	1.14e-17
16.79	-0.28611	1.14e-17
16.8	-0.291247	1.14e-17
16.81	-0.296384	1.14e-17
16.82	-0.301521	1.14e-17
16.83	-0.306658	1.14e-17
16.84	-0.311795	1.14e-17
16.85	-0.316932	1.14e-17
16.86	-0.322069	1.14e-17
16.87	-0.327206	1.14e-17
16.88	-0.332343	1.14e-17
16.89	-0.33748	1.14e-17
16.9	-0.342617	1.14e-17
16.91	-0.347754	1.14e-17
16.92	-0.352891	1.14e-17
16.93	-0.358028	1.14e-17
16.94	-0.363165	1.14e-17
16.95	-0.368302	1.14e-17
16.96	-0.373439	1.14e-17
16.97	-0.378576	1.14e-17
16.98	-0.383713	1.14e-17
16.99	-0.38885	1.14e-17
17	-0.393987	1.14e-17
17.01	-0.399124	1.14e-17
17.02	-0.404261	1.14e-17
17.03	-0.409398	1.14e-17
17.04	-0.414535	1.14e-17
17.05	-0.419672	1.14e-17
17.06	-0.424809	1.14e-17
17.07	-0.429946	1.14e-17
17.08	-0.435083	1.14e-17
17.09	-0.440219	1.14e-17
17.1	-0.445356	1.14e-17
17.11	-0.450493	1.14e-17
17.12	-0.45563	1.14e-17
17.13	-0.460767	1.14e-17
17.14	-0.465904	1.14e-17
17.15	-0.471041	1.14e-17
17.16	-0.476178	1.14e-17
17.17	-0.481315	1.14e-17
17.18	-0.486452	1.14e-17
17.19	-0.491589	1.14e-17
17.2	-0.496726	1.14e-17
17.21	-0.501863	1.14e-17
17.22	-0.507	1.14e-17
17.23	-0.512137	1.14e-17
17.24	-0.517274	1.14e-17
17.25	-0.522411	1.14e-17
17.26	-0.527548	1.14e-17
17.27	-0.532685	1.14e-17
17.28	-0.537822	1.14e-17
17.29	-0.542959	1.14e-17
17.3	-0.548096	1.14e-17
17.31	-0.553233	1.14e-17
17.32	-0.55837	1.14e-17
17.33	-0.563507	1.14e-17
17.34	-0.568644	1.14e-17
17.35	-0.573781	1.14e-17
17.36	-0.578918	1.14e-17
17.37	-0.584055	1.14e-17
17.38	-0.589192	1.14e-17
17.39	-0.594329	1.14e-17
17.4	-0.599466	1.14e-17
17.41	-0.604603	1.14e-17
17.42	-0.60974	1.14e-17
17.43	-0.614877	1.14e-17
17.44	-0.620013	1.14e-17
17.45	-0.62515	1.14e-17
17.46	-0.630287	1.14e-17
17.47	-0.635424	1.14e-17
17.48	-0.640561	1.14e-17
17.49	-0.645698	1.14e-17
17.5	-0.650835	1.14e-17
17.51	-0.655972	1.14e-17
17.52	-0.661109	1.14e-17
17.53	-0.666246	1.14e-17
17.54	-0.671383	1.14e-17
17.55	-0.67652	1.14e-17
17.56	-0.681657	1.14e-17
17.57	-0.686794	1.14e-17
17.58	-0.691931	1.14e-17
17.59	-0.697068	1.14e-17
17.6	-0.702205	1.14e-17
17.61	-0.707342	1.14e-17
17.62	-0.712479	1.14e-17
17.63	-0.717616	1.14e-17
17.64	-0.722753	1.14e-17
17.65	-0.72789	1.14e-17
17.66	-0.733027	1.14e-17
17.67	-0.738164	1.14e-17
17.68	-0.743301	1.14e-17
17.69	-0.748438	1.14e-17
17.7	-0.753575	1.14e-17
17.71	-0.758712	1.14e-17
17.72	-0.763849	1.14e-17
17.73	-0.768986	1.14e-17
17.74	-0.774123	1.14e-17
17.75	-0.77926	1.14e-17
17.76	-0.784397	1.14e-17
17.77	-0.789534	1.14e-17
17.78	-0.794671	1.14e-17
17.79	-0.799808	1.14e-17
17.8	-0.804944	1.14e-17
17.81	-0.810081	1.14e-17
17.82	-0.815218	1.14e-17
17.83	-0.820355	1.14e-17
17.84	-0.825492	1.14e-17
17.85	-0.830629	1.14e-17
17.86	-0.835766	1.14e-17
17.87	-0.840903	1.14e-17
17.88	-0.84604	1.14e-17
17.89	-0.851177	1.14e-17
17.9	-0.856314	1.14e-17
17.91	-0.861451	1.14e-17
17.92	-0.866588	1.14e-17
17.93	-0.871725	1.14e-17
17.94	-0.876862	1.14e-17
17.95	-0.881999	1.14e-17
17.96	-0.887136	1.14e-17
17.97	-0.892273	1.14e-17
17.98	-0.89741	1.14e-17
17.99	-0.902547	1.14e-17
18	-0.907684	1.14e-17
18.01	-0.912821	1.14e-17
18.02	-0.917958	1.14e-17
18.03	-0.923095	1.14e-17
18.04	-0.928232	1.14e-17
18.05	-0.933369	1.14e-17
18.06	-0.938506	1.14e-17
18.07	-0.943643	1.14e-17
18.08	-0.94878	1.14e-17
18.09	-0.953917	1.14e-17
18.1	-0.959054	1.14e-17
18.11	-0.964191	1.14e-17
18.12	-0.969328	1.14e-17
18.13	-0.974465	1.14e-17
18.14	-0.979602	1.14e-17
18.15	-0.984738	1.14e-17
18.16	-0.989875	1.14e-17
18.17	-0.995012	1.14e-17
18.18	-1.00015	1.14e-17
18.19	-1.00529	1.14e-17
18.2	-1.01042	1.14e-17
18.21	-1.01556	1.14e-17
18.22	-1.0207	1.14e-17
18.23	-1.02583	1.14e-17
18.24	-1.03097	1.14e-17
18.25	-1.03611	1.14e-17
18.26	-1.04125	1.14e-17
18.27	-1.04638	1.14e-17
18.28	-1.05152	1.14e-17
18.29	-1.05666	1.14e-17
18.3	-1.06179	1.14e-17
18.31	-1.06693	1.14e-17
18.32	-1.07207	1.14e-17
18.33	-1.0772	1.14e-17
18.34	-1.08234	1.14e-17
18.35	-1.08748	1.14e-17
18.36	-1.09261	1.14e-17
18.37	-1.09775	1.14e-17
18.38	-1.10289	1.14e-17
18.39	-1.10803	1.14e-17
18.4	-1.11316	1.14e-17
18.41	-1.1183	1.14e-17
18.42	-1.12344	1.14e-17
18.43	-1.12857	1.14e-17
18.44	-1.13371	1.14e-17
18.45	-1.13885	1.14e-17
18.46	-1.14398	1.14e-17
18.47	-1.14912	1.14e-17
18.48	-1.15426	1.14e-17
18.49	-1.1594	1.14e-17
18.5	-1.16453	1.14e-17
18.51	-1.16967	1.14e-17
18.52	-1.17481	1.14e-17
18.53	-1.17994	1.14e-17
18.54	-1.18508	1.14e-17
18.55	-1.19022	1.14e-17
18.56	-1.19535	1.14e-17
18.57	-1.20049	1.14e-17
18.58	-1.20563	1.14e-17
18.59	-1.21077	1.14e-17
18.6	-1.2159	1.14e-17
18.61	-1.22104	1.14e-17
18.62	-1.22618	1.14e-17
18.63	-1.23131	1.14e-17
18.64	-1.23645	1.14e-17
18.65	-1.24159	1.14e-17
18.66	-1.24672	1.14e-17
18.67	-1.25186	1.14e-17
18.68	-1.257	1.14e-17
18.69	-1.26213	1.14e-17
18.7	-1.26727	1.14e-17
18.71	-1.27241	1.14e-17
18.72	-1.27755	1.14e-17
18.73	-1.28268	1.14e-17
18.74	-1.28782	1.14e-17
18.75	-1.29296	1.14e-17
18.76	-1.29809	1.14e-17
18.77	-1.30323	1.14e-17
18.78	-1.30837	1.14e-17
18.79	-1.3135	1.14e-17
18.8	-1.31864	1.14e-17
18.81	-1.32378	1.14e-17
18.82	-1.32892	1.14e-17
18.83	-1.33405	1.14e-17
18.84	-1.33919	1.14e-17
18.85	-1.34433	1.14e-17
18.86	-1.34946	1.14e-17
18.87	-1.3546	1.14e-17
18.88	-1.35974	1.14e-17
18.89	-1.36487	1.14e-17
18.9	-1.37001	1.14e-17
18.91	-1.37515	1.14e-17
18.92	-1.38029	1.14e-17
18.93	-1.38542	1.14e-17
18.94	-1.39056	1.14e-17
18.95	-1.3957	1.14e-17
18.96	-1.40083	1.14e-17
18.97	-1.40597	1.14e-17
18.98	-1.41111	1.14e-17
18.99	-1.41624	1.14e-17
19	-1.42138	1.14e-17
19.01	-1.42652	1.14e-17
19.02	-1.43166	1.14e-17
19.03	-1.43679	1.14e-17
19.04	-1.44193	1.14e-17
19.05	-1.44707	1.14e-17
19.06	-1.4522	1.14e-17
19.07	-1.45734	1.14e-17
19.08	-1.46248	1.14e-17
19.09	-1.46761	1.14e-17
19.1	-1.47275	1.14e-17
19.11	-1.47789	1.14e-17
19.12	-1.48302	1.14e-17
19.13	-1.48816	1.14e-17
19.14	-1.4933	1.14e-17
19.15	-1.49844	1.14e-17
19.16	-1.50357	1.14e-17
19.17	-1.50871	1.14e-17
19.18	-1.51385	1.14e-17
19.19	-1.51898	1.14e-17
19.2	-1.52412	1.14e-17
19.21	-1.52926	1.14e-17
19.22	-1.53439	1.14e-17
19.23	-1.53953	1.14e-17
19.24	-1.54467	1.14e-17
19.25	-1.54981	1.14e-17
19.26	-1.55494	1.14e-17
19.27	-1.56008	1.14e-17
19.28	-1.56522	1.14e-17
19.29	-1.57035	1.14e-17
19.3	-1.57549	1.14e-17
19.31	-1.58063	1.14e-17
19.32	-1.58576	1.14e-17
19.33	-1.5909	1.14e-17
19.34	-1.59604	1.14e-17
19.35	-1.60118	1.14e-17
19.36	-1.60631	1.14e-17
19.37	-1.61145	1.14e-17
19.38	-1.61659	1.14e-17
19.39	-1.62172	1.14e-17
19.4	-1.62686	1.14e-17
19.41	-1.632	1.14e-17
19.42	-1.63713	1.14e-17
19.43	-1.64227	1.14e-17
19.44	-1.64741	1.14e-17
19.45	-1.65254	1.14e-17
19.46	-1.65768	1.14e-17
19.47	-1.66282	1.14e-17
19.48	-1.66796	1.14e-17
19.49	-1.67309	1.14e-17
19.5	-1.67823	1.14e-17
19.51	-1.68337	1.14e-17
19.52	-1.6885	1.14e-17
19.53	-1.69364	1.14e-17
19.54	-1.69878	1.14e-17
19.55	-1.70391	1.14e-17
19.56	-1.70905	1.14e-17
19.57	-1.71419	1.14e-17
19.58	-1.71933	1.14e-17
19.59	-1.72446	1.14e-17
19.6	-1.7296	1.14e-17
19.61	-1.73474	1.14e-17
19.62	-1.73987	1.14e-17
19.63	-1.74501	1.14e-17
19.64	-1.75015	1.14e-17
19.65	-1.75528	1.14e-17
19.66	-1.76042	1.14e-17
19.67	-1.76556	1.14e-17
19.68	-1.7707	1.14e-17
19.69	-1.77583	1.14e-17
19.7	-1.78097	1.14e-17
19.71	-1.78611	1.14e-17
19.72	-1.79124	1.14e-17
19.73	-1.79638	1.14e-17
19.74	-1.80152	1.14e-17
19.75	-1.80665	1.14e-17
19.76	-1.81179	1.14e-17
19.77	-1.81693	1.14e-17
19.78	-1.82206	1.14e-17
19.79	-1.8272	1.14e-17
19.8	-1.83234	1.14e-17
19.81	-1.83748	1.14e-17
19.82	-1.84261	1.14e-17
19.83	-1.84775	1.14e-17
19.84	-1.85289	1.14e-17
19.85	-1.85802	1.14e-17
19.86	-1.86316	1.14e-17
19.87	-1.8683	1.14e-17
19.88	-1.87343	1.14e-17
19.89	-1.87857	1.14e-17
19.9	-1.88371	1.14e-17
19.91	-1.88885	1.14e-17
19.92	-1.89398	1.14e-17
19.93	-1.89912	1.14e-17
19.94	-1.90426	1.14e-17
19.95	-1.90939	1.14e-17
19.96	-1.91453	1.14e-17
19.97	-1.91967	1.14e-17
19.98	-1.9248	1.14e-17
[truncated: 802 more rows]

## Sheet: FigS2 C(point)
Day	RM1	RM2	RM3	RM4	RM5
0
1	7.66748	7.45777	6.58035	7.82274	5.36584
2
3	6.58239	5.93156	4.43903	6.96146	5.60002
4
5
6
7	4.90622	4.11661	2.3084	3.08218	3.20506

## Sheet: FigS2 C(line)
time	RM1	RM2	RM3	RM4	RM5
0	3.64965	3.70252	3.80742	3.67902	3.69401
0.01	3.61706	3.66993	3.77478	3.64639	3.66136
0.02	3.60635	3.6592	3.76389	3.63555	3.65043
0.03	3.61623	3.66902	3.7734	3.64518	3.65995
0.04	3.64378	3.69648	3.80041	3.67238	3.687
0.05	3.68531	3.73788	3.84123	3.71348	3.72793
0.06	3.73721	3.78962	3.89231	3.76488	3.77917
0.07	3.79644	3.84866	3.95065	3.82359	3.83771
0.08	3.86069	3.9127	4.01394	3.88728	3.90125
0.09	3.92827	3.98007	4.08054	3.95429	3.96811
0.1	3.99804	4.04962	4.14931	4.02349	4.03717
0.11	4.06924	4.12059	4.21949	4.09411	4.10765
0.12	4.14135	4.19247	4.29058	4.16565	4.17905
0.13	4.21404	4.26494	4.36226	4.23777	4.25104
0.14	4.28712	4.33778	4.43431	4.31027	4.3234
0.15	4.36043	4.41085	4.50659	4.38301	4.39601
0.16	4.43389	4.48408	4.57902	4.45589	4.46876
0.17	4.50745	4.5574	4.65154	4.52888	4.54161
0.18	4.58106	4.63077	4.72412	4.60191	4.61451
0.19	4.65471	4.70418	4.79672	4.67499	4.68745
0.2	4.72837	4.77761	4.86934	4.74807	4.7604
0.21	4.80204	4.85104	4.94196	4.82117	4.83336
0.22	4.87572	4.92446	5.01457	4.89427	4.90632
0.23	4.94938	4.99789	5.08717	4.96736	4.97927
0.24	5.02304	5.07129	5.15974	5.04043	5.0522
0.25	5.09669	5.14468	5.23229	5.1135	5.12512
0.26	5.17031	5.21805	5.30481	5.18654	5.19801
0.27	5.24391	5.2914	5.37729	5.25956	5.27087
0.28	5.31749	5.36471	5.44972	5.33254	5.3437
0.29	5.39103	5.43798	5.52209	5.4055	5.41649
0.3	5.46454	5.5112	5.5944	5.47841	5.48922
0.31	5.538	5.58437	5.66663	5.55127	5.5619
0.32	5.6114	5.65748	5.73877	5.62407	5.63451
0.33	5.68474	5.7305	5.81079	5.6968	5.70704
0.34	5.758	5.80344	5.88269	5.76945	5.77947
0.35	5.83117	5.87627	5.95444	5.842	5.85179
0.36	5.90424	5.94897	6.026	5.91444	5.92397
0.37	5.97717	6.02153	6.09736	5.98674	5.996
0.38	6.04996	6.09391	6.16847	6.05888	6.06784
0.39	6.12258	6.16608	6.23928	6.13083	6.13946
0.4	6.19498	6.23801	6.30976	6.20256	6.21083
0.41	6.26714	6.30965	6.37984	6.27403	6.28189
0.42	6.33902	6.38095	6.44946	6.34519	6.3526
0.43	6.41055	6.45186	6.51853	6.41599	6.42289
0.44	6.48169	6.52231	6.58697	6.48638	6.4927
0.45	6.55237	6.59221	6.65469	6.55627	6.56195
0.46	6.6225	6.66149	6.72156	6.62559	6.63054
0.47	6.69201	6.73004	6.78747	6.69425	6.69837
0.48	6.76078	6.79775	6.85226	6.76213	6.76533
0.49	6.8287	6.86449	6.9158	6.82913	6.83128
0.5	6.89564	6.9301	6.9779	6.89513	6.89608
0.51	6.90411	6.93	6.9619	6.90234	6.87656
0.52	6.9178	6.9349	6.94979	6.91463	6.8608
0.53	6.93563	6.94395	6.94117	6.93099	6.8486
0.54	6.95665	6.95634	6.93565	6.95048	6.83963
0.55	6.98001	6.97135	6.93281	6.97228	6.83357
0.56	7.005	6.98834	6.93226	6.9957	6.83009
0.57	7.03105	7.00675	6.93364	7.02019	6.82885
0.58	7.0577	7.02613	6.9366	7.04528	6.82954
0.59	7.08456	7.0461	6.94084	7.07059	6.83186
0.6	7.11134	7.06635	6.94609	7.09585	6.83555
0.61	7.1378	7.08663	6.95211	7.12081	6.84034
0.62	7.16375	7.10674	6.9587	7.14528	6.84603
0.63	7.18904	7.12651	6.96568	7.16912	6.85243
0.64	7.21356	7.14582	6.97292	7.19221	6.85936
0.65	7.2372	7.16457	6.98028	7.21446	6.86669
0.66	7.2599	7.18268	6.98765	7.23579	6.87429
0.67	7.2816	7.20007	6.99497	7.25617	6.88205
0.68	7.30225	7.21672	7.00215	7.27553	6.88989
0.69	7.32184	7.23257	7.00913	7.29387	6.89773
0.7	7.34034	7.24761	7.01587	7.31115	6.90551
0.71	7.35774	7.26181	7.02234	7.32738	6.91317
0.72	7.37404	7.27518	7.02849	7.34256	6.92068
0.73	7.38926	7.28771	7.03432	7.35668	6.92798
0.74	7.40339	7.29941	7.03979	7.36977	6.93507
0.75	7.41647	7.31028	7.0449	7.38185	6.9419
0.76	7.42852	7.32034	7.04965	7.39293	6.94846
0.77	7.43957	7.3296	7.05401	7.40304	6.95474
0.78	7.44964	7.33808	7.058	7.41223	6.96072
0.79	7.45878	7.3458	7.06161	7.42051	6.9664
0.8	7.46702	7.3528	7.06485	7.42793	6.97176
0.81	7.4744	7.35909	7.06772	7.43451	6.97681
0.82	7.48096	7.3647	7.07021	7.44031	6.98153
0.83	7.48674	7.36965	7.07235	7.44535	6.98594
0.84	7.49179	7.37399	7.07414	7.44968	6.99002
0.85	7.49613	7.37773	7.07558	7.45333	6.99379
0.86	7.49982	7.3809	7.07668	7.45634	6.99724
0.87	7.50288	7.38353	7.07746	7.45875	7.00038
0.88	7.50537	7.38565	7.07793	7.46059	7.00321
0.89	7.50731	7.38728	7.07808	7.4619	7.00574
0.9	7.50875	7.38846	7.07794	7.46271	7.00797
0.91	7.5097	7.3892	7.07752	7.46305	7.00992
0.92	7.51022	7.38954	7.07682	7.46296	7.01157
0.93	7.51032	7.38949	7.07585	7.46245	7.01296
0.94	7.51004	7.38908	7.07463	7.46157	7.01406
0.95	7.5094	7.38834	7.07316	7.46034	7.01491
0.96	7.50843	7.38728	7.07145	7.45877	7.0155
0.97	7.50716	7.38592	7.06952	7.4569	7.01584
0.98	7.5056	7.38428	7.06738	7.45475	7.01594
0.99	7.50378	7.38239	7.06502	7.45233	7.01581
1	7.50171	7.38025	7.06247	7.44967	7.01545
1.01	7.49942	7.37788	7.05973	7.44678	7.01487
1.02	7.49693	7.37531	7.05681	7.44368	7.01408
1.03	7.49424	7.37253	7.05372	7.44039	7.01308
1.04	7.49137	7.36958	7.05046	7.43692	7.01189
1.05	7.48835	7.36645	7.04705	7.43328	7.01051
1.06	7.48517	7.36317	7.04349	7.42948	7.00894
1.07	7.48186	7.35973	7.03978	7.42555	7.0072
1.08	7.47841	7.35616	7.03594	7.42148	7.00529
1.09	7.47485	7.35247	7.03198	7.41729	7.00322
1.1	7.47118	7.34865	7.02789	7.41299	7.00099
1.11	7.46742	7.34473	7.02368	7.40859	6.99861
1.12	7.46356	7.3407	7.01937	7.40409	6.99608
1.13	7.45961	7.33658	7.01494	7.3995	6.99342
1.14	7.45559	7.33237	7.01043	7.39483	6.99062
1.15	7.4515	7.32808	7.00581	7.39009	6.9877
1.16	7.44734	7.32371	7.00111	7.38527	6.98466
1.17	7.44313	7.31928	6.99632	7.3804	6.9815
1.18	7.43885	7.31478	6.99145	7.37546	6.97823
1.19	7.43453	7.31022	6.98651	7.37047	6.97485
1.2	7.43016	7.3056	6.98149	7.36543	6.97137
1.21	7.42574	7.30093	6.97641	7.36035	6.9678
1.22	7.42129	7.29622	6.97126	7.35522	6.96413
1.23	7.4168	7.29146	6.96605	7.35005	6.96037
1.24	7.41228	7.28667	6.96078	7.34485	6.95652
1.25	7.40773	7.28183	6.95545	7.33962	6.9526
1.26	7.40314	7.27696	6.95008	7.33435	6.9486
1.27	7.39854	7.27206	6.94465	7.32905	6.94452
1.28	7.39391	7.26713	6.93918	7.32373	6.94038
1.29	7.38925	7.26217	6.93366	7.31839	6.93616
1.3	7.38458	7.25718	6.92811	7.31302	6.93189
1.31	7.37989	7.25217	6.92251	7.30764	6.92755
1.32	7.37518	7.24714	6.91688	7.30223	6.92315
1.33	7.37046	7.24209	6.91121	7.29681	6.9187
1.34	7.36572	7.23703	6.9055	7.29137	6.91419
1.35	7.36097	7.23194	6.89977	7.28592	6.90964
1.36	7.35621	7.22684	6.89401	7.28046	6.90503
1.37	7.35144	7.22173	6.88821	7.27498	6.90038
1.38	7.34666	7.2166	6.88239	7.26949	6.89569
1.39	7.34186	7.21146	6.87655	7.26399	6.89096
1.4	7.33706	7.2063	6.87068	7.25848	6.88618
1.41	7.33226	7.20114	6.86479	7.25296	6.88137
1.42	7.32744	7.19597	6.85888	7.24744	6.87652
1.43	7.32262	7.19079	6.85294	7.2419	6.87164
1.44	7.31779	7.1856	6.84699	7.23636	6.86673
1.45	7.31296	7.1804	6.84102	7.23082	6.86178
1.46	7.30812	7.17519	6.83503	7.22526	6.85681
1.47	7.30328	7.16998	6.82903	7.21971	6.8518
1.48	7.29843	7.16476	6.82301	7.21414	6.84677
1.49	7.29358	7.15954	6.81698	7.20858	6.84172
1.5	7.28872	7.15431	6.81093	7.203	6.83664
1.51	7.28386	7.14908	6.80487	7.19743	6.83154
1.52	7.279	7.14384	6.7988	7.19185	6.82641
1.53	7.27414	7.1386	6.79271	7.18627	6.82127
1.54	7.26927	7.13336	6.78662	7.18068	6.8161
1.55	7.26441	7.12811	6.78051	7.1751	6.81091
1.56	7.25953	7.12286	6.7744	7.16951	6.80571
1.57	7.25466	7.1176	6.76827	7.16391	6.80049
1.58	7.24979	7.11234	6.76214	7.15832	6.79525
1.59	7.24491	7.10708	6.75599	7.15272	6.79
1.6	7.24003	7.10182	6.74984	7.14712	6.78473
1.61	7.23516	7.09656	6.74368	7.14152	6.77945
1.62	7.23028	7.09129	6.73752	7.13592	6.77416
1.63	7.22539	7.08602	6.73135	7.13032	6.76885
1.64	7.22051	7.08075	6.72517	7.12472	6.76353
1.65	7.21563	7.07548	6.71898	7.11911	6.75819
1.66	7.21074	7.07021	6.71279	7.1135	6.75285
1.67	7.20586	7.06494	6.70659	7.1079	6.7475
1.68	7.20097	7.05966	6.70039	7.10229	6.74213
1.69	7.19609	7.05439	6.69419	7.09668	6.73676
1.7	7.1912	7.04911	6.68797	7.09107	6.73137
1.71	7.18631	7.04383	6.68176	7.08546	6.72598
1.72	7.18142	7.03855	6.67554	7.07985	6.72058
1.73	7.17653	7.03327	6.66931	7.07423	6.71517
1.74	7.17165	7.02799	6.66308	7.06862	6.70975
1.75	7.16676	7.02271	6.65685	7.06301	6.70432
1.76	7.16187	7.01743	6.65061	7.05739	6.69889
1.77	7.15698	7.01214	6.64438	7.05178	6.69345
1.78	7.15209	7.00686	6.63813	7.04617	6.68801
1.79	7.14719	7.00158	6.63189	7.04055	6.68256
1.8	7.1423	6.99629	6.62564	7.03494	6.6771
1.81	7.13741	6.99101	6.61939	7.02932	6.67164
1.82	7.13252	6.98572	6.61313	7.02371	6.66617
1.83	7.12763	6.98044	6.60688	7.01809	6.66069
1.84	7.12274	6.97515	6.60062	7.01247	6.65521
1.85	7.11784	6.96987	6.59435	7.00686	6.64973
1.86	7.11295	6.96458	6.58809	7.00124	6.64424
1.87	7.10806	6.95929	6.58183	6.99562	6.63875
1.88	7.10317	6.95401	6.57556	6.99001	6.63325
1.89	7.09827	6.94872	6.56929	6.98439	6.62775
1.9	7.09338	6.94343	6.56302	6.97877	6.62225
1.91	7.08849	6.93814	6.55674	6.97315	6.61674
1.92	7.0836	6.93286	6.55047	6.96754	6.61123
1.93	7.0787	6.92757	6.54419	6.96192	6.60571
1.94	7.07381	6.92228	6.53791	6.9563	6.60019
1.95	7.06892	6.91699	6.53163	6.95068	6.59467
1.96	7.06402	6.9117	6.52535	6.94506	6.58914
1.97	7.05913	6.90641	6.51907	6.93945	6.58362
1.98	7.05424	6.90113	6.51279	6.93383	6.57808
1.99	7.04934	6.89584	6.5065	6.92821	6.57255
2	7.04445	6.89055	6.50021	6.92259	6.56702
2.01	7.03955	6.88526	6.49393	6.91697	6.56148
2.02	7.03466	6.87997	6.48764	6.91135	6.55594
2.03	7.02977	6.87468	6.48135	6.90574	6.55039
2.04	7.02487	6.86939	6.47506	6.90012	6.54485
2.05	7.01998	6.8641	6.46877	6.8945	6.5393
2.06	7.01509	6.85881	6.46247	6.88888	6.53375
2.07	7.01019	6.85352	6.45618	6.88326	6.5282
2.08	7.0053	6.84823	6.44988	6.87764	6.52264
2.09	7.0004	6.84295	6.44359	6.87202	6.51709
2.1	6.99551	6.83766	6.43729	6.86641	6.51153
2.11	6.99062	6.83237	6.431	6.86079	6.50597
2.12	6.98572	6.82708	6.4247	6.85517	6.50041
2.13	6.98083	6.82179	6.4184	6.84955	6.49485
2.14	6.97594	6.8165	6.4121	6.84393	6.48929
2.15	6.97104	6.81121	6.4058	6.83831	6.48372
2.16	6.96615	6.80592	6.3995	6.83269	6.47815
2.17	6.96125	6.80063	6.3932	6.82707	6.47259
2.18	6.95636	6.79534	6.3869	6.82145	6.46702
2.19	6.95147	6.79005	6.38059	6.81584	6.46145
2.2	6.94657	6.78476	6.37429	6.81022	6.45587
2.21	6.94168	6.77947	6.36799	6.8046	6.4503
2.22	6.93678	6.77418	6.36168	6.79898	6.44473
2.23	6.93189	6.76889	6.35538	6.79336	6.43915
2.24	6.927	6.7636	6.34907	6.78774	6.43358
2.25	6.9221	6.75831	6.34277	6.78212	6.428
2.26	6.91721	6.75302	6.33646	6.7765	6.42242
2.27	6.91231	6.74773	6.33016	6.77088	6.41684
2.28	6.90742	6.74244	6.32385	6.76526	6.41126
2.29	6.90253	6.73715	6.31754	6.75964	6.40568
2.3	6.89763	6.73186	6.31123	6.75403	6.4001
2.31	6.89274	6.72657	6.30493	6.74841	6.39451
2.32	6.88784	6.72128	6.29862	6.74279	6.38893
2.33	6.88295	6.71599	6.29231	6.73717	6.38334
2.34	6.87805	6.7107	6.286	6.73155	6.37776
2.35	6.87316	6.70541	6.27969	6.72593	6.37217
2.36	6.86827	6.70012	6.27338	6.72031	6.36658
2.37	6.86337	6.69483	6.26707	6.71469	6.36099
2.38	6.85848	6.68954	6.26076	6.70907	6.35541
2.39	6.85358	6.68425	6.25445	6.70345	6.34982
2.4	6.84869	6.67896	6.24814	6.69783	6.34423
2.41	6.8438	6.67366	6.24183	6.69222	6.33864
2.42	6.8389	6.66837	6.23551	6.6866	6.33304
2.43	6.83401	6.66308	6.2292	6.68098	6.32745
2.44	6.82911	6.65779	6.22289	6.67536	6.32186
2.45	6.82422	6.6525	6.21658	6.66974	6.31627
2.46	6.81933	6.64721	6.21026	6.66412	6.31067
2.47	6.81443	6.64192	6.20395	6.6585	6.30508
2.48	6.80954	6.63663	6.19764	6.65288	6.29948
2.49	6.80464	6.63134	6.19132	6.64726	6.29389
2.5	6.79975	6.62605	6.18501	6.64164	6.28829
2.51	6.79486	6.62076	6.1787	6.63602	6.2827
2.52	6.78996	6.61547	6.17238	6.6304	6.2771
2.53	6.78507	6.61018	6.16607	6.62479	6.2715
2.54	6.78017	6.60489	6.15975	6.61917	6.2659
2.55	6.77528	6.5996	6.15344	6.61355	6.2603
2.56	6.77038	6.59431	6.14712	6.60793	6.25471
2.57	6.76549	6.58902	6.14081	6.60231	6.24911
2.58	6.7606	6.58373	6.13449	6.59669	6.24351
2.59	6.7557	6.57844	6.12818	6.59107	6.23791
2.6	6.75081	6.57315	6.12186	6.58545	6.23231
2.61	6.74591	6.56786	6.11554	6.57983	6.22671
2.62	6.74102	6.56257	6.10923	6.57421	6.22111
2.63	6.73613	6.55728	6.10291	6.56859	6.2155
2.64	6.73123	6.55199	6.0966	6.56297	6.2099
2.65	6.72634	6.5467	6.09028	6.55736	6.2043
2.66	6.72144	6.54141	6.08396	6.55174	6.1987
2.67	6.71655	6.53612	6.07765	6.54612	6.19309
2.68	6.71166	6.53083	6.07133	6.5405	6.18749
2.69	6.70676	6.52554	6.06501	6.53488	6.18189
2.7	6.70187	6.52025	6.05869	6.52926	6.17628
2.71	6.69697	6.51496	6.05238	6.52364	6.17068
2.72	6.69208	6.50967	6.04606	6.51802	6.16508
2.73	6.68719	6.50437	6.03974	6.5124	6.15947
2.74	6.68229	6.49908	6.03342	6.50678	6.15387
2.75	6.6774	6.49379	6.0271	6.50116	6.14826
2.76	6.6725	6.4885	6.02079	6.49554	6.14266
2.77	6.66761	6.48321	6.01447	6.48993	6.13705
2.78	6.66271	6.47792	6.00815	6.48431	6.13144
2.79	6.65782	6.47263	6.00183	6.47869	6.12584
2.8	6.65293	6.46734	5.99551	6.47307	6.12023
2.81	6.64803	6.46205	5.98919	6.46745	6.11462
2.82	6.64314	6.45676	5.98288	6.46183	6.10902
2.83	6.63824	6.45147	5.97656	6.45621	6.10341
2.84	6.63335	6.44618	5.97024	6.45059	6.0978
2.85	6.62846	6.44089	5.96392	6.44497	6.09219
2.86	6.62356	6.4356	5.9576	6.43935	6.08659
2.87	6.61867	6.43031	5.95128	6.43373	6.08098
2.88	6.61377	6.42502	5.94496	6.42811	6.07537
2.89	6.60888	6.41973	5.93864	6.4225	6.06976
2.9	6.60399	6.41444	5.93232	6.41688	6.06415
2.91	6.59909	6.40915	5.926	6.41126	6.05854
2.92	6.5942	6.40386	5.91968	6.40564	6.05294
2.93	6.5893	6.39857	5.91336	6.40002	6.04733
2.94	6.58441	6.39328	5.90704	6.3944	6.04172
2.95	6.57951	6.38799	5.90072	6.38878	6.03611
2.96	6.57462	6.3827	5.8944	6.38316	6.0305
2.97	6.56973	6.37741	5.88808	6.37754	6.02489
2.98	6.56483	6.37212	5.88176	6.37192	6.01928
2.99	6.55994	6.36683	5.87544	6.3663	6.01367
3	6.55504	6.36153	5.86912	6.36068	6.00806
3.01	6.55015	6.35624	5.8628	6.35506	6.00245
3.02	6.54526	6.35095	5.85648	6.34945	5.99684
3.03	6.54036	6.34566	5.85016	6.34383	5.99122
3.04	6.53547	6.34037	5.84384	6.33821	5.98561
3.05	6.53057	6.33508	5.83752	6.33259	5.98
3.06	6.52568	6.32979	5.8312	6.32697	5.97439
3.07	6.52079	6.3245	5.82488	6.32135	5.96878
3.08	6.51589	6.31921	5.81856	6.31573	5.96317
3.09	6.511	6.31392	5.81223	6.31011	5.95756
3.1	6.5061	6.30863	5.80591	6.30449	5.95194
3.11	6.50121	6.30334	5.79959	6.29887	5.94633
3.12	6.49631	6.29805	5.79327	6.29325	5.94072
3.13	6.49142	6.29276	5.78695	6.28763	5.93511
3.14	6.48653	6.28747	5.78063	6.28202	5.9295
3.15	6.48163	6.28218	5.77431	6.2764	5.92388
3.16	6.47674	6.27689	5.76799	6.27078	5.91827
3.17	6.47184	6.2716	5.76167	6.26516	5.91266
3.18	6.46695	6.26631	5.75534	6.25954	5.90704
3.19	6.46206	6.26102	5.74902	6.25392	5.90143
3.2	6.45716	6.25573	5.7427	6.2483	5.89582
3.21	6.45227	6.25044	5.73638	6.24268	5.89021
3.22	6.44737	6.24515	5.73006	6.23706	5.88459
3.23	6.44248	6.23986	5.72374	6.23144	5.87898
3.24	6.43759	6.23457	5.71741	6.22582	5.87337
3.25	6.43269	6.22927	5.71109	6.2202	5.86775
3.26	6.4278	6.22398	5.70477	6.21459	5.86214
3.27	6.4229	6.21869	5.69845	6.20897	5.85652
3.28	6.41801	6.2134	5.69213	6.20335	5.85091
3.29	6.41312	6.20811	5.6858	6.19773	5.8453
3.3	6.40822	6.20282	5.67948	6.19211	5.83968
3.31	6.40333	6.19753	5.67316	6.18649	5.83407
3.32	6.39843	6.19224	5.66684	6.18087	5.82845
3.33	6.39354	6.18695	5.66052	6.17525	5.82284
3.34	6.38864	6.18166	5.65419	6.16963	5.81723
3.35	6.38375	6.17637	5.64787	6.16401	5.81161
3.36	6.37886	6.17108	5.64155	6.15839	5.806
3.37	6.37396	6.16579	5.63523	6.15277	5.80038
3.38	6.36907	6.1605	5.62891	6.14715	5.79477
3.39	6.36417	6.15521	5.62258	6.14154	5.78915
3.4	6.35928	6.14992	5.61626	6.13592	5.78354
3.41	6.35439	6.14463	5.60994	6.1303	5.77792
3.42	6.34949	6.13934	5.60362	6.12468	5.77231
3.43	6.3446	6.13405	5.59729	6.11906	5.76669
3.44	6.3397	6.12876	5.59097	6.11344	5.76108
3.45	6.33481	6.12347	5.58465	6.10782	5.75546
3.46	6.32992	6.11818	5.57833	6.1022	5.74985
3.47	6.32502	6.11289	5.572	6.09658	5.74423
3.48	6.32013	6.1076	5.56568	6.09096	5.73862
3.49	6.31523	6.10231	5.55936	6.08534	5.733
3.5	6.31034	6.09701	5.55304	6.07972	5.72738
3.51	6.30544	6.09172	5.54671	6.07411	5.72177
3.52	6.30055	6.08643	5.54039	6.06849	5.71615
3.53	6.29566	6.08114	5.53407	6.06287	5.71054
3.54	6.29076	6.07585	5.52774	6.05725	5.70492
3.55	6.28587	6.07056	5.52142	6.05163	5.69931
3.56	6.28097	6.06527	5.5151	6.04601	5.69369
3.57	6.27608	6.05998	5.50878	6.04039	5.68807
3.58	6.27119	6.05469	5.50245	6.03477	5.68246
3.59	6.26629	6.0494	5.49613	6.02915	5.67684
3.6	6.2614	6.04411	5.48981	6.02353	5.67122
3.61	6.2565	6.03882	5.48348	6.01791	5.66561
3.62	6.25161	6.03353	5.47716	6.01229	5.65999
3.63	6.24672	6.02824	5.47084	6.00667	5.65438
3.64	6.24182	6.02295	5.46452	6.00106	5.64876
3.65	6.23693	6.01766	5.45819	5.99544	5.64314
3.66	6.23203	6.01237	5.45187	5.98982	5.63753
3.67	6.22714	6.00708	5.44555	5.9842	5.63191
3.68	6.22224	6.00179	5.43922	5.97858	5.62629
3.69	6.21735	5.9965	5.4329	5.97296	5.62068
3.7	6.21246	5.99121	5.42658	5.96734	5.61506
3.71	6.20756	5.98592	5.42025	5.96172	5.60944
3.72	6.20267	5.98063	5.41393	5.9561	5.60383
3.73	6.19777	5.97534	5.40761	5.95048	5.59821
3.74	6.19288	5.97004	5.40128	5.94486	5.59259
3.75	6.18799	5.96475	5.39496	5.93924	5.58698
3.76	6.18309	5.95946	5.38864	5.93363	5.58136
3.77	6.1782	5.95417	5.38231	5.92801	5.57574
3.78	6.1733	5.94888	5.37599	5.92239	5.57013
3.79	6.16841	5.94359	5.36967	5.91677	5.56451
3.8	6.16352	5.9383	5.36334	5.91115	5.55889
3.81	6.15862	5.93301	5.35702	5.90553	5.55327
3.82	6.15373	5.92772	5.3507	5.89991	5.54766
3.83	6.14883	5.92243	5.34437	5.89429	5.54204
3.84	6.14394	5.91714	5.33805	5.88867	5.53642
3.85	6.13905	5.91185	5.33173	5.88305	5.53081
3.86	6.13415	5.90656	5.3254	5.87743	5.52519
3.87	6.12926	5.90127	5.31908	5.87181	5.51957
3.88	6.12436	5.89598	5.31276	5.86619	5.51395
3.89	6.11947	5.89069	5.30643	5.86058	5.50834
3.9	6.11457	5.8854	5.30011	5.85496	5.50272
3.91	6.10968	5.88011	5.29379	5.84934	5.4971
3.92	6.10479	5.87482	5.28746	5.84372	5.49148
3.93	6.09989	5.86953	5.28114	5.8381	5.48587
3.94	6.095	5.86424	5.27482	5.83248	5.48025
3.95	6.0901	5.85895	5.26849	5.82686	5.47463
3.96	6.08521	5.85366	5.26217	5.82124	5.46901
3.97	6.08032	5.84837	5.25585	5.81562	5.46339
3.98	6.07542	5.84307	5.24952	5.81	5.45778
3.99	6.07053	5.83778	5.2432	5.80438	5.45216
4	6.06563	5.83249	5.23687	5.79876	5.44654
4.01	6.06074	5.8272	5.23055	5.79315	5.44092
4.02	6.05585	5.82191	5.22423	5.78753	5.43531
4.03	6.05095	5.81662	5.2179	5.78191	5.42969
4.04	6.04606	5.81133	5.21158	5.77629	5.42407
4.05	6.04116	5.80604	5.20526	5.77067	5.41845
4.06	6.03627	5.80075	5.19893	5.76505	5.41283
4.07	6.03137	5.79546	5.19261	5.75943	5.40722
4.08	6.02648	5.79017	5.18629	5.75381	5.4016
4.09	6.02159	5.78488	5.17996	5.74819	5.39598
4.1	6.01669	5.77959	5.17364	5.74257	5.39036
4.11	6.0118	5.7743	5.16731	5.73695	5.38474
4.12	6.0069	5.76901	5.16099	5.73133	5.37913
4.13	6.00201	5.76372	5.15467	5.72571	5.37351
4.14	5.99712	5.75843	5.14834	5.7201	5.36789
4.15	5.99222	5.75314	5.14202	5.71448	5.36227
4.16	5.98733	5.74785	5.1357	5.70886	5.35665
4.17	5.98243	5.74256	5.12937	5.70324	5.35103
4.18	5.97754	5.73727	5.12305	5.69762	5.34542
4.19	5.97265	5.73198	5.11672	5.692	5.3398
4.2	5.96775	5.72669	5.1104	5.68638	5.33418
4.21	5.96286	5.72139	5.10408	5.68076	5.32856
4.22	5.95796	5.7161	5.09775	5.67514	5.32294
4.23	5.95307	5.71081	5.09143	5.66952	5.31733
4.24	5.94817	5.70552	5.0851	5.6639	5.31171
4.25	5.94328	5.70023	5.07878	5.65828	5.30609
4.26	5.93839	5.69494	5.07246	5.65267	5.30047
4.27	5.93349	5.68965	5.06613	5.64705	5.29485
4.28	5.9286	5.68436	5.05981	5.64143	5.28923
4.29	5.9237	5.67907	5.05349	5.63581	5.28361
4.3	5.91881	5.67378	5.04716	5.63019	5.278
4.31	5.91392	5.66849	5.04084	5.62457	5.27238
4.32	5.90902	5.6632	5.03451	5.61895	5.26676
4.33	5.90413	5.65791	5.02819	5.61333	5.26114
4.34	5.89923	5.65262	5.02187	5.60771	5.25552
4.35	5.89434	5.64733	5.01554	5.60209	5.2499
4.36	5.88945	5.64204	5.00922	5.59647	5.24428
4.37	5.88455	5.63675	5.00289	5.59085	5.23867
4.38	5.87966	5.63146	4.99657	5.58523	5.23305
4.39	5.87476	5.62617	4.99025	5.57962	5.22743
4.4	5.86987	5.62088	4.98392	5.574	5.22181
4.41	5.86498	5.61559	4.9776	5.56838	5.21619
4.42	5.86008	5.6103	4.97127	5.56276	5.21057
4.43	5.85519	5.60501	4.96495	5.55714	5.20495
4.44	5.85029	5.59972	4.95863	5.55152	5.19934
4.45	5.8454	5.59442	4.9523	5.5459	5.19372
4.46	5.8405	5.58913	4.94598	5.54028	5.1881
4.47	5.83561	5.58384	4.93965	5.53466	5.18248
4.48	5.83072	5.57855	4.93333	5.52904	5.17686
4.49	5.82582	5.57326	4.92701	5.52342	5.17124
4.5	5.82093	5.56797	4.92068	5.5178	5.16562
4.51	5.81603	5.56268	4.91436	5.51219	5.16
4.52	5.81114	5.55739	4.90803	5.50657	5.15438
4.53	5.80625	5.5521	4.90171	5.50095	5.14877
4.54	5.80135	5.54681	4.89539	5.49533	5.14315
4.55	5.79646	5.54152	4.88906	5.48971	5.13753
4.56	5.79156	5.53623	4.88274	5.48409	5.13191
4.57	5.78667	5.53094	4.87641	5.47847	5.12629
4.58	5.78178	5.52565	4.87009	5.47285	5.12067
4.59	5.77688	5.52036	4.86376	5.46723	5.11505
4.6	5.77199	5.51507	4.85744	5.46161	5.10943
4.61	5.76709	5.50978	4.85112	5.45599	5.10381
4.62	5.7622	5.50449	4.84479	5.45037	5.0982
4.63	5.7573	5.4992	4.83847	5.44475	5.09258
4.64	5.75241	5.49391	4.83214	5.43914	5.08696
4.65	5.74752	5.48862	4.82582	5.43352	5.08134
4.66	5.74262	5.48333	4.8195	5.4279	5.07572
4.67	5.73773	5.47804	4.81317	5.42228	5.0701
4.68	5.73283	5.47275	4.80685	5.41666	5.06448
4.69	5.72794	5.46745	4.80052	5.41104	5.05886
4.7	5.72305	5.46216	4.7942	5.40542	5.05324
4.71	5.71815	5.45687	4.78788	5.3998	5.04762
4.72	5.71326	5.45158	4.78155	5.39418	5.042
4.73	5.70836	5.44629	4.77523	5.38856	5.03639
4.74	5.70347	5.441	4.7689	5.38294	5.03077
4.75	5.69858	5.43571	4.76258	5.37732	5.02515
4.76	5.69368	5.43042	4.75625	5.37171	5.01953
4.77	5.68879	5.42513	4.74993	5.36609	5.01391
4.78	5.68389	5.41984	4.74361	5.36047	5.00829
4.79	5.679	5.41455	4.73728	5.35485	5.00267
4.8	5.6741	5.40926	4.73096	5.34923	4.99705
4.81	5.66921	5.40397	4.72463	5.34361	4.99143
4.82	5.66432	5.39868	4.71831	5.33799	4.98581
4.83	5.65942	5.39339	4.71199	5.33237	4.98019
4.84	5.65453	5.3881	4.70566	5.32675	4.97457
4.85	5.64963	5.38281	4.69934	5.32113	4.96896
4.86	5.64474	5.37752	4.69301	5.31551	4.96334
4.87	5.63985	5.37223	4.68669	5.30989	4.95772
4.88	5.63495	5.36694	4.68036	5.30427	4.9521
4.89	5.63006	5.36165	4.67404	5.29866	4.94648
4.9	5.62516	5.35636	4.66772	5.29304	4.94086
4.91	5.62027	5.35107	4.66139	5.28742	4.93524
4.92	5.61538	5.34577	4.65507	5.2818	4.92962
4.93	5.61048	5.34048	4.64874	5.27618	4.924
4.94	5.60559	5.33519	4.64242	5.27056	4.91838
4.95	5.60069	5.3299	4.63609	5.26494	4.91276
4.96	5.5958	5.32461	4.62977	5.25932	4.90714
4.97	5.59091	5.31932	4.62345	5.2537	4.90152
4.98	5.58601	5.31403	4.61712	5.24808	4.8959
4.99	5.58112	5.30874	4.6108	5.24246	4.89029
5	5.57622	5.30345	4.60447	5.23684	4.88467
5.01	5.57133	5.29816	4.59815	5.23123	4.87905
5.02	5.56643	5.29287	4.59182	5.22561	4.87343
5.03	5.56154	5.28758	4.5855	5.21999	4.86781
5.04	5.55665	5.28229	4.57918	5.21437	4.86219
5.05	5.55175	5.277	4.57285	5.20875	4.85657
5.06	5.54686	5.27171	4.56653	5.20313	4.85095
5.07	5.54196	5.26642	4.5602	5.19751	4.84533
5.08	5.53707	5.26113	4.55388	5.19189	4.83971
5.09	5.53218	5.25584	4.54756	5.18627	4.83409
5.1	5.52728	5.25055	4.54123	5.18065	4.82847
5.11	5.52239	5.24526	4.53491	5.17503	4.82285
5.12	5.51749	5.23997	4.52858	5.16941	4.81723
5.13	5.5126	5.23468	4.52226	5.16379	4.81161
5.14	5.50771	5.22939	4.51593	5.15818	4.80599
5.15	5.50281	5.2241	4.50961	5.15256	4.80037
5.16	5.49792	5.2188	4.50329	5.14694	4.79476
5.17	5.49302	5.21351	4.49696	5.14132	4.78914
5.18	5.48813	5.20822	4.49064	5.1357	4.78352
5.19	5.48323	5.20293	4.48431	5.13008	4.7779
5.2	5.47834	5.19764	4.47799	5.12446	4.77228
5.21	5.47345	5.19235	4.47166	5.11884	4.76666
5.22	5.46855	5.18706	4.46534	5.11322	4.76104
5.23	5.46366	5.18177	4.45902	5.1076	4.75542
5.24	5.45876	5.17648	4.45269	5.10198	4.7498
5.25	5.45387	5.17119	4.44637	5.09636	4.74418
5.26	5.44898	5.1659	4.44004	5.09075	4.73856
5.27	5.44408	5.16061	4.43372	5.08513	4.73294
5.28	5.43919	5.15532	4.42739	5.07951	4.72732
5.29	5.43429	5.15003	4.42107	5.07389	4.7217
5.3	5.4294	5.14474	4.41475	5.06827	4.71608
5.31	5.42451	5.13945	4.40842	5.06265	4.71046
5.32	5.41961	5.13416	4.4021	5.05703	4.70484
5.33	5.41472	5.12887	4.39577	5.05141	4.69922
5.34	5.40982	5.12358	4.38945	5.04579	4.6936
5.35	5.40493	5.11829	4.38312	5.04017	4.68798
5.36	5.40003	5.113	4.3768	5.03455	4.68237
5.37	5.39514	5.10771	4.37047	5.02893	4.67675
5.38	5.39025	5.10242	4.36415	5.02331	4.67113
5.39	5.38535	5.09712	4.35783	5.0177	4.66551
5.4	5.38046	5.09183	4.3515	5.01208	4.65989
5.41	5.37556	5.08654	4.34518	5.00646	4.65427
5.42	5.37067	5.08125	4.33885	5.00084	4.64865
5.43	5.36578	5.07596	4.33253	4.99522	4.64303
5.44	5.36088	5.07067	4.3262	4.9896	4.63741
5.45	5.35599	5.06538	4.31988	4.98398	4.63179
5.46	5.35109	5.06009	4.31356	4.97836	4.62617
5.47	5.3462	5.0548	4.30723	4.97274	4.62055
5.48	5.34131	5.04951	4.30091	4.96712	4.61493
5.49	5.33641	5.04422	4.29458	4.9615	4.60931
5.5	5.33152	5.03893	4.28826	4.95588	4.60369
5.51	5.32662	5.03364	4.28193	4.95027	4.59807
5.52	5.32173	5.02835	4.27561	4.94465	4.59245
5.53	5.31684	5.02306	4.26929	4.93903	4.58683
5.54	5.31194	5.01777	4.26296	4.93341	4.58121
5.55	5.30705	5.01248	4.25664	4.92779	4.57559
5.56	5.30215	5.00719	4.25031	4.92217	4.56997
5.57	5.29726	5.0019	4.24399	4.91655	4.56435
5.58	5.29236	4.99661	4.23766	4.91093	4.55873
5.59	5.28747	4.99132	4.23134	4.90531	4.55311
5.6	5.28258	4.98603	4.22501	4.89969	4.54749
5.61	5.27768	4.98074	4.21869	4.89407	4.54187
5.62	5.27279	4.97545	4.21237	4.88845	4.53626
5.63	5.26789	4.97015	4.20604	4.88283	4.53064
5.64	5.263	4.96486	4.19972	4.87722	4.52502
5.65	5.25811	4.95957	4.19339	4.8716	4.5194
5.66	5.25321	4.95428	4.18707	4.86598	4.51378
5.67	5.24832	4.94899	4.18074	4.86036	4.50816
5.68	5.24342	4.9437	4.17442	4.85474	4.50254
5.69	5.23853	4.93841	4.1681	4.84912	4.49692
5.7	5.23364	4.93312	4.16177	4.8435	4.4913
5.71	5.22874	4.92783	4.15545	4.83788	4.48568
5.72	5.22385	4.92254	4.14912	4.83226	4.48006
5.73	5.21895	4.91725	4.1428	4.82664	4.47444
5.74	5.21406	4.91196	4.13647	4.82102	4.46882
5.75	5.20916	4.90667	4.13015	4.8154	4.4632
5.76	5.20427	4.90138	4.12383	4.80979	4.45758
5.77	5.19938	4.89609	4.1175	4.80417	4.45196
5.78	5.19448	4.8908	4.11118	4.79855	4.44634
5.79	5.18959	4.88551	4.10485	4.79293	4.44072
5.8	5.18469	4.88022	4.09853	4.78731	4.4351
5.81	5.1798	4.87493	4.0922	4.78169	4.42948
5.82	5.17491	4.86964	4.08588	4.77607	4.42386
5.83	5.17001	4.86435	4.07955	4.77045	4.41824
5.84	5.16512	4.85906	4.07323	4.76483	4.41262
5.85	5.16022	4.85377	4.06691	4.75921	4.407
5.86	5.15533	4.84847	4.06058	4.75359	4.40138
5.87	5.15044	4.84318	4.05426	4.74797	4.39576
5.88	5.14554	4.83789	4.04793	4.74235	4.39014
5.89	5.14065	4.8326	4.04161	4.73674	4.38452
5.9	5.13575	4.82731	4.03528	4.73112	4.3789
5.91	5.13086	4.82202	4.02896	4.7255	4.37328
5.92	5.12596	4.81673	4.02264	4.71988	4.36766
5.93	5.12107	4.81144	4.01631	4.71426	4.36204
5.94	5.11618	4.80615	4.00999	4.70864	4.35642
5.95	5.11128	4.80086	4.00366	4.70302	4.3508
5.96	5.10639	4.79557	3.99734	4.6974	4.34519
5.97	5.10149	4.79028	3.99101	4.69178	4.33957
5.98	5.0966	4.78499	3.98469	4.68616	4.33395
5.99	5.09171	4.7797	3.97836	4.68054	4.32833
6	5.08681	4.77441	3.97204	4.67492	4.32271
6.01	5.08192	4.76912	3.96572	4.66931	4.31709
6.02	5.07702	4.76383	3.95939	4.66369	4.31147
6.03	5.07213	4.75854	3.95307	4.65807	4.30585
6.04	5.06724	4.75325	3.94674	4.65245	4.30023
6.05	5.06234	4.74796	3.94042	4.64683	4.29461
6.06	5.05745	4.74267	3.93409	4.64121	4.28899
6.07	5.05255	4.73738	3.92777	4.63559	4.28337
6.08	5.04766	4.73209	3.92144	4.62997	4.27775
6.09	5.04277	4.72679	3.91512	4.62435	4.27213
6.1	5.03787	4.7215	3.9088	4.61873	4.26651
6.11	5.03298	4.71621	3.90247	4.61311	4.26089
6.12	5.02808	4.71092	3.89615	4.60749	4.25527
6.13	5.02319	4.70563	3.88982	4.60187	4.24965
6.14	5.01829	4.70034	3.8835	4.59626	4.24403
6.15	5.0134	4.69505	3.87717	4.59064	4.23841
6.16	5.00851	4.68976	3.87085	4.58502	4.23279
6.17	5.00361	4.68447	3.86453	4.5794	4.22717
6.18	4.99872	4.67918	3.8582	4.57378	4.22155
6.19	4.99382	4.67389	3.85188	4.56816	4.21593
6.2	4.98893	4.6686	3.84555	4.56254	4.21031
6.21	4.98404	4.66331	3.83923	4.55692	4.20469
6.22	4.97914	4.65802	3.8329	4.5513	4.19907
6.23	4.97425	4.65273	3.82658	4.54568	4.19345
6.24	4.96935	4.64744	3.82025	4.54006	4.18783
6.25	4.96446	4.64215	3.81393	4.53444	4.18221
6.26	4.95957	4.63686	3.80761	4.52883	4.17659
6.27	4.95467	4.63157	3.80128	4.52321	4.17097
6.28	4.94978	4.62628	3.79496	4.51759	4.16535
6.29	4.94488	4.62099	3.78863	4.51197	4.15973
6.3	4.93999	4.6157	3.78231	4.50635	4.15411
6.31	4.93509	4.61041	3.77598	4.50073	4.14849
6.32	4.9302	4.60512	3.76966	4.49511	4.14287
6.33	4.92531	4.59982	3.76333	4.48949	4.13725
6.34	4.92041	4.59453	3.75701	4.48387	4.13163
6.35	4.91552	4.58924	3.75069	4.47825	4.12601
6.36	4.91062	4.58395	3.74436	4.47263	4.12039
6.37	4.90573	4.57866	3.73804	4.46701	4.11477
6.38	4.90084	4.57337	3.73171	4.46139	4.10915
6.39	4.89594	4.56808	3.72539	4.45578	4.10353
6.4	4.89105	4.56279	3.71906	4.45016	4.09791
6.41	4.88615	4.5575	3.71274	4.44454	4.09229
6.42	4.88126	4.55221	3.70642	4.43892	4.08668
6.43	4.87637	4.54692	3.70009	4.4333	4.08106
6.44	4.87147	4.54163	3.69377	4.42768	4.07544
6.45	4.86658	4.53634	3.68744	4.42206	4.06982
6.46	4.86168	4.53105	3.68112	4.41644	4.0642
6.47	4.85679	4.52576	3.67479	4.41082	4.05858
6.48	4.85189	4.52047	3.66847	4.4052	4.05296
6.49	4.847	4.51518	3.66214	4.39958	4.04734
6.5	4.84211	4.50989	3.65582	4.39396	4.04172
6.51	4.83721	4.5046	3.6495	4.38835	4.0361
6.52	4.83232	4.49931	3.64317	4.38273	4.03048
6.53	4.82742	4.49402	3.63685	4.37711	4.02486
6.54	4.82253	4.48873	3.63052	4.37149	4.01924
6.55	4.81764	4.48344	3.6242	4.36587	4.01362
6.56	4.81274	4.47814	3.61787	4.36025	4.008
6.57	4.80785	4.47285	3.61155	4.35463	4.00238
6.58	4.80295	4.46756	3.60522	4.34901	3.99676
6.59	4.79806	4.46227	3.5989	4.34339	3.99114
6.6	4.79317	4.45698	3.59258	4.33777	3.98552
6.61	4.78827	4.45169	3.58625	4.33215	3.9799
6.62	4.78338	4.4464	3.57993	4.32653	3.97428
6.63	4.77848	4.44111	3.5736	4.32091	3.96866
6.64	4.77359	4.43582	3.56728	4.3153	3.96304
6.65	4.7687	4.43053	3.56095	4.30968	3.95742
6.66	4.7638	4.42524	3.55463	4.30406	3.9518
6.67	4.75891	4.41995	3.54831	4.29844	3.94618
6.68	4.75401	4.41466	3.54198	4.29282	3.94056
6.69	4.74912	4.40937	3.53566	4.2872	3.93494
6.7	4.74422	4.40408	3.52933	4.28158	3.92932
6.71	4.73933	4.39879	3.52301	4.27596	3.9237
6.72	4.73444	4.3935	3.51668	4.27034	3.91808
6.73	4.72954	4.38821	3.51036	4.26472	3.91246
6.74	4.72465	4.38292	3.50403	4.2591	3.90684
6.75	4.71975	4.37763	3.49771	4.25348	3.90122
6.76	4.71486	4.37234	3.49139	4.24787	3.8956
6.77	4.70997	4.36705	3.48506	4.24225	3.88998
6.78	4.70507	4.36176	3.47874	4.23663	3.88436
6.79	4.70018	4.35647	3.47241	4.23101	3.87874
6.8	4.69528	4.35117	3.46609	4.22539	3.87312
6.81	4.69039	4.34588	3.45976	4.21977	3.8675
6.82	4.6855	4.34059	3.45344	4.21415	3.86188
6.83	4.6806	4.3353	3.44711	4.20853	3.85626
6.84	4.67571	4.33001	3.44079	4.20291	3.85064
6.85	4.67081	4.32472	3.43447	4.19729	3.84502
6.86	4.66592	4.31943	3.42814	4.19167	3.8394
6.87	4.66102	4.31414	3.42182	4.18605	3.83378
6.88	4.65613	4.30885	3.41549	4.18043	3.82816
6.89	4.65124	4.30356	3.40917	4.17482	3.82254
6.9	4.64634	4.29827	3.40284	4.1692	3.81692
6.91	4.64145	4.29298	3.39652	4.16358	3.8113
6.92	4.63655	4.28769	3.39019	4.15796	3.80568
6.93	4.63166	4.2824	3.38387	4.15234	3.80006
6.94	4.62677	4.27711	3.37755	4.14672	3.79444
6.95	4.62187	4.27182	3.37122	4.1411	3.78882
6.96	4.61698	4.26653	3.3649	4.13548	3.7832
6.97	4.61208	4.26124	3.35857	4.12986	3.77758
6.98	4.60719	4.25595	3.35225	4.12424	3.77196
6.99	4.6023	4.25066	3.34592	4.11862	3.76634
7	4.5974	4.24537	3.3396	4.113	3.76072
7.01	4.59251	4.24008	3.33327	4.10739	3.7551
7.02	4.58761	4.23479	3.32695	4.10177	3.74948
7.03	4.58272	4.22949	3.32063	4.09615	3.74386
7.04	4.57782	4.2242	3.3143	4.09053	3.73824
7.05	4.57293	4.21891	3.30798	4.08491	3.73262
7.06	4.56804	4.21362	3.30165	4.07929	3.72701
7.07	4.56314	4.20833	3.29533	4.07367	3.72139
7.08	4.55825	4.20304	3.289	4.06805	3.71577
7.09	4.55335	4.19775	3.28268	4.06243	3.71015
7.1	4.54846	4.19246	3.27636	4.05681	3.70453
7.11	4.54357	4.18717	3.27003	4.05119	3.69891
7.12	4.53867	4.18188	3.26371	4.04557	3.69329
7.13	4.53378	4.17659	3.25738	4.03995	3.68767
7.14	4.52888	4.1713	3.25106	4.03434	3.68205
7.15	4.52399	4.16601	3.24473	4.02872	3.67643
7.16	4.5191	4.16072	3.23841	4.0231	3.67081
7.17	4.5142	4.15543	3.23208	4.01748	3.66519
7.18	4.50931	4.15014	3.22576	4.01186	3.65957
7.19	4.50441	4.14485	3.21944	4.00624	3.65395
7.2	4.49952	4.13956	3.21311	4.00062	3.64833
7.21	4.49463	4.13427	3.20679	3.995	3.64271
7.22	4.48973	4.12898	3.20046	3.98938	3.63709
7.23	4.48484	4.12369	3.19414	3.98376	3.63147
7.24	4.47994	4.1184	3.18781	3.97814	3.62585
7.25	4.47505	4.11311	3.18149	3.97252	3.62023
7.26	4.47015	4.10782	3.17516	3.96691	3.61461
7.27	4.46526	4.10252	3.16884	3.96129	3.60899
7.28	4.46037	4.09723	3.16252	3.95567	3.60337
7.29	4.45547	4.09194	3.15619	3.95005	3.59775
7.3	4.45058	4.08665	3.14987	3.94443	3.59213
7.31	4.44568	4.08136	3.14354	3.93881	3.58651
7.32	4.44079	4.07607	3.13722	3.93319	3.58089
7.33	4.4359	4.07078	3.13089	3.92757	3.57527
7.34	4.431	4.06549	3.12457	3.92195	3.56965
7.35	4.42611	4.0602	3.11824	3.91633	3.56403
7.36	4.42121	4.05491	3.11192	3.91071	3.55841
7.37	4.41632	4.04962	3.1056	3.90509	3.55279
7.38	4.41143	4.04433	3.09927	3.89947	3.54717
7.39	4.40653	4.03904	3.09295	3.89386	3.54155
7.4	4.40164	4.03375	3.08662	3.88824	3.53593
7.41	4.39674	4.02846	3.0803	3.88262	3.53031
7.42	4.39185	4.02317	3.07397	3.877	3.52469
7.43	4.38695	4.01788	3.06765	3.87138	3.51907
7.44	4.38206	4.01259	3.06132	3.86576	3.51345
7.45	4.37717	4.0073	3.055	3.86014	3.50783
7.46	4.37227	4.00201	3.04868	3.85452	3.50221
7.47	4.36738	3.99672	3.04235	3.8489	3.49659
7.48	4.36248	3.99143	3.03603	3.84328	3.49097
7.49	4.35759	3.98614	3.0297	3.83766	3.48535
7.5	4.3527	3.98084	3.02338	3.83204	3.47973
7.51	4.3478	3.97555	3.01705	3.82643	3.47411
7.52	4.34291	3.97026	3.01073	3.82081	3.46849
7.53	4.33801	3.96497	3.0044	3.81519	3.46287
7.54	4.33312	3.95968	2.99808	3.80957	3.45725
7.55	4.32823	3.95439	2.99176	3.80395	3.45163
7.56	4.32333	3.9491	2.98543	3.79833	3.44601
7.57	4.31844	3.94381	2.97911	3.79271	3.44039
7.58	4.31354	3.93852	2.97278	3.78709	3.43477
7.59	4.30865	3.93323	2.96646	3.78147	3.42915
7.6	4.30375	3.92794	2.96013	3.77585	3.42353
7.61	4.29886	3.92265	2.95381	3.77023	3.41791
7.62	4.29397	3.91736	2.94749	3.76461	3.41229
7.63	4.28907	3.91207	2.94116	3.75899	3.40667
7.64	4.28418	3.90678	2.93484	3.75338	3.40105
7.65	4.27928	3.90149	2.92851	3.74776	3.39543
7.66	4.27439	3.8962	2.92219	3.74214	3.38981
7.67	4.2695	3.89091	2.91586	3.73652	3.38419
7.68	4.2646	3.88562	2.90954	3.7309	3.37857
7.69	4.25971	3.88033	2.90321	3.72528	3.37295
7.7	4.25481	3.87504	2.89689	3.71966	3.36733
7.71	4.24992	3.86975	2.89057	3.71404	3.36171
7.72	4.24503	3.86446	2.88424	3.70842	3.35609
7.73	4.24013	3.85917	2.87792	3.7028	3.35047
7.74	4.23524	3.85387	2.87159	3.69718	3.34485
7.75	4.23034	3.84858	2.86527	3.69156	3.33923
7.76	4.22545	3.84329	2.85894	3.68595	3.33361
7.77	4.22056	3.838	2.85262	3.68033	3.32799
7.78	4.21566	3.83271	2.84629	3.67471	3.32237
7.79	4.21077	3.82742	2.83997	3.66909	3.31675
7.8	4.20587	3.82213	2.83365	3.66347	3.31113
7.81	4.20098	3.81684	2.82732	3.65785	3.30551
7.82	4.19608	3.81155	2.821	3.65223	3.29989
7.83	4.19119	3.80626	2.81467	3.64661	3.29427
7.84	4.1863	3.80097	2.80835	3.64099	3.28865
7.85	4.1814	3.79568	2.80202	3.63537	3.28303
7.86	4.17651	3.79039	2.7957	3.62975	3.27741
7.87	4.17161	3.7851	2.78937	3.62413	3.2718
7.88	4.16672	3.77981	2.78305	3.61851	3.26618
7.89	4.16183	3.77452	2.77673	3.6129	3.26056
7.9	4.15693	3.76923	2.7704	3.60728	3.25494
7.91	4.15204	3.76394	2.76408	3.60166	3.24932
7.92	4.14714	3.75865	2.75775	3.59604	3.2437
7.93	4.14225	3.75336	2.75143	3.59042	3.23808
7.94	4.13736	3.74807	2.7451	3.5848	3.23246
7.95	4.13246	3.74278	2.73878	3.57918	3.22684
7.96	4.12757	3.73749	2.73245	3.57356	3.22122
7.97	4.12267	3.73219	2.72613	3.56794	3.2156
7.98	4.11778	3.7269	2.71981	3.56232	3.20998
7.99	4.11288	3.72161	2.71348	3.5567	3.20436
8	4.10799	3.71632	2.70716	3.55108	3.19874
8.01	4.1031	3.71103	2.70083	3.54547	3.19312
8.02	4.0982	3.70574	2.69451	3.53985	3.1875
8.03	4.09331	3.70045	2.68818	3.53423	3.18188
8.04	4.08841	3.69516	2.68186	3.52861	3.17626
8.05	4.08352	3.68987	2.67553	3.52299	3.17064
8.06	4.07863	3.68458	2.66921	3.51737	3.16502
8.07	4.07373	3.67929	2.66289	3.51175	3.1594
8.08	4.06884	3.674	2.65656	3.50613	3.15378
8.09	4.06394	3.66871	2.65024	3.50051	3.14816
8.1	4.05905	3.66342	2.64391	3.49489	3.14254
8.11	4.05416	3.65813	2.63759	3.48927	3.13692
8.12	4.04926	3.65284	2.63126	3.48365	3.1313
8.13	4.04437	3.64755	2.62494	3.47803	3.12568
8.14	4.03947	3.64226	2.61861	3.47242	3.12006
8.15	4.03458	3.63697	2.61229	3.4668	3.11444
8.16	4.02968	3.63168	2.60597	3.46118	3.10882
8.17	4.02479	3.62639	2.59964	3.45556	3.1032
8.18	4.0199	3.6211	2.59332	3.44994	3.09758
8.19	4.015	3.61581	2.58699	3.44432	3.09196
8.2	4.01011	3.61051	2.58067	3.4387	3.08634
8.21	4.00521	3.60522	2.57434	3.43308	3.08072
8.22	4.00032	3.59993	2.56802	3.42746	3.0751
8.23	3.99543	3.59464	2.5617	3.42184	3.06948
8.24	3.99053	3.58935	2.55537	3.41622	3.06386
8.25	3.98564	3.58406	2.54905	3.4106	3.05824
8.26	3.98074	3.57877	2.54272	3.40499	3.05262
8.27	3.97585	3.57348	2.5364	3.39937	3.047
8.28	3.97096	3.56819	2.53007	3.39375	3.04138
8.29	3.96606	3.5629	2.52375	3.38813	3.03576
8.3	3.96117	3.55761	2.51742	3.38251	3.03014
8.31	3.95627	3.55232	2.5111	3.37689	3.02452
8.32	3.95138	3.54703	2.50478	3.37127	3.0189
8.33	3.94648	3.54174	2.49845	3.36565	3.01328
8.34	3.94159	3.53645	2.49213	3.36003	3.00766
8.35	3.9367	3.53116	2.4858	3.35441	3.00204
8.36	3.9318	3.52587	2.47948	3.34879	2.99642
8.37	3.92691	3.52058	2.47315	3.34317	2.9908
8.38	3.92201	3.51529	2.46683	3.33755	2.98518
8.39	3.91712	3.51	2.4605	3.33194	2.97956
8.4	3.91223	3.50471	2.45418	3.32632	2.97394
8.41	3.90733	3.49942	2.44786	3.3207	2.96832
8.42	3.90244	3.49413	2.44153	3.31508	2.9627
8.43	3.89754	3.48884	2.43521	3.30946	2.95708
8.44	3.89265	3.48354	2.42888	3.30384	2.95146
8.45	3.88776	3.47825	2.42256	3.29822	2.94584
8.46	3.88286	3.47296	2.41623	3.2926	2.94022
8.47	3.87797	3.46767	2.40991	3.28698	2.9346
8.48	3.87307	3.46238	2.40358	3.28136	2.92898
8.49	3.86818	3.45709	2.39726	3.27574	2.92336
8.5	3.86329	3.4518	2.39094	3.27012	2.91774
8.51	3.85839	3.44651	2.38461	3.2645	2.91212
8.52	3.8535	3.44122	2.37829	3.25889	2.9065
8.53	3.8486	3.43593	2.37196	3.25327	2.90088
8.54	3.84371	3.43064	2.36564	3.24765	2.89526
8.55	3.83881	3.42535	2.35931	3.24203	2.88964
8.56	3.83392	3.42006	2.35299	3.23641	2.88402
8.57	3.82903	3.41477	2.34666	3.23079	2.8784
8.58	3.82413	3.40948	2.34034	3.22517	2.87278
8.59	3.81924	3.40419	2.33402	3.21955	2.86716
8.6	3.81434	3.3989	2.32769	3.21393	2.86154
8.61	3.80945	3.39361	2.32137	3.20831	2.85592
8.62	3.80456	3.38832	2.31504	3.20269	2.8503
8.63	3.79966	3.38303	2.30872	3.19707	2.84468
8.64	3.79477	3.37774	2.30239	3.19146	2.83906
8.65	3.78987	3.37245	2.29607	3.18584	2.83344
8.66	3.78498	3.36716	2.28974	3.18022	2.82782
8.67	3.78009	3.36186	2.28342	3.1746	2.8222
8.68	3.77519	3.35657	2.2771	3.16898	2.81658
8.69	3.7703	3.35128	2.27077	3.16336	2.81096
8.7	3.7654	3.34599	2.26445	3.15774	2.80534
8.71	3.76051	3.3407	2.25812	3.15212	2.79972
8.72	3.75561	3.33541	2.2518	3.1465	2.7941
8.73	3.75072	3.33012	2.24547	3.14088	2.78848
8.74	3.74583	3.32483	2.23915	3.13526	2.78286
8.75	3.74093	3.31954	2.23282	3.12964	2.77724
8.76	3.73604	3.31425	2.2265	3.12402	2.77162
8.77	3.73114	3.30896	2.22018	3.11841	2.766
8.78	3.72625	3.30367	2.21385	3.11279	2.76038
8.79	3.72136	3.29838	2.20753	3.10717	2.75476
8.8	3.71646	3.29309	2.2012	3.10155	2.74914
8.81	3.71157	3.2878	2.19488	3.09593	2.74353
8.82	3.70667	3.28251	2.18855	3.09031	2.73791
8.83	3.70178	3.27722	2.18223	3.08469	2.73229
8.84	3.69689	3.27193	2.1759	3.07907	2.72667
8.85	3.69199	3.26664	2.16958	3.07345	2.72105
8.86	3.6871	3.26135	2.16326	3.06783	2.71543
8.87	3.6822	3.25606	2.15693	3.06221	2.70981
8.88	3.67731	3.25077	2.15061	3.05659	2.70419
8.89	3.67241	3.24548	2.14428	3.05098	2.69857
8.9	3.66752	3.24019	2.13796	3.04536	2.69295
8.91	3.66263	3.23489	2.13163	3.03974	2.68733
8.92	3.65773	3.2296	2.12531	3.03412	2.68171
8.93	3.65284	3.22431	2.11899	3.0285	2.67609
8.94	3.64794	3.21902	2.11266	3.02288	2.67047
8.95	3.64305	3.21373	2.10634	3.01726	2.66485
8.96	3.63816	3.20844	2.10001	3.01164	2.65923
8.97	3.63326	3.20315	2.09369	3.00602	2.65361
8.98	3.62837	3.19786	2.08736	3.0004	2.64799
8.99	3.62347	3.19257	2.08104	2.99478	2.64237
9	3.61858	3.18728	2.07471	2.98916	2.63675
9.01	3.61369	3.18199	2.06839	2.98354	2.63113
9.02	3.60879	3.1767	2.06207	2.97793	2.62551
9.03	3.6039	3.17141	2.05574	2.97231	2.61989
9.04	3.599	3.16612	2.04942	2.96669	2.61427
9.05	3.59411	3.16083	2.04309	2.96107	2.60865
9.06	3.58922	3.15554	2.03677	2.95545	2.60303
9.07	3.58432	3.15025	2.03044	2.94983	2.59741
9.08	3.57943	3.14496	2.02412	2.94421	2.59179
9.09	3.57453	3.13967	2.01779	2.93859	2.58617
9.1	3.56964	3.13438	2.01147	2.93297	2.58055
9.11	3.56474	3.12909	2.00515	2.92735	2.57493
9.12	3.55985	3.1238	1.99882	2.92173	2.56931
9.13	3.55496	3.11851	1.9925	2.91611	2.56369
9.14	3.55006	3.11321	1.98617	2.9105	2.55807
9.15	3.54517	3.10792	1.97985	2.90488	2.55245
9.16	3.54027	3.10263	1.97352	2.89926	2.54683
9.17	3.53538	3.09734	1.9672	2.89364	2.54121
9.18	3.53049	3.09205	1.96087	2.88802	2.53559
9.19	3.52559	3.08676	1.95455	2.8824	2.52997
9.2	3.5207	3.08147	1.94823	2.87678	2.52435
9.21	3.5158	3.07618	1.9419	2.87116	2.51873
9.22	3.51091	3.07089	1.93558	2.86554	2.51311
9.23	3.50602	3.0656	1.92925	2.85992	2.50749
9.24	3.50112	3.06031	1.92293	2.8543	2.50187
9.25	3.49623	3.05502	1.9166	2.84868	2.49625
9.26	3.49133	3.04973	1.91028	2.84306	2.49063
9.27	3.48644	3.04444	1.90395	2.83745	2.48501
9.28	3.48154	3.03915	1.89763	2.83183	2.47939
9.29	3.47665	3.03386	1.89131	2.82621	2.47377
9.3	3.47176	3.02857	1.88498	2.82059	2.46815
9.31	3.46686	3.02328	1.87866	2.81497	2.46253
9.32	3.46197	3.01799	1.87233	2.80935	2.45691
9.33	3.45707	3.0127	1.86601	2.80373	2.45129
9.34	3.45218	3.00741	1.85968	2.79811	2.44567
9.35	3.44729	3.00212	1.85336	2.79249	2.44005
9.36	3.44239	2.99683	1.84703	2.78687	2.43443
9.37	3.4375	2.99153	1.84071	2.78125	2.42881
9.38	3.4326	2.98624	1.83439	2.77563	2.42319
9.39	3.42771	2.98095	1.82806	2.77002	2.41757
9.4	3.42282	2.97566	1.82174	2.7644	2.41195
9.41	3.41792	2.97037	1.81541	2.75878	2.40633
9.42	3.41303	2.96508	1.80909	2.75316	2.40071
9.43	3.40813	2.95979	1.80276	2.74754	2.39509
9.44	3.40324	2.9545	1.79644	2.74192	2.38947
9.45	3.39834	2.94921	1.79011	2.7363	2.38385
9.46	3.39345	2.94392	1.78379	2.73068	2.37823
9.47	3.38856	2.93863	1.77747	2.72506	2.37261
9.48	3.38366	2.93334	1.77114	2.71944	2.36699
9.49	3.37877	2.92805	1.76482	2.71382	2.36137
9.5	3.37387	2.92276	1.75849	2.7082	2.35575
9.51	3.36898	2.91747	1.75217	2.70258	2.35013
9.52	3.36409	2.91218	1.74584	2.69697	2.34451
9.53	3.35919	2.90689	1.73952	2.69135	2.33889
9.54	3.3543	2.9016	1.73319	2.68573	2.33327
9.55	3.3494	2.89631	1.72687	2.68011	2.32765
9.56	3.34451	2.89102	1.72055	2.67449	2.32203
9.57	3.33962	2.88573	1.71422	2.66887	2.31641
9.58	3.33472	2.88044	1.7079	2.66325	2.31079
9.59	3.32983	2.87515	1.70157	2.65763	2.30517
9.6	3.32493	2.86986	1.69525	2.65201	2.29955
9.61	3.32004	2.86456	1.68892	2.64639	2.29393
9.62	3.31515	2.85927	1.6826	2.64077	2.28831
9.63	3.31025	2.85398	1.67627	2.63515	2.28269
9.64	3.30536	2.84869	1.66995	2.62954	2.27707
9.65	3.30046	2.8434	1.66363	2.62392	2.27145
9.66	3.29557	2.83811	1.6573	2.6183	2.26583
9.67	3.29067	2.83282	1.65098	2.61268	2.26021
9.68	3.28578	2.82753	1.64465	2.60706	2.25459
9.69	3.28089	2.82224	1.63833	2.60144	2.24897
9.7	3.27599	2.81695	1.632	2.59582	2.24335
9.71	3.2711	2.81166	1.62568	2.5902	2.23773
9.72	3.2662	2.80637	1.61936	2.58458	2.23211
9.73	3.26131	2.80108	1.61303	2.57896	2.22649
9.74	3.25642	2.79579	1.60671	2.57334	2.22087
9.75	3.25152	2.7905	1.60038	2.56772	2.21525
9.76	3.24663	2.78521	1.59406	2.5621	2.20963
9.77	3.24173	2.77992	1.58773	2.55649	2.20401
9.78	3.23684	2.77463	1.58141	2.55087	2.19839
9.79	3.23195	2.76934	1.57508	2.54525	2.19277
9.8	3.22705	2.76405	1.56876	2.53963	2.18716
9.81	3.22216	2.75876	1.56244	2.53401	2.18154
9.82	3.21726	2.75347	1.55611	2.52839	2.17592
9.83	3.21237	2.74818	1.54979	2.52277	2.1703
9.84	3.20747	2.74288	1.54346	2.51715	2.16468
9.85	3.20258	2.73759	1.53714	2.51153	2.15906
9.86	3.19769	2.7323	1.53081	2.50591	2.15344
9.87	3.19279	2.72701	1.52449	2.50029	2.14782
9.88	3.1879	2.72172	1.51816	2.49467	2.1422
9.89	3.183	2.71643	1.51184	2.48906	2.13658
9.9	3.17811	2.71114	1.50552	2.48344	2.13096
9.91	3.17322	2.70585	1.49919	2.47782	2.12534
9.92	3.16832	2.70056	1.49287	2.4722	2.11972
9.93	3.16343	2.69527	1.48654	2.46658	2.1141
9.94	3.15853	2.68998	1.48022	2.46096	2.10848
9.95	3.15364	2.68469	1.47389	2.45534	2.10286
9.96	3.14875	2.6794	1.46757	2.44972	2.09724
9.97	3.14385	2.67411	1.46124	2.4441	2.09162
9.98	3.13896	2.66882	1.45492	2.43848	2.086
9.99	3.13406	2.66353	1.4486	2.43286	2.08038
10	3.12917	2.65824	1.44227	2.42724	2.07476
10.01	3.12427	2.65295	1.43595	2.42162	2.06914
10.02	3.11938	2.64766	1.42962	2.41601	2.06352
10.03	3.11449	2.64237	1.4233	2.41039	2.0579
10.04	3.10959	2.63708	1.41697	2.40477	2.05228
10.05	3.1047	2.63179	1.41065	2.39915	2.04666
10.06	3.0998	2.6265	1.40432	2.39353	2.04104
10.07	3.09491	2.62121	1.398	2.38791	2.03542
10.08	3.09002	2.61591	1.39168	2.38229	2.0298
10.09	3.08512	2.61062	1.38535	2.37667	2.02418
10.1	3.08023	2.60533	1.37903	2.37105	2.01856
10.11	3.07533	2.60004	1.3727	2.36543	2.01294
10.12	3.07044	2.59475	1.36638	2.35981	2.00732
10.13	3.06555	2.58946	1.36005	2.35419	2.0017
10.14	3.06065	2.58417	1.35373	2.34858	1.99608
10.15	3.05576	2.57888	1.3474	2.34296	1.99046
10.16	3.05086	2.57359	1.34108	2.33734	1.98484
10.17	3.04597	2.5683	1.33476	2.33172	1.97922
10.18	3.04108	2.56301	1.32843	2.3261	1.9736
10.19	3.03618	2.55772	1.32211	2.32048	1.96798
10.2	3.03129	2.55243	1.31578	2.31486	1.96236
10.21	3.02639	2.54714	1.30946	2.30924	1.95674
10.22	3.0215	2.54185	1.30313	2.30362	1.95112
10.23	3.0166	2.53656	1.29681	2.298	1.9455
10.24	3.01171	2.53127	1.29048	2.29238	1.93988
10.25	3.00682	2.52598	1.28416	2.28676	1.93426
10.26	3.00192	2.52069	1.27784	2.28114	1.92864
10.27	2.99703	2.5154	1.27151	2.27553	1.92302
10.28	2.99213	2.51011	1.26519	2.26991	1.9174
10.29	2.98724	2.50482	1.25886	2.26429	1.91178
10.3	2.98235	2.49953	1.25254	2.25867	1.90616
10.31	2.97745	2.49423	1.24621	2.25305	1.90054
10.32	2.97256	2.48894	1.23989	2.24743	1.89492
10.33	2.96766	2.48365	1.23356	2.24181	1.8893
10.34	2.96277	2.47836	1.22724	2.23619	1.88368
10.35	2.95788	2.47307	1.22092	2.23057	1.87806
10.36	2.95298	2.46778	1.21459	2.22495	1.87244
10.37	2.94809	2.46249	1.20827	2.21933	1.86682
10.38	2.94319	2.4572	1.20194	2.21371	1.8612
10.39	2.9383	2.45191	1.19562	2.2081	1.85558
10.4	2.9334	2.44662	1.18929	2.20248	1.84996
10.41	2.92851	2.44133	1.18297	2.19686	1.84434
10.42	2.92362	2.43604	1.17665	2.19124	1.83872
10.43	2.91872	2.43075	1.17032	2.18562	1.8331
10.44	2.91383	2.42546	1.164	2.18	1.82748
10.45	2.90893	2.42017	1.15767	2.17438	1.82186
10.46	2.90404	2.41488	1.15135	2.16876	1.81624
10.47	2.89915	2.40959	1.14502	2.16314	1.81062
10.48	2.89425	2.4043	1.1387	2.15752	1.805
10.49	2.88936	2.39901	1.13237	2.1519	1.79938
10.5	2.88446	2.39372	1.12605	2.14628	1.79376
10.51	2.87957	2.38843	1.11973	2.14066	1.78814
10.52	2.87468	2.38314	1.1134	2.13505	1.78252
10.53	2.86978	2.37785	1.10708	2.12943	1.7769
10.54	2.86489	2.37256	1.10075	2.12381	1.77128
10.55	2.85999	2.36726	1.09443	2.11819	1.76566
10.56	2.8551	2.36197	1.0881	2.11257	1.76004
10.57	2.8502	2.35668	1.08178	2.10695	1.75442
10.58	2.84531	2.35139	1.07545	2.10133	1.7488
10.59	2.84042	2.3461	1.06913	2.09571	1.74318
10.6	2.83552	2.34081	1.06281	2.09009	1.73756
10.61	2.83063	2.33552	1.05648	2.08447	1.73194
10.62	2.82573	2.33023	1.05016	2.07885	1.72632
10.63	2.82084	2.32494	1.04383	2.07323	1.7207
10.64	2.81595	2.31965	1.03751	2.06762	1.71508
10.65	2.81105	2.31436	1.03118	2.062	1.70946
10.66	2.80616	2.30907	1.02486	2.05638	1.70384
10.67	2.80126	2.30378	1.01853	2.05076	1.69822
10.68	2.79637	2.29849	1.01221	2.04514	1.6926
10.69	2.79148	2.2932	1.00589	2.03952	1.68698
10.7	2.78658	2.28791	0.999561	2.0339	1.68136
10.71	2.78169	2.28262	0.993237	2.02828	1.67574
10.72	2.77679	2.27733	0.986912	2.02266	1.67012
10.73	2.7719	2.27204	0.980588	2.01704	1.6645
10.74	2.76701	2.26675	0.974263	2.01142	1.65888
10.75	2.76211	2.26146	0.967939	2.0058	1.65326
10.76	2.75722	2.25617	0.961614	2.00018	1.64764
10.77	2.75232	2.25088	0.95529	1.99457	1.64202
10.78	2.74743	2.24558	0.948966	1.98895	1.6364
10.79	2.74253	2.24029	0.942641	1.98333	1.63078
10.8	2.73764	2.235	0.936317	1.97771	1.62517
10.81	2.73275	2.22971	0.929992	1.97209	1.61955
10.82	2.72785	2.22442	0.923668	1.96647	1.61393
10.83	2.72296	2.21913	0.917343	1.96085	1.60831
10.84	2.71806	2.21384	0.911019	1.95523	1.60269
10.85	2.71317	2.20855	0.904695	1.94961	1.59707
10.86	2.70828	2.20326	0.89837	1.94399	1.59145
10.87	2.70338	2.19797	0.892046	1.93837	1.58583
10.88	2.69849	2.19268	0.885721	1.93275	1.58021
10.89	2.69359	2.18739	0.879397	1.92714	1.57459
10.9	2.6887	2.1821	0.873072	1.92152	1.56897
10.91	2.68381	2.17681	0.866748	1.9159	1.56335
10.92	2.67891	2.17152	0.860424	1.91028	1.55773
10.93	2.67402	2.16623	0.854099	1.90466	1.55211
10.94	2.66912	2.16094	0.847775	1.89904	1.54649
10.95	2.66423	2.15565	0.84145	1.89342	1.54087
10.96	2.65933	2.15036	0.835126	1.8878	1.53525
10.97	2.65444	2.14507	0.828801	1.88218	1.52963
10.98	2.64955	2.13978	0.822477	1.87656	1.52401
10.99	2.64465	2.13449	0.816153	1.87094	1.51839
11	2.63976	2.1292	0.809828	1.86532	1.51277
11.01	2.63486	2.1239	0.803504	1.8597	1.50715
11.02	2.62997	2.11861	0.797179	1.85409	1.50153
11.03	2.62508	2.11332	0.790855	1.84847	1.49591
11.04	2.62018	2.10803	0.78453	1.84285	1.49029
11.05	2.61529	2.10274	0.778206	1.83723	1.48467
11.06	2.61039	2.09745	0.771882	1.83161	1.47905
11.07	2.6055	2.09216	0.765557	1.82599	1.47343
11.08	2.60061	2.08687	0.759233	1.82037	1.46781
11.09	2.59571	2.08158	0.752908	1.81475	1.46219
11.1	2.59082	2.07629	0.746584	1.80913	1.45657
11.11	2.58592	2.071	0.740259	1.80351	1.45095
11.12	2.58103	2.06571	0.733935	1.79789	1.44533
11.13	2.57613	2.06042	0.727611	1.79227	1.43971
11.14	2.57124	2.05513	0.721286	1.78666	1.43409
11.15	2.56635	2.04984	0.714962	1.78104	1.42847
11.16	2.56145	2.04455	0.708637	1.77542	1.42285
11.17	2.55656	2.03926	0.702313	1.7698	1.41723
11.18	2.55166	2.03397	0.695988	1.76418	1.41161
11.19	2.54677	2.02868	0.689664	1.75856	1.40599
11.2	2.54188	2.02339	0.68334	1.75294	1.40037
11.21	2.53698	2.0181	0.677015	1.74732	1.39475
11.22	2.53209	2.01281	0.670691	1.7417	1.38913
11.23	2.52719	2.00752	0.664366	1.73608	1.38351
11.24	2.5223	2.00223	0.658042	1.73046	1.37789
11.25	2.51741	1.99693	0.651717	1.72484	1.37227
11.26	2.51251	1.99164	0.645393	1.71922	1.36665
11.27	2.50762	1.98635	0.639069	1.71361	1.36103
11.28	2.50272	1.98106	0.632744	1.70799	1.35541
11.29	2.49783	1.97577	0.62642	1.70237	1.34979
11.3	2.49294	1.97048	0.620095	1.69675	1.34417
11.31	2.48804	1.96519	0.613771	1.69113	1.33855
11.32	2.48315	1.9599	0.607446	1.68551	1.33293
11.33	2.47825	1.95461	0.601122	1.67989	1.32731
11.34	2.47336	1.94932	0.594798	1.67427	1.32169
11.35	2.46846	1.94403	0.588473	1.66865	1.31607
11.36	2.46357	1.93874	0.582149	1.66303	1.31045
11.37	2.45868	1.93345	0.575824	1.65741	1.30483
11.38	2.45378	1.92816	0.5695	1.65179	1.29921
11.39	2.44889	1.92287	0.563175	1.64618	1.29359
11.4	2.44399	1.91758	0.556851	1.64056	1.28797
11.41	2.4391	1.91229	0.550527	1.63494	1.28235
11.42	2.43421	1.907	0.544202	1.62932	1.27673
11.43	2.42931	1.90171	0.537878	1.6237	1.27111
11.44	2.42442	1.89642	0.531553	1.61808	1.26549
11.45	2.41952	1.89113	0.525229	1.61246	1.25987
11.46	2.41463	1.88584	0.518904	1.60684	1.25425
11.47	2.40974	1.88055	0.51258	1.60122	1.24863
11.48	2.40484	1.87525	0.506256	1.5956	1.24301
11.49	2.39995	1.86996	0.499931	1.58998	1.23739
11.5	2.39505	1.86467	0.493607	1.58436	1.23177
11.51	2.39016	1.85938	0.487282	1.57874	1.22615
11.52	2.38526	1.85409	0.480958	1.57313	1.22053
11.53	2.38037	1.8488	0.474633	1.56751	1.21491
11.54	2.37548	1.84351	0.468309	1.56189	1.20929
11.55	2.37058	1.83822	0.461985	1.55627	1.20367
11.56	2.36569	1.83293	0.45566	1.55065	1.19805
11.57	2.36079	1.82764	0.449336	1.54503	1.19243
11.58	2.3559	1.82235	0.443011	1.53941	1.18681
11.59	2.35101	1.81706	0.436687	1.53379	1.18119
11.6	2.34611	1.81177	0.430362	1.52817	1.17557
11.61	2.34122	1.80648	0.424038	1.52255	1.16995
11.62	2.33632	1.80119	0.417714	1.51693	1.16433
11.63	2.33143	1.7959	0.411389	1.51131	1.15871
11.64	2.32654	1.79061	0.405065	1.5057	1.15309
11.65	2.32164	1.78532	0.39874	1.50008	1.14747
11.66	2.31675	1.78003	0.392416	1.49446	1.14185
11.67	2.31185	1.77474	0.386091	1.48884	1.13623
11.68	2.30696	1.76945	0.379767	1.48322	1.13061
11.69	2.30206	1.76416	0.373443	1.4776	1.12499
11.7	2.29717	1.75887	0.367118	1.47198	1.11937
11.71	2.29228	1.75358	0.360794	1.46636	1.11375
11.72	2.28738	1.74828	0.354469	1.46074	1.10813
11.73	2.28249	1.74299	0.348145	1.45512	1.10251
11.74	2.27759	1.7377	0.34182	1.4495	1.09689
11.75	2.2727	1.73241	0.335496	1.44388	1.09127
11.76	2.26781	1.72712	0.329171	1.43826	1.08565
11.77	2.26291	1.72183	0.322847	1.43265	1.08003
11.78	2.25802	1.71654	0.316523	1.42703	1.07441
11.79	2.25312	1.71125	0.310198	1.42141	1.06879
11.8	2.24823	1.70596	0.303874	1.41579	1.06318
11.81	2.24334	1.70067	0.297549	1.41017	1.05756
11.82	2.23844	1.69538	0.291225	1.40455	1.05194
11.83	2.23355	1.69009	0.2849	1.39893	1.04632
11.84	2.22865	1.6848	0.278576	1.39331	1.0407
11.85	2.22376	1.67951	0.272252	1.38769	1.03508
11.86	2.21886	1.67422	0.265927	1.38207	1.02946
11.87	2.21397	1.66893	0.259603	1.37645	1.02384
11.88	2.20908	1.66364	0.253278	1.37083	1.01822
11.89	2.20418	1.65835	0.246954	1.36522	1.0126
11.9	2.19929	1.65306	0.240629	1.3596	1.00698
11.91	2.19439	1.64777	0.234305	1.35398	1.00136
11.92	2.1895	1.64248	0.227981	1.34836	0.995736
11.93	2.18461	1.63719	0.221656	1.34274	0.990116
11.94	2.17971	1.6319	0.215332	1.33712	0.984496
11.95	2.17482	1.6266	0.209007	1.3315	0.978877
11.96	2.16992	1.62131	0.202683	1.32588	0.973257
11.97	2.16503	1.61602	0.196358	1.32026	0.967637
11.98	2.16014	1.61073	0.190034	1.31464	0.962017
11.99	2.15524	1.60544	0.18371	1.30902	0.956397
12	2.15035	1.60015	0.177385	1.3034	0.950777
12.01	2.14545	1.59486	0.171061	1.29778	0.945157
12.02	2.14056	1.58957	0.164736	1.29217	0.939537
12.03	2.13567	1.58428	0.158412	1.28655	0.933917
12.04	2.13077	1.57899	0.152087	1.28093	0.928297
12.05	2.12588	1.5737	0.145763	1.27531	0.922678
12.06	2.12098	1.56841	0.139439	1.26969	0.917058
12.07	2.11609	1.56312	0.133114	1.26407	0.911438
12.08	2.11119	1.55783	0.12679	1.25845	0.905818
12.09	2.1063	1.55254	0.120465	1.25283	0.900198
12.1	2.10141	1.54725	0.114141	1.24721	0.894578
12.11	2.09651	1.54196	0.107816	1.24159	0.888958
12.12	2.09162	1.53667	0.101492	1.23597	0.883338
12.13	2.08672	1.53138	0.0951676	1.23035	0.877718
12.14	2.08183	1.52609	0.0888432	1.22474	0.872098
12.15	2.07694	1.5208	0.0825187	1.21912	0.866479
12.16	2.07204	1.51551	0.0761943	1.2135	0.860859
12.17	2.06715	1.51022	0.0698699	1.20788	0.855239
12.18	2.06225	1.50492	0.0635454	1.20226	0.849619
12.19	2.05736	1.49963	0.057221	1.19664	0.843999
12.2	2.05247	1.49434	0.0508966	1.19102	0.838379
12.21	2.04757	1.48905	0.0445722	1.1854	0.832759
12.22	2.04268	1.48376	0.0382477	1.17978	0.827139
12.23	2.03778	1.47847	0.0319233	1.17416	0.821519
12.24	2.03289	1.47318	0.0255989	1.16854	0.815899
12.25	2.02799	1.46789	0.0192744	1.16292	0.810279
12.26	2.0231	1.4626	0.01295	1.1573	0.80466
12.27	2.01821	1.45731	0.00662558	1.15169	0.79904
12.28	2.01331	1.45202	0.000301153	1.14607	0.79342
12.29	2.00842	1.44673	-0.00602328	1.14045	0.7878
12.3	2.00352	1.44144	-0.0123477	1.13483	0.78218
12.31	1.99863	1.43615	-0.0186721	1.12921	0.77656
12.32	1.99374	1.43086	-0.0249966	1.12359	0.77094
12.33	1.98884	1.42557	-0.031321	1.11797	0.76532
12.34	1.98395	1.42028	-0.0376454	1.11235	0.7597
12.35	1.97905	1.41499	-0.0439699	1.10673	0.75408
12.36	1.97416	1.4097	-0.0502943	1.10111	0.748461
12.37	1.96927	1.40441	-0.0566187	1.09549	0.742841
12.38	1.96437	1.39912	-0.0629431	1.08987	0.737221
12.39	1.95948	1.39383	-0.0692676	1.08426	0.731601
12.4	1.95458	1.38854	-0.075592	1.07864	0.725981
12.41	1.94969	1.38325	-0.0819164	1.07302	0.720361
12.42	1.94479	1.37795	-0.0882409	1.0674	0.714741
12.43	1.9399	1.37266	-0.0945653	1.06178	0.709121
12.44	1.93501	1.36737	-0.10089	1.05616	0.703501
12.45	1.93011	1.36208	-0.107214	1.05054	0.697881
12.46	1.92522	1.35679	-0.113539	1.04492	0.692262
12.47	1.92032	1.3515	-0.119863	1.0393	0.686642
12.48	1.91543	1.34621	-0.126187	1.03368	0.681022
12.49	1.91054	1.34092	-0.132512	1.02806	0.675402
12.5	1.90564	1.33563	-0.138836	1.02244	0.669782
12.51	1.90075	1.33034	-0.145161	1.01682	0.664162
12.52	1.89585	1.32505	-0.151485	1.01121	0.658542
12.53	1.89096	1.31976	-0.15781	1.00559	0.652922
12.54	1.88607	1.31447	-0.164134	0.999967	0.647302
12.55	1.88117	1.30918	-0.170458	0.994348	0.641682
12.56	1.87628	1.30389	-0.176783	0.988729	0.636063
12.57	1.87138	1.2986	-0.183107	0.983109	0.630443
12.58	1.86649	1.29331	-0.189432	0.97749	0.624823
12.59	1.8616	1.28802	-0.195756	0.971871	0.619203
12.6	1.8567	1.28273	-0.202081	0.966252	0.613583
12.61	1.85181	1.27744	-0.208405	0.960633	0.607963
12.62	1.84691	1.27215	-0.214729	0.955013	0.602343
12.63	1.84202	1.26686	-0.221054	0.949394	0.596723
12.64	1.83712	1.26157	-0.227378	0.943775	0.591103
12.65	1.83223	1.25627	-0.233703	0.938156	0.585483
12.66	1.82734	1.25098	-0.240027	0.932537	0.579864
12.67	1.82244	1.24569	-0.246352	0.926917	0.574244
12.68	1.81755	1.2404	-0.252676	0.921298	0.568624
12.69	1.81265	1.23511	-0.259	0.915679	0.563004
12.7	1.80776	1.22982	-0.265325	0.91006	0.557384
12.71	1.80287	1.22453	-0.271649	0.904441	0.551764
12.72	1.79797	1.21924	-0.277974	0.898821	0.546144
12.73	1.79308	1.21395	-0.284298	0.893202	0.540524
12.74	1.78818	1.20866	-0.290623	0.887583	0.534904
12.75	1.78329	1.20337	-0.296947	0.881964	0.529284
12.76	1.7784	1.19808	-0.303271	0.876345	0.523665
12.77	1.7735	1.19279	-0.309596	0.870725	0.518045
12.78	1.76861	1.1875	-0.31592	0.865106	0.512425
12.79	1.76371	1.18221	-0.322245	0.859487	0.506805
12.8	1.75882	1.17692	-0.328569	0.853868	0.501185
12.81	1.75392	1.17163	-0.334894	0.848249	0.495565
12.82	1.74903	1.16634	-0.341218	0.842629	0.489945
12.83	1.74414	1.16105	-0.347542	0.83701	0.484325
12.84	1.73924	1.15576	-0.353867	0.831391	0.478705
12.85	1.73435	1.15047	-0.360191	0.825772	0.473085
12.86	1.72945	1.14518	-0.366516	0.820153	0.467466
12.87	1.72456	1.13989	-0.37284	0.814533	0.461846
12.88	1.71967	1.1346	-0.379165	0.808914	0.456226
12.89	1.71477	1.1293	-0.385489	0.803295	0.450606
12.9	1.70988	1.12401	-0.391813	0.797676	0.444986
12.91	1.70498	1.11872	-0.398138	0.792057	0.439366
12.92	1.70009	1.11343	-0.404462	0.786437	0.433746
12.93	1.6952	1.10814	-0.410787	0.780818	0.428126
12.94	1.6903	1.10285	-0.417111	0.775199	0.422506
12.95	1.68541	1.09756	-0.423436	0.76958	0.416886
12.96	1.68051	1.09227	-0.42976	0.763961	0.411267
12.97	1.67562	1.08698	-0.436084	0.758341	0.405647
12.98	1.67072	1.08169	-0.442409	0.752722	0.400027
12.99	1.66583	1.0764	-0.448733	0.747103	0.394407
13	1.66094	1.07111	-0.455058	0.741484	0.388787
13.01	1.65604	1.06582	-0.461382	0.735865	0.383167
13.02	1.65115	1.06053	-0.467707	0.730245	0.377547
13.03	1.64625	1.05524	-0.474031	0.724626	0.371927
13.04	1.64136	1.04995	-0.480355	0.719007	0.366307
13.05	1.63647	1.04466	-0.48668	0.713388	0.360687
13.06	1.63157	1.03937	-0.493004	0.707769	0.355068
13.07	1.62668	1.03408	-0.499329	0.702149	0.349448
13.08	1.62178	1.02879	-0.505653	0.69653	0.343828
13.09	1.61689	1.0235	-0.511978	0.690911	0.338208
13.1	1.612	1.01821	-0.518302	0.685292	0.332588
13.11	1.6071	1.01292	-0.524627	0.679673	0.326968
13.12	1.60221	1.00762	-0.530951	0.674053	0.321348
13.13	1.59731	1.00233	-0.537275	0.668434	0.315728
13.14	1.59242	0.997044	-0.5436	0.662815	0.310108
13.15	1.58753	0.991754	-0.549924	0.657196	0.304488
13.16	1.58263	0.986463	-0.556249	0.651577	0.298869
13.17	1.57774	0.981173	-0.562573	0.645957	0.293249
13.18	1.57284	0.975882	-0.568898	0.640338	0.287629
13.19	1.56795	0.970592	-0.575222	0.634719	0.282009
13.2	1.56305	0.965301	-0.581546	0.6291	0.276389
13.21	1.55816	0.960011	-0.587871	0.623481	0.270769
13.22	1.55327	0.954721	-0.594195	0.617861	0.265149
13.23	1.54837	0.94943	-0.60052	0.612242	0.259529
13.24	1.54348	0.94414	-0.606844	0.606623	0.253909
13.25	1.53858	0.938849	-0.613169	0.601004	0.248289
13.26	1.53369	0.933559	-0.619493	0.595385	0.24267
13.27	1.5288	0.928268	-0.625817	0.589765	0.23705
13.28	1.5239	0.922978	-0.632142	0.584146	0.23143
13.29	1.51901	0.917688	-0.638466	0.578527	0.22581
13.3	1.51411	0.912397	-0.644791	0.572908	0.22019
13.31	1.50922	0.907107	-0.651115	0.567289	0.21457
13.32	1.50433	0.901816	-0.65744	0.561669	0.20895
13.33	1.49943	0.896526	-0.663764	0.55605	0.20333
13.34	1.49454	0.891235	-0.670088	0.550431	0.19771
13.35	1.48964	0.885945	-0.676413	0.544812	0.19209
13.36	1.48475	0.880655	-0.682737	0.539193	0.186471
13.37	1.47985	0.875364	-0.689062	0.533573	0.180851
13.38	1.47496	0.870074	-0.695386	0.527954	0.175231
13.39	1.47007	0.864783	-0.701711	0.522335	0.169611
13.4	1.46517	0.859493	-0.708035	0.516716	0.163991
13.41	1.46028	0.854202	-0.714359	0.511097	0.158371
13.42	1.45538	0.848912	-0.720684	0.505477	0.152751
13.43	1.45049	0.843622	-0.727008	0.499858	0.147131
13.44	1.4456	0.838331	-0.733333	0.494239	0.141511
13.45	1.4407	0.833041	-0.739657	0.48862	0.135891
13.46	1.43581	0.82775	-0.745982	0.483001	0.130272
13.47	1.43091	0.82246	-0.752306	0.477381	0.124652
13.48	1.42602	0.817169	-0.75863	0.471762	0.119032
13.49	1.42113	0.811879	-0.764955	0.466143	0.113412
13.5	1.41623	0.806589	-0.771279	0.460524	0.107792
13.51	1.41134	0.801298	-0.777604	0.454905	0.102172
13.52	1.40644	0.796008	-0.783928	0.449285	0.0965521
13.53	1.40155	0.790717	-0.790253	0.443666	0.0909322
13.54	1.39665	0.785427	-0.796577	0.438047	0.0853123
13.55	1.39176	0.780136	-0.802901	0.432428	0.0796924
13.56	1.38687	0.774846	-0.809226	0.426809	0.0740725
13.57	1.38197	0.769556	-0.81555	0.421189	0.0684526
13.58	1.37708	0.764265	-0.821875	0.41557	0.0628327
13.59	1.37218	0.758975	-0.828199	0.409951	0.0572128
13.6	1.36729	0.753684	-0.834524	0.404332	0.0515929
13.61	1.3624	0.748394	-0.840848	0.398713	0.045973
13.62	1.3575	0.743103	-0.847172	0.393093	0.0403531
13.63	1.35261	0.737813	-0.853497	0.387474	0.0347332
13.64	1.34771	0.732523	-0.859821	0.381855	0.0291133
13.65	1.34282	0.727232	-0.866146	0.376236	0.0234934
13.66	1.33793	0.721942	-0.87247	0.370617	0.0178735
13.67	1.33303	0.716651	-0.878795	0.364997	0.0122536
13.68	1.32814	0.711361	-0.885119	0.359378	0.0066337
13.69	1.32324	0.706071	-0.891443	0.353759	0.0010138
13.7	1.31835	0.70078	-0.897768	0.34814	-0.0046061
13.71	1.31346	0.69549	-0.904092	0.342521	-0.010226
13.72	1.30856	0.690199	-0.910417	0.336901	-0.0158459
13.73	1.30367	0.684909	-0.916741	0.331282	-0.0214658
13.74	1.29877	0.679618	-0.923066	0.325663	-0.0270857
13.75	1.29388	0.674328	-0.92939	0.320044	-0.0327056
13.76	1.28898	0.669038	-0.935714	0.314425	-0.0383255
13.77	1.28409	0.663747	-0.942039	0.308805	-0.0439454
13.78	1.2792	0.658457	-0.948363	0.303186	-0.0495653
13.79	1.2743	0.653166	-0.954688	0.297567	-0.0551852
13.8	1.26941	0.647876	-0.961012	0.291948	-0.0608051
13.81	1.26451	0.642585	-0.967337	0.286329	-0.066425
13.82	1.25962	0.637295	-0.973661	0.280709	-0.0720449
13.83	1.25473	0.632005	-0.979985	0.27509	-0.0776648
13.84	1.24983	0.626714	-0.98631	0.269471	-0.0832847
13.85	1.24494	0.621424	-0.992634	0.263852	-0.0889046
13.86	1.24004	0.616133	-0.998959	0.258233	-0.0945245
13.87	1.23515	0.610843	-1.00528	0.252613	-0.100144
13.88	1.23026	0.605552	-1.01161	0.246994	-0.105764
13.89	1.22536	0.600262	-1.01793	0.241375	-0.111384
13.9	1.22047	0.594972	-1.02426	0.235756	-0.117004
13.91	1.21557	0.589681	-1.03058	0.230137	-0.122624
13.92	1.21068	0.584391	-1.03691	0.224517	-0.128244
13.93	1.20578	0.5791	-1.04323	0.218898	-0.133864
13.94	1.20089	0.57381	-1.04955	0.213279	-0.139484
13.95	1.196	0.568519	-1.05588	0.20766	-0.145104
13.96	1.1911	0.563229	-1.0622	0.202041	-0.150724
13.97	1.18621	0.557939	-1.06853	0.196421	-0.156343
13.98	1.18131	0.552648	-1.07485	0.190802	-0.161963
13.99	1.17642	0.547358	-1.08118	0.185183	-0.167583
14	1.17153	0.542067	-1.0875	0.179564	-0.173203
14.01	1.16663	0.536777	-1.09383	0.173945	-0.178823
14.02	1.16174	0.531486	-1.10015	0.168325	-0.184443
14.03	1.15684	0.526196	-1.10647	0.162706	-0.190063
14.04	1.15195	0.520906	-1.1128	0.157087	-0.195683
14.05	1.14706	0.515615	-1.11912	0.151468	-0.201303
14.06	1.14216	0.510325	-1.12545	0.145848	-0.206923
14.07	1.13727	0.505034	-1.13177	0.140229	-0.212542
14.08	1.13237	0.499744	-1.1381	0.13461	-0.218162
14.09	1.12748	0.494453	-1.14442	0.128991	-0.223782
14.1	1.12258	0.489163	-1.15075	0.123372	-0.229402
14.11	1.11769	0.483873	-1.15707	0.117752	-0.235022
14.12	1.1128	0.478582	-1.16339	0.112133	-0.240642
14.13	1.1079	0.473292	-1.16972	0.106514	-0.246262
14.14	1.10301	0.468001	-1.17604	0.100895	-0.251882
14.15	1.09811	0.462711	-1.18237	0.0952757	-0.257502
14.16	1.09322	0.45742	-1.18869	0.0896565	-0.263122
14.17	1.08833	0.45213	-1.19502	0.0840373	-0.268741
14.18	1.08343	0.44684	-1.20134	0.0784181	-0.274361
14.19	1.07854	0.441549	-1.20766	0.0727989	-0.279981
14.2	1.07364	0.436259	-1.21399	0.0671797	-0.285601
14.21	1.06875	0.430968	-1.22031	0.0615605	-0.291221
14.22	1.06386	0.425678	-1.22664	0.0559413	-0.296841
14.23	1.05896	0.420387	-1.23296	0.0503221	-0.302461
14.24	1.05407	0.415097	-1.23929	0.0447029	-0.308081
14.25	1.04917	0.409807	-1.24561	0.0390837	-0.313701
14.26	1.04428	0.404516	-1.25194	0.0334645	-0.319321
14.27	1.03939	0.399226	-1.25826	0.0278453	-0.32494
14.28	1.03449	0.393935	-1.26458	0.0222261	-0.33056
14.29	1.0296	0.388645	-1.27091	0.0166069	-0.33618
14.3	1.0247	0.383354	-1.27723	0.0109877	-0.3418
14.31	1.01981	0.378064	-1.28356	0.00536848	-0.34742
14.32	1.01491	0.372774	-1.28988	-0.000250723	-0.35304
14.33	1.01002	0.367483	-1.29621	-0.00586992	-0.35866
14.34	1.00513	0.362193	-1.30253	-0.0114891	-0.36428
14.35	1.00023	0.356902	-1.30886	-0.0171083	-0.3699
14.36	0.995338	0.351612	-1.31518	-0.0227275	-0.37552
14.37	0.990444	0.346321	-1.3215	-0.0283467	-0.381139
14.38	0.98555	0.341031	-1.32783	-0.0339659	-0.386759
14.39	0.980656	0.335741	-1.33415	-0.0395851	-0.392379
14.4	0.975762	0.33045	-1.34048	-0.0452043	-0.397999
14.41	0.970868	0.32516	-1.3468	-0.0508235	-0.403619
14.42	0.965973	0.319869	-1.35313	-0.0564427	-0.409239
14.43	0.961079	0.314579	-1.35945	-0.0620619	-0.414859
14.44	0.956185	0.309288	-1.36578	-0.0676811	-0.420479
14.45	0.951291	0.303998	-1.3721	-0.0733003	-0.426099
14.46	0.946397	0.298708	-1.37842	-0.0789195	-0.431719
14.47	0.941503	0.293417	-1.38475	-0.0845387	-0.437338
14.48	0.936609	0.288127	-1.39107	-0.0901579	-0.442958
14.49	0.931715	0.282836	-1.3974	-0.0957771	-0.448578
14.5	0.926821	0.277546	-1.40372	-0.101396	-0.454198
14.51	0.921926	0.272255	-1.41005	-0.107016	-0.459818
14.52	0.917032	0.266965	-1.41637	-0.112635	-0.465438
14.53	0.912138	0.261675	-1.4227	-0.118254	-0.471058
14.54	0.907244	0.256384	-1.42902	-0.123873	-0.476678
14.55	0.90235	0.251094	-1.43534	-0.129492	-0.482298
14.56	0.897456	0.245803	-1.44167	-0.135112	-0.487918
14.57	0.892562	0.240513	-1.44799	-0.140731	-0.493537
14.58	0.887668	0.235223	-1.45432	-0.14635	-0.499157
14.59	0.882774	0.229932	-1.46064	-0.151969	-0.504777
14.6	0.877879	0.224642	-1.46697	-0.157588	-0.510397
14.61	0.872985	0.219351	-1.47329	-0.163208	-0.516017
14.62	0.868091	0.214061	-1.47962	-0.168827	-0.521637
14.63	0.863197	0.20877	-1.48594	-0.174446	-0.527257
14.64	0.858303	0.20348	-1.49226	-0.180065	-0.532877
14.65	0.853409	0.19819	-1.49859	-0.185684	-0.538497
14.66	0.848515	0.192899	-1.50491	-0.191304	-0.544117
14.67	0.843621	0.187609	-1.51124	-0.196923	-0.549736
14.68	0.838727	0.182318	-1.51756	-0.202542	-0.555356
14.69	0.833833	0.177028	-1.52389	-0.208161	-0.560976
14.7	0.828938	0.171737	-1.53021	-0.21378	-0.566596
14.71	0.824044	0.166447	-1.53654	-0.2194	-0.572216
14.72	0.81915	0.161157	-1.54286	-0.225019	-0.577836
14.73	0.814256	0.155866	-1.54918	-0.230638	-0.583456
14.74	0.809362	0.150576	-1.55551	-0.236257	-0.589076
14.75	0.804468	0.145285	-1.56183	-0.241876	-0.594696
14.76	0.799574	0.139995	-1.56816	-0.247496	-0.600316
14.77	0.79468	0.134704	-1.57448	-0.253115	-0.605935
14.78	0.789786	0.129414	-1.58081	-0.258734	-0.611555
14.79	0.784891	0.124124	-1.58713	-0.264353	-0.617175
14.8	0.779997	0.118833	-1.59346	-0.269972	-0.622795
14.81	0.775103	0.113543	-1.59978	-0.275592	-0.628415
14.82	0.770209	0.108252	-1.6061	-0.281211	-0.634035
14.83	0.765315	0.102962	-1.61243	-0.28683	-0.639655
14.84	0.760421	0.0976714	-1.61875	-0.292449	-0.645275
14.85	0.755527	0.092381	-1.62508	-0.298068	-0.650895
14.86	0.750633	0.0870906	-1.6314	-0.303688	-0.656515
14.87	0.745739	0.0818001	-1.63773	-0.309307	-0.662134
14.88	0.740844	0.0765097	-1.64405	-0.314926	-0.667754
14.89	0.73595	0.0712193	-1.65037	-0.320545	-0.673374
14.9	0.731056	0.0659288	-1.6567	-0.326164	-0.678994
14.91	0.726162	0.0606384	-1.66302	-0.331784	-0.684614
14.92	0.721268	0.055348	-1.66935	-0.337403	-0.690234
14.93	0.716374	0.0500576	-1.67567	-0.343022	-0.695854
14.94	0.71148	0.0447671	-1.682	-0.348641	-0.701474
14.95	0.706586	0.0394767	-1.68832	-0.35426	-0.707094
14.96	0.701692	0.0341863	-1.69465	-0.35988	-0.712714
14.97	0.696798	0.0288959	-1.70097	-0.365499	-0.718333
14.98	0.691903	0.0236054	-1.70729	-0.371118	-0.723953
14.99	0.687009	0.018315	-1.71362	-0.376737	-0.729573
15	0.682115	0.0130246	-1.71994	-0.382356	-0.735193
15.01	0.677221	0.00773415	-1.72627	-0.387976	-0.740813
15.02	0.672327	0.00244372	-1.73259	-0.393595	-0.746433
15.03	0.667433	-0.00284671	-1.73892	-0.399214	-0.752053
15.04	0.662539	-0.00813714	-1.74524	-0.404833	-0.757673
15.05	0.657645	-0.0134276	-1.75157	-0.410452	-0.763293
15.06	0.652751	-0.018718	-1.75789	-0.416072	-0.768913
15.07	0.647856	-0.0240084	-1.76421	-0.421691	-0.774533
15.08	0.642962	-0.0292988	-1.77054	-0.42731	-0.780152
15.09	0.638068	-0.0345893	-1.77686	-0.432929	-0.785772
15.1	0.633174	-0.0398797	-1.78319	-0.438548	-0.791392
15.11	0.62828	-0.0451701	-1.78951	-0.444168	-0.797012
15.12	0.623386	-0.0504606	-1.79584	-0.449787	-0.802632
15.13	0.618492	-0.055751	-1.80216	-0.455406	-0.808252
15.14	0.613598	-0.0610414	-1.80849	-0.461025	-0.813872
15.15	0.608704	-0.0663318	-1.81481	-0.466644	-0.819492
15.16	0.603809	-0.0716223	-1.82113	-0.472264	-0.825112
15.17	0.598915	-0.0769127	-1.82746	-0.477883	-0.830732
15.18	0.594021	-0.0822031	-1.83378	-0.483502	-0.836351
15.19	0.589127	-0.0874935	-1.84011	-0.489121	-0.841971
15.2	0.584233	-0.092784	-1.84643	-0.49474	-0.847591
15.21	0.579339	-0.0980744	-1.85276	-0.50036	-0.853211
15.22	0.574445	-0.103365	-1.85908	-0.505979	-0.858831
15.23	0.569551	-0.108655	-1.86541	-0.511598	-0.864451
15.24	0.564657	-0.113946	-1.87173	-0.517217	-0.870071
15.25	0.559762	-0.119236	-1.87805	-0.522836	-0.875691
15.26	0.554868	-0.124527	-1.88438	-0.528456	-0.881311
15.27	0.549974	-0.129817	-1.8907	-0.534075	-0.886931
15.28	0.54508	-0.135107	-1.89703	-0.539694	-0.89255
15.29	0.540186	-0.140398	-1.90335	-0.545313	-0.89817
15.3	0.535292	-0.145688	-1.90968	-0.550932	-0.90379
15.31	0.530398	-0.150979	-1.916	-0.556552	-0.90941
15.32	0.525504	-0.156269	-1.92233	-0.562171	-0.91503
15.33	0.52061	-0.16156	-1.92865	-0.56779	-0.92065
15.34	0.515716	-0.16685	-1.93497	-0.573409	-0.92627
15.35	0.510821	-0.17214	-1.9413	-0.579028	-0.93189
15.36	0.505927	-0.177431	-1.94762	-0.584648	-0.93751
15.37	0.501033	-0.182721	-1.95395	-0.590267	-0.94313
15.38	0.496139	-0.188012	-1.96027	-0.595886	-0.948749
15.39	0.491245	-0.193302	-1.9666	-0.601505	-0.954369
15.4	0.486351	-0.198593	-1.97292	-0.607124	-0.959989
15.41	0.481457	-0.203883	-1.97925	-0.612744	-0.965609
15.42	0.476563	-0.209173	-1.98557	-0.618363	-0.971229
15.43	0.471669	-0.214464	-1.99189	-0.623982	-0.976849
15.44	0.466774	-0.219754	-1.99822	-0.629601	-0.982469
15.45	0.46188	-0.225045	-2.00454	-0.63522	-0.988089
15.46	0.456986	-0.230335	-2.01087	-0.64084	-0.993709
15.47	0.452092	-0.235625	-2.01719	-0.646459	-0.999329
15.48	0.447198	-0.240916	-2.02352	-0.652078	-1.00495
15.49	0.442304	-0.246206	-2.02984	-0.657697	-1.01057
15.5	0.43741	-0.251497	-2.03617	-0.663316	-1.01619
15.51	0.432516	-0.256787	-2.04249	-0.668936	-1.02181
15.52	0.427622	-0.262078	-2.04881	-0.674555	-1.02743
15.53	0.422727	-0.267368	-2.05514	-0.680174	-1.03305
15.54	0.417833	-0.272658	-2.06146	-0.685793	-1.03867
15.55	0.412939	-0.277949	-2.06779	-0.691412	-1.04429
15.56	0.408045	-0.283239	-2.07411	-0.697032	-1.04991
15.57	0.403151	-0.28853	-2.08044	-0.702651	-1.05553
15.58	0.398257	-0.29382	-2.08676	-0.70827	-1.06115
15.59	0.393363	-0.299111	-2.09309	-0.713889	-1.06677
15.6	0.388469	-0.304401	-2.09941	-0.719508	-1.07239
15.61	0.383575	-0.309691	-2.10573	-0.725128	-1.07801
15.62	0.378681	-0.314982	-2.11206	-0.730747	-1.08363
15.63	0.373786	-0.320272	-2.11838	-0.736366	-1.08925
15.64	0.368892	-0.325563	-2.12471	-0.741985	-1.09487
15.65	0.363998	-0.330853	-2.13103	-0.747604	-1.10049
15.66	0.359104	-0.336144	-2.13736	-0.753224	-1.10611
15.67	0.35421	-0.341434	-2.14368	-0.758843	-1.11173
15.68	0.349316	-0.346724	-2.15	-0.764462	-1.11735
15.69	0.344422	-0.352015	-2.15633	-0.770081	-1.12297
15.7	0.339528	-0.357305	-2.16265	-0.7757	-1.12859
15.71	0.334634	-0.362596	-2.16898	-0.78132	-1.13421
15.72	0.329739	-0.367886	-2.1753	-0.786939	-1.13983
15.73	0.324845	-0.373177	-2.18163	-0.792558	-1.14545
15.74	0.319951	-0.378467	-2.18795	-0.798177	-1.15107
15.75	0.315057	-0.383757	-2.19428	-0.803796	-1.15669
15.76	0.310163	-0.389048	-2.2006	-0.809416	-1.16231
15.77	0.305269	-0.394338	-2.20692	-0.815035	-1.16793
15.78	0.300375	-0.399629	-2.21325	-0.820654	-1.17355
15.79	0.295481	-0.404919	-2.21957	-0.826273	-1.17917
15.8	0.290587	-0.41021	-2.2259	-0.831892	-1.18479
15.81	0.285692	-0.4155	-2.23222	-0.837512	-1.19041
15.82	0.280798	-0.42079	-2.23855	-0.843131	-1.19603
15.83	0.275904	-0.426081	-2.24487	-0.84875	-1.20164
15.84	0.27101	-0.431371	-2.2512	-0.854369	-1.20726
15.85	0.266116	-0.436662	-2.25752	-0.859988	-1.21288
15.86	0.261222	-0.441952	-2.26384	-0.865608	-1.2185
15.87	0.256328	-0.447243	-2.27017	-0.871227	-1.22412
15.88	0.251434	-0.452533	-2.27649	-0.876846	-1.22974
15.89	0.24654	-0.457823	-2.28282	-0.882465	-1.23536
15.9	0.241646	-0.463114	-2.28914	-0.888084	-1.24098
15.91	0.236751	-0.468404	-2.29547	-0.893704	-1.2466
15.92	0.231857	-0.473695	-2.30179	-0.899323	-1.25222
15.93	0.226963	-0.478985	-2.30812	-0.904942	-1.25784
15.94	0.222069	-0.484276	-2.31444	-0.910561	-1.26346
15.95	0.217175	-0.489566	-2.32076	-0.91618	-1.26908
15.96	0.212281	-0.494856	-2.32709	-0.9218	-1.2747
15.97	0.207387	-0.500147	-2.33341	-0.927419	-1.28032
15.98	0.202493	-0.505437	-2.33974	-0.933038	-1.28594
15.99	0.197599	-0.510728	-2.34606	-0.938657	-1.29156
16	0.192704	-0.516018	-2.35239	-0.944276	-1.29718
16.01	0.18781	-0.521309	-2.35871	-0.949896	-1.3028
16.02	0.182916	-0.526599	-2.36504	-0.955515	-1.30842
16.03	0.178022	-0.531889	-2.37136	-0.961134	-1.31404
16.04	0.173128	-0.53718	-2.37768	-0.966753	-1.31966
16.05	0.168234	-0.54247	-2.38401	-0.972372	-1.32528
16.06	0.16334	-0.547761	-2.39033	-0.977992	-1.3309
16.07	0.158446	-0.553051	-2.39666	-0.983611	-1.33652
16.08	0.153552	-0.558342	-2.40298	-0.98923	-1.34214
16.09	0.148657	-0.563632	-2.40931	-0.994849	-1.34776
16.1	0.143763	-0.568922	-2.41563	-1.00047	-1.35338
16.11	0.138869	-0.574213	-2.42196	-1.00609	-1.359
16.12	0.133975	-0.579503	-2.42828	-1.01171	-1.36462
16.13	0.129081	-0.584794	-2.4346	-1.01733	-1.37024
16.14	0.124187	-0.590084	-2.44093	-1.02295	-1.37586
16.15	0.119293	-0.595375	-2.44725	-1.02856	-1.38148
16.16	0.114399	-0.600665	-2.45358	-1.03418	-1.3871
16.17	0.109505	-0.605955	-2.4599	-1.0398	-1.39272
16.18	0.10461	-0.611246	-2.46623	-1.04542	-1.39834
16.19	0.0997164	-0.616536	-2.47255	-1.05104	-1.40396
16.2	0.0948223	-0.621827	-2.47888	-1.05666	-1.40958
16.21	0.0899282	-0.627117	-2.4852	-1.06228	-1.4152
16.22	0.0850341	-0.632408	-2.49152	-1.0679	-1.42082
16.23	0.08014	-0.637698	-2.49785	-1.07352	-1.42644
16.24	0.0752458	-0.642988	-2.50417	-1.07914	-1.43206
16.25	0.0703517	-0.648279	-2.5105	-1.08476	-1.43768
16.26	0.0654576	-0.653569	-2.51682	-1.09038	-1.4433
16.27	0.0605635	-0.65886	-2.52315	-1.09599	-1.44892
16.28	0.0556694	-0.66415	-2.52947	-1.10161	-1.45454
16.29	0.0507753	-0.669441	-2.5358	-1.10723	-1.46016
16.3	0.0458812	-0.674731	-2.54212	-1.11285	-1.46578
16.31	0.0409871	-0.680021	-2.54844	-1.11847	-1.4714
16.32	0.036093	-0.685312	-2.55477	-1.12409	-1.47702
16.33	0.0311989	-0.690602	-2.56109	-1.12971	-1.48264
16.34	0.0263048	-0.695893	-2.56742	-1.13533	-1.48826
16.35	0.0214107	-0.701183	-2.57374	-1.14095	-1.49388
16.36	0.0165166	-0.706474	-2.58007	-1.14657	-1.4995
16.37	0.0116224	-0.711764	-2.58639	-1.15219	-1.50512
16.38	0.00672834	-0.717054	-2.59271	-1.15781	-1.51074
16.39	0.00183423	-0.722345	-2.59904	-1.16343	-1.51636
16.4	-0.00305988	-0.727635	-2.60536	-1.16904	-1.52198
16.41	-0.00795399	-0.732926	-2.61169	-1.17466	-1.5276
16.42	-0.0128481	-0.738216	-2.61801	-1.18028	-1.53322
16.43	-0.0177422	-0.743506	-2.62434	-1.1859	-1.53884
16.44	-0.0226363	-0.748797	-2.63066	-1.19152	-1.54446
16.45	-0.0275304	-0.754087	-2.63699	-1.19714	-1.55008
16.46	-0.0324245	-0.759378	-2.64331	-1.20276	-1.5557
16.47	-0.0373186	-0.764668	-2.64963	-1.20838	-1.56132
16.48	-0.0422127	-0.769959	-2.65596	-1.214	-1.56694
16.49	-0.0471068	-0.775249	-2.66228	-1.21962	-1.57256
16.5	-0.052001	-0.780539	-2.66861	-1.22524	-1.57818
16.51	-0.0568951	-0.78583	-2.67493	-1.23086	-1.5838
16.52	-0.0617892	-0.79112	-2.68126	-1.23647	-1.58942
16.53	-0.0666833	-0.796411	-2.68758	-1.24209	-1.59504
16.54	-0.0715774	-0.801701	-2.69391	-1.24771	-1.60066
16.55	-0.0764715	-0.806992	-2.70023	-1.25333	-1.60628
16.56	-0.0813656	-0.812282	-2.70655	-1.25895	-1.6119
16.57	-0.0862597	-0.817572	-2.71288	-1.26457	-1.61752
16.58	-0.0911538	-0.822863	-2.7192	-1.27019	-1.62314
16.59	-0.0960479	-0.828153	-2.72553	-1.27581	-1.62876
16.6	-0.100942	-0.833444	-2.73185	-1.28143	-1.63438
16.61	-0.105836	-0.838734	-2.73818	-1.28705	-1.64
16.62	-0.11073	-0.844025	-2.7445	-1.29267	-1.64562
16.63	-0.115624	-0.849315	-2.75083	-1.29829	-1.65124
16.64	-0.120518	-0.854605	-2.75715	-1.30391	-1.65686
16.65	-0.125413	-0.859896	-2.76347	-1.30952	-1.66248
16.66	-0.130307	-0.865186	-2.7698	-1.31514	-1.6681
16.67	-0.135201	-0.870477	-2.77612	-1.32076	-1.67372
16.68	-0.140095	-0.875767	-2.78245	-1.32638	-1.67934
16.69	-0.144989	-0.881058	-2.78877	-1.332	-1.68496
16.7	-0.149883	-0.886348	-2.7951	-1.33762	-1.69058
16.71	-0.154777	-0.891638	-2.80142	-1.34324	-1.6962
16.72	-0.159671	-0.896929	-2.80775	-1.34886	-1.70182
16.73	-0.164565	-0.902219	-2.81407	-1.35448	-1.70744
16.74	-0.16946	-0.90751	-2.82039	-1.3601	-1.71306
16.75	-0.174354	-0.9128	-2.82672	-1.36572	-1.71868
16.76	-0.179248	-0.918091	-2.83304	-1.37134	-1.7243
16.77	-0.184142	-0.923381	-2.83937	-1.37695	-1.72992
16.78	-0.189036	-0.928671	-2.84569	-1.38257	-1.73554
16.79	-0.19393	-0.933962	-2.85202	-1.38819	-1.74116
16.8	-0.198824	-0.939252	-2.85834	-1.39381	-1.74678
16.81	-0.203718	-0.944543	-2.86467	-1.39943	-1.7524
16.82	-0.208612	-0.949833	-2.87099	-1.40505	-1.75802
16.83	-0.213507	-0.955124	-2.87731	-1.41067	-1.76364
16.84	-0.218401	-0.960414	-2.88364	-1.41629	-1.76925
16.85	-0.223295	-0.965704	-2.88996	-1.42191	-1.77487
16.86	-0.228189	-0.970995	-2.89629	-1.42753	-1.78049
16.87	-0.233083	-0.976285	-2.90261	-1.43315	-1.78611
16.88	-0.237977	-0.981576	-2.90894	-1.43877	-1.79173
16.89	-0.242871	-0.986866	-2.91526	-1.44439	-1.79735
16.9	-0.247765	-0.992157	-2.92159	-1.45	-1.80297
16.91	-0.252659	-0.997447	-2.92791	-1.45562	-1.80859
16.92	-0.257553	-1.00274	-2.93423	-1.46124	-1.81421
16.93	-0.262448	-1.00803	-2.94056	-1.46686	-1.81983
16.94	-0.267342	-1.01332	-2.94688	-1.47248	-1.82545
16.95	-0.272236	-1.01861	-2.95321	-1.4781	-1.83107
16.96	-0.27713	-1.0239	-2.95953	-1.48372	-1.83669
16.97	-0.282024	-1.02919	-2.96586	-1.48934	-1.84231
16.98	-0.286918	-1.03448	-2.97218	-1.49496	-1.84793
16.99	-0.291812	-1.03977	-2.97851	-1.50058	-1.85355
17	-0.296706	-1.04506	-2.98483	-1.5062	-1.85917
17.01	-0.3016	-1.05035	-2.99115	-1.51182	-1.86479
17.02	-0.306495	-1.05564	-2.99748	-1.51743	-1.87041
17.03	-0.311389	-1.06093	-3.0038	-1.52305	-1.87603
17.04	-0.316283	-1.06622	-3.01013	-1.52867	-1.88165
17.05	-0.321177	-1.07151	-3.01645	-1.53429	-1.88727
17.06	-0.326071	-1.0768	-3.02278	-1.53991	-1.89289
17.07	-0.330965	-1.08209	-3.0291	-1.54553	-1.89851
17.08	-0.335859	-1.08738	-3.03543	-1.55115	-1.90413
17.09	-0.340753	-1.09267	-3.04175	-1.55677	-1.90975
17.1	-0.345647	-1.09797	-3.04807	-1.56239	-1.91537
17.11	-0.350542	-1.10326	-3.0544	-1.56801	-1.92099
17.12	-0.355436	-1.10855	-3.06072	-1.57363	-1.92661
17.13	-0.36033	-1.11384	-3.06705	-1.57925	-1.93223
17.14	-0.365224	-1.11913	-3.07337	-1.58487	-1.93785
17.15	-0.370118	-1.12442	-3.0797	-1.59048	-1.94347
17.16	-0.375012	-1.12971	-3.08602	-1.5961	-1.94909
17.17	-0.379906	-1.135	-3.09234	-1.60172	-1.95471
17.18	-0.3848	-1.14029	-3.09867	-1.60734	-1.96033
17.19	-0.389694	-1.14558	-3.10499	-1.61296	-1.96595
17.2	-0.394588	-1.15087	-3.11132	-1.61858	-1.97157
17.21	-0.399483	-1.15616	-3.11764	-1.6242	-1.97719
17.22	-0.404377	-1.16145	-3.12397	-1.62982	-1.98281
17.23	-0.409271	-1.16674	-3.13029	-1.63544	-1.98843
17.24	-0.414165	-1.17203	-3.13662	-1.64106	-1.99405
17.25	-0.419059	-1.17732	-3.14294	-1.64668	-1.99967
17.26	-0.423953	-1.18261	-3.14926	-1.6523	-2.00529
17.27	-0.428847	-1.1879	-3.15559	-1.65791	-2.01091
17.28	-0.433741	-1.19319	-3.16191	-1.66353	-2.01653
17.29	-0.438635	-1.19848	-3.16824	-1.66915	-2.02215
17.3	-0.44353	-1.20377	-3.17456	-1.67477	-2.02777
17.31	-0.448424	-1.20906	-3.18089	-1.68039	-2.03339
17.32	-0.453318	-1.21435	-3.18721	-1.68601	-2.03901
17.33	-0.458212	-1.21964	-3.19354	-1.69163	-2.04463
17.34	-0.463106	-1.22494	-3.19986	-1.69725	-2.05025
17.35	-0.468	-1.23023	-3.20618	-1.70287	-2.05587
17.36	-0.472894	-1.23552	-3.21251	-1.70849	-2.06149
17.37	-0.477788	-1.24081	-3.21883	-1.71411	-2.06711
17.38	-0.482682	-1.2461	-3.22516	-1.71973	-2.07273
17.39	-0.487577	-1.25139	-3.23148	-1.72535	-2.07835
17.4	-0.492471	-1.25668	-3.23781	-1.73096	-2.08397
17.41	-0.497365	-1.26197	-3.24413	-1.73658	-2.08959
17.42	-0.502259	-1.26726	-3.25046	-1.7422	-2.09521
17.43	-0.507153	-1.27255	-3.25678	-1.74782	-2.10083
17.44	-0.512047	-1.27784	-3.2631	-1.75344	-2.10645
17.45	-0.516941	-1.28313	-3.26943	-1.75906	-2.11207
17.46	-0.521835	-1.28842	-3.27575	-1.76468	-2.11769
17.47	-0.526729	-1.29371	-3.28208	-1.7703	-2.12331
17.48	-0.531624	-1.299	-3.2884	-1.77592	-2.12893
17.49	-0.536518	-1.30429	-3.29473	-1.78154	-2.13455
17.5	-0.541412	-1.30958	-3.30105	-1.78716	-2.14017
17.51	-0.546306	-1.31487	-3.30738	-1.79278	-2.14579
17.52	-0.5512	-1.32016	-3.3137	-1.7984	-2.15141
17.53	-0.556094	-1.32545	-3.32002	-1.80401	-2.15703
17.54	-0.560988	-1.33074	-3.32635	-1.80963	-2.16265
17.55	-0.565882	-1.33603	-3.33267	-1.81525	-2.16827
17.56	-0.570776	-1.34132	-3.339	-1.82087	-2.17389
17.57	-0.57567	-1.34662	-3.34532	-1.82649	-2.17951
17.58	-0.580565	-1.35191	-3.35165	-1.83211	-2.18513
17.59	-0.585459	-1.3572	-3.35797	-1.83773	-2.19075
17.6	-0.590353	-1.36249	-3.3643	-1.84335	-2.19637
17.61	-0.595247	-1.36778	-3.37062	-1.84897	-2.20199
17.62	-0.600141	-1.37307	-3.37694	-1.85459	-2.20761
17.63	-0.605035	-1.37836	-3.38327	-1.86021	-2.21323
17.64	-0.609929	-1.38365	-3.38959	-1.86583	-2.21885
17.65	-0.614823	-1.38894	-3.39592	-1.87144	-2.22447
17.66	-0.619717	-1.39423	-3.40224	-1.87706	-2.23009
17.67	-0.624612	-1.39952	-3.40857	-1.88268	-2.23571
17.68	-0.629506	-1.40481	-3.41489	-1.8883	-2.24133
17.69	-0.6344	-1.4101	-3.42122	-1.89392	-2.24695
17.7	-0.639294	-1.41539	-3.42754	-1.89954	-2.25257
17.71	-0.644188	-1.42068	-3.43386	-1.90516	-2.25819
17.72	-0.649082	-1.42597	-3.44019	-1.91078	-2.26381
17.73	-0.653976	-1.43126	-3.44651	-1.9164	-2.26943
17.74	-0.65887	-1.43655	-3.45284	-1.92202	-2.27505
17.75	-0.663764	-1.44184	-3.45916	-1.92764	-2.28067
17.76	-0.668659	-1.44713	-3.46549	-1.93326	-2.28629
17.77	-0.673553	-1.45242	-3.47181	-1.93888	-2.29191
17.78	-0.678447	-1.45771	-3.47814	-1.94449	-2.29753
17.79	-0.683341	-1.463	-3.48446	-1.95011	-2.30315
17.8	-0.688235	-1.46829	-3.49078	-1.95573	-2.30877
17.81	-0.693129	-1.47359	-3.49711	-1.96135	-2.31439
17.82	-0.698023	-1.47888	-3.50343	-1.96697	-2.32001
17.83	-0.702917	-1.48417	-3.50976	-1.97259	-2.32563
17.84	-0.707811	-1.48946	-3.51608	-1.97821	-2.33125
17.85	-0.712705	-1.49475	-3.52241	-1.98383	-2.33686
17.86	-0.7176	-1.50004	-3.52873	-1.98945	-2.34248
17.87	-0.722494	-1.50533	-3.53505	-1.99507	-2.3481
17.88	-0.727388	-1.51062	-3.54138	-2.00069	-2.35372
17.89	-0.732282	-1.51591	-3.5477	-2.00631	-2.35934
17.9	-0.737176	-1.5212	-3.55403	-2.01192	-2.36496
17.91	-0.74207	-1.52649	-3.56035	-2.01754	-2.37058
17.92	-0.746964	-1.53178	-3.56668	-2.02316	-2.3762
17.93	-0.751858	-1.53707	-3.573	-2.02878	-2.38182
17.94	-0.756752	-1.54236	-3.57933	-2.0344	-2.38744
17.95	-0.761647	-1.54765	-3.58565	-2.04002	-2.39306
17.96	-0.766541	-1.55294	-3.59197	-2.04564	-2.39868
17.97	-0.771435	-1.55823	-3.5983	-2.05126	-2.4043
17.98	-0.776329	-1.56352	-3.60462	-2.05688	-2.40992
17.99	-0.781223	-1.56881	-3.61095	-2.0625	-2.41554
18	-0.786117	-1.5741	-3.61727	-2.06812	-2.42116
18.01	-0.791011	-1.57939	-3.6236	-2.07374	-2.42678
18.02	-0.795905	-1.58468	-3.62992	-2.07936	-2.4324
18.03	-0.800799	-1.58997	-3.63625	-2.08497	-2.43802
18.04	-0.805694	-1.59527	-3.64257	-2.09059	-2.44364
18.05	-0.810588	-1.60056	-3.64889	-2.09621	-2.44926
18.06	-0.815482	-1.60585	-3.65522	-2.10183	-2.45488
18.07	-0.820376	-1.61114	-3.66154	-2.10745	-2.4605
18.08	-0.82527	-1.61643	-3.66787	-2.11307	-2.46612
18.09	-0.830164	-1.62172	-3.67419	-2.11869	-2.47174
18.1	-0.835058	-1.62701	-3.68052	-2.12431	-2.47736
18.11	-0.839952	-1.6323	-3.68684	-2.12993	-2.48298
18.12	-0.844846	-1.63759	-3.69317	-2.13555	-2.4886
18.13	-0.84974	-1.64288	-3.69949	-2.14117	-2.49422
18.14	-0.854635	-1.64817	-3.70581	-2.14679	-2.49984
18.15	-0.859529	-1.65346	-3.71214	-2.1524	-2.50546
18.16	-0.864423	-1.65875	-3.71846	-2.15802	-2.51108
18.17	-0.869317	-1.66404	-3.72479	-2.16364	-2.5167
18.18	-0.874211	-1.66933	-3.73111	-2.16926	-2.52232
18.19	-0.879105	-1.67462	-3.73744	-2.17488	-2.52794
18.2	-0.883999	-1.67991	-3.74376	-2.1805	-2.53356
18.21	-0.888893	-1.6852	-3.75009	-2.18612	-2.53918
18.22	-0.893787	-1.69049	-3.75641	-2.19174	-2.5448
18.23	-0.898682	-1.69578	-3.76273	-2.19736	-2.55042
18.24	-0.903576	-1.70107	-3.76906	-2.20298	-2.55604
18.25	-0.90847	-1.70636	-3.77538	-2.2086	-2.56166
18.26	-0.913364	-1.71165	-3.78171	-2.21422	-2.56728
18.27	-0.918258	-1.71695	-3.78803	-2.21984	-2.5729
18.28	-0.923152	-1.72224	-3.79436	-2.22545	-2.57852
18.29	-0.928046	-1.72753	-3.80068	-2.23107	-2.58414
18.3	-0.93294	-1.73282	-3.80701	-2.23669	-2.58976
18.31	-0.937834	-1.73811	-3.81333	-2.24231	-2.59538
18.32	-0.942729	-1.7434	-3.81965	-2.24793	-2.601
18.33	-0.947623	-1.74869	-3.82598	-2.25355	-2.60662
18.34	-0.952517	-1.75398	-3.8323	-2.25917	-2.61224
18.35	-0.957411	-1.75927	-3.83863	-2.26479	-2.61786
18.36	-0.962305	-1.76456	-3.84495	-2.27041	-2.62348
18.37	-0.967199	-1.76985	-3.85128	-2.27603	-2.6291
18.38	-0.972093	-1.77514	-3.8576	-2.28165	-2.63472
18.39	-0.976987	-1.78043	-3.86393	-2.28727	-2.64034
18.4	-0.981881	-1.78572	-3.87025	-2.29288	-2.64596
18.41	-0.986776	-1.79101	-3.87657	-2.2985	-2.65158
18.42	-0.99167	-1.7963	-3.8829	-2.30412	-2.6572
18.43	-0.996564	-1.80159	-3.88922	-2.30974	-2.66282
18.44	-1.00146	-1.80688	-3.89555	-2.31536	-2.66844
18.45	-1.00635	-1.81217	-3.90187	-2.32098	-2.67406
18.46	-1.01125	-1.81746	-3.9082	-2.3266	-2.67968
18.47	-1.01614	-1.82275	-3.91452	-2.33222	-2.6853
18.48	-1.02103	-1.82804	-3.92085	-2.33784	-2.69092
18.49	-1.02593	-1.83333	-3.92717	-2.34346	-2.69654
18.5	-1.03082	-1.83862	-3.93349	-2.34908	-2.70216
18.51	-1.03572	-1.84392	-3.93982	-2.3547	-2.70778
18.52	-1.04061	-1.84921	-3.94614	-2.36032	-2.7134
18.53	-1.0455	-1.8545	-3.95247	-2.36593	-2.71902
18.54	-1.0504	-1.85979	-3.95879	-2.37155	-2.72464
18.55	-1.05529	-1.86508	-3.96512	-2.37717	-2.73026
18.56	-1.06019	-1.87037	-3.97144	-2.38279	-2.73588
18.57	-1.06508	-1.87566	-3.97777	-2.38841	-2.7415
18.58	-1.06998	-1.88095	-3.98409	-2.39403	-2.74712
18.59	-1.07487	-1.88624	-3.99041	-2.39965	-2.75274
18.6	-1.07976	-1.89153	-3.99674	-2.40527	-2.75836
18.61	-1.08466	-1.89682	-4.00306	-2.41089	-2.76398
18.62	-1.08955	-1.90211	-4.00939	-2.41651	-2.7696
18.63	-1.09445	-1.9074	-4.01571	-2.42213	-2.77522
18.64	-1.09934	-1.91269	-4.02204	-2.42775	-2.78084
18.65	-1.10423	-1.91798	-4.02836	-2.43336	-2.78646
18.66	-1.10913	-1.92327	-4.03468	-2.43898	-2.79208
18.67	-1.11402	-1.92856	-4.04101	-2.4446	-2.7977
18.68	-1.11892	-1.93385	-4.04733	-2.45022	-2.80332
18.69	-1.12381	-1.93914	-4.05366	-2.45584	-2.80894
18.7	-1.1287	-1.94443	-4.05998	-2.46146	-2.81456
18.71	-1.1336	-1.94972	-4.06631	-2.46708	-2.82018
18.72	-1.13849	-1.95501	-4.07263	-2.4727	-2.8258
18.73	-1.14339	-1.9603	-4.07896	-2.47832	-2.83142
18.74	-1.14828	-1.9656	-4.08528	-2.48394	-2.83704
18.75	-1.15318	-1.97089	-4.0916	-2.48956	-2.84266
18.76	-1.15807	-1.97618	-4.09793	-2.49518	-2.84828
18.77	-1.16296	-1.98147	-4.10425	-2.5008	-2.8539
18.78	-1.16786	-1.98676	-4.11058	-2.50641	-2.85952
18.79	-1.17275	-1.99205	-4.1169	-2.51203	-2.86514
18.8	-1.17765	-1.99734	-4.12323	-2.51765	-2.87076
18.81	-1.18254	-2.00263	-4.12955	-2.52327	-2.87638
18.82	-1.18743	-2.00792	-4.13588	-2.52889	-2.882
18.83	-1.19233	-2.01321	-4.1422	-2.53451	-2.88762
18.84	-1.19722	-2.0185	-4.14852	-2.54013	-2.89324
18.85	-1.20212	-2.02379	-4.15485	-2.54575	-2.89885
18.86	-1.20701	-2.02908	-4.16117	-2.55137	-2.90447
18.87	-1.2119	-2.03437	-4.1675	-2.55699	-2.91009
18.88	-1.2168	-2.03966	-4.17382	-2.56261	-2.91571
18.89	-1.22169	-2.04495	-4.18015	-2.56823	-2.92133
18.9	-1.22659	-2.05024	-4.18647	-2.57384	-2.92695
18.91	-1.23148	-2.05553	-4.1928	-2.57946	-2.93257
18.92	-1.23638	-2.06082	-4.19912	-2.58508	-2.93819
18.93	-1.24127	-2.06611	-4.20544	-2.5907	-2.94381
18.94	-1.24616	-2.0714	-4.21177	-2.59632	-2.94943
18.95	-1.25106	-2.07669	-4.21809	-2.60194	-2.95505
18.96	-1.25595	-2.08198	-4.22442	-2.60756	-2.96067
18.97	-1.26085	-2.08727	-4.23074	-2.61318	-2.96629
18.98	-1.26574	-2.09257	-4.23707	-2.6188	-2.97191
18.99	-1.27063	-2.09786	-4.24339	-2.62442	-2.97753
19	-1.27553	-2.10315	-4.24972	-2.63004	-2.98315
19.01	-1.28042	-2.10844	-4.25604	-2.63566	-2.98877
19.02	-1.28532	-2.11373	-4.26236	-2.64128	-2.99439
19.03	-1.29021	-2.11902	-4.26869	-2.64689	-3.00001
19.04	-1.2951	-2.12431	-4.27501	-2.65251	-3.00563
19.05	-1.3	-2.1296	-4.28134	-2.65813	-3.01125
19.06	-1.30489	-2.13489	-4.28766	-2.66375	-3.01687
19.07	-1.30979	-2.14018	-4.29399	-2.66937	-3.02249
19.08	-1.31468	-2.14547	-4.30031	-2.67499	-3.02811
19.09	-1.31957	-2.15076	-4.30664	-2.68061	-3.03373
19.1	-1.32447	-2.15605	-4.31296	-2.68623	-3.03935
19.11	-1.32936	-2.16134	-4.31928	-2.69185	-3.04497
19.12	-1.33426	-2.16663	-4.32561	-2.69747	-3.05059
19.13	-1.33915	-2.17192	-4.33193	-2.70309	-3.05621
19.14	-1.34405	-2.17721	-4.33826	-2.70871	-3.06183
19.15	-1.34894	-2.1825	-4.34458	-2.71432	-3.06745
19.16	-1.35383	-2.18779	-4.35091	-2.71994	-3.07307
19.17	-1.35873	-2.19308	-4.35723	-2.72556	-3.07869
19.18	-1.36362	-2.19837	-4.36356	-2.73118	-3.08431
19.19	-1.36852	-2.20366	-4.36988	-2.7368	-3.08993
19.2	-1.37341	-2.20895	-4.3762	-2.74242	-3.09555
19.21	-1.3783	-2.21425	-4.38253	-2.74804	-3.10117
19.22	-1.3832	-2.21954	-4.38885	-2.75366	-3.10679
19.23	-1.38809	-2.22483	-4.39518	-2.75928	-3.11241
19.24	-1.39299	-2.23012	-4.4015	-2.7649	-3.11803
19.25	-1.39788	-2.23541	-4.40783	-2.77052	-3.12365
19.26	-1.40277	-2.2407	-4.41415	-2.77614	-3.12927
19.27	-1.40767	-2.24599	-4.42048	-2.78176	-3.13489
19.28	-1.41256	-2.25128	-4.4268	-2.78737	-3.14051
19.29	-1.41746	-2.25657	-4.43312	-2.79299	-3.14613
19.3	-1.42235	-2.26186	-4.43945	-2.79861	-3.15175
19.31	-1.42725	-2.26715	-4.44577	-2.80423	-3.15737
19.32	-1.43214	-2.27244	-4.4521	-2.80985	-3.16299
19.33	-1.43703	-2.27773	-4.45842	-2.81547	-3.16861
19.34	-1.44193	-2.28302	-4.46475	-2.82109	-3.17423
19.35	-1.44682	-2.28831	-4.47107	-2.82671	-3.17985
19.36	-1.45172	-2.2936	-4.4774	-2.83233	-3.18547
19.37	-1.45661	-2.29889	-4.48372	-2.83795	-3.19109
19.38	-1.4615	-2.30418	-4.49004	-2.84357	-3.19671
19.39	-1.4664	-2.30947	-4.49637	-2.84919	-3.20233
19.4	-1.47129	-2.31476	-4.50269	-2.8548	-3.20795
19.41	-1.47619	-2.32005	-4.50902	-2.86042	-3.21357
19.42	-1.48108	-2.32534	-4.51534	-2.86604	-3.21919
19.43	-1.48597	-2.33063	-4.52167	-2.87166	-3.22481
19.44	-1.49087	-2.33593	-4.52799	-2.87728	-3.23043
19.45	-1.49576	-2.34122	-4.53431	-2.8829	-3.23605
19.46	-1.50066	-2.34651	-4.54064	-2.88852	-3.24167
19.47	-1.50555	-2.3518	-4.54696	-2.89414	-3.24729
19.48	-1.51045	-2.35709	-4.55329	-2.89976	-3.25291
19.49	-1.51534	-2.36238	-4.55961	-2.90538	-3.25853
19.5	-1.52023	-2.36767	-4.56594	-2.911	-3.26415
19.51	-1.52513	-2.37296	-4.57226	-2.91662	-3.26977
19.52	-1.53002	-2.37825	-4.57859	-2.92224	-3.27539
19.53	-1.53492	-2.38354	-4.58491	-2.92785	-3.28101
19.54	-1.53981	-2.38883	-4.59123	-2.93347	-3.28663
19.55	-1.5447	-2.39412	-4.59756	-2.93909	-3.29225
19.56	-1.5496	-2.39941	-4.60388	-2.94471	-3.29787
19.57	-1.55449	-2.4047	-4.61021	-2.95033	-3.30349
19.58	-1.55939	-2.40999	-4.61653	-2.95595	-3.30911
19.59	-1.56428	-2.41528	-4.62286	-2.96157	-3.31473
19.6	-1.56917	-2.42057	-4.62918	-2.96719	-3.32035
19.61	-1.57407	-2.42586	-4.63551	-2.97281	-3.32597
19.62	-1.57896	-2.43115	-4.64183	-2.97843	-3.33159
19.63	-1.58386	-2.43644	-4.64815	-2.98405	-3.33721
19.64	-1.58875	-2.44173	-4.65448	-2.98967	-3.34283
19.65	-1.59364	-2.44702	-4.6608	-2.99528	-3.34845
19.66	-1.59854	-2.45231	-4.66713	-3.0009	-3.35407
19.67	-1.60343	-2.4576	-4.67345	-3.00652	-3.35969
19.68	-1.60833	-2.4629	-4.67978	-3.01214	-3.36531
19.69	-1.61322	-2.46819	-4.6861	-3.01776	-3.37093
19.7	-1.61812	-2.47348	-4.69243	-3.02338	-3.37655
19.71	-1.62301	-2.47877	-4.69875	-3.029	-3.38217
19.72	-1.6279	-2.48406	-4.70507	-3.03462	-3.38779
19.73	-1.6328	-2.48935	-4.7114	-3.04024	-3.39341
19.74	-1.63769	-2.49464	-4.71772	-3.04586	-3.39903
19.75	-1.64259	-2.49993	-4.72405	-3.05148	-3.40465
19.76	-1.64748	-2.50522	-4.73037	-3.0571	-3.41027
19.77	-1.65237	-2.51051	-4.7367	-3.06272	-3.41589
19.78	-1.65727	-2.5158	-4.74302	-3.06833	-3.42151
19.79	-1.66216	-2.52109	-4.74935	-3.07395	-3.42713
19.8	-1.66706	-2.52638	-4.75567	-3.07957	-3.43275
19.81	-1.67195	-2.53167	-4.76199	-3.08519	-3.43837
19.82	-1.67684	-2.53696	-4.76832	-3.09081	-3.44399
19.83	-1.68174	-2.54225	-4.77464	-3.09643	-3.44961
19.84	-1.68663	-2.54754	-4.78097	-3.10205	-3.45523
19.85	-1.69153	-2.55283	-4.78729	-3.10767	-3.46085
19.86	-1.69642	-2.55812	-4.79362	-3.11329	-3.46646
19.87	-1.70132	-2.56341	-4.79994	-3.11891	-3.47208
19.88	-1.70621	-2.5687	-4.80627	-3.12453	-3.4777
19.89	-1.7111	-2.57399	-4.81259	-3.13015	-3.48332
19.9	-1.716	-2.57928	-4.81891	-3.13576	-3.48894
19.91	-1.72089	-2.58458	-4.82524	-3.14138	-3.49456
19.92	-1.72579	-2.58987	-4.83156	-3.147	-3.50018
19.93	-1.73068	-2.59516	-4.83789	-3.15262	-3.5058
19.94	-1.73557	-2.60045	-4.84421	-3.15824	-3.51142
19.95	-1.74047	-2.60574	-4.85054	-3.16386	-3.51704
19.96	-1.74536	-2.61103	-4.85686	-3.16948	-3.52266
19.97	-1.75026	-2.61632	-4.86319	-3.1751	-3.52828
19.98	-1.75515	-2.62161	-4.86951	-3.18072	-3.5339
[truncated: 102 more rows]

## Sheet: FigS2 D(green_line)
Time	Viral RNA load	Uninfected cell ratio
0	3.6684	1
0.01	3.63521	0.999979
0.02	3.62274	0.999958
0.03	3.62991	0.999938
0.04	3.65412	0.999917
0.05	3.69202	0.999895
0.06	3.74023	0.99987
0.07	3.79586	0.999842
0.08	3.85663	0.999809
0.09	3.92089	0.999772
0.1	3.98747	0.999729
0.11	4.05557	0.999679
0.12	4.12467	0.99962
0.13	4.19442	0.99955
0.14	4.26458	0.999469
0.15	4.33502	0.999373
0.16	4.40563	0.999261
0.17	4.47635	0.999128
0.18	4.54714	0.998973
0.19	4.61798	0.998789
0.2	4.68883	0.998573
0.21	4.7597	0.998319
0.22	4.83057	0.99802
0.23	4.90144	0.997669
0.24	4.9723	0.997255
0.25	5.04315	0.996767
0.26	5.11398	0.996194
0.27	5.1848	0.99552
0.28	5.25559	0.994727
0.29	5.32635	0.993794
0.3	5.39708	0.992697
0.31	5.46777	0.991408
0.32	5.53842	0.989894
0.33	5.60901	0.988115
0.34	5.67953	0.986026
0.35	5.74998	0.983575
0.36	5.82034	0.9807
0.37	5.89059	0.977331
0.38	5.96072	0.973386
0.39	6.03071	0.96877
0.4	6.10053	0.963376
0.41	6.17015	0.957081
0.42	6.23954	0.949747
0.43	6.30865	0.941215
0.44	6.37745	0.931313
0.45	6.44589	0.919849
0.46	6.51389	0.906614
0.47	6.5814	0.891385
0.48	6.64833	0.873931
0.49	6.71459	0.854015
0.5	6.78009	0.831407
0.51	6.8447	0.805897
0.52	6.90831	0.777306
0.53	6.97077	0.745512
0.54	7.03194	0.710464
0.55	7.09165	0.672214
0.56	7.14973	0.630932
0.57	7.20601	0.586927
0.58	7.26031	0.540658
0.59	7.31245	0.492735
0.6	7.36226	0.4439
0.61	7.40958	0.394998
0.62	7.45428	0.34693
0.63	7.49625	0.300591
0.64	7.5354	0.256816
0.65	7.57169	0.216305
0.66	7.60511	0.179591
0.67	7.63569	0.147004
0.68	7.66348	0.118669
0.69	7.68857	0.0945168
0.7	7.71109	0.0743223
0.71	7.73116	0.0577417
0.72	7.74894	0.044359
0.73	7.76458	0.0337277
0.74	7.77826	0.0254045
0.75	7.79014	0.0189742
0.76	7.80037	0.0140656
0.77	7.8091	0.0103583
0.78	7.81648	0.00758461
0.79	7.82263	0.0055266
0.8	7.82769	0.00401053
0.81	7.83176	0.00290053
0.82	7.83493	0.00209208
0.83	7.83731	0.00150581
0.84	7.83897	0.00108218
0.85	7.83998	0.000776941
0.86	7.84042	0.000557489
0.87	7.84033	0.000399971
0.88	7.83978	0.00028703
0.89	7.8388	0.000206102
0.9	7.83744	0.000148124
0.91	7.83573	0.000106579
0.92	7.83372	7.68e-05
0.93	7.83142	5.54e-05
0.94	7.82887	4.01e-05
0.95	7.82608	2.9e-05
0.96	7.82309	2.11e-05
0.97	7.81991	1.53e-05
0.98	7.81655	1.12e-05
0.99	7.81304	8.18e-06
1	7.80939	6e-06
1.01	7.8056	4.41e-06
1.02	7.8017	3.25e-06
1.03	7.7977	2.4e-06
1.04	7.79359	1.78e-06
1.05	7.78939	1.32e-06
1.06	7.78512	9.86e-07
1.07	7.78077	7.37e-07
1.08	7.77635	5.53e-07
1.09	7.77187	4.16e-07
1.1	7.76733	3.14e-07
1.11	7.76275	2.37e-07
1.12	7.75811	1.8e-07
1.13	7.75343	1.37e-07
1.14	7.74872	1.04e-07
1.15	7.74396	8e-08
1.16	7.73918	6.14e-08
1.17	7.73436	4.73e-08
1.18	7.72952	3.65e-08
1.19	7.72465	2.83e-08
1.2	7.71976	2.19e-08
1.21	7.71485	1.71e-08
1.22	7.70992	1.33e-08
1.23	7.70497	1.04e-08
1.24	7.70001	8.2e-09
1.25	7.69503	6.46e-09
1.26	7.69004	5.1e-09
1.27	7.68503	4.04e-09
1.28	7.68002	3.21e-09
1.29	7.67499	2.55e-09
1.3	7.66996	2.04e-09
1.31	7.66491	1.63e-09
1.32	7.65986	1.31e-09
1.33	7.6548	1.05e-09
1.34	7.64974	8.48e-10
1.35	7.64467	6.85e-10
1.36	7.63959	5.55e-10
1.37	7.63451	4.51e-10
1.38	7.62942	3.67e-10
1.39	7.62433	3e-10
1.4	7.61923	2.45e-10
1.41	7.61413	2.01e-10
1.42	7.60903	1.65e-10
1.43	7.60393	1.36e-10
1.44	7.59882	1.12e-10
1.45	7.59371	9.31e-11
1.46	7.5886	7.72e-11
1.47	7.58348	6.42e-11
1.48	7.57837	5.35e-11
1.49	7.57325	4.46e-11
1.5	7.56813	3.73e-11
1.51	7.56301	3.13e-11
1.52	7.55789	2.63e-11
1.53	7.55276	2.21e-11
1.54	7.54764	1.87e-11
1.55	7.54251	1.58e-11
1.56	7.53739	1.34e-11
1.57	7.53226	1.13e-11
1.58	7.52713	9.64e-12
1.59	7.522	8.21e-12
1.6	7.51687	7.01e-12
1.61	7.51174	5.99e-12
1.62	7.50661	5.13e-12
1.63	7.50148	4.4e-12
1.64	7.49635	3.78e-12
1.65	7.49121	3.26e-12
1.66	7.48608	2.81e-12
1.67	7.48095	2.43e-12
1.68	7.47582	2.1e-12
1.69	7.47068	1.82e-12
1.7	7.46555	1.58e-12
1.71	7.46041	1.38e-12
1.72	7.45528	1.2e-12
1.73	7.45014	1.05e-12
1.74	7.44501	9.16e-13
1.75	7.43987	8.02e-13
1.76	7.43474	7.04e-13
1.77	7.4296	6.18e-13
1.78	7.42447	5.44e-13
1.79	7.41933	4.79e-13
1.8	7.4142	4.23e-13
1.81	7.40906	3.74e-13
1.82	7.40392	3.31e-13
1.83	7.39879	2.93e-13
1.84	7.39365	2.6e-13
1.85	7.38852	2.31e-13
1.86	7.38338	2.06e-13
1.87	7.37824	1.83e-13
1.88	7.37311	1.63e-13
1.89	7.36797	1.46e-13
1.9	7.36283	1.31e-13
1.91	7.3577	1.17e-13
1.92	7.35256	1.05e-13
1.93	7.34743	9.43e-14
1.94	7.34229	8.48e-14
1.95	7.33715	7.64e-14
1.96	7.33202	6.89e-14
1.97	7.32688	6.22e-14
1.98	7.32174	5.62e-14
1.99	7.3166	5.08e-14
2	7.31147	4.61e-14
2.01	7.30633	4.18e-14
2.02	7.30119	3.79e-14
2.03	7.29606	3.45e-14
2.04	7.29092	3.14e-14
2.05	7.28578	2.86e-14
2.06	7.28065	2.61e-14
2.07	7.27551	2.38e-14
2.08	7.27037	2.18e-14
2.09	7.26524	1.99e-14
2.1	7.2601	1.82e-14
2.11	7.25496	1.67e-14
2.12	7.24983	1.53e-14
2.13	7.24469	1.41e-14
2.14	7.23955	1.3e-14
2.15	7.23442	1.19e-14
2.16	7.22928	1.1e-14
2.17	7.22414	1.01e-14
2.18	7.219	9.37e-15
2.19	7.21387	8.66e-15
2.2	7.20873	8.01e-15
2.21	7.20359	7.41e-15
2.22	7.19846	6.87e-15
2.23	7.19332	6.37e-15
2.24	7.18818	5.92e-15
2.25	7.18305	5.5e-15
2.26	7.17791	5.11e-15
2.27	7.17277	4.76e-15
2.28	7.16764	4.43e-15
2.29	7.1625	4.13e-15
2.3	7.15736	3.85e-15
2.31	7.15222	3.6e-15
2.32	7.14709	3.36e-15
2.33	7.14195	3.15e-15
2.34	7.13681	2.94e-15
2.35	7.13168	2.76e-15
2.36	7.12654	2.59e-15
2.37	7.1214	2.43e-15
2.38	7.11627	2.28e-15
2.39	7.11113	2.14e-15
2.4	7.10599	2.01e-15
2.41	7.10085	1.89e-15
2.42	7.09572	1.78e-15
2.43	7.09058	1.68e-15
2.44	7.08544	1.58e-15
2.45	7.08031	1.5e-15
2.46	7.07517	1.41e-15
2.47	7.07003	1.33e-15
2.48	7.0649	1.26e-15
2.49	7.05976	1.19e-15
2.5	7.05462	1.13e-15
2.51	7.04948	1.07e-15
2.52	7.04435	1.01e-15
2.53	7.03921	9.63e-16
2.54	7.03407	9.14e-16
2.55	7.02894	8.68e-16
2.56	7.0238	8.25e-16
2.57	7.01866	7.84e-16
2.58	7.01353	7.46e-16
2.59	7.00839	7.1e-16
2.6	7.00325	6.77e-16
2.61	6.99812	6.45e-16
2.62	6.99298	6.15e-16
2.63	6.98784	5.87e-16
2.64	6.9827	5.6e-16
2.65	6.97757	5.35e-16
2.66	6.97243	5.12e-16
2.67	6.96729	4.89e-16
2.68	6.96216	4.68e-16
2.69	6.95702	4.48e-16
2.7	6.95188	4.29e-16
2.71	6.94675	4.11e-16
2.72	6.94161	3.94e-16
2.73	6.93647	3.78e-16
2.74	6.93133	3.63e-16
2.75	6.9262	3.48e-16
2.76	6.92106	3.35e-16
2.77	6.91592	3.22e-16
2.78	6.91079	3.09e-16
2.79	6.90565	2.97e-16
2.8	6.90051	2.86e-16
2.81	6.89538	2.76e-16
2.82	6.89024	2.65e-16
2.83	6.8851	2.56e-16
2.84	6.87996	2.47e-16
2.85	6.87483	2.38e-16
2.86	6.86969	2.3e-16
2.87	6.86455	2.22e-16
2.88	6.85942	2.14e-16
2.89	6.85428	2.07e-16
2.9	6.84914	2e-16
2.91	6.84401	1.93e-16
2.92	6.83887	1.87e-16
2.93	6.83373	1.81e-16
2.94	6.8286	1.75e-16
2.95	6.82346	1.69e-16
2.96	6.81832	1.64e-16
2.97	6.81318	1.59e-16
2.98	6.80805	1.54e-16
2.99	6.80291	1.5e-16
3	6.79777	1.45e-16
3.01	6.79264	1.41e-16
3.02	6.7875	1.37e-16
3.03	6.78236	1.33e-16
3.04	6.77723	1.29e-16
3.05	6.77209	1.25e-16
3.06	6.76695	1.22e-16
3.07	6.76181	1.19e-16
3.08	6.75668	1.15e-16
3.09	6.75154	1.12e-16
3.1	6.7464	1.09e-16
3.11	6.74127	1.06e-16
3.12	6.73613	1.04e-16
3.13	6.73099	1.01e-16
3.14	6.72586	9.84e-17
3.15	6.72072	9.6e-17
3.16	6.71558	9.36e-17
3.17	6.71044	9.13e-17
3.18	6.70531	8.91e-17
3.19	6.70017	8.7e-17
3.2	6.69503	8.49e-17
3.21	6.6899	8.29e-17
3.22	6.68476	8.1e-17
3.23	6.67962	7.92e-17
3.24	6.67449	7.74e-17
3.25	6.66935	7.57e-17
3.26	6.66421	7.4e-17
3.27	6.65908	7.24e-17
3.28	6.65394	7.08e-17
3.29	6.6488	6.93e-17
3.3	6.64366	6.79e-17
3.31	6.63853	6.65e-17
3.32	6.63339	6.51e-17
3.33	6.62825	6.38e-17
3.34	6.62312	6.25e-17
3.35	6.61798	6.13e-17
3.36	6.61284	6.01e-17
3.37	6.60771	5.89e-17
3.38	6.60257	5.78e-17
3.39	6.59743	5.67e-17
3.4	6.59229	5.56e-17
3.41	6.58716	5.46e-17
3.42	6.58202	5.36e-17
3.43	6.57688	5.26e-17
3.44	6.57175	5.17e-17
3.45	6.56661	5.08e-17
3.46	6.56147	4.99e-17
3.47	6.55634	4.9e-17
3.48	6.5512	4.82e-17
3.49	6.54606	4.74e-17
3.5	6.54092	4.66e-17
3.51	6.53579	4.58e-17
3.52	6.53065	4.51e-17
3.53	6.52551	4.44e-17
3.54	6.52038	4.37e-17
3.55	6.51524	4.3e-17
3.56	6.5101	4.23e-17
3.57	6.50497	4.17e-17
3.58	6.49983	4.1e-17
3.59	6.49469	4.04e-17
3.6	6.48956	3.98e-17
3.61	6.48442	3.92e-17
3.62	6.47928	3.87e-17
3.63	6.47414	3.81e-17
3.64	6.46901	3.76e-17
3.65	6.46387	3.71e-17
3.66	6.45873	3.65e-17
3.67	6.4536	3.61e-17
3.68	6.44846	3.56e-17
3.69	6.44332	3.51e-17
3.7	6.43819	3.46e-17
3.71	6.43305	3.42e-17
3.72	6.42791	3.37e-17
3.73	6.42277	3.33e-17
3.74	6.41764	3.29e-17
3.75	6.4125	3.25e-17
3.76	6.40736	3.21e-17
3.77	6.40223	3.17e-17
3.78	6.39709	3.13e-17
3.79	6.39195	3.1e-17
3.8	6.38682	3.06e-17
3.81	6.38168	3.02e-17
3.82	6.37654	2.99e-17
3.83	6.3714	2.96e-17
3.84	6.36627	2.92e-17
3.85	6.36113	2.89e-17
3.86	6.35599	2.86e-17
3.87	6.35086	2.83e-17
3.88	6.34572	2.8e-17
3.89	6.34058	2.77e-17
3.9	6.33545	2.74e-17
3.91	6.33031	2.71e-17
3.92	6.32517	2.68e-17
3.93	6.32004	2.66e-17
3.94	6.3149	2.63e-17
3.95	6.30976	2.61e-17
3.96	6.30462	2.58e-17
3.97	6.29949	2.56e-17
3.98	6.29435	2.53e-17
3.99	6.28921	2.51e-17
4	6.28408	2.48e-17
4.01	6.27894	2.46e-17
4.02	6.2738	2.44e-17
4.03	6.26867	2.42e-17
4.04	6.26353	2.4e-17
4.05	6.25839	2.38e-17
4.06	6.25325	2.36e-17
4.07	6.24812	2.34e-17
4.08	6.24298	2.32e-17
4.09	6.23784	2.3e-17
4.1	6.23271	2.28e-17
4.11	6.22757	2.26e-17
4.12	6.22243	2.24e-17
4.13	6.2173	2.22e-17
4.14	6.21216	2.21e-17
4.15	6.20702	2.19e-17
4.16	6.20188	2.17e-17
4.17	6.19675	2.16e-17
4.18	6.19161	2.14e-17
4.19	6.18647	2.12e-17
4.2	6.18134	2.11e-17
4.21	6.1762	2.09e-17
4.22	6.17106	2.08e-17
4.23	6.16593	2.06e-17
4.24	6.16079	2.05e-17
4.25	6.15565	2.03e-17
4.26	6.15051	2.02e-17
4.27	6.14538	2.01e-17
4.28	6.14024	1.99e-17
4.29	6.1351	1.98e-17
4.3	6.12997	1.97e-17
4.31	6.12483	1.96e-17
4.32	6.11969	1.94e-17
4.33	6.11456	1.93e-17
4.34	6.10942	1.92e-17
4.35	6.10428	1.91e-17
4.36	6.09915	1.9e-17
4.37	6.09401	1.88e-17
4.38	6.08887	1.87e-17
4.39	6.08373	1.86e-17
4.4	6.0786	1.85e-17
4.41	6.07346	1.84e-17
4.42	6.06832	1.83e-17
4.43	6.06319	1.82e-17
4.44	6.05805	1.81e-17
4.45	6.05291	1.8e-17
4.46	6.04778	1.79e-17
4.47	6.04264	1.78e-17
4.48	6.0375	1.77e-17
4.49	6.03236	1.76e-17
4.5	6.02723	1.75e-17
4.51	6.02209	1.75e-17
4.52	6.01695	1.74e-17
4.53	6.01182	1.73e-17
4.54	6.00668	1.72e-17
4.55	6.00154	1.71e-17
4.56	5.99641	1.7e-17
4.57	5.99127	1.69e-17
4.58	5.98613	1.69e-17
4.59	5.98099	1.68e-17
4.6	5.97586	1.67e-17
4.61	5.97072	1.66e-17
4.62	5.96558	1.66e-17
4.63	5.96045	1.65e-17
4.64	5.95531	1.64e-17
4.65	5.95017	1.64e-17
4.66	5.94504	1.63e-17
4.67	5.9399	1.62e-17
4.68	5.93476	1.61e-17
4.69	5.92963	1.61e-17
4.7	5.92449	1.6e-17
4.71	5.91935	1.6e-17
4.72	5.91421	1.59e-17
4.73	5.90908	1.58e-17
4.74	5.90394	1.58e-17
4.75	5.8988	1.57e-17
4.76	5.89367	1.56e-17
4.77	5.88853	1.56e-17
4.78	5.88339	1.55e-17
4.79	5.87826	1.55e-17
4.8	5.87312	1.54e-17
4.81	5.86798	1.54e-17
4.82	5.86284	1.53e-17
4.83	5.85771	1.53e-17
4.84	5.85257	1.52e-17
4.85	5.84743	1.52e-17
4.86	5.8423	1.51e-17
4.87	5.83716	1.51e-17
4.88	5.83202	1.5e-17
4.89	5.82689	1.5e-17
4.9	5.82175	1.49e-17
4.91	5.81661	1.49e-17
4.92	5.81147	1.48e-17
4.93	5.80634	1.48e-17
4.94	5.8012	1.47e-17
4.95	5.79606	1.47e-17
4.96	5.79093	1.46e-17
4.97	5.78579	1.46e-17
4.98	5.78065	1.45e-17
4.99	5.77552	1.45e-17
5	5.77038	1.45e-17
5.01	5.76524	1.44e-17
5.02	5.76011	1.44e-17
5.03	5.75497	1.43e-17
5.04	5.74983	1.43e-17
5.05	5.74469	1.43e-17
5.06	5.73956	1.42e-17
5.07	5.73442	1.42e-17
5.08	5.72928	1.42e-17
5.09	5.72415	1.41e-17
5.1	5.71901	1.41e-17
5.11	5.71387	1.41e-17
5.12	5.70874	1.4e-17
5.13	5.7036	1.4e-17
5.14	5.69846	1.39e-17
5.15	5.69332	1.39e-17
5.16	5.68819	1.39e-17
5.17	5.68305	1.39e-17
5.18	5.67791	1.38e-17
5.19	5.67278	1.38e-17
5.2	5.66764	1.38e-17
5.21	5.6625	1.37e-17
5.22	5.65737	1.37e-17
5.23	5.65223	1.37e-17
5.24	5.64709	1.36e-17
5.25	5.64195	1.36e-17
5.26	5.63682	1.36e-17
5.27	5.63168	1.36e-17
5.28	5.62654	1.35e-17
5.29	5.62141	1.35e-17
5.3	5.61627	1.35e-17
5.31	5.61113	1.34e-17
5.32	5.606	1.34e-17
5.33	5.60086	1.34e-17
5.34	5.59572	1.34e-17
5.35	5.59059	1.33e-17
5.36	5.58545	1.33e-17
5.37	5.58031	1.33e-17
5.38	5.57517	1.33e-17
5.39	5.57004	1.32e-17
5.4	5.5649	1.32e-17
5.41	5.55976	1.32e-17
5.42	5.55463	1.32e-17
5.43	5.54949	1.32e-17
5.44	5.54435	1.31e-17
5.45	5.53922	1.31e-17
5.46	5.53408	1.31e-17
5.47	5.52894	1.31e-17
5.48	5.5238	1.3e-17
5.49	5.51867	1.3e-17
5.5	5.51353	1.3e-17
5.51	5.50839	1.3e-17
5.52	5.50326	1.3e-17
5.53	5.49812	1.29e-17
5.54	5.49298	1.29e-17
5.55	5.48785	1.29e-17
5.56	5.48271	1.29e-17
5.57	5.47757	1.29e-17
5.58	5.47243	1.28e-17
5.59	5.4673	1.28e-17
5.6	5.46216	1.28e-17
5.61	5.45702	1.28e-17
5.62	5.45189	1.28e-17
5.63	5.44675	1.28e-17
5.64	5.44161	1.27e-17
5.65	5.43648	1.27e-17
5.66	5.43134	1.27e-17
5.67	5.4262	1.27e-17
5.68	5.42107	1.27e-17
5.69	5.41593	1.27e-17
5.7	5.41079	1.26e-17
5.71	5.40565	1.26e-17
5.72	5.40052	1.26e-17
5.73	5.39538	1.26e-17
5.74	5.39024	1.26e-17
5.75	5.38511	1.26e-17
5.76	5.37997	1.26e-17
5.77	5.37483	1.25e-17
5.78	5.3697	1.25e-17
5.79	5.36456	1.25e-17
5.8	5.35942	1.25e-17
5.81	5.35428	1.25e-17
5.82	5.34915	1.25e-17
5.83	5.34401	1.25e-17
5.84	5.33887	1.24e-17
5.85	5.33374	1.24e-17
5.86	5.3286	1.24e-17
5.87	5.32346	1.24e-17
5.88	5.31833	1.24e-17
5.89	5.31319	1.24e-17
5.9	5.30805	1.24e-17
5.91	5.30291	1.24e-17
5.92	5.29778	1.23e-17
5.93	5.29264	1.23e-17
5.94	5.2875	1.23e-17
5.95	5.28237	1.23e-17
5.96	5.27723	1.23e-17
5.97	5.27209	1.23e-17
5.98	5.26696	1.23e-17
5.99	5.26182	1.23e-17
6	5.25668	1.23e-17
6.01	5.25154	1.22e-17
6.02	5.24641	1.22e-17
6.03	5.24127	1.22e-17
6.04	5.23613	1.22e-17
6.05	5.231	1.22e-17
6.06	5.22586	1.22e-17
6.07	5.22072	1.22e-17
6.08	5.21559	1.22e-17
6.09	5.21045	1.22e-17
6.1	5.20531	1.22e-17
6.11	5.20018	1.21e-17
6.12	5.19504	1.21e-17
6.13	5.1899	1.21e-17
6.14	5.18476	1.21e-17
6.15	5.17963	1.21e-17
6.16	5.17449	1.21e-17
6.17	5.16935	1.21e-17
6.18	5.16422	1.21e-17
6.19	5.15908	1.21e-17
6.2	5.15394	1.21e-17
6.21	5.14881	1.21e-17
6.22	5.14367	1.21e-17
6.23	5.13853	1.2e-17
6.24	5.13339	1.2e-17
6.25	5.12826	1.2e-17
6.26	5.12312	1.2e-17
6.27	5.11798	1.2e-17
6.28	5.11285	1.2e-17
6.29	5.10771	1.2e-17
6.3	5.10257	1.2e-17
6.31	5.09744	1.2e-17
6.32	5.0923	1.2e-17
6.33	5.08716	1.2e-17
6.34	5.08202	1.2e-17
6.35	5.07689	1.2e-17
6.36	5.07175	1.2e-17
6.37	5.06661	1.19e-17
6.38	5.06148	1.19e-17
6.39	5.05634	1.19e-17
6.4	5.0512	1.19e-17
6.41	5.04607	1.19e-17
6.42	5.04093	1.19e-17
6.43	5.03579	1.19e-17
6.44	5.03066	1.19e-17
6.45	5.02552	1.19e-17
6.46	5.02038	1.19e-17
6.47	5.01524	1.19e-17
6.48	5.01011	1.19e-17
6.49	5.00497	1.19e-17
6.5	4.99983	1.19e-17
6.51	4.9947	1.19e-17
6.52	4.98956	1.19e-17
6.53	4.98442	1.18e-17
6.54	4.97929	1.18e-17
6.55	4.97415	1.18e-17
6.56	4.96901	1.18e-17
6.57	4.96387	1.18e-17
6.58	4.95874	1.18e-17
6.59	4.9536	1.18e-17
6.6	4.94846	1.18e-17
6.61	4.94333	1.18e-17
6.62	4.93819	1.18e-17
6.63	4.93305	1.18e-17
6.64	4.92792	1.18e-17
6.65	4.92278	1.18e-17
6.66	4.91764	1.18e-17
6.67	4.9125	1.18e-17
6.68	4.90737	1.18e-17
6.69	4.90223	1.18e-17
6.7	4.89709	1.18e-17
6.71	4.89196	1.18e-17
6.72	4.88682	1.18e-17
6.73	4.88168	1.17e-17
6.74	4.87655	1.17e-17
6.75	4.87141	1.17e-17
6.76	4.86627	1.17e-17
6.77	4.86114	1.17e-17
6.78	4.856	1.17e-17
6.79	4.85086	1.17e-17
6.8	4.84572	1.17e-17
6.81	4.84059	1.17e-17
6.82	4.83545	1.17e-17
6.83	4.83031	1.17e-17
6.84	4.82518	1.17e-17
6.85	4.82004	1.17e-17
6.86	4.8149	1.17e-17
6.87	4.80977	1.17e-17
6.88	4.80463	1.17e-17
6.89	4.79949	1.17e-17
6.9	4.79435	1.17e-17
6.91	4.78922	1.17e-17
6.92	4.78408	1.17e-17
6.93	4.77894	1.17e-17
6.94	4.77381	1.17e-17
6.95	4.76867	1.17e-17
6.96	4.76353	1.17e-17
6.97	4.7584	1.17e-17
6.98	4.75326	1.17e-17
6.99	4.74812	1.17e-17
7	4.74298	1.17e-17
7.01	4.73785	1.16e-17
7.02	4.73271	1.16e-17
7.03	4.72757	1.16e-17
7.04	4.72244	1.16e-17
7.05	4.7173	1.16e-17
7.06	4.71216	1.16e-17
7.07	4.70703	1.16e-17
7.08	4.70189	1.16e-17
7.09	4.69675	1.16e-17
7.1	4.69162	1.16e-17
7.11	4.68648	1.16e-17
7.12	4.68134	1.16e-17
7.13	4.6762	1.16e-17
7.14	4.67107	1.16e-17
7.15	4.66593	1.16e-17
7.16	4.66079	1.16e-17
7.17	4.65566	1.16e-17
7.18	4.65052	1.16e-17
7.19	4.64538	1.16e-17
7.2	4.64025	1.16e-17
7.21	4.63511	1.16e-17
7.22	4.62997	1.16e-17
7.23	4.62483	1.16e-17
7.24	4.6197	1.16e-17
7.25	4.61456	1.16e-17
7.26	4.60942	1.16e-17
7.27	4.60429	1.16e-17
7.28	4.59915	1.16e-17
7.29	4.59401	1.16e-17
7.3	4.58888	1.16e-17
7.31	4.58374	1.16e-17
7.32	4.5786	1.16e-17
7.33	4.57346	1.16e-17
7.34	4.56833	1.16e-17
7.35	4.56319	1.16e-17
7.36	4.55805	1.16e-17
7.37	4.55292	1.16e-17
7.38	4.54778	1.16e-17
7.39	4.54264	1.16e-17
7.4	4.53751	1.16e-17
7.41	4.53237	1.16e-17
7.42	4.52723	1.15e-17
7.43	4.52209	1.15e-17
7.44	4.51696	1.15e-17
7.45	4.51182	1.15e-17
7.46	4.50668	1.15e-17
7.47	4.50155	1.15e-17
7.48	4.49641	1.15e-17
7.49	4.49127	1.15e-17
7.5	4.48614	1.15e-17
7.51	4.481	1.15e-17
7.52	4.47586	1.15e-17
7.53	4.47073	1.15e-17
7.54	4.46559	1.15e-17
7.55	4.46045	1.15e-17
7.56	4.45531	1.15e-17
7.57	4.45018	1.15e-17
7.58	4.44504	1.15e-17
7.59	4.4399	1.15e-17
7.6	4.43477	1.15e-17
7.61	4.42963	1.15e-17
7.62	4.42449	1.15e-17
7.63	4.41936	1.15e-17
7.64	4.41422	1.15e-17
7.65	4.40908	1.15e-17
7.66	4.40394	1.15e-17
7.67	4.39881	1.15e-17
7.68	4.39367	1.15e-17
7.69	4.38853	1.15e-17
7.7	4.3834	1.15e-17
7.71	4.37826	1.15e-17
7.72	4.37312	1.15e-17
7.73	4.36799	1.15e-17
7.74	4.36285	1.15e-17
7.75	4.35771	1.15e-17
7.76	4.35257	1.15e-17
7.77	4.34744	1.15e-17
7.78	4.3423	1.15e-17
7.79	4.33716	1.15e-17
7.8	4.33203	1.15e-17
7.81	4.32689	1.15e-17
7.82	4.32175	1.15e-17
7.83	4.31662	1.15e-17
7.84	4.31148	1.15e-17
7.85	4.30634	1.15e-17
7.86	4.30121	1.15e-17
7.87	4.29607	1.15e-17
7.88	4.29093	1.15e-17
7.89	4.28579	1.15e-17
7.9	4.28066	1.15e-17
7.91	4.27552	1.15e-17
7.92	4.27038	1.15e-17
7.93	4.26525	1.15e-17
7.94	4.26011	1.15e-17
7.95	4.25497	1.15e-17
7.96	4.24984	1.15e-17
7.97	4.2447	1.15e-17
7.98	4.23956	1.15e-17
7.99	4.23442	1.15e-17
8	4.22929	1.15e-17
8.01	4.22415	1.15e-17
8.02	4.21901	1.15e-17
8.03	4.21388	1.15e-17
8.04	4.20874	1.15e-17
8.05	4.2036	1.15e-17
8.06	4.19847	1.15e-17
8.07	4.19333	1.15e-17
8.08	4.18819	1.15e-17
8.09	4.18305	1.15e-17
8.1	4.17792	1.15e-17
8.11	4.17278	1.15e-17
8.12	4.16764	1.15e-17
8.13	4.16251	1.15e-17
8.14	4.15737	1.15e-17
8.15	4.15223	1.15e-17
8.16	4.1471	1.15e-17
8.17	4.14196	1.15e-17
8.18	4.13682	1.15e-17
8.19	4.13169	1.15e-17
8.2	4.12655	1.15e-17
8.21	4.12141	1.15e-17
8.22	4.11627	1.15e-17
8.23	4.11114	1.15e-17
8.24	4.106	1.15e-17
8.25	4.10086	1.15e-17
8.26	4.09573	1.15e-17
8.27	4.09059	1.14e-17
8.28	4.08545	1.14e-17
8.29	4.08032	1.14e-17
8.3	4.07518	1.14e-17
8.31	4.07004	1.14e-17
8.32	4.0649	1.14e-17
8.33	4.05977	1.14e-17
8.34	4.05463	1.14e-17
8.35	4.04949	1.14e-17
8.36	4.04436	1.14e-17
8.37	4.03922	1.14e-17
8.38	4.03408	1.14e-17
8.39	4.02895	1.14e-17
8.4	4.02381	1.14e-17
8.41	4.01867	1.14e-17
8.42	4.01353	1.14e-17
8.43	4.0084	1.14e-17
8.44	4.00326	1.14e-17
8.45	3.99812	1.14e-17
8.46	3.99299	1.14e-17
8.47	3.98785	1.14e-17
8.48	3.98271	1.14e-17
8.49	3.97758	1.14e-17
8.5	3.97244	1.14e-17
8.51	3.9673	1.14e-17
8.52	3.96217	1.14e-17
8.53	3.95703	1.14e-17
8.54	3.95189	1.14e-17
8.55	3.94675	1.14e-17
8.56	3.94162	1.14e-17
8.57	3.93648	1.14e-17
8.58	3.93134	1.14e-17
8.59	3.92621	1.14e-17
8.6	3.92107	1.14e-17
8.61	3.91593	1.14e-17
8.62	3.9108	1.14e-17
8.63	3.90566	1.14e-17
8.64	3.90052	1.14e-17
8.65	3.89538	1.14e-17
8.66	3.89025	1.14e-17
8.67	3.88511	1.14e-17
8.68	3.87997	1.14e-17
8.69	3.87484	1.14e-17
8.7	3.8697	1.14e-17
8.71	3.86456	1.14e-17
8.72	3.85943	1.14e-17
8.73	3.85429	1.14e-17
8.74	3.84915	1.14e-17
8.75	3.84401	1.14e-17
8.76	3.83888	1.14e-17
8.77	3.83374	1.14e-17
8.78	3.8286	1.14e-17
8.79	3.82347	1.14e-17
8.8	3.81833	1.14e-17
8.81	3.81319	1.14e-17
8.82	3.80806	1.14e-17
8.83	3.80292	1.14e-17
8.84	3.79778	1.14e-17
8.85	3.79265	1.14e-17
8.86	3.78751	1.14e-17
8.87	3.78237	1.14e-17
8.88	3.77723	1.14e-17
8.89	3.7721	1.14e-17
8.9	3.76696	1.14e-17
8.91	3.76182	1.14e-17
8.92	3.75669	1.14e-17
8.93	3.75155	1.14e-17
8.94	3.74641	1.14e-17
8.95	3.74128	1.14e-17
8.96	3.73614	1.14e-17
8.97	3.731	1.14e-17
8.98	3.72586	1.14e-17
8.99	3.72073	1.14e-17
9	3.71559	1.14e-17
9.01	3.71045	1.14e-17
9.02	3.70532	1.14e-17
9.03	3.70018	1.14e-17
9.04	3.69504	1.14e-17
9.05	3.68991	1.14e-17
9.06	3.68477	1.14e-17
9.07	3.67963	1.14e-17
9.08	3.67449	1.14e-17
9.09	3.66936	1.14e-17
9.1	3.66422	1.14e-17
9.11	3.65908	1.14e-17
9.12	3.65395	1.14e-17
9.13	3.64881	1.14e-17
9.14	3.64367	1.14e-17
9.15	3.63854	1.14e-17
9.16	3.6334	1.14e-17
9.17	3.62826	1.14e-17
9.18	3.62312	1.14e-17
9.19	3.61799	1.14e-17
9.2	3.61285	1.14e-17
9.21	3.60771	1.14e-17
9.22	3.60258	1.14e-17
9.23	3.59744	1.14e-17
9.24	3.5923	1.14e-17
9.25	3.58717	1.14e-17
9.26	3.58203	1.14e-17
9.27	3.57689	1.14e-17
9.28	3.57176	1.14e-17
9.29	3.56662	1.14e-17
9.3	3.56148	1.14e-17
9.31	3.55634	1.14e-17
9.32	3.55121	1.14e-17
9.33	3.54607	1.14e-17
9.34	3.54093	1.14e-17
9.35	3.5358	1.14e-17
9.36	3.53066	1.14e-17
9.37	3.52552	1.14e-17
9.38	3.52039	1.14e-17
9.39	3.51525	1.14e-17
9.4	3.51011	1.14e-17
9.41	3.50497	1.14e-17
9.42	3.49984	1.14e-17
9.43	3.4947	1.14e-17
9.44	3.48956	1.14e-17
9.45	3.48443	1.14e-17
9.46	3.47929	1.14e-17
9.47	3.47415	1.14e-17
9.48	3.46902	1.14e-17
9.49	3.46388	1.14e-17
9.5	3.45874	1.14e-17
9.51	3.4536	1.14e-17
9.52	3.44847	1.14e-17
9.53	3.44333	1.14e-17
9.54	3.43819	1.14e-17
9.55	3.43306	1.14e-17
9.56	3.42792	1.14e-17
9.57	3.42278	1.14e-17
9.58	3.41765	1.14e-17
9.59	3.41251	1.14e-17
9.6	3.40737	1.14e-17
9.61	3.40224	1.14e-17
9.62	3.3971	1.14e-17
9.63	3.39196	1.14e-17
9.64	3.38682	1.14e-17
9.65	3.38169	1.14e-17
9.66	3.37655	1.14e-17
9.67	3.37141	1.14e-17
9.68	3.36628	1.14e-17
9.69	3.36114	1.14e-17
9.7	3.356	1.14e-17
9.71	3.35087	1.14e-17
9.72	3.34573	1.14e-17
9.73	3.34059	1.14e-17
9.74	3.33545	1.14e-17
9.75	3.33032	1.14e-17
9.76	3.32518	1.14e-17
9.77	3.32004	1.14e-17
9.78	3.31491	1.14e-17
9.79	3.30977	1.14e-17
9.8	3.30463	1.14e-17
9.81	3.2995	1.14e-17
9.82	3.29436	1.14e-17
9.83	3.28922	1.14e-17
9.84	3.28408	1.14e-17
9.85	3.27895	1.14e-17
9.86	3.27381	1.14e-17
9.87	3.26867	1.14e-17
9.88	3.26354	1.14e-17
9.89	3.2584	1.14e-17
9.9	3.25326	1.14e-17
9.91	3.24813	1.14e-17
9.92	3.24299	1.14e-17
9.93	3.23785	1.14e-17
9.94	3.23272	1.14e-17
9.95	3.22758	1.14e-17
9.96	3.22244	1.14e-17
9.97	3.2173	1.14e-17
9.98	3.21217	1.14e-17
9.99	3.20703	1.14e-17
10	3.20189	1.14e-17
10.01	3.19676	1.14e-17
10.02	3.19162	1.14e-17
10.03	3.18648	1.14e-17
10.04	3.18135	1.14e-17
10.05	3.17621	1.14e-17
10.06	3.17107	1.14e-17
10.07	3.16593	1.14e-17
10.08	3.1608	1.14e-17
10.09	3.15566	1.14e-17
10.1	3.15052	1.14e-17
10.11	3.14539	1.14e-17
10.12	3.14025	1.14e-17
10.13	3.13511	1.14e-17
10.14	3.12998	1.14e-17
10.15	3.12484	1.14e-17
10.16	3.1197	1.14e-17
10.17	3.11456	1.14e-17
10.18	3.10943	1.14e-17
10.19	3.10429	1.14e-17
10.2	3.09915	1.14e-17
10.21	3.09402	1.14e-17
10.22	3.08888	1.14e-17
10.23	3.08374	1.14e-17
10.24	3.07861	1.14e-17
10.25	3.07347	1.14e-17
10.26	3.06833	1.14e-17
10.27	3.0632	1.14e-17
10.28	3.05806	1.14e-17
10.29	3.05292	1.14e-17
10.3	3.04778	1.14e-17
10.31	3.04265	1.14e-17
10.32	3.03751	1.14e-17
10.33	3.03237	1.14e-17
10.34	3.02724	1.14e-17
10.35	3.0221	1.14e-17
10.36	3.01696	1.14e-17
10.37	3.01183	1.14e-17
10.38	3.00669	1.14e-17
10.39	3.00155	1.14e-17
10.4	2.99641	1.14e-17
10.41	2.99128	1.14e-17
10.42	2.98614	1.14e-17
10.43	2.981	1.14e-17
10.44	2.97587	1.14e-17
10.45	2.97073	1.14e-17
10.46	2.96559	1.14e-17
10.47	2.96046	1.14e-17
10.48	2.95532	1.14e-17
10.49	2.95018	1.14e-17
10.5	2.94504	1.14e-17
10.51	2.93991	1.14e-17
10.52	2.93477	1.14e-17
10.53	2.92963	1.14e-17
10.54	2.9245	1.14e-17
10.55	2.91936	1.14e-17
10.56	2.91422	1.14e-17
10.57	2.90909	1.14e-17
10.58	2.90395	1.14e-17
10.59	2.89881	1.14e-17
10.6	2.89368	1.14e-17
10.61	2.88854	1.14e-17
10.62	2.8834	1.14e-17
10.63	2.87826	1.14e-17
10.64	2.87313	1.14e-17
10.65	2.86799	1.14e-17
10.66	2.86285	1.14e-17
10.67	2.85772	1.14e-17
10.68	2.85258	1.14e-17
10.69	2.84744	1.14e-17
10.7	2.84231	1.14e-17
10.71	2.83717	1.14e-17
10.72	2.83203	1.14e-17
10.73	2.82689	1.14e-17
10.74	2.82176	1.14e-17
10.75	2.81662	1.14e-17
10.76	2.81148	1.14e-17
10.77	2.80635	1.14e-17
10.78	2.80121	1.14e-17
10.79	2.79607	1.14e-17
10.8	2.79094	1.14e-17
10.81	2.7858	1.14e-17
10.82	2.78066	1.14e-17
10.83	2.77552	1.14e-17
10.84	2.77039	1.14e-17
10.85	2.76525	1.14e-17
10.86	2.76011	1.14e-17
10.87	2.75498	1.14e-17
10.88	2.74984	1.14e-17
10.89	2.7447	1.14e-17
10.9	2.73957	1.14e-17
10.91	2.73443	1.14e-17
10.92	2.72929	1.14e-17
10.93	2.72415	1.14e-17
10.94	2.71902	1.14e-17
10.95	2.71388	1.14e-17
10.96	2.70874	1.14e-17
10.97	2.70361	1.14e-17
10.98	2.69847	1.14e-17
10.99	2.69333	1.14e-17
11	2.6882	1.14e-17
11.01	2.68306	1.14e-17
11.02	2.67792	1.14e-17
11.03	2.67279	1.14e-17
11.04	2.66765	1.14e-17
11.05	2.66251	1.14e-17
11.06	2.65737	1.14e-17
11.07	2.65224	1.14e-17
11.08	2.6471	1.14e-17
11.09	2.64196	1.14e-17
11.1	2.63683	1.14e-17
11.11	2.63169	1.14e-17
11.12	2.62655	1.14e-17
11.13	2.62142	1.14e-17
11.14	2.61628	1.14e-17
11.15	2.61114	1.14e-17
11.16	2.606	1.14e-17
11.17	2.60087	1.14e-17
11.18	2.59573	1.14e-17
11.19	2.59059	1.14e-17
11.2	2.58546	1.14e-17
11.21	2.58032	1.14e-17
11.22	2.57518	1.14e-17
11.23	2.57005	1.14e-17
11.24	2.56491	1.14e-17
11.25	2.55977	1.14e-17
11.26	2.55463	1.14e-17
11.27	2.5495	1.14e-17
11.28	2.54436	1.14e-17
11.29	2.53922	1.14e-17
11.3	2.53409	1.14e-17
11.31	2.52895	1.14e-17
11.32	2.52381	1.14e-17
11.33	2.51868	1.14e-17
11.34	2.51354	1.14e-17
11.35	2.5084	1.14e-17
11.36	2.50327	1.14e-17
11.37	2.49813	1.14e-17
11.38	2.49299	1.14e-17
11.39	2.48785	1.14e-17
11.4	2.48272	1.14e-17
11.41	2.47758	1.14e-17
11.42	2.47244	1.14e-17
11.43	2.46731	1.14e-17
11.44	2.46217	1.14e-17
11.45	2.45703	1.14e-17
11.46	2.4519	1.14e-17
11.47	2.44676	1.14e-17
11.48	2.44162	1.14e-17
11.49	2.43648	1.14e-17
11.5	2.43135	1.14e-17
11.51	2.42621	1.14e-17
11.52	2.42107	1.14e-17
11.53	2.41594	1.14e-17
11.54	2.4108	1.14e-17
11.55	2.40566	1.14e-17
11.56	2.40053	1.14e-17
11.57	2.39539	1.14e-17
11.58	2.39025	1.14e-17
11.59	2.38511	1.14e-17
11.6	2.37998	1.14e-17
11.61	2.37484	1.14e-17
11.62	2.3697	1.14e-17
11.63	2.36457	1.14e-17
11.64	2.35943	1.14e-17
11.65	2.35429	1.14e-17
11.66	2.34916	1.14e-17
11.67	2.34402	1.14e-17
11.68	2.33888	1.14e-17
11.69	2.33375	1.14e-17
11.7	2.32861	1.14e-17
11.71	2.32347	1.14e-17
11.72	2.31833	1.14e-17
11.73	2.3132	1.14e-17
11.74	2.30806	1.14e-17
11.75	2.30292	1.14e-17
11.76	2.29779	1.14e-17
11.77	2.29265	1.14e-17
11.78	2.28751	1.14e-17
11.79	2.28238	1.14e-17
11.8	2.27724	1.14e-17
11.81	2.2721	1.14e-17
11.82	2.26696	1.14e-17
11.83	2.26183	1.14e-17
11.84	2.25669	1.14e-17
11.85	2.25155	1.14e-17
11.86	2.24642	1.14e-17
11.87	2.24128	1.14e-17
11.88	2.23614	1.14e-17
11.89	2.23101	1.14e-17
11.9	2.22587	1.14e-17
11.91	2.22073	1.14e-17
11.92	2.21559	1.14e-17
11.93	2.21046	1.14e-17
11.94	2.20532	1.14e-17
11.95	2.20018	1.14e-17
11.96	2.19505	1.14e-17
11.97	2.18991	1.14e-17
11.98	2.18477	1.14e-17
11.99	2.17964	1.14e-17
12	2.1745	1.14e-17
12.01	2.16936	1.14e-17
12.02	2.16423	1.14e-17
12.03	2.15909	1.14e-17
12.04	2.15395	1.14e-17
12.05	2.14881	1.14e-17
12.06	2.14368	1.14e-17
12.07	2.13854	1.14e-17
12.08	2.1334	1.14e-17
12.09	2.12827	1.14e-17
12.1	2.12313	1.14e-17
12.11	2.11799	1.14e-17
12.12	2.11286	1.14e-17
12.13	2.10772	1.14e-17
12.14	2.10258	1.14e-17
12.15	2.09744	1.14e-17
12.16	2.09231	1.14e-17
12.17	2.08717	1.14e-17
12.18	2.08203	1.14e-17
12.19	2.0769	1.14e-17
12.2	2.07176	1.14e-17
12.21	2.06662	1.14e-17
12.22	2.06149	1.14e-17
12.23	2.05635	1.14e-17
12.24	2.05121	1.14e-17
12.25	2.04607	1.14e-17
12.26	2.04094	1.14e-17
12.27	2.0358	1.14e-17
12.28	2.03066	1.14e-17
12.29	2.02553	1.14e-17
12.3	2.02039	1.14e-17
12.31	2.01525	1.14e-17
12.32	2.01012	1.14e-17
12.33	2.00498	1.14e-17
12.34	1.99984	1.14e-17
12.35	1.99471	1.14e-17
12.36	1.98957	1.14e-17
12.37	1.98443	1.14e-17
12.38	1.97929	1.14e-17
12.39	1.97416	1.14e-17
12.4	1.96902	1.14e-17
12.41	1.96388	1.14e-17
12.42	1.95875	1.14e-17
12.43	1.95361	1.14e-17
12.44	1.94847	1.14e-17
12.45	1.94334	1.14e-17
12.46	1.9382	1.14e-17
12.47	1.93306	1.14e-17
12.48	1.92792	1.14e-17
12.49	1.92279	1.14e-17
12.5	1.91765	1.14e-17
12.51	1.91251	1.14e-17
12.52	1.90738	1.14e-17
12.53	1.90224	1.14e-17
12.54	1.8971	1.14e-17
12.55	1.89197	1.14e-17
12.56	1.88683	1.14e-17
12.57	1.88169	1.14e-17
12.58	1.87655	1.14e-17
12.59	1.87142	1.14e-17
12.6	1.86628	1.14e-17
12.61	1.86114	1.14e-17
12.62	1.85601	1.14e-17
12.63	1.85087	1.14e-17
12.64	1.84573	1.14e-17
12.65	1.8406	1.14e-17
12.66	1.83546	1.14e-17
12.67	1.83032	1.14e-17
12.68	1.82518	1.14e-17
12.69	1.82005	1.14e-17
12.7	1.81491	1.14e-17
12.71	1.80977	1.14e-17
12.72	1.80464	1.14e-17
12.73	1.7995	1.14e-17
12.74	1.79436	1.14e-17
12.75	1.78923	1.14e-17
12.76	1.78409	1.14e-17
12.77	1.77895	1.14e-17
12.78	1.77382	1.14e-17
12.79	1.76868	1.14e-17
12.8	1.76354	1.14e-17
12.81	1.7584	1.14e-17
12.82	1.75327	1.14e-17
12.83	1.74813	1.14e-17
12.84	1.74299	1.14e-17
12.85	1.73786	1.14e-17
12.86	1.73272	1.14e-17
12.87	1.72758	1.14e-17
12.88	1.72245	1.14e-17
12.89	1.71731	1.14e-17
12.9	1.71217	1.14e-17
12.91	1.70703	1.14e-17
12.92	1.7019	1.14e-17
12.93	1.69676	1.14e-17
12.94	1.69162	1.14e-17
12.95	1.68649	1.14e-17
12.96	1.68135	1.14e-17
12.97	1.67621	1.14e-17
12.98	1.67108	1.14e-17
12.99	1.66594	1.14e-17
13	1.6608	1.14e-17
13.01	1.65566	1.14e-17
13.02	1.65053	1.14e-17
13.03	1.64539	1.14e-17
13.04	1.64025	1.14e-17
13.05	1.63512	1.14e-17
13.06	1.62998	1.14e-17
13.07	1.62484	1.14e-17
13.08	1.61971	1.14e-17
13.09	1.61457	1.14e-17
13.1	1.60943	1.14e-17
13.11	1.6043	1.14e-17
13.12	1.59916	1.14e-17
13.13	1.59402	1.14e-17
13.14	1.58888	1.14e-17
13.15	1.58375	1.14e-17
13.16	1.57861	1.14e-17
13.17	1.57347	1.14e-17
13.18	1.56834	1.14e-17
13.19	1.5632	1.14e-17
13.2	1.55806	1.14e-17
13.21	1.55293	1.14e-17
13.22	1.54779	1.14e-17
13.23	1.54265	1.14e-17
13.24	1.53751	1.14e-17
13.25	1.53238	1.14e-17
13.26	1.52724	1.14e-17
13.27	1.5221	1.14e-17
13.28	1.51697	1.14e-17
13.29	1.51183	1.14e-17
13.3	1.50669	1.14e-17
13.31	1.50156	1.14e-17
13.32	1.49642	1.14e-17
13.33	1.49128	1.14e-17
13.34	1.48614	1.14e-17
13.35	1.48101	1.14e-17
13.36	1.47587	1.14e-17
13.37	1.47073	1.14e-17
13.38	1.4656	1.14e-17
13.39	1.46046	1.14e-17
13.4	1.45532	1.14e-17
13.41	1.45019	1.14e-17
13.42	1.44505	1.14e-17
13.43	1.43991	1.14e-17
13.44	1.43478	1.14e-17
13.45	1.42964	1.14e-17
13.46	1.4245	1.14e-17
13.47	1.41936	1.14e-17
13.48	1.41423	1.14e-17
13.49	1.40909	1.14e-17
13.5	1.40395	1.14e-17
13.51	1.39882	1.14e-17
13.52	1.39368	1.14e-17
13.53	1.38854	1.14e-17
13.54	1.38341	1.14e-17
13.55	1.37827	1.14e-17
13.56	1.37313	1.14e-17
13.57	1.36799	1.14e-17
13.58	1.36286	1.14e-17
13.59	1.35772	1.14e-17
13.6	1.35258	1.14e-17
13.61	1.34745	1.14e-17
13.62	1.34231	1.14e-17
13.63	1.33717	1.14e-17
13.64	1.33204	1.14e-17
13.65	1.3269	1.14e-17
13.66	1.32176	1.14e-17
13.67	1.31662	1.14e-17
13.68	1.31149	1.14e-17
13.69	1.30635	1.14e-17
13.7	1.30121	1.14e-17
13.71	1.29608	1.14e-17
13.72	1.29094	1.14e-17
13.73	1.2858	1.14e-17
13.74	1.28067	1.14e-17
13.75	1.27553	1.14e-17
13.76	1.27039	1.14e-17
13.77	1.26526	1.14e-17
13.78	1.26012	1.14e-17
13.79	1.25498	1.14e-17
13.8	1.24984	1.14e-17
13.81	1.24471	1.14e-17
13.82	1.23957	1.14e-17
13.83	1.23443	1.14e-17
13.84	1.2293	1.14e-17
13.85	1.22416	1.14e-17
13.86	1.21902	1.14e-17
13.87	1.21389	1.14e-17
13.88	1.20875	1.14e-17
13.89	1.20361	1.14e-17
13.9	1.19847	1.14e-17
13.91	1.19334	1.14e-17
13.92	1.1882	1.14e-17
13.93	1.18306	1.14e-17
13.94	1.17793	1.14e-17
13.95	1.17279	1.14e-17
13.96	1.16765	1.14e-17
13.97	1.16252	1.14e-17
13.98	1.15738	1.14e-17
13.99	1.15224	1.14e-17
14	1.1471	1.14e-17
14.01	1.14197	1.14e-17
14.02	1.13683	1.14e-17
14.03	1.13169	1.14e-17
14.04	1.12656	1.14e-17
14.05	1.12142	1.14e-17
14.06	1.11628	1.14e-17
14.07	1.11115	1.14e-17
14.08	1.10601	1.14e-17
14.09	1.10087	1.14e-17
14.1	1.09573	1.14e-17
14.11	1.0906	1.14e-17
14.12	1.08546	1.14e-17
14.13	1.08032	1.14e-17
14.14	1.07519	1.14e-17
14.15	1.07005	1.14e-17
14.16	1.06491	1.14e-17
14.17	1.05978	1.14e-17
14.18	1.05464	1.14e-17
14.19	1.0495	1.14e-17
14.2	1.04437	1.14e-17
14.21	1.03923	1.14e-17
14.22	1.03409	1.14e-17
14.23	1.02895	1.14e-17
14.24	1.02382	1.14e-17
14.25	1.01868	1.14e-17
14.26	1.01354	1.14e-17
14.27	1.00841	1.14e-17
14.28	1.00327	1.14e-17
14.29	0.998133	1.14e-17
14.3	0.992996	1.14e-17
14.31	0.987859	1.14e-17
14.32	0.982722	1.14e-17
14.33	0.977585	1.14e-17
14.34	0.972448	1.14e-17
14.35	0.967311	1.14e-17
14.36	0.962174	1.14e-17
14.37	0.957037	1.14e-17
14.38	0.9519	1.14e-17
14.39	0.946763	1.14e-17
14.4	0.941626	1.14e-17
14.41	0.936489	1.14e-17
14.42	0.931352	1.14e-17
14.43	0.926215	1.14e-17
14.44	0.921078	1.14e-17
14.45	0.915941	1.14e-17
14.46	0.910804	1.14e-17
14.47	0.905667	1.14e-17
14.48	0.90053	1.14e-17
14.49	0.895393	1.14e-17
14.5	0.890256	1.14e-17
14.51	0.885119	1.14e-17
14.52	0.879982	1.14e-17
14.53	0.874845	1.14e-17
14.54	0.869708	1.14e-17
14.55	0.864571	1.14e-17
14.56	0.859434	1.14e-17
14.57	0.854297	1.14e-17
14.58	0.84916	1.14e-17
14.59	0.844023	1.14e-17
14.6	0.838886	1.14e-17
14.61	0.833749	1.14e-17
14.62	0.828612	1.14e-17
14.63	0.823475	1.14e-17
14.64	0.818339	1.14e-17
14.65	0.813202	1.14e-17
14.66	0.808065	1.14e-17
14.67	0.802928	1.14e-17
14.68	0.797791	1.14e-17
14.69	0.792654	1.14e-17
14.7	0.787517	1.14e-17
14.71	0.78238	1.14e-17
14.72	0.777243	1.14e-17
14.73	0.772106	1.14e-17
14.74	0.766969	1.14e-17
14.75	0.761832	1.14e-17
14.76	0.756695	1.14e-17
14.77	0.751558	1.14e-17
14.78	0.746421	1.14e-17
14.79	0.741284	1.14e-17
14.8	0.736147	1.14e-17
14.81	0.73101	1.14e-17
14.82	0.725873	1.14e-17
14.83	0.720736	1.14e-17
14.84	0.715599	1.14e-17
14.85	0.710462	1.14e-17
14.86	0.705325	1.14e-17
14.87	0.700188	1.14e-17
14.88	0.695051	1.14e-17
14.89	0.689914	1.14e-17
14.9	0.684777	1.14e-17
14.91	0.67964	1.14e-17
14.92	0.674503	1.14e-17
14.93	0.669366	1.14e-17
14.94	0.664229	1.14e-17
14.95	0.659092	1.14e-17
14.96	0.653955	1.14e-17
14.97	0.648818	1.14e-17
14.98	0.643681	1.14e-17
14.99	0.638545	1.14e-17
15	0.633408	1.14e-17
15.01	0.628271	1.14e-17
15.02	0.623134	1.14e-17
15.03	0.617997	1.14e-17
15.04	0.61286	1.14e-17
15.05	0.607723	1.14e-17
15.06	0.602586	1.14e-17
15.07	0.597449	1.14e-17
15.08	0.592312	1.14e-17
15.09	0.587175	1.14e-17
15.1	0.582038	1.14e-17
15.11	0.576901	1.14e-17
15.12	0.571764	1.14e-17
15.13	0.566627	1.14e-17
15.14	0.56149	1.14e-17
15.15	0.556353	1.14e-17
15.16	0.551216	1.14e-17
15.17	0.546079	1.14e-17
15.18	0.540942	1.14e-17
15.19	0.535805	1.14e-17
15.2	0.530668	1.14e-17
15.21	0.525531	1.14e-17
15.22	0.520394	1.14e-17
15.23	0.515257	1.14e-17
15.24	0.51012	1.14e-17
15.25	0.504983	1.14e-17
15.26	0.499846	1.14e-17
15.27	0.494709	1.14e-17
15.28	0.489572	1.14e-17
15.29	0.484435	1.14e-17
15.3	0.479298	1.14e-17
15.31	0.474161	1.14e-17
15.32	0.469024	1.14e-17
15.33	0.463887	1.14e-17
15.34	0.458751	1.14e-17
15.35	0.453614	1.14e-17
15.36	0.448477	1.14e-17
15.37	0.44334	1.14e-17
15.38	0.438203	1.14e-17
15.39	0.433066	1.14e-17
15.4	0.427929	1.14e-17
15.41	0.422792	1.14e-17
15.42	0.417655	1.14e-17
15.43	0.412518	1.14e-17
15.44	0.407381	1.14e-17
15.45	0.402244	1.14e-17
15.46	0.397107	1.14e-17
15.47	0.39197	1.14e-17
15.48	0.386833	1.14e-17
15.49	0.381696	1.14e-17
15.5	0.376559	1.14e-17
15.51	0.371422	1.14e-17
15.52	0.366285	1.14e-17
15.53	0.361148	1.14e-17
15.54	0.356011	1.14e-17
15.55	0.350874	1.14e-17
15.56	0.345737	1.14e-17
15.57	0.3406	1.14e-17
15.58	0.335463	1.14e-17
15.59	0.330326	1.14e-17
15.6	0.325189	1.14e-17
15.61	0.320052	1.14e-17
15.62	0.314915	1.14e-17
15.63	0.309778	1.14e-17
15.64	0.304641	1.14e-17
15.65	0.299504	1.14e-17
15.66	0.294367	1.14e-17
15.67	0.28923	1.14e-17
15.68	0.284093	1.14e-17
15.69	0.278957	1.14e-17
15.7	0.27382	1.14e-17
15.71	0.268683	1.14e-17
15.72	0.263546	1.14e-17
15.73	0.258409	1.14e-17
15.74	0.253272	1.14e-17
15.75	0.248135	1.14e-17
15.76	0.242998	1.14e-17
15.77	0.237861	1.14e-17
15.78	0.232724	1.14e-17
15.79	0.227587	1.14e-17
15.8	0.22245	1.14e-17
15.81	0.217313	1.14e-17
15.82	0.212176	1.14e-17
15.83	0.207039	1.14e-17
15.84	0.201902	1.14e-17
15.85	0.196765	1.14e-17
15.86	0.191628	1.14e-17
15.87	0.186491	1.14e-17
15.88	0.181354	1.14e-17
15.89	0.176217	1.14e-17
15.9	0.17108	1.14e-17
15.91	0.165943	1.14e-17
15.92	0.160806	1.14e-17
15.93	0.155669	1.14e-17
15.94	0.150532	1.14e-17
15.95	0.145395	1.14e-17
15.96	0.140258	1.14e-17
15.97	0.135121	1.14e-17
15.98	0.129984	1.14e-17
15.99	0.124847	1.14e-17
16	0.11971	1.14e-17
16.01	0.114573	1.14e-17
16.02	0.109436	1.14e-17
16.03	0.104299	1.14e-17
16.04	0.0991625	1.14e-17
16.05	0.0940255	1.14e-17
16.06	0.0888886	1.14e-17
16.07	0.0837516	1.14e-17
16.08	0.0786146	1.14e-17
16.09	0.0734777	1.14e-17
16.1	0.0683407	1.14e-17
16.11	0.0632037	1.14e-17
16.12	0.0580667	1.14e-17
16.13	0.0529298	1.14e-17
16.14	0.0477928	1.14e-17
16.15	0.0426558	1.14e-17
16.16	0.0375189	1.14e-17
16.17	0.0323819	1.14e-17
16.18	0.0272449	1.14e-17
16.19	0.0221079	1.14e-17
16.2	0.016971	1.14e-17
16.21	0.011834	1.14e-17
16.22	0.00669702	1.14e-17
16.23	0.00156005	1.14e-17
16.24	-0.00357692	1.14e-17
16.25	-0.00871389	1.14e-17
16.26	-0.0138509	1.14e-17
16.27	-0.0189878	1.14e-17
16.28	-0.0241248	1.14e-17
16.29	-0.0292618	1.14e-17
16.3	-0.0343987	1.14e-17
16.31	-0.0395357	1.14e-17
16.32	-0.0446727	1.14e-17
16.33	-0.0498097	1.14e-17
16.34	-0.0549466	1.14e-17
16.35	-0.0600836	1.14e-17
16.36	-0.0652206	1.14e-17
16.37	-0.0703575	1.14e-17
16.38	-0.0754945	1.14e-17
16.39	-0.0806315	1.14e-17
16.4	-0.0857685	1.14e-17
16.41	-0.0909054	1.14e-17
16.42	-0.0960424	1.14e-17
16.43	-0.101179	1.14e-17
16.44	-0.106316	1.14e-17
16.45	-0.111453	1.14e-17
16.46	-0.11659	1.14e-17
16.47	-0.121727	1.14e-17
16.48	-0.126864	1.14e-17
16.49	-0.132001	1.14e-17
16.5	-0.137138	1.14e-17
16.51	-0.142275	1.14e-17
16.52	-0.147412	1.14e-17
16.53	-0.152549	1.14e-17
16.54	-0.157686	1.14e-17
16.55	-0.162823	1.14e-17
16.56	-0.16796	1.14e-17
16.57	-0.173097	1.14e-17
16.58	-0.178234	1.14e-17
16.59	-0.183371	1.14e-17
16.6	-0.188508	1.14e-17
16.61	-0.193645	1.14e-17
16.62	-0.198782	1.14e-17
16.63	-0.203919	1.14e-17
16.64	-0.209056	1.14e-17
16.65	-0.214193	1.14e-17
16.66	-0.21933	1.14e-17
16.67	-0.224467	1.14e-17
16.68	-0.229604	1.14e-17
16.69	-0.234741	1.14e-17
16.7	-0.239878	1.14e-17
16.71	-0.245015	1.14e-17
16.72	-0.250152	1.14e-17
16.73	-0.255289	1.14e-17
16.74	-0.260425	1.14e-17
16.75	-0.265562	1.14e-17
16.76	-0.270699	1.14e-17
16.77	-0.275836	1.14e-17
16.78	-0.280973	1.14e-17
16.79	-0.28611	1.14e-17
16.8	-0.291247	1.14e-17
16.81	-0.296384	1.14e-17
16.82	-0.301521	1.14e-17
16.83	-0.306658	1.14e-17
16.84	-0.311795	1.14e-17
16.85	-0.316932	1.14e-17
16.86	-0.322069	1.14e-17
16.87	-0.327206	1.14e-17
16.88	-0.332343	1.14e-17
16.89	-0.33748	1.14e-17
16.9	-0.342617	1.14e-17
16.91	-0.347754	1.14e-17
16.92	-0.352891	1.14e-17
16.93	-0.358028	1.14e-17
16.94	-0.363165	1.14e-17
16.95	-0.368302	1.14e-17
16.96	-0.373439	1.14e-17
16.97	-0.378576	1.14e-17
16.98	-0.383713	1.14e-17
16.99	-0.38885	1.14e-17
17	-0.393987	1.14e-17
17.01	-0.399124	1.14e-17
17.02	-0.404261	1.14e-17
17.03	-0.409398	1.14e-17
17.04	-0.414535	1.14e-17
17.05	-0.419672	1.14e-17
17.06	-0.424809	1.14e-17
17.07	-0.429946	1.14e-17
17.08	-0.435083	1.14e-17
17.09	-0.440219	1.14e-17
17.1	-0.445356	1.14e-17
17.11	-0.450493	1.14e-17
17.12	-0.45563	1.14e-17
17.13	-0.460767	1.14e-17
17.14	-0.465904	1.14e-17
17.15	-0.471041	1.14e-17
17.16	-0.476178	1.14e-17
17.17	-0.481315	1.14e-17
17.18	-0.486452	1.14e-17
17.19	-0.491589	1.14e-17
17.2	-0.496726	1.14e-17
17.21	-0.501863	1.14e-17
17.22	-0.507	1.14e-17
17.23	-0.512137	1.14e-17
17.24	-0.517274	1.14e-17
17.25	-0.522411	1.14e-17
17.26	-0.527548	1.14e-17
17.27	-0.532685	1.14e-17
17.28	-0.537822	1.14e-17
17.29	-0.542959	1.14e-17
17.3	-0.548096	1.14e-17
17.31	-0.553233	1.14e-17
17.32	-0.55837	1.14e-17
17.33	-0.563507	1.14e-17
17.34	-0.568644	1.14e-17
17.35	-0.573781	1.14e-17
17.36	-0.578918	1.14e-17
17.37	-0.584055	1.14e-17
17.38	-0.589192	1.14e-17
17.39	-0.594329	1.14e-17
17.4	-0.599466	1.14e-17
17.41	-0.604603	1.14e-17
17.42	-0.60974	1.14e-17
17.43	-0.614877	1.14e-17
17.44	-0.620013	1.14e-17
17.45	-0.62515	1.14e-17
17.46	-0.630287	1.14e-17
17.47	-0.635424	1.14e-17
17.48	-0.640561	1.14e-17
17.49	-0.645698	1.14e-17
17.5	-0.650835	1.14e-17
17.51	-0.655972	1.14e-17
17.52	-0.661109	1.14e-17
17.53	-0.666246	1.14e-17
17.54	-0.671383	1.14e-17
17.55	-0.67652	1.14e-17
17.56	-0.681657	1.14e-17
17.57	-0.686794	1.14e-17
17.58	-0.691931	1.14e-17
17.59	-0.697068	1.14e-17
17.6	-0.702205	1.14e-17
17.61	-0.707342	1.14e-17
17.62	-0.712479	1.14e-17
17.63	-0.717616	1.14e-17
17.64	-0.722753	1.14e-17
17.65	-0.72789	1.14e-17
17.66	-0.733027	1.14e-17
17.67	-0.738164	1.14e-17
17.68	-0.743301	1.14e-17
17.69	-0.748438	1.14e-17
17.7	-0.753575	1.14e-17
17.71	-0.758712	1.14e-17
17.72	-0.763849	1.14e-17
17.73	-0.768986	1.14e-17
17.74	-0.774123	1.14e-17
17.75	-0.77926	1.14e-17
17.76	-0.784397	1.14e-17
17.77	-0.789534	1.14e-17
17.78	-0.794671	1.14e-17
17.79	-0.799808	1.14e-17
17.8	-0.804944	1.14e-17
17.81	-0.810081	1.14e-17
17.82	-0.815218	1.14e-17
17.83	-0.820355	1.14e-17
17.84	-0.825492	1.14e-17
17.85	-0.830629	1.14e-17
17.86	-0.835766	1.14e-17
17.87	-0.840903	1.14e-17
17.88	-0.84604	1.14e-17
17.89	-0.851177	1.14e-17
17.9	-0.856314	1.14e-17
17.91	-0.861451	1.14e-17
17.92	-0.866588	1.14e-17
17.93	-0.871725	1.14e-17
17.94	-0.876862	1.14e-17
17.95	-0.881999	1.14e-17
17.96	-0.887136	1.14e-17
17.97	-0.892273	1.14e-17
17.98	-0.89741	1.14e-17
17.99	-0.902547	1.14e-17
18	-0.907684	1.14e-17
18.01	-0.912821	1.14e-17
18.02	-0.917958	1.14e-17
18.03	-0.923095	1.14e-17
18.04	-0.928232	1.14e-17
18.05	-0.933369	1.14e-17
18.06	-0.938506	1.14e-17
18.07	-0.943643	1.14e-17
18.08	-0.94878	1.14e-17
18.09	-0.953917	1.14e-17
18.1	-0.959054	1.14e-17
18.11	-0.964191	1.14e-17
18.12	-0.969328	1.14e-17
18.13	-0.974465	1.14e-17
18.14	-0.979602	1.14e-17
18.15	-0.984738	1.14e-17
18.16	-0.989875	1.14e-17
18.17	-0.995012	1.14e-17
18.18	-1.00015	1.14e-17
18.19	-1.00529	1.14e-17
18.2	-1.01042	1.14e-17
18.21	-1.01556	1.14e-17
18.22	-1.0207	1.14e-17
18.23	-1.02583	1.14e-17
18.24	-1.03097	1.14e-17
18.25	-1.03611	1.14e-17
18.26	-1.04125	1.14e-17
18.27	-1.04638	1.14e-17
18.28	-1.05152	1.14e-17
18.29	-1.05666	1.14e-17
18.3	-1.06179	1.14e-17
18.31	-1.06693	1.14e-17
18.32	-1.07207	1.14e-17
18.33	-1.0772	1.14e-17
18.34	-1.08234	1.14e-17
18.35	-1.08748	1.14e-17
18.36	-1.09261	1.14e-17
18.37	-1.09775	1.14e-17
18.38	-1.10289	1.14e-17
18.39	-1.10803	1.14e-17
18.4	-1.11316	1.14e-17
18.41	-1.1183	1.14e-17
18.42	-1.12344	1.14e-17
18.43	-1.12857	1.14e-17
18.44	-1.13371	1.14e-17
18.45	-1.13885	1.14e-17
18.46	-1.14398	1.14e-17
18.47	-1.14912	1.14e-17
18.48	-1.15426	1.14e-17
18.49	-1.1594	1.14e-17
18.5	-1.16453	1.14e-17
18.51	-1.16967	1.14e-17
18.52	-1.17481	1.14e-17
18.53	-1.17994	1.14e-17
18.54	-1.18508	1.14e-17
18.55	-1.19022	1.14e-17
18.56	-1.19535	1.14e-17
18.57	-1.20049	1.14e-17
18.58	-1.20563	1.14e-17
18.59	-1.21077	1.14e-17
18.6	-1.2159	1.14e-17
18.61	-1.22104	1.14e-17
18.62	-1.22618	1.14e-17
18.63	-1.23131	1.14e-17
18.64	-1.23645	1.14e-17
18.65	-1.24159	1.14e-17
18.66	-1.24672	1.14e-17
18.67	-1.25186	1.14e-17
18.68	-1.257	1.14e-17
18.69	-1.26213	1.14e-17
18.7	-1.26727	1.14e-17
18.71	-1.27241	1.14e-17
18.72	-1.27755	1.14e-17
18.73	-1.28268	1.14e-17
18.74	-1.28782	1.14e-17
18.75	-1.29296	1.14e-17
18.76	-1.29809	1.14e-17
18.77	-1.30323	1.14e-17
18.78	-1.30837	1.14e-17
18.79	-1.3135	1.14e-17
18.8	-1.31864	1.14e-17
18.81	-1.32378	1.14e-17
18.82	-1.32892	1.14e-17
18.83	-1.33405	1.14e-17
18.84	-1.33919	1.14e-17
18.85	-1.34433	1.14e-17
18.86	-1.34946	1.14e-17
18.87	-1.3546	1.14e-17
18.88	-1.35974	1.14e-17
18.89	-1.36487	1.14e-17
18.9	-1.37001	1.14e-17
18.91	-1.37515	1.14e-17
18.92	-1.38029	1.14e-17
18.93	-1.38542	1.14e-17
18.94	-1.39056	1.14e-17
18.95	-1.3957	1.14e-17
18.96	-1.40083	1.14e-17
18.97	-1.40597	1.14e-17
18.98	-1.41111	1.14e-17
18.99	-1.41624	1.14e-17
19	-1.42138	1.14e-17
19.01	-1.42652	1.14e-17
19.02	-1.43166	1.14e-17
19.03	-1.43679	1.14e-17
19.04	-1.44193	1.14e-17
19.05	-1.44707	1.14e-17
19.06	-1.4522	1.14e-17
19.07	-1.45734	1.14e-17
19.08	-1.46248	1.14e-17
19.09	-1.46761	1.14e-17
19.1	-1.47275	1.14e-17
19.11	-1.47789	1.14e-17
19.12	-1.48302	1.14e-17
19.13	-1.48816	1.14e-17
19.14	-1.4933	1.14e-17
19.15	-1.49844	1.14e-17
19.16	-1.50357	1.14e-17
19.17	-1.50871	1.14e-17
19.18	-1.51385	1.14e-17
19.19	-1.51898	1.14e-17
19.2	-1.52412	1.14e-17
19.21	-1.52926	1.14e-17
19.22	-1.53439	1.14e-17
19.23	-1.53953	1.14e-17
19.24	-1.54467	1.14e-17
19.25	-1.54981	1.14e-17
19.26	-1.55494	1.14e-17
19.27	-1.56008	1.14e-17
19.28	-1.56522	1.14e-17
19.29	-1.57035	1.14e-17
19.3	-1.57549	1.14e-17
19.31	-1.58063	1.14e-17
19.32	-1.58576	1.14e-17
19.33	-1.5909	1.14e-17
19.34	-1.59604	1.14e-17
19.35	-1.60118	1.14e-17
19.36	-1.60631	1.14e-17
19.37	-1.61145	1.14e-17
19.38	-1.61659	1.14e-17
19.39	-1.62172	1.14e-17
19.4	-1.62686	1.14e-17
19.41	-1.632	1.14e-17
19.42	-1.63713	1.14e-17
19.43	-1.64227	1.14e-17
19.44	-1.64741	1.14e-17
19.45	-1.65254	1.14e-17
19.46	-1.65768	1.14e-17
19.47	-1.66282	1.14e-17
19.48	-1.66796	1.14e-17
19.49	-1.67309	1.14e-17
19.5	-1.67823	1.14e-17
19.51	-1.68337	1.14e-17
19.52	-1.6885	1.14e-17
19.53	-1.69364	1.14e-17
19.54	-1.69878	1.14e-17
19.55	-1.70391	1.14e-17
19.56	-1.70905	1.14e-17
19.57	-1.71419	1.14e-17
19.58	-1.71933	1.14e-17
19.59	-1.72446	1.14e-17
19.6	-1.7296	1.14e-17
19.61	-1.73474	1.14e-17
19.62	-1.73987	1.14e-17
19.63	-1.74501	1.14e-17
19.64	-1.75015	1.14e-17
19.65	-1.75528	1.14e-17
19.66	-1.76042	1.14e-17
19.67	-1.76556	1.14e-17
19.68	-1.7707	1.14e-17
19.69	-1.77583	1.14e-17
19.7	-1.78097	1.14e-17
19.71	-1.78611	1.14e-17
19.72	-1.79124	1.14e-17
19.73	-1.79638	1.14e-17
19.74	-1.80152	1.14e-17
19.75	-1.80665	1.14e-17
19.76	-1.81179	1.14e-17
19.77	-1.81693	1.14e-17
19.78	-1.82206	1.14e-17
19.79	-1.8272	1.14e-17
19.8	-1.83234	1.14e-17
19.81	-1.83748	1.14e-17
19.82	-1.84261	1.14e-17
19.83	-1.84775	1.14e-17
19.84	-1.85289	1.14e-17
19.85	-1.85802	1.14e-17
19.86	-1.86316	1.14e-17
19.87	-1.8683	1.14e-17
19.88	-1.87343	1.14e-17
19.89	-1.87857	1.14e-17
19.9	-1.88371	1.14e-17
19.91	-1.88885	1.14e-17
19.92	-1.89398	1.14e-17
19.93	-1.89912	1.14e-17
19.94	-1.90426	1.14e-17
19.95	-1.90939	1.14e-17
19.96	-1.91453	1.14e-17
19.97	-1.91967	1.14e-17
19.98	-1.9248	1.14e-17
[truncated: 802 more rows]
