# Supplementary material for: Incomplete antiviral treatment may induce longer durations of viral shedding during SARS-CoV-2 infection
Source: Life Sci Alliance. 2021 Aug 3;4(10):e202101049. doi: 10.26508/lsa.202101049 (PMC8340032; doi:10.26508/lsa.202101049)
Supplement: Supplementary file 6 [file LSA-2021-01049_TableS3.docx]

**Table S3. Individual estimated parameters and initial values in lung**

| **Monkey ID** |  |  |  |  |  |
| --- | --- | --- | --- | --- | --- |
| Without treatment | | | | | |
| RM A |  |  |  |  |  |
| RM B |  |  |  |  |  |
| RM C |  |  |  |  |  |
| RM D |  |  |  |  |  |
| RM 7 |  |  |  |  |  |
| RM 8 |  |  |  |  |  |
| RM 9 |  |  |  |  |  |
| RM 10 |  |  |  |  |  |
| RM 11 |  |  |  |  |  |
| RM 12 |  |  |  |  |  |
| With treatment | | | | | |
| RM 1 |  |  |  |  |  |
| RM 2 |  |  |  |  |  |
| RM 3 |  |  |  |  |  |
| RM 4 |  |  |  |  |  |
| RM 6 |  |  |  |  |  |
