# Supplementary material for: Incomplete antiviral treatment may induce longer durations of viral shedding during SARS-CoV-2 infection
Source: Life Sci Alliance. 2021 Aug 3;4(10):e202101049. doi: 10.26508/lsa.202101049 (PMC8340032; doi:10.26508/lsa.202101049)
Supplement: Supplementary file 8 [file LSA-2021-01049_SdataFS3.xlsx]

## Sheet: FigS3_A(point)
Day	RM A(nose)	RM B(nose)	RM C(nose)	RM D(nose)	RM 7(nose)	RM8(nose)	RM 9(nose)	RM 10(nose)	RM 11(nose)	RM 12(nose)	RM A(throat)	RM D(throat)	RM 7(throat)	RM 8(throat)	RM 9(throat)	RM 10(throat)	RM 11(throat)	RM 12(throat)	RM A (green)	RM B (green)	RM C (green)	RM D (green)	RM7 (green)	RM8 (green)	RM9 (green)	RM10 (green)	RM11 (green)	RM12 (green)
0	0	0	0	0	0	0	0	0	0	0	0	0	0	0	0	0	0	0
1	7.08731	7.28211	6.82784	6.41735	6.32854	5.00322	6.20501	8.24323	6.15944	7.36075	5.36726	4.22213	4.75539	0	2.60529	5.77266	6.4662	8.56379	8.45484	7.1903	8.47158	8.38154	8.65365	6.87148	7.94392	8.31857	7.09849	8.01523
2					5.63984	7.11591	6.95236	7.26932	7.35853	7.72567			3.43359	3.33153	2.30639	6.57454	2.85745	4.44805
3	4.36519	6.95056	5.24216	4.45542	4.0225	5.84072	0	6.90447	5.46594	6.72455	0	0	3.82734	0	5.86791	3.49875	4.91024	6.39297	6.82431	5.5586	6.54926	6.20365	7.02051	5.79154	6.81815	7.16053	7.44818	6.92733
4					5.03227	4.7577	3.86166	6.11117	6.41862	6.30746			5.39472	4.60973	5.40351	5.81432	4.79371	6.07444
5	6.45668	5.16343	4.94702	3.23763	3.33721	1.58773	3.90835	2.89467	4.36701	5.18362	4.59516	0	4.02934	0	0	0	0	5.40237	5.72128	4.9321	5.9128	6.42225
6					1.98291	3.2437	4.17711	5.52945	3.91371	4.74489			5.40199	4.85145	3.52808	5.12354	5.27498	3.97632
7	4.02492	4.4805	3.60304	0	2.34414	0	4.82071	4.24074	0	2.14241	4.91799	4.51822	0	4.17506	2.94524	0	3.62356	0					5.07076	3.99831	3.5487	4.85826	5.00392	3.61616
10	2.9287	4.88026	4.43628	3.9207							3.18136	0
12	0	3.02649	3.7365	0							1.8161	5.46434
14	2.01536	0	1.69504	0							0	0
17	0	0	0	0							0	0
21	0	0	0	0							0	0

## Sheet: FigS3_A(line)
time	RM A(nose)	RM B(nose)	RM C(nose)	RM D(nose)	RM 7(nose)	RM8(nose)	RM 9(nose)	RM 10(nose)	RM 11(nose)	RM 12(nose)	RM A(throat)	RM D(throat)	RM 7(throat)	RM 8(throat)	RM 9(throat)	RM 10(throat)	RM 11(throat)	RM 12(throat)	RM A (green)	RM B (green)	RM C (green)	RM D (green)	RM7 (green)	RM8 (green)	RM9 (green)	RM10 (green)	RM11 (green)	RM12 (green)
0	2.7514	2.71363	2.57271	2.72162	2.80691	2.70302	2.64033	2.60103	2.66127	2.60438	2.68794	2.54791	2.75294	2.10336	1.90687	2.76028	3.01411	2.80094	2.60431	2.63496	2.61687	2.62391	2.60522	2.65042	2.60031	2.59183	2.6305	2.62886
0.001	2.75121	2.71352	2.57254	2.72127	2.80642	2.70255	2.64001	2.6009	2.66097	2.60418	2.68754	2.54747	2.75248	2.10288	1.90638	2.75987	3.0137	2.80055	2.60631	2.6359	2.61885	2.62588	2.60753	2.65139	2.6017	2.59394	2.63221	2.63025
0.002	2.75124	2.71371	2.5726	2.72109	2.80607	2.70219	2.63983	2.6011	2.66087	2.60428	2.68717	2.54703	2.75203	2.10241	1.9059	2.75949	3.01333	2.80022	2.61075	2.63828	2.62324	2.63026	2.61256	2.65383	2.60498	2.5986	2.63605	2.63352
0.003	2.7515	2.71422	2.57289	2.72105	2.80584	2.70196	2.63981	2.60163	2.66096	2.60467	2.68683	2.5466	2.75158	2.10194	1.90542	2.75914	3.01298	2.79996	2.61756	2.64207	2.62999	2.63698	2.62025	2.65771	2.6101	2.60572	2.642	2.63863
0.004	2.75198	2.71503	2.5734	2.72118	2.80574	2.70184	2.63994	2.60249	2.66125	2.60535	2.68651	2.54617	2.75114	2.10147	1.90496	2.75883	3.01267	2.79975	2.62667	2.64723	2.63902	2.64596	2.63049	2.663	2.61702	2.61524	2.64997	2.64553
0.005	2.75268	2.71614	2.57413	2.72146	2.80576	2.70184	2.64023	2.60367	2.66173	2.60631	2.68623	2.54574	2.7507	2.10101	1.9045	2.75855	3.0124	2.79961	2.63796	2.65374	2.65022	2.65711	2.64315	2.66966	2.62568	2.62703	2.65989	2.65415
0.006	2.7536	2.71756	2.57508	2.72189	2.8059	2.70196	2.64066	2.60517	2.6624	2.60756	2.68596	2.54532	2.75027	2.10056	1.90406	2.7583	3.01216	2.79953	2.65133	2.66155	2.66347	2.6703	2.65809	2.67765	2.63599	2.64097	2.67167	2.66442
0.007	2.75474	2.71928	2.57625	2.72248	2.80617	2.70219	2.64124	2.60698	2.66327	2.60909	2.68573	2.54491	2.74985	2.1001	1.90362	2.75808	3.01194	2.79952	2.66664	2.6706	2.67865	2.68541	2.67515	2.68691	2.64788	2.65692	2.6852	2.67626
0.008	2.75609	2.7213	2.57763	2.72321	2.80657	2.70255	2.64197	2.60912	2.66433	2.61089	2.68552	2.5445	2.74943	2.09966	1.9032	2.7579	3.01177	2.79956	2.68376	2.68085	2.69563	2.70231	2.69417	2.69739	2.66126	2.67472	2.70036	2.68959
0.009	2.75766	2.72361	2.57923	2.72411	2.80708	2.70301	2.64284	2.61156	2.66558	2.61298	2.68534	2.54409	2.74902	2.09921	1.90278	2.75774	3.01162	2.79967	2.70253	2.69222	2.71425	2.72085	2.71496	2.70901	2.67603	2.69423	2.71705	2.70429
0.01	2.75943	2.7262	2.58105	2.72515	2.80772	2.7036	2.64386	2.6143	2.66701	2.61533	2.68519	2.54369	2.74861	2.09877	1.90238	2.75762	3.01151	2.79983	2.72281	2.70466	2.73438	2.74089	2.73736	2.72173	2.69209	2.71529	2.73514	2.72029
0.011	2.76142	2.72908	2.58307	2.72634	2.80848	2.7043	2.64503	2.61735	2.66863	2.61795	2.68506	2.54329	2.74821	2.09834	1.90198	2.75753	3.01143	2.80006	2.74447	2.71811	2.75588	2.7623	2.76121	2.73546	2.70935	2.73774	2.75452	2.73748
0.012	2.76361	2.73223	2.5853	2.72767	2.80936	2.70511	2.64633	2.62068	2.67043	2.62083	2.68496	2.5429	2.74782	2.09791	1.9016	2.75747	3.01139	2.80034	2.76737	2.7325	2.77861	2.78493	2.78635	2.75015	2.72772	2.76146	2.77507	2.75577
0.013	2.76601	2.73566	2.58773	2.72915	2.81036	2.70603	2.64778	2.62431	2.67241	2.62397	2.68488	2.54251	2.74743	2.09748	1.90122	2.75744	3.01137	2.80069	2.79139	2.74777	2.80245	2.80868	2.81264	2.76573	2.74709	2.78631	2.79668	2.77507
0.014	2.7686	2.73936	2.59036	2.73078	2.81147	2.70707	2.64937	2.62822	2.67457	2.62737	2.68483	2.54213	2.74704	2.09706	1.90085	2.75744	3.01139	2.8011	2.81639	2.76385	2.82728	2.83341	2.83995	2.78213	2.76737	2.81215	2.81925	2.79528
0.015	2.77139	2.74332	2.5932	2.73255	2.8127	2.70821	2.6511	2.63241	2.67691	2.63101	2.68481	2.54175	2.74667	2.09664	1.9005	2.75748	3.01144	2.80156	2.84227	2.78068	2.85298	2.85902	2.86814	2.7993	2.7885	2.83888	2.84267	2.81632
0.016	2.77438	2.74753	2.59622	2.73446	2.81405	2.70947	2.65297	2.63686	2.67942	2.6349	2.68481	2.54138	2.7463	2.09623	1.90015	2.75754	3.01152	2.80208	2.86892	2.79821	2.87947	2.8854	2.8971	2.81716	2.81037	2.86639	2.86687	2.83812
0.017	2.77755	2.752	2.59944	2.73651	2.81551	2.71083	2.65497	2.64158	2.6821	2.63902	2.68484	2.54101	2.74593	2.09582	1.89981	2.75764	3.01163	2.80267	2.89627	2.81638	2.90664	2.91247	2.92675	2.83567	2.83292	2.89457	2.89175	2.86059
0.018	2.78091	2.75671	2.60284	2.7387	2.81709	2.7123	2.6571	2.64655	2.68494	2.64338	2.6849	2.54064	2.74557	2.09541	1.89949	2.75777	3.01178	2.80331	2.92421	2.83513	2.93441	2.94014	2.95698	2.85476	2.85608	2.92336	2.91724	2.88367
0.019	2.78446	2.76166	2.60643	2.74102	2.81877	2.71388	2.65936	2.65178	2.68795	2.64796	2.68498	2.54028	2.74521	2.09501	1.89917	2.75792	3.01196	2.804	2.95268	2.85441	2.96271	2.96834	2.98773	2.87439	2.87979	2.95267	2.94327	2.90729
0.02	2.78818	2.76684	2.61019	2.74347	2.82057	2.71556	2.66176	2.65725	2.69112	2.65277	2.68509	2.53992	2.74486	2.09462	1.89886	2.75811	3.01216	2.80476	2.98161	2.87418	2.99147	2.99701	3.01891	2.8945	2.90398	2.98243	2.96977	2.9314
0.021	2.79208	2.77225	2.61414	2.74606	2.82247	2.71735	2.66428	2.66295	2.69446	2.65779	2.68522	2.53957	2.74452	2.09422	1.89856	2.75833	3.0124	2.80557	3.01094	2.89439	3.02063	3.02607	3.05047	2.91506	2.9286	3.01258	2.99669	2.95594
0.022	2.79615	2.77787	2.61825	2.74877	2.82449	2.71924	2.66693	2.66888	2.69794	2.66302	2.68537	2.53923	2.74418	2.09384	1.89827	2.75858	3.01267	2.80644	3.04062	2.915	3.05014	3.05549	3.08237	2.93602	2.95361	3.04307	3.02398	2.98087
0.023	2.80039	2.78371	2.62254	2.75161	2.82661	2.72123	2.6697	2.67503	2.70158	2.66846	2.68556	2.53888	2.74385	2.09345	1.89799	2.75886	3.01298	2.80736	3.07061	2.93598	3.07996	3.08521	3.11454	2.95734	2.97896	3.07386	3.0516	3.00614
0.024	2.80479	2.78976	2.62698	2.75458	2.82883	2.72332	2.67259	2.6814	2.70537	2.67409	2.68576	2.53854	2.74352	2.09307	1.89772	2.75916	3.01331	2.80834	3.10085	2.95728	3.11004	3.1152	3.14696	2.97899	3.00461	3.10491	3.07949	3.03171
0.025	2.80936	2.796	2.63159	2.75767	2.83116	2.72551	2.6756	2.68798	2.7093	2.67992	2.686	2.53821	2.7432	2.09269	1.89746	2.7595	3.01367	2.80937	3.13132	2.97888	3.14035	3.14541	3.17958	3.00093	3.03053	3.13618	3.10764	3.05755
0.026	2.81407	2.80244	2.63636	2.76088	2.83358	2.72779	2.67873	2.69476	2.71338	2.68593	2.68625	2.53788	2.74289	2.09232	1.89721	2.75987	3.01406	2.81046	3.16199	3.00075	3.17086	3.17583	3.21238	3.02314	3.05669	3.16763	3.13601	3.08363
0.027	2.81895	2.80906	2.64128	2.7642	2.83611	2.73017	2.68197	2.70173	2.7176	2.69212	2.68654	2.53756	2.74258	2.09196	1.89696	2.76026	3.01449	2.8116	3.19283	3.02285	3.20154	3.20642	3.24533	3.04558	3.08306	3.19925	3.16456	3.10992
0.028	2.82396	2.81587	2.64634	2.76765	2.83874	2.73264	2.68533	2.70888	2.72195	2.69849	2.68684	2.53723	2.74227	2.09159	1.89673	2.76069	3.01494	2.81279	3.22382	3.04518	3.23237	3.23716	3.27842	3.06824	3.10961	3.23101	3.19328	3.13639
0.029	2.82913	2.82285	2.65155	2.7712	2.84146	2.73521	2.6888	2.71622	2.72644	2.70502	2.68718	2.53692	2.74197	2.09123	1.89651	2.76114	3.01542	2.81404	3.25494	3.06769	3.26333	3.26802	3.31161	3.0911	3.13632	3.26289	3.22215	3.16303
0.03	2.83443	2.83	2.6569	2.77487	2.84428	2.73787	2.69238	2.72373	2.73106	2.71172	2.68753	2.53661	2.74168	2.09088	1.89629	2.76163	3.01593	2.81534	3.28616	3.09039	3.2944	3.299	3.3449	3.11412	3.16317	3.29487	3.25114	3.18981
0.031	2.83987	2.83731	2.66239	2.77864	2.84719	2.74061	2.69606	2.73141	2.7358	2.71858	2.68791	2.5363	2.74139	2.09053	1.89609	2.76214	3.01648	2.8167	3.31748	3.11324	3.32556	3.33007	3.37827	3.1373	3.19016	3.32695	3.28024	3.21671
0.032	2.84544	2.84477	2.66801	2.78253	2.85019	2.74345	2.69984	2.73924	2.74067	2.72559	2.68832	2.53599	2.74111	2.09018	1.89589	2.76268	3.01705	2.8181	3.34888	3.13623	3.3568	3.36123	3.4117	3.16062	3.21725	3.3591	3.30944	3.24373
0.033	2.85115	2.85239	2.67376	2.78651	2.85329	2.74637	2.70373	2.74724	2.74565	2.73275	2.68874	2.5357	2.74083	2.08983	1.8957	2.76325	3.01765	2.81955	3.38035	3.15934	3.38812	3.39246	3.4452	3.18405	3.24444	3.39131	3.33872	3.27084
0.034	2.85697	2.86015	2.67963	2.7906	2.85647	2.74937	2.70772	2.75537	2.75076	2.74004	2.6892	2.5354	2.74056	2.0895	1.89553	2.76384	3.01828	2.82106	3.41187	3.18257	3.41949	3.42374	3.47875	3.2076	3.27171	3.42358	3.36808	3.29804
0.035	2.86292	2.86805	2.68563	2.79479	2.85974	2.75246	2.71181	2.76365	2.75598	2.74748	2.68967	2.53511	2.7403	2.08916	1.89536	2.76447	3.01893	2.82261	3.44346	3.2059	3.45092	3.45509	3.51234	3.23125	3.29906	3.4559	3.39749	3.32532
0.036	2.86898	2.87608	2.69174	2.79907	2.86309	2.75563	2.71599	2.77207	2.7613	2.75504	2.69017	2.53482	2.74004	2.08883	1.8952	2.76512	3.01962	2.82422	3.47508	3.22931	3.4824	3.48647	3.54596	3.25499	3.32647	3.48826	3.42696	3.35266
0.037	2.87516	2.88424	2.69797	2.80345	2.86653	2.75888	2.72026	2.78062	2.76674	2.76273	2.69069	2.53454	2.73978	2.0885	1.89505	2.7658	3.02033	2.82587	3.50674	3.25281	3.51391	3.5179	3.57962	3.2788	3.35394	3.52066	3.45648	3.38006
0.038	2.88145	2.89253	2.7043	2.80793	2.87005	2.76221	2.72463	2.78929	2.77228	2.77055	2.69124	2.53426	2.73953	2.08818	1.89491	2.7665	3.02108	2.82757	3.53844	3.27638	3.54545	3.54936	3.6133	3.30269	3.38147	3.55309	3.48604	3.40751
0.039	2.88784	2.90093	2.71075	2.81249	2.87365	2.76562	2.72908	2.79808	2.77792	2.77847	2.69181	2.53399	2.73929	2.08786	1.89477	2.76724	3.02185	2.82932	3.57016	3.30001	3.57703	3.58084	3.647	3.32663	3.40903	3.58554	3.51563	3.435
0.04	2.89434	2.90944	2.71729	2.81714	2.87732	2.7691	2.73362	2.80698	2.78366	2.78651	2.6924	2.53372	2.73905	2.08755	1.89465	2.768	3.02264	2.83111	3.60191	3.32371	3.60863	3.61236	3.68072	3.35063	3.43664	3.61801	3.54526	3.46253
0.041	2.90093	2.91806	2.72394	2.82188	2.88108	2.77266	2.73825	2.816	2.7895	2.79466	2.69301	2.53346	2.73881	2.08723	1.89454	2.76878	3.02347	2.83295	3.63367	3.34745	3.64024	3.64389	3.71446	3.37469	3.46427	3.6505	3.57491	3.4901
0.042	2.90762	2.92679	2.73068	2.8267	2.88491	2.77629	2.74295	2.82512	2.79542	2.80291	2.69365	2.5332	2.73859	2.08693	1.89443	2.7696	3.02432	2.83484	3.66546	3.37123	3.67188	3.67544	3.74821	3.39878	3.49194	3.68301	3.60458	3.51769
0.043	2.91441	2.93561	2.73751	2.8316	2.88881	2.77999	2.74774	2.83433	2.80144	2.81126	2.69431	2.53294	2.73836	2.08662	1.89433	2.77044	3.0252	2.83677	3.69726	3.39506	3.70353	3.707	3.78197	3.42291	3.51963	3.71553	3.63427	3.54531
0.044	2.92128	2.94453	2.74443	2.83658	2.89278	2.78376	2.7526	2.84365	2.80754	2.8197	2.69499	2.53269	2.73814	2.08632	1.89424	2.7713	3.02611	2.83875	3.72907	3.41892	3.73519	3.73858	3.81574	3.44708	3.54735	3.74806	3.66398	3.57296
0.045	2.92824	2.95354	2.75144	2.84164	2.89683	2.7876	2.75755	2.85305	2.81373	2.82824	2.6957	2.53244	2.73793	2.08603	1.89417	2.77219	3.02704	2.84077	3.76089	3.44282	3.76687	3.77017	3.84951	3.47128	3.57508	3.7806	3.69371	3.60062
0.046	2.93529	2.96263	2.75854	2.84678	2.90094	2.79151	2.76256	2.86254	2.82	2.83686	2.69642	2.5322	2.73773	2.08574	1.89409	2.77311	3.028	2.84283	3.79272	3.46674	3.79855	3.80177	3.8833	3.49551	3.60284	3.81314	3.72345	3.6283
0.047	2.94241	2.97181	2.76571	2.85198	2.90512	2.79548	2.76765	2.87211	2.82635	2.84556	2.69717	2.53196	2.73752	2.08545	1.89403	2.77405	3.02898	2.84494	3.82455	3.49069	3.83024	3.83337	3.91708	3.51976	3.6306	3.8457	3.75319	3.656
0.048	2.94961	2.98107	2.77296	2.85726	2.90937	2.79951	2.77281	2.88176	2.83277	2.85434	2.69794	2.53172	2.73733	2.08517	1.89398	2.77502	3.03	2.84708	3.8564	3.51467	3.86193	3.86498	3.95087	3.54403	3.65838	3.87825	3.78295	3.68371
0.049	2.95689	2.9904	2.78028	2.86261	2.91368	2.80361	2.77803	2.89149	2.83927	2.8632	2.69873	2.53149	2.73714	2.08489	1.89394	2.77601	3.03103	2.84927	3.88824	3.53866	3.89363	3.8966	3.98466	3.56833	3.68617	3.91082	3.81271	3.71143
0.05	2.96424	2.9998	2.78768	2.86802	2.91805	2.80776	2.78332	2.90128	2.84584	2.87213	2.69954	2.53126	2.73695	2.08461	1.8939	2.77703	3.03209	2.85151	3.92009	3.56267	3.92533	3.92822	4.01845	3.59263	3.71397	3.94338	3.84248	3.73916
0.051	2.97166	3.00927	2.79515	2.8735	2.92248	2.81198	2.78868	2.91115	2.85247	2.88114	2.70038	2.53104	2.73677	2.08434	1.89387	2.77807	3.03318	2.85378	3.95195	3.58669	3.95704	3.95984	4.05224	3.61696	3.74178	3.97595	3.87226	3.76689
0.052	2.97914	3.01881	2.80268	2.87904	2.92698	2.81625	2.7941	2.92107	2.85917	2.8902	2.70123	2.53082	2.73659	2.08407	1.89385	2.77914	3.03429	2.85609	3.9838	3.61073	3.98875	3.99146	4.08604	3.64129	3.76959	4.00851	3.90204	3.79464
0.053	2.98669	3.02841	2.81028	2.88465	2.93153	2.82059	2.79958	2.93106	2.86594	2.89933	2.70211	2.5306	2.73642	2.08381	1.89384	2.78023	3.03543	2.85844	4.01566	3.63478	4.02046	4.02308	4.11983	3.66564	3.79741	4.04108	3.93182	3.82239
0.054	2.9943	3.03807	2.81793	2.89031	2.93613	2.82497	2.80512	2.94111	2.87277	2.90852	2.703	2.53039	2.73626	2.08355	1.89384	2.78134	3.03659	2.86083	4.04751	3.65884	4.05216	4.05471	4.15362	3.69	3.82524	4.07365	3.9616	3.85014
0.055	3.00197	3.04778	2.82565	2.89603	2.94079	2.82941	2.81071	2.95122	2.87966	2.91777	2.70392	2.53019	2.7361	2.08329	1.89385	2.78248	3.03778	2.86326	4.07937	3.68291	4.08387	4.08633	4.18741	3.71437	3.85307	4.10621	3.99139	3.8779
0.056	3.00969	3.05755	2.83343	2.90181	2.94551	2.8339	2.81636	2.96137	2.88661	2.92707	2.70486	2.52998	2.73594	2.08304	1.89386	2.78364	3.03899	2.86572	4.11122	3.70699	4.11558	4.11796	4.22119	3.73874	3.8809	4.13878	4.02117	3.90566
0.057	3.01748	3.06737	2.84125	2.90764	2.95028	2.83845	2.82207	2.97158	2.89361	2.93643	2.70581	2.52978	2.73579	2.08279	1.89389	2.78483	3.04022	2.86823	4.14307	3.73108	4.14729	4.14958	4.25497	3.76312	3.90873	4.17134	4.05096	3.93342
0.058	3.02531	3.07724	2.84914	2.91353	2.9551	2.84304	2.82783	2.98183	2.90066	2.94583	2.70679	2.52959	2.73564	2.08254	1.89392	2.78603	3.04148	2.87077	4.17492	3.75517	4.17899	4.1812	4.28875	3.78751	3.93657	4.2039	4.08075	3.96119
0.059	3.03319	3.08715	2.85707	2.91946	2.95996	2.84769	2.83364	2.99213	2.90777	2.95529	2.70779	2.5294	2.7355	2.0823	1.89396	2.78726	3.04276	2.87334	4.20677	3.77927	4.21069	4.21282	4.32252	3.8119	3.96441	4.23645	4.11053	3.98895
0.06	3.04113	3.09711	2.86505	2.92545	2.96488	2.85238	2.83949	3.00248	2.91492	2.96479	2.7088	2.52921	2.73537	2.08206	1.89401	2.78852	3.04406	2.87595	4.23862	3.80337	4.24239	4.24443	4.35629	3.8363	3.99224	4.26901	4.14032	4.01672
0.061	3.04911	3.10711	2.87308	2.93148	2.96984	2.85711	2.8454	3.01286	2.92213	2.97433	2.70984	2.52903	2.73524	2.08183	1.89407	2.78979	3.04539	2.87859	4.27046	3.82748	4.27409	4.27604	4.39005	3.8607	4.02008	4.30156	4.1701	4.04449
0.062	3.05713	3.11715	2.88115	2.93756	2.97485	2.86189	2.85135	3.02328	2.92938	2.98391	2.71089	2.52885	2.73511	2.0816	1.89413	2.79109	3.04674	2.88127	4.3023	3.85159	4.30578	4.30765	4.42381	3.8851	4.04792	4.3341	4.19988	4.07226
0.063	3.0652	3.12723	2.88926	2.94369	2.97991	2.86672	2.85735	3.03374	2.93667	2.99354	2.71197	2.52868	2.73499	2.08137	1.89421	2.79241	3.04811	2.88399	4.33413	3.8757	4.33747	4.33925	4.45756	3.9095	4.07576	4.36664	4.22966	4.10002
0.064	3.07331	3.13734	2.89742	2.94985	2.985	2.87159	2.86339	3.04423	2.94401	3.0032	2.71306	2.5285	2.73488	2.08115	1.89429	2.79375	3.0495	2.88673	4.36596	3.89982	4.36915	4.37085	4.4913	3.93391	4.10359	4.39917	4.25943	4.12779
0.065	3.08145	3.14749	2.90561	2.95606	2.99014	2.8765	2.86947	3.05476	2.95139	3.01289	2.71417	2.52834	2.73477	2.08093	1.89438	2.79511	3.05092	2.88951	4.39778	3.92393	4.40082	4.40245	4.52503	3.95832	4.13143	4.4317	4.2892	4.15555
0.066	3.08964	3.15767	2.91384	2.96231	2.99532	2.88145	2.87559	3.06532	2.95881	3.02262	2.7153	2.52817	2.73466	2.08072	1.89447	2.7965	3.05236	2.89232	4.4296	3.94805	4.43249	4.43403	4.55876	3.98273	4.15926	4.46422	4.31897	4.18331
0.067	3.09786	3.16789	2.92211	2.9686	3.00054	2.88644	2.88175	3.07591	2.96626	3.03239	2.71645	2.52802	2.73456	2.08051	1.89458	2.7979	3.05381	2.89516	4.46141	3.97217	4.46416	4.46561	4.59247	4.00713	4.18709	4.49673	4.34873	4.21107
0.068	3.10612	3.17813	2.93042	2.97493	3.0058	2.89147	2.88795	3.08652	2.97376	3.04218	2.71762	2.52786	2.73447	2.0803	1.89469	2.79933	3.0553	2.89803	4.49321	3.99629	4.49581	4.49718	4.62618	4.03154	4.21492	4.52924	4.37849	4.23883
0.069	3.11441	3.1884	2.93875	2.9813	3.01109	2.89653	2.89419	3.09717	2.98129	3.052	2.71881	2.52771	2.73438	2.08009	1.89481	2.80078	3.0568	2.90094	4.52501	4.02041	4.52746	4.52875	4.65987	4.05595	4.24275	4.56173	4.40824	4.26658
0.07	3.12273	3.19869	2.94712	2.9877	3.01642	2.90163	2.90046	3.10783	2.98885	3.06185	2.72001	2.52756	2.73429	2.07989	1.89494	2.80224	3.05832	2.90387	4.5568	4.04453	4.5591	4.56031	4.69355	4.08036	4.27057	4.59422	4.43798	4.29433
0.071	3.13109	3.20901	2.95552	2.99413	3.02179	2.90677	2.90677	3.11853	2.99644	3.07173	2.72123	2.52742	2.73421	2.0797	1.89508	2.80373	3.05986	2.90683	4.58857	4.06865	4.59073	4.59185	4.72722	4.10477	4.29839	4.6267	4.46772	4.32208
0.072	3.13947	3.21936	2.96395	3.0006	3.02719	2.91194	2.91311	3.12924	3.00407	3.08163	2.72247	2.52728	2.73413	2.0795	1.89523	2.80524	3.06142	2.90982	4.62034	4.09276	4.62236	4.62339	4.76087	4.12917	4.32621	4.65916	4.49746	4.34982
0.073	3.14788	3.22972	2.97241	3.0071	3.03263	2.91715	2.91948	3.13998	3.01173	3.09156	2.72373	2.52714	2.73406	2.07931	1.89538	2.80676	3.06301	2.91284	4.6521	4.11688	4.65397	4.65492	4.7945	4.15358	4.35402	4.69161	4.52718	4.37756
0.074	3.15632	3.24011	2.98089	3.01364	3.03809	2.92238	2.92589	3.15074	3.01941	3.10151	2.725	2.52701	2.73399	2.07913	1.89554	2.80831	3.06461	2.91589	4.68384	4.14099	4.68556	4.68643	4.82812	4.17798	4.38182	4.72405	4.5569	4.40529
0.075	3.16478	3.25052	2.9894	3.0202	3.04359	2.92765	2.93232	3.16151	3.02713	3.11148	2.72629	2.52688	2.73393	2.07895	1.89571	2.80987	3.06623	2.91896	4.71558	4.16511	4.71715	4.71794	4.86172	4.20238	4.40963	4.75648	4.58661	4.43302
0.076	3.17327	3.26095	2.99794	3.02679	3.04912	2.93295	2.93879	3.17231	3.03487	3.12147	2.7276	2.52676	2.73388	2.07877	1.89588	2.81146	3.06788	2.92206	4.7473	4.18922	4.74872	4.74943	4.8953	4.22678	4.43742	4.78889	4.61631	4.46075
0.077	3.18179	3.2714	3.0065	3.03341	3.05468	2.93828	2.94528	3.18312	3.04263	3.13148	2.72892	2.52664	2.73382	2.07859	1.89607	2.81306	3.06954	2.92519	4.779	4.21332	4.78028	4.7809	4.92886	4.25117	4.46521	4.82128	4.646	4.48846
0.078	3.19032	3.28186	3.01508	3.04006	3.06027	2.94364	2.9518	3.19395	3.05042	3.14151	2.73026	2.52652	2.73378	2.07842	1.89626	2.81468	3.07122	2.92834	4.81069	4.23743	4.81182	4.81236	4.9624	4.27556	4.493	4.85366	4.67568	4.51617
0.079	3.19888	3.29234	3.02368	3.04673	3.06588	2.94902	2.95835	3.20479	3.05824	3.15156	2.73162	2.52641	2.73373	2.07825	1.89646	2.81632	3.07292	2.93152	4.84237	4.26153	4.84335	4.84381	4.99591	4.29995	4.52077	4.88602	4.70535	4.54387
0.08	3.20746	3.30284	3.0323	3.05343	3.07152	2.95444	2.96492	3.21565	3.06607	3.16163	2.733	2.5263	2.73369	2.07809	1.89666	2.81798	3.07463	2.93472	4.87402	4.28563	4.87486	4.87523	5.02939	4.32434	4.54855	4.91836	4.735	4.57157
0.081	3.21606	3.31335	3.04095	3.06015	3.07719	2.95988	2.97151	3.22652	3.07393	3.17171	2.73439	2.52619	2.73366	2.07793	1.89688	2.81966	3.07637	2.93795	4.90566	4.30973	4.90635	4.90664	5.06285	4.34872	4.57631	4.95067	4.76464	4.59926
0.082	3.22467	3.32388	3.04961	3.0669	3.08289	2.96534	2.97813	3.23741	3.08181	3.1818	2.73579	2.52609	2.73363	2.07777	1.8971	2.82135	3.07812	2.9412	4.93727	4.33382	4.93782	4.93802	5.09627	4.37309	4.60406	4.98296	4.79427	4.62694
0.083	3.23331	3.33442	3.05829	3.07367	3.0886	2.97083	2.98477	3.24831	3.08971	3.19192	2.73721	2.52599	2.73361	2.07761	1.89733	2.82307	3.0799	2.94448	4.96887	4.35791	4.96926	4.96939	5.12966	4.39747	4.63181	5.01523	4.82388	4.65461
0.084	3.24196	3.34497	3.06699	3.08046	3.09435	2.97635	2.99144	3.25922	3.09763	3.20204	2.73865	2.52589	2.73359	2.07746	1.89757	2.8248	3.08169	2.94778	5.00044	4.382	5.00068	5.00073	5.16301	4.42183	4.65954	5.04747	4.85348	4.68226
0.085	3.25063	3.35553	3.0757	3.08727	3.10011	2.98189	2.99813	3.27014	3.10557	3.21218	2.7401	2.5258	2.73357	2.07732	1.89781	2.82654	3.08349	2.9511	5.03198	4.40608	5.03208	5.03204	5.19632	4.4462	4.68727	5.07967	4.88306	4.70991
0.086	3.25932	3.36611	3.08443	3.0941	3.1059	2.98745	3.00483	3.28107	3.11353	3.22233	2.74157	2.52572	2.73356	2.07717	1.89806	2.82831	3.08532	2.95444	5.06349	4.43015	5.06345	5.06333	5.22959	4.47055	4.71499	5.11185	4.91262	4.73755
0.087	3.26802	3.37669	3.09318	3.10095	3.11171	2.99303	3.01156	3.29202	3.1215	3.23249	2.74305	2.52563	2.73356	2.07703	1.89832	2.83009	3.08716	2.9578	5.09498	4.45422	5.09479	5.09458	5.26281	4.4949	4.74269	5.14399	4.94216	4.76518
0.088	3.27673	3.38729	3.10194	3.10782	3.11754	2.99863	3.01831	3.30297	3.12949	3.24266	2.74455	2.52555	2.73355	2.0769	1.89858	2.83188	3.08902	2.96119	5.12643	4.47829	5.12609	5.12581	5.29599	4.51925	4.77038	5.1761	4.97168	4.79279
0.089	3.28546	3.3979	3.11071	3.11471	3.12339	3.00426	3.02507	3.31393	3.1375	3.25285	2.74606	2.52548	2.73356	2.07676	1.89886	2.8337	3.09089	2.9646	5.15785	4.50235	5.15737	5.157	5.32911	4.54359	4.79806	5.20817	5.00118	4.82039
0.09	3.2942	3.40851	3.1195	3.12162	3.12926	3.0099	3.03185	3.3249	3.14552	3.26304	2.74759	2.5254	2.73356	2.07663	1.89913	2.83553	3.09278	2.96802	5.18924	4.5264	5.1886	5.18816	5.36217	4.56792	4.82573	5.24019	5.03065	4.84798
0.091	3.30296	3.41913	3.1283	3.12855	3.13516	3.01557	3.03865	3.33587	3.15355	3.27324	2.74913	2.52533	2.73358	2.07651	1.89942	2.83737	3.09469	2.97147	5.22058	4.55044	5.2198	5.21927	5.39517	4.59224	4.85338	5.27217	5.0601	4.87554
0.092	3.31173	3.42977	3.13711	3.13549	3.14106	3.02125	3.04547	3.34686	3.1616	3.28345	2.75069	2.52527	2.73359	2.07638	1.89972	2.83923	3.09661	2.97494	5.25188	4.57448	5.25095	5.25035	5.4281	4.61656	4.88101	5.3041	5.08952	4.9031
0.093	3.32051	3.44041	3.14594	3.14244	3.14699	3.02696	3.0523	3.35785	3.16967	3.29368	2.75226	2.52521	2.73361	2.07626	1.90002	2.84111	3.09855	2.97842	5.28314	4.59851	5.28206	5.28137	5.46096	4.64086	4.90863	5.33597	5.1189	4.93063
0.094	3.3293	3.45105	3.15477	3.14941	3.15294	3.03268	3.05915	3.36885	3.17774	3.3039	2.75384	2.52515	2.73364	2.07615	1.90032	2.843	3.10051	2.98193	5.31434	4.62254	5.31312	5.31236	5.49375	4.66516	4.93623	5.36779	5.14826	4.95815
0.095	3.3381	3.46171	3.16362	3.1564	3.1589	3.03841	3.06602	3.37986	3.18583	3.31414	2.75544	2.52509	2.73367	2.07603	1.90064	2.84491	3.10248	2.98545	5.3455	4.64655	5.34413	5.34329	5.52645	4.68945	4.96381	5.39955	5.17759	4.98565
0.096	3.34691	3.47237	3.17247	3.1634	3.16488	3.04417	3.07289	3.39087	3.19393	3.32438	2.75705	2.52504	2.7337	2.07592	1.90096	2.84683	3.10446	2.989	5.3766	4.67056	5.37508	5.37416	5.55906	4.71373	4.99138	5.43125	5.20687	5.01312
0.097	3.35573	3.48303	3.18134	3.17042	3.17087	3.04994	3.07979	3.40188	3.20204	3.33464	2.75868	2.52499	2.73374	2.07582	1.90129	2.84877	3.10646	2.99256	5.40764	4.69456	5.40598	5.40497	5.59158	4.738	5.01892	5.46287	5.23612	5.04058
0.098	3.36456	3.49371	3.19021	3.17744	3.17688	3.05572	3.08669	3.41291	3.21016	3.34489	2.76032	2.52495	2.73378	2.07571	1.90162	2.85072	3.10848	2.99613	5.43861	4.71855	5.4368	5.43573	5.62399	4.76225	5.04643	5.49442	5.26533	5.06801
0.099	3.3734	3.50439	3.1991	3.18448	3.1829	3.06153	3.09361	3.42393	3.21829	3.35516	2.76197	2.52491	2.73383	2.07561	1.90197	2.85268	3.11051	2.99973	5.46952	4.74252	5.46756	5.46641	5.65629	4.7865	5.07393	5.52589	5.29449	5.09541
0.1	3.38225	3.51507	3.20799	3.19154	3.18894	3.06734	3.10054	3.43496	3.22643	3.36543	2.76363	2.52487	2.73388	2.07552	1.90232	2.85466	3.11255	3.00334	5.50035	4.76649	5.49825	5.49702	5.68848	4.81073	5.10139	5.55727	5.32361	5.12279
0.101	3.39111	3.52576	3.21689	3.1986	3.19499	3.07317	3.10748	3.446	3.23459	3.3757	2.76531	2.52484	2.73394	2.07542	1.90267	2.85666	3.11461	3.00697	5.5311	4.79044	5.52886	5.52755	5.72054	4.83495	5.12883	5.58857	5.35267	5.15014
0.102	3.39997	3.53645	3.2258	3.20568	3.20106	3.07902	3.11444	3.45704	3.24275	3.38598	2.767	2.5248	2.734	2.07533	1.90303	2.85867	3.11668	3.01061	5.56177	4.81439	5.55938	5.558	5.75246	4.85915	5.15624	5.61976	5.38169	5.17745
0.103	3.40884	3.54715	3.23471	3.21276	3.20714	3.08488	3.12141	3.46809	3.25092	3.39627	2.76871	2.52478	2.73406	2.07525	1.9034	2.86069	3.11876	3.01427	5.59235	4.83831	5.58982	5.58837	5.78424	4.88335	5.18362	5.65085	5.41064	5.20474
0.104	3.41772	3.55785	3.24363	3.21986	3.21323	3.09075	3.12838	3.47913	3.25909	3.40656	2.77042	2.52475	2.73413	2.07516	1.90378	2.86272	3.12086	3.01794	5.62283	4.86223	5.62016	5.61863	5.81587	4.90752	5.21097	5.68182	5.43954	5.23199
0.105	3.4266	3.56855	3.25256	3.22697	3.21933	3.09663	3.13537	3.49019	3.26728	3.41686	2.77215	2.52473	2.7342	2.07508	1.90416	2.86477	3.12298	3.02163	5.65321	4.88613	5.6504	5.6488	5.84733	4.93168	5.23828	5.71268	5.46837	5.2592
0.106	3.43549	3.57926	3.2615	3.23409	3.22545	3.10253	3.14237	3.50124	3.27547	3.42715	2.77389	2.52472	2.73428	2.07501	1.90455	2.86683	3.1251	3.02534	5.68348	4.91002	5.68053	5.67886	5.87861	4.95582	5.26555	5.7434	5.49713	5.28638
0.107	3.44439	3.58998	3.27044	3.24121	3.23157	3.10844	3.14937	3.5123	3.28367	3.43746	2.77564	2.5247	2.73436	2.07493	1.90494	2.86891	3.12724	3.02906	5.71364	4.93389	5.71054	5.7088	5.90971	4.97994	5.29278	5.77399	5.52581	5.31351
0.108	3.45329	3.60069	3.27939	3.24835	3.23771	3.11436	3.15639	3.52336	3.29188	3.44777	2.7774	2.52469	2.73444	2.07486	1.90535	2.87099	3.12939	3.03279	5.74367	4.95774	5.74043	5.73862	5.9406	5.00404	5.31997	5.80443	5.55442	5.3406
0.109	3.4622	3.61141	3.28834	3.2555	3.24386	3.12029	3.16342	3.53443	3.3001	3.45808	2.77918	2.52469	2.73453	2.0748	1.90575	2.87309	3.13156	3.03654	5.77356	4.98157	5.77018	5.76831	5.97129	5.02813	5.34712	5.83472	5.58295	5.36764
0.11	3.47112	3.62213	3.2973	3.26265	3.25002	3.12623	3.17045	3.54549	3.30832	3.46839	2.78097	2.52468	2.73463	2.07473	1.90617	2.8752	3.13373	3.0403	5.80332	5.00539	5.7998	5.79787	6.00174	5.05219	5.37422	5.86484	5.61138	5.39463
0.111	3.48004	3.63286	3.30626	3.26981	3.25619	3.13218	3.17749	3.55656	3.31655	3.47871	2.78277	2.52468	2.73472	2.07467	1.90659	2.87733	3.13592	3.04407	5.83292	5.02918	5.82927	5.82727	6.03196	5.07622	5.40127	5.89479	5.63973	5.42157
0.112	3.48896	3.64359	3.31523	3.27698	3.26237	3.13814	3.18454	3.56763	3.32478	3.48903	2.78458	2.52469	2.73482	2.07461	1.90702	2.87947	3.13813	3.04786	5.86237	5.05296	5.85858	5.85652	6.06192	5.10024	5.42826	5.92455	5.66797	5.44845
0.113	3.49789	3.65432	3.3242	3.28416	3.26856	3.14412	3.1916	3.57871	3.33302	3.49935	2.7864	2.52469	2.73493	2.07456	1.90745	2.88161	3.14034	3.05165	5.89164	5.07671	5.88772	5.8856	6.09162	5.12423	5.4552	5.95411	5.69611	5.47528
0.114	3.50682	3.66505	3.33318	3.29134	3.27475	3.1501	3.19867	3.58978	3.34126	3.50968	2.78823	2.5247	2.73504	2.07451	1.90789	2.88377	3.14256	3.05547	5.92074	5.10044	5.91669	5.91451	6.12103	5.14819	5.48207	5.98346	5.72413	5.50204
0.115	3.51576	3.67578	3.34216	3.29853	3.28096	3.15609	3.20574	3.60086	3.34951	3.52001	2.79007	2.52471	2.73515	2.07446	1.90833	2.88595	3.1448	3.05929	5.94964	5.12414	5.94546	5.94323	6.15014	5.17212	5.50888	6.01259	5.75204	5.52873
0.116	3.5247	3.68652	3.35115	3.30573	3.28717	3.16209	3.21282	3.61194	3.35777	3.53034	2.79193	2.52473	2.73527	2.07441	1.90879	2.88813	3.14705	3.06313	5.97835	5.14782	5.97404	5.97175	6.17894	5.19602	5.53563	6.04149	5.77982	5.55535
0.117	3.53364	3.69725	3.36013	3.31293	3.29339	3.1681	3.21991	3.62302	3.36603	3.54067	2.79379	2.52475	2.73539	2.07437	1.90924	2.89032	3.14931	3.06697	6.00684	5.17147	6.0024	6.00006	6.20741	5.21989	5.5623	6.07013	5.80746	5.5819
0.118	3.54259	3.70799	3.36913	3.32014	3.29962	3.17411	3.227	3.6341	3.37429	3.55101	2.79566	2.52477	2.73552	2.07433	1.90971	2.89253	3.15158	3.07083	6.0351	5.19509	6.03054	6.02816	6.23553	5.24373	5.5889	6.09851	5.83496	5.60837
0.119	3.55154	3.71874	3.37812	3.32736	3.30586	3.18014	3.2341	3.64518	3.38256	3.56134	2.79755	2.5248	2.73565	2.0743	1.91018	2.89475	3.15386	3.0747	6.06313	5.21868	6.05845	6.05602	6.26328	5.26753	5.61541	6.12662	5.86232	5.63475
0.12	3.5605	3.72948	3.38712	3.33458	3.31211	3.18617	3.24121	3.65627	3.39083	3.57168	2.79945	2.52483	2.73578	2.07426	1.91065	2.89697	3.15616	3.07858	6.09091	5.24224	6.08611	6.08363	6.29066	5.2913	5.64184	6.15444	5.88951	5.66105
0.121	3.56946	3.74022	3.39613	3.34181	3.31836	3.19221	3.24832	3.66735	3.39911	3.58202	2.80135	2.52486	2.73592	2.07423	1.91113	2.89921	3.15846	3.08247	6.11842	5.26576	6.11351	6.11099	6.31764	5.31502	5.66818	6.18195	5.91654	5.68725
0.122	3.57842	3.75097	3.40513	3.34904	3.32462	3.19826	3.25543	3.67844	3.40739	3.59237	2.80327	2.52489	2.73606	2.07421	1.91162	2.90146	3.16077	3.08638	6.14566	5.28925	6.14063	6.13808	6.3442	5.33871	5.69442	6.20915	5.94339	5.71335
0.123	3.58738	3.76171	3.41414	3.35628	3.33089	3.20431	3.26256	3.68953	3.41568	3.60271	2.80519	2.52493	2.73621	2.07418	1.91212	2.90372	3.1631	3.09029	6.17261	5.3127	6.16747	6.16489	6.37035	5.36235	5.72056	6.23601	5.97006	5.73935
0.124	3.59635	3.77246	3.42315	3.36352	3.33716	3.21037	3.26968	3.70062	3.42396	3.61306	2.80713	2.52498	2.73635	2.07416	1.91262	2.90599	3.16543	3.09421	6.19926	5.33611	6.19401	6.1914	6.39604	5.38594	5.7466	6.26253	5.99653	5.76523
0.125	3.60532	3.78321	3.43216	3.37077	3.34344	3.21644	3.27682	3.71171	3.43225	3.6234	2.80907	2.52502	2.73651	2.07414	1.91312	2.90827	3.16778	3.09814	6.22559	5.35948	6.22024	6.2176	6.42129	5.40949	5.77252	6.28868	6.02279	5.791
0.126	3.61429	3.79396	3.44118	3.37802	3.34972	3.22251	3.28395	3.7228	3.44055	3.63375	2.81103	2.52507	2.73666	2.07413	1.91363	2.91055	3.17013	3.10208	6.25159	5.3828	6.24614	6.24347	6.44606	5.43299	5.79832	6.31446	6.04884	5.81665
0.127	3.62326	3.80471	3.4502	3.38528	3.35601	3.22859	3.29109	3.73389	3.44885	3.6441	2.81299	2.52512	2.73682	2.07412	1.91415	2.91285	3.1725	3.10603	6.27725	5.40608	6.2717	6.26902	6.47035	5.45643	5.824	6.33984	6.07466	5.84217
0.128	3.63224	3.81546	3.45922	3.39254	3.36231	3.23468	3.29824	3.74498	3.45715	3.65445	2.81496	2.52517	2.73699	2.07411	1.91467	2.91516	3.17487	3.10999	6.30254	5.42931	6.29691	6.29421	6.49414	5.47982	5.84955	6.36482	6.10025	5.86755
0.129	3.64122	3.82621	3.46824	3.3998	3.36861	3.24077	3.30539	3.75607	3.46545	3.6648	2.81694	2.52523	2.73716	2.0741	1.9152	2.91748	3.17725	3.11396	6.32747	5.45248	6.32175	6.31903	6.51743	5.50315	5.87496	6.38939	6.12559	5.89279
0.13	3.6502	3.83696	3.47727	3.40707	3.37491	3.24687	3.31254	3.76716	3.47375	3.67516	2.81893	2.52529	2.73733	2.0741	1.91573	2.91981	3.17965	3.11794	6.35202	5.47561	6.34621	6.34349	6.54021	5.52641	5.90022	6.41352	6.15067	5.91787
0.131	3.65918	3.84771	3.48629	3.41434	3.38123	3.25297	3.3197	3.77826	3.48206	3.68551	2.82093	2.52535	2.7375	2.0741	1.91627	2.92214	3.18205	3.12193	6.37616	5.49867	6.37028	6.36755	6.56247	5.54962	5.92532	6.43722	6.17547	5.9428
0.132	3.66816	3.85847	3.49532	3.42162	3.38754	3.25908	3.32686	3.78935	3.49037	3.69586	2.82294	2.52542	2.73768	2.0741	1.91682	2.92449	3.18446	3.12592	6.39991	5.52168	6.39395	6.39122	6.58419	5.57275	5.95027	6.46046	6.2	5.96756
0.133	3.67714	3.86922	3.50435	3.4289	3.39386	3.2652	3.33403	3.80044	3.49869	3.70622	2.82496	2.52549	2.73787	2.0741	1.91737	2.92684	3.18688	3.12992	6.42323	5.54462	6.4172	6.41448	6.60539	5.59581	5.97505	6.48323	6.22424	5.99215
0.134	3.68613	3.87997	3.51338	3.43618	3.40019	3.27131	3.3412	3.81154	3.507	3.71657	2.82698	2.52556	2.73805	2.07411	1.91792	2.9292	3.18931	3.13393	6.44612	5.5675	6.44003	6.43731	6.62605	5.61879	5.99965	6.50554	6.24817	6.01655
0.135	3.69512	3.89073	3.52242	3.44346	3.40652	3.27744	3.34837	3.82263	3.51532	3.72693	2.82902	2.52564	2.73824	2.07412	1.91848	2.93158	3.19174	3.13795	6.46857	5.59031	6.46243	6.45972	6.64617	5.6417	6.02406	6.52737	6.27179	6.04077
0.136	3.70411	3.90148	3.53145	3.45075	3.41285	3.28357	3.35555	3.83372	3.52364	3.73728	2.83106	2.52572	2.73844	2.07414	1.91905	2.93396	3.19419	3.14198	6.49058	5.61305	6.48438	6.48168	6.66576	5.66452	6.04828	6.54871	6.29508	6.06478
0.137	3.7131	3.91224	3.54049	3.45804	3.41919	3.2897	3.36272	3.84482	3.53196	3.74764	2.83311	2.5258	2.73863	2.07416	1.91962	2.93634	3.19664	3.14601	6.51213	5.63571	6.50588	6.5032	6.68482	5.68726	6.0723	6.56956	6.31804	6.08859
0.138	3.72209	3.92299	3.54952	3.46534	3.42554	3.29583	3.36991	3.85591	3.54028	3.758	2.83517	2.52588	2.73884	2.07418	1.9202	2.93874	3.19911	3.15005	6.53321	5.65829	6.52692	6.52426	6.70334	5.7099	6.09611	6.58991	6.34065	6.11218
0.139	3.73108	3.93374	3.55856	3.47264	3.43188	3.30197	3.37709	3.867	3.5486	3.76836	2.83724	2.52597	2.73904	2.0742	1.92078	2.94115	3.20158	3.1541	6.55383	5.68079	6.5475	6.54487	6.72134	5.73245	6.11969	6.60977	6.36291	6.13554
0.14	3.74007	3.9445	3.5676	3.47994	3.43823	3.30812	3.38428	3.8781	3.55693	3.77871	2.83931	2.52606	2.73925	2.07422	1.92137	2.94356	3.20406	3.15815	6.57398	5.7032	6.56761	6.56501	6.73882	5.7549	6.14305	6.62913	6.3848	6.15867
0.141	3.74907	3.95525	3.57664	3.48724	3.44458	3.31427	3.39147	3.88919	3.56526	3.78907	2.84139	2.52615	2.73946	2.07425	1.92196	2.94598	3.20654	3.16221	6.59365	5.72551	6.58725	6.58468	6.7558	5.77725	6.16616	6.64799	6.40632	6.18156
0.142	3.75806	3.966	3.58568	3.49454	3.45094	3.32042	3.39866	3.90028	3.57359	3.79943	2.84348	2.52625	2.73968	2.07428	1.92256	2.94841	3.20904	3.16628	6.61284	5.74774	6.60642	6.60388	6.77227	5.79948	6.18903	6.66636	6.42745	6.20419
0.143	3.76706	3.97676	3.59473	3.50185	3.4573	3.32658	3.40585	3.91138	3.58192	3.80979	2.84558	2.52635	2.73989	2.07432	1.92316	2.95084	3.21154	3.17036	6.63156	5.76986	6.62512	6.62261	6.78825	5.8216	6.21165	6.68423	6.4482	6.22656
0.144	3.77605	3.98751	3.60377	3.50916	3.46366	3.33274	3.41305	3.92247	3.59025	3.82015	2.84768	2.52645	2.74012	2.07435	1.92377	2.95329	3.21405	3.17444	6.6498	5.79187	6.64334	6.64088	6.80375	5.8436	6.23399	6.70161	6.46855	6.24865
0.145	3.78505	3.99826	3.61281	3.51647	3.47003	3.3389	3.42025	3.93356	3.59858	3.8305	2.84979	2.52656	2.74034	2.07439	1.92438	2.95574	3.21656	3.17852	6.66757	5.81378	6.6611	6.65867	6.81879	5.86548	6.25606	6.71851	6.4885	6.27047
0.146	3.79405	4.00902	3.62186	3.52378	3.4764	3.34506	3.42745	3.94465	3.60691	3.84086	2.85191	2.52666	2.74057	2.07443	1.925	2.9582	3.21909	3.18262	6.68487	5.83557	6.67839	6.676	6.83338	5.88723	6.27785	6.73494	6.50804	6.292
0.147	3.80305	4.01977	3.6309	3.5311	3.48277	3.35123	3.43466	3.95574	3.61525	3.85122	2.85404	2.52678	2.7408	2.07448	1.92563	2.96066	3.22162	3.18672	6.7017	5.85725	6.69521	6.69287	6.84752	5.90884	6.29934	6.7509	6.52717	6.31324
0.148	3.81205	4.03052	3.63995	3.53841	3.48915	3.3574	3.44186	3.96684	3.62358	3.86158	2.85617	2.52689	2.74104	2.07453	1.92626	2.96314	3.22416	3.19082	6.71807	5.8788	6.71158	6.70928	6.86124	5.93031	6.32054	6.7664	6.54588	6.33416
0.149	3.82105	4.04127	3.64899	3.54573	3.49552	3.36358	3.44907	3.97793	3.63192	3.87194	2.85831	2.52701	2.74128	2.07458	1.92689	2.96562	3.2267	3.19493	6.73399	5.90022	6.7275	6.72525	6.87456	5.95163	6.34142	6.78146	6.56418	6.35478
0.15	3.83005	4.05202	3.65804	3.55305	3.5019	3.36976	3.45628	3.98902	3.64026	3.8823	2.86046	2.52712	2.74152	2.07463	1.92753	2.9681	3.22925	3.19905	6.74946	5.9215	6.74298	6.74077	6.88747	5.9728	6.36199	6.79607	6.58207	6.37507
0.151	3.83905	4.06277	3.66709	3.56037	3.50829	3.37594	3.46349	4.00011	3.6486	3.89265	2.86262	2.52725	2.74177	2.07469	1.92817	2.9706	3.23181	3.20317	6.7645	5.94264	6.75802	6.75586	6.90001	5.99381	6.38223	6.81027	6.59953	6.39504
0.152	3.84805	4.07352	3.67614	3.56769	3.51467	3.38212	3.4707	4.01119	3.65694	3.90301	2.86478	2.52737	2.74202	2.07474	1.92882	2.9731	3.23438	3.20729	6.77912	5.96364	6.77264	6.77053	6.91218	6.01466	6.40215	6.82405	6.61658	6.41467
0.153	3.85705	4.08427	3.68519	3.57502	3.52106	3.38831	3.47792	4.02228	3.66528	3.91337	2.86694	2.5275	2.74227	2.07481	1.92947	2.9756	3.23695	3.21142	6.79331	5.98449	6.78685	6.78478	6.924	6.03533	6.42172	6.83743	6.63321	6.43397
0.154	3.86605	4.09502	3.69423	3.58234	3.52745	3.3945	3.48513	4.03337	3.67362	3.92372	2.86912	2.52763	2.74253	2.07487	1.93013	2.97812	3.23953	3.21556	6.80711	6.00518	6.80065	6.79864	6.93549	6.05583	6.44096	6.85042	6.64943	6.45292
0.155	3.87505	4.10577	3.70328	3.58967	3.53384	3.40069	3.49235	4.04446	3.68196	3.93408	2.8713	2.52776	2.74279	2.07494	1.93079	2.98064	3.24211	3.2197	6.82051	6.0257	6.81406	6.81209	6.94665	6.07615	6.45984	6.86304	6.66524	6.47152
0.156	3.88405	4.11651	3.71233	3.597	3.54023	3.40688	3.49957	4.05554	3.6903	3.94444	2.87348	2.5279	2.74305	2.075	1.93146	2.98316	3.2447	3.22385	6.83353	6.04606	6.82709	6.82517	6.9575	6.09628	6.47837	6.8753	6.68065	6.48976
0.157	3.89305	4.12726	3.72138	3.60433	3.54663	3.41307	3.50679	4.06663	3.69865	3.95479	2.87568	2.52804	2.74332	2.07508	1.93213	2.98569	3.2473	3.228	6.84618	6.06624	6.83976	6.83788	6.96806	6.11621	6.49654	6.88721	6.69566	6.50765
0.158	3.90205	4.13801	3.73043	3.61166	3.55302	3.41927	3.51401	4.07771	3.70699	3.96515	2.87787	2.52818	2.74359	2.07515	1.9328	2.98823	3.2499	3.23215	6.85847	6.08624	6.85207	6.85024	6.97833	6.13594	6.51436	6.89879	6.71028	6.52518
0.159	3.91105	4.14875	3.73948	3.61899	3.55942	3.42547	3.52123	4.08879	3.71533	3.9755	2.88008	2.52832	2.74386	2.07523	1.93348	2.99078	3.25251	3.23631	6.87042	6.10605	6.86403	6.86225	6.98833	6.15546	6.53181	6.91004	6.72451	6.54234
0.16	3.92005	4.15949	3.74853	3.62632	3.56582	3.43167	3.52845	4.09988	3.72368	3.98586	2.88229	2.52847	2.74414	2.07531	1.93417	2.99333	3.25513	3.24048	6.88204	6.12567	6.87567	6.87392	6.99807	6.17477	6.5489	6.92099	6.73836	6.55915
0.161	3.92905	4.17024	3.75758	3.63366	3.57222	3.43787	3.53568	4.11096	3.73202	3.99621	2.88451	2.52862	2.74441	2.07539	1.93486	2.99588	3.25775	3.24465	6.89334	6.14509	6.88698	6.88528	7.00756	6.19386	6.56562	6.93164	6.75185	6.57558
0.162	3.93805	4.18098	3.76663	3.64099	3.57863	3.44408	3.5429	4.12204	3.74037	4.00656	2.88673	2.52877	2.7447	2.07547	1.93555	2.99844	3.26037	3.24882	6.90433	6.16431	6.89799	6.89633	7.01681	6.21272	6.58197	6.942	6.76497	6.59166
0.163	3.94705	4.19172	3.77568	3.64833	3.58503	3.45029	3.55013	4.13312	3.74871	4.01692	2.88896	2.52892	2.74498	2.07556	1.93625	3.00101	3.263	3.25299	6.91503	6.18332	6.9087	6.90708	7.02584	6.23136	6.59796	6.9521	6.77775	6.60737
0.164	3.95605	4.20246	3.78473	3.65566	3.59144	3.45649	3.55736	4.14419	3.75706	4.02727	2.89119	2.52908	2.74527	2.07565	1.93696	3.00358	3.26564	3.25718	6.92544	6.20211	6.91912	6.91755	7.03464	6.24976	6.61359	6.96193	6.79018	6.62272
0.165	3.96505	4.2132	3.79378	3.663	3.59785	3.46271	3.56459	4.15527	3.7654	4.03762	2.89343	2.52924	2.74556	2.07574	1.93766	3.00616	3.26828	3.26136	6.93557	6.22067	6.92928	6.92774	7.04324	6.26791	6.62885	6.97151	6.80228	6.63771
0.166	3.97405	4.22393	3.80283	3.67034	3.60425	3.46892	3.57182	4.16635	3.77375	4.04797	2.89567	2.5294	2.74586	2.07583	1.93837	3.00875	3.27093	3.26555	6.94545	6.23901	6.93917	6.93767	7.05164	6.28582	6.64376	6.98085	6.81406	6.65235
0.167	3.98305	4.23467	3.81188	3.67768	3.61066	3.47513	3.57905	4.17742	3.78209	4.05832	2.89792	2.52957	2.74616	2.07593	1.93909	3.01133	3.27358	3.26974	6.95508	6.25712	6.94881	6.94734	7.05984	6.30347	6.65831	6.98996	6.82553	6.66664
0.168	3.99205	4.2454	3.82093	3.68501	3.61708	3.48134	3.58628	4.1885	3.79044	4.06867	2.90018	2.52973	2.74646	2.07603	1.93981	3.01393	3.27624	3.27393	6.96446	6.27499	6.9582	6.95677	7.06786	6.32087	6.67251	6.99884	6.83669	6.68058
0.169	4.00105	4.25614	3.82998	3.69235	3.62349	3.48756	3.59351	4.19957	3.79879	4.07901	2.90244	2.5299	2.74676	2.07613	1.94054	3.01653	3.2789	3.27813	6.97361	6.29262	6.96737	6.96597	7.0757	6.33801	6.68636	7.00752	6.84757	6.69418
0.17	4.01005	4.26687	3.83903	3.69969	3.6299	3.49378	3.60074	4.21064	3.80713	4.08936	2.9047	2.53008	2.74707	2.07624	1.94126	3.01913	3.28157	3.28234	6.98254	6.31	6.97631	6.97495	7.08337	6.35489	6.69987	7.01599	6.85816	6.70744
0.171	4.01905	4.2776	3.84808	3.70703	3.63632	3.5	3.60798	4.22171	3.81548	4.09971	2.90698	2.53025	2.74738	2.07634	1.942	3.02174	3.28424	3.28654	6.99126	6.32713	6.98504	6.98371	7.09087	6.37149	6.71304	7.02427	6.86848	6.72038
0.172	4.02804	4.28833	3.85713	3.71438	3.64273	3.50622	3.61521	4.23277	3.82382	4.11005	2.90925	2.53043	2.74769	2.07645	1.94273	3.02435	3.28692	3.29075	6.99977	6.344	6.99357	6.99227	7.09822	6.38783	6.72589	7.03235	6.87853	6.73299
0.173	4.03704	4.29906	3.86618	3.72172	3.64915	3.51244	3.62244	4.24384	3.83217	4.1204	2.91153	2.53061	2.74801	2.07657	1.94348	3.02697	3.2896	3.29496	7.00808	6.36062	7.00189	7.00062	7.10541	6.40389	6.73841	7.04026	6.88834	6.74528
0.174	4.04604	4.30978	3.87523	3.72906	3.65557	3.51866	3.62968	4.25491	3.84052	4.13074	2.91382	2.53079	2.74833	2.07668	1.94422	3.02959	3.29229	3.29918	7.01621	6.37697	7.01003	7.00879	7.11246	6.41967	6.75062	7.048	6.8979	6.75727
0.175	4.05503	4.32051	3.88428	3.7364	3.66199	3.52488	3.63691	4.26597	3.84886	4.14108	2.91611	2.53098	2.74865	2.0768	1.94497	3.03222	3.29498	3.30339	7.02415	6.39306	7.01799	7.01677	7.11936	6.43517	6.76252	7.05556	6.90722	6.76895
0.176	4.06403	4.33123	3.89332	3.74374	3.66841	3.53111	3.64415	4.27703	3.85721	4.15142	2.9184	2.53116	2.74897	2.07692	1.94572	3.03485	3.29767	3.30762	7.03192	6.40887	7.02577	7.02458	7.12613	6.4504	6.77413	7.06297	6.91633	6.78034
0.177	4.07302	4.34195	3.90237	3.75109	3.67483	3.53733	3.65139	4.28809	3.86555	4.16176	2.9207	2.53135	2.7493	2.07704	1.94648	3.03749	3.30037	3.31184	7.03952	6.42442	7.03338	7.03222	7.13277	6.46534	6.78543	7.07022	6.92521	6.79145
0.178	4.08202	4.35267	3.91142	3.75843	3.68125	3.54356	3.65862	4.29915	3.8739	4.1721	2.92301	2.53155	2.74963	2.07716	1.94724	3.04013	3.30308	3.31607	7.04696	6.4397	7.04083	7.03969	7.13927	6.48	6.79646	7.07733	6.93389	6.80227
0.179	4.09101	4.36339	3.92046	3.76577	3.68767	3.54979	3.66586	4.31021	3.88225	4.18244	2.92532	2.53174	2.74997	2.07729	1.94801	3.04278	3.30578	3.32029	7.05424	6.4547	7.04812	7.04701	7.14566	6.49438	6.80721	7.08429	6.94236	6.81283
0.18	4.1	4.3741	3.92951	3.77312	3.69409	3.55601	3.6731	4.32126	3.89059	4.19278	2.92763	2.53194	2.7503	2.07742	1.94878	3.04543	3.3085	3.32453	7.06138	6.46942	7.05526	7.05418	7.15193	6.50847	6.81769	7.09111	6.95064	6.82313
0.181	4.10899	4.38482	3.93856	3.78046	3.70051	3.56224	3.68034	4.33231	3.89894	4.20311	2.92995	2.53214	2.75064	2.07755	1.94955	3.04808	3.31121	3.32876	7.06837	6.48387	7.06226	7.0612	7.15808	6.52229	6.82792	7.09779	6.95874	6.83318
0.182	4.11798	4.39553	3.9476	3.7878	3.70694	3.56847	3.68757	4.34337	3.90728	4.21345	2.93227	2.53234	2.75098	2.07768	1.95033	3.05074	3.31393	3.333	7.07521	6.49805	7.06912	7.06808	7.16411	6.53582	6.83789	7.10435	6.96665	6.84298
0.183	4.12697	4.40624	3.95665	3.79515	3.71336	3.5747	3.69481	4.35441	3.91563	4.22378	2.93459	2.53255	2.75133	2.07781	1.95111	3.0534	3.31666	3.33724	7.08193	6.51195	7.07584	7.07482	7.17005	6.54908	6.84762	7.11078	6.9744	6.85254
0.184	4.13596	4.41695	3.96569	3.80249	3.71978	3.58093	3.70205	4.36546	3.92397	4.23411	2.93693	2.53275	2.75168	2.07795	1.95189	3.05607	3.31939	3.34148	7.08851	6.52557	7.08243	7.08144	7.17587	6.56206	6.85711	7.1171	6.98197	6.86188
0.185	4.14495	4.42766	3.97473	3.80983	3.72621	3.58717	3.70929	4.37651	3.93231	4.24444	2.93926	2.53296	2.75203	2.07809	1.95268	3.05874	3.32212	3.34572	7.09497	6.53892	7.0889	7.08792	7.1816	6.57476	6.86638	7.12329	6.98939	6.87099
0.186	4.15394	4.43836	3.98378	3.81718	3.73263	3.5934	3.71653	4.38755	3.94066	4.25477	2.9416	2.53318	2.75238	2.07823	1.95348	3.06141	3.32485	3.34997	7.1013	6.552	7.09524	7.09429	7.18722	6.5872	6.87543	7.12937	6.99665	6.87989
0.187	4.16292	4.44906	3.99282	3.82452	3.73906	3.59963	3.72377	4.39859	3.949	4.2651	2.94394	2.53339	2.75274	2.07838	1.95427	3.06409	3.32759	3.35422	7.10752	6.56481	7.10147	7.10053	7.19275	6.59936	6.88426	7.13534	7.00377	6.88859
0.188	4.17191	4.45976	4.00186	3.83187	3.74548	3.60586	3.73101	4.40963	3.95734	4.27542	2.94629	2.53361	2.7531	2.07853	1.95507	3.06677	3.33034	3.35847	7.11363	6.57735	7.10758	7.10667	7.19819	6.61126	6.8929	7.14121	7.01074	6.89708
0.189	4.18089	4.47046	4.0109	3.83921	3.75191	3.6121	3.73825	4.42067	3.96568	4.28575	2.94864	2.53382	2.75346	2.07868	1.95587	3.06946	3.33308	3.36272	7.11962	6.58963	7.11358	7.11268	7.20354	6.6229	6.90133	7.14697	7.01757	6.90539
0.19	4.18988	4.48115	4.01994	3.84655	3.75834	3.61833	3.74549	4.4317	3.97403	4.29607	2.95099	2.53405	2.75382	2.07883	1.95668	3.07214	3.33583	3.36698	7.12551	6.60164	7.11947	7.1186	7.20879	6.63428	6.90958	7.15264	7.02426	6.9135
0.191	4.19886	4.49185	4.02898	3.8539	3.76476	3.62457	3.75273	4.44273	3.98237	4.30639	2.95335	2.53427	2.75419	2.07898	1.95749	3.07484	3.33859	3.37124	7.13129	6.6134	7.12526	7.12441	7.21397	6.64541	6.91764	7.1582	7.03083	6.92144
0.192	4.20784	4.50254	4.03802	3.86124	3.77119	3.6308	3.75996	4.45376	3.99071	4.31671	2.95571	2.5345	2.75456	2.07914	1.95831	3.07753	3.34134	3.3755	7.13697	6.6249	7.13095	7.13011	7.21906	6.6563	6.92552	7.16367	7.03728	6.92921
0.193	4.21682	4.51323	4.04706	3.86858	3.77762	3.63704	3.7672	4.46479	3.99905	4.32703	2.95808	2.53472	2.75493	2.07929	1.95912	3.08023	3.34411	3.37976	7.14256	6.63615	7.13655	7.13572	7.22407	6.66694	6.93324	7.16906	7.0436	6.93681
0.194	4.2258	4.52391	4.0561	3.87593	3.78405	3.64328	3.77444	4.47581	4.00739	4.33734	2.96045	2.53495	2.75531	2.07945	1.95994	3.08293	3.34687	3.38402	7.14805	6.64716	7.14204	7.14123	7.229	6.67734	6.94079	7.17435	7.0498	6.94425
0.195	4.23478	4.53459	4.06513	3.88327	3.79047	3.64951	3.78168	4.48683	4.01573	4.34766	2.96282	2.53519	2.75569	2.07962	1.96077	3.08564	3.34964	3.38829	7.15345	6.65792	7.14745	7.14666	7.23386	6.68751	6.94818	7.17955	7.05589	6.95154
0.196	4.24375	4.54527	4.07417	3.89061	3.7969	3.65575	3.78892	4.49785	4.02407	4.35797	2.9652	2.53542	2.75607	2.07978	1.9616	3.08835	3.35241	3.39255	7.15876	6.66844	7.15276	7.15199	7.23864	6.69745	6.95541	7.18468	7.06188	6.95868
0.197	4.25273	4.55595	4.0832	3.89796	3.80333	3.66199	3.79616	4.50887	4.0324	4.36828	2.96758	2.53566	2.75645	2.07995	1.96243	3.09106	3.35518	3.39682	7.16398	6.67873	7.15799	7.15723	7.24335	6.70717	6.9625	7.18972	7.06775	6.96567
0.198	4.2617	4.56662	4.09224	3.9053	3.80976	3.66823	3.8034	4.51988	4.04074	4.37859	2.96996	2.5359	2.75684	2.08012	1.96326	3.09378	3.35796	3.40109	7.16912	6.6888	7.16313	7.16239	7.24798	6.71668	6.96945	7.19468	7.07352	6.97252
0.199	4.27067	4.5773	4.10127	3.91264	3.81618	3.67447	3.81064	4.53089	4.04908	4.38889	2.97234	2.53614	2.75723	2.08029	1.9641	3.0965	3.36073	3.40536	7.17417	6.69864	7.1682	7.16747	7.25255	6.72597	6.97626	7.19956	7.07919	6.97924
0.2	4.27964	4.58796	4.1103	3.91998	3.82261	3.6807	3.81788	4.54189	4.05742	4.3992	2.97473	2.53638	2.75762	2.08046	1.96494	3.09922	3.36352	3.40964	7.17915	6.70827	7.17318	7.17246	7.25706	6.73506	6.98293	7.20437	7.08477	6.98582
0.201	4.28861	4.59863	4.11933	3.92732	3.82904	3.68694	3.82512	4.5529	4.06575	4.4095	2.97713	2.53663	2.75801	2.08064	1.96579	3.10194	3.3663	3.41391	7.18405	6.71768	7.17808	7.17738	7.26149	6.74395	6.98947	7.20911	7.09025	6.99229
0.202	4.29758	4.60929	4.12837	3.93467	3.83547	3.69318	3.83236	4.5639	4.07409	4.4198	2.97952	2.53688	2.75841	2.08081	1.96664	3.10467	3.36909	3.41819	7.18887	6.72688	7.18291	7.18223	7.26586	6.75264	6.99589	7.21377	7.09564	6.99862
0.203	4.30655	4.61995	4.13739	3.94201	3.8419	3.69942	3.8396	4.57489	4.08242	4.4301	2.98192	2.53713	2.75881	2.08099	1.96749	3.1074	3.37188	3.42246	7.19362	6.73589	7.18766	7.18699	7.27017	6.76115	7.00219	7.21837	7.10094	7.00485
0.204	4.31551	4.63061	4.14642	3.94935	3.84832	3.70566	3.84684	4.58589	4.09075	4.44039	2.98433	2.53738	2.75921	2.08118	1.96834	3.11013	3.37467	3.42674	7.1983	6.7447	7.19234	7.19169	7.27442	6.76947	7.00837	7.22289	7.10616	7.01095
0.205	4.32448	4.64126	4.15545	3.95669	3.85475	3.7119	3.85408	4.59688	4.09908	4.45069	2.98673	2.53763	2.75961	2.08136	1.9692	3.11287	3.37747	3.43102	7.20291	6.75332	7.19696	7.19632	7.27861	6.77761	7.01444	7.22735	7.11129	7.01695
0.206	4.33344	4.65191	4.16448	3.96403	3.86118	3.71814	3.86131	4.60787	4.10742	4.46098	2.98914	2.53789	2.76002	2.08155	1.97006	3.11561	3.38027	3.43531	7.20744	6.76175	7.2015	7.20087	7.28274	6.78558	7.0204	7.23175	7.11633	7.02284
0.207	4.3424	4.66255	4.1735	3.97137	3.86761	3.72438	3.86855	4.61885	4.11575	4.47127	2.99155	2.53815	2.76042	2.08173	1.97093	3.11835	3.38307	3.43959	7.21192	6.77001	7.20598	7.20536	7.28682	6.79339	7.02625	7.23608	7.1213	7.02862
0.208	4.35136	4.67319	4.18253	3.9787	3.87403	3.73062	3.87579	4.62983	4.12408	4.48155	2.99396	2.53841	2.76084	2.08192	1.97179	3.12109	3.38587	3.44387	7.21633	6.77809	7.21039	7.20979	7.29084	6.80103	7.032	7.24035	7.12619	7.0343
0.209	4.36032	4.68383	4.19155	3.98604	3.88046	3.73686	3.88303	4.6408	4.13241	4.49184	2.99638	2.53867	2.76125	2.08212	1.97266	3.12384	3.38868	3.44816	7.22067	6.786	7.21474	7.21415	7.2948	6.80852	7.03765	7.24456	7.13101	7.03989
0.21	4.36927	4.69446	4.20057	3.99338	3.88689	3.7431	3.89026	4.65177	4.14073	4.50212	2.9988	2.53894	2.76166	2.08231	1.97354	3.12659	3.39149	3.45245	7.22495	6.79374	7.21902	7.21845	7.29871	6.81585	7.0432	7.24872	7.13575	7.04538
0.211	4.37823	4.70509	4.20959	4.00072	3.89331	3.74934	3.8975	4.66274	4.14906	4.5124	3.00122	2.53921	2.76208	2.08251	1.97441	3.12934	3.3943	3.45674	7.22917	6.80133	7.22325	7.22269	7.30257	6.82304	7.04866	7.25281	7.14042	7.05078
0.212	4.38718	4.71572	4.21861	4.00805	3.89974	3.75558	3.90474	4.67371	4.15739	4.52267	3.00365	2.53947	2.7625	2.0827	1.97529	3.1321	3.39711	3.46103	7.23334	6.80876	7.22742	7.22687	7.30638	6.83008	7.05403	7.25685	7.14503	7.05609
0.213	4.39613	4.72634	4.22763	4.01539	3.90617	3.76182	3.91197	4.68466	4.16571	4.53295	3.00608	2.53975	2.76293	2.0829	1.97618	3.13485	3.39993	3.46532	7.23744	6.81604	7.23153	7.23099	7.31014	6.83698	7.0593	7.26083	7.14956	7.06131
0.214	4.40508	4.73696	4.23664	4.02273	3.91259	3.76806	3.91921	4.69562	4.17404	4.54321	3.00851	2.54002	2.76335	2.08311	1.97706	3.13761	3.40275	3.46961	7.24149	6.82317	7.23558	7.23505	7.31385	6.84375	7.06449	7.26476	7.15403	7.06644
0.215	4.41402	4.74757	4.24566	4.03006	3.91902	3.7743	3.92645	4.70657	4.18236	4.55348	3.01094	2.5403	2.76378	2.08331	1.97795	3.14037	3.40557	3.4739	7.24549	6.83017	7.23958	7.23906	7.31751	6.85039	7.0696	7.26864	7.15843	7.0715
0.216	4.42297	4.75818	4.25467	4.03739	3.92544	3.78054	3.93368	4.71752	4.19068	4.56375	3.01338	2.54057	2.76421	2.08352	1.97884	3.14314	3.40839	3.47819	7.24943	6.83702	7.24352	7.24302	7.32113	6.8569	7.07462	7.27247	7.16277	7.07647
0.217	4.43191	4.76878	4.26369	4.04473	3.93187	3.78678	3.94092	4.72846	4.19901	4.57401	3.01582	2.54085	2.76464	2.08372	1.97974	3.1459	3.41121	3.48249	7.25331	6.84375	7.24741	7.24692	7.3247	6.86329	7.07957	7.27625	7.16705	7.08137
0.218	4.44085	4.77938	4.2727	4.05206	3.93829	3.79302	3.94815	4.73939	4.20733	4.58426	3.01826	2.54113	2.76508	2.08393	1.98063	3.14867	3.41404	3.48679	7.25715	6.85035	7.25125	7.25077	7.32823	6.86956	7.08443	7.27997	7.17126	7.08619
0.219	4.44979	4.78997	4.28171	4.05939	3.94472	3.79926	3.95538	4.75032	4.21565	4.59452	3.0207	2.54142	2.76551	2.08415	1.98153	3.15144	3.41687	3.49108	7.26093	6.85682	7.25504	7.25457	7.33171	6.87572	7.08923	7.28365	7.17542	7.09093
0.22	4.45872	4.80056	4.29071	4.06673	3.95114	3.8055	3.96262	4.76125	4.22396	4.60477	3.02315	2.5417	2.76595	2.08436	1.98244	3.15422	3.4197	3.49538	7.26467	6.86317	7.25878	7.25832	7.33515	6.88176	7.09395	7.28729	7.17952	7.0956
0.221	4.46766	4.81115	4.29972	4.07406	3.95757	3.81174	3.96985	4.77217	4.23228	4.61502	3.0256	2.54199	2.76639	2.08458	1.98334	3.15699	3.42253	3.49968	7.26836	6.8694	7.26247	7.26202	7.33854	6.8877	7.09859	7.29087	7.18357	7.10021
0.222	4.47659	4.82173	4.30873	4.08139	3.96399	3.81798	3.97708	4.78309	4.2406	4.62526	3.02805	2.54228	2.76684	2.08479	1.98425	3.15977	3.42537	3.50398	7.272	6.87552	7.26611	7.26568	7.3419	6.89353	7.10317	7.29441	7.18756	7.10474
0.223	4.48552	4.8323	4.31773	4.08872	3.97041	3.82422	3.98432	4.794	4.24891	4.6355	3.0305	2.54257	2.76728	2.08501	1.98516	3.16255	3.42821	3.50828	7.27559	6.88153	7.26971	7.26928	7.34521	6.89926	7.10768	7.29791	7.1915	7.10921
0.224	4.49444	4.84287	4.32673	4.09605	3.97683	3.83046	3.99155	4.8049	4.25722	4.64574	3.03296	2.54286	2.76773	2.08523	1.98608	3.16533	3.43105	3.51258	7.27914	6.88743	7.27326	7.27285	7.34849	6.90488	7.11212	7.30137	7.19538	7.11361
0.225	4.50337	4.85343	4.33573	4.10337	3.98326	3.8367	3.99878	4.8158	4.26554	4.65598	3.03542	2.54316	2.76818	2.08546	1.98699	3.16811	3.43389	3.51688	7.28265	6.89323	7.27677	7.27636	7.35172	6.91042	7.1165	7.30478	7.19921	7.11795
0.226	4.51229	4.86399	4.34473	4.1107	3.98968	3.84294	4.00601	4.8267	4.27385	4.66621	3.03788	2.54346	2.76863	2.08568	1.98791	3.1709	3.43673	3.52118	7.28611	6.89893	7.28023	7.27984	7.35492	6.91586	7.12081	7.30815	7.203	7.12223
0.227	4.52121	4.87454	4.35373	4.11803	3.9961	3.84917	4.01324	4.83758	4.28216	4.67643	3.04034	2.54375	2.76909	2.08591	1.98884	3.17368	3.43957	3.52549	7.28953	6.90453	7.28365	7.28327	7.35808	6.92121	7.12506	7.31147	7.20673	7.12644
0.228	4.53013	4.88509	4.36272	4.12535	4.00252	3.85541	4.02047	4.84846	4.29046	4.68665	3.0428	2.54406	2.76955	2.08614	1.98976	3.17647	3.44242	3.52979	7.2929	6.91004	7.28703	7.28666	7.3612	6.92647	7.12926	7.31476	7.21041	7.1306
0.229	4.53904	4.89563	4.37171	4.13268	4.00894	3.86165	4.0277	4.85934	4.29877	4.69687	3.04527	2.54436	2.77001	2.08637	1.99069	3.17926	3.44527	3.5341	7.29624	6.91545	7.29037	7.29001	7.36429	6.93164	7.13339	7.31801	7.21405	7.1347
0.23	4.54795	4.90616	4.38071	4.14	4.01536	3.86789	4.03493	4.87021	4.30708	4.70708	3.04774	2.54466	2.77047	2.0866	1.99162	3.18205	3.44812	3.5384	7.29953	6.92077	7.29367	7.29331	7.36734	6.93674	7.13747	7.32122	7.21764	7.13874
0.231	4.55686	4.91669	4.3897	4.14732	4.02178	3.87413	4.04215	4.88107	4.31538	4.71729	3.05021	2.54497	2.77093	2.08684	1.99255	3.18485	3.45097	3.54271	7.30279	6.926	7.29693	7.29658	7.37036	6.94175	7.14149	7.3244	7.22119	7.14273
0.232	4.56577	4.92721	4.39868	4.15465	4.02819	3.88036	4.04938	4.89193	4.32368	4.7275	3.05268	2.54528	2.7714	2.08707	1.99349	3.18764	3.45382	3.54701	7.306	6.93115	7.30015	7.29981	7.37334	6.94668	7.14545	7.32753	7.22469	7.14666
0.233	4.57467	4.93772	4.40767	4.16197	4.03461	3.8866	4.05661	4.90277	4.33198	4.7377	3.05515	2.54559	2.77186	2.08731	1.99442	3.19044	3.45667	3.55132	7.30918	6.93622	7.30333	7.303	7.37629	6.95153	7.14936	7.33063	7.22815	7.15054
0.234	4.58357	4.94823	4.41665	4.16929	4.04103	3.89284	4.06383	4.91362	4.34028	4.7479	3.05763	2.5459	2.77233	2.08755	1.99536	3.19324	3.45953	3.55563	7.31232	6.94121	7.30647	7.30616	7.3792	6.95631	7.15322	7.33369	7.23157	7.15437
0.235	4.59247	4.95873	4.42563	4.17661	4.04744	3.89907	4.07106	4.92445	4.34858	4.75809	3.06011	2.54621	2.7728	2.08779	1.99631	3.19604	3.46239	3.55994	7.31543	6.94612	7.30958	7.30927	7.38209	6.96102	7.15703	7.33672	7.23494	7.15815
0.236	4.60136	4.96922	4.43461	4.18393	4.05386	3.90531	4.07828	4.93528	4.35688	4.76828	3.06259	2.54653	2.77328	2.08804	1.99725	3.19885	3.46525	3.56425	7.3185	6.95095	7.31265	7.31235	7.38494	6.96565	7.16079	7.33972	7.23828	7.16188
0.237	4.61026	4.97971	4.44359	4.19124	4.06027	3.91155	4.08551	4.94609	4.36517	4.77846	3.06507	2.54685	2.77375	2.08828	1.9982	3.20165	3.46811	3.56856	7.32153	6.95571	7.31569	7.3154	7.38776	6.97022	7.16449	7.34267	7.24157	7.16556
0.238	4.61914	4.99018	4.45256	4.19856	4.06669	3.91778	4.09273	4.95691	4.37347	4.78863	3.06756	2.54717	2.77423	2.08853	1.99915	3.20446	3.47097	3.57287	7.32453	6.96039	7.31869	7.31841	7.39054	6.97472	7.16815	7.3456	7.24482	7.16919
0.239	4.62803	5.00065	4.46154	4.20587	4.0731	3.92402	4.09995	4.96771	4.38176	4.79881	3.07004	2.54749	2.77471	2.08878	2.0001	3.20726	3.47383	3.57718	7.32749	6.96501	7.32165	7.32138	7.3933	6.97915	7.17176	7.34849	7.24804	7.17277
0.24	4.63691	5.01112	4.47051	4.21319	4.07951	3.93025	4.10717	4.9785	4.39005	4.80897	3.07253	2.54781	2.77519	2.08903	2.00106	3.21007	3.4767	3.58149	7.33043	6.96955	7.32459	7.32433	7.39603	6.98351	7.17533	7.35136	7.25122	7.17632
0.241	4.64579	5.02157	4.47948	4.2205	4.08593	3.93648	4.11439	4.98929	4.39834	4.81913	3.07502	2.54813	2.77568	2.08928	2.00202	3.21288	3.47957	3.5858	7.33332	6.97403	7.32749	7.32724	7.39873	6.98782	7.17885	7.35419	7.25436	7.17981
0.242	4.65467	5.03202	4.48844	4.22781	4.09234	3.94272	4.12161	5.00007	4.40662	4.82929	3.07751	2.54846	2.77616	2.08953	2.00298	3.2157	3.48243	3.59011	7.33619	6.97845	7.33036	7.33011	7.4014	6.99206	7.18233	7.35698	7.25746	7.18326
0.243	4.66354	5.04246	4.49741	4.23512	4.09875	3.94895	4.12883	5.01084	4.41491	4.83944	3.08	2.54879	2.77665	2.08979	2.00394	3.21851	3.4853	3.59442	7.33903	6.9828	7.33319	7.33296	7.40404	6.99624	7.18576	7.35975	7.26053	7.18667
0.244	4.67241	5.05288	4.50637	4.24243	4.10516	3.95518	4.13605	5.0216	4.42319	4.84958	3.0825	2.54912	2.77714	2.09005	2.0049	3.22132	3.48817	3.59874	7.34183	6.98708	7.336	7.33577	7.40665	7.00037	7.18915	7.36249	7.26356	7.19004
0.245	4.68127	5.0633	4.51532	4.24974	4.11157	3.96142	4.14327	5.03235	4.43147	4.85972	3.08499	2.54945	2.77763	2.09031	2.00587	3.22414	3.49104	3.60305	7.3446	6.99131	7.33877	7.33856	7.40924	7.00444	7.1925	7.3652	7.26656	7.19336
0.246	4.69013	5.07372	4.52428	4.25705	4.11797	3.96765	4.15049	5.04309	4.43975	4.86986	3.08749	2.54978	2.77813	2.09057	2.00684	3.22696	3.49392	3.60736	7.34734	6.99548	7.34152	7.34131	7.4118	7.00845	7.19581	7.36788	7.26953	7.19665
0.247	4.69899	5.08412	4.53323	4.26435	4.12438	3.97388	4.1577	5.05382	4.44803	4.87998	3.08999	2.55012	2.77862	2.09083	2.00781	3.22978	3.49679	3.61168	7.35006	6.99959	7.34423	7.34403	7.41433	7.0124	7.19907	7.37053	7.27246	7.1999
0.248	4.70784	5.09451	4.54218	4.27166	4.13079	3.98011	4.16492	5.06454	4.4563	4.8901	3.09249	2.55046	2.77912	2.09109	2.00878	3.2326	3.49967	3.61599	7.35274	7.00364	7.34692	7.34673	7.41684	7.01631	7.2023	7.37315	7.27535	7.2031
0.249	4.71669	5.10489	4.55113	4.27896	4.13719	3.98634	4.17213	5.07526	4.46457	4.90022	3.09499	2.55079	2.77962	2.09136	2.00976	3.23542	3.50254	3.62031	7.35539	7.00763	7.34957	7.34939	7.41932	7.02016	7.20549	7.37575	7.27822	7.20627
0.25	4.72554	5.11527	4.56008	4.28626	4.1436	3.99257	4.17935	5.08596	4.47285	4.91032	3.0975	2.55113	2.78012	2.09163	2.01074	3.23824	3.50542	3.62462	7.35802	7.01158	7.3522	7.35203	7.42177	7.02396	7.20864	7.37831	7.28106	7.2094
0.251	4.73438	5.12563	4.56902	4.29357	4.15	3.9988	4.18656	5.09665	4.48111	4.92042	3.1	2.55148	2.78062	2.09189	2.01172	3.24107	3.5083	3.62894	7.36062	7.01547	7.3548	7.35464	7.4242	7.02771	7.21176	7.38086	7.28386	7.2125
0.252	4.74322	5.13598	4.57796	4.30087	4.1564	4.00503	4.19377	5.10733	4.48938	4.93052	3.10251	2.55182	2.78113	2.09217	2.0127	3.24389	3.51118	3.63325	7.36319	7.0193	7.35737	7.35722	7.42661	7.03141	7.21483	7.38337	7.28663	7.21556
0.253	4.75205	5.14632	4.58689	4.30816	4.1628	4.01126	4.20098	5.118	4.49764	4.9406	3.10502	2.55216	2.78164	2.09244	2.01368	3.24672	3.51406	3.63757	7.36573	7.02309	7.35992	7.35977	7.42899	7.03506	7.21788	7.38586	7.28937	7.21858
0.254	4.76088	5.15665	4.59583	4.31546	4.1692	4.01749	4.20819	5.12866	4.50591	4.95068	3.10753	2.55251	2.78214	2.09271	2.01467	3.24954	3.51694	3.64189	7.36825	7.02683	7.36244	7.3623	7.43135	7.03866	7.22088	7.38832	7.29209	7.22157
0.255	4.7697	5.16697	4.60476	4.32276	4.1756	4.02371	4.2154	5.1393	4.51417	4.96076	3.11004	2.55286	2.78266	2.09299	2.01566	3.25237	3.51982	3.6462	7.37074	7.03051	7.36493	7.3648	7.43368	7.04222	7.22385	7.39076	7.29477	7.22452
0.256	4.77852	5.17728	4.61368	4.33005	4.182	4.02994	4.22261	5.14994	4.52242	4.97082	3.11255	2.55321	2.78317	2.09326	2.01665	3.2552	3.52271	3.65052	7.37321	7.03415	7.3674	7.36728	7.43599	7.04574	7.22679	7.39317	7.29742	7.22744
0.257	4.78734	5.18758	4.62261	4.33734	4.1884	4.03617	4.22981	5.16056	4.53068	4.98088	3.11506	2.55356	2.78368	2.09354	2.01764	3.25803	3.52559	3.65483	7.37565	7.03775	7.36984	7.36973	7.43828	7.04921	7.2297	7.39556	7.30005	7.23033
0.258	4.79615	5.19787	4.63153	4.34463	4.1948	4.04239	4.23702	5.17117	4.53893	4.99093	3.11758	2.55391	2.7842	2.09382	2.01864	3.26087	3.52848	3.65915	7.37807	7.0413	7.37226	7.37215	7.44054	7.05263	7.23257	7.39792	7.30265	7.23319
0.259	4.80495	5.20814	4.64044	4.35192	4.20119	4.04862	4.24422	5.18176	4.54718	5.00097	3.12009	2.55427	2.78472	2.0941	2.01963	3.2637	3.53137	3.66347	7.38046	7.0448	7.37465	7.37456	7.44278	7.05602	7.23541	7.40026	7.30522	7.23601
0.26	4.81375	5.2184	4.64936	4.35921	4.20759	4.05484	4.25143	5.19235	4.55543	5.011	3.12261	2.55463	2.78523	2.09439	2.02063	3.26653	3.53425	3.66779	7.38283	7.04826	7.37702	7.37693	7.445	7.05936	7.23821	7.40258	7.30777	7.2388
0.261	4.82255	5.22865	4.65827	4.3665	4.21398	4.06106	4.25863	5.20292	4.56368	5.02103	3.12513	2.55498	2.78576	2.09467	2.02163	3.26937	3.53714	3.6721	7.38517	7.05167	7.37937	7.37928	7.4472	7.06266	7.24099	7.40488	7.31029	7.24156
0.262	4.83134	5.23888	4.66717	4.37378	4.22037	4.06729	4.26583	5.21347	4.57192	5.03104	3.12765	2.55534	2.78628	2.09496	2.02264	3.27221	3.54003	3.67642	7.38749	7.05505	7.38169	7.38161	7.44938	7.06593	7.24374	7.40715	7.31278	7.24429
0.263	4.84013	5.24911	4.67608	4.38106	4.22676	4.07351	4.27303	5.22402	4.58016	5.04105	3.13017	2.5557	2.7868	2.09525	2.02364	3.27504	3.54292	3.68074	7.38979	7.05838	7.38399	7.38392	7.45154	7.06915	7.24645	7.4094	7.31525	7.24699
0.264	4.84891	5.25932	4.68497	4.38834	4.23315	4.07973	4.28023	5.23455	4.5884	5.05105	3.13269	2.55607	2.78733	2.09554	2.02465	3.27788	3.54581	3.68506	7.39206	7.06167	7.38626	7.3862	7.45367	7.07233	7.24914	7.41162	7.31769	7.24967
0.265	4.85768	5.26951	4.69387	4.39562	4.23954	4.08595	4.28743	5.24506	4.59663	5.06104	3.13522	2.55643	2.78786	2.09583	2.02566	3.28072	3.54871	3.68938	7.39431	7.06493	7.38852	7.38846	7.45579	7.07548	7.2518	7.41383	7.3201	7.25231
0.266	4.86645	5.27969	4.70276	4.4029	4.24593	4.09217	4.29462	5.25556	4.60486	5.07102	3.13774	2.5568	2.78839	2.09612	2.02667	3.28356	3.5516	3.69369	7.39654	7.06814	7.39075	7.3907	7.45788	7.07859	7.25442	7.41601	7.3225	7.25492
0.267	4.87522	5.28986	4.71165	4.41018	4.25232	4.09839	4.30182	5.26604	4.61309	5.08099	3.14027	2.55716	2.78892	2.09642	2.02768	3.2864	3.55449	3.69801	7.39875	7.07132	7.39296	7.39292	7.45996	7.08166	7.25702	7.41818	7.32486	7.25751
0.268	4.88398	5.30001	4.72053	4.41745	4.2587	4.10461	4.30901	5.27651	4.62132	5.09095	3.1428	2.55753	2.78945	2.09671	2.02869	3.28925	3.55739	3.70233	7.40093	7.07445	7.39514	7.39511	7.46202	7.0847	7.2596	7.42032	7.32721	7.26007
0.269	4.89273	5.31015	4.72941	4.42472	4.26508	4.11083	4.3162	5.28696	4.62954	5.1009	3.14533	2.5579	2.78999	2.09701	2.02971	3.29209	3.56028	3.70665	7.4031	7.07755	7.39731	7.39729	7.46405	7.0877	7.26214	7.42244	7.32953	7.2626
0.27	4.90148	5.32027	4.73829	4.432	4.27147	4.11704	4.32339	5.2974	4.63776	5.11084	3.14785	2.55827	2.79052	2.09731	2.03073	3.29493	3.56318	3.71097	7.40524	7.08062	7.39946	7.39944	7.46607	7.09067	7.26466	7.42454	7.33183	7.26511
0.271	4.91022	5.33037	4.74716	4.43926	4.27785	4.12326	4.33058	5.30782	4.64598	5.12077	3.15039	2.55865	2.79106	2.09761	2.03175	3.29778	3.56608	3.71529	7.40737	7.08365	7.40158	7.40157	7.46807	7.0936	7.26715	7.42662	7.3341	7.26759
0.272	4.91895	5.34046	4.75602	4.44653	4.28423	4.12948	4.33777	5.31822	4.65419	5.13069	3.15292	2.55902	2.7916	2.09791	2.03277	3.30062	3.56897	3.71961	7.40947	7.08664	7.40369	7.40369	7.47005	7.0965	7.26961	7.42868	7.33636	7.27004
0.273	4.92768	5.35054	4.76488	4.4538	4.29061	4.13569	4.34496	5.3286	4.6624	5.1406	3.15545	2.5594	2.79214	2.09821	2.03379	3.30347	3.57187	3.72392	7.41155	7.0896	7.40577	7.40578	7.47201	7.09937	7.27205	7.43072	7.33859	7.27247
0.274	4.9364	5.36059	4.77374	4.46106	4.29698	4.1419	4.35215	5.33897	4.67061	5.15049	3.15798	2.55978	2.79269	2.09852	2.03482	3.30632	3.57477	3.72824	7.41362	7.09253	7.40783	7.40785	7.47395	7.1022	7.27447	7.43275	7.3408	7.27487
0.275	4.94512	5.37063	4.78259	4.46832	4.30336	4.14812	4.35933	5.34932	4.67881	5.16038	3.16052	2.56016	2.79323	2.09882	2.03585	3.30916	3.57767	3.73256	7.41566	7.09542	7.40988	7.4099	7.47588	7.10501	7.27686	7.43475	7.34298	7.27725
0.276	4.95383	5.38066	4.79144	4.47558	4.30973	4.15433	4.36651	5.35965	4.68701	5.17026	3.16305	2.56054	2.79378	2.09913	2.03688	3.31201	3.58057	3.73688	7.41768	7.09828	7.41191	7.41194	7.47779	7.10778	7.27922	7.43674	7.34515	7.27961
0.277	4.96253	5.39066	4.80028	4.48284	4.31611	4.16054	4.3737	5.36996	4.69521	5.18012	3.16559	2.56092	2.79433	2.09944	2.03791	3.31486	3.58347	3.7412	7.41969	7.10111	7.41391	7.41395	7.47968	7.11052	7.28156	7.4387	7.3473	7.28194
0.278	4.97123	5.40065	4.80912	4.49009	4.32248	4.16675	4.38088	5.38025	4.7034	5.18997	3.16813	2.5613	2.79488	2.09975	2.03894	3.31771	3.58637	3.74552	7.42168	7.10391	7.4159	7.41594	7.48155	7.11323	7.28388	7.44065	7.34942	7.28425
0.279	4.97991	5.41061	4.81796	4.49734	4.32885	4.17296	4.38805	5.39052	4.71159	5.19981	3.17067	2.56169	2.79543	2.10006	2.03997	3.32056	3.58928	3.74984	7.42365	7.10668	7.41787	7.41792	7.48341	7.11591	7.28618	7.44258	7.35153	7.28653
0.28	4.9886	5.42056	4.82678	4.50459	4.33522	4.17917	4.39523	5.40077	4.71978	5.20963	3.17321	2.56207	2.79598	2.10037	2.04101	3.32342	3.59218	3.75416	7.4256	7.10941	7.41982	7.41988	7.48525	7.11857	7.28845	7.44449	7.35361	7.28879
0.281	4.99727	5.43049	4.83561	4.51184	4.34158	4.18538	4.40241	5.41101	4.72796	5.21945	3.17575	2.56246	2.79653	2.10069	2.04205	3.32627	3.59508	3.75847	7.42753	7.11212	7.42175	7.42182	7.48707	7.12119	7.29069	7.44639	7.35568	7.29103
0.282	5.00594	5.4404	4.84442	4.51909	4.34795	4.19158	4.40958	5.42122	4.73614	5.22925	3.17829	2.56285	2.79709	2.101	2.04308	3.32912	3.59799	3.76279	7.42944	7.11479	7.42367	7.42374	7.48888	7.12379	7.29292	7.44827	7.35772	7.29325
0.283	5.0146	5.45029	4.85324	4.52633	4.35431	4.19779	4.41675	5.4314	4.74432	5.23903	3.18083	2.56324	2.79765	2.10132	2.04413	3.33198	3.60089	3.76711	7.43134	7.11744	7.42557	7.42565	7.49067	7.12636	7.29512	7.45013	7.35975	7.29544
0.284	5.02325	5.46016	4.86204	4.53357	4.36068	4.20399	4.42392	5.44157	4.75249	5.2488	3.18337	2.56363	2.79821	2.10164	2.04517	3.33483	3.6038	3.77143	7.43322	7.12006	7.42745	7.42754	7.49244	7.1289	7.2973	7.45197	7.36176	7.29762
0.285	5.03189	5.47001	4.87084	4.54081	4.36704	4.2102	4.43109	5.45171	4.76066	5.25856	3.18592	2.56403	2.79877	2.10196	2.04621	3.33769	3.6067	3.77575	7.43508	7.12265	7.42931	7.42941	7.4942	7.13142	7.29946	7.4538	7.36375	7.29977
0.286	5.04053	5.47984	4.87964	4.54805	4.3734	4.2164	4.43826	5.46183	4.76882	5.26831	3.18846	2.56442	2.79933	2.10228	2.04726	3.34054	3.60961	3.78007	7.43693	7.12522	7.43116	7.43126	7.49594	7.1339	7.3016	7.45561	7.36572	7.3019
0.287	5.04915	5.48964	4.88843	4.55528	4.37975	4.2226	4.44542	5.47193	4.77698	5.27804	3.19101	2.56482	2.79989	2.1026	2.0483	3.3434	3.61251	3.78439	7.43875	7.12776	7.43299	7.4331	7.49767	7.13637	7.30372	7.45741	7.36767	7.30401
0.288	5.05777	5.49943	4.89721	4.56251	4.38611	4.2288	4.45259	5.48201	4.78513	5.28775	3.19355	2.56521	2.80045	2.10293	2.04935	3.34626	3.61542	3.7887	7.44057	7.13027	7.4348	7.43492	7.49939	7.1388	7.30582	7.45918	7.3696	7.3061
0.289	5.06638	5.50919	4.90599	4.56974	4.39246	4.235	4.45975	5.49206	4.79328	5.29745	3.1961	2.56561	2.80102	2.10325	2.0504	3.34911	3.61833	3.79302	7.44236	7.13275	7.4366	7.43672	7.50108	7.14122	7.3079	7.46095	7.37152	7.30817
0.29	5.07499	5.51892	4.91476	4.57697	4.39882	4.2412	4.46691	5.50208	4.80143	5.30714	3.19865	2.56601	2.80159	2.10358	2.05145	3.35197	3.62124	3.79734	7.44414	7.13521	7.43838	7.43851	7.50277	7.1436	7.30995	7.46269	7.37342	7.31022
0.291	5.08358	5.52864	4.92352	4.58419	4.40517	4.2474	4.47407	5.51208	4.80957	5.31681	3.2012	2.56641	2.80216	2.10391	2.05251	3.35483	3.62415	3.80166	7.44591	7.13764	7.44014	7.44028	7.50443	7.14597	7.31199	7.46443	7.3753	7.31225
0.292	5.09216	5.53833	4.93228	4.59141	4.41152	4.2536	4.48122	5.52205	4.81771	5.32646	3.20375	2.56682	2.80273	2.10424	2.05356	3.35769	3.62706	3.80598	7.44765	7.14005	7.44189	7.44204	7.50609	7.1483	7.31401	7.46614	7.37716	7.31426
0.293	5.10074	5.54799	4.94103	4.59863	4.41786	4.25979	4.48838	5.532	4.82584	5.33609	3.2063	2.56722	2.8033	2.10457	2.05462	3.36055	3.62996	3.81029	7.44939	7.14243	7.44363	7.44378	7.50773	7.15062	7.31601	7.46784	7.37901	7.31625
0.294	5.1093	5.55763	4.94978	4.60585	4.42421	4.26599	4.49553	5.54192	4.83397	5.34571	3.20885	2.56762	2.80387	2.1049	2.05568	3.36341	3.63287	3.81461	7.45111	7.14479	7.44535	7.4455	7.50935	7.15291	7.31799	7.46953	7.38084	7.31823
0.295	5.11786	5.56725	4.95852	4.61306	4.43055	4.27218	4.50268	5.55181	4.84209	5.35532	3.2114	2.56803	2.80445	2.10523	2.05674	3.36627	3.63578	3.81893	7.45281	7.14713	7.44705	7.44721	7.51096	7.15518	7.31995	7.4712	7.38266	7.32018
0.296	5.12641	5.57684	4.96725	4.62027	4.43689	4.27837	4.50983	5.56168	4.85021	5.3649	3.21395	2.56844	2.80502	2.10557	2.0578	3.36913	3.6387	3.82325	7.45449	7.14944	7.44874	7.44891	7.51256	7.15742	7.32189	7.47286	7.38445	7.32212
0.297	5.13495	5.5864	4.97597	4.62748	4.44323	4.28456	4.51698	5.57152	4.85832	5.37447	3.21651	2.56885	2.8056	2.1059	2.05886	3.372	3.64161	3.82756	7.45617	7.15173	7.45041	7.45059	7.51415	7.15965	7.32381	7.4745	7.38624	7.32404
0.298	5.14347	5.59594	4.98469	4.63468	4.44957	4.29075	4.52412	5.58132	4.86643	5.38402	3.21906	2.56926	2.80618	2.10624	2.05992	3.37486	3.64452	3.83188	7.45783	7.15399	7.45207	7.45225	7.51572	7.16185	7.32572	7.47613	7.388	7.32594
0.299	5.15199	5.60545	4.9934	4.64188	4.4559	4.29694	4.53126	5.5911	4.87454	5.39355	3.22161	2.56967	2.80676	2.10658	2.06099	3.37772	3.64743	3.8362	7.45947	7.15623	7.45371	7.45391	7.51727	7.16403	7.32761	7.47775	7.38975	7.32782
0.3	5.1605	5.61493	5.0021	4.64908	4.46224	4.30313	4.5384	5.60085	4.88263	5.40306	3.22417	2.57008	2.80734	2.10692	2.06205	3.38059	3.65034	3.84052	7.4611	7.15845	7.45535	7.45554	7.51882	7.16619	7.32948	7.47935	7.39149	7.32968
0.301	5.16899	5.62438	5.0108	4.65628	4.46857	4.30931	4.54554	5.61057	4.89073	5.41255	3.22672	2.5705	2.80792	2.10726	2.06312	3.38345	3.65325	3.84483	7.46271	7.16065	7.45696	7.45717	7.52035	7.16832	7.33133	7.48093	7.39321	7.33153
0.302	5.17748	5.63381	5.01948	4.66347	4.4749	4.3155	4.55268	5.62026	4.89881	5.42202	3.22928	2.57091	2.80851	2.1076	2.06419	3.38631	3.65617	3.84915	7.46432	7.16283	7.45856	7.45877	7.52187	7.17044	7.33317	7.48251	7.39491	7.33336
0.303	5.18595	5.6432	5.02816	4.67066	4.48123	4.32168	4.55981	5.62991	4.9069	5.43148	3.23184	2.57133	2.80909	2.10794	2.06526	3.38918	3.65908	3.85346	7.4659	7.16498	7.46015	7.46037	7.52337	7.17254	7.33499	7.48407	7.3966	7.33518
0.304	5.19442	5.65257	5.03683	4.67784	4.48755	4.32786	4.56694	5.63953	4.91497	5.44091	3.2344	2.57175	2.80968	2.10829	2.06633	3.39205	3.66199	3.85778	7.46748	7.16712	7.46173	7.46195	7.52486	7.17461	7.33679	7.48561	7.39828	7.33698
0.305	5.20287	5.66191	5.04549	4.68502	4.49387	4.33404	4.57407	5.64912	4.92304	5.45032	3.23695	2.57217	2.81027	2.10863	2.06741	3.39491	3.66491	3.8621	7.46904	7.16923	7.46329	7.46352	7.52634	7.17667	7.33858	7.48715	7.39994	7.33876
0.306	5.21131	5.67121	5.05415	4.6922	4.50019	4.34022	4.5812	5.65868	4.93111	5.45971	3.23951	2.57259	2.81086	2.10898	2.06848	3.39778	3.66782	3.86641	7.47058	7.17133	7.46484	7.46507	7.52781	7.1787	7.34035	7.48867	7.40159	7.34052
0.307	5.21974	5.68048	5.06279	4.69938	4.50651	4.3464	4.58832	5.6682	4.93917	5.46908	3.24207	2.57301	2.81145	2.10933	2.06956	3.40064	3.67074	3.87073	7.47212	7.1734	7.46637	7.46661	7.52926	7.18072	7.3421	7.49018	7.40322	7.34227
0.308	5.22816	5.68973	5.07143	4.70655	4.51283	4.35258	4.59544	5.67769	4.94722	5.47843	3.24463	2.57343	2.81204	2.10968	2.07064	3.40351	3.67365	3.87504	7.47364	7.17545	7.46789	7.46814	7.53071	7.18272	7.34384	7.49167	7.40484	7.34401
0.309	5.23656	5.69893	5.08006	4.71372	4.51914	4.35875	4.60256	5.68715	4.95527	5.48775	3.24719	2.57386	2.81263	2.11003	2.07171	3.40638	3.67656	3.87936	7.47515	7.17749	7.4694	7.46966	7.53214	7.1847	7.34556	7.49315	7.40644	7.34573
0.31	5.24495	5.70811	5.08867	4.72088	4.52545	4.36493	4.60968	5.69656	4.96331	5.49706	3.24975	2.57428	2.81323	2.11038	2.07279	3.40925	3.67948	3.88367	7.47664	7.1795	7.4709	7.47116	7.53356	7.18666	7.34727	7.49462	7.40803	7.34743
0.311	5.25333	5.71725	5.09728	4.72805	4.53176	4.3711	4.61679	5.70595	4.97134	5.50634	3.25232	2.57471	2.81382	2.11073	2.07388	3.41212	3.68239	3.88798	7.47813	7.1815	7.47238	7.47265	7.53497	7.1886	7.34896	7.49608	7.40961	7.34912
0.312	5.2617	5.72636	5.10588	4.7352	4.53807	4.37727	4.6239	5.71529	4.97937	5.51559	3.25488	2.57513	2.81442	2.11109	2.07496	3.41498	3.68531	3.8923	7.4796	7.18347	7.47385	7.47413	7.53636	7.19052	7.35064	7.49753	7.41117	7.35079
0.313	5.27005	5.73544	5.11447	4.74236	4.54437	4.38344	4.63101	5.7246	4.98739	5.52482	3.25744	2.57556	2.81502	2.11144	2.07604	3.41785	3.68823	3.89661	7.48105	7.18543	7.47531	7.47559	7.53775	7.19242	7.3523	7.49896	7.41272	7.35245
0.314	5.2784	5.74448	5.12305	4.74951	4.55068	4.38961	4.63812	5.73387	4.9954	5.53403	3.26	2.57599	2.81562	2.1118	2.07713	3.42072	3.69114	3.90093	7.4825	7.18737	7.47676	7.47705	7.53912	7.19431	7.35395	7.50038	7.41426	7.35409
0.315	5.28672	5.75348	5.13162	4.75665	4.55698	4.39577	4.64522	5.7431	5.00341	5.54321	3.26257	2.57642	2.81622	2.11215	2.07821	3.42359	3.69406	3.90524	7.48393	7.18929	7.47819	7.47849	7.54048	7.19618	7.35558	7.50179	7.41578	7.35572
0.316	5.29504	5.76245	5.14018	4.7638	4.56327	4.40194	4.65232	5.75229	5.01141	5.55237	3.26513	2.57686	2.81682	2.11251	2.0793	3.42646	3.69697	3.90955	7.48536	7.1912	7.47962	7.47992	7.54183	7.19803	7.3572	7.50319	7.41729	7.35734
0.317	5.30334	5.77138	5.14873	4.77094	4.56957	4.4081	4.65942	5.76144	5.01941	5.5615	3.2677	2.57729	2.81743	2.11287	2.08039	3.42933	3.69989	3.91386	7.48677	7.19308	7.48103	7.48133	7.54317	7.19987	7.3588	7.50458	7.41879	7.35894
0.318	5.31162	5.78027	5.15727	4.77807	4.57586	4.41426	4.66652	5.77055	5.02739	5.57061	3.27026	2.57772	2.81803	2.11323	2.08148	3.4322	3.70281	3.91818	7.48816	7.19495	7.48243	7.48274	7.5445	7.20169	7.36039	7.50595	7.42028	7.36053
0.319	5.31989	5.78913	5.1658	4.7852	4.58215	4.42042	4.67361	5.77962	5.03537	5.57968	3.27283	2.57816	2.81864	2.1136	2.08257	3.43507	3.70572	3.92249	7.48955	7.1968	7.48381	7.48413	7.54582	7.20349	7.36197	7.50731	7.42175	7.3621
0.32	5.32815	5.79794	5.17432	4.79233	4.58843	4.42658	4.6807	5.78865	5.04334	5.58874	3.27539	2.57859	2.81924	2.11396	2.08366	3.43795	3.70864	3.9268	7.49093	7.19864	7.48519	7.48552	7.54713	7.20528	7.36353	7.50867	7.42321	7.36366
0.321	5.33639	5.80672	5.18283	4.79945	4.59472	4.43274	4.68778	5.79763	5.05131	5.59776	3.27796	2.57903	2.81985	2.11432	2.08475	3.44082	3.71156	3.93111	7.49229	7.20045	7.48655	7.48689	7.54842	7.20705	7.36508	7.51001	7.42466	7.3652
0.322	5.34462	5.81546	5.19132	4.80657	4.601	4.43889	4.69487	5.80657	5.05926	5.60676	3.28053	2.57947	2.82046	2.11469	2.08585	3.44369	3.71448	3.93542	7.49364	7.20225	7.48791	7.48825	7.54971	7.2088	7.36661	7.51134	7.4261	7.36674
0.323	5.35283	5.82416	5.19981	4.81368	4.60728	4.44504	4.70195	5.81547	5.06721	5.61572	3.28309	2.57991	2.82107	2.11506	2.08694	3.44656	3.71739	3.93973	7.49498	7.20404	7.48925	7.4896	7.55098	7.21054	7.36813	7.51266	7.42752	7.36826
0.324	5.36103	5.83282	5.20828	4.82079	4.61355	4.45119	4.70902	5.82433	5.07515	5.62466	3.28566	2.58035	2.82168	2.11542	2.08804	3.44943	3.72031	3.94404	7.49631	7.20581	7.49058	7.49093	7.55225	7.21226	7.36964	7.51397	7.42893	7.36976
0.325	5.36921	5.84144	5.21674	4.82789	4.61982	4.45734	4.7161	5.83314	5.08309	5.63357	3.28823	2.58079	2.82229	2.11579	2.08914	3.45231	3.72323	3.94835	7.49763	7.20756	7.4919	7.49226	7.5535	7.21397	7.37114	7.51527	7.43034	7.37125
0.326	5.37737	5.85001	5.22519	4.83499	4.62609	4.46349	4.72317	5.84191	5.09101	5.64245	3.2908	2.58124	2.82291	2.11616	2.09024	3.45518	3.72615	3.95266	7.49894	7.2093	7.49321	7.49358	7.55475	7.21566	7.37262	7.51656	7.43173	7.37274
0.327	5.38552	5.85854	5.23362	4.84209	4.63236	4.46964	4.73023	5.85062	5.09893	5.6513	3.29337	2.58168	2.82352	2.11653	2.09134	3.45805	3.72906	3.95697	7.50024	7.21102	7.49451	7.49488	7.55599	7.21733	7.37409	7.51783	7.4331	7.3742
0.328	5.39365	5.86704	5.24205	4.84918	4.63862	4.47578	4.7373	5.8593	5.10683	5.66012	3.29594	2.58213	2.82414	2.1169	2.09244	3.46093	3.73198	3.96128	7.50153	7.21272	7.4958	7.49618	7.55721	7.21899	7.37555	7.5191	7.43447	7.37566
0.329	5.40176	5.87548	5.25046	4.85626	4.64488	4.48192	4.74436	5.86792	5.11473	5.6689	3.29851	2.58257	2.82475	2.11728	2.09354	3.4638	3.7349	3.96559	7.50281	7.21441	7.49708	7.49746	7.55843	7.22064	7.37699	7.52036	7.43583	7.3771
0.33	5.40986	5.88389	5.25886	4.86334	4.65114	4.48806	4.75142	5.8765	5.12262	5.67766	3.30108	2.58302	2.82537	2.11765	2.09464	3.46668	3.73782	3.9699	7.50407	7.21609	7.49834	7.49874	7.55963	7.22227	7.37842	7.5216	7.43717	7.37853
0.331	5.41794	5.89225	5.26724	4.87042	4.6574	4.4942	4.75847	5.88503	5.1305	5.68638	3.30365	2.58347	2.82599	2.11803	2.09575	3.46955	3.74074	3.97421	7.50533	7.21775	7.4996	7.5	7.56083	7.22389	7.37984	7.52284	7.43851	7.37995
0.332	5.426	5.90056	5.27561	4.87749	4.66365	4.50034	4.76552	5.89352	5.13838	5.69507	3.30622	2.58392	2.82661	2.1184	2.09685	3.47242	3.74365	3.97851	7.50658	7.2194	7.50085	7.50125	7.56202	7.22549	7.38125	7.52407	7.43983	7.38136
0.333	5.43404	5.90883	5.28397	4.88456	4.66989	4.50647	4.77256	5.90195	5.14624	5.70373	3.30879	2.58437	2.82723	2.11878	2.09796	3.4753	3.74657	3.98282	7.50781	7.22103	7.50209	7.5025	7.56319	7.22708	7.38265	7.52529	7.44114	7.38275
0.334	5.44207	5.91706	5.29231	4.89162	4.67614	4.51261	4.77961	5.91033	5.15409	5.71235	3.31136	2.58482	2.82786	2.11916	2.09907	3.47817	3.74949	3.98713	7.50904	7.22265	7.50331	7.50373	7.56436	7.22866	7.38403	7.52649	7.44244	7.38414
0.335	5.45008	5.92523	5.30064	4.89867	4.68238	4.51874	4.78665	5.91866	5.16194	5.72094	3.31394	2.58527	2.82848	2.11954	2.10018	3.48105	3.75241	3.99143	7.51026	7.22425	7.50453	7.50495	7.56552	7.23022	7.38541	7.52769	7.44373	7.38551
0.336	5.45806	5.93336	5.30896	4.90572	4.68862	4.52487	4.79368	5.92695	5.16977	5.72949	3.31651	2.58573	2.8291	2.11992	2.10129	3.48392	3.75533	3.99574	7.51146	7.22584	7.50574	7.50617	7.56667	7.23177	7.38677	7.52888	7.44501	7.38687
0.337	5.46603	5.94145	5.31726	4.91277	4.69485	4.53099	4.80071	5.93518	5.1776	5.73801	3.31908	2.58618	2.82973	2.1203	2.1024	3.4868	3.75825	4.00005	7.51266	7.22741	7.50694	7.50737	7.56781	7.2333	7.38812	7.53006	7.44629	7.38822
0.338	5.47398	5.94948	5.32555	4.9198	4.70108	4.53712	4.80774	5.94336	5.18541	5.7465	3.32165	2.58664	2.83036	2.12068	2.10351	3.48968	3.76117	4.00435	7.51385	7.22898	7.50813	7.50857	7.56894	7.23482	7.38945	7.53123	7.44755	7.38955
0.339	5.48191	5.95747	5.33382	4.92684	4.70731	4.54324	4.81476	5.95148	5.19322	5.75494	3.32423	2.58709	2.83098	2.12106	2.10462	3.49255	3.76408	4.00865	7.51503	7.23052	7.50931	7.50975	7.57007	7.23633	7.39078	7.53239	7.4488	7.39088
0.34	5.48982	5.96541	5.34207	4.93386	4.71353	4.54936	4.82178	5.95956	5.20101	5.76335	3.3268	2.58755	2.83161	2.12145	2.10573	3.49543	3.767	4.01296	7.5162	7.23206	7.51047	7.51093	7.57118	7.23783	7.3921	7.53354	7.45004	7.3922
0.341	5.49771	5.9733	5.35031	4.94089	4.71975	4.55548	4.8288	5.96758	5.20879	5.77173	3.32937	2.58801	2.83224	2.12183	2.10685	3.4983	3.76992	4.01726	7.51736	7.23358	7.51164	7.51209	7.57229	7.23931	7.3934	7.53468	7.45127	7.3935
0.342	5.50558	5.98114	5.35853	4.9479	4.72597	4.56159	4.83581	5.97554	5.21657	5.78006	3.33195	2.58847	2.83287	2.12222	2.10796	3.50118	3.77284	4.02157	7.51851	7.23509	7.51279	7.51325	7.57338	7.24078	7.3947	7.53581	7.45249	7.39479
0.343	5.51342	5.98893	5.36674	4.95491	4.73218	4.5677	4.84281	5.98345	5.22433	5.78836	3.33452	2.58893	2.8335	2.12261	2.10908	3.50406	3.77576	4.02587	7.51965	7.23658	7.51393	7.5144	7.57447	7.24224	7.39598	7.53694	7.4537	7.39608
0.344	5.52125	5.99667	5.37493	4.96192	4.73839	4.57382	4.84982	5.99131	5.23208	5.79662	3.3371	2.58939	2.83414	2.12299	2.1102	3.50693	3.77868	4.03017	7.52078	7.23807	7.51506	7.51554	7.57555	7.24368	7.39725	7.53805	7.4549	7.39735
0.345	5.52905	6.00436	5.38311	4.96891	4.7446	4.57992	4.85681	5.99911	5.23982	5.80484	3.33967	2.58985	2.83477	2.12338	2.11132	3.50981	3.7816	4.03447	7.52191	7.23954	7.51619	7.51667	7.57662	7.24511	7.39852	7.53916	7.45609	7.39861
0.346	5.53683	6.01199	5.39127	4.97591	4.7508	4.58603	4.86381	6.00686	5.24755	5.81302	3.34225	2.59032	2.83541	2.12377	2.11243	3.51269	3.78452	4.03877	7.52302	7.24099	7.5173	7.51779	7.57768	7.24653	7.39977	7.54026	7.45727	7.39986
0.347	5.54459	6.01958	5.39941	4.98289	4.757	4.59213	4.8708	6.01455	5.25526	5.82116	3.34483	2.59078	2.83604	2.12416	2.11355	3.51556	3.78743	4.04307	7.52413	7.24244	7.51841	7.5189	7.57874	7.24794	7.40101	7.54135	7.45844	7.4011
0.348	5.55233	6.02711	5.40753	4.98987	4.76319	4.59823	4.87778	6.02219	5.26297	5.82926	3.3474	2.59124	2.83668	2.12456	2.11468	3.51844	3.79035	4.04738	7.52522	7.24387	7.51951	7.52001	7.57979	7.24934	7.40224	7.54243	7.45961	7.40234
0.349	5.56005	6.03459	5.41563	4.99684	4.76938	4.60433	4.88476	6.02976	5.27066	5.83732	3.34998	2.59171	2.83732	2.12495	2.1158	3.52132	3.79327	4.05167	7.52631	7.24529	7.52059	7.5211	7.58082	7.25072	7.40346	7.5435	7.46076	7.40356
0.35	5.56774	6.04202	5.42372	5.00381	4.77557	4.61043	4.89174	6.03729	5.27834	5.84534	3.35255	2.59218	2.83795	2.12534	2.11692	3.5242	3.79619	4.05597	7.52739	7.2467	7.52167	7.52219	7.58185	7.25209	7.40467	7.54456	7.46191	7.40477
0.351	5.57541	6.04939	5.43179	5.01077	4.78175	4.61652	4.89871	6.04475	5.28601	5.85331	3.35513	2.59265	2.83859	2.12574	2.11804	3.52707	3.79911	4.06027	7.52846	7.2481	7.52275	7.52327	7.58288	7.25346	7.40587	7.54562	7.46304	7.40597
0.352	5.58305	6.05672	5.43984	5.01772	4.78793	4.62261	4.90567	6.05215	5.29367	5.86124	3.35771	2.59311	2.83923	2.12613	2.11917	3.52995	3.80203	4.06457	7.52953	7.24948	7.52381	7.52434	7.58389	7.2548	7.40706	7.54667	7.46417	7.40716
0.353	5.59067	6.06398	5.44787	5.02467	4.7941	4.6287	4.91263	6.0595	5.30131	5.86913	3.36029	2.59358	2.83988	2.12653	2.12029	3.53283	3.80495	4.06887	7.53058	7.25086	7.52487	7.5254	7.5849	7.25614	7.40825	7.5477	7.46529	7.40834
0.354	5.59827	6.0712	5.45588	5.0316	4.80027	4.63479	4.91959	6.06679	5.30894	5.87698	3.36286	2.59406	2.84052	2.12693	2.12142	3.53571	3.80786	4.07317	7.53163	7.25222	7.52591	7.52645	7.5859	7.25747	7.40942	7.54874	7.4664	7.40952
0.355	5.60584	6.07835	5.46387	5.03854	4.80643	4.64087	4.92654	6.07402	5.31656	5.88478	3.36544	2.59453	2.84116	2.12732	2.12255	3.53859	3.81078	4.07746	7.53267	7.25357	7.52695	7.5275	7.58689	7.25879	7.41058	7.54976	7.4675	7.41068
0.356	5.61338	6.08546	5.47185	5.04546	4.81259	4.64695	4.93348	6.08119	5.32416	5.89254	3.36802	2.595	2.84181	2.12772	2.12367	3.54146	3.8137	4.08176	7.5337	7.25491	7.52798	7.52853	7.58787	7.26009	7.41173	7.55077	7.46859	7.41183
0.357	5.6209	6.09251	5.4798	5.05238	4.81875	4.65303	4.94042	6.08831	5.33175	5.90025	3.3706	2.59547	2.84245	2.12812	2.1248	3.54434	3.81662	4.08606	7.53472	7.25624	7.52901	7.52956	7.58885	7.26139	7.41288	7.55178	7.46967	7.41298
0.358	5.6284	6.0995	5.48773	5.05929	4.8249	4.65911	4.94736	6.09536	5.33933	5.90792	3.37318	2.59595	2.8431	2.12853	2.12593	3.54722	3.81954	4.09035	7.53573	7.25756	7.53002	7.53058	7.58981	7.26267	7.41401	7.55278	7.47075	7.41411
0.359	5.63587	6.10644	5.49564	5.06619	4.83105	4.66518	4.95429	6.10235	5.34689	5.91555	3.37575	2.59642	2.84374	2.12893	2.12706	3.5501	3.82245	4.09465	7.53674	7.25886	7.53103	7.5316	7.59078	7.26394	7.41514	7.55377	7.47182	7.41524
0.36	5.64331	6.11332	5.50353	5.07308	4.83719	4.67125	4.96121	6.10929	5.35444	5.92312	3.37833	2.5969	2.84439	2.12933	2.12819	3.55298	3.82537	4.09894	7.53774	7.26016	7.53203	7.5326	7.59173	7.26521	7.41625	7.55476	7.47287	7.41635
0.361	5.65073	6.12015	5.5114	5.07997	4.84332	4.67731	4.96813	6.11616	5.36197	5.93066	3.38091	2.59738	2.84504	2.12973	2.12933	3.55586	3.82829	4.10323	7.53873	7.26144	7.53302	7.5336	7.59267	7.26646	7.41736	7.55573	7.47393	7.41746
0.362	5.65812	6.12692	5.51925	5.08685	4.84946	4.68338	4.97504	6.12298	5.36949	5.93814	3.38349	2.59785	2.84569	2.13014	2.13046	3.55873	3.83121	4.10753	7.53971	7.26272	7.534	7.53459	7.59361	7.2677	7.41846	7.5567	7.47497	7.41856
0.363	5.66548	6.13363	5.52708	5.09372	4.85558	4.68944	4.98195	6.12973	5.377	5.94558	3.38607	2.59833	2.84634	2.13054	2.13159	3.56161	3.83412	4.11182	7.54069	7.26398	7.53498	7.53557	7.59455	7.26893	7.41954	7.55766	7.476	7.41965
0.364	5.67281	6.14029	5.53488	5.10058	4.86171	4.6955	4.98885	6.13642	5.38448	5.95297	3.38865	2.59881	2.84699	2.13095	2.13273	3.56449	3.83704	4.11611	7.54166	7.26523	7.53595	7.53655	7.59547	7.27015	7.42062	7.55862	7.47703	7.42073
0.365	5.68012	6.14689	5.54266	5.10743	4.86783	4.70155	4.99575	6.14306	5.39196	5.96031	3.39123	2.59929	2.84764	2.13136	2.13386	3.56737	3.83996	4.1204	7.54262	7.26648	7.53691	7.53751	7.59639	7.27136	7.4217	7.55956	7.47805	7.4218
0.366	5.68739	6.15344	5.55042	5.11428	4.87394	4.7076	5.00263	6.14963	5.39942	5.96761	3.39381	2.59977	2.8483	2.13177	2.135	3.57025	3.84288	4.12469	7.54357	7.26771	7.53786	7.53847	7.5973	7.27257	7.42276	7.5605	7.47906	7.42287
0.367	5.69464	6.15993	5.55815	5.12112	4.88005	4.71365	5.00952	6.15614	5.40686	5.97485	3.39639	2.60025	2.84895	2.13217	2.13613	3.57313	3.84579	4.12898	7.54452	7.26893	7.53881	7.53942	7.5982	7.27376	7.42381	7.56143	7.48006	7.42392
0.368	5.70186	6.16636	5.56586	5.12795	4.88615	4.71969	5.01639	6.1626	5.41429	5.98205	3.39897	2.60074	2.84961	2.13258	2.13727	3.57601	3.84871	4.13327	7.54545	7.27015	7.53975	7.54037	7.5991	7.27494	7.42486	7.56236	7.48105	7.42497
0.369	5.70905	6.17273	5.57355	5.13477	4.89225	4.72574	5.02327	6.16899	5.4217	5.9892	3.40155	2.60122	2.85026	2.133	2.13841	3.57889	3.85163	4.13756	7.54639	7.27135	7.54068	7.54131	7.59999	7.27611	7.4259	7.56328	7.48204	7.42601
0.37	5.71622	6.17905	5.58121	5.14158	4.89834	4.73177	5.03013	6.17532	5.42909	5.99629	3.40413	2.60171	2.85092	2.13341	2.13955	3.58177	3.85454	4.14185	7.54731	7.27254	7.5416	7.54224	7.60087	7.27728	7.42693	7.56419	7.48302	7.42704
0.371	5.72335	6.18531	5.58885	5.14838	4.90442	4.73781	5.03699	6.18159	5.43647	6.00334	3.40671	2.60219	2.85158	2.13382	2.14069	3.58465	3.85746	4.14613	7.54823	7.27373	7.54252	7.54316	7.60175	7.27843	7.42795	7.56509	7.48399	7.42806
0.372	5.73045	6.19151	5.59647	5.15517	4.9105	4.74384	5.04384	6.1878	5.44383	6.01034	3.40929	2.60268	2.85223	2.13423	2.14183	3.58752	3.86038	4.15042	7.54914	7.2749	7.54343	7.54408	7.60262	7.27957	7.42896	7.56599	7.48496	7.42908
0.373	5.73752	6.19766	5.60405	5.16196	4.91658	4.74987	5.05068	6.19395	5.45118	6.01729	3.41188	2.60316	2.85289	2.13465	2.14297	3.5904	3.86329	4.15471	7.55004	7.27606	7.54433	7.54499	7.60348	7.28071	7.42996	7.56688	7.48591	7.43008
0.374	5.74456	6.20375	5.61162	5.16873	4.92265	4.75589	5.05752	6.20004	5.45851	6.02419	3.41446	2.60365	2.85355	2.13506	2.14411	3.59328	3.86621	4.15899	7.55093	7.27722	7.54523	7.54589	7.60434	7.28183	7.43096	7.56776	7.48686	7.43108
0.375	5.75156	6.20978	5.61915	5.1755	4.92871	4.76192	5.06435	6.20607	5.46582	6.03103	3.41704	2.60414	2.85421	2.13548	2.14525	3.59616	3.86912	4.16328	7.55182	7.27836	7.54612	7.54678	7.60519	7.28295	7.43195	7.56864	7.4878	7.43207
0.376	5.75854	6.21576	5.62667	5.18225	4.93477	4.76793	5.07118	6.21203	5.47311	6.03783	3.41962	2.60463	2.85487	2.13589	2.1464	3.59904	3.87204	4.16756	7.55271	7.2795	7.547	7.54767	7.60603	7.28406	7.43293	7.56951	7.48874	7.43305
0.377	5.76549	6.22168	5.63415	5.189	4.94083	4.77395	5.07799	6.21794	5.48038	6.04457	3.4222	2.60512	2.85554	2.13631	2.14754	3.60192	3.87495	4.17184	7.55358	7.28063	7.54788	7.54855	7.60687	7.28516	7.4339	7.57037	7.48967	7.43403
0.378	5.7724	6.22754	5.64161	5.19574	4.94687	4.77996	5.0848	6.22379	5.48764	6.05126	3.42478	2.60561	2.8562	2.13673	2.14869	3.6048	3.87787	4.17613	7.55445	7.28175	7.54875	7.54943	7.6077	7.28625	7.43487	7.57123	7.49059	7.435
0.379	5.77928	6.23334	5.64904	5.20246	4.95291	4.78597	5.09161	6.22958	5.49487	6.0579	3.42737	2.6061	2.85686	2.13715	2.14983	3.60768	3.88078	4.18041	7.55531	7.28286	7.54961	7.5503	7.60852	7.28733	7.43582	7.57208	7.4915	7.43595
0.38	5.78613	6.23909	5.65644	5.20918	4.95895	4.79197	5.0984	6.23531	5.50209	6.06449	3.42995	2.60659	2.85753	2.13757	2.15098	3.61056	3.8837	4.18469	7.55617	7.28396	7.55046	7.55116	7.60934	7.2884	7.43677	7.57292	7.49241	7.43691
0.381	5.79294	6.24479	5.66382	5.21588	4.96498	4.79797	5.10519	6.24098	5.50929	6.07103	3.43253	2.60709	2.85819	2.13799	2.15212	3.61344	3.88661	4.18897	7.55702	7.28505	7.55131	7.55201	7.61015	7.28946	7.43772	7.57376	7.49331	7.43785
0.382	5.79972	6.25042	5.67117	5.22258	4.971	4.80396	5.11197	6.2466	5.51647	6.07751	3.43511	2.60758	2.85886	2.13841	2.15327	3.61632	3.88953	4.19325	7.55786	7.28613	7.55216	7.55286	7.61096	7.29052	7.43865	7.57459	7.4942	7.43879
0.383	5.80647	6.25601	5.67848	5.22927	4.97702	4.80996	5.11874	6.25215	5.52363	6.08394	3.4377	2.60807	2.85952	2.13883	2.15442	3.6192	3.89244	4.19753	7.55869	7.2872	7.55299	7.55371	7.61175	7.29156	7.43958	7.57541	7.49509	7.43972
0.384	5.81319	6.26153	5.68577	5.23594	4.98303	4.81594	5.12551	6.25765	5.53077	6.09032	3.44028	2.60857	2.86019	2.13925	2.15557	3.62207	3.89536	4.20181	7.55952	7.28827	7.55382	7.55454	7.61255	7.2926	7.4405	7.57623	7.49597	7.44064
0.385	5.81986	6.267	5.69304	5.2426	4.98903	4.82193	5.13227	6.26308	5.53789	6.09665	3.44286	2.60907	2.86086	2.13967	2.15671	3.62495	3.89827	4.20608	7.56035	7.28933	7.55465	7.55537	7.61334	7.29363	7.44141	7.57704	7.49684	7.44155
0.386	5.82651	6.27241	5.70027	5.24926	4.99503	4.82791	5.13901	6.26846	5.54499	6.10292	3.44544	2.60956	2.86153	2.1401	2.15786	3.62783	3.90118	4.21036	7.56116	7.29038	7.55546	7.55619	7.61412	7.29465	7.44232	7.57785	7.49771	7.44246
0.387	5.83312	6.27777	5.70747	5.2559	5.00102	4.83388	5.14576	6.27378	5.55207	6.10914	3.44803	2.61006	2.8622	2.14052	2.15902	3.63071	3.9041	4.21464	7.56197	7.29142	7.55627	7.55701	7.61489	7.29567	7.44321	7.57865	7.49857	7.44336
0.388	5.8397	6.28308	5.71464	5.26253	5.007	4.83985	5.15249	6.27905	5.55913	6.11531	3.45061	2.61056	2.86287	2.14095	2.16017	3.63359	3.90701	4.21891	7.56278	7.29245	7.55708	7.55782	7.61566	7.29667	7.44411	7.57944	7.49942	7.44426
0.389	5.84624	6.28833	5.72178	5.26915	5.01298	4.84582	5.15921	6.28426	5.56617	6.12143	3.45319	2.61106	2.86354	2.14138	2.16132	3.63647	3.90992	4.22319	7.56358	7.29347	7.55788	7.55863	7.61642	7.29767	7.44499	7.58023	7.50026	7.44514
0.39	5.85274	6.29352	5.72889	5.27575	5.01895	4.85179	5.16593	6.28941	5.57318	6.12749	3.45578	2.61156	2.86421	2.1418	2.16247	3.63935	3.91284	4.22746	7.56437	7.29449	7.55867	7.55942	7.61718	7.29866	7.44587	7.58101	7.5011	7.44602
0.391	5.85921	6.29866	5.73597	5.28235	5.02491	4.85774	5.17264	6.2945	5.58018	6.1335	3.45836	2.61206	2.86488	2.14223	2.16362	3.64223	3.91575	4.23173	7.56515	7.2955	7.55946	7.56022	7.61793	7.29964	7.44674	7.58178	7.50194	7.44689
0.392	5.86564	6.30375	5.74302	5.28893	5.03087	4.8637	5.17933	6.29954	5.58715	6.13945	3.46094	2.61256	2.86556	2.14266	2.16478	3.64511	3.91866	4.23601	7.56593	7.29649	7.56024	7.561	7.61868	7.30061	7.4476	7.58255	7.50277	7.44776
0.393	5.87204	6.30879	5.75004	5.2955	5.03682	4.86965	5.18602	6.30453	5.5941	6.14535	3.46353	2.61306	2.86623	2.14309	2.16593	3.64799	3.92157	4.24028	7.56671	7.29749	7.56101	7.56178	7.61942	7.30158	7.44846	7.58332	7.50359	7.44862
0.394	5.8784	6.31377	5.75703	5.30206	5.04276	4.87559	5.19271	6.30945	5.60103	6.1512	3.46611	2.61356	2.86691	2.14352	2.16708	3.65087	3.92449	4.24455	7.56748	7.29847	7.56178	7.56256	7.62016	7.30254	7.44931	7.58407	7.5044	7.44947
0.395	5.88472	6.31869	5.76398	5.30861	5.0487	4.88153	5.19938	6.31433	5.60794	6.157	3.46869	2.61407	2.86758	2.14395	2.16824	3.65374	3.9274	4.24882	7.56824	7.29945	7.56254	7.56333	7.62089	7.30349	7.45015	7.58483	7.50521	7.45032
0.396	5.89101	6.32357	5.7709	5.31515	5.05462	4.88747	5.20604	6.31915	5.61482	6.16274	3.47128	2.61457	2.86826	2.14438	2.1694	3.65662	3.93031	4.25308	7.56899	7.30041	7.5633	7.56409	7.62161	7.30443	7.45098	7.58557	7.50601	7.45116
0.397	5.89726	6.32839	5.77779	5.32167	5.06055	4.8934	5.21269	6.32392	5.62168	6.16843	3.47386	2.61508	2.86893	2.14481	2.17055	3.6595	3.93322	4.25735	7.56974	7.30138	7.56405	7.56484	7.62233	7.30537	7.45181	7.58631	7.50681	7.45199
0.398	5.90347	6.33317	5.78464	5.32818	5.06646	4.89933	5.21934	6.32863	5.62852	6.17407	3.47644	2.61558	2.86961	2.14524	2.17171	3.66238	3.93613	4.26162	7.57049	7.30233	7.56479	7.5656	7.62304	7.3063	7.45264	7.58705	7.5076	7.45281
0.399	5.90964	6.33789	5.79146	5.33467	5.07236	4.90525	5.22597	6.33329	5.63533	6.17965	3.47903	2.61609	2.87029	2.14568	2.17287	3.66526	3.93904	4.26589	7.57123	7.30327	7.56553	7.56634	7.62375	7.30722	7.45345	7.58778	7.50838	7.45363
0.4	5.91578	6.34256	5.79825	5.34116	5.07826	4.91117	5.2326	6.3379	5.64212	6.18519	3.48161	2.61659	2.87097	2.14611	2.17402	3.66814	3.94195	4.27015	7.57196	7.30421	7.56627	7.56708	7.62445	7.30813	7.45426	7.5885	7.50916	7.45445
0.401	5.92188	6.34718	5.805	5.34763	5.08415	4.91708	5.23921	6.34246	5.64888	6.19066	3.4842	2.6171	2.87165	2.14655	2.17518	3.67102	3.94486	4.27442	7.57269	7.30514	7.567	7.56781	7.62515	7.30904	7.45507	7.58922	7.50993	7.45525
0.402	5.92794	6.35175	5.81172	5.35408	5.09003	4.92299	5.24582	6.34696	5.65562	6.19609	3.48678	2.61761	2.87233	2.14698	2.17634	3.67389	3.94777	4.27868	7.57341	7.30607	7.56772	7.56854	7.62584	7.30994	7.45586	7.58993	7.5107	7.45605
0.403	5.93396	6.35627	5.8184	5.36052	5.09591	4.92889	5.25241	6.35142	5.66234	6.20147	3.48936	2.61812	2.87301	2.14742	2.1775	3.67677	3.95068	4.28294	7.57413	7.30698	7.56844	7.56927	7.62652	7.31083	7.45665	7.59064	7.51146	7.45685
0.404	5.93994	6.36074	5.82505	5.36695	5.10177	4.93479	5.259	6.35582	5.66903	6.20679	3.49195	2.61863	2.87369	2.14786	2.17866	3.67965	3.95359	4.2872	7.57484	7.30789	7.56915	7.56998	7.6272	7.31171	7.45744	7.59134	7.51221	7.45763
0.405	5.94588	6.36516	5.83166	5.37337	5.10763	4.94068	5.26557	6.36018	5.67569	6.21206	3.49453	2.61914	2.87437	2.14829	2.17982	3.68253	3.9565	4.29146	7.57555	7.30879	7.56985	7.57069	7.62788	7.31259	7.45822	7.59203	7.51296	7.45841
0.406	5.95179	6.36953	5.83824	5.37977	5.11348	4.94657	5.27213	6.36448	5.68233	6.21728	3.49712	2.61965	2.87505	2.14873	2.18098	3.68541	3.9594	4.29572	7.57625	7.30969	7.57055	7.5714	7.62855	7.31346	7.45899	7.59273	7.51371	7.45919
0.407	5.95766	6.37386	5.84478	5.38616	5.11932	4.95245	5.27869	6.36874	5.68895	6.22245	3.4997	2.62016	2.87574	2.14917	2.18214	3.68829	3.96231	4.29998	7.57694	7.31058	7.57125	7.5721	7.62922	7.31433	7.45976	7.59341	7.51444	7.45996
0.408	5.96348	6.37814	5.85129	5.39253	5.12515	4.95833	5.28523	6.37295	5.69554	6.22756	3.50228	2.62067	2.87642	2.14961	2.18331	3.69116	3.96522	4.30424	7.57763	7.31146	7.57194	7.5728	7.62988	7.31519	7.46052	7.59409	7.51518	7.46072
0.409	5.96927	6.38237	5.85776	5.39889	5.13097	4.9642	5.29176	6.37711	5.7021	6.23263	3.50487	2.62118	2.87711	2.15005	2.18447	3.69404	3.96813	4.3085	7.57831	7.31233	7.57262	7.57349	7.63053	7.31604	7.46127	7.59477	7.5159	7.46148
0.41	5.97502	6.38655	5.86419	5.40523	5.13679	4.97006	5.29828	6.38122	5.70863	6.23764	3.50745	2.6217	2.87779	2.15049	2.18563	3.69692	3.97103	4.31275	7.57899	7.3132	7.5733	7.57417	7.63118	7.31688	7.46202	7.59544	7.51662	7.46223
0.411	5.98073	6.39069	5.87059	5.41156	5.1426	4.97592	5.30479	6.38529	5.71514	6.2426	3.51004	2.62221	2.87848	2.15093	2.1868	3.6998	3.97394	4.31701	7.57967	7.31406	7.57398	7.57485	7.63183	7.31772	7.46276	7.5961	7.51734	7.46298
0.412	5.98639	6.39478	5.87695	5.41787	5.14839	4.98178	5.31129	6.38931	5.72162	6.24752	3.51262	2.62273	2.87916	2.15138	2.18796	3.70268	3.97685	4.32126	7.58034	7.31491	7.57465	7.57553	7.63247	7.31855	7.4635	7.59676	7.51805	7.46372
0.413	5.99202	6.39883	5.88327	5.42417	5.15418	4.98763	5.31778	6.39328	5.72808	6.25238	3.51521	2.62324	2.87985	2.15182	2.18913	3.70555	3.97975	4.32552	7.581	7.31576	7.57531	7.5762	7.6331	7.31937	7.46423	7.59742	7.51875	7.46445
0.414	5.99761	6.40283	5.88956	5.43045	5.15996	4.99347	5.32425	6.39721	5.73451	6.25719	3.51779	2.62376	2.88054	2.15226	2.19029	3.70843	3.98266	4.32977	7.58166	7.3166	7.57597	7.57686	7.63373	7.32019	7.46495	7.59807	7.51945	7.46518
0.415	6.00316	6.40679	5.8958	5.43672	5.16573	4.99931	5.33071	6.4011	5.7409	6.26196	3.52037	2.62427	2.88123	2.15271	2.19146	3.71131	3.98557	4.33402	7.58231	7.31743	7.57662	7.57752	7.63436	7.321	7.46567	7.59871	7.52015	7.4659
0.416	6.00867	6.41071	5.90201	5.44297	5.17149	5.00514	5.33717	6.40494	5.74728	6.26667	3.52296	2.62479	2.88191	2.15315	2.19262	3.71418	3.98847	4.33827	7.58296	7.31826	7.57727	7.57818	7.63498	7.32181	7.46638	7.59935	7.52083	7.46662
0.417	6.01414	6.41458	5.90818	5.4492	5.17724	5.01096	5.3436	6.40874	5.75362	6.27134	3.52554	2.62531	2.8826	2.1536	2.19379	3.71706	3.99138	4.34252	7.5836	7.31908	7.57791	7.57883	7.6356	7.3226	7.46709	7.59998	7.52152	7.46733
0.418	6.01956	6.41841	5.91432	5.45542	5.18299	5.01678	5.35003	6.41249	5.75993	6.27595	3.52813	2.62583	2.88329	2.15404	2.19496	3.71994	3.99428	4.34677	7.58424	7.31989	7.57855	7.57947	7.63621	7.3234	7.46779	7.60061	7.5222	7.46803
0.419	6.02495	6.4222	5.92041	5.46162	5.18872	5.0226	5.35645	6.41621	5.76622	6.28052	3.53071	2.62634	2.88398	2.15449	2.19612	3.72282	3.99718	4.35101	7.58487	7.3207	7.57919	7.58011	7.63681	7.32418	7.46849	7.60124	7.52287	7.46873
0.42	6.0303	6.42594	5.92647	5.46781	5.19444	5.0284	5.36285	6.41988	5.77248	6.28504	3.5333	2.62686	2.88468	2.15494	2.19729	3.72569	4.00009	4.35526	7.5855	7.3215	7.57981	7.58074	7.63742	7.32496	7.46918	7.60186	7.52354	7.46943
0.421	6.03561	6.42965	5.93249	5.47397	5.20015	5.0342	5.36924	6.42351	5.7787	6.28952	3.53588	2.62738	2.88537	2.15538	2.19846	3.72857	4.00299	4.3595	7.58613	7.32229	7.58044	7.58137	7.63801	7.32574	7.46986	7.60248	7.5242	7.47012
0.422	6.04087	6.43331	5.93846	5.48013	5.20586	5.04	5.37561	6.4271	5.7849	6.29394	3.53847	2.6279	2.88606	2.15583	2.19963	3.73145	4.00589	4.36375	7.58674	7.32308	7.58106	7.582	7.63861	7.3265	7.47054	7.60309	7.52486	7.4708
0.423	6.0461	6.43693	5.9444	5.48626	5.21155	5.04579	5.38198	6.43064	5.79107	6.29832	3.54105	2.62843	2.88675	2.15628	2.2008	3.73432	4.0088	4.36799	7.58736	7.32387	7.58167	7.58262	7.63919	7.32726	7.47122	7.60369	7.52551	7.47148
0.424	6.05128	6.44052	5.9503	5.49238	5.21723	5.05157	5.38833	6.43415	5.79721	6.30265	3.54364	2.62895	2.88745	2.15673	2.20197	3.7372	4.0117	4.37223	7.58797	7.32464	7.58228	7.58323	7.63978	7.32802	7.47188	7.60429	7.52616	7.47215
0.425	6.05643	6.44406	5.95616	5.49848	5.22291	5.05734	5.39466	6.43762	5.80332	6.30694	3.54622	2.62947	2.88814	2.15718	2.20314	3.74008	4.0146	4.37647	7.58857	7.32541	7.58289	7.58384	7.64036	7.32877	7.47255	7.60489	7.5268	7.47282
0.426	6.06153	6.44757	5.96198	5.50456	5.22857	5.06311	5.40099	6.44105	5.80939	6.31118	3.5488	2.62999	2.88883	2.15763	2.20431	3.74295	4.0175	4.38071	7.58917	7.32618	7.58348	7.58445	7.64093	7.32951	7.47321	7.60548	7.52744	7.47348
0.427	6.0666	6.45104	5.96776	5.51063	5.23422	5.06887	5.4073	6.44444	5.81544	6.31538	3.55139	2.63052	2.88953	2.15808	2.20548	3.74583	4.0204	4.38495	7.58977	7.32693	7.58408	7.58505	7.6415	7.33025	7.47386	7.60607	7.52807	7.47413
0.428	6.07162	6.45446	5.9735	5.51667	5.23986	5.07463	5.41359	6.4478	5.82146	6.31953	3.55397	2.63104	2.89022	2.15853	2.20665	3.7487	4.0233	4.38918	7.59036	7.32769	7.58467	7.58565	7.64207	7.33098	7.47451	7.60665	7.5287	7.47479
0.429	6.0766	6.45786	5.9792	5.5227	5.24549	5.08038	5.41988	6.45112	5.82744	6.32364	3.55656	2.63156	2.89092	2.15899	2.20782	3.75158	4.0262	4.39342	7.59094	7.32843	7.58526	7.58624	7.64263	7.33171	7.47515	7.60723	7.52932	7.47543
0.43	6.08154	6.46121	5.98486	5.52871	5.25111	5.08612	5.42614	6.4544	5.8334	6.3277	3.55914	2.63209	2.89162	2.15944	2.209	3.75445	4.0291	4.39765	7.59152	7.32917	7.58584	7.58683	7.64318	7.33243	7.47579	7.6078	7.52994	7.47607
0.431	6.08645	6.46453	5.99048	5.5347	5.25672	5.09185	5.4324	6.45764	5.83932	6.33172	3.56173	2.63262	2.89231	2.15989	2.21017	3.75733	4.032	4.40189	7.5921	7.32991	7.58642	7.58741	7.64374	7.33314	7.47642	7.60837	7.53055	7.47671
0.432	6.09131	6.46781	5.99606	5.54067	5.26232	5.09758	5.43864	6.46085	5.84521	6.33569	3.56431	2.63314	2.89301	2.16035	2.21134	3.76021	4.0349	4.40612	7.59267	7.33064	7.58699	7.58799	7.64428	7.33385	7.47705	7.60894	7.53116	7.47734
0.433	6.09613	6.47106	6.0016	5.54663	5.2679	5.1033	5.44486	6.46402	5.85107	6.33963	3.5669	2.63367	2.89371	2.1608	2.21251	3.76308	4.0378	4.41035	7.59324	7.33136	7.58756	7.58856	7.64483	7.33455	7.47767	7.6095	7.53177	7.47797
0.434	6.10091	6.47427	6.0071	5.55256	5.27348	5.10901	5.45107	6.46716	5.8569	6.34352	3.56948	2.6342	2.89441	2.16126	2.21369	3.76596	4.0407	4.41458	7.5938	7.33208	7.58812	7.58913	7.64537	7.33525	7.47828	7.61005	7.53237	7.47859
0.435	6.10565	6.47745	6.01256	5.55848	5.27904	5.11471	5.45727	6.47027	5.8627	6.34736	3.57206	2.63472	2.89511	2.16171	2.21486	3.76883	4.0436	4.41881	7.59436	7.33279	7.58868	7.58969	7.6459	7.33594	7.4789	7.6106	7.53296	7.4792
0.436	6.11035	6.48059	6.01798	5.56438	5.28459	5.12041	5.46345	6.47334	5.86846	6.35117	3.57465	2.63525	2.89581	2.16217	2.21604	3.77171	4.0465	4.42304	7.59492	7.3335	7.58923	7.59025	7.64643	7.33663	7.4795	7.61115	7.53355	7.47982
0.437	6.11502	6.4837	6.02335	5.57025	5.29013	5.1261	5.46961	6.47637	5.87419	6.35494	3.57723	2.63578	2.89651	2.16263	2.21721	3.77458	4.04939	4.42726	7.59547	7.3342	7.58978	7.59081	7.64696	7.33731	7.48011	7.6117	7.53414	7.48042
0.438	6.11964	6.48678	6.02869	5.57611	5.29566	5.13178	5.47576	6.47938	5.87989	6.35866	3.57982	2.63631	2.89721	2.16309	2.21839	3.77745	4.05229	4.43149	7.59601	7.33489	7.59033	7.59136	7.64748	7.33799	7.4807	7.61223	7.53472	7.48102
0.439	6.12422	6.48982	6.03399	5.58195	5.30118	5.13746	5.48189	6.48235	5.88555	6.36235	3.5824	2.63684	2.89791	2.16354	2.21956	3.78033	4.05519	4.43571	7.59655	7.33558	7.59087	7.59191	7.648	7.33866	7.4813	7.61277	7.53529	7.48162
0.44	6.12876	6.49284	6.03924	5.58776	5.30668	5.14312	5.48801	6.48529	5.89119	6.36599	3.58499	2.63737	2.89861	2.164	2.22074	3.7832	4.05808	4.43993	7.59709	7.33627	7.59141	7.59245	7.64852	7.33932	7.48188	7.6133	7.53587	7.48221
0.441	6.13327	6.49582	6.04446	5.59356	5.31218	5.14878	5.49411	6.4882	5.89678	6.3696	3.58757	2.6379	2.89931	2.16446	2.22192	3.78608	4.06098	4.44415	7.59762	7.33694	7.59194	7.59299	7.64903	7.33998	7.48247	7.61382	7.53643	7.4828
0.442	6.13773	6.49876	6.04963	5.59933	5.31766	5.15443	5.5002	6.49108	5.90235	6.37316	3.59015	2.63843	2.90002	2.16492	2.22309	3.78895	4.06387	4.44837	7.59815	7.33762	7.59247	7.59353	7.64953	7.34063	7.48304	7.61435	7.537	7.48338
0.443	6.14215	6.50168	6.05476	5.60509	5.32313	5.16007	5.50627	6.49392	5.90788	6.37669	3.59274	2.63897	2.90072	2.16538	2.22427	3.79182	4.06677	4.45259	7.59867	7.33829	7.59299	7.59406	7.65004	7.34128	7.48362	7.61486	7.53756	7.48396
0.444	6.14654	6.50457	6.05985	5.61082	5.32858	5.16571	5.51232	6.49674	5.91338	6.38018	3.59532	2.6395	2.90142	2.16584	2.22545	3.7947	4.06966	4.45681	7.59919	7.33895	7.59351	7.59458	7.65053	7.34193	7.48419	7.61538	7.53811	7.48453
0.445	6.15089	6.50742	6.0649	5.61654	5.33403	5.17134	5.51836	6.49953	5.91885	6.38364	3.59791	2.64003	2.90213	2.1663	2.22663	3.79757	4.07255	4.46102	7.59971	7.33961	7.59403	7.5951	7.65103	7.34257	7.48475	7.61589	7.53866	7.4851
0.446	6.15519	6.51025	6.06991	5.62223	5.33946	5.17695	5.52438	6.50229	5.92428	6.38705	3.60049	2.64056	2.90283	2.16677	2.22781	3.80044	4.07545	4.46524	7.60022	7.34026	7.59454	7.59562	7.65152	7.3432	7.48531	7.61639	7.53921	7.48566
0.447	6.15946	6.51305	6.07488	5.6279	5.34487	5.18256	5.53038	6.50502	5.92968	6.39043	3.60308	2.6411	2.90354	2.16723	2.22898	3.80332	4.07834	4.46945	7.60073	7.34091	7.59505	7.59614	7.65201	7.34383	7.48586	7.61689	7.53975	7.48622
0.448	6.16369	6.51582	6.07981	5.63355	5.35028	5.18816	5.53637	6.50772	5.93504	6.39377	3.60566	2.64163	2.90424	2.16769	2.23016	3.80619	4.08123	4.47366	7.60123	7.34155	7.59555	7.59665	7.65249	7.34445	7.48641	7.61739	7.54029	7.48678
0.449	6.16789	6.51856	6.0847	5.63918	5.35567	5.19375	5.54234	6.51039	5.94037	6.39708	3.60824	2.64217	2.90495	2.16815	2.23134	3.80906	4.08412	4.47787	7.60173	7.34219	7.59605	7.59715	7.65297	7.34507	7.48696	7.61789	7.54082	7.48733
0.45	6.17204	6.52127	6.08955	5.64478	5.36105	5.19934	5.54829	6.51303	5.94566	6.40035	3.61083	2.6427	2.90566	2.16862	2.23252	3.81194	4.08701	4.48208	7.60223	7.34282	7.59655	7.59765	7.65344	7.34568	7.4875	7.61837	7.54135	7.48787
0.451	6.17616	6.52395	6.09436	5.65037	5.36641	5.20491	5.55422	6.51565	5.95092	6.40358	3.61341	2.64324	2.90636	2.16908	2.2337	3.81481	4.08991	4.48629	7.60272	7.34344	7.59704	7.59815	7.65391	7.34629	7.48804	7.61886	7.54187	7.48841
0.452	6.18024	6.52661	6.09912	5.65593	5.37176	5.21048	5.56013	6.51824	5.95615	6.40679	3.61599	2.64378	2.90707	2.16955	2.23488	3.81768	4.0928	4.49049	7.60321	7.34407	7.59753	7.59865	7.65438	7.3469	7.48857	7.61934	7.54239	7.48895
0.453	6.18428	6.52924	6.10385	5.66147	5.3771	5.21603	5.56603	6.52081	5.96134	6.40995	3.61858	2.64431	2.90778	2.17001	2.23606	3.82055	4.09569	4.4947	7.60369	7.34468	7.59801	7.59914	7.65484	7.3475	7.4891	7.61982	7.54291	7.48948
0.454	6.18829	6.53184	6.10854	5.66698	5.38243	5.22158	5.57191	6.52335	5.9665	6.41309	3.62116	2.64485	2.90849	2.17048	2.23725	3.82342	4.09857	4.4989	7.60417	7.3453	7.5985	7.59962	7.6553	7.34809	7.48962	7.62029	7.54342	7.49001
0.455	6.19225	6.53442	6.11318	5.67248	5.38774	5.22712	5.57777	6.52586	5.97162	6.41619	3.62375	2.64539	2.9092	2.17095	2.23843	3.82629	4.10146	4.5031	7.60465	7.3459	7.59897	7.6001	7.65576	7.34868	7.49014	7.62076	7.54393	7.49054
0.456	6.19618	6.53697	6.11779	5.67795	5.39303	5.23265	5.58361	6.52834	5.97671	6.41925	3.62633	2.64593	2.90991	2.17141	2.23961	3.82917	4.10435	4.5073	7.60512	7.3465	7.59944	7.60058	7.65621	7.34926	7.49066	7.62123	7.54443	7.49106
0.457	6.20008	6.53949	6.12236	5.6834	5.39832	5.23817	5.58944	6.53081	5.98176	6.42229	3.62891	2.64647	2.91062	2.17188	2.24079	3.83204	4.10724	4.5115	7.60559	7.3471	7.59991	7.60106	7.65666	7.34984	7.49117	7.62169	7.54493	7.49157
0.458	6.20394	6.54199	6.12689	5.68882	5.40358	5.24368	5.59524	6.53324	5.98677	6.42529	3.6315	2.64701	2.91133	2.17235	2.24197	3.83491	4.11013	4.51569	7.60605	7.34769	7.60038	7.60153	7.65711	7.35042	7.49167	7.62215	7.54543	7.49208
0.459	6.20776	6.54447	6.13137	5.69422	5.40884	5.24918	5.60103	6.53566	5.99176	6.42826	3.63408	2.64754	2.91204	2.17282	2.24316	3.83778	4.11301	4.51989	7.60651	7.34828	7.60084	7.60199	7.65755	7.35099	7.49217	7.62261	7.54592	7.49259
0.46	6.21155	6.54692	6.13582	5.6996	5.41408	5.25467	5.60679	6.53804	5.9967	6.4312	3.63666	2.64809	2.91275	2.17328	2.24434	3.84065	4.1159	4.52408	7.60697	7.34887	7.6013	7.60246	7.65799	7.35155	7.49267	7.62306	7.54641	7.49309
0.461	6.2153	6.54935	6.14023	5.70495	5.4193	5.26015	5.61254	6.54041	6.00162	6.43411	3.63925	2.64863	2.91346	2.17375	2.24552	3.84352	4.11879	4.52827	7.60742	7.34944	7.60175	7.60291	7.65842	7.35211	7.49317	7.6235	7.5469	7.49359
0.462	6.21901	6.55175	6.1446	5.71028	5.42451	5.26562	5.61827	6.54275	6.00649	6.43699	3.64183	2.64917	2.91417	2.17422	2.24671	3.84639	4.12167	4.53246	7.60787	7.35002	7.6022	7.60337	7.65885	7.35267	7.49366	7.62395	7.54738	7.49408
0.463	6.22269	6.55413	6.14893	5.71559	5.42971	5.27108	5.62398	6.54507	6.01133	6.43984	3.64441	2.64971	2.91488	2.17469	2.24789	3.84926	4.12456	4.53665	7.60832	7.35059	7.60264	7.60382	7.65928	7.35322	7.49414	7.62439	7.54785	7.49457
0.464	6.22634	6.55648	6.15322	5.72087	5.43489	5.27653	5.62966	6.54736	6.01614	6.44266	3.64699	2.65025	2.9156	2.17516	2.24907	3.85213	4.12744	4.54084	7.60876	7.35115	7.60309	7.60427	7.6597	7.35377	7.49462	7.62483	7.54833	7.49506
0.465	6.22995	6.55882	6.15748	5.72613	5.44005	5.28197	5.63533	6.54964	6.02091	6.44544	3.64958	2.65079	2.91631	2.17564	2.25026	3.855	4.13032	4.54502	7.6092	7.35171	7.60353	7.60471	7.66012	7.35431	7.4951	7.62526	7.5488	7.49554
0.466	6.23353	6.56113	6.16169	5.73136	5.4452	5.2874	5.64098	6.55189	6.02565	6.4482	3.65216	2.65134	2.91702	2.17611	2.25144	3.85787	4.13321	4.54921	7.60963	7.35227	7.60396	7.60516	7.66054	7.35485	7.49557	7.62569	7.54926	7.49602
0.467	6.23707	6.56341	6.16587	5.73657	5.45034	5.29282	5.64661	6.55412	6.03035	6.45094	3.65474	2.65188	2.91774	2.17658	2.25263	3.86074	4.13609	4.55339	7.61007	7.35282	7.60439	7.60559	7.66095	7.35539	7.49604	7.62611	7.54972	7.4965
0.468	6.24058	6.56568	6.17001	5.74175	5.45546	5.29823	5.65221	6.55633	6.03501	6.45364	3.65733	2.65242	2.91845	2.17705	2.25381	3.86361	4.13897	4.55757	7.61049	7.35336	7.60482	7.60603	7.66136	7.35592	7.49651	7.62654	7.55018	7.49697
0.469	6.24406	6.56792	6.17411	5.74691	5.46056	5.30363	5.6578	6.55851	6.03965	6.45632	3.65991	2.65297	2.91917	2.17752	2.255	3.86647	4.14185	4.56175	7.61092	7.35391	7.60524	7.60646	7.66177	7.35644	7.49697	7.62696	7.55063	7.49743
0.47	6.2475	6.57015	6.17817	5.75205	5.46565	5.30901	5.66336	6.56068	6.04424	6.45896	3.66249	2.65351	2.91988	2.178	2.25619	3.86934	4.14473	4.56593	7.61134	7.35444	7.60566	7.60688	7.66217	7.35696	7.49743	7.62737	7.55109	7.49789
0.471	6.25091	6.57235	6.1822	5.75716	5.47072	5.31439	5.66891	6.56282	6.0488	6.46159	3.66507	2.65406	2.9206	2.17847	2.25737	3.87221	4.14761	4.5701	7.61176	7.35498	7.60608	7.60731	7.66257	7.35748	7.49788	7.62778	7.55153	7.49835
0.472	6.25429	6.57453	6.18619	5.76224	5.47578	5.31975	5.67443	6.56495	6.05333	6.46418	3.66766	2.6546	2.92131	2.17895	2.25856	3.87508	4.15049	4.57427	7.61217	7.35551	7.6065	7.60773	7.66297	7.35799	7.49833	7.62819	7.55198	7.49881
0.473	6.25763	6.57669	6.19014	5.7673	5.48082	5.32511	5.67993	6.56705	6.05782	6.46675	3.67024	2.65515	2.92203	2.17942	2.25975	3.87795	4.15337	4.57845	7.61258	7.35603	7.60691	7.60814	7.66336	7.3585	7.49877	7.6286	7.55241	7.49926
0.474	6.26094	6.57883	6.19405	5.77233	5.48584	5.33045	5.68541	6.56914	6.06227	6.46929	3.67282	2.6557	2.92274	2.1799	2.26093	3.88081	4.15625	4.58262	7.61299	7.35655	7.60731	7.60855	7.66375	7.359	7.49922	7.629	7.55285	7.4997
0.475	6.26423	6.58095	6.19793	5.77734	5.49085	5.33578	5.69087	6.5712	6.06669	6.47181	3.6754	2.65624	2.92346	2.18037	2.26212	3.88368	4.15913	4.58678	7.61339	7.35707	7.60772	7.60896	7.66413	7.3595	7.49965	7.6294	7.55328	7.50015
0.476	6.26747	6.58305	6.20177	5.78232	5.49584	5.3411	5.6963	6.57325	6.07108	6.4743	3.67798	2.65679	2.92418	2.18085	2.26331	3.88655	4.16201	4.59095	7.61379	7.35758	7.60812	7.60937	7.66452	7.36	7.50009	7.62979	7.55371	7.50059
0.477	6.27069	6.58513	6.20558	5.78728	5.50082	5.34641	5.70172	6.57527	6.07543	6.47676	3.68057	2.65734	2.9249	2.18132	2.2645	3.88942	4.16488	4.59512	7.61418	7.35809	7.60851	7.60977	7.6649	7.36049	7.50052	7.63018	7.55414	7.50102
0.478	6.27388	6.58719	6.20935	5.79221	5.50578	5.35171	5.70711	6.57728	6.07974	6.47921	3.68315	2.65788	2.92562	2.1818	2.26568	3.89228	4.16776	4.59928	7.61458	7.35859	7.6089	7.61017	7.66527	7.36098	7.50094	7.63057	7.55456	7.50145
0.479	6.27704	6.58923	6.21309	5.79711	5.51072	5.357	5.71248	6.57927	6.08403	6.48162	3.68573	2.65843	2.92633	2.18228	2.26687	3.89515	4.17064	4.60344	7.61497	7.35909	7.60929	7.61056	7.66565	7.36146	7.50137	7.63095	7.55498	7.50188
0.48	6.28016	6.59125	6.21679	5.80199	5.51564	5.36227	5.71783	6.58124	6.08827	6.48402	3.68831	2.65898	2.92705	2.18276	2.26806	3.89801	4.17351	4.6076	7.61535	7.35958	7.60968	7.61096	7.66602	7.36194	7.50179	7.63134	7.55539	7.50231
0.481	6.28326	6.59326	6.22045	5.80684	5.52055	5.36753	5.72315	6.58319	6.09248	6.48639	3.69089	2.65953	2.92777	2.18323	2.26925	3.90088	4.17639	4.61175	7.61574	7.36008	7.61006	7.61135	7.66638	7.36241	7.5022	7.63171	7.5558	7.50273
0.482	6.28633	6.59524	6.22408	5.81167	5.52544	5.37278	5.72845	6.58512	6.09666	6.48873	3.69347	2.66008	2.92849	2.18371	2.27044	3.90375	4.17926	4.61591	7.61611	7.36056	7.61044	7.61173	7.66675	7.36288	7.50261	7.63209	7.55621	7.50314
0.483	6.28936	6.59721	6.22768	5.81647	5.53031	5.37802	5.73373	6.58704	6.1008	6.49106	3.69606	2.66063	2.92921	2.18419	2.27163	3.90661	4.18213	4.62006	7.61649	7.36104	7.61082	7.61211	7.66711	7.36335	7.50302	7.63246	7.55662	7.50356
0.484	6.29237	6.59916	6.23124	5.82124	5.53517	5.38324	5.73899	6.58894	6.10491	6.49336	3.69864	2.66118	2.92993	2.18467	2.27282	3.90948	4.18501	4.62421	7.61686	7.36152	7.61119	7.61249	7.66746	7.36381	7.50343	7.63283	7.55702	7.50397
0.485	6.29535	6.60109	6.23477	5.82599	5.54001	5.38845	5.74422	6.59082	6.10899	6.49563	3.70122	2.66173	2.93065	2.18515	2.27401	3.91234	4.18788	4.62836	7.61723	7.362	7.61156	7.61287	7.66782	7.36427	7.50383	7.63319	7.55741	7.50437
0.486	6.2983	6.60301	6.23826	5.83071	5.54483	5.39365	5.74943	6.59269	6.11303	6.49789	3.7038	2.66228	2.93137	2.18563	2.2752	3.91521	4.19075	4.63251	7.6176	7.36247	7.61193	7.61324	7.66817	7.36473	7.50422	7.63356	7.55781	7.50477
0.487	6.30122	6.60491	6.24172	5.8354	5.54963	5.39884	5.75461	6.59453	6.11704	6.50012	3.70638	2.66283	2.9321	2.18611	2.27639	3.91807	4.19362	4.63666	7.61796	7.36294	7.61229	7.61361	7.66852	7.36518	7.50462	7.63392	7.5582	7.50517
0.488	6.30411	6.60679	6.24515	5.84006	5.55442	5.40402	5.75978	6.59637	6.12101	6.50233	3.70896	2.66339	2.93282	2.18659	2.27758	3.92093	4.19649	4.6408	7.61832	7.3634	7.61265	7.61398	7.66886	7.36563	7.50501	7.63427	7.55859	7.50557
0.489	6.30698	6.60865	6.24854	5.8447	5.55918	5.40918	5.76492	6.59818	6.12495	6.50453	3.71154	2.66394	2.93354	2.18708	2.27877	3.9238	4.19936	4.64494	7.61868	7.36386	7.61301	7.61434	7.6692	7.36607	7.50539	7.63462	7.55897	7.50596
0.49	6.30982	6.6105	6.2519	5.84931	5.56393	5.41433	5.77003	6.59998	6.12886	6.50669	3.71412	2.66449	2.93426	2.18756	2.27996	3.92666	4.20223	4.64908	7.61903	7.36431	7.61337	7.6147	7.66954	7.36651	7.50578	7.63497	7.55935	7.50635
0.491	6.31263	6.61233	6.25523	5.8539	5.56866	5.41946	5.77512	6.60176	6.13273	6.50884	3.7167	2.66504	2.93498	2.18804	2.28115	3.92952	4.2051	4.65322	7.61939	7.36476	7.61372	7.61506	7.66988	7.36695	7.50616	7.63532	7.55973	7.50674
0.492	6.31541	6.61415	6.25853	5.85846	5.57338	5.42458	5.78019	6.60353	6.13657	6.51097	3.71928	2.6656	2.93571	2.18852	2.28234	3.93239	4.20796	4.65735	7.61973	7.36521	7.61406	7.61541	7.67021	7.36738	7.50653	7.63566	7.5601	7.50712
0.493	6.31817	6.61594	6.2618	5.86299	5.57807	5.42969	5.78523	6.60528	6.14037	6.51308	3.72186	2.66615	2.93643	2.189	2.28354	3.93525	4.21083	4.66148	7.62008	7.36566	7.61441	7.61576	7.67054	7.36781	7.50691	7.636	7.56048	7.50749
0.494	6.3209	6.61773	6.26503	5.86749	5.58275	5.43479	5.79025	6.60702	6.14415	6.51517	3.72444	2.66671	2.93715	2.18949	2.28473	3.93811	4.2137	4.66562	7.62042	7.3661	7.61475	7.61611	7.67087	7.36823	7.50728	7.63634	7.56084	7.50787
0.495	6.32361	6.6195	6.26824	5.87196	5.5874	5.43987	5.79524	6.60874	6.14789	6.51724	3.72702	2.66726	2.93788	2.18997	2.28592	3.94097	4.21656	4.66974	7.62076	7.36653	7.61509	7.61645	7.67119	7.36865	7.50764	7.63668	7.56121	7.50824
0.496	6.32629	6.62125	6.27141	5.87641	5.59204	5.44494	5.80021	6.61044	6.1516	6.51928	3.7296	2.66782	2.9386	2.19046	2.28711	3.94384	4.21943	4.67387	7.62109	7.36696	7.61542	7.61679	7.67151	7.36907	7.508	7.63701	7.56157	7.50861
0.497	6.32894	6.62298	6.27455	5.88083	5.59666	5.44999	5.80515	6.61213	6.15527	6.52131	3.73218	2.66837	2.93933	2.19094	2.2883	3.9467	4.22229	4.67799	7.62142	7.36739	7.61576	7.61713	7.67183	7.36948	7.50836	7.63733	7.56193	7.50897
0.498	6.33157	6.62471	6.27767	5.88523	5.60126	5.45503	5.81007	6.61381	6.15892	6.52332	3.73476	2.66893	2.94005	2.19143	2.2895	3.94956	4.22515	4.68212	7.62175	7.36782	7.61609	7.61747	7.67214	7.36989	7.50872	7.63766	7.56229	7.50934
0.499	6.33418	6.62641	6.28075	5.88959	5.60584	5.46006	5.81496	6.61547	6.16253	6.52532	3.73734	2.66948	2.94078	2.19191	2.29069	3.95242	4.22802	4.68624	7.62208	7.36824	7.61641	7.6178	7.67246	7.3703	7.50907	7.63798	7.56264	7.50969
0.5	6.33676	6.62811	6.2838	5.89393	5.61041	5.46507	5.81983	6.61712	6.16611	6.52729	3.73992	2.67004	2.9415	2.1924	2.29188	3.95528	4.23088	4.69035	7.6224	7.36866	7.61674	7.61813	7.67277	7.3707	7.50942	7.6383	7.56299	7.51005
0.501	6.33931	6.62978	6.28683	5.89824	5.61495	5.47007	5.82467	6.61875	6.16966	6.52924	3.7425	2.67059	2.94223	2.19288	2.29308	3.95814	4.23374	4.69447	7.62272	7.36907	7.61706	7.61845	7.67307	7.3711	7.50977	7.63862	7.56333	7.5104
0.502	6.34184	6.63145	6.28982	5.90253	5.61947	5.47505	5.82949	6.62037	6.17317	6.53118	3.74508	2.67115	2.94296	2.19337	2.29427	3.961	4.2366	4.69858	7.62304	7.36948	7.61737	7.61878	7.67338	7.3715	7.51011	7.63893	7.56368	7.51075
0.503	6.34435	6.6331	6.29279	5.90678	5.62398	5.48002	5.83428	6.62197	6.17666	6.5331	3.74766	2.67171	2.94368	2.19386	2.29546	3.96386	4.23946	4.70269	7.62336	7.36989	7.61769	7.6191	7.67368	7.37189	7.51045	7.63924	7.56402	7.51109
0.504	6.34683	6.63473	6.29572	5.91101	5.62846	5.48498	5.83905	6.62356	6.18011	6.535	3.75024	2.67227	2.94441	2.19434	2.29666	3.96672	4.24232	4.7068	7.62367	7.37029	7.618	7.61941	7.67397	7.37228	7.51079	7.63955	7.56435	7.51144
0.505	6.34929	6.63635	6.29863	5.91521	5.63293	5.48992	5.84379	6.62514	6.18353	6.53689	3.75282	2.67282	2.94514	2.19483	2.29785	3.96958	4.24518	4.71091	7.62398	7.37069	7.61831	7.61973	7.67427	7.37266	7.51112	7.63985	7.56469	7.51178
0.506	6.35173	6.63796	6.30152	5.91938	5.63738	5.49484	5.84851	6.6267	6.18693	6.53875	3.7554	2.67338	2.94587	2.19532	2.29905	3.97244	4.24804	4.71501	7.62428	7.37109	7.61861	7.62004	7.67456	7.37304	7.51145	7.64016	7.56502	7.51211
0.507	6.35414	6.63955	6.30437	5.92353	5.6418	5.49975	5.8532	6.62825	6.19029	6.5406	3.75797	2.67394	2.94659	2.19581	2.30024	3.9753	4.2509	4.71911	7.62458	7.37148	7.61892	7.62035	7.67485	7.37342	7.51178	7.64046	7.56535	7.51244
0.508	6.35653	6.64114	6.3072	5.92765	5.64621	5.50465	5.85786	6.62979	6.19362	6.54244	3.76055	2.6745	2.94732	2.19629	2.30144	3.97816	4.25375	4.72321	7.62488	7.37187	7.61922	7.62066	7.67514	7.3738	7.5121	7.64075	7.56567	7.51277
0.509	6.3589	6.6427	6.31	5.93174	5.6506	5.50953	5.8625	6.63132	6.19692	6.54425	3.76313	2.67506	2.94805	2.19678	2.30263	3.98101	4.25661	4.72731	7.62518	7.37225	7.61952	7.62096	7.67542	7.37417	7.51242	7.64105	7.566	7.5131
0.51	6.36125	6.64426	6.31277	5.9358	5.65496	5.51439	5.86711	6.63283	6.20019	6.54605	3.76571	2.67562	2.94878	2.19727	2.30383	3.98387	4.25946	4.7314	7.62548	7.37264	7.61981	7.62126	7.6757	7.37454	7.51274	7.64134	7.56631	7.51342
0.511	6.36358	6.6458	6.31552	5.93983	5.65931	5.51924	5.8717	6.63433	6.20343	6.54784	3.76829	2.67618	2.94951	2.19776	2.30502	3.98673	4.26232	4.73549	7.62577	7.37301	7.6201	7.62156	7.67598	7.3749	7.51305	7.64163	7.56663	7.51374
0.512	6.36588	6.64733	6.31824	5.94384	5.66364	5.52408	5.87626	6.63581	6.20664	6.5496	3.77086	2.67674	2.95024	2.19825	2.30622	3.98959	4.26517	4.73958	7.62606	7.37339	7.62039	7.62185	7.67626	7.37526	7.51336	7.64191	7.56694	7.51406
0.513	6.36816	6.64884	6.32093	5.94782	5.66794	5.52889	5.88079	6.63729	6.20983	6.55136	3.77344	2.6773	2.95097	2.19874	2.30741	3.99244	4.26802	4.74367	7.62634	7.37376	7.62068	7.62214	7.67653	7.37562	7.51367	7.64219	7.56726	7.51437
0.514	6.37043	6.65035	6.3236	5.95177	5.67223	5.5337	5.8853	6.63875	6.21298	6.55309	3.77602	2.67786	2.9517	2.19923	2.30861	3.9953	4.27088	4.74775	7.62662	7.37413	7.62096	7.62243	7.6768	7.37598	7.51398	7.64247	7.56756	7.51468
0.515	6.37267	6.65184	6.32624	5.9557	5.67649	5.53848	5.88978	6.6402	6.21611	6.55481	3.7786	2.67842	2.95243	2.19972	2.30981	3.99816	4.27373	4.75183	7.62691	7.3745	7.62124	7.62272	7.67707	7.37633	7.51428	7.64275	7.56787	7.51499
0.516	6.37489	6.65331	6.32886	5.95959	5.68074	5.54325	5.89424	6.64164	6.2192	6.55652	3.78117	2.67898	2.95316	2.20022	2.311	4.00101	4.27658	4.75591	7.62718	7.37486	7.62152	7.623	7.67734	7.37668	7.51458	7.64302	7.56817	7.5153
0.517	6.37709	6.65478	6.33146	5.96346	5.68496	5.54801	5.89867	6.64306	6.22227	6.55821	3.78375	2.67955	2.95389	2.20071	2.3122	4.00387	4.27943	4.75999	7.62746	7.37522	7.62179	7.62328	7.6776	7.37702	7.51488	7.6433	7.56847	7.5156
0.518	6.37927	6.65624	6.33403	5.9673	5.68917	5.55275	5.90307	6.64447	6.22531	6.55989	3.78633	2.68011	2.95462	2.2012	2.3134	4.00672	4.28228	4.76406	7.62773	7.37557	7.62207	7.62356	7.67786	7.37736	7.51517	7.64357	7.56877	7.5159
0.519	6.38143	6.65768	6.33657	5.97112	5.69335	5.55747	5.90744	6.64588	6.22832	6.56155	3.7889	2.68067	2.95535	2.20169	2.31459	4.00958	4.28512	4.76813	7.628	7.37593	7.62234	7.62384	7.67812	7.3777	7.51546	7.64383	7.56906	7.51619
0.52	6.38357	6.65911	6.33909	5.97491	5.69751	5.56218	5.91179	6.64727	6.2313	6.56319	3.79148	2.68123	2.95608	2.20218	2.31579	4.01243	4.28797	4.7722	7.62827	7.37627	7.6226	7.62411	7.67837	7.37804	7.51575	7.6441	7.56935	7.51649
0.521	6.38569	6.66053	6.34159	5.97867	5.70165	5.56687	5.91611	6.64865	6.23426	6.56483	3.79406	2.6818	2.95681	2.20268	2.31699	4.01529	4.29082	4.77626	7.62853	7.37662	7.62287	7.62438	7.67862	7.37837	7.51603	7.64436	7.56964	7.51678
0.522	6.38779	6.66194	6.34407	5.9824	5.70577	5.57154	5.92041	6.65001	6.23719	6.56644	3.79663	2.68236	2.95755	2.20317	2.31818	4.01814	4.29366	4.78033	7.62879	7.37696	7.62313	7.62465	7.67887	7.3787	7.51631	7.64462	7.56992	7.51707
0.523	6.38987	6.66333	6.34652	5.9861	5.70987	5.57619	5.92468	6.65137	6.24009	6.56805	3.79921	2.68292	2.95828	2.20366	2.31938	4.02099	4.29651	4.78439	7.62905	7.3773	7.62339	7.62491	7.67912	7.37902	7.51659	7.64487	7.57021	7.51735
0.524	6.39194	6.66472	6.34895	5.98978	5.71395	5.58083	5.92892	6.65271	6.24297	6.56964	3.80179	2.68349	2.95901	2.20416	2.32058	4.02385	4.29935	4.78844	7.62931	7.37764	7.62365	7.62518	7.67937	7.37934	7.51687	7.64512	7.57049	7.51763
0.525	6.39398	6.66609	6.35135	5.99343	5.71801	5.58546	5.93314	6.65405	6.24582	6.57121	3.80436	2.68405	2.95974	2.20465	2.32178	4.0267	4.3022	4.7925	7.62956	7.37797	7.6239	7.62544	7.67961	7.37966	7.51714	7.64538	7.57076	7.51791
0.526	6.39601	6.66745	6.35374	5.99706	5.72205	5.59006	5.93733	6.65537	6.24864	6.57278	3.80694	2.68462	2.96048	2.20515	2.32298	4.02955	4.30504	4.79655	7.62981	7.3783	7.62415	7.62569	7.67985	7.37998	7.51741	7.64562	7.57104	7.51819
0.527	6.39802	6.6688	6.3561	6.00065	5.72606	5.59465	5.94149	6.65669	6.25143	6.57433	3.80951	2.68518	2.96121	2.20564	2.32417	4.0324	4.30788	4.8006	7.63006	7.37863	7.6244	7.62595	7.68009	7.38029	7.51768	7.64587	7.57131	7.51846
0.528	6.40001	6.67014	6.35844	6.00422	5.73006	5.59922	5.94562	6.65799	6.2542	6.57586	3.81209	2.68575	2.96194	2.20614	2.32537	4.03525	4.31072	4.80465	7.63031	7.37895	7.62465	7.6262	7.68032	7.3806	7.51794	7.64611	7.57158	7.51873
0.529	6.40198	6.67147	6.36076	6.00777	5.73403	5.60378	5.94973	6.65928	6.25695	6.57738	3.81466	2.68631	2.96268	2.20663	2.32657	4.03811	4.31356	4.80869	7.63055	7.37927	7.62489	7.62645	7.68055	7.38091	7.5182	7.64635	7.57185	7.519
0.53	6.40394	6.67279	6.36305	6.01128	5.73798	5.60831	5.95381	6.66056	6.25967	6.57889	3.81724	2.68688	2.96341	2.20713	2.32777	4.04096	4.3164	4.81273	7.63079	7.37959	7.62513	7.6267	7.68078	7.38122	7.51846	7.64659	7.57211	7.51926
0.531	6.40588	6.6741	6.36533	6.01477	5.74191	5.61283	5.95787	6.66183	6.26236	6.58039	3.81981	2.68745	2.96415	2.20762	2.32897	4.04381	4.31924	4.81677	7.63103	7.3799	7.62537	7.62694	7.68101	7.38152	7.51872	7.64683	7.57237	7.51952
0.532	6.4078	6.6754	6.36758	6.01824	5.74582	5.61734	5.96189	6.66309	6.26503	6.58188	3.82239	2.68801	2.96488	2.20812	2.33017	4.04666	4.32208	4.8208	7.63127	7.38022	7.62561	7.62718	7.68124	7.38182	7.51897	7.64706	7.57263	7.51978
0.533	6.40971	6.67669	6.36982	6.02167	5.74971	5.62182	5.9659	6.66434	6.26768	6.58335	3.82496	2.68858	2.96562	2.20862	2.33137	4.04951	4.32491	4.82483	7.6315	7.38052	7.62584	7.62742	7.68146	7.38211	7.51922	7.64729	7.57289	7.52004
0.534	6.41159	6.67797	6.37203	6.02508	5.75357	5.62629	5.96987	6.66558	6.2703	6.58481	3.82754	2.68915	2.96635	2.20911	2.33257	4.05236	4.32775	4.82886	7.63173	7.38083	7.62607	7.62766	7.68168	7.3824	7.51947	7.64752	7.57314	7.52029
0.535	6.41347	6.67924	6.37423	6.02847	5.75742	5.63074	5.97382	6.66681	6.27289	6.58625	3.83011	2.68971	2.96709	2.20961	2.33377	4.05521	4.33058	4.83288	7.63196	7.38113	7.6263	7.62789	7.6819	7.38269	7.51971	7.64775	7.57339	7.52055
0.536	6.41532	6.68049	6.3764	6.03183	5.76124	5.63517	5.97774	6.66803	6.27546	6.58769	3.83268	2.69028	2.96782	2.21011	2.33497	4.05805	4.33342	4.83691	7.63219	7.38143	7.62653	7.62812	7.68211	7.38298	7.51996	7.64797	7.57364	7.52079
0.537	6.41716	6.68174	6.37855	6.03516	5.76504	5.63958	5.98163	6.66925	6.27801	6.58911	3.83526	2.69085	2.96856	2.21061	2.33616	4.0609	4.33625	4.84092	7.63241	7.38173	7.62675	7.62835	7.68233	7.38326	7.52019	7.64819	7.57389	7.52104
0.538	6.41898	6.68298	6.38069	6.03846	5.76882	5.64397	5.9855	6.67045	6.28053	6.59052	3.83783	2.69142	2.96929	2.2111	2.33736	4.06375	4.33908	4.84494	7.63263	7.38202	7.62697	7.62858	7.68254	7.38354	7.52043	7.64841	7.57413	7.52128
0.539	6.42079	6.68421	6.3828	6.04174	5.77258	5.64835	5.98934	6.67164	6.28304	6.59192	3.84041	2.69198	2.97003	2.2116	2.33856	4.0666	4.34191	4.84895	7.63285	7.38231	7.62719	7.62881	7.68275	7.38382	7.52067	7.64862	7.57437	7.52152
0.54	6.42258	6.68543	6.3849	6.045	5.77632	5.65271	5.99315	6.67282	6.28551	6.59331	3.84298	2.69255	2.97077	2.2121	2.33976	4.06945	4.34474	4.85296	7.63307	7.3826	7.62741	7.62903	7.68295	7.3841	7.5209	7.64884	7.57461	7.52176
0.541	6.42436	6.68664	6.38698	6.04823	5.78003	5.65705	5.99694	6.67399	6.28797	6.59468	3.84555	2.69312	2.9715	2.2126	2.34097	4.07229	4.34757	4.85697	7.63328	7.38289	7.62762	7.62925	7.68316	7.38437	7.52113	7.64905	7.57485	7.522
0.542	6.42612	6.68784	6.38904	6.05143	5.78373	5.66137	6.0007	6.67516	6.2904	6.59605	3.84813	2.69369	2.97224	2.2131	2.34217	4.07514	4.3504	4.86097	7.63349	7.38317	7.62783	7.62947	7.68336	7.38464	7.52135	7.64926	7.57508	7.52223
0.543	6.42787	6.68903	6.39108	6.05461	5.7874	5.66567	6.00444	6.67631	6.29281	6.5974	3.8507	2.69426	2.97298	2.2136	2.34337	4.07798	4.35323	4.86497	7.6337	7.38345	7.62804	7.62968	7.68356	7.3849	7.52158	7.64947	7.57531	7.52246
0.544	6.4296	6.69021	6.3931	6.05776	5.79105	5.66996	6.00814	6.67746	6.2952	6.59874	3.85327	2.69483	2.97371	2.2141	2.34457	4.08083	4.35606	4.86897	7.63391	7.38372	7.62825	7.62989	7.68375	7.38517	7.5218	7.64967	7.57554	7.52269
0.545	6.43131	6.69138	6.39511	6.06089	5.79468	5.67422	6.01182	6.67859	6.29756	6.60007	3.85584	2.6954	2.97445	2.2146	2.34577	4.08368	4.35888	4.87296	7.63411	7.384	7.62845	7.6301	7.68395	7.38543	7.52202	7.64987	7.57577	7.52291
0.546	6.43302	6.69254	6.3971	6.06399	5.79828	5.67847	6.01548	6.67972	6.29991	6.60139	3.85841	2.69597	2.97519	2.2151	2.34697	4.08652	4.36171	4.87695	7.63431	7.38427	7.62866	7.63031	7.68414	7.38569	7.52223	7.65007	7.57599	7.52313
0.547	6.4347	6.6937	6.39907	6.06707	5.80187	5.6827	6.01911	6.68084	6.30223	6.6027	3.86099	2.69654	2.97593	2.2156	2.34817	4.08936	4.36453	4.88094	7.63451	7.38454	7.62886	7.63052	7.68433	7.38594	7.52245	7.65027	7.57621	7.52335
0.548	6.43638	6.69484	6.40102	6.07012	5.80543	5.6869	6.02271	6.68195	6.30453	6.604	3.86356	2.69711	2.97667	2.2161	2.34937	4.09221	4.36735	4.88492	7.63471	7.3848	7.62905	7.63072	7.68452	7.38619	7.52266	7.65046	7.57643	7.52357
0.549	6.43804	6.69598	6.40295	6.07314	5.80897	5.69109	6.02629	6.68305	6.30681	6.60529	3.86613	2.69768	2.97741	2.2166	2.35057	4.09505	4.37018	4.8889	7.63491	7.38506	7.62925	7.63092	7.68471	7.38644	7.52287	7.65066	7.57665	7.52379
0.55	6.43968	6.69711	6.40487	6.07615	5.81249	5.69527	6.02984	6.68414	6.30907	6.60656	3.8687	2.69825	2.97814	2.2171	2.35177	4.0979	4.373	4.89288	7.6351	7.38532	7.62944	7.63112	7.68489	7.38669	7.52307	7.65085	7.57686	7.524
0.551	6.44131	6.69822	6.40677	6.07913	5.81599	5.69942	6.03336	6.68523	6.31131	6.60783	3.87127	2.69882	2.97888	2.2176	2.35298	4.10074	4.37582	4.89685	7.63529	7.38558	7.62963	7.63132	7.68507	7.38694	7.52328	7.65104	7.57707	7.52421
0.552	6.44293	6.69933	6.40866	6.08208	5.81947	5.70355	6.03686	6.6863	6.31352	6.60909	3.87384	2.6994	2.97962	2.21811	2.35418	4.10358	4.37864	4.90082	7.63548	7.38584	7.62982	7.63151	7.68525	7.38718	7.52348	7.65122	7.57728	7.52442
0.553	6.44453	6.70044	6.41053	6.08501	5.82292	5.70766	6.04033	6.68737	6.31572	6.61033	3.87641	2.69997	2.98036	2.21861	2.35538	4.10642	4.38145	4.90478	7.63567	7.38609	7.63001	7.63171	7.68543	7.38742	7.52368	7.65141	7.57749	7.52462
0.554	6.44613	6.70153	6.41238	6.08791	5.82636	5.71176	6.04377	6.68843	6.3179	6.61157	3.87899	2.70054	2.9811	2.21911	2.35658	4.10926	4.38427	4.90875	7.63585	7.38634	7.63019	7.6319	7.6856	7.38765	7.52387	7.65159	7.5777	7.52482
0.555	6.4477	6.70261	6.41422	6.0908	5.82977	5.71583	6.04719	6.68948	6.32006	6.6128	3.88156	2.70111	2.98184	2.21961	2.35778	4.1121	4.38709	4.9127	7.63603	7.38658	7.63037	7.63208	7.68577	7.38789	7.52407	7.65177	7.5779	7.52502
0.556	6.44927	6.70369	6.41604	6.09365	5.83316	5.71989	6.05059	6.69052	6.3222	6.61401	3.88413	2.70168	2.98258	2.22012	2.35899	4.11495	4.3899	4.91666	7.63621	7.38683	7.63055	7.63227	7.68594	7.38812	7.52426	7.65194	7.5781	7.52522
0.557	6.45082	6.70476	6.41785	6.09649	5.83652	5.72392	6.05396	6.69156	6.32431	6.61522	3.8867	2.70226	2.98332	2.22062	2.36019	4.11779	4.39272	4.92061	7.63639	7.38707	7.63073	7.63245	7.68611	7.38835	7.52445	7.65212	7.5783	7.52542
0.558	6.45236	6.70582	6.41964	6.0993	5.83987	5.72794	6.0573	6.69258	6.32641	6.61641	3.88927	2.70283	2.98406	2.22112	2.36139	4.12063	4.39553	4.92456	7.63656	7.38731	7.63091	7.63263	7.68628	7.38857	7.52463	7.65229	7.57849	7.52561
0.559	6.45388	6.70687	6.42141	6.10209	5.8432	5.73193	6.06062	6.6936	6.32849	6.6176	3.89184	2.7034	2.9848	2.22163	2.36259	4.12346	4.39834	4.9285	7.63674	7.38754	7.63108	7.63281	7.68644	7.3888	7.52482	7.65246	7.57869	7.5258
0.56	6.4554	6.70792	6.42317	6.10485	5.8465	5.73591	6.06391	6.69461	6.33056	6.61878	3.8944	2.70398	2.98554	2.22213	2.3638	4.1263	4.40115	4.93244	7.63691	7.38777	7.63125	7.63299	7.68661	7.38902	7.525	7.65263	7.57888	7.52599
0.561	6.4569	6.70895	6.42492	6.10759	5.84978	5.73987	6.06718	6.69562	6.3326	6.61994	3.89697	2.70455	2.98628	2.22264	2.365	4.12914	4.40396	4.93638	7.63707	7.388	7.63142	7.63316	7.68677	7.38924	7.52518	7.6528	7.57907	7.52617
0.562	6.45839	6.70998	6.42665	6.11031	5.85304	5.7438	6.07042	6.69661	6.33462	6.6211	3.89954	2.70513	2.98703	2.22314	2.3662	4.13198	4.40677	4.94031	7.63724	7.38823	7.63158	7.63333	7.68692	7.38945	7.52535	7.65296	7.57925	7.52636
0.563	6.45986	6.711	6.42836	6.11301	5.85628	5.74772	6.07363	6.6976	6.33663	6.62225	3.90211	2.7057	2.98777	2.22365	2.3674	4.13482	4.40958	4.94424	7.63741	7.38846	7.63175	7.6335	7.68708	7.38966	7.52553	7.65313	7.57944	7.52654
0.564	6.46133	6.71201	6.43006	6.11568	5.8595	5.75162	6.07683	6.69858	6.33862	6.62339	3.90468	2.70627	2.98851	2.22415	2.36861	4.13765	4.41239	4.94816	7.63757	7.38868	7.63191	7.63367	7.68723	7.38988	7.5257	7.65329	7.57962	7.52672
0.565	6.46278	6.71302	6.43175	6.11833	5.86269	5.75549	6.07999	6.69955	6.34059	6.62452	3.90725	2.70685	2.98925	2.22466	2.36981	4.14049	4.41519	4.95209	7.63773	7.3889	7.63207	7.63384	7.68738	7.39008	7.52587	7.65344	7.5798	7.52689
0.566	6.46422	6.71402	6.43342	6.12096	5.86587	5.75935	6.08314	6.70052	6.34254	6.62564	3.90982	2.70742	2.98999	2.22516	2.37101	4.14333	4.418	4.956	7.63788	7.38912	7.63223	7.634	7.68753	7.39029	7.52604	7.6536	7.57998	7.52707
0.567	6.46565	6.71501	6.43508	6.12357	5.86902	5.76319	6.08625	6.70147	6.34448	6.62676	3.91238	2.708	2.99073	2.22567	2.37222	4.14616	4.4208	4.95992	7.63804	7.38933	7.63238	7.63416	7.68768	7.39049	7.5262	7.65375	7.58015	7.52724
0.568	6.46707	6.71599	6.43673	6.12615	5.87215	5.76701	6.08935	6.70242	6.34639	6.62786	3.91495	2.70857	2.99148	2.22617	2.37342	4.149	4.42361	4.96382	7.63819	7.38955	7.63254	7.63432	7.68783	7.39069	7.52637	7.65391	7.58033	7.52741
0.569	6.46848	6.71696	6.43836	6.12871	5.87526	5.7708	6.09242	6.70337	6.3483	6.62896	3.91752	2.70915	2.99222	2.22668	2.37462	4.15183	4.42641	4.96773	7.63835	7.38976	7.63269	7.63448	7.68797	7.39089	7.52653	7.65405	7.5805	7.52758
0.57	6.46987	6.71793	6.43997	6.13126	5.87835	5.77458	6.09546	6.7043	6.35018	6.63004	3.92009	2.70973	2.99296	2.22719	2.37583	4.15467	4.42921	4.97163	7.6385	7.38997	7.63284	7.63464	7.68811	7.39109	7.52669	7.6542	7.58067	7.52774
0.571	6.47126	6.71889	6.44158	6.13378	5.88142	5.77834	6.09848	6.70523	6.35205	6.63112	3.92265	2.7103	2.9937	2.22769	2.37703	4.1575	4.43201	4.97553	7.63864	7.39017	7.63299	7.63479	7.68825	7.39128	7.52684	7.65435	7.58084	7.5279
0.572	6.47263	6.71985	6.44317	6.13627	5.88446	5.78207	6.10148	6.70615	6.3539	6.63219	3.92522	2.71088	2.99445	2.2282	2.37824	4.16033	4.43481	4.97942	7.63879	7.39037	7.63313	7.63494	7.68839	7.39147	7.527	7.65449	7.581	7.52806
0.573	6.47399	6.72079	6.44475	6.13875	5.88749	5.78579	6.10445	6.70706	6.35573	6.63325	3.92779	2.71145	2.99519	2.22871	2.37944	4.16317	4.4376	4.98331	7.63893	7.39057	7.63328	7.63509	7.68852	7.39166	7.52715	7.65463	7.58117	7.52822
0.574	6.47534	6.72173	6.44631	6.14121	5.89049	5.78948	6.1074	6.70797	6.35755	6.6343	3.93035	2.71203	2.99593	2.22921	2.38064	4.166	4.4404	4.98719	7.63907	7.39077	7.63342	7.63524	7.68866	7.39185	7.5273	7.65477	7.58133	7.52838
0.575	6.47668	6.72266	6.44787	6.14364	5.89348	5.79316	6.11032	6.70887	6.35935	6.63535	3.93292	2.71261	2.99668	2.22972	2.38185	4.16883	4.44319	4.99107	7.63921	7.39097	7.63356	7.63538	7.68879	7.39203	7.52744	7.65491	7.58148	7.52853
0.576	6.47801	6.72359	6.44941	6.14606	5.89644	5.79681	6.11322	6.70976	6.36114	6.63638	3.93549	2.71319	2.99742	2.23023	2.38305	4.17166	4.44599	4.99495	7.63935	7.39116	7.63369	7.63553	7.68892	7.39221	7.52759	7.65505	7.58164	7.52869
0.577	6.47933	6.72451	6.45093	6.14845	5.89938	5.80045	6.1161	6.71065	6.36291	6.63741	3.93805	2.71376	2.99817	2.23074	2.38426	4.17449	4.44878	4.99882	7.63948	7.39135	7.63383	7.63567	7.68905	7.39239	7.52773	7.65518	7.5818	7.52883
0.578	6.48064	6.72542	6.45245	6.15082	5.9023	5.80406	6.11896	6.71153	6.36466	6.63843	3.94062	2.71434	2.99891	2.23125	2.38546	4.17732	4.45157	5.00269	7.63962	7.39154	7.63396	7.63581	7.68917	7.39257	7.52787	7.65531	7.58195	7.52898
0.579	6.48194	6.72632	6.45395	6.15318	5.9052	5.80766	6.12179	6.7124	6.3664	6.63944	3.94318	2.71492	2.99965	2.23175	2.38667	4.18015	4.45436	5.00655	7.63975	7.39173	7.63409	7.63594	7.6893	7.39274	7.52801	7.65544	7.5821	7.52913
0.58	6.48323	6.72722	6.45544	6.15551	5.90808	5.81123	6.1246	6.71327	6.36813	6.64044	3.94575	2.7155	3.0004	2.23226	2.38787	4.18298	4.45715	5.01041	7.63988	7.39191	7.63422	7.63608	7.68942	7.39292	7.52815	7.65557	7.58225	7.52927
0.581	6.48451	6.72811	6.45692	6.15783	5.91094	5.81478	6.12738	6.71413	6.36984	6.64144	3.94831	2.71607	3.00114	2.23277	2.38908	4.18581	4.45994	5.01427	7.64	7.39209	7.63435	7.63621	7.68954	7.39309	7.52828	7.65569	7.58239	7.52941
0.582	6.48577	6.729	6.45839	6.16012	5.91378	5.81832	6.13014	6.71498	6.37153	6.64243	3.95088	2.71665	3.00189	2.23328	2.39028	4.18864	4.46273	5.01812	7.64013	7.39227	7.63448	7.63634	7.68966	7.39325	7.52841	7.65582	7.58254	7.52955
0.583	6.48703	6.72987	6.45984	6.16239	5.9166	5.82183	6.13288	6.71583	6.37321	6.64341	3.95344	2.71723	3.00263	2.23379	2.39149	4.19147	4.46551	5.02196	7.64025	7.39245	7.6346	7.63647	7.68977	7.39342	7.52854	7.65594	7.58268	7.52969
0.584	6.48828	6.73074	6.46128	6.16465	5.9194	5.82532	6.1356	6.71667	6.37488	6.64438	3.956	2.71781	3.00338	2.2343	2.39269	4.19429	4.4683	5.0258	7.64037	7.39262	7.63472	7.6366	7.68989	7.39358	7.52867	7.65606	7.58282	7.52982
0.585	6.48952	6.73161	6.46272	6.16688	5.92217	5.82879	6.1383	6.7175	6.37653	6.64535	3.95857	2.71839	3.00412	2.23481	2.3939	4.19712	4.47108	5.02964	7.64049	7.39279	7.63484	7.63673	7.69	7.39374	7.5288	7.65618	7.58296	7.52995
0.586	6.49075	6.73247	6.46414	6.1691	5.92493	5.83224	6.14097	6.71833	6.37817	6.6463	3.96113	2.71897	3.00487	2.23532	2.3951	4.19995	4.47386	5.03347	7.64061	7.39296	7.63496	7.63685	7.69011	7.3939	7.52892	7.65629	7.5831	7.53008
0.587	6.49197	6.73332	6.46555	6.1713	5.92767	5.83567	6.14362	6.71915	6.37979	6.64725	3.96369	2.71955	3.00561	2.23583	2.39631	4.20277	4.47664	5.0373	7.64073	7.39313	7.63507	7.63697	7.69022	7.39406	7.52904	7.65641	7.58323	7.53021
0.588	6.49318	6.73417	6.46694	6.17348	5.93039	5.83908	6.14625	6.71997	6.3814	6.64819	3.96626	2.72013	3.00636	2.23634	2.39751	4.2056	4.47942	5.04112	7.64084	7.3933	7.63519	7.63709	7.69033	7.39421	7.52916	7.65652	7.58336	7.53034
0.589	6.49438	6.735	6.46833	6.17564	5.93308	5.84247	6.14886	6.72078	6.38299	6.64913	3.96882	2.72071	3.00711	2.23685	2.39872	4.20842	4.4822	5.04494	7.64095	7.39346	7.6353	7.63721	7.69043	7.39436	7.52928	7.65663	7.58349	7.53046
0.59	6.49557	6.73584	6.46971	6.17778	5.93576	5.84584	6.15145	6.72158	6.38457	6.65006	3.97138	2.72129	3.00785	2.23736	2.39992	4.21125	4.48498	5.04875	7.64106	7.39362	7.63541	7.63732	7.69053	7.39451	7.5294	7.65674	7.58362	7.53059
0.591	6.49675	6.73666	6.47107	6.1799	5.93842	5.84919	6.15401	6.72238	6.38614	6.65098	3.97394	2.72187	3.0086	2.23787	2.40113	4.21407	4.48776	5.05256	7.64117	7.39378	7.63552	7.63744	7.69064	7.39466	7.52951	7.65685	7.58375	7.53071
0.592	6.49793	6.73749	6.47243	6.18201	5.94105	5.85252	6.15656	6.72317	6.3877	6.65189	3.97651	2.72245	3.00934	2.23838	2.40234	4.21689	4.49053	5.05637	7.64128	7.39394	7.63562	7.63755	7.69074	7.3948	7.52962	7.65695	7.58387	7.53082
0.593	6.49909	6.7383	6.47377	6.18409	5.94367	5.85583	6.15908	6.72395	6.38924	6.6528	3.97907	2.72303	3.01009	2.2389	2.40354	4.21972	4.49331	5.06016	7.64138	7.39409	7.63573	7.63766	7.69083	7.39495	7.52973	7.65705	7.584	7.53094
0.594	6.50025	6.73911	6.4751	6.18616	5.94627	5.85911	6.16158	6.72473	6.39077	6.6537	3.98163	2.72361	3.01084	2.23941	2.40475	4.22254	4.49608	5.06396	7.64148	7.39424	7.63583	7.63777	7.69093	7.39509	7.52984	7.65715	7.58412	7.53105
0.595	6.50139	6.73991	6.47642	6.18822	5.94885	5.86238	6.16406	6.7255	6.39228	6.65459	3.98419	2.72419	3.01159	2.23992	2.40595	4.22536	4.49885	5.06775	7.64158	7.39439	7.63593	7.63787	7.69102	7.39523	7.52994	7.65725	7.58424	7.53117
0.596	6.50253	6.74071	6.47774	6.19025	5.95141	5.86563	6.16652	6.72627	6.39378	6.65547	3.98675	2.72477	3.01233	2.24043	2.40716	4.22818	4.50162	5.07153	7.64168	7.39454	7.63603	7.63798	7.69112	7.39536	7.53005	7.65735	7.58435	7.53128
0.597	6.50366	6.7415	6.47904	6.19227	5.95395	5.86885	6.16896	6.72703	6.39527	6.65635	3.98931	2.72535	3.01308	2.24094	2.40837	4.231	4.50439	5.07531	7.64178	7.39469	7.63613	7.63808	7.69121	7.3955	7.53015	7.65745	7.58447	7.53138
0.598	6.50478	6.74228	6.48033	6.19427	5.95647	5.87206	6.17138	6.72778	6.39675	6.65722	3.99187	2.72593	3.01383	2.24146	2.40957	4.23382	4.50716	5.07909	7.64187	7.39483	7.63622	7.63818	7.69129	7.39563	7.53025	7.65754	7.58458	7.53149
0.599	6.50589	6.74306	6.48161	6.19625	5.95897	5.87524	6.17378	6.72853	6.39821	6.65809	3.99443	2.72651	3.01457	2.24197	2.41078	4.23664	4.50992	5.08286	7.64197	7.39497	7.63632	7.63828	7.69138	7.39576	7.53034	7.65763	7.58469	7.53159
0.6	6.50699	6.74384	6.48289	6.19822	5.96145	5.87841	6.17616	6.72928	6.39966	6.65895	3.99699	2.7271	3.01532	2.24248	2.41199	4.23946	4.51269	5.08662	7.64206	7.39511	7.63641	7.63838	7.69147	7.39589	7.53044	7.65772	7.5848	7.5317
0.601	6.50809	6.7446	6.48415	6.20016	5.96391	5.88155	6.17852	6.73001	6.4011	6.6598	3.99955	2.72768	3.01607	2.243	2.41319	4.24227	4.51545	5.09038	7.64215	7.39525	7.6365	7.63848	7.69155	7.39602	7.53053	7.65781	7.58491	7.5318
0.602	6.50918	6.74536	6.4854	6.2021	5.96636	5.88468	6.18086	6.73075	6.40253	6.66064	4.00211	2.72826	3.01682	2.24351	2.4144	4.24509	4.51821	5.09413	7.64224	7.39538	7.63658	7.63857	7.69163	7.39614	7.53062	7.6579	7.58502	7.53189
0.603	6.51025	6.74612	6.48664	6.20401	5.96878	5.88778	6.18318	6.73147	6.40395	6.66148	4.00467	2.72884	3.01756	2.24402	2.41561	4.24791	4.52097	5.09788	7.64232	7.39552	7.63667	7.63866	7.69171	7.39626	7.53071	7.65798	7.58512	7.53199
0.604	6.51132	6.74687	6.48788	6.20591	5.97119	5.89087	6.18548	6.73219	6.40535	6.66231	4.00723	2.72942	3.01831	2.24454	2.41681	4.25072	4.52373	5.10163	7.64241	7.39565	7.63676	7.63875	7.69179	7.39638	7.5308	7.65807	7.58522	7.53209
0.605	6.51239	6.74762	6.4891	6.2078	5.97358	5.89393	6.18776	6.73291	6.40674	6.66314	4.00979	2.73001	3.01906	2.24505	2.41802	4.25354	4.52649	5.10536	7.64249	7.39578	7.63684	7.63884	7.69187	7.3965	7.53089	7.65815	7.58532	7.53218
0.606	6.51344	6.74836	6.49032	6.20966	5.97595	5.89697	6.19002	6.73362	6.40813	6.66395	4.01235	2.73059	3.01981	2.24556	2.41923	4.25636	4.52925	5.1091	7.64257	7.3959	7.63692	7.63893	7.69194	7.39661	7.53097	7.65823	7.58542	7.53227
0.607	6.51449	6.74909	6.49152	6.21152	5.9783	5.9	6.19226	6.73432	6.40949	6.66477	4.0149	2.73117	3.02056	2.24608	2.42043	4.25917	4.532	5.11283	7.64265	7.39603	7.637	7.63901	7.69202	7.39673	7.53105	7.65831	7.58552	7.53236
0.608	6.51552	6.74982	6.49272	6.21335	5.98063	5.903	6.19449	6.73502	6.41085	6.66557	4.01746	2.73176	3.02131	2.24659	2.42164	4.26198	4.53476	5.11655	7.64273	7.39615	7.63708	7.6391	7.69209	7.39684	7.53113	7.65838	7.58561	7.53244
0.609	6.51656	6.75054	6.49391	6.21517	5.98295	5.90599	6.19669	6.73572	6.4122	6.66637	4.02002	2.73234	3.02206	2.24711	2.42285	4.2648	4.53751	5.12027	7.6428	7.39627	7.63715	7.63918	7.69216	7.39695	7.53121	7.65846	7.58571	7.53253
0.61	6.51758	6.75126	6.49508	6.21698	5.98525	5.90895	6.19888	6.73641	6.41353	6.66717	4.02258	2.73292	3.0228	2.24762	2.42405	4.26761	4.54026	5.12398	7.64288	7.39639	7.63723	7.63926	7.69223	7.39706	7.53129	7.65853	7.5858	7.53261
0.611	6.51859	6.75197	6.49625	6.21877	5.98753	5.91189	6.20105	6.73709	6.41486	6.66795	4.02513	2.73351	3.02355	2.24814	2.42526	4.27042	4.54301	5.12768	7.64295	7.3965	7.6373	7.63934	7.69229	7.39716	7.53136	7.6586	7.58589	7.53269
0.612	6.5196	6.75268	6.49741	6.22054	5.98979	5.91482	6.2032	6.73777	6.41617	6.66874	4.02769	2.73409	3.0243	2.24865	2.42647	4.27323	4.54576	5.13138	7.64302	7.39662	7.63737	7.63941	7.69236	7.39727	7.53143	7.65867	7.58598	7.53277
0.613	6.5206	6.75338	6.49856	6.2223	5.99203	5.91772	6.20533	6.73844	6.41748	6.66951	4.03025	2.73467	3.02505	2.24917	2.42768	4.27604	4.54851	5.13508	7.64309	7.39673	7.63744	7.63949	7.69242	7.39737	7.5315	7.65874	7.58606	7.53285
0.614	6.52159	6.75408	6.49971	6.22405	5.99426	5.92061	6.20744	6.73911	6.41877	6.67028	4.0328	2.73526	3.0258	2.24968	2.42888	4.27885	4.55125	5.13877	7.64315	7.39684	7.6375	7.63956	7.69248	7.39747	7.53157	7.6588	7.58615	7.53293
0.615	6.52258	6.75477	6.50084	6.22578	5.99646	5.92347	6.20954	6.73977	6.42005	6.67104	4.03536	2.73584	3.02655	2.2502	2.43009	4.28166	4.554	5.14245	7.64322	7.39695	7.63757	7.63963	7.69254	7.39756	7.53164	7.65887	7.58623	7.533
0.616	6.52356	6.75546	6.50197	6.22749	5.99866	5.92632	6.21162	6.74043	6.42132	6.6718	4.03791	2.73643	3.0273	2.25071	2.4313	4.28447	4.55674	5.14613	7.64328	7.39706	7.63763	7.6397	7.6926	7.39766	7.5317	7.65893	7.58631	7.53307
0.617	6.52453	6.75614	6.50308	6.22919	6.00083	5.92914	6.21368	6.74108	6.42258	6.67255	4.04047	2.73701	3.02805	2.25123	2.43251	4.28728	4.55948	5.1498	7.64335	7.39716	7.6377	7.63977	7.69266	7.39775	7.53177	7.65899	7.58639	7.53314
0.618	6.52549	6.75681	6.50419	6.23088	6.00298	5.93195	6.21572	6.74173	6.42383	6.6733	4.04302	2.7376	3.0288	2.25175	2.43371	4.29009	4.56222	5.15347	7.64341	7.39726	7.63776	7.63983	7.69271	7.39785	7.53183	7.65905	7.58647	7.53321
0.619	6.52644	6.75749	6.50529	6.23255	6.00512	5.93473	6.21775	6.74237	6.42507	6.67404	4.04558	2.73818	3.02955	2.25226	2.43492	4.29289	4.56496	5.15713	7.64346	7.39736	7.63781	7.6399	7.69277	7.39794	7.53189	7.65911	7.58654	7.53328
0.62	6.52739	6.75815	6.50639	6.23421	6.00725	5.9375	6.21976	6.74301	6.4263	6.67477	4.04813	2.73877	3.0303	2.25278	2.43613	4.2957	4.5677	5.16079	7.64352	7.39746	7.63787	7.63996	7.69282	7.39802	7.53195	7.65917	7.58662	7.53334
0.621	6.52834	6.75881	6.50747	6.23585	6.00935	5.94025	6.22175	6.74365	6.42752	6.6755	4.05068	2.73935	3.03105	2.2533	2.43734	4.2985	4.57043	5.16444	7.64358	7.39756	7.63793	7.64002	7.69287	7.39811	7.532	7.65922	7.58669	7.53341
0.622	6.52927	6.75947	6.50855	6.23749	6.01144	5.94298	6.22373	6.74427	6.42873	6.67622	4.05324	2.73994	3.0318	2.25381	2.43854	4.30131	4.57317	5.16808	7.64363	7.39765	7.63798	7.64008	7.69292	7.39819	7.53206	7.65927	7.58676	7.53347
0.623	6.5302	6.76012	6.50962	6.2391	6.01351	5.94568	6.22569	6.7449	6.42993	6.67694	4.05579	2.74052	3.03255	2.25433	2.43975	4.30411	4.5759	5.17172	7.64368	7.39775	7.63803	7.64014	7.69296	7.39828	7.53211	7.65932	7.58683	7.53353
0.624	6.53112	6.76077	6.51068	6.24071	6.01557	5.94837	6.22763	6.74552	6.43112	6.67765	4.05834	2.74111	3.0333	2.25485	2.44096	4.30692	4.57863	5.17535	7.64373	7.39784	7.63808	7.6402	7.69301	7.39836	7.53216	7.65937	7.5869	7.53359
0.625	6.53203	6.76141	6.51173	6.2423	6.0176	5.95105	6.22956	6.74613	6.4323	6.67836	4.0609	2.74169	3.03405	2.25536	2.44217	4.30972	4.58136	5.17898	7.64378	7.39793	7.63813	7.64025	7.69305	7.39844	7.53221	7.65942	7.58696	7.53364
0.626	6.53294	6.76205	6.51277	6.24387	6.01963	5.9537	6.23147	6.74674	6.43347	6.67906	4.06345	2.74228	3.0348	2.25588	2.44338	4.31252	4.58409	5.1826	7.64383	7.39801	7.63818	7.64031	7.6931	7.39851	7.53226	7.65947	7.58703	7.5337
0.627	6.53384	6.76268	6.51381	6.24544	6.02163	5.95633	6.23337	6.74734	6.43463	6.67975	4.066	2.74286	3.03556	2.2564	2.44459	4.31532	4.58681	5.18621	7.64387	7.3981	7.63822	7.64036	7.69314	7.39859	7.5323	7.65951	7.58709	7.53375
0.628	6.53473	6.76331	6.51484	6.24699	6.02362	5.95894	6.23525	6.74794	6.43579	6.68044	4.06855	2.74345	3.03631	2.25692	2.44579	4.31812	4.58954	5.18982	7.64392	7.39818	7.63827	7.64041	7.69318	7.39866	7.53234	7.65956	7.58715	7.5338
0.629	6.53562	6.76393	6.51586	6.24852	6.0256	5.96154	6.23711	6.74854	6.43693	6.68112	4.0711	2.74404	3.03706	2.25744	2.447	4.32092	4.59226	5.19342	7.64396	7.39826	7.63831	7.64046	7.69321	7.39873	7.53239	7.6596	7.58721	7.53385
0.63	6.5365	6.76455	6.51687	6.25005	6.02755	5.96411	6.23896	6.74913	6.43806	6.6818	4.07365	2.74462	3.03781	2.25795	2.44821	4.32372	4.59498	5.19702	7.644	7.39834	7.63835	7.6405	7.69325	7.3988	7.53243	7.65964	7.58727	7.5339
0.631	6.53738	6.76516	6.51788	6.25156	6.0295	5.96667	6.24079	6.74971	6.43919	6.68248	4.0762	2.74521	3.03856	2.25847	2.44942	4.32652	4.5977	5.2006	7.64404	7.39842	7.63839	7.64055	7.69328	7.39887	7.53247	7.65968	7.58732	7.53394
0.632	6.53825	6.76577	6.51888	6.25306	6.03142	5.96921	6.24261	6.75029	6.44031	6.68315	4.07875	2.7458	3.03931	2.25899	2.45063	4.32932	4.60042	5.20419	7.64408	7.3985	7.63843	7.64059	7.69332	7.39893	7.5325	7.65971	7.58738	7.53399
0.633	6.53911	6.76638	6.51987	6.25455	6.03333	5.97173	6.24441	6.75087	6.44141	6.68381	4.0813	2.74638	3.04006	2.25951	2.45184	4.33212	4.60314	5.20776	7.64411	7.39857	7.63847	7.64063	7.69335	7.399	7.53254	7.65975	7.58743	7.53403
0.634	6.53996	6.76698	6.52086	6.25602	6.03523	5.97423	6.24619	6.75144	6.44251	6.68447	4.08385	2.74697	3.04082	2.26003	2.45304	4.33491	4.60586	5.21133	7.64415	7.39865	7.6385	7.64067	7.69338	7.39906	7.53257	7.65978	7.58748	7.53407
0.635	6.54081	6.76757	6.52183	6.25749	6.03711	5.97672	6.24797	6.75201	6.4436	6.68512	4.0864	2.74756	3.04157	2.26055	2.45425	4.33771	4.60857	5.2149	7.64418	7.39872	7.63853	7.64071	7.69341	7.39912	7.5326	7.65982	7.58753	7.53411
0.636	6.54165	6.76816	6.5228	6.25894	6.03897	5.97918	6.24972	6.75257	6.44468	6.68577	4.08895	2.74815	3.04232	2.26107	2.45546	4.3405	4.61128	5.21845	7.64421	7.39878	7.63856	7.64075	7.69344	7.39918	7.53263	7.65985	7.58758	7.53415
0.637	6.54249	6.76875	6.52377	6.26038	6.04082	5.98163	6.25147	6.75313	6.44575	6.68641	4.0915	2.74873	3.04307	2.26158	2.45667	4.3433	4.61399	5.22201	7.64424	7.39885	7.63859	7.64079	7.69346	7.39923	7.53266	7.65988	7.58762	7.53418
0.638	6.54332	6.76933	6.52472	6.2618	6.04266	5.98406	6.25319	6.75369	6.44682	6.68705	4.09405	2.74932	3.04382	2.2621	2.45788	4.34609	4.6167	5.22555	7.64427	7.39892	7.63862	7.64082	7.69348	7.39929	7.53269	7.6599	7.58767	7.53422
0.639	6.54414	6.76991	6.52567	6.26322	6.04448	5.98647	6.25491	6.75424	6.44787	6.68768	4.0966	2.74991	3.04458	2.26262	2.45909	4.34888	4.61941	5.22909	7.6443	7.39898	7.63865	7.64085	7.69351	7.39934	7.53271	7.65993	7.58771	7.53425
0.64	6.54496	6.77048	6.52661	6.26462	6.04628	5.98886	6.25661	6.75478	6.44892	6.68831	4.09914	2.7505	3.04533	2.26314	2.4603	4.35168	4.62212	5.23262	7.64432	7.39904	7.63868	7.64089	7.69353	7.39939	7.53274	7.65996	7.58775	7.53428
0.641	6.54577	6.77105	6.52755	6.26601	6.04807	5.99124	6.25829	6.75533	6.44995	6.68893	4.10169	2.75108	3.04608	2.26366	2.46151	4.35447	4.62482	5.23614	7.64435	7.3991	7.6387	7.64092	7.69355	7.39944	7.53276	7.65998	7.58779	7.53431
0.642	6.54658	6.77162	6.52848	6.26739	6.04985	5.99359	6.25996	6.75586	6.45098	6.68955	4.10424	2.75167	3.04683	2.26418	2.46272	4.35726	4.62752	5.23966	7.64437	7.39916	7.63872	7.64094	7.69357	7.39949	7.53278	7.66	7.58783	7.53434
0.643	6.54738	6.77218	6.5294	6.26876	6.05161	5.99593	6.26162	6.7564	6.45201	6.69016	4.10678	2.75226	3.04759	2.2647	2.46392	4.36005	4.63023	5.24317	7.64439	7.39922	7.63874	7.64097	7.69358	7.39954	7.5328	7.66002	7.58787	7.53436
0.644	6.54817	6.77273	6.53031	6.27012	6.05335	5.99826	6.26327	6.75693	6.45302	6.69077	4.10933	2.75285	3.04834	2.26522	2.46513	4.36284	4.63292	5.24668	7.64441	7.39927	7.63876	7.641	7.6936	7.39958	7.53281	7.66004	7.5879	7.53439
0.645	6.54896	6.77329	6.53122	6.27147	6.05509	6.00056	6.2649	6.75745	6.45403	6.69137	4.11188	2.75344	3.04909	2.26574	2.46634	4.36563	4.63562	5.25018	7.64443	7.39932	7.63878	7.64102	7.69361	7.39963	7.53283	7.66006	7.58794	7.53441
0.646	6.54975	6.77383	6.53212	6.2728	6.0568	6.00285	6.26651	6.75797	6.45502	6.69197	4.11442	2.75403	3.04985	2.26626	2.46755	4.36841	4.63832	5.25367	7.64444	7.39938	7.6388	7.64104	7.69363	7.39967	7.53284	7.66007	7.58797	7.53443
0.647	6.55052	6.77438	6.53302	6.27413	6.05851	6.00512	6.26812	6.75849	6.45601	6.69256	4.11697	2.75462	3.0506	2.26679	2.46876	4.3712	4.64101	5.25715	7.64446	7.39942	7.63881	7.64106	7.69364	7.39971	7.53286	7.66009	7.588	7.53445
0.648	6.55129	6.77492	6.53391	6.27544	6.0602	6.00737	6.26971	6.759	6.45699	6.69315	4.11951	2.75521	3.05135	2.26731	2.46997	4.37399	4.6437	5.26063	7.64447	7.39947	7.63883	7.64108	7.69365	7.39974	7.53287	7.6601	7.58803	7.53447
0.649	6.55206	6.77545	6.53479	6.27675	6.06187	6.00961	6.27128	6.75951	6.45797	6.69373	4.12206	2.75579	3.0521	2.26783	2.47118	4.37677	4.6464	5.2641	7.64448	7.39952	7.63884	7.6411	7.69365	7.39978	7.53288	7.66011	7.58806	7.53448
0.65	6.55282	6.77598	6.53566	6.27804	6.06353	6.01182	6.27285	6.76001	6.45894	6.69431	4.1246	2.75638	3.05286	2.26835	2.47239	4.37955	4.64908	5.26756	7.64449	7.39956	7.63885	7.64112	7.69366	7.39981	7.53288	7.66012	7.58809	7.5345
0.651	6.55357	6.77651	6.53653	6.27932	6.06518	6.01402	6.2744	6.76052	6.45989	6.69489	4.12714	2.75697	3.05361	2.26887	2.4736	4.38234	4.65177	5.27102	7.6445	7.39961	7.63886	7.64113	7.69367	7.39985	7.53289	7.66013	7.58811	7.53451
0.652	6.55432	6.77704	6.5374	6.28059	6.06682	6.01621	6.27594	6.76101	6.46085	6.69546	4.12969	2.75756	3.05437	2.26939	2.47481	4.38512	4.65446	5.27447	7.64451	7.39965	7.63886	7.64115	7.69367	7.39988	7.53289	7.66014	7.58813	7.53452
0.653	6.55507	6.77756	6.53825	6.28186	6.06844	6.01838	6.27747	6.7615	6.46179	6.69602	4.13223	2.75815	3.05512	2.26991	2.47602	4.3879	4.65714	5.27791	7.64452	7.39969	7.63887	7.64116	7.69367	7.39991	7.5329	7.66014	7.58816	7.53453
0.654	6.5558	6.77807	6.5391	6.28311	6.07005	6.02053	6.27898	6.76199	6.46273	6.69659	4.13477	2.75874	3.05587	2.27043	2.47723	4.39068	4.65982	5.28134	7.64452	7.39972	7.63888	7.64117	7.69367	7.39993	7.5329	7.66015	7.58818	7.53454
0.655	6.55654	6.77858	6.53995	6.28435	6.07164	6.02266	6.28048	6.76248	6.46365	6.69714	4.13731	2.75933	3.05663	2.27096	2.47844	4.39346	4.6625	5.28477	7.64453	7.39976	7.63888	7.64118	7.69367	7.39996	7.5329	7.66015	7.58819	7.53455
0.656	6.55726	6.77909	6.54079	6.28558	6.07322	6.02478	6.28197	6.76296	6.46458	6.69769	4.13986	2.75992	3.05738	2.27148	2.47965	4.39624	4.66518	5.28819	7.64453	7.39979	7.63888	7.64119	7.69367	7.39998	7.5329	7.66015	7.58821	7.53456
0.657	6.55799	6.77959	6.54162	6.2868	6.07479	6.02688	6.28345	6.76344	6.46549	6.69824	4.1424	2.76051	3.05813	2.272	2.48086	4.39902	4.66786	5.29161	7.64453	7.39983	7.63888	7.64119	7.69367	7.40001	7.53289	7.66015	7.58823	7.53456
0.658	6.5587	6.78009	6.54245	6.28801	6.07635	6.02897	6.28491	6.76391	6.4664	6.69879	4.14494	2.7611	3.05889	2.27252	2.48207	4.4018	4.67053	5.29501	7.64453	7.39986	7.63888	7.6412	7.69366	7.40003	7.53289	7.66015	7.58824	7.53456
0.659	6.55941	6.78059	6.54327	6.28922	6.07789	6.03104	6.28636	6.76438	6.4673	6.69933	4.14748	2.76169	3.05964	2.27304	2.48328	4.40458	4.67321	5.29841	7.64452	7.39989	7.63888	7.6412	7.69366	7.40005	7.53288	7.66015	7.58826	7.53456
0.66	6.56012	6.78108	6.54408	6.29041	6.07942	6.03309	6.28781	6.76484	6.46819	6.69986	4.15002	2.76228	3.0604	2.27357	2.48449	4.40735	4.67588	5.3018	7.64452	7.39992	7.63887	7.6412	7.69365	7.40007	7.53287	7.66015	7.58827	7.53456
0.661	6.56082	6.78157	6.54489	6.29159	6.08094	6.03513	6.28923	6.76531	6.46908	6.70039	4.15256	2.76287	3.06115	2.27409	2.4857	4.41013	4.67855	5.30519	7.64452	7.39994	7.63887	7.6412	7.69364	7.40008	7.53286	7.66014	7.58828	7.53456
0.662	6.56152	6.78205	6.54569	6.29276	6.08244	6.03715	6.29065	6.76576	6.46996	6.70092	4.1551	2.76346	3.06191	2.27461	2.48691	4.4129	4.68121	5.30856	7.64451	7.39997	7.63886	7.6412	7.69363	7.4001	7.53285	7.66013	7.58829	7.53456
0.663	6.56221	6.78254	6.54649	6.29393	6.08394	6.03915	6.29206	6.76622	6.47083	6.70144	4.15764	2.76405	3.06266	2.27514	2.48811	4.41568	4.68388	5.31193	7.6445	7.39999	7.63886	7.6412	7.69362	7.40011	7.53284	7.66013	7.58829	7.53455
0.664	6.56289	6.78301	6.54728	6.29508	6.08542	6.04114	6.29345	6.76667	6.47169	6.70196	4.16018	2.76464	3.06342	2.27566	2.48932	4.41845	4.68654	5.31529	7.64449	7.40001	7.63885	7.6412	7.69361	7.40012	7.53283	7.66012	7.5883	7.53455
0.665	6.56357	6.78349	6.54807	6.29623	6.08689	6.04312	6.29484	6.76712	6.47255	6.70247	4.16271	2.76524	3.06417	2.27618	2.49053	4.42122	4.68921	5.31865	7.64448	7.40003	7.63884	7.64119	7.6936	7.40013	7.53281	7.66011	7.5883	7.53454
0.666	6.56425	6.78396	6.54885	6.29736	6.08834	6.04508	6.29621	6.76756	6.4734	6.70298	4.16525	2.76583	3.06492	2.2767	2.49174	4.42399	4.69187	5.32199	7.64447	7.40005	7.63882	7.64119	7.69358	7.40014	7.53279	7.66009	7.58831	7.53453
0.667	6.56492	6.78442	6.54962	6.29849	6.08979	6.04702	6.29757	6.768	6.47425	6.70348	4.16779	2.76642	3.06568	2.27723	2.49295	4.42676	4.69452	5.32533	7.64446	7.40007	7.63881	7.64118	7.69357	7.40015	7.53278	7.66008	7.58831	7.53452
0.668	6.56558	6.78488	6.55039	6.29961	6.09122	6.04895	6.29892	6.76843	6.47509	6.70399	4.17033	2.76701	3.06643	2.27775	2.49417	4.42953	4.69718	5.32866	7.64444	7.40008	7.6388	7.64117	7.69355	7.40015	7.53276	7.66007	7.58831	7.53451
0.669	6.56625	6.78534	6.55115	6.30071	6.09264	6.05086	6.30026	6.76887	6.47592	6.70448	4.17286	2.7676	3.06719	2.27828	2.49538	4.4323	4.69983	5.33199	7.64443	7.40009	7.63878	7.64116	7.69353	7.40016	7.53274	7.66005	7.58831	7.53449
0.67	6.5669	6.7858	6.55191	6.30181	6.09405	6.05276	6.30159	6.7693	6.47674	6.70498	4.1754	2.76819	3.06794	2.2788	2.49659	4.43507	4.70249	5.3353	7.64441	7.40011	7.63876	7.64115	7.69351	7.40016	7.53271	7.66003	7.58831	7.53448
0.671	6.56755	6.78625	6.55266	6.30291	6.09544	6.05464	6.30291	6.76972	6.47756	6.70546	4.17793	2.76878	3.0687	2.27932	2.4978	4.43784	4.70514	5.33861	7.64439	7.40012	7.63874	7.64114	7.69349	7.40016	7.53269	7.66001	7.5883	7.53446
0.672	6.5682	6.7867	6.55341	6.30399	6.09683	6.05651	6.30422	6.77014	6.47837	6.70595	4.18047	2.76938	3.06946	2.27985	2.49901	4.4406	4.70779	5.34191	7.64437	7.40013	7.63872	7.64112	7.69346	7.40016	7.53266	7.65999	7.5883	7.53444
0.673	6.56884	6.78714	6.55415	6.30506	6.0982	6.05836	6.30551	6.77056	6.47918	6.70643	4.18301	2.76997	3.07021	2.28037	2.50022	4.44337	4.71043	5.3452	7.64435	7.40013	7.6387	7.64111	7.69344	7.40016	7.53264	7.65997	7.58829	7.53442
0.674	6.56948	6.78758	6.55489	6.30613	6.09957	6.0602	6.3068	6.77098	6.47998	6.70691	4.18554	2.77056	3.07097	2.2809	2.50143	4.44613	4.71308	5.34849	7.64432	7.40014	7.63868	7.64109	7.69341	7.40015	7.53261	7.65995	7.58828	7.5344
0.675	6.57011	6.78802	6.55562	6.30718	6.10092	6.06202	6.30808	6.77139	6.48077	6.70738	4.18807	2.77115	3.07172	2.28142	2.50264	4.44889	4.71572	5.35176	7.6443	7.40014	7.63866	7.64107	7.69339	7.40015	7.53258	7.65992	7.58828	7.53438
0.676	6.57074	6.78846	6.55635	6.30823	6.10226	6.06383	6.30934	6.7718	6.48156	6.70785	4.19061	2.77174	3.07248	2.28194	2.50385	4.45165	4.71836	5.35503	7.64428	7.40015	7.63863	7.64106	7.69336	7.40014	7.53255	7.6599	7.58826	7.53436
0.677	6.57136	6.78889	6.55707	6.30927	6.10359	6.06563	6.3106	6.7722	6.48234	6.70831	4.19314	2.77234	3.07323	2.28247	2.50506	4.45442	4.721	5.35829	7.64425	7.40015	7.6386	7.64103	7.69333	7.40013	7.53251	7.65987	7.58825	7.53433
0.678	6.57198	6.78931	6.55778	6.3103	6.1049	6.06741	6.31185	6.7726	6.48312	6.70878	4.19567	2.77293	3.07399	2.28299	2.50627	4.45718	4.72363	5.36154	7.64422	7.40015	7.63858	7.64101	7.6933	7.40012	7.53248	7.65984	7.58824	7.5343
0.679	6.57259	6.78974	6.55849	6.31133	6.10621	6.06917	6.31308	6.773	6.48389	6.70923	4.19821	2.77352	3.07474	2.28352	2.50748	4.45994	4.72627	5.36479	7.64419	7.40015	7.63855	7.64099	7.69327	7.40011	7.53244	7.65982	7.58823	7.53428
0.68	6.5732	6.79016	6.5592	6.31234	6.10751	6.07092	6.31431	6.77339	6.48465	6.70969	4.20074	2.77411	3.0755	2.28404	2.50869	4.46269	4.7289	5.36803	7.64416	7.40014	7.63852	7.64097	7.69323	7.4001	7.53241	7.65979	7.58821	7.53425
0.681	6.57381	6.79057	6.5599	6.31335	6.10879	6.07266	6.31553	6.77379	6.48541	6.71014	4.20327	2.77471	3.07626	2.28457	2.5099	4.46545	4.73153	5.37125	7.64413	7.40014	7.63849	7.64094	7.6932	7.40008	7.53237	7.65975	7.58819	7.53422
0.682	6.57441	6.79099	6.56059	6.31435	6.11007	6.07439	6.31673	6.77417	6.48616	6.71058	4.2058	2.7753	3.07701	2.28509	2.51111	4.46821	4.73416	5.37447	7.6441	7.40013	7.63845	7.64091	7.69316	7.40007	7.53233	7.65972	7.58817	7.53418
0.683	6.575	6.7914	6.56128	6.31534	6.11133	6.0761	6.31793	6.77456	6.4869	6.71102	4.20833	2.77589	3.07777	2.28562	2.51232	4.47096	4.73679	5.37768	7.64406	7.40012	7.63842	7.64088	7.69313	7.40005	7.53229	7.65969	7.58815	7.53415
0.684	6.57559	6.79181	6.56197	6.31633	6.11258	6.07779	6.31912	6.77494	6.48764	6.71146	4.21086	2.77649	3.07852	2.28614	2.51353	4.47372	4.73941	5.38089	7.64403	7.40011	7.63838	7.64085	7.69309	7.40003	7.53225	7.65965	7.58813	7.53412
0.685	6.57618	6.79221	6.56265	6.3173	6.11383	6.07948	6.3203	6.77532	6.48837	6.7119	4.21339	2.77708	3.07928	2.28667	2.51474	4.47647	4.74203	5.38408	7.64399	7.4001	7.63835	7.64082	7.69305	7.40001	7.5322	7.65961	7.58811	7.53408
0.686	6.57676	6.79261	6.56332	6.31827	6.11506	6.08115	6.32147	6.77569	6.4891	6.71233	4.21592	2.77767	3.08004	2.2872	2.51595	4.47922	4.74465	5.38727	7.64395	7.40009	7.63831	7.64079	7.69301	7.39999	7.53216	7.65958	7.58809	7.53404
0.687	6.57734	6.79301	6.56399	6.31923	6.11628	6.0828	6.32263	6.77606	6.48982	6.71276	4.21845	2.77826	3.08079	2.28772	2.51716	4.48197	4.74727	5.39045	7.64391	7.40008	7.63827	7.64076	7.69297	7.39997	7.53211	7.65954	7.58806	7.534
0.688	6.57791	6.7934	6.56466	6.32019	6.1175	6.08444	6.32378	6.77643	6.49054	6.71318	4.22098	2.77886	3.08155	2.28825	2.51837	4.48473	4.74989	5.39362	7.64387	7.40006	7.63823	7.64072	7.69292	7.39994	7.53206	7.6595	7.58804	7.53396
0.689	6.57848	6.79379	6.56532	6.32113	6.1187	6.08607	6.32492	6.7768	6.49125	6.7136	4.22351	2.77945	3.08231	2.28877	2.51958	4.48747	4.7525	5.39678	7.64383	7.40005	7.63819	7.64069	7.69288	7.39992	7.53201	7.65945	7.58801	7.53392
0.69	6.57905	6.79418	6.56598	6.32207	6.11989	6.08769	6.32605	6.77716	6.49195	6.71402	4.22603	2.78005	3.08306	2.2893	2.5208	4.49022	4.75511	5.39993	7.64379	7.40003	7.63814	7.64065	7.69283	7.39989	7.53196	7.65941	7.58798	7.53388
0.691	6.57961	6.79456	6.56663	6.323	6.12108	6.08929	6.32718	6.77752	6.49265	6.71443	4.22856	2.78064	3.08382	2.28982	2.52201	4.49297	4.75772	5.40308	7.64374	7.40001	7.6381	7.64061	7.69279	7.39986	7.53191	7.65937	7.58795	7.53384
0.692	6.58017	6.79495	6.56728	6.32392	6.12225	6.09088	6.32829	6.77787	6.49335	6.71484	4.23109	2.78123	3.08458	2.29035	2.52322	4.49572	4.76033	5.40621	7.6437	7.39999	7.63805	7.64057	7.69274	7.39983	7.53186	7.65932	7.58792	7.53379
0.693	6.58072	6.79532	6.56792	6.32484	6.12341	6.09246	6.3294	6.77823	6.49404	6.71525	4.23361	2.78183	3.08533	2.29088	2.52443	4.49846	4.76293	5.40934	7.64365	7.39997	7.63801	7.64053	7.69269	7.3998	7.5318	7.65928	7.58789	7.53374
0.694	6.58127	6.7957	6.56855	6.32575	6.12457	6.09403	6.3305	6.77857	6.49472	6.71565	4.23614	2.78242	3.08609	2.2914	2.52564	4.50121	4.76554	5.41246	7.6436	7.39994	7.63796	7.64049	7.69264	7.39977	7.53175	7.65923	7.58785	7.5337
0.695	6.58181	6.79607	6.56919	6.32665	6.12571	6.09558	6.33158	6.77892	6.4954	6.71605	4.23866	2.78301	3.08685	2.29193	2.52685	4.50395	4.76814	5.41557	7.64355	7.39992	7.63791	7.64045	7.69259	7.39973	7.53169	7.65918	7.58782	7.53365
0.696	6.58235	6.79644	6.56982	6.32754	6.12684	6.09712	6.33266	6.77926	6.49607	6.71644	4.24119	2.78361	3.0876	2.29246	2.52806	4.50669	4.77073	5.41867	7.6435	7.39989	7.63786	7.6404	7.69254	7.3997	7.53163	7.65913	7.58778	7.5336
0.697	6.58289	6.79681	6.57044	6.32843	6.12797	6.09865	6.33374	6.77961	6.49674	6.71684	4.24371	2.7842	3.08836	2.29298	2.52927	4.50943	4.77333	5.42176	7.64345	7.39987	7.63781	7.64036	7.69248	7.39966	7.53157	7.65908	7.58774	7.53354
0.698	6.58342	6.79717	6.57106	6.32931	6.12909	6.10016	6.3348	6.77994	6.4974	6.71722	4.24624	2.7848	3.08912	2.29351	2.53048	4.51217	4.77592	5.42485	7.6434	7.39984	7.63775	7.64031	7.69243	7.39962	7.53151	7.65902	7.5877	7.53349
0.699	6.58395	6.79753	6.57167	6.33019	6.13019	6.10166	6.33586	6.78028	6.49805	6.71761	4.24876	2.78539	3.08987	2.29404	2.53169	4.51491	4.77852	5.42792	7.64334	7.39981	7.6377	7.64026	7.69237	7.39958	7.53145	7.65897	7.58767	7.53344
0.7	6.58448	6.79789	6.57228	6.33105	6.13129	6.10315	6.3369	6.78061	6.49871	6.71799	4.25128	2.78599	3.09063	2.29456	2.53291	4.51765	4.7811	5.43099	7.64329	7.39977	7.63764	7.64021	7.69232	7.39954	7.53139	7.65892	7.58762	7.53338
0.701	6.585	6.79824	6.57289	6.33191	6.13238	6.10463	6.33794	6.78094	6.49935	6.71837	4.2538	2.78658	3.09139	2.29509	2.53412	4.52039	4.78369	5.43404	7.64323	7.39974	7.63759	7.64016	7.69226	7.3995	7.53132	7.65886	7.58758	7.53332
0.702	6.58551	6.79859	6.57349	6.33277	6.13346	6.1061	6.33897	6.78126	6.49999	6.71874	4.25632	2.78718	3.09215	2.29562	2.53533	4.52312	4.78628	5.43709	7.64317	7.39971	7.63753	7.64011	7.6922	7.39945	7.53126	7.6588	7.58754	7.53326
0.703	6.58603	6.79894	6.57409	6.33361	6.13453	6.10755	6.34	6.78158	6.50063	6.71912	4.25885	2.78777	3.0929	2.29615	2.53654	4.52586	4.78886	5.44013	7.64311	7.39967	7.63747	7.64006	7.69214	7.39941	7.53119	7.65874	7.58749	7.5332
0.704	6.58653	6.79928	6.57468	6.33445	6.13559	6.109	6.34101	6.7819	6.50126	6.71949	4.26137	2.78836	3.09366	2.29667	2.53775	4.52859	4.79144	5.44316	7.64305	7.39963	7.63741	7.64001	7.69208	7.39936	7.53112	7.65868	7.58745	7.53314
0.705	6.58704	6.79962	6.57527	6.33529	6.13664	6.11043	6.34202	6.78222	6.50188	6.71985	4.26389	2.78896	3.09442	2.2972	2.53896	4.53133	4.79402	5.44618	7.64299	7.3996	7.63735	7.63995	7.69201	7.39931	7.53105	7.65862	7.5874	7.53308
0.706	6.58754	6.79996	6.57586	6.33611	6.13769	6.11185	6.34302	6.78253	6.5025	6.72021	4.26641	2.78955	3.09518	2.29773	2.54017	4.53406	4.79659	5.4492	7.64293	7.39956	7.63729	7.63989	7.69195	7.39927	7.53098	7.65856	7.58735	7.53302
0.707	6.58804	6.8003	6.57644	6.33693	6.13872	6.11326	6.34401	6.78284	6.50312	6.72057	4.26893	2.79015	3.09593	2.29826	2.54138	4.53679	4.79917	5.4522	7.64287	7.39951	7.63722	7.63984	7.69188	7.39921	7.53091	7.6585	7.5873	7.53295
0.708	6.58853	6.80063	6.57701	6.33775	6.13975	6.11465	6.34499	6.78315	6.50373	6.72093	4.27144	2.79074	3.09669	2.29878	2.54259	4.53952	4.80174	5.4552	7.6428	7.39947	7.63716	7.63978	7.69182	7.39916	7.53083	7.65843	7.58725	7.53289
0.709	6.58902	6.80096	6.57758	6.33856	6.14077	6.11604	6.34597	6.78346	6.50434	6.72128	4.27396	2.79134	3.09745	2.29931	2.54381	4.54224	4.80431	5.45818	7.64274	7.39943	7.63709	7.63972	7.69175	7.39911	7.53076	7.65837	7.5872	7.53282
0.71	6.58951	6.80129	6.57815	6.33936	6.14178	6.11741	6.34694	6.78376	6.50494	6.72163	4.27648	2.79194	3.09821	2.29984	2.54502	4.54497	4.80687	5.46116	7.64267	7.39938	7.63703	7.63966	7.69168	7.39906	7.53068	7.6583	7.58715	7.53275
0.711	6.58999	6.80162	6.57871	6.34015	6.14278	6.11877	6.3479	6.78406	6.50554	6.72197	4.279	2.79253	3.09896	2.30037	2.54623	4.5477	4.80943	5.46412	7.6426	7.39934	7.63696	7.6396	7.69161	7.399	7.5306	7.65823	7.58709	7.53268
0.712	6.59047	6.80194	6.57927	6.34094	6.14377	6.12013	6.34885	6.78436	6.50613	6.72232	4.28151	2.79313	3.09972	2.3009	2.54744	4.55042	4.812	5.46708	7.64253	7.39929	7.63689	7.63953	7.69154	7.39894	7.53052	7.65816	7.58704	7.53261
0.713	6.59094	6.80226	6.57983	6.34172	6.14476	6.12147	6.3498	6.78465	6.50671	6.72266	4.28403	2.79372	3.10048	2.30143	2.54865	4.55315	4.81455	5.47003	7.64246	7.39924	7.63682	7.63947	7.69147	7.39888	7.53044	7.65809	7.58698	7.53254
0.714	6.59142	6.80257	6.58038	6.3425	6.14573	6.1228	6.35074	6.78494	6.5073	6.72299	4.28655	2.79432	3.10124	2.30195	2.54986	4.55587	4.81711	5.47297	7.64239	7.39919	7.63675	7.6394	7.6914	7.39882	7.53036	7.65802	7.58692	7.53247
0.715	6.59188	6.80289	6.58093	6.34327	6.1467	6.12412	6.35167	6.78523	6.50787	6.72333	4.28906	2.79491	3.102	2.30248	2.55107	4.55859	4.81967	5.4759	7.64232	7.39914	7.63668	7.63934	7.69132	7.39876	7.53028	7.65795	7.58686	7.53239
0.716	6.59235	6.8032	6.58147	6.34403	6.14766	6.12542	6.35259	6.78551	6.50845	6.72366	4.29158	2.79551	3.10275	2.30301	2.55228	4.56131	4.82222	5.47882	7.64224	7.39908	7.6366	7.63927	7.69125	7.3987	7.5302	7.65788	7.5868	7.53232
0.717	6.59281	6.80351	6.58201	6.34479	6.14861	6.12672	6.35351	6.7858	6.50901	6.72398	4.29409	2.7961	3.10351	2.30354	2.5535	4.56403	4.82477	5.48173	7.64217	7.39903	7.63653	7.6392	7.69117	7.39864	7.53011	7.6578	7.58674	7.53224
0.718	6.59327	6.80381	6.58255	6.34554	6.14956	6.12801	6.35442	6.78608	6.50958	6.72431	4.2966	2.7967	3.10427	2.30407	2.55471	4.56675	4.82731	5.48464	7.64209	7.39897	7.63645	7.63913	7.69109	7.39857	7.53003	7.65773	7.58668	7.53216
0.719	6.59372	6.80411	6.58308	6.34629	6.15049	6.12929	6.35532	6.78636	6.51014	6.72463	4.29912	2.7973	3.10503	2.3046	2.55592	4.56946	4.82986	5.48753	7.64201	7.39892	7.63637	7.63906	7.69101	7.39851	7.52994	7.65765	7.58662	7.53208
0.72	6.59417	6.80441	6.58361	6.34703	6.15142	6.13055	6.35622	6.78663	6.51069	6.72495	4.30163	2.79789	3.10579	2.30513	2.55713	4.57218	4.8324	5.49041	7.64194	7.39886	7.6363	7.63899	7.69093	7.39844	7.52985	7.65757	7.58655	7.532
0.721	6.59462	6.80471	6.58413	6.34776	6.15234	6.13181	6.35711	6.7869	6.51124	6.72526	4.30414	2.79849	3.10655	2.30566	2.55834	4.57489	4.83494	5.49329	7.64186	7.3988	7.63622	7.63891	7.69085	7.39837	7.52976	7.65749	7.58648	7.53192
0.722	6.59506	6.805	6.58465	6.34849	6.15326	6.13305	6.35799	6.78717	6.51179	6.72558	4.30665	2.79909	3.1073	2.30618	2.55955	4.57761	4.83747	5.49615	7.64178	7.39874	7.63614	7.63884	7.69077	7.3983	7.52967	7.65741	7.58642	7.53184
0.723	6.5955	6.8053	6.58516	6.34922	6.15416	6.13429	6.35887	6.78744	6.51233	6.72588	4.30916	2.79968	3.10806	2.30671	2.56077	4.58032	4.84001	5.49901	7.6417	7.39868	7.63605	7.63876	7.69069	7.39823	7.52958	7.65733	7.58635	7.53175
0.724	6.59593	6.80559	6.58568	6.34993	6.15506	6.13551	6.35974	6.7877	6.51286	6.72619	4.31167	2.80028	3.10882	2.30724	2.56198	4.58303	4.84254	5.50185	7.64161	7.39861	7.63597	7.63869	7.69061	7.39816	7.52949	7.65725	7.58628	7.53167
0.725	6.59637	6.80587	6.58619	6.35064	6.15595	6.13673	6.3606	6.78796	6.5134	6.72649	4.31418	2.80087	3.10958	2.30777	2.56319	4.58574	4.84507	5.50469	7.64153	7.39855	7.63589	7.63861	7.69052	7.39808	7.52939	7.65717	7.58621	7.53158
0.726	6.5968	6.80616	6.58669	6.35135	6.15684	6.13793	6.36145	6.78822	6.51392	6.72679	4.31669	2.80147	3.11034	2.3083	2.5644	4.58844	4.8476	5.50751	7.64144	7.39848	7.6358	7.63853	7.69043	7.39801	7.5293	7.65708	7.58614	7.5315
0.727	6.59722	6.80644	6.58719	6.35205	6.15771	6.13913	6.3623	6.78848	6.51445	6.72709	4.3192	2.80207	3.1111	2.30883	2.56561	4.59115	4.85012	5.51033	7.64136	7.39842	7.63572	7.63845	7.69035	7.39793	7.5292	7.657	7.58607	7.53141
0.728	6.59764	6.80672	6.58769	6.35275	6.15858	6.14032	6.36314	6.78873	6.51497	6.72739	4.32171	2.80266	3.11185	2.30936	2.56682	4.59386	4.85264	5.51314	7.64127	7.39835	7.63563	7.63837	7.69026	7.39786	7.5291	7.65691	7.58599	7.53132
0.729	6.59806	6.80699	6.58818	6.35343	6.15944	6.14149	6.36398	6.78898	6.51548	6.72768	4.32421	2.80326	3.11261	2.30989	2.56803	4.59656	4.85516	5.51594	7.64118	7.39828	7.63554	7.63829	7.69017	7.39778	7.529	7.65683	7.58592	7.53123
0.73	6.59848	6.80727	6.58867	6.35412	6.1603	6.14266	6.36481	6.78923	6.51599	6.72797	4.32672	2.80386	3.11337	2.31042	2.56925	4.59926	4.85768	5.51872	7.64109	7.39821	7.63545	7.63821	7.69008	7.3977	7.5289	7.65674	7.58584	7.53113
0.731	6.59889	6.80754	6.58916	6.3548	6.16114	6.14382	6.36563	6.78948	6.5165	6.72825	4.32923	2.80445	3.11413	2.31095	2.57046	4.60197	4.86019	5.5215	7.641	7.39814	7.63536	7.63812	7.68999	7.39762	7.5288	7.65665	7.58577	7.53104
0.732	6.5993	6.80781	6.58964	6.35547	6.16198	6.14496	6.36645	6.78972	6.517	6.72854	4.33173	2.80505	3.11489	2.31148	2.57167	4.60467	4.8627	5.52427	7.64091	7.39806	7.63527	7.63804	7.6899	7.39754	7.5287	7.65656	7.58569	7.53095
0.733	6.59971	6.80807	6.59012	6.35614	6.16282	6.1461	6.36726	6.78996	6.5175	6.72882	4.33424	2.80565	3.11565	2.31201	2.57288	4.60737	4.86521	5.52703	7.64082	7.39799	7.63518	7.63795	7.6898	7.39745	7.5286	7.65647	7.58561	7.53085
0.734	6.60011	6.80834	6.5906	6.3568	6.16364	6.14723	6.36806	6.7902	6.51799	6.7291	4.33674	2.80625	3.11641	2.31254	2.57409	4.61006	4.86771	5.52978	7.64073	7.39791	7.63509	7.63786	7.68971	7.39737	7.52849	7.65637	7.58553	7.53075
0.735	6.60051	6.8086	6.59107	6.35746	6.16446	6.14835	6.36886	6.79044	6.51848	6.72937	4.33925	2.80684	3.11717	2.31307	2.57531	4.61276	4.87022	5.53252	7.64063	7.39784	7.63499	7.63778	7.68962	7.39728	7.52839	7.65628	7.58545	7.53066
0.736	6.60091	6.80886	6.59154	6.35811	6.16527	6.14946	6.36965	6.79067	6.51897	6.72964	4.34175	2.80744	3.11793	2.3136	2.57652	4.61545	4.87272	5.53525	7.64054	7.39776	7.6349	7.63769	7.68952	7.3972	7.52828	7.65618	7.58537	7.53056
0.737	6.6013	6.80911	6.592	6.35876	6.16608	6.15056	6.37044	6.7909	6.51945	6.72991	4.34425	2.80804	3.11868	2.31413	2.57773	4.61815	4.87521	5.53797	7.64044	7.39768	7.6348	7.6376	7.68942	7.39711	7.52817	7.65609	7.58528	7.53046
0.738	6.60169	6.80936	6.59246	6.3594	6.16688	6.15166	6.37122	6.79113	6.51993	6.73018	4.34675	2.80863	3.11944	2.31466	2.57894	4.62084	4.87771	5.54068	7.64034	7.3976	7.6347	7.6375	7.68932	7.39702	7.52806	7.65599	7.5852	7.53036
0.739	6.60208	6.80962	6.59292	6.36003	6.16767	6.15274	6.37199	6.79136	6.5204	6.73044	4.34925	2.80923	3.1202	2.31519	2.58015	4.62353	4.8802	5.54338	7.64024	7.39752	7.63461	7.63741	7.68922	7.39693	7.52795	7.65589	7.58511	7.53026
0.74	6.60246	6.80986	6.59338	6.36067	6.16845	6.15381	6.37276	6.79158	6.52087	6.7307	4.35175	2.80983	3.12096	2.31572	2.58136	4.62622	4.88269	5.54607	7.64015	7.39744	7.63451	7.63732	7.68912	7.39684	7.52784	7.65579	7.58503	7.53015
0.741	6.60284	6.81011	6.59383	6.36129	6.16923	6.15488	6.37352	6.79181	6.52134	6.73096	4.35425	2.81043	3.12172	2.31625	2.58258	4.62891	4.88517	5.54875	7.64004	7.39735	7.63441	7.63722	7.68902	7.39674	7.52773	7.6557	7.58494	7.53005
0.742	6.60322	6.81036	6.59428	6.36191	6.17	6.15594	6.37428	6.79202	6.5218	6.73122	4.35675	2.81103	3.12248	2.31678	2.58379	4.6316	4.88766	5.55142	7.63994	7.39727	7.6343	7.63713	7.68892	7.39665	7.52762	7.65559	7.58485	7.52994
0.743	6.6036	6.8106	6.59472	6.36253	6.17077	6.15699	6.37503	6.79224	6.52226	6.73147	4.35925	2.81162	3.12324	2.31731	2.585	4.63428	4.89014	5.55408	7.63984	7.39718	7.6342	7.63703	7.68882	7.39656	7.5275	7.65549	7.58476	7.52984
0.744	6.60397	6.81084	6.59516	6.36314	6.17153	6.15803	6.37577	6.79246	6.52271	6.73172	4.36175	2.81222	3.124	2.31785	2.58621	4.63697	4.89262	5.55673	7.63974	7.39709	7.6341	7.63694	7.68871	7.39646	7.52739	7.65539	7.58467	7.52973
0.745	6.60434	6.81107	6.5956	6.36375	6.17228	6.15906	6.37651	6.79267	6.52316	6.73197	4.36425	2.81282	3.12476	2.31838	2.58742	4.63965	4.89509	5.55937	7.63963	7.39701	7.63399	7.63684	7.68861	7.39636	7.52727	7.65529	7.58458	7.52962
0.746	6.6047	6.81131	6.59603	6.36435	6.17303	6.16008	6.37724	6.79288	6.52361	6.73222	4.36675	2.81342	3.12552	2.31891	2.58864	4.64233	4.89756	5.562	7.63953	7.39692	7.63389	7.63674	7.6885	7.39626	7.52715	7.65518	7.58449	7.52951
0.747	6.60506	6.81154	6.59646	6.36495	6.17377	6.1611	6.37797	6.79308	6.52405	6.73246	4.36924	2.81401	3.12628	2.31944	2.58985	4.64501	4.90003	5.56462	7.63942	7.39683	7.63378	7.63664	7.68839	7.39616	7.52703	7.65508	7.58439	7.5294
0.748	6.60542	6.81177	6.59689	6.36554	6.1745	6.1621	6.37869	6.79329	6.52449	6.7327	4.37174	2.81461	3.12704	2.31997	2.59106	4.64769	4.9025	5.56723	7.63931	7.39673	7.63367	7.63654	7.68829	7.39606	7.52691	7.65497	7.5843	7.52929
0.749	6.60578	6.812	6.59732	6.36613	6.17523	6.1631	6.37941	6.79349	6.52493	6.73294	4.37423	2.81521	3.1278	2.3205	2.59227	4.65037	4.90497	5.56984	7.6392	7.39664	7.63356	7.63643	7.68818	7.39596	7.52679	7.65486	7.5842	7.52918
0.75	6.60613	6.81222	6.59774	6.36671	6.17595	6.16409	6.38012	6.79369	6.52536	6.73317	4.37673	2.81581	3.12856	2.32103	2.59348	4.65304	4.90743	5.57243	7.63909	7.39655	7.63346	7.63633	7.68807	7.39586	7.52667	7.65475	7.5841	7.52906
0.751	6.60649	6.81244	6.59816	6.36729	6.17666	6.16507	6.38082	6.79389	6.52579	6.7334	4.37922	2.81641	3.12931	2.32156	2.59469	4.65572	4.90988	5.57501	7.63898	7.39645	7.63334	7.63623	7.68796	7.39575	7.52655	7.65464	7.58401	7.52895
0.752	6.60683	6.81266	6.59857	6.36786	6.17737	6.16605	6.38152	6.79409	6.52621	6.73363	4.38171	2.817	3.13007	2.3221	2.59591	4.65839	4.91234	5.57758	7.63887	7.39636	7.63323	7.63612	7.68784	7.39565	7.52642	7.65453	7.58391	7.52883
0.753	6.60718	6.81288	6.59898	6.36843	6.17807	6.16701	6.38222	6.79428	6.52663	6.73386	4.38421	2.8176	3.13083	2.32263	2.59712	4.66106	4.91479	5.58014	7.63876	7.39626	7.63312	7.63601	7.68773	7.39554	7.5263	7.65442	7.58381	7.52871
0.754	6.60752	6.8131	6.59939	6.36899	6.17877	6.16797	6.38291	6.79447	6.52705	6.73408	4.3867	2.8182	3.13159	2.32316	2.59833	4.66373	4.91724	5.58269	7.63865	7.39616	7.63301	7.63591	7.68762	7.39544	7.52617	7.65431	7.58371	7.52859
0.755	6.60786	6.81331	6.5998	6.36955	6.17946	6.16892	6.38359	6.79466	6.52746	6.73431	4.38919	2.8188	3.13235	2.32369	2.59954	4.6664	4.91969	5.58523	7.63853	7.39606	7.63289	7.6358	7.6875	7.39533	7.52605	7.65419	7.58361	7.52848
0.756	6.6082	6.81352	6.6002	6.37011	6.18015	6.16986	6.38427	6.79485	6.52787	6.73453	4.39168	2.8194	3.13311	2.32422	2.60075	4.66907	4.92213	5.58776	7.63842	7.39596	7.63278	7.63569	7.68739	7.39522	7.52592	7.65408	7.5835	7.52836
0.757	6.60853	6.81373	6.6006	6.37066	6.18082	6.1708	6.38494	6.79503	6.52828	6.73474	4.39417	2.82	3.13387	2.32475	2.60197	4.67173	4.92457	5.59028	7.6383	7.39586	7.63266	7.63558	7.68727	7.39511	7.52579	7.65396	7.5834	7.52823
0.758	6.60886	6.81394	6.60099	6.3712	6.1815	6.17172	6.38561	6.79522	6.52868	6.73496	4.39666	2.8206	3.13463	2.32529	2.60318	4.6744	4.92701	5.59279	7.63818	7.39575	7.63254	7.63547	7.68715	7.395	7.52566	7.65385	7.58329	7.52811
0.759	6.60919	6.81415	6.60139	6.37174	6.18216	6.17264	6.38627	6.7954	6.52908	6.73517	4.39915	2.82119	3.13539	2.32582	2.60439	4.67706	4.92944	5.59529	7.63806	7.39565	7.63243	7.63536	7.68703	7.39488	7.52553	7.65373	7.58319	7.52799
0.76	6.60951	6.81435	6.60178	6.37228	6.18283	6.17355	6.38693	6.79557	6.52947	6.73538	4.40164	2.82179	3.13615	2.32635	2.6056	4.67972	4.93188	5.59778	7.63794	7.39555	7.63231	7.63524	7.68691	7.39477	7.52539	7.65361	7.58308	7.52786
0.761	6.60984	6.81455	6.60216	6.37281	6.18348	6.17446	6.38758	6.79575	6.52986	6.73559	4.40412	2.82239	3.13691	2.32688	2.60681	4.68238	4.9343	5.60026	7.63782	7.39544	7.63219	7.63513	7.68679	7.39465	7.52526	7.65349	7.58297	7.52774
0.762	6.61016	6.81475	6.60255	6.37334	6.18413	6.17535	6.38823	6.79592	6.53025	6.73579	4.40661	2.82299	3.13767	2.32741	2.60803	4.68504	4.93673	5.60273	7.6377	7.39533	7.63206	7.63501	7.68667	7.39454	7.52512	7.65337	7.58287	7.52761
0.763	6.61047	6.81494	6.60293	6.37386	6.18478	6.17624	6.38887	6.7961	6.53064	6.736	4.4091	2.82359	3.13843	2.32795	2.60924	4.6877	4.93915	5.60519	7.63758	7.39522	7.63194	7.6349	7.68655	7.39442	7.52499	7.65325	7.58276	7.52749
0.764	6.61079	6.81514	6.60331	6.37438	6.18542	6.17712	6.38951	6.79627	6.53102	6.7362	4.41158	2.82419	3.13919	2.32848	2.61045	4.69035	4.94157	5.60764	7.63746	7.39511	7.63182	7.63478	7.68643	7.3943	7.52485	7.65313	7.58265	7.52736
0.765	6.6111	6.81533	6.60368	6.3749	6.18605	6.178	6.39014	6.79643	6.5314	6.7364	4.41406	2.82479	3.13995	2.32901	2.61166	4.693	4.94399	5.61008	7.63733	7.395	7.6317	7.63466	7.6863	7.39418	7.52472	7.653	7.58253	7.52723
0.766	6.61141	6.81552	6.60405	6.37541	6.18668	6.17887	6.39077	6.7966	6.53177	6.73659	4.41655	2.82539	3.14071	2.32954	2.61288	4.69566	4.9464	5.61251	7.63721	7.39489	7.63157	7.63454	7.68618	7.39406	7.52458	7.65288	7.58242	7.5271
0.767	6.61171	6.81571	6.60442	6.37592	6.1873	6.17973	6.39139	6.79676	6.53214	6.73678	4.41903	2.82599	3.14147	2.33008	2.61409	4.69831	4.94881	5.61493	7.63708	7.39478	7.63144	7.63442	7.68605	7.39394	7.52444	7.65275	7.58231	7.52697
0.768	6.61202	6.81589	6.60479	6.37642	6.18792	6.18058	6.39201	6.79692	6.53251	6.73698	4.42151	2.82658	3.14223	2.33061	2.6153	4.70096	4.95122	5.61733	7.63696	7.39467	7.63132	7.6343	7.68592	7.39382	7.5243	7.65263	7.58219	7.52683
0.769	6.61232	6.81608	6.60515	6.37692	6.18853	6.18142	6.39262	6.79708	6.53288	6.73716	4.42399	2.82718	3.14299	2.33114	2.61651	4.7036	4.95362	5.61973	7.63683	7.39455	7.63119	7.63418	7.6858	7.3937	7.52415	7.6525	7.58208	7.5267
0.77	6.61261	6.81626	6.60551	6.37741	6.18914	6.18226	6.39323	6.79724	6.53324	6.73735	4.42648	2.82778	3.14375	2.33167	2.61772	4.70625	4.95602	5.62212	7.6367	7.39443	7.63106	7.63406	7.68567	7.39357	7.52401	7.65237	7.58196	7.52657
0.771	6.61291	6.81644	6.60587	6.3779	6.18974	6.1831	6.39383	6.79739	6.53359	6.73753	4.42896	2.82838	3.14451	2.33221	2.61894	4.70889	4.95842	5.6245	7.63657	7.39432	7.63093	7.63394	7.68554	7.39344	7.52387	7.65225	7.58184	7.52643
0.772	6.6132	6.81661	6.60622	6.37839	6.19033	6.18392	6.39443	6.79755	6.53395	6.73772	4.43143	2.82898	3.14527	2.33274	2.62015	4.71154	4.96082	5.62687	7.63644	7.3942	7.6308	7.63381	7.68541	7.39332	7.52372	7.65212	7.58173	7.52629
0.773	6.61349	6.81679	6.60658	6.37887	6.19092	6.18474	6.39502	6.7977	6.5343	6.7379	4.43391	2.82958	3.14603	2.33327	2.62136	4.71418	4.96321	5.62922	7.63631	7.39408	7.63067	7.63369	7.68528	7.39319	7.52358	7.65199	7.58161	7.52616
0.774	6.61378	6.81696	6.60692	6.37935	6.19151	6.18555	6.39561	6.79784	6.53465	6.73807	4.43639	2.83018	3.14679	2.3338	2.62257	4.71682	4.9656	5.63157	7.63617	7.39396	7.63054	7.63356	7.68514	7.39306	7.52343	7.65185	7.58149	7.52602
0.775	6.61407	6.81713	6.60727	6.37982	6.19209	6.18636	6.39619	6.79799	6.53499	6.73825	4.43887	2.83078	3.14755	2.33434	2.62378	4.71945	4.96798	5.63391	7.63604	7.39384	7.6304	7.63343	7.68501	7.39293	7.52328	7.65172	7.58137	7.52588
0.776	6.61435	6.8173	6.60761	6.38029	6.19266	6.18715	6.39677	6.79814	6.53534	6.73842	4.44134	2.83138	3.14831	2.33487	2.625	4.72209	4.97036	5.63624	7.63591	7.39372	7.63027	7.6333	7.68488	7.3928	7.52314	7.65159	7.58124	7.52574
0.777	6.61463	6.81747	6.60795	6.38076	6.19323	6.18794	6.39735	6.79828	6.53567	6.73859	4.44382	2.83198	3.14907	2.3354	2.62621	4.72472	4.97274	5.63855	7.63577	7.39359	7.63013	7.63318	7.68474	7.39267	7.52299	7.65145	7.58112	7.5256
0.778	6.61491	6.81763	6.60829	6.38122	6.1938	6.18873	6.39792	6.79842	6.53601	6.73876	4.4463	2.83258	3.14984	2.33594	2.62742	4.72736	4.97512	5.64086	7.63564	7.39347	7.63	7.63305	7.68461	7.39254	7.52284	7.65132	7.581	7.52546
0.779	6.61518	6.8178	6.60863	6.38168	6.19436	6.18951	6.39849	6.79856	6.53634	6.73893	4.44877	2.83318	3.1506	2.33647	2.62863	4.72999	4.97749	5.64316	7.6355	7.39334	7.62986	7.63292	7.68447	7.3924	7.52269	7.65118	7.58087	7.52531
0.78	6.61545	6.81796	6.60896	6.38213	6.19491	6.19028	6.39905	6.79869	6.53667	6.73909	4.45124	2.83378	3.15136	2.337	2.62985	4.73262	4.97986	5.64544	7.63536	7.39322	7.62972	7.63278	7.68433	7.39227	7.52253	7.65105	7.58075	7.52517
0.781	6.61572	6.81812	6.60929	6.38258	6.19546	6.19104	6.39961	6.79883	6.537	6.73925	4.45372	2.83438	3.15212	2.33754	2.63106	4.73524	4.98222	5.64772	7.63522	7.39309	7.62959	7.63265	7.68419	7.39213	7.52238	7.65091	7.58062	7.52502
0.782	6.61599	6.81827	6.60961	6.38303	6.19601	6.1918	6.40016	6.79896	6.53732	6.73941	4.45619	2.83498	3.15288	2.33807	2.63227	4.73787	4.98458	5.64998	7.63508	7.39296	7.62945	7.63252	7.68405	7.392	7.52223	7.65077	7.58049	7.52488
0.783	6.61626	6.81843	6.60994	6.38347	6.19655	6.19256	6.40071	6.79909	6.53764	6.73957	4.45866	2.83558	3.15364	2.3386	2.63348	4.74049	4.98694	5.65224	7.63494	7.39283	7.62931	7.63238	7.68391	7.39186	7.52207	7.65063	7.58037	7.52473
0.784	6.61652	6.81858	6.61026	6.38391	6.19708	6.1933	6.40125	6.79922	6.53796	6.73972	4.46113	2.83618	3.1544	2.33914	2.63469	4.74311	4.9893	5.65448	7.6348	7.3927	7.62916	7.63225	7.68377	7.39172	7.52191	7.65049	7.58024	7.52458
0.785	6.61678	6.81873	6.61058	6.38434	6.19761	6.19404	6.40179	6.79935	6.53827	6.73988	4.4636	2.83678	3.15516	2.33967	2.63591	4.74574	4.99165	5.65672	7.63466	7.39257	7.62902	7.63211	7.68363	7.39158	7.52176	7.65035	7.58011	7.52443
0.786	6.61704	6.81888	6.6109	6.38477	6.19814	6.19478	6.40233	6.79947	6.53858	6.74003	4.46607	2.83738	3.15592	2.3402	2.63712	4.74835	4.994	5.65894	7.63452	7.39244	7.62888	7.63198	7.68349	7.39144	7.5216	7.65021	7.57998	7.52428
0.787	6.61729	6.81903	6.61121	6.3852	6.19866	6.1955	6.40286	6.7996	6.53889	6.74017	4.46853	2.83798	3.15668	2.34074	2.63833	4.75097	4.99635	5.66116	7.63437	7.39231	7.62874	7.63184	7.68335	7.3913	7.52144	7.65007	7.57984	7.52413
0.788	6.61754	6.81917	6.61152	6.38563	6.19918	6.19623	6.40338	6.79972	6.5392	6.74032	4.471	2.83858	3.15744	2.34127	2.63954	4.75359	4.99869	5.66336	7.63423	7.39217	7.62859	7.6317	7.6832	7.39115	7.52128	7.64992	7.57971	7.52398
0.789	6.61779	6.81932	6.61183	6.38605	6.19969	6.19694	6.40391	6.79984	6.5395	6.74047	4.47347	2.83918	3.1582	2.34181	2.64076	4.7562	5.00103	5.66556	7.63408	7.39204	7.62845	7.63156	7.68306	7.39101	7.52112	7.64978	7.57958	7.52383
0.79	6.61804	6.81946	6.61213	6.38646	6.20019	6.19765	6.40442	6.79995	6.5398	6.74061	4.47593	2.83978	3.15896	2.34234	2.64197	4.75881	5.00336	5.66774	7.63393	7.3919	7.6283	7.63142	7.68291	7.39087	7.52096	7.64963	7.57944	7.52368
0.791	6.61829	6.8196	6.61244	6.38688	6.2007	6.19835	6.40494	6.80007	6.54009	6.74075	4.4784	2.84038	3.15972	2.34287	2.64318	4.76142	5.00569	5.66992	7.63379	7.39176	7.62815	7.63128	7.68276	7.39072	7.5208	7.64949	7.57931	7.52352
0.792	6.61853	6.81973	6.61274	6.38728	6.20119	6.19905	6.40545	6.80018	6.54038	6.74089	4.48086	2.84098	3.16048	2.34341	2.64439	4.76403	5.00802	5.67208	7.63364	7.39163	7.628	7.63114	7.68261	7.39057	7.52063	7.64934	7.57917	7.52337
0.793	6.61877	6.81987	6.61303	6.38769	6.20169	6.19974	6.40595	6.80029	6.54067	6.74102	4.48332	2.84158	3.16124	2.34394	2.6456	4.76664	5.01035	5.67423	7.63349	7.39149	7.62785	7.63099	7.68247	7.39043	7.52047	7.64919	7.57903	7.52321
0.794	6.61901	6.82	6.61333	6.38809	6.20218	6.20043	6.40646	6.8004	6.54096	6.74116	4.48579	2.84218	3.162	2.34447	2.64682	4.76924	5.01267	5.67638	7.63334	7.39135	7.6277	7.63085	7.68232	7.39028	7.5203	7.64904	7.5789	7.52305
0.795	6.61925	6.82014	6.61362	6.38849	6.20266	6.20111	6.40695	6.80051	6.54125	6.74129	4.48825	2.84278	3.16277	2.34501	2.64803	4.77184	5.01499	5.67851	7.63319	7.39121	7.62755	7.63071	7.68217	7.39013	7.52014	7.64889	7.57876	7.5229
0.796	6.61948	6.82027	6.61391	6.38889	6.20314	6.20178	6.40745	6.80062	6.54153	6.74142	4.49071	2.84338	3.16353	2.34554	2.64924	4.77445	5.0173	5.68063	7.63304	7.39106	7.6274	7.63056	7.68202	7.38998	7.51997	7.64874	7.57862	7.52274
0.797	6.61971	6.82039	6.6142	6.38928	6.20361	6.20245	6.40794	6.80072	6.54181	6.74155	4.49317	2.84398	3.16429	2.34608	2.65045	4.77704	5.01962	5.68274	7.63289	7.39092	7.62725	7.63041	7.68186	7.38983	7.5198	7.64859	7.57848	7.52258
0.798	6.61994	6.82052	6.61449	6.38967	6.20408	6.20311	6.40842	6.80082	6.54208	6.74167	4.49563	2.84458	3.16505	2.34661	2.65167	4.77964	5.02192	5.68485	7.63273	7.39078	7.6271	7.63027	7.68171	7.38967	7.51963	7.64844	7.57834	7.52242
0.799	6.62017	6.82065	6.61477	6.39005	6.20455	6.20377	6.4089	6.80092	6.54236	6.7418	4.49809	2.84518	3.16581	2.34715	2.65288	4.78224	5.02423	5.68694	7.63258	7.39063	7.62694	7.63012	7.68156	7.38952	7.51946	7.64829	7.57819	7.52226
0.8	6.62039	6.82077	6.61505	6.39043	6.20501	6.20442	6.40938	6.80102	6.54263	6.74192	4.50054	2.84578	3.16657	2.34768	2.65409	4.78483	5.02653	5.68902	7.63242	7.39049	7.62679	7.62997	7.6814	7.38937	7.51929	7.64813	7.57805	7.52209
0.801	6.62062	6.82089	6.61533	6.39081	6.20547	6.20507	6.40986	6.80112	6.54289	6.74204	4.503	2.84638	3.16733	2.34821	2.6553	4.78742	5.02883	5.6911	7.63227	7.39034	7.62663	7.62982	7.68125	7.38921	7.51912	7.64798	7.57791	7.52193
0.802	6.62084	6.82101	6.6156	6.39118	6.20592	6.20571	6.41033	6.80121	6.54316	6.74216	4.50546	2.84698	3.16809	2.34875	2.65651	4.79001	5.03112	5.69316	7.63211	7.39019	7.62647	7.62967	7.68109	7.38905	7.51895	7.64782	7.57776	7.52177
0.803	6.62105	6.82113	6.61588	6.39155	6.20637	6.20634	6.41079	6.80131	6.54342	6.74227	4.50791	2.84758	3.16885	2.34928	2.65773	4.7926	5.03341	5.69521	7.63195	7.39004	7.62632	7.62952	7.68094	7.3889	7.51877	7.64767	7.57762	7.5216
0.804	6.62127	6.82124	6.61615	6.39192	6.20682	6.20697	6.41126	6.8014	6.54368	6.74239	4.51036	2.84819	3.16961	2.34982	2.65894	4.79519	5.0357	5.69725	7.63179	7.38989	7.62616	7.62937	7.68078	7.38874	7.5186	7.64751	7.57747	7.52143
0.805	6.62148	6.82136	6.61642	6.39229	6.20726	6.2076	6.41171	6.80149	6.54394	6.7425	4.51282	2.84879	3.17037	2.35035	2.66015	4.79777	5.03798	5.69928	7.63164	7.38974	7.626	7.62921	7.68062	7.38858	7.51842	7.64735	7.57732	7.52127
0.806	6.6217	6.82147	6.61668	6.39265	6.20769	6.20822	6.41217	6.80158	6.54419	6.74261	4.51527	2.84939	3.17113	2.35089	2.66136	4.80035	5.04026	5.70131	7.63148	7.38959	7.62584	7.62906	7.68046	7.38842	7.51825	7.64719	7.57717	7.5211
0.807	6.6219	6.82158	6.61695	6.393	6.20813	6.20883	6.41262	6.80166	6.54444	6.74272	4.51772	2.84999	3.1719	2.35142	2.66258	4.80293	5.04253	5.70332	7.63131	7.38944	7.62568	7.62891	7.6803	7.38826	7.51807	7.64703	7.57702	7.52093
0.808	6.62211	6.82169	6.61721	6.39336	6.20855	6.20944	6.41307	6.80175	6.54469	6.74282	4.52017	2.85059	3.17266	2.35196	2.66379	4.80551	5.04481	5.70532	7.63115	7.38929	7.62552	7.62875	7.68014	7.3881	7.51789	7.64687	7.57687	7.52076
0.809	6.62232	6.82179	6.61747	6.39371	6.20898	6.21004	6.41351	6.80183	6.54493	6.74293	4.52262	2.85119	3.17342	2.35249	2.665	4.80809	5.04707	5.70731	7.63099	7.38913	7.62536	7.6286	7.67998	7.38794	7.51771	7.64671	7.57672	7.52059
0.81	6.62252	6.8219	6.61772	6.39406	6.2094	6.21064	6.41395	6.80191	6.54518	6.74303	4.52507	2.85179	3.17418	2.35303	2.66621	4.81066	5.04934	5.70929	7.63083	7.38898	7.62519	7.62844	7.67982	7.38777	7.51753	7.64655	7.57657	7.52042
0.811	6.62272	6.822	6.61798	6.3944	6.20981	6.21123	6.41439	6.80199	6.54542	6.74313	4.52752	2.85239	3.17494	2.35356	2.66743	4.81323	5.0516	5.71127	7.63066	7.38882	7.62503	7.62828	7.67965	7.38761	7.51735	7.64639	7.57642	7.52025
0.812	6.62292	6.8221	6.61823	6.39474	6.21022	6.21182	6.41482	6.80207	6.54565	6.74323	4.52996	2.85299	3.1757	2.3541	2.66864	4.8158	5.05386	5.71323	7.6305	7.38867	7.62486	7.62812	7.67949	7.38744	7.51717	7.64622	7.57627	7.52008
0.813	6.62312	6.8222	6.61848	6.39508	6.21063	6.2124	6.41525	6.80214	6.54589	6.74332	4.53241	2.85359	3.17646	2.35463	2.66985	4.81837	5.05611	5.71518	7.63033	7.38851	7.6247	7.62796	7.67932	7.38728	7.51699	7.64606	7.57611	7.5199
0.814	6.62331	6.8223	6.61873	6.39542	6.21104	6.21298	6.41567	6.80222	6.54612	6.74342	4.53485	2.8542	3.17722	2.35517	2.67106	4.82094	5.05836	5.71712	7.63017	7.38835	7.62453	7.6278	7.67916	7.38711	7.51681	7.64589	7.57596	7.51973
0.815	6.6235	6.8224	6.61897	6.39575	6.21144	6.21355	6.41609	6.80229	6.54635	6.74351	4.5373	2.8548	3.17798	2.3557	2.67227	4.8235	5.06061	5.71906	7.63	7.38819	7.62436	7.62764	7.67899	7.38694	7.51662	7.64573	7.5758	7.51955
0.816	6.62369	6.82249	6.61921	6.39608	6.21183	6.21412	6.41651	6.80236	6.54658	6.7436	4.53974	2.8554	3.17875	2.35624	2.67349	4.82607	5.06285	5.72098	7.62983	7.38803	7.6242	7.62748	7.67883	7.38677	7.51644	7.64556	7.57565	7.51938
0.817	6.62388	6.82259	6.61945	6.3964	6.21222	6.21468	6.41693	6.80243	6.5468	6.74369	4.54218	2.856	3.17951	2.35677	2.6747	4.82863	5.06509	5.72289	7.62966	7.38787	7.62403	7.62732	7.67866	7.3866	7.51625	7.64539	7.57549	7.5192
0.818	6.62407	6.82268	6.61969	6.39672	6.21261	6.21523	6.41734	6.8025	6.54703	6.74378	4.54462	2.8566	3.18027	2.35731	2.67591	4.83118	5.06733	5.72479	7.62949	7.38771	7.62386	7.62715	7.67849	7.38643	7.51607	7.64523	7.57533	7.51902
0.819	6.62425	6.82277	6.61993	6.39704	6.213	6.21579	6.41775	6.80256	6.54725	6.74386	4.54706	2.8572	3.18103	2.35784	2.67712	4.83374	5.06956	5.72669	7.62932	7.38754	7.62369	7.62699	7.67832	7.38626	7.51588	7.64506	7.57517	7.51884
0.82	6.62443	6.82286	6.62016	6.39736	6.21338	6.21633	6.41815	6.80263	6.54746	6.74395	4.5495	2.8578	3.18179	2.35838	2.67834	4.83629	5.07178	5.72857	7.62915	7.38738	7.62352	7.62683	7.67815	7.38609	7.51569	7.64489	7.57501	7.51866
0.821	6.62461	6.82294	6.62039	6.39767	6.21375	6.21688	6.41855	6.80269	6.54768	6.74403	4.55194	2.85841	3.18255	2.35891	2.67955	4.83885	5.07401	5.73044	7.62898	7.38721	7.62334	7.62666	7.67798	7.38592	7.5155	7.64472	7.57485	7.51848
0.822	6.62479	6.82303	6.62062	6.39798	6.21412	6.21741	6.41895	6.80275	6.54789	6.74411	4.55438	2.85901	3.18331	2.35945	2.68076	4.8414	5.07623	5.73231	7.62881	7.38705	7.62317	7.62649	7.67781	7.38574	7.51531	7.64454	7.57469	7.5183
0.823	6.62497	6.82311	6.62085	6.39829	6.21449	6.21795	6.41934	6.80281	6.5481	6.74419	4.55682	2.85961	3.18407	2.35998	2.68197	4.84394	5.07844	5.73416	7.62863	7.38688	7.623	7.62633	7.67764	7.38557	7.51512	7.64437	7.57453	7.51812
0.824	6.62514	6.82319	6.62107	6.39859	6.21486	6.21847	6.41973	6.80287	6.54831	6.74426	4.55925	2.86021	3.18484	2.36052	2.68319	4.84649	5.08066	5.736	7.62846	7.38671	7.62282	7.62616	7.67746	7.38539	7.51493	7.6442	7.57437	7.51794
0.825	6.62531	6.82327	6.6213	6.39889	6.21522	6.219	6.42012	6.80292	6.54851	6.74434	4.56169	2.86081	3.1856	2.36105	2.6844	4.84903	5.08286	5.73784	7.62828	7.38654	7.62265	7.62599	7.67729	7.38521	7.51474	7.64403	7.5742	7.51775
0.826	6.62548	6.82335	6.62152	6.39919	6.21558	6.21952	6.4205	6.80298	6.54871	6.74441	4.56412	2.86141	3.18636	2.36159	2.68561	4.85157	5.08507	5.73966	7.62811	7.38638	7.62247	7.62582	7.67711	7.38504	7.51455	7.64385	7.57404	7.51757
0.827	6.62565	6.82343	6.62174	6.39949	6.21593	6.22003	6.42088	6.80303	6.54891	6.74448	4.56655	2.86201	3.18712	2.36213	2.68682	4.85411	5.08727	5.74148	7.62793	7.38621	7.6223	7.62565	7.67694	7.38486	7.51435	7.64368	7.57387	7.51738
0.828	6.62581	6.8235	6.62195	6.39978	6.21628	6.22054	6.42126	6.80308	6.54911	6.74455	4.56898	2.86262	3.18788	2.36266	2.68804	4.85665	5.08947	5.74328	7.62775	7.38603	7.62212	7.62548	7.67676	7.38468	7.51416	7.6435	7.57371	7.5172
0.829	6.62598	6.82358	6.62217	6.40007	6.21663	6.22104	6.42163	6.80313	6.54931	6.74462	4.57141	2.86322	3.18864	2.3632	2.68925	4.85919	5.09166	5.74508	7.62758	7.38586	7.62194	7.62531	7.67659	7.3845	7.51396	7.64332	7.57354	7.51701
0.83	6.62614	6.82365	6.62238	6.40036	6.21697	6.22154	6.422	6.80318	6.5495	6.74469	4.57384	2.86382	3.1894	2.36373	2.69046	4.86172	5.09385	5.74687	7.6274	7.38569	7.62176	7.62514	7.67641	7.38432	7.51377	7.64315	7.57337	7.51682
0.831	6.6263	6.82372	6.62259	6.40064	6.21731	6.22204	6.42237	6.80323	6.54969	6.74475	4.57627	2.86442	3.19016	2.36427	2.69167	4.86425	5.09603	5.74864	7.62722	7.38552	7.62158	7.62496	7.67623	7.38414	7.51357	7.64297	7.57321	7.51663
0.832	6.62646	6.82379	6.6228	6.40092	6.21765	6.22253	6.42273	6.80327	6.54988	6.74481	4.5787	2.86502	3.19093	2.3648	2.69288	4.86678	5.09821	5.75041	7.62704	7.38534	7.6214	7.62479	7.67605	7.38395	7.51337	7.64279	7.57304	7.51644
0.833	6.62661	6.82386	6.623	6.4012	6.21798	6.22302	6.4231	6.80331	6.55006	6.74487	4.58113	2.86562	3.19169	2.36534	2.6941	4.8693	5.10039	5.75217	7.62686	7.38517	7.62122	7.62461	7.67587	7.38377	7.51317	7.64261	7.57287	7.51625
0.834	6.62677	6.82392	6.62321	6.40147	6.21831	6.2235	6.42345	6.80336	6.55025	6.74493	4.58355	2.86623	3.19245	2.36588	2.69531	4.87183	5.10257	5.75391	7.62668	7.38499	7.62104	7.62444	7.67569	7.38358	7.51297	7.64243	7.5727	7.51606
0.835	6.62692	6.82399	6.62341	6.40174	6.21863	6.22398	6.42381	6.8034	6.55043	6.74499	4.58598	2.86683	3.19321	2.36641	2.69652	4.87435	5.10473	5.75565	7.62649	7.38481	7.62086	7.62426	7.67551	7.3834	7.51277	7.64225	7.57253	7.51587
0.836	6.62707	6.82405	6.62361	6.40201	6.21895	6.22445	6.42416	6.80343	6.55061	6.74504	4.5884	2.86743	3.19397	2.36695	2.69773	4.87687	5.1069	5.75738	7.62631	7.38464	7.62068	7.62409	7.67533	7.38321	7.51257	7.64207	7.57235	7.51568
0.837	6.62722	6.82411	6.62381	6.40228	6.21927	6.22492	6.42451	6.80347	6.55078	6.7451	4.59082	2.86803	3.19473	2.36748	2.69895	4.87939	5.10906	5.7591	7.62613	7.38446	7.62049	7.62391	7.67515	7.38303	7.51237	7.64189	7.57218	7.51549
0.838	6.62736	6.82417	6.624	6.40254	6.21959	6.22539	6.42485	6.80351	6.55096	6.74515	4.59325	2.86863	3.19549	2.36802	2.70016	4.8819	5.11122	5.76081	7.62594	7.38428	7.62031	7.62373	7.67496	7.38284	7.51217	7.6417	7.57201	7.51529
0.839	6.62751	6.82423	6.6242	6.40281	6.2199	6.22585	6.42519	6.80354	6.55113	6.7452	4.59567	2.86924	3.19626	2.36856	2.70137	4.88441	5.11337	5.76251	7.62576	7.3841	7.62012	7.62355	7.67478	7.38265	7.51196	7.64152	7.57183	7.5151
0.84	6.62765	6.82428	6.62439	6.40306	6.22021	6.2263	6.42553	6.80357	6.5513	6.74525	4.59809	2.86984	3.19702	2.36909	2.70258	4.88692	5.11552	5.7642	7.62557	7.38392	7.61994	7.62337	7.67459	7.38246	7.51176	7.64133	7.57166	7.5149
0.841	6.62779	6.82434	6.62458	6.40332	6.22051	6.22676	6.42587	6.8036	6.55147	6.7453	4.6005	2.87044	3.19778	2.36963	2.7038	4.88943	5.11767	5.76588	7.62538	7.38373	7.61975	7.62319	7.67441	7.38227	7.51155	7.64115	7.57148	7.5147
0.842	6.62793	6.82439	6.62476	6.40357	6.22081	6.2272	6.4262	6.80363	6.55163	6.74534	4.60292	2.87104	3.19854	2.37016	2.70501	4.89194	5.11981	5.76756	7.62519	7.38355	7.61956	7.62301	7.67422	7.38208	7.51135	7.64096	7.57131	7.51451
0.843	6.62807	6.82444	6.62495	6.40382	6.22111	6.22765	6.42653	6.80366	6.55179	6.74539	4.60534	2.87164	3.1993	2.3707	2.70622	4.89444	5.12194	5.76922	7.62501	7.38337	7.61937	7.62283	7.67404	7.38189	7.51114	7.64077	7.57113	7.51431
0.844	6.6282	6.82449	6.62513	6.40407	6.2214	6.22809	6.42685	6.80369	6.55195	6.74543	4.60775	2.87225	3.20006	2.37124	2.70743	4.89694	5.12408	5.77087	7.62482	7.38318	7.61918	7.62264	7.67385	7.3817	7.51093	7.64059	7.57095	7.51411
0.845	6.62834	6.82454	6.62531	6.40431	6.2217	6.22852	6.42718	6.80371	6.55211	6.74547	4.61017	2.87285	3.20082	2.37177	2.70865	4.89944	5.12621	5.77252	7.62463	7.383	7.61899	7.62246	7.67366	7.3815	7.51073	7.6404	7.57077	7.51391
0.846	6.62847	6.82459	6.62549	6.40456	6.22198	6.22895	6.4275	6.80374	6.55227	6.74551	4.61258	2.87345	3.20159	2.37231	2.70986	4.90194	5.12833	5.77415	7.62444	7.38281	7.6188	7.62228	7.67347	7.38131	7.51052	7.64021	7.57059	7.51371
0.847	6.6286	6.82464	6.62567	6.4048	6.22227	6.22938	6.42782	6.80376	6.55242	6.74554	4.61499	2.87405	3.20235	2.37285	2.71107	4.90443	5.13045	5.77578	7.62425	7.38263	7.61861	7.62209	7.67328	7.38111	7.51031	7.64002	7.57041	7.51351
0.848	6.62873	6.82468	6.62585	6.40503	6.22255	6.2298	6.42813	6.80378	6.55257	6.74558	4.6174	2.87466	3.20311	2.37338	2.71228	4.90692	5.13257	5.7774	7.62405	7.38244	7.61842	7.62191	7.67309	7.38092	7.5101	7.63983	7.57023	7.51331
0.849	6.62885	6.82472	6.62602	6.40527	6.22283	6.23022	6.42844	6.8038	6.55272	6.74561	4.61981	2.87526	3.20387	2.37392	2.71349	4.90941	5.13468	5.77901	7.62386	7.38225	7.61823	7.62172	7.6729	7.38072	7.50989	7.63964	7.57005	7.51311
0.85	6.62898	6.82476	6.62619	6.4055	6.2231	6.23064	6.42875	6.80381	6.55287	6.74565	4.62222	2.87586	3.20463	2.37446	2.71471	4.9119	5.13679	5.7806	7.62367	7.38206	7.61803	7.62153	7.67271	7.38052	7.50967	7.63945	7.56987	7.5129
0.851	6.6291	6.8248	6.62636	6.40573	6.22337	6.23105	6.42906	6.80383	6.55301	6.74568	4.62463	2.87646	3.20539	2.37499	2.71592	4.91438	5.13889	5.78219	7.62347	7.38187	7.61784	7.62135	7.67252	7.38032	7.50946	7.63925	7.56969	7.5127
0.852	6.62922	6.82484	6.62653	6.40595	6.22364	6.23145	6.42936	6.80385	6.55316	6.74571	4.62704	2.87707	3.20615	2.37553	2.71713	4.91686	5.14099	5.78378	7.62328	7.38168	7.61765	7.62116	7.67232	7.38013	7.50925	7.63906	7.5695	7.51249
0.853	6.62934	6.82488	6.6267	6.40618	6.22391	6.23186	6.42966	6.80386	6.5533	6.74573	4.62944	2.87767	3.20692	2.37607	2.71834	4.91934	5.14309	5.78535	7.62308	7.38149	7.61745	7.62097	7.67213	7.37993	7.50903	7.63887	7.56932	7.51229
0.854	6.62946	6.82492	6.62686	6.4064	6.22417	6.23226	6.42996	6.80387	6.55344	6.74576	4.63185	2.87827	3.20768	2.3766	2.71956	4.92182	5.14518	5.78691	7.62289	7.3813	7.61725	7.62078	7.67193	7.37973	7.50882	7.63867	7.56913	7.51208
0.855	6.62958	6.82495	6.62702	6.40662	6.22443	6.23265	6.43025	6.80388	6.55357	6.74578	4.63425	2.87887	3.20844	2.37714	2.72077	4.92429	5.14727	5.78846	7.62269	7.3811	7.61706	7.62059	7.67174	7.37952	7.5086	7.63848	7.56895	7.51188
0.856	6.62969	6.82498	6.62719	6.40683	6.22468	6.23304	6.43054	6.80389	6.55371	6.74581	4.63665	2.87948	3.2092	2.37768	2.72198	4.92677	5.14935	5.79001	7.62249	7.38091	7.61686	7.6204	7.67154	7.37932	7.50839	7.63828	7.56876	7.51167
0.857	6.6298	6.82501	6.62734	6.40705	6.22494	6.23343	6.43083	6.8039	6.55384	6.74583	4.63905	2.88008	3.20996	2.37821	2.72319	4.92924	5.15143	5.79154	7.62229	7.38071	7.61666	7.62021	7.67135	7.37912	7.50817	7.63809	7.56857	7.51146
0.858	6.62991	6.82504	6.6275	6.40726	6.22519	6.23381	6.43111	6.8039	6.55397	6.74585	4.64145	2.88068	3.21072	2.37875	2.72441	4.9317	5.1535	5.79307	7.6221	7.38052	7.61646	7.62001	7.67115	7.37892	7.50795	7.63789	7.56839	7.51125
0.859	6.63002	6.82507	6.62766	6.40747	6.22543	6.23419	6.4314	6.80391	6.5541	6.74587	4.64385	2.88128	3.21149	2.37929	2.72562	4.93417	5.15557	5.79459	7.6219	7.38032	7.61626	7.61982	7.67095	7.37871	7.50773	7.63769	7.5682	7.51104
0.86	6.63013	6.8251	6.62781	6.40767	6.22568	6.23457	6.43168	6.80391	6.55423	6.74588	4.64625	2.88189	3.21225	2.37982	2.72683	4.93663	5.15764	5.7961	7.6217	7.38013	7.61606	7.61963	7.67075	7.37851	7.50751	7.63749	7.56801	7.51083
0.861	6.63023	6.82513	6.62796	6.40788	6.22592	6.23494	6.43195	6.80391	6.55435	6.7459	4.64864	2.88249	3.21301	2.38036	2.72804	4.93909	5.1597	5.7976	7.62149	7.37993	7.61586	7.61943	7.67055	7.3783	7.50729	7.63729	7.56782	7.51062
0.862	6.63034	6.82515	6.62811	6.40808	6.22616	6.23531	6.43223	6.80391	6.55447	6.74591	4.65104	2.88309	3.21377	2.3809	2.72925	4.94155	5.16176	5.79909	7.62129	7.37973	7.61566	7.61924	7.67035	7.37809	7.50707	7.63709	7.56763	7.51041
0.863	6.63044	6.82517	6.62826	6.40828	6.22639	6.23568	6.4325	6.80391	6.55459	6.74593	4.65343	2.88369	3.21453	2.38143	2.73047	4.944	5.16381	5.80057	7.62109	7.37953	7.61546	7.61904	7.67015	7.37789	7.50685	7.63689	7.56744	7.51019
0.864	6.63054	6.8252	6.6284	6.40847	6.22662	6.23604	6.43277	6.80391	6.55471	6.74594	4.65583	2.8843	3.21529	2.38197	2.73168	4.94645	5.16586	5.80205	7.62089	7.37933	7.61526	7.61884	7.66995	7.37768	7.50663	7.63669	7.56724	7.50998
0.865	6.63064	6.82522	6.62855	6.40867	6.22685	6.2364	6.43304	6.80391	6.55483	6.74595	4.65822	2.8849	3.21605	2.38251	2.73289	4.9489	5.1679	5.80352	7.62068	7.37913	7.61505	7.61865	7.66975	7.37747	7.50641	7.63649	7.56705	7.50976
0.866	6.63074	6.82523	6.62869	6.40886	6.22708	6.23675	6.4333	6.8039	6.55494	6.74595	4.66061	2.8855	3.21682	2.38304	2.7341	4.95135	5.16994	5.80497	7.62048	7.37893	7.61485	7.61845	7.66955	7.37726	7.50618	7.63628	7.56686	7.50955
0.867	6.63083	6.82525	6.62883	6.40905	6.2273	6.2371	6.43356	6.8039	6.55505	6.74596	4.663	2.8861	3.21758	2.38358	2.73532	4.95379	5.17198	5.80642	7.62027	7.37872	7.61464	7.61825	7.66935	7.37705	7.50596	7.63608	7.56666	7.50933
0.868	6.63092	6.82527	6.62897	6.40923	6.22752	6.23745	6.43382	6.80389	6.55516	6.74596	4.66538	2.88671	3.21834	2.38412	2.73653	4.95624	5.17401	5.80786	7.62007	7.37852	7.61444	7.61805	7.66914	7.37684	7.50573	7.63588	7.56647	7.50912
0.869	6.63102	6.82528	6.62911	6.40942	6.22774	6.23779	6.43408	6.80388	6.55527	6.74597	4.66777	2.88731	3.2191	2.38466	2.73774	4.95867	5.17604	5.80929	7.61986	7.37832	7.61423	7.61785	7.66894	7.37662	7.50551	7.63567	7.56627	7.5089
0.87	6.63111	6.8253	6.62924	6.4096	6.22795	6.23813	6.43433	6.80387	6.55538	6.74597	4.67016	2.88791	3.21986	2.38519	2.73895	4.96111	5.17806	5.81072	7.61966	7.37811	7.61402	7.61765	7.66873	7.37641	7.50528	7.63547	7.56608	7.50868
0.871	6.6312	6.82531	6.62938	6.40978	6.22816	6.23847	6.43458	6.80386	6.55548	6.74597	4.67254	2.88852	3.22062	2.38573	2.74016	4.96354	5.18008	5.81213	7.61945	7.37791	7.61382	7.61745	7.66853	7.3762	7.50505	7.63526	7.56588	7.50846
0.872	6.63128	6.82532	6.62951	6.40996	6.22837	6.2388	6.43483	6.80384	6.55558	6.74597	4.67492	2.88912	3.22139	2.38627	2.74138	4.96598	5.18209	5.81354	7.61924	7.3777	7.61361	7.61725	7.66832	7.37598	7.50482	7.63505	7.56568	7.50825
0.873	6.63137	6.82533	6.62964	6.41013	6.22858	6.23913	6.43507	6.80383	6.55568	6.74597	4.67731	2.88972	3.22215	2.3868	2.74259	4.9684	5.1841	5.81493	7.61903	7.37749	7.6134	7.61704	7.66811	7.37577	7.5046	7.63485	7.56548	7.50803
0.874	6.63145	6.82534	6.62977	6.4103	6.22878	6.23945	6.43532	6.80381	6.55578	6.74596	4.67969	2.89032	3.22291	2.38734	2.7438	4.97083	5.18611	5.81632	7.61882	7.37729	7.61319	7.61684	7.66791	7.37555	7.50437	7.63464	7.56529	7.5078
0.875	6.63154	6.82534	6.62989	6.41048	6.22898	6.23978	6.43556	6.8038	6.55588	6.74596	4.68207	2.89093	3.22367	2.38788	2.74501	4.97325	5.18811	5.8177	7.61861	7.37708	7.61298	7.61664	7.6677	7.37534	7.50414	7.63443	7.56509	7.50758
0.876	6.63162	6.82535	6.63002	6.41064	6.22917	6.2401	6.43579	6.80378	6.55597	6.74595	4.68444	2.89153	3.22443	2.38842	2.74623	4.97567	5.1901	5.81908	7.6184	7.37687	7.61277	7.61643	7.66749	7.37512	7.50391	7.63422	7.56489	7.50736
0.877	6.6317	6.82535	6.63014	6.41081	6.22937	6.24041	6.43603	6.80376	6.55606	6.74594	4.68682	2.89213	3.22519	2.38895	2.74744	4.97809	5.1921	5.82044	7.61819	7.37666	7.61256	7.61623	7.66728	7.3749	7.50367	7.63401	7.56468	7.50714
0.878	6.63177	6.82536	6.63026	6.41097	6.22956	6.24072	6.43626	6.80374	6.55615	6.74593	4.6892	2.89274	3.22596	2.38949	2.74865	4.9805	5.19408	5.8218	7.61798	7.37645	7.61234	7.61602	7.66707	7.37468	7.50344	7.6338	7.56448	7.50691
0.879	6.63185	6.82536	6.63038	6.41113	6.22975	6.24103	6.43649	6.80372	6.55624	6.74592	4.69157	2.89334	3.22672	2.39003	2.74986	4.98292	5.19607	5.82315	7.61776	7.37624	7.61213	7.61581	7.66686	7.37446	7.50321	7.63359	7.56428	7.50669
0.88	6.63192	6.82536	6.6305	6.41129	6.22994	6.24134	6.43672	6.80369	6.55633	6.74591	4.69394	2.89394	3.22748	2.39057	2.75107	4.98533	5.19804	5.82449	7.61755	7.37603	7.61192	7.61561	7.66665	7.37424	7.50298	7.63338	7.56408	7.50647
0.881	6.632	6.82536	6.63062	6.41145	6.23012	6.24164	6.43694	6.80367	6.55641	6.74589	4.69632	2.89454	3.22824	2.3911	2.75229	4.98773	5.20002	5.82582	7.61733	7.37581	7.6117	7.6154	7.66643	7.37402	7.50274	7.63317	7.56387	7.50624
0.882	6.63207	6.82536	6.63073	6.4116	6.2303	6.24194	6.43717	6.80364	6.5565	6.74588	4.69869	2.89515	3.229	2.39164	2.7535	4.99014	5.20199	5.82714	7.61712	7.3756	7.61149	7.61519	7.66622	7.3738	7.50251	7.63295	7.56367	7.50601
0.883	6.63214	6.82535	6.63085	6.41176	6.23048	6.24223	6.43739	6.80361	6.55658	6.74586	4.70106	2.89575	3.22976	2.39218	2.75471	4.99254	5.20395	5.82846	7.6169	7.37539	7.61127	7.61498	7.66601	7.37358	7.50227	7.63274	7.56347	7.50579
0.884	6.63221	6.82535	6.63096	6.41191	6.23065	6.24253	6.4376	6.80358	6.55666	6.74584	4.70342	2.89635	3.23053	2.39272	2.75592	4.99494	5.20591	5.82976	7.61669	7.37517	7.61106	7.61477	7.66579	7.37336	7.50203	7.63252	7.56326	7.50556
0.885	6.63227	6.82534	6.63107	6.41206	6.23083	6.24282	6.43782	6.80355	6.55673	6.74582	4.70579	2.89696	3.23129	2.39325	2.75714	4.99733	5.20787	5.83106	7.61647	7.37496	7.61084	7.61456	7.66558	7.37313	7.5018	7.63231	7.56305	7.50533
0.886	6.63234	6.82533	6.63118	6.4122	6.231	6.2431	6.43803	6.80352	6.55681	6.7458	4.70816	2.89756	3.23205	2.39379	2.75835	4.99972	5.20982	5.83236	7.61625	7.37474	7.61062	7.61435	7.66536	7.37291	7.50156	7.63209	7.56285	7.5051
0.887	6.6324	6.82533	6.63128	6.41235	6.23116	6.24338	6.43824	6.80349	6.55688	6.74578	4.71052	2.89816	3.23281	2.39433	2.75956	5.00211	5.21177	5.83364	7.61604	7.37452	7.6104	7.61414	7.66515	7.37268	7.50132	7.63188	7.56264	7.50487
0.888	6.63247	6.82532	6.63139	6.41249	6.23133	6.24366	6.43845	6.80346	6.55696	6.74576	4.71288	2.89877	3.23357	2.39487	2.76077	5.0045	5.21371	5.83492	7.61582	7.3743	7.61019	7.61393	7.66493	7.37246	7.50108	7.63166	7.56243	7.50464
0.889	6.63253	6.82531	6.63149	6.41263	6.23149	6.24394	6.43866	6.80342	6.55703	6.74573	4.71524	2.89937	3.23433	2.3954	2.76198	5.00688	5.21564	5.83618	7.6156	7.37409	7.60997	7.61371	7.66471	7.37223	7.50084	7.63144	7.56222	7.50441
0.89	6.63259	6.82529	6.63159	6.41276	6.23165	6.24421	6.43886	6.80339	6.55709	6.7457	4.7176	2.89997	3.2351	2.39594	2.7632	5.00926	5.21758	5.83744	7.61538	7.37387	7.60975	7.6135	7.6645	7.372	7.5006	7.63122	7.56201	7.50418
0.891	6.63264	6.82528	6.63169	6.4129	6.23181	6.24448	6.43906	6.80335	6.55716	6.74568	4.71996	2.90058	3.23586	2.39648	2.76441	5.01164	5.21951	5.8387	7.61516	7.37365	7.60953	7.61329	7.66428	7.37178	7.50036	7.63101	7.5618	7.50395
0.892	6.6327	6.82526	6.63179	6.41303	6.23196	6.24475	6.43926	6.80331	6.55723	6.74565	4.72232	2.90118	3.23662	2.39702	2.76562	5.01402	5.22143	5.83994	7.61494	7.37343	7.60931	7.61307	7.66406	7.37155	7.50012	7.63079	7.56159	7.50372
0.893	6.63275	6.82525	6.63189	6.41316	6.23211	6.24501	6.43946	6.80327	6.55729	6.74562	4.72468	2.90178	3.23738	2.39756	2.76683	5.01639	5.22335	5.84118	7.61471	7.37321	7.60908	7.61286	7.66384	7.37132	7.49988	7.63057	7.56138	7.50348
0.894	6.63281	6.82523	6.63198	6.41329	6.23226	6.24527	6.43965	6.80323	6.55735	6.74559	4.72703	2.90239	3.23814	2.39809	2.76805	5.01876	5.22526	5.84241	7.61449	7.37298	7.60886	7.61264	7.66362	7.37109	7.49963	7.63035	7.56117	7.50325
0.895	6.63286	6.82521	6.63208	6.41342	6.23241	6.24553	6.43984	6.80319	6.55741	6.74555	4.72938	2.90299	3.2389	2.39863	2.76926	5.02113	5.22717	5.84363	7.61427	7.37276	7.60864	7.61242	7.6634	7.37086	7.49939	7.63013	7.56096	7.50301
0.896	6.63291	6.82519	6.63217	6.41354	6.23255	6.24578	6.44003	6.80314	6.55747	6.74552	4.73174	2.90359	3.23967	2.39917	2.77047	5.02349	5.22908	5.84484	7.61405	7.37254	7.60841	7.61221	7.66318	7.37063	7.49915	7.6299	7.56075	7.50278
0.897	6.63296	6.82517	6.63226	6.41367	6.23269	6.24603	6.44022	6.8031	6.55752	6.74548	4.73409	2.9042	3.24043	2.39971	2.77168	5.02585	5.23098	5.84605	7.61382	7.37231	7.60819	7.61199	7.66296	7.37039	7.4989	7.62968	7.56053	7.50254
0.898	6.63301	6.82515	6.63235	6.41379	6.23283	6.24628	6.4404	6.80305	6.55758	6.74544	4.73643	2.9048	3.24119	2.40025	2.77289	5.02821	5.23287	5.84725	7.6136	7.37209	7.60797	7.61177	7.66273	7.37016	7.49866	7.62946	7.56032	7.50231
0.899	6.63305	6.82513	6.63244	6.41391	6.23297	6.24653	6.44059	6.80301	6.55763	6.74541	4.73878	2.9054	3.24195	2.40078	2.77411	5.03056	5.23476	5.84844	7.61337	7.37186	7.60774	7.61155	7.66251	7.36993	7.49841	7.62923	7.5601	7.50207
0.9	6.6331	6.8251	6.63252	6.41402	6.2331	6.24677	6.44077	6.80296	6.55768	6.74537	4.74113	2.90601	3.24271	2.40132	2.77532	5.03291	5.23665	5.84962	7.61315	7.37164	7.60751	7.61133	7.66229	7.36969	7.49816	7.62901	7.55989	7.50183
0.901	6.63314	6.82508	6.63261	6.41414	6.23324	6.24701	6.44094	6.80291	6.55773	6.74533	4.74347	2.90661	3.24347	2.40186	2.77653	5.03526	5.23853	5.8508	7.61292	7.37141	7.60729	7.61111	7.66206	7.36946	7.49791	7.62879	7.55967	7.50159
0.902	6.63318	6.82505	6.63269	6.41425	6.23337	6.24725	6.44112	6.80286	6.55778	6.74528	4.74582	2.90721	3.24423	2.4024	2.77774	5.03761	5.24041	5.85197	7.61269	7.37118	7.60706	7.61089	7.66184	7.36922	7.49767	7.62856	7.55945	7.50135
0.903	6.63322	6.82502	6.63277	6.41436	6.23349	6.24748	6.44129	6.8028	6.55782	6.74524	4.74816	2.90782	3.245	2.40294	2.77895	5.03995	5.24228	5.85313	7.61246	7.37096	7.60683	7.61067	7.66161	7.36899	7.49742	7.62833	7.55924	7.50111
0.904	6.63326	6.82499	6.63285	6.41447	6.23362	6.24771	6.44146	6.80275	6.55787	6.74519	4.7505	2.90842	3.24576	2.40347	2.78017	5.04229	5.24415	5.85428	7.61224	7.37073	7.6066	7.61045	7.66139	7.36875	7.49717	7.62811	7.55902	7.50087
0.905	6.6333	6.82496	6.63293	6.41457	6.23374	6.24794	6.44163	6.8027	6.55791	6.74515	4.75284	2.90902	3.24652	2.40401	2.78138	5.04463	5.24601	5.85543	7.61201	7.3705	7.60638	7.61023	7.66116	7.36851	7.49692	7.62788	7.5588	7.50063
0.906	6.63334	6.82493	6.63301	6.41468	6.23386	6.24816	6.4418	6.80264	6.55795	6.7451	4.75518	2.90963	3.24728	2.40455	2.78259	5.04696	5.24787	5.85657	7.61178	7.37027	7.60615	7.61	7.66093	7.36828	7.49667	7.62765	7.55858	7.50039
0.907	6.63337	6.8249	6.63309	6.41478	6.23398	6.24838	6.44197	6.80259	6.55799	6.74505	4.75751	2.91023	3.24804	2.40509	2.7838	5.04929	5.24973	5.8577	7.61155	7.37004	7.60592	7.60978	7.66071	7.36804	7.49642	7.62742	7.55836	7.50015
0.908	6.6334	6.82487	6.63316	6.41488	6.23409	6.2486	6.44213	6.80253	6.55803	6.745	4.75985	2.91083	3.2488	2.40563	2.78501	5.05162	5.25157	5.85882	7.61132	7.36981	7.60568	7.60956	7.66048	7.3678	7.49616	7.6272	7.55814	7.4999
0.909	6.63344	6.82483	6.63323	6.41498	6.2342	6.24882	6.44229	6.80247	6.55806	6.74495	4.76218	2.91144	3.24957	2.40616	2.78623	5.05394	5.25342	5.85994	7.61108	7.36957	7.60545	7.60933	7.66025	7.36756	7.49591	7.62697	7.55792	7.49966
0.91	6.63347	6.82479	6.6333	6.41508	6.23431	6.24903	6.44245	6.80241	6.5581	6.7449	4.76451	2.91204	3.25033	2.4067	2.78744	5.05626	5.25526	5.86105	7.61085	7.36934	7.60522	7.6091	7.66002	7.36732	7.49566	7.62674	7.5577	7.49941
0.911	6.6335	6.82476	6.63337	6.41517	6.23442	6.24924	6.4426	6.80235	6.55813	6.74484	4.76684	2.91265	3.25109	2.40724	2.78865	5.05858	5.25709	5.86216	7.61062	7.36911	7.60499	7.60888	7.65979	7.36708	7.4954	7.62651	7.55748	7.49917
0.912	6.63352	6.82472	6.63344	6.41526	6.23453	6.24945	6.44276	6.80229	6.55816	6.74479	4.76917	2.91325	3.25185	2.40778	2.78986	5.0609	5.25892	5.86325	7.61039	7.36887	7.60476	7.60865	7.65956	7.36683	7.49515	7.62627	7.55725	7.49892
0.913	6.63355	6.82468	6.63351	6.41536	6.23463	6.24965	6.44291	6.80222	6.55819	6.74473	4.7715	2.91385	3.25261	2.40832	2.79107	5.06321	5.26075	5.86434	7.61015	7.36864	7.60452	7.60842	7.65933	7.36659	7.49489	7.62604	7.55703	7.49868
0.914	6.63358	6.82464	6.63357	6.41544	6.23473	6.24986	6.44306	6.80216	6.55822	6.74468	4.77382	2.91446	3.25337	2.40886	2.79229	5.06552	5.26257	5.86542	7.60992	7.3684	7.60429	7.6082	7.6591	7.36635	7.49464	7.62581	7.55681	7.49843
0.915	6.6336	6.8246	6.63364	6.41553	6.23483	6.25006	6.44321	6.80209	6.55824	6.74462	4.77615	2.91506	3.25414	2.40939	2.7935	5.06782	5.26438	5.8665	7.60968	7.36817	7.60405	7.60797	7.65886	7.3661	7.49438	7.62558	7.55658	7.49818
0.916	6.63362	6.82455	6.6337	6.41562	6.23493	6.25025	6.44335	6.80202	6.55827	6.74456	4.77847	2.91566	3.2549	2.40993	2.79471	5.07012	5.26619	5.86757	7.60945	7.36793	7.60382	7.60774	7.65863	7.36586	7.49412	7.62534	7.55636	7.49794
0.917	6.63364	6.82451	6.63376	6.4157	6.23502	6.25045	6.4435	6.80196	6.55829	6.7445	4.78079	2.91627	3.25566	2.41047	2.79592	5.07242	5.268	5.86863	7.60921	7.36769	7.60358	7.60751	7.6584	7.36561	7.49387	7.62511	7.55613	7.49769
0.918	6.63366	6.82446	6.63382	6.41578	6.23511	6.25064	6.44364	6.80189	6.55831	6.74443	4.78311	2.91687	3.25642	2.41101	2.79713	5.07472	5.2698	5.86968	7.60898	7.36746	7.60334	7.60728	7.65816	7.36537	7.49361	7.62487	7.55591	7.49744
0.919	6.63368	6.82442	6.63388	6.41586	6.2352	6.25083	6.44378	6.80182	6.55833	6.74437	4.78543	2.91747	3.25718	2.41155	2.79835	5.07701	5.2716	5.87073	7.60874	7.36722	7.60311	7.60705	7.65793	7.36512	7.49335	7.62464	7.55568	7.49719
0.92	6.6337	6.82437	6.63394	6.41594	6.23529	6.25101	6.44391	6.80175	6.55835	6.74431	4.78775	2.91808	3.25794	2.41209	2.79956	5.0793	5.27339	5.87177	7.6085	7.36698	7.60287	7.60682	7.65769	7.36487	7.49309	7.6244	7.55545	7.49694
0.921	6.63372	6.82432	6.63399	6.41601	6.23537	6.25119	6.44405	6.80167	6.55836	6.74424	4.79006	2.91868	3.25871	2.41262	2.80077	5.08158	5.27517	5.87281	7.60826	7.36674	7.60263	7.60659	7.65746	7.36463	7.49283	7.62417	7.55522	7.49669
0.922	6.63373	6.82427	6.63405	6.41609	6.23546	6.25137	6.44418	6.8016	6.55838	6.74417	4.79238	2.91929	3.25947	2.41316	2.80198	5.08387	5.27696	5.87384	7.60802	7.3665	7.60239	7.60635	7.65722	7.36438	7.49257	7.62393	7.55499	7.49643
0.923	6.63374	6.82422	6.6341	6.41616	6.23554	6.25155	6.44431	6.80153	6.55839	6.7441	4.79469	2.91989	3.26023	2.4137	2.80319	5.08615	5.27873	5.87486	7.60778	7.36626	7.60215	7.60612	7.65699	7.36413	7.49231	7.62369	7.55477	7.49618
0.924	6.63375	6.82417	6.63415	6.41623	6.23562	6.25173	6.44444	6.80145	6.5584	6.74403	4.797	2.92049	3.26099	2.41424	2.80441	5.08842	5.2805	5.87587	7.60754	7.36601	7.60191	7.60589	7.65675	7.36388	7.49205	7.62345	7.55454	7.49593
0.925	6.63377	6.82412	6.6342	6.4163	6.23569	6.2519	6.44457	6.80137	6.55841	6.74396	4.79931	2.9211	3.26175	2.41478	2.80562	5.09069	5.28227	5.87688	7.6073	7.36577	7.60167	7.60565	7.65651	7.36363	7.49178	7.62322	7.55431	7.49568
0.926	6.63377	6.82406	6.63425	6.41637	6.23577	6.25207	6.4447	6.80129	6.55842	6.74389	4.80161	2.9217	3.26251	2.41532	2.80683	5.09296	5.28403	5.87788	7.60706	7.36553	7.60143	7.60542	7.65627	7.36338	7.49152	7.62298	7.55407	7.49542
0.927	6.63378	6.82401	6.6343	6.41643	6.23584	6.25224	6.44482	6.80122	6.55843	6.74382	4.80392	2.9223	3.26327	2.41586	2.80804	5.09523	5.28579	5.87887	7.60682	7.36529	7.60119	7.60518	7.65603	7.36313	7.49126	7.62274	7.55384	7.49517
0.928	6.63379	6.82395	6.63434	6.41649	6.23591	6.2524	6.44494	6.80114	6.55843	6.74374	4.80622	2.92291	3.26404	2.41639	2.80925	5.09749	5.28754	5.87986	7.60658	7.36504	7.60095	7.60495	7.65579	7.36287	7.49099	7.6225	7.55361	7.49491
0.929	6.6338	6.82389	6.63439	6.41656	6.23598	6.25256	6.44506	6.80105	6.55844	6.74367	4.80853	2.92351	3.2648	2.41693	2.81047	5.09975	5.28929	5.88084	7.60634	7.3648	7.60071	7.60471	7.65555	7.36262	7.49073	7.62226	7.55338	7.49466
0.93	6.6338	6.82384	6.63443	6.41662	6.23604	6.25272	6.44518	6.80097	6.55844	6.74359	4.81083	2.92412	3.26556	2.41747	2.81168	5.10201	5.29103	5.88182	7.60609	7.36455	7.60046	7.60448	7.65531	7.36237	7.49046	7.62201	7.55315	7.4944
0.931	6.6338	6.82378	6.63447	6.41667	6.23611	6.25288	6.44529	6.80089	6.55844	6.74351	4.81313	2.92472	3.26632	2.41801	2.81289	5.10426	5.29277	5.88279	7.60585	7.3643	7.60022	7.60424	7.65507	7.36211	7.4902	7.62177	7.55291	7.49414
0.932	6.6338	6.82372	6.63451	6.41673	6.23617	6.25303	6.44541	6.80081	6.55844	6.74344	4.81542	2.92532	3.26708	2.41855	2.8141	5.10651	5.2945	5.88375	7.6056	7.36406	7.59997	7.604	7.65483	7.36186	7.48993	7.62153	7.55268	7.49388
0.933	6.6338	6.82366	6.63455	6.41678	6.23623	6.25319	6.44552	6.80072	6.55844	6.74336	4.81772	2.92593	3.26784	2.41909	2.81531	5.10875	5.29623	5.8847	7.60536	7.36381	7.59973	7.60376	7.65459	7.3616	7.48966	7.62129	7.55244	7.49363
0.934	6.6338	6.82359	6.63459	6.41684	6.23628	6.25334	6.44563	6.80063	6.55844	6.74327	4.82001	2.92653	3.2686	2.41963	2.81653	5.111	5.29796	5.88565	7.60511	7.36356	7.59948	7.60352	7.65435	7.36135	7.48939	7.62104	7.55221	7.49337
0.935	6.6338	6.82353	6.63462	6.41689	6.23634	6.25348	6.44573	6.80055	6.55843	6.74319	4.82231	2.92714	3.26937	2.42017	2.81774	5.11324	5.29967	5.8866	7.60487	7.36331	7.59924	7.60328	7.6541	7.36109	7.48913	7.6208	7.55197	7.49311
0.936	6.6338	6.82347	6.63466	6.41694	6.23639	6.25363	6.44584	6.80046	6.55842	6.74311	4.8246	2.92774	3.27013	2.4207	2.81895	5.11547	5.30139	5.88753	7.60462	7.36306	7.59899	7.60304	7.65386	7.36084	7.48886	7.62055	7.55173	7.49285
0.937	6.63379	6.8234	6.63469	6.41698	6.23644	6.25377	6.44594	6.80037	6.55842	6.74302	4.82689	2.92834	3.27089	2.42124	2.82016	5.1177	5.3031	5.88847	7.60437	7.36281	7.59874	7.6028	7.65361	7.36058	7.48859	7.62031	7.5515	7.49259
0.938	6.63379	6.82333	6.63473	6.41703	6.23649	6.25391	6.44605	6.80028	6.55841	6.74294	4.82917	2.92895	3.27165	2.42178	2.82137	5.11993	5.3048	5.88939	7.60413	7.36256	7.5985	7.60256	7.65337	7.36032	7.48832	7.62006	7.55126	7.49233
0.939	6.63378	6.82327	6.63476	6.41707	6.23654	6.25405	6.44615	6.80019	6.5584	6.74285	4.83146	2.92955	3.27241	2.42232	2.82258	5.12216	5.3065	5.89031	7.60388	7.36231	7.59825	7.60232	7.65312	7.36006	7.48805	7.61982	7.55102	7.49206
0.94	6.63377	6.8232	6.63479	6.41712	6.23658	6.25418	6.44624	6.80009	6.55838	6.74276	4.83374	2.93016	3.27317	2.42286	2.8238	5.12438	5.30819	5.89122	7.60363	7.36206	7.598	7.60208	7.65288	7.3598	7.48777	7.61957	7.55078	7.4918
0.941	6.63376	6.82313	6.63481	6.41716	6.23663	6.25431	6.44634	6.8	6.55837	6.74267	4.83603	2.93076	3.27394	2.4234	2.82501	5.1266	5.30988	5.89213	7.60338	7.36181	7.59775	7.60183	7.65263	7.35954	7.4875	7.61932	7.55054	7.49154
0.942	6.63375	6.82306	6.63484	6.4172	6.23667	6.25444	6.44644	6.7999	6.55835	6.74258	4.83831	2.93136	3.2747	2.42394	2.82622	5.12881	5.31156	5.89303	7.60313	7.36156	7.5975	7.60159	7.65239	7.35928	7.48723	7.61908	7.5503	7.49128
0.943	6.63374	6.82298	6.63487	6.41723	6.23671	6.25457	6.44653	6.79981	6.55834	6.74249	4.84059	2.93197	3.27546	2.42448	2.82743	5.13102	5.31324	5.89392	7.60288	7.3613	7.59725	7.60135	7.65214	7.35902	7.48696	7.61883	7.55006	7.49101
0.944	6.63373	6.82291	6.63489	6.41727	6.23674	6.2547	6.44662	6.79971	6.55832	6.7424	4.84286	2.93257	3.27622	2.42502	2.82864	5.13323	5.31492	5.89481	7.60263	7.36105	7.597	7.6011	7.65189	7.35876	7.48668	7.61858	7.54982	7.49075
0.945	6.63371	6.82284	6.63492	6.4173	6.23678	6.25482	6.44671	6.79961	6.5583	6.74231	4.84514	2.93318	3.27698	2.42555	2.82985	5.13543	5.31658	5.89569	7.60238	7.36079	7.59675	7.60086	7.65164	7.35849	7.48641	7.61833	7.54958	7.49048
0.946	6.6337	6.82276	6.63494	6.41733	6.23681	6.25494	6.4468	6.79952	6.55828	6.74221	4.84741	2.93378	3.27774	2.42609	2.83107	5.13763	5.31825	5.89657	7.60212	7.36054	7.59649	7.60061	7.65139	7.35823	7.48613	7.61808	7.54934	7.49022
0.947	6.63368	6.82269	6.63496	6.41737	6.23684	6.25506	6.44688	6.79942	6.55826	6.74212	4.84968	2.93438	3.2785	2.42663	2.83228	5.13983	5.31991	5.89744	7.60187	7.36028	7.59624	7.60037	7.65114	7.35797	7.48586	7.61783	7.5491	7.48995
0.948	6.63366	6.82261	6.63498	6.41739	6.23687	6.25517	6.44697	6.79932	6.55823	6.74202	4.85196	2.93499	3.27926	2.42717	2.83349	5.14202	5.32156	5.8983	7.60162	7.36003	7.59599	7.60012	7.65089	7.3577	7.48558	7.61758	7.54885	7.48968
0.949	6.63365	6.82253	6.635	6.41742	6.2369	6.25529	6.44705	6.79921	6.55821	6.74192	4.85422	2.93559	3.28003	2.42771	2.8347	5.14421	5.32321	5.89916	7.60136	7.35977	7.59574	7.59987	7.65064	7.35744	7.48531	7.61733	7.54861	7.48942
0.95	6.63363	6.82245	6.63501	6.41745	6.23692	6.2554	6.44713	6.79911	6.55818	6.74182	4.85649	2.9362	3.28079	2.42825	2.83591	5.1464	5.32485	5.90001	7.60111	7.35951	7.59548	7.59963	7.65039	7.35717	7.48503	7.61707	7.54837	7.48915
0.951	6.6336	6.82237	6.63503	6.41747	6.23694	6.25551	6.44721	6.79901	6.55815	6.74172	4.85876	2.9368	3.28155	2.42879	2.83713	5.14858	5.32649	5.90086	7.60086	7.35925	7.59523	7.59938	7.65014	7.35691	7.48475	7.61682	7.54812	7.48888
0.952	6.63358	6.82229	6.63504	6.41749	6.23697	6.25561	6.44728	6.7989	6.55812	6.74162	4.86102	2.9374	3.28231	2.42933	2.83834	5.15076	5.32813	5.9017	7.6006	7.359	7.59497	7.59913	7.64989	7.35664	7.48447	7.61657	7.54788	7.48861
0.953	6.63356	6.82221	6.63506	6.41751	6.23699	6.25572	6.44736	6.7988	6.55809	6.74152	4.86328	2.93801	3.28307	2.42987	2.83955	5.15293	5.32975	5.90254	7.60035	7.35874	7.59472	7.59888	7.64964	7.35637	7.4842	7.61632	7.54763	7.48834
0.954	6.63353	6.82213	6.63507	6.41753	6.237	6.25582	6.44743	6.79869	6.55806	6.74142	4.86554	2.93861	3.28383	2.43041	2.84076	5.15511	5.33138	5.90337	7.60009	7.35848	7.59446	7.59863	7.64938	7.35611	7.48392	7.61606	7.54739	7.48807
0.955	6.63351	6.82205	6.63508	6.41755	6.23702	6.25592	6.4475	6.79858	6.55803	6.74131	4.8678	2.93922	3.28459	2.43095	2.84197	5.15727	5.333	5.90419	7.59983	7.35822	7.5942	7.59838	7.64913	7.35584	7.48364	7.61581	7.54714	7.4878
0.956	6.63348	6.82196	6.63509	6.41757	6.23703	6.25602	6.44757	6.79847	6.55799	6.74121	4.87005	2.93982	3.28536	2.43148	2.84318	5.15944	5.33461	5.90501	7.59958	7.35796	7.59395	7.59813	7.64887	7.35557	7.48336	7.61555	7.54689	7.48753
0.957	6.63345	6.82188	6.6351	6.41758	6.23704	6.25611	6.44764	6.79836	6.55796	6.7411	4.87231	2.94042	3.28612	2.43202	2.8444	5.1616	5.33622	5.90582	7.59932	7.35769	7.59369	7.59788	7.64862	7.3553	7.48308	7.6153	7.54664	7.48726
0.958	6.63342	6.82179	6.63511	6.41759	6.23705	6.25621	6.44771	6.79825	6.55792	6.74099	4.87456	2.94103	3.28688	2.43256	2.84561	5.16375	5.33782	5.90663	7.59906	7.35743	7.59343	7.59763	7.64837	7.35503	7.48279	7.61504	7.5464	7.48699
0.959	6.63339	6.8217	6.63511	6.41761	6.23706	6.2563	6.44777	6.79814	6.55788	6.74088	4.87681	2.94163	3.28764	2.4331	2.84682	5.16591	5.33942	5.90743	7.5988	7.35717	7.59317	7.59737	7.64811	7.35476	7.48251	7.61478	7.54615	7.48671
0.96	6.63336	6.82161	6.63512	6.41762	6.23707	6.25638	6.44783	6.79803	6.55784	6.74078	4.87906	2.94224	3.2884	2.43364	2.84803	5.16806	5.34102	5.90823	7.59854	7.35691	7.59291	7.59712	7.64785	7.35449	7.48223	7.61453	7.5459	7.48644
0.961	6.63333	6.82152	6.63512	6.41762	6.23707	6.25647	6.44789	6.79792	6.5578	6.74066	4.88131	2.94284	3.28916	2.43418	2.84924	5.1702	5.34261	5.90902	7.59828	7.35664	7.59265	7.59687	7.6476	7.35422	7.48195	7.61427	7.54565	7.48617
0.962	6.63329	6.82143	6.63512	6.41763	6.23707	6.25656	6.44795	6.7978	6.55776	6.74055	4.88355	2.94345	3.28992	2.43472	2.85045	5.17234	5.34419	5.9098	7.59802	7.35638	7.59239	7.59662	7.64734	7.35394	7.48166	7.61401	7.5454	7.48589
0.963	6.63326	6.82134	6.63513	6.41764	6.23707	6.25664	6.44801	6.79769	6.55771	6.74044	4.88579	2.94405	3.29068	2.43526	2.85166	5.17448	5.34577	5.91058	7.59776	7.35611	7.59213	7.59636	7.64708	7.35367	7.48138	7.61375	7.54515	7.48562
0.964	6.63322	6.82125	6.63513	6.41764	6.23707	6.25672	6.44807	6.79757	6.55767	6.74033	4.88803	2.94465	3.29145	2.4358	2.85288	5.17661	5.34734	5.91136	7.5975	7.35585	7.59187	7.59611	7.64682	7.3534	7.48109	7.61349	7.5449	7.48534
0.965	6.63319	6.82116	6.63513	6.41764	6.23707	6.2568	6.44812	6.79745	6.55762	6.74021	4.89027	2.94526	3.29221	2.43634	2.85409	5.17874	5.34891	5.91213	7.59724	7.35558	7.59161	7.59585	7.64657	7.35312	7.48081	7.61323	7.54464	7.48507
0.966	6.63315	6.82106	6.63512	6.41764	6.23706	6.25687	6.44817	6.79734	6.55757	6.7401	4.89251	2.94586	3.29297	2.43688	2.8553	5.18087	5.35047	5.91289	7.59698	7.35531	7.59135	7.5956	7.64631	7.35285	7.48052	7.61297	7.54439	7.48479
0.967	6.63311	6.82097	6.63512	6.41764	6.23706	6.25694	6.44822	6.79722	6.55752	6.73998	4.89475	2.94647	3.29373	2.43742	2.85651	5.18299	5.35203	5.91365	7.59671	7.35505	7.59108	7.59534	7.64605	7.35257	7.48024	7.61271	7.54414	7.48451
0.968	6.63307	6.82087	6.63512	6.41764	6.23705	6.25702	6.44827	6.7971	6.55747	6.73986	4.89698	2.94707	3.29449	2.43796	2.85772	5.18511	5.35359	5.9144	7.59645	7.35478	7.59082	7.59508	7.64579	7.3523	7.47995	7.61245	7.54389	7.48423
0.969	6.63303	6.82077	6.63511	6.41764	6.23704	6.25709	6.44832	6.79698	6.55742	6.73974	4.89921	2.94767	3.29525	2.4385	2.85893	5.18723	5.35513	5.91515	7.59619	7.35451	7.59056	7.59483	7.64553	7.35202	7.47966	7.61219	7.54363	7.48396
0.97	6.63298	6.82068	6.6351	6.41763	6.23703	6.25715	6.44837	6.79685	6.55737	6.73962	4.90144	2.94828	3.29601	2.43903	2.86015	5.18934	5.35668	5.91589	7.59592	7.35424	7.59029	7.59457	7.64527	7.35175	7.47937	7.61193	7.54338	7.48368
0.971	6.63294	6.82058	6.63509	6.41762	6.23701	6.25722	6.44841	6.79673	6.55731	6.7395	4.90367	2.94888	3.29677	2.43957	2.86136	5.19145	5.35822	5.91663	7.59566	7.35397	7.59003	7.59431	7.645	7.35147	7.47909	7.61167	7.54312	7.4834
0.972	6.63289	6.82048	6.63509	6.41761	6.237	6.25728	6.44845	6.79661	6.55725	6.73938	4.90589	2.94949	3.29754	2.44011	2.86257	5.19355	5.35975	5.91736	7.59539	7.3537	7.58976	7.59405	7.64474	7.35119	7.4788	7.6114	7.54287	7.48312
0.973	6.63285	6.82038	6.63508	6.4176	6.23698	6.25734	6.4485	6.79648	6.5572	6.73926	4.90812	2.95009	3.2983	2.44065	2.86378	5.19565	5.36128	5.91809	7.59513	7.35343	7.5895	7.59379	7.64448	7.35091	7.47851	7.61114	7.54261	7.48284
0.974	6.6328	6.82028	6.63506	6.41759	6.23696	6.2574	6.44854	6.79636	6.55714	6.73913	4.91034	2.9507	3.29906	2.44119	2.86499	5.19774	5.3628	5.91881	7.59486	7.35316	7.58923	7.59353	7.64422	7.35063	7.47822	7.61087	7.54236	7.48256
0.975	6.63275	6.82017	6.63505	6.41758	6.23694	6.25746	6.44857	6.79623	6.55708	6.73901	4.91256	2.9513	3.29982	2.44173	2.8662	5.19984	5.36432	5.91953	7.59459	7.35289	7.58896	7.59327	7.64395	7.35035	7.47793	7.61061	7.5421	7.48228
0.976	6.6327	6.82007	6.63504	6.41757	6.23692	6.25751	6.44861	6.7961	6.55702	6.73888	4.91478	2.9519	3.30058	2.44227	2.86741	5.20192	5.36583	5.92024	7.59433	7.35262	7.5887	7.59301	7.64369	7.35007	7.47764	7.61035	7.54184	7.48199
0.977	6.63265	6.81997	6.63502	6.41755	6.23689	6.25756	6.44864	6.79597	6.55696	6.73876	4.91699	2.95251	3.30134	2.44281	2.86863	5.20401	5.36734	5.92095	7.59406	7.35234	7.58843	7.59275	7.64343	7.34979	7.47735	7.61008	7.54158	7.48171
0.978	6.6326	6.81986	6.63501	6.41753	6.23687	6.25762	6.44868	6.79585	6.55689	6.73863	4.91921	2.95311	3.3021	2.44335	2.86984	5.20609	5.36884	5.92165	7.59379	7.35207	7.58816	7.59249	7.64316	7.34951	7.47705	7.60981	7.54133	7.48143
0.979	6.63255	6.81976	6.63499	6.41751	6.23684	6.25766	6.44871	6.79572	6.55683	6.7385	4.92142	2.95372	3.30286	2.44389	2.87105	5.20816	5.37034	5.92235	7.59352	7.3518	7.58789	7.59223	7.6429	7.34923	7.47676	7.60955	7.54107	7.48115
0.98	6.6325	6.81965	6.63497	6.41749	6.23681	6.25771	6.44874	6.79558	6.55676	6.73837	4.92363	2.95432	3.30362	2.44443	2.87226	5.21023	5.37184	5.92304	7.59325	7.35152	7.58762	7.59197	7.64263	7.34895	7.47647	7.60928	7.54081	7.48086
0.981	6.63244	6.81954	6.63495	6.41747	6.23678	6.25776	6.44877	6.79545	6.5567	6.73824	4.92584	2.95493	3.30439	2.44497	2.87347	5.2123	5.37332	5.92373	7.59298	7.35125	7.58736	7.5917	7.64237	7.34867	7.47617	7.60901	7.54055	7.48058
0.982	6.63239	6.81943	6.63493	6.41745	6.23674	6.2578	6.4488	6.79532	6.55663	6.73811	4.92804	2.95553	3.30515	2.44551	2.87468	5.21437	5.37481	5.92441	7.59271	7.35097	7.58709	7.59144	7.6421	7.34838	7.47588	7.60875	7.54029	7.48029
0.983	6.63233	6.81932	6.63491	6.41743	6.23671	6.25784	6.44882	6.79519	6.55656	6.73798	4.93025	2.95613	3.30591	2.44605	2.87589	5.21643	5.37628	5.92509	7.59244	7.3507	7.58681	7.59118	7.64183	7.3481	7.47559	7.60848	7.54003	7.48001
0.984	6.63227	6.81921	6.63489	6.4174	6.23667	6.25788	6.44884	6.79505	6.55649	6.73784	4.93245	2.95674	3.30667	2.44659	2.87711	5.21848	5.37776	5.92576	7.59217	7.35042	7.58654	7.59091	7.64156	7.34781	7.47529	7.60821	7.53977	7.47972
0.985	6.63222	6.8191	6.63487	6.41737	6.23664	6.25792	6.44887	6.79492	6.55641	6.73771	4.93465	2.95734	3.30743	2.44713	2.87832	5.22053	5.37923	5.92643	7.5919	7.35014	7.58627	7.59065	7.6413	7.34753	7.47499	7.60794	7.5395	7.47944
0.986	6.63216	6.81899	6.63484	6.41734	6.2366	6.25795	6.44889	6.79478	6.55634	6.73757	4.93685	2.95795	3.30819	2.44767	2.87953	5.22258	5.38069	5.9271	7.59163	7.34987	7.586	7.59038	7.64103	7.34724	7.4747	7.60767	7.53924	7.47915
0.987	6.6321	6.81888	6.63481	6.41731	6.23656	6.25798	6.44891	6.79464	6.55627	6.73744	4.93904	2.95855	3.30895	2.44821	2.88074	5.22463	5.38215	5.92775	7.59136	7.34959	7.58573	7.59012	7.64076	7.34696	7.4744	7.6074	7.53898	7.47886
0.988	6.63203	6.81876	6.63479	6.41728	6.23651	6.25801	6.44892	6.79451	6.55619	6.7373	4.94123	2.95916	3.30971	2.44875	2.88195	5.22667	5.3836	5.92841	7.59108	7.34931	7.58546	7.58985	7.64049	7.34667	7.4741	7.60713	7.53872	7.47857
0.989	6.63197	6.81865	6.63476	6.41725	6.23647	6.25804	6.44894	6.79437	6.55611	6.73716	4.94343	2.95976	3.31047	2.44929	2.88316	5.2287	5.38505	5.92906	7.59081	7.34903	7.58518	7.58958	7.64022	7.34639	7.47381	7.60686	7.53845	7.47829
0.99	6.63191	6.81853	6.63473	6.41722	6.23642	6.25807	6.44896	6.79423	6.55604	6.73702	4.94561	2.96036	3.31123	2.44983	2.88437	5.23073	5.38649	5.9297	7.59054	7.34875	7.58491	7.58932	7.63995	7.3461	7.47351	7.60659	7.53819	7.478
0.991	6.63184	6.81842	6.6347	6.41718	6.23637	6.2581	6.44897	6.79409	6.55596	6.73688	4.9478	2.96097	3.312	2.45036	2.88558	5.23276	5.38793	5.93034	7.59026	7.34847	7.58463	7.58905	7.63968	7.34581	7.47321	7.60631	7.53792	7.47771
0.992	6.63178	6.8183	6.63467	6.41714	6.23632	6.25812	6.44898	6.79395	6.55588	6.73674	4.94999	2.96157	3.31276	2.4509	2.8868	5.23478	5.38936	5.93098	7.58999	7.34819	7.58436	7.58878	7.63941	7.34552	7.47291	7.60604	7.53766	7.47742
0.993	6.63171	6.81818	6.63464	6.41711	6.23627	6.25814	6.44899	6.7938	6.55579	6.7366	4.95217	2.96218	3.31352	2.45144	2.88801	5.2368	5.39079	5.93161	7.58971	7.34791	7.58408	7.58851	7.63914	7.34523	7.47261	7.60577	7.53739	7.47713
0.994	6.63164	6.81806	6.6346	6.41707	6.23622	6.25816	6.449	6.79366	6.55571	6.73646	4.95435	2.96278	3.31428	2.45198	2.88922	5.23882	5.39221	5.93224	7.58944	7.34763	7.58381	7.58824	7.63886	7.34494	7.47231	7.6055	7.53713	7.47684
0.995	6.63157	6.81794	6.63457	6.41703	6.23617	6.25818	6.44901	6.79352	6.55563	6.73632	4.95653	2.96339	3.31504	2.45252	2.89043	5.24083	5.39363	5.93286	7.58916	7.34735	7.58353	7.58797	7.63859	7.34465	7.47201	7.60522	7.53686	7.47655
0.996	6.63151	6.81782	6.63453	6.41698	6.23611	6.25819	6.44901	6.79337	6.55554	6.73617	4.9587	2.96399	3.3158	2.45306	2.89164	5.24284	5.39504	5.93347	7.58888	7.34706	7.58326	7.5877	7.63832	7.34436	7.47171	7.60495	7.53659	7.47625
0.997	6.63143	6.8177	6.6345	6.41694	6.23605	6.25821	6.44902	6.79323	6.55546	6.73602	4.96088	2.9646	3.31656	2.4536	2.89285	5.24484	5.39645	5.93409	7.58861	7.34678	7.58298	7.58743	7.63805	7.34407	7.47141	7.60467	7.53633	7.47596
0.998	6.63136	6.81758	6.63446	6.4169	6.23599	6.25822	6.44902	6.79308	6.55537	6.73588	4.96305	2.9652	3.31732	2.45414	2.89406	5.24684	5.39785	5.9347	7.58833	7.3465	7.5827	7.58716	7.63777	7.34378	7.47111	7.6044	7.53606	7.47567
0.999	6.63129	6.81745	6.63442	6.41685	6.23593	6.25823	6.44902	6.79293	6.55528	6.73573	4.96522	2.9658	3.31808	2.45468	2.89527	5.24883	5.39924	5.9353	7.58805	7.34621	7.58242	7.58689	7.6375	7.34349	7.4708	7.60412	7.53579	7.47538
1	6.63122	6.81733	6.63438	6.4168	6.23587	6.25824	6.44902	6.79278	6.55519	6.73558	4.96739	2.96641	3.31884	2.45522	2.89649	5.25082	5.40064	5.9359	7.58777	7.34593	7.58215	7.58662	7.63722	7.3432	7.4705	7.60385	7.53552	7.47508
1.001	6.63114	6.8172	6.63434	6.41675	6.23581	6.25825	6.44902	6.79263	6.5551	6.73543	4.96955	2.96701	3.3196	2.45576	2.8977	5.25281	5.40202	5.93649	7.58749	7.34564	7.58187	7.58635	7.63695	7.3429	7.4702	7.60357	7.53525	7.47479
1.002	6.63107	6.81708	6.6343	6.4167	6.23574	6.25825	6.44902	6.79248	6.55501	6.73528	4.97172	2.96762	3.32036	2.4563	2.89891	5.25479	5.40341	5.93709	7.58722	7.34536	7.58159	7.58607	7.63667	7.34261	7.46989	7.60329	7.53498	7.47449
1.003	6.63099	6.81695	6.63426	6.41665	6.23568	6.25825	6.44901	6.79233	6.55491	6.73513	4.97388	2.96822	3.32113	2.45684	2.90012	5.25677	5.40478	5.93767	7.58694	7.34507	7.58131	7.5858	7.6364	7.34232	7.46959	7.60302	7.53471	7.4742
1.004	6.63091	6.81683	6.63422	6.4166	6.23561	6.25826	6.44901	6.79218	6.55482	6.73498	4.97604	2.96883	3.32189	2.45738	2.90133	5.25874	5.40615	5.93825	7.58666	7.34478	7.58103	7.58553	7.63612	7.34202	7.46928	7.60274	7.53444	7.4739
1.005	6.63083	6.8167	6.63417	6.41654	6.23554	6.25825	6.449	6.79203	6.55472	6.73483	4.97819	2.96943	3.32265	2.45792	2.90254	5.26071	5.40752	5.93883	7.58637	7.3445	7.58075	7.58525	7.63584	7.34173	7.46898	7.60246	7.53417	7.47361
1.006	6.63076	6.81657	6.63413	6.41649	6.23547	6.25825	6.44899	6.79188	6.55463	6.73467	4.98035	2.97004	3.32341	2.45846	2.90375	5.26267	5.40888	5.93941	7.58609	7.34421	7.58047	7.58498	7.63557	7.34143	7.46867	7.60218	7.5339	7.47331
1.007	6.63068	6.81644	6.63408	6.41643	6.23539	6.25825	6.44898	6.79172	6.55453	6.73452	4.9825	2.97064	3.32417	2.459	2.90496	5.26464	5.41024	5.93998	7.58581	7.34392	7.58019	7.58471	7.63529	7.34113	7.46837	7.6019	7.53363	7.47301
1.008	6.63059	6.81631	6.63403	6.41637	6.23532	6.25824	6.44897	6.79157	6.55443	6.73437	4.98465	2.97124	3.32493	2.45954	2.90617	5.26659	5.41159	5.94054	7.58553	7.34363	7.5799	7.58443	7.63501	7.34084	7.46806	7.60162	7.53336	7.47272
1.009	6.63051	6.81618	6.63398	6.41631	6.23524	6.25824	6.44896	6.79141	6.55433	6.73421	4.9868	2.97185	3.32569	2.46008	2.90739	5.26854	5.41294	5.9411	7.58525	7.34334	7.57962	7.58415	7.63473	7.34054	7.46775	7.60134	7.53308	7.47242
1.01	6.63043	6.81604	6.63393	6.41625	6.23517	6.25823	6.44895	6.79126	6.55423	6.73405	4.98894	2.97245	3.32645	2.46062	2.9086	5.27049	5.41428	5.94166	7.58497	7.34305	7.57934	7.58388	7.63445	7.34024	7.46744	7.60106	7.53281	7.47212
1.011	6.63035	6.81591	6.63388	6.41619	6.23509	6.25821	6.44893	6.7911	6.55413	6.73389	4.99109	2.97306	3.32721	2.46116	2.90981	5.27244	5.41562	5.94221	7.58468	7.34276	7.57905	7.5836	7.63417	7.33995	7.46714	7.60078	7.53254	7.47182
1.012	6.63026	6.81578	6.63383	6.41613	6.23501	6.2582	6.44891	6.79094	6.55402	6.73374	4.99323	2.97366	3.32797	2.4617	2.91102	5.27437	5.41695	5.94276	7.5844	7.34247	7.57877	7.58332	7.63389	7.33965	7.46683	7.6005	7.53226	7.47152
1.013	6.63017	6.81564	6.63378	6.41607	6.23492	6.25819	6.4489	6.79078	6.55392	6.73358	4.99536	2.97427	3.32873	2.46224	2.91223	5.27631	5.41828	5.9433	7.58411	7.34218	7.57849	7.58305	7.63361	7.33935	7.46652	7.60022	7.53199	7.47122
1.014	6.63009	6.81551	6.63373	6.416	6.23484	6.25817	6.44888	6.79062	6.55381	6.73341	4.9975	2.97487	3.32949	2.46278	2.91344	5.27824	5.4196	5.94385	7.58383	7.34189	7.5782	7.58277	7.63333	7.33905	7.46621	7.59994	7.53171	7.47092
1.015	6.63	6.81537	6.63367	6.41593	6.23476	6.25815	6.44886	6.79046	6.55371	6.73325	4.99963	2.97548	3.33025	2.46332	2.91465	5.28017	5.42092	5.94438	7.58354	7.3416	7.57792	7.58249	7.63305	7.33875	7.4659	7.59965	7.53144	7.47062
1.016	6.62991	6.81523	6.63362	6.41586	6.23467	6.25813	6.44883	6.7903	6.5536	6.73309	5.00177	2.97608	3.33101	2.46386	2.91586	5.28209	5.42223	5.94491	7.58326	7.3413	7.57763	7.58221	7.63277	7.33845	7.46559	7.59937	7.53116	7.47032
1.017	6.62982	6.8151	6.63356	6.4158	6.23458	6.25811	6.44881	6.79014	6.55349	6.73293	5.00389	2.97668	3.33177	2.4644	2.91707	5.28401	5.42353	5.94544	7.58297	7.34101	7.57735	7.58193	7.63249	7.33815	7.46528	7.59909	7.53089	7.47002
1.018	6.62973	6.81496	6.6335	6.41572	6.23449	6.25809	6.44879	6.78998	6.55338	6.73276	5.00602	2.97729	3.33254	2.46494	2.91828	5.28592	5.42484	5.94597	7.58269	7.34072	7.57706	7.58165	7.6322	7.33785	7.46497	7.5988	7.53061	7.46972
1.019	6.62964	6.81482	6.63344	6.41565	6.2344	6.25806	6.44876	6.78981	6.55327	6.7326	5.00815	2.97789	3.3333	2.46548	2.91949	5.28783	5.42613	5.94649	7.5824	7.34042	7.57677	7.58137	7.63192	7.33755	7.46465	7.59852	7.53033	7.46941
1.02	6.62955	6.81468	6.63338	6.41558	6.23431	6.25804	6.44873	6.78965	6.55316	6.73243	5.01027	2.9785	3.33406	2.46602	2.92071	5.28973	5.42743	5.947	7.58211	7.34013	7.57649	7.58109	7.63164	7.33724	7.46434	7.59823	7.53006	7.46911
1.021	6.62945	6.81454	6.63332	6.41551	6.23422	6.25801	6.4487	6.78948	6.55305	6.73227	5.01239	2.9791	3.33482	2.46656	2.92192	5.29163	5.42871	5.94752	7.58183	7.33983	7.5762	7.58081	7.63135	7.33694	7.46403	7.59795	7.52978	7.46881
1.022	6.62936	6.8144	6.63326	6.41543	6.23412	6.25798	6.44867	6.78932	6.55293	6.7321	5.0145	2.97971	3.33558	2.4671	2.92313	5.29353	5.42999	5.94803	7.58154	7.33954	7.57591	7.58053	7.63107	7.33664	7.46372	7.59766	7.5295	7.4685
1.023	6.62927	6.81425	6.6332	6.41535	6.23403	6.25795	6.44864	6.78915	6.55282	6.73193	5.01662	2.98031	3.33634	2.46764	2.92434	5.29542	5.43127	5.94853	7.58125	7.33924	7.57562	7.58025	7.63079	7.33633	7.4634	7.59738	7.52922	7.4682
1.024	6.62917	6.81411	6.63314	6.41528	6.23393	6.25792	6.44861	6.78899	6.5527	6.73176	5.01873	2.98092	3.3371	2.46818	2.92555	5.29731	5.43254	5.94903	7.58096	7.33895	7.57533	7.57997	7.6305	7.33603	7.46309	7.59709	7.52894	7.46789
1.025	6.62907	6.81397	6.63307	6.4152	6.23383	6.25788	6.44858	6.78882	6.55258	6.73159	5.02084	2.98152	3.33786	2.46872	2.92676	5.29919	5.43381	5.94953	7.58067	7.33865	7.57504	7.57969	7.63021	7.33572	7.46277	7.5968	7.52866	7.46759
1.026	6.62898	6.81382	6.63301	6.41512	6.23373	6.25784	6.44854	6.78865	6.55247	6.73142	5.02295	2.98212	3.33862	2.46926	2.92797	5.30107	5.43507	5.95002	7.58038	7.33835	7.57476	7.5794	7.62993	7.33542	7.46246	7.59652	7.52838	7.46728
1.027	6.62888	6.81368	6.63294	6.41504	6.23363	6.25781	6.4485	6.78848	6.55235	6.73125	5.02505	2.98273	3.33938	2.4698	2.92918	5.30294	5.43633	5.95051	7.58009	7.33805	7.57447	7.57912	7.62964	7.33511	7.46214	7.59623	7.5281	7.46698
1.028	6.62878	6.81353	6.63288	6.41495	6.23352	6.25777	6.44847	6.78831	6.55223	6.73108	5.02716	2.98333	3.34014	2.47034	2.93039	5.30481	5.43758	5.951	7.5798	7.33776	7.57417	7.57884	7.62936	7.33481	7.46183	7.59594	7.52782	7.46667
1.029	6.62868	6.81338	6.63281	6.41487	6.23342	6.25773	6.44843	6.78814	6.55211	6.73091	5.02926	2.98394	3.3409	2.47088	2.9316	5.30667	5.43883	5.95148	7.57951	7.33746	7.57388	7.57855	7.62907	7.3345	7.46151	7.59565	7.52754	7.46636
1.03	6.62858	6.81324	6.63274	6.41478	6.23331	6.25768	6.44839	6.78797	6.55198	6.73073	5.03136	2.98454	3.34166	2.47142	2.93281	5.30853	5.44007	5.95196	7.57922	7.33716	7.57359	7.57827	7.62878	7.33419	7.46119	7.59536	7.52726	7.46606
1.031	6.62847	6.81309	6.63267	6.4147	6.2332	6.25764	6.44834	6.78779	6.55186	6.73056	5.03345	2.98515	3.34242	2.47196	2.93402	5.31039	5.44131	5.95243	7.57893	7.33686	7.5733	7.57798	7.62849	7.33389	7.46088	7.59507	7.52697	7.46575
1.032	6.62837	6.81294	6.6326	6.41461	6.23309	6.25759	6.4483	6.78762	6.55174	6.73038	5.03554	2.98575	3.34318	2.4725	2.93524	5.31224	5.44254	5.9529	7.57864	7.33656	7.57301	7.5777	7.62821	7.33358	7.46056	7.59478	7.52669	7.46544
1.033	6.62827	6.81279	6.63253	6.41452	6.23298	6.25754	6.44826	6.78744	6.55161	6.7302	5.03763	2.98636	3.34394	2.47304	2.93645	5.31409	5.44377	5.95337	7.57834	7.33626	7.57272	7.57741	7.62792	7.33327	7.46024	7.59449	7.52641	7.46513
1.034	6.62816	6.81264	6.63246	6.41443	6.23287	6.2575	6.44821	6.78727	6.55148	6.73003	5.03972	2.98696	3.3447	2.47358	2.93766	5.31593	5.44499	5.95383	7.57805	7.33596	7.57242	7.57712	7.62763	7.33296	7.45992	7.5942	7.52613	7.46482
1.035	6.62806	6.81249	6.63238	6.41434	6.23276	6.25744	6.44816	6.78709	6.55136	6.72985	5.04181	2.98757	3.34546	2.47412	2.93887	5.31777	5.44621	5.95429	7.57776	7.33565	7.57213	7.57684	7.62734	7.33265	7.4596	7.59391	7.52584	7.46451
1.036	6.62795	6.81234	6.63231	6.41425	6.23264	6.25739	6.44812	6.78692	6.55123	6.72967	5.04389	2.98817	3.34622	2.47466	2.94008	5.3196	5.44742	5.95475	7.57746	7.33535	7.57184	7.57655	7.62705	7.33234	7.45928	7.59362	7.52556	7.4642
1.037	6.62784	6.81218	6.63223	6.41416	6.23253	6.25734	6.44807	6.78674	6.5511	6.72949	5.04597	2.98877	3.34698	2.4752	2.94129	5.32143	5.44863	5.9552	7.57717	7.33505	7.57154	7.57626	7.62676	7.33203	7.45896	7.59333	7.52527	7.46389
1.038	6.62774	6.81203	6.63216	6.41406	6.23241	6.25728	6.44802	6.78656	6.55097	6.72931	5.04805	2.98938	3.34774	2.47574	2.9425	5.32325	5.44983	5.95565	7.57687	7.33475	7.57125	7.57597	7.62647	7.33172	7.45864	7.59304	7.52499	7.46358
1.039	6.62763	6.81187	6.63208	6.41397	6.23229	6.25723	6.44797	6.78638	6.55084	6.72913	5.05012	2.98998	3.3485	2.47628	2.94371	5.32507	5.45103	5.9561	7.57658	7.33444	7.57095	7.57569	7.62618	7.33141	7.45832	7.59274	7.5247	7.46327
1.04	6.62752	6.81172	6.632	6.41387	6.23217	6.25717	6.44791	6.78621	6.5507	6.72895	5.0522	2.99059	3.34926	2.47682	2.94492	5.32689	5.45222	5.95654	7.57628	7.33414	7.57066	7.5754	7.62589	7.3311	7.458	7.59245	7.52442	7.46296
1.041	6.62741	6.81156	6.63193	6.41377	6.23205	6.25711	6.44786	6.78603	6.55057	6.72877	5.05427	2.99119	3.35002	2.47736	2.94613	5.3287	5.45341	5.95698	7.57599	7.33384	7.57036	7.57511	7.62559	7.33079	7.45768	7.59216	7.52413	7.46264
1.042	6.6273	6.81141	6.63185	6.41367	6.23193	6.25705	6.4478	6.78584	6.55044	6.72858	5.05633	2.9918	3.35078	2.4779	2.94734	5.33051	5.4546	5.95742	7.57569	7.33353	7.57006	7.57482	7.6253	7.33048	7.45736	7.59186	7.52384	7.46233
1.043	6.62718	6.81125	6.63177	6.41357	6.23181	6.25698	6.44775	6.78566	6.5503	6.7284	5.0584	2.9924	3.35154	2.47844	2.94855	5.33231	5.45577	5.95785	7.57539	7.33323	7.56977	7.57453	7.62501	7.33016	7.45703	7.59157	7.52356	7.46202
1.044	6.62707	6.81109	6.63169	6.41347	6.23168	6.25692	6.44769	6.78548	6.55016	6.72821	5.06046	2.99301	3.3523	2.47898	2.94976	5.3341	5.45695	5.95828	7.5751	7.33292	7.56947	7.57424	7.62472	7.32985	7.45671	7.59128	7.52327	7.46171
1.045	6.62696	6.81093	6.6316	6.41337	6.23155	6.25685	6.44763	6.7853	6.55003	6.72803	5.06252	2.99361	3.35306	2.47952	2.95097	5.3359	5.45812	5.9587	7.5748	7.33261	7.56917	7.57395	7.62442	7.32954	7.45639	7.59098	7.52298	7.46139
1.046	6.62684	6.81077	6.63152	6.41327	6.23143	6.25678	6.44757	6.78511	6.54989	6.72784	5.06458	2.99421	3.35382	2.48006	2.95218	5.33768	5.45928	5.95912	7.5745	7.33231	7.56888	7.57366	7.62413	7.32922	7.45606	7.59069	7.52269	7.46108
1.047	6.62673	6.81061	6.63144	6.41316	6.2313	6.25671	6.44751	6.78493	6.54975	6.72765	5.06663	2.99482	3.35458	2.4806	2.95339	5.33947	5.46044	5.95954	7.5742	7.332	7.56858	7.57337	7.62384	7.32891	7.45574	7.59039	7.5224	7.46076
1.048	6.62661	6.81045	6.63135	6.41306	6.23117	6.25664	6.44745	6.78474	6.54961	6.72746	5.06869	2.99542	3.35535	2.48114	2.95461	5.34125	5.4616	5.95996	7.57391	7.33169	7.56828	7.57307	7.62354	7.32859	7.45541	7.59009	7.52211	7.46045
1.049	6.62649	6.81029	6.63127	6.41295	6.23103	6.25657	6.44738	6.78456	6.54947	6.72728	5.07073	2.99603	3.35611	2.48168	2.95582	5.34302	5.46274	5.96037	7.57361	7.33139	7.56798	7.57278	7.62325	7.32828	7.45509	7.5898	7.52182	7.46013
1.05	6.62637	6.81013	6.63118	6.41284	6.2309	6.2565	6.44732	6.78437	6.54933	6.72709	5.07278	2.99663	3.35687	2.48222	2.95703	5.34479	5.46389	5.96078	7.57331	7.33108	7.56768	7.57249	7.62295	7.32796	7.45476	7.5895	7.52153	7.45982
1.051	6.62626	6.80997	6.63109	6.41273	6.23077	6.25642	6.44725	6.78419	6.54918	6.7269	5.07483	2.99724	3.35763	2.48276	2.95824	5.34655	5.46503	5.96118	7.57301	7.33077	7.56738	7.5722	7.62265	7.32764	7.45444	7.5892	7.52124	7.4595
1.052	6.62614	6.8098	6.631	6.41262	6.23063	6.25635	6.44718	6.784	6.54904	6.7267	5.07687	2.99784	3.35839	2.4833	2.95945	5.34831	5.46616	5.96158	7.57271	7.33046	7.56708	7.5719	7.62236	7.32733	7.45411	7.5889	7.52095	7.45918
1.053	6.62602	6.80964	6.63092	6.41251	6.2305	6.25627	6.44711	6.78381	6.54889	6.72651	5.07891	2.99845	3.35915	2.48385	2.96066	5.35007	5.46729	5.96198	7.57241	7.33015	7.56678	7.57161	7.62206	7.32701	7.45378	7.58861	7.52066	7.45886
1.054	6.62589	6.80947	6.63083	6.4124	6.23036	6.25619	6.44705	6.78362	6.54875	6.72632	5.08094	2.99905	3.35991	2.48439	2.96187	5.35182	5.46842	5.96237	7.57211	7.32984	7.56648	7.57131	7.62177	7.32669	7.45346	7.58831	7.52037	7.45855
1.055	6.62577	6.80931	6.63074	6.41229	6.23022	6.25611	6.44697	6.78343	6.5486	6.72613	5.08298	2.99966	3.36067	2.48493	2.96308	5.35357	5.46954	5.96277	7.5718	7.32953	7.56618	7.57102	7.62147	7.32637	7.45313	7.58801	7.52008	7.45823
1.056	6.62565	6.80914	6.63064	6.41217	6.23008	6.25603	6.4469	6.78324	6.54845	6.72593	5.08501	3.00026	3.36142	2.48547	2.96429	5.35531	5.47066	5.96315	7.5715	7.32922	7.56588	7.57073	7.62117	7.32606	7.4528	7.58771	7.51979	7.45791
1.057	6.62553	6.80897	6.63055	6.41206	6.22994	6.25594	6.44683	6.78305	6.5483	6.72574	5.08703	3.00086	3.36218	2.48601	2.9655	5.35704	5.47177	5.96354	7.5712	7.32891	7.56557	7.57043	7.62087	7.32574	7.45247	7.58741	7.51949	7.45759
1.058	6.6254	6.80881	6.63046	6.41194	6.22979	6.25586	6.44675	6.78286	6.54815	6.72554	5.08906	3.00147	3.36294	2.48655	2.96671	5.35878	5.47287	5.96392	7.5709	7.32859	7.56527	7.57013	7.62057	7.32542	7.45214	7.58711	7.5192	7.45727
1.059	6.62528	6.80864	6.63036	6.41183	6.22965	6.25577	6.44668	6.78266	6.548	6.72534	5.09108	3.00207	3.3637	2.48709	2.96792	5.3605	5.47398	5.9643	7.57059	7.32828	7.56497	7.56984	7.62028	7.3251	7.45181	7.58681	7.51891	7.45695
1.06	6.62515	6.80847	6.63027	6.41171	6.2295	6.25568	6.4466	6.78247	6.54785	6.72515	5.0931	3.00268	3.36446	2.48763	2.96913	5.36223	5.47507	5.96468	7.57029	7.32797	7.56467	7.56954	7.61998	7.32478	7.45148	7.58651	7.51861	7.45663
1.061	6.62502	6.8083	6.63017	6.41159	6.22936	6.25559	6.44653	6.78228	6.5477	6.72495	5.09512	3.00328	3.36522	2.48817	2.97034	5.36394	5.47616	5.96505	7.56999	7.32766	7.56436	7.56924	7.61968	7.32446	7.45115	7.58621	7.51832	7.45631
1.062	6.6249	6.80813	6.63008	6.41147	6.22921	6.2555	6.44645	6.78208	6.54755	6.72475	5.09713	3.00389	3.36598	2.48871	2.97155	5.36566	5.47725	5.96542	7.56968	7.32734	7.56406	7.56895	7.61938	7.32413	7.45082	7.58591	7.51802	7.45599
1.063	6.62477	6.80796	6.62998	6.41135	6.22906	6.25541	6.44637	6.78189	6.54739	6.72455	5.09915	3.00449	3.36674	2.48925	2.97276	5.36737	5.47833	5.96579	7.56938	7.32703	7.56375	7.56865	7.61908	7.32381	7.45049	7.5856	7.51773	7.45567
1.064	6.62464	6.80779	6.62988	6.41122	6.22891	6.25531	6.44629	6.78169	6.54724	6.72435	5.10115	3.0051	3.3675	2.48979	2.97397	5.36907	5.47941	5.96615	7.56907	7.32672	7.56345	7.56835	7.61878	7.32349	7.45016	7.5853	7.51743	7.45535
1.065	6.62451	6.80761	6.62978	6.4111	6.22876	6.25522	6.4462	6.78149	6.54708	6.72415	5.10316	3.0057	3.36826	2.49033	2.97518	5.37077	5.48049	5.96651	7.56877	7.3264	7.56314	7.56805	7.61848	7.32317	7.44983	7.585	7.51714	7.45503
1.066	6.62438	6.80744	6.62968	6.41098	6.2286	6.25512	6.44612	6.78129	6.54692	6.72395	5.10516	3.00631	3.36902	2.49087	2.97639	5.37246	5.48155	5.96687	7.56846	7.32609	7.56284	7.56775	7.61817	7.32285	7.4495	7.5847	7.51684	7.4547
1.067	6.62425	6.80727	6.62958	6.41085	6.22845	6.25502	6.44604	6.7811	6.54676	6.72375	5.10716	3.00691	3.36978	2.49141	2.9776	5.37415	5.48262	5.96722	7.56816	7.32577	7.56253	7.56746	7.61787	7.32252	7.44916	7.58439	7.51654	7.45438
1.068	6.62411	6.80709	6.62948	6.41072	6.22829	6.25493	6.44595	6.7809	6.54661	6.72354	5.10916	3.00751	3.37054	2.49195	2.97881	5.37584	5.48368	5.96757	7.56785	7.32545	7.56223	7.56716	7.61757	7.3222	7.44883	7.58409	7.51625	7.45406
1.069	6.62398	6.80692	6.62938	6.41059	6.22814	6.25482	6.44586	6.7807	6.54645	6.72334	5.11116	3.00812	3.3713	2.49249	2.98002	5.37752	5.48473	5.96792	7.56754	7.32514	7.56192	7.56686	7.61727	7.32187	7.4485	7.58379	7.51595	7.45373
1.07	6.62385	6.80674	6.62928	6.41047	6.22798	6.25472	6.44578	6.7805	6.54629	6.72314	5.11315	3.00872	3.37206	2.49303	2.98123	5.3792	5.48578	5.96826	7.56724	7.32482	7.56161	7.56656	7.61697	7.32155	7.44816	7.58348	7.51565	7.45341
1.071	6.62371	6.80657	6.62917	6.41034	6.22782	6.25462	6.44569	6.7803	6.54612	6.72293	5.11514	3.00933	3.37282	2.49357	2.98244	5.38087	5.48683	5.96861	7.56693	7.3245	7.5613	7.56625	7.61666	7.32123	7.44783	7.58318	7.51535	7.45308
1.072	6.62358	6.80639	6.62907	6.41021	6.22766	6.25451	6.4456	6.7801	6.54596	6.72272	5.11712	3.00993	3.37358	2.49411	2.98365	5.38253	5.48787	5.96895	7.56662	7.32419	7.561	7.56595	7.61636	7.3209	7.44749	7.58287	7.51505	7.45276
1.073	6.62344	6.80621	6.62896	6.41007	6.2275	6.25441	6.44551	6.77989	6.5458	6.72252	5.11911	3.01054	3.37434	2.49465	2.98486	5.38419	5.4889	5.96928	7.56631	7.32387	7.56069	7.56565	7.61605	7.32057	7.44716	7.58256	7.51476	7.45243
1.074	6.6233	6.80603	6.62886	6.40994	6.22734	6.2543	6.44541	6.77969	6.54563	6.72231	5.12109	3.01114	3.3751	2.49519	2.98607	5.38585	5.48993	5.96961	7.56601	7.32355	7.56038	7.56535	7.61575	7.32025	7.44682	7.58226	7.51446	7.45211
1.075	6.62317	6.80585	6.62875	6.40981	6.22717	6.25419	6.44532	6.77949	6.54547	6.7221	5.12307	3.01175	3.37586	2.49573	2.98728	5.3875	5.49096	5.96995	7.5657	7.32323	7.56007	7.56505	7.61545	7.31992	7.44649	7.58195	7.51416	7.45178
1.076	6.62303	6.80567	6.62864	6.40967	6.22701	6.25408	6.44523	6.77928	6.5453	6.72189	5.12504	3.01235	3.37662	2.49627	2.98849	5.38915	5.49198	5.97027	7.56539	7.32291	7.55976	7.56475	7.61514	7.31959	7.44615	7.58165	7.51386	7.45145
1.077	6.62289	6.80549	6.62853	6.40954	6.22684	6.25397	6.44513	6.77908	6.54514	6.72168	5.12701	3.01295	3.37738	2.49681	2.9897	5.39079	5.493	5.9706	7.56508	7.32259	7.55945	7.56444	7.61484	7.31927	7.44582	7.58134	7.51356	7.45113
1.078	6.62275	6.80531	6.62842	6.4094	6.22668	6.25386	6.44504	6.77887	6.54497	6.72147	5.12898	3.01356	3.37814	2.49735	2.99091	5.39243	5.49401	5.97092	7.56477	7.32227	7.55914	7.56414	7.61453	7.31894	7.44548	7.58103	7.51326	7.4508
1.079	6.62261	6.80513	6.62831	6.40926	6.22651	6.25374	6.44494	6.77867	6.5448	6.72126	5.13095	3.01416	3.3789	2.49789	2.99212	5.39406	5.49502	5.97124	7.56446	7.32195	7.55883	7.56384	7.61422	7.31861	7.44514	7.58072	7.51295	7.45047
1.08	6.62247	6.80495	6.6282	6.40912	6.22634	6.25363	6.44484	6.77846	6.54463	6.72105	5.13291	3.01477	3.37966	2.49844	2.99333	5.39569	5.49602	5.97155	7.56415	7.32163	7.55852	7.56353	7.61392	7.31828	7.4448	7.58042	7.51265	7.45014
1.081	6.62233	6.80477	6.62809	6.40898	6.22617	6.25351	6.44474	6.77825	6.54446	6.72084	5.13487	3.01537	3.38042	2.49898	2.99454	5.39731	5.49702	5.97187	7.56384	7.32131	7.55821	7.56323	7.61361	7.31795	7.44446	7.58011	7.51235	7.44982
1.082	6.62218	6.80458	6.62798	6.40884	6.226	6.25339	6.44464	6.77805	6.54429	6.72063	5.13683	3.01598	3.38118	2.49952	2.99575	5.39893	5.49802	5.97218	7.56352	7.32099	7.5579	7.56292	7.6133	7.31762	7.44413	7.5798	7.51205	7.44949
1.083	6.62204	6.8044	6.62787	6.4087	6.22582	6.25327	6.44454	6.77784	6.54412	6.72041	5.13878	3.01658	3.38194	2.50006	2.99696	5.40055	5.49901	5.97248	7.56321	7.32066	7.55759	7.56262	7.613	7.31729	7.44379	7.57949	7.51175	7.44916
1.084	6.6219	6.80421	6.62775	6.40856	6.22565	6.25315	6.44444	6.77763	6.54394	6.7202	5.14074	3.01719	3.3827	2.5006	2.99817	5.40215	5.49999	5.97279	7.5629	7.32034	7.55727	7.56231	7.61269	7.31696	7.44345	7.57918	7.51144	7.44883
1.085	6.62175	6.80403	6.62764	6.40842	6.22548	6.25303	6.44433	6.77742	6.54377	6.71998	5.14268	3.01779	3.38345	2.50114	2.99938	5.40376	5.50097	5.97309	7.56259	7.32002	7.55696	7.56201	7.61238	7.31663	7.44311	7.57887	7.51114	7.4485
1.086	6.6216	6.80384	6.62752	6.40827	6.2253	6.25291	6.44423	6.77721	6.5436	6.71977	5.14463	3.0184	3.38421	2.50168	3.00059	5.40536	5.50195	5.97339	7.56227	7.3197	7.55665	7.5617	7.61207	7.3163	7.44277	7.57856	7.51084	7.44817
1.087	6.62146	6.80366	6.62741	6.40813	6.22512	6.25278	6.44412	6.777	6.54342	6.71955	5.14657	3.019	3.38497	2.50222	3.0018	5.40695	5.50292	5.97369	7.56196	7.31937	7.55634	7.5614	7.61176	7.31597	7.44243	7.57825	7.51053	7.44784
1.088	6.62131	6.80347	6.62729	6.40798	6.22494	6.25266	6.44402	6.77678	6.54324	6.71933	5.14851	3.0196	3.38573	2.50276	3.00301	5.40854	5.50389	5.97398	7.56165	7.31905	7.55602	7.56109	7.61145	7.31564	7.44209	7.57794	7.51023	7.44751
1.089	6.62116	6.80328	6.62717	6.40783	6.22476	6.25253	6.44391	6.77657	6.54307	6.71912	5.15045	3.02021	3.38649	2.5033	3.00422	5.41013	5.50485	5.97427	7.56133	7.31872	7.55571	7.56078	7.61114	7.31531	7.44175	7.57763	7.50992	7.44717
1.09	6.62101	6.80309	6.62705	6.40768	6.22458	6.2524	6.4438	6.77636	6.54289	6.7189	5.15238	3.02081	3.38725	2.50384	3.00543	5.41171	5.50581	5.97456	7.56102	7.3184	7.55539	7.56047	7.61083	7.31497	7.4414	7.57731	7.50962	7.44684
1.091	6.62087	6.8029	6.62693	6.40753	6.2244	6.25227	6.44369	6.77615	6.54271	6.71868	5.15431	3.02142	3.38801	2.50438	3.00664	5.41328	5.50676	5.97485	7.5607	7.31807	7.55508	7.56017	7.61052	7.31464	7.44106	7.577	7.50931	7.44651
1.092	6.62072	6.80271	6.62682	6.40738	6.22422	6.25214	6.44358	6.77593	6.54253	6.71846	5.15624	3.02202	3.38877	2.50492	3.00785	5.41485	5.50771	5.97513	7.56039	7.31775	7.55476	7.55986	7.61021	7.31431	7.44072	7.57669	7.50901	7.44618
1.093	6.62056	6.80252	6.62669	6.40723	6.22403	6.25201	6.44347	6.77572	6.54235	6.71824	5.15817	3.02263	3.38953	2.50546	3.00906	5.41642	5.50865	5.97541	7.56007	7.31742	7.55445	7.55955	7.6099	7.31397	7.44038	7.57638	7.5087	7.44584
1.094	6.62041	6.80233	6.62657	6.40708	6.22385	6.25188	6.44335	6.7755	6.54217	6.71802	5.16009	3.02323	3.39029	2.506	3.01027	5.41798	5.50959	5.97569	7.55976	7.3171	7.55413	7.55924	7.60959	7.31364	7.44003	7.57606	7.50839	7.44551
1.095	6.62026	6.80214	6.62645	6.40693	6.22366	6.25174	6.44324	6.77528	6.54199	6.7178	5.16201	3.02384	3.39105	2.50654	3.01148	5.41954	5.51053	5.97596	7.55944	7.31677	7.55382	7.55893	7.60928	7.31331	7.43969	7.57575	7.50809	7.44518
1.096	6.62011	6.80195	6.62633	6.40677	6.22348	6.2516	6.44312	6.77507	6.5418	6.71758	5.16392	3.02444	3.39181	2.50708	3.01269	5.42109	5.51146	5.97623	7.55913	7.31644	7.5535	7.55862	7.60897	7.31297	7.43935	7.57544	7.50778	7.44484
1.097	6.61996	6.80176	6.6262	6.40662	6.22329	6.25147	6.44301	6.77485	6.54162	6.71735	5.16584	3.02504	3.39257	2.50762	3.0139	5.42263	5.51239	5.9765	7.55881	7.31611	7.55318	7.55831	7.60866	7.31264	7.439	7.57512	7.50747	7.44451
1.098	6.6198	6.80156	6.62608	6.40646	6.2231	6.25133	6.44289	6.77463	6.54144	6.71713	5.16774	3.02565	3.39332	2.50816	3.01511	5.42417	5.51331	5.97677	7.55849	7.31579	7.55287	7.558	7.60834	7.3123	7.43866	7.57481	7.50716	7.44417
1.099	6.61965	6.80137	6.62596	6.40631	6.22291	6.25119	6.44277	6.77441	6.54125	6.7169	5.16965	3.02625	3.39408	2.5087	3.01632	5.42571	5.51423	5.97704	7.55817	7.31546	7.55255	7.55769	7.60803	7.31196	7.43831	7.57449	7.50686	7.44384
1.1	6.61949	6.80117	6.62583	6.40615	6.22272	6.25105	6.44266	6.77419	6.54106	6.71668	5.17155	3.02686	3.39484	2.50925	3.01753	5.42724	5.51514	5.9773	7.55786	7.31513	7.55223	7.55738	7.60772	7.31163	7.43797	7.57418	7.50655	7.4435
1.101	6.61933	6.80098	6.6257	6.40599	6.22252	6.25091	6.44254	6.77398	6.54088	6.71645	5.17345	3.02746	3.3956	2.50979	3.01874	5.42877	5.51605	5.97756	7.55754	7.3148	7.55191	7.55707	7.6074	7.31129	7.43762	7.57386	7.50624	7.44317
1.102	6.61918	6.80078	6.62558	6.40583	6.22233	6.25076	6.44242	6.77375	6.54069	6.71623	5.17535	3.02807	3.39636	2.51033	3.01995	5.43029	5.51696	5.97781	7.55722	7.31447	7.5516	7.55676	7.60709	7.31095	7.43728	7.57355	7.50593	7.44283
1.103	6.61902	6.80059	6.62545	6.40567	6.22214	6.25062	6.44229	6.77353	6.5405	6.716	5.17725	3.02867	3.39712	2.51087	3.02116	5.43181	5.51786	5.97807	7.5569	7.31414	7.55128	7.55644	7.60678	7.31062	7.43693	7.57323	7.50562	7.44249
1.104	6.61886	6.80039	6.62532	6.40551	6.22194	6.25047	6.44217	6.77331	6.54031	6.71577	5.17914	3.02928	3.39788	2.51141	3.02237	5.43332	5.51875	5.97832	7.55658	7.31381	7.55096	7.55613	7.60646	7.31028	7.43658	7.57291	7.50531	7.44216
1.105	6.6187	6.80019	6.62519	6.40535	6.22174	6.25033	6.44205	6.77309	6.54012	6.71554	5.18102	3.02988	3.39864	2.51195	3.02358	5.43483	5.51964	5.97857	7.55626	7.31348	7.55064	7.55582	7.60615	7.30994	7.43624	7.5726	7.505	7.44182
1.106	6.61854	6.79999	6.62506	6.40518	6.22155	6.25018	6.44192	6.77287	6.53993	6.71532	5.18291	3.03048	3.3994	2.51249	3.02479	5.43633	5.52053	5.97882	7.55594	7.31315	7.55032	7.55551	7.60583	7.3096	7.43589	7.57228	7.50469	7.44148
1.107	6.61838	6.79979	6.62493	6.40502	6.22135	6.25003	6.4418	6.77264	6.53974	6.71509	5.18479	3.03109	3.40016	2.51303	3.026	5.43783	5.52141	5.97906	7.55562	7.31282	7.55	7.55519	7.60552	7.30926	7.43554	7.57196	7.50438	7.44114
1.108	6.61822	6.79959	6.6248	6.40485	6.22115	6.24988	6.44167	6.77242	6.53955	6.71486	5.18667	3.03169	3.40091	2.51357	3.02721	5.43932	5.52229	5.9793	7.5553	7.31248	7.54968	7.55488	7.6052	7.30892	7.43519	7.57164	7.50407	7.4408
1.109	6.61806	6.7994	6.62467	6.40469	6.22095	6.24973	6.44154	6.7722	6.53935	6.71463	5.18854	3.0323	3.40167	2.51411	3.02842	5.44081	5.52317	5.97954	7.55498	7.31215	7.54936	7.55457	7.60488	7.30858	7.43484	7.57133	7.50375	7.44047
1.11	6.6179	6.79919	6.62453	6.40452	6.22074	6.24957	6.44141	6.77197	6.53916	6.71439	5.19042	3.0329	3.40243	2.51465	3.02962	5.44229	5.52404	5.97978	7.55466	7.31182	7.54904	7.55425	7.60457	7.30824	7.43449	7.57101	7.50344	7.44013
1.111	6.61774	6.79899	6.6244	6.40435	6.22054	6.24942	6.44129	6.77175	6.53896	6.71416	5.19228	3.03351	3.40319	2.51519	3.03083	5.44377	5.5249	5.98002	7.55434	7.31149	7.54871	7.55394	7.60425	7.3079	7.43414	7.57069	7.50313	7.43979
1.112	6.61757	6.79879	6.62427	6.40419	6.22034	6.24927	6.44116	6.77152	6.53877	6.71393	5.19415	3.03411	3.40395	2.51573	3.03204	5.44525	5.52576	5.98025	7.55402	7.31115	7.54839	7.55362	7.60393	7.30756	7.43379	7.57037	7.50282	7.43945
1.113	6.61741	6.79859	6.62413	6.40402	6.22013	6.24911	6.44102	6.77129	6.53857	6.7137	5.19601	3.03472	3.40471	2.51627	3.03325	5.44672	5.52662	5.98048	7.55369	7.31082	7.54807	7.55331	7.60361	7.30722	7.43344	7.57005	7.5025	7.43911
1.114	6.61724	6.79839	6.62399	6.40385	6.21993	6.24895	6.44089	6.77106	6.53837	6.71346	5.19787	3.03532	3.40547	2.51681	3.03446	5.44818	5.52747	5.98071	7.55337	7.31048	7.54775	7.55299	7.6033	7.30688	7.43309	7.56973	7.50219	7.43877
1.115	6.61708	6.79818	6.62386	6.40367	6.21972	6.24879	6.44076	6.77084	6.53818	6.71323	5.19973	3.03592	3.40623	2.51735	3.03567	5.44964	5.52832	5.98093	7.55305	7.31015	7.54742	7.55267	7.60298	7.30654	7.43274	7.56941	7.50188	7.43842
1.116	6.61691	6.79798	6.62372	6.4035	6.21951	6.24863	6.44062	6.77061	6.53798	6.71299	5.20158	3.03653	3.40699	2.51789	3.03688	5.45109	5.52917	5.98115	7.55273	7.30982	7.5471	7.55236	7.60266	7.30619	7.43239	7.56909	7.50156	7.43808
1.117	6.61674	6.79778	6.62358	6.40333	6.2193	6.24847	6.44049	6.77038	6.53778	6.71276	5.20343	3.03713	3.40774	2.51844	3.03809	5.45254	5.53001	5.98137	7.5524	7.30948	7.54678	7.55204	7.60234	7.30585	7.43204	7.56877	7.50125	7.43774
1.118	6.61658	6.79757	6.62345	6.40316	6.21909	6.24831	6.44035	6.77015	6.53758	6.71252	5.20528	3.03774	3.4085	2.51898	3.0393	5.45399	5.53084	5.98159	7.55208	7.30914	7.54645	7.55172	7.60202	7.30551	7.43169	7.56845	7.50093	7.4374
1.119	6.61641	6.79736	6.62331	6.40298	6.21888	6.24815	6.44022	6.76992	6.53738	6.71228	5.20712	3.03834	3.40926	2.51952	3.04051	5.45543	5.53167	5.98181	7.55175	7.30881	7.54613	7.55141	7.6017	7.30516	7.43134	7.56813	7.50062	7.43706
1.12	6.61624	6.79716	6.62317	6.40281	6.21867	6.24798	6.44008	6.76969	6.53717	6.71205	5.20896	3.03895	3.41002	2.52006	3.04172	5.45686	5.5325	5.98202	7.55143	7.30847	7.5458	7.55109	7.60138	7.30482	7.43098	7.5678	7.5003	7.43671
1.121	6.61607	6.79695	6.62303	6.40263	6.21845	6.24782	6.43994	6.76946	6.53697	6.71181	5.2108	3.03955	3.41078	2.5206	3.04293	5.45829	5.53333	5.98223	7.5511	7.30814	7.54548	7.55077	7.60106	7.30447	7.43063	7.56748	7.49999	7.43637
1.122	6.6159	6.79674	6.62288	6.40245	6.21824	6.24765	6.4398	6.76922	6.53677	6.71157	5.21263	3.04015	3.41154	2.52114	3.04414	5.45972	5.53414	5.98244	7.55078	7.3078	7.54515	7.55045	7.60074	7.30413	7.43028	7.56716	7.49967	7.43603
1.123	6.61573	6.79654	6.62274	6.40228	6.21802	6.24748	6.43966	6.76899	6.53656	6.71133	5.21446	3.04076	3.4123	2.52168	3.04535	5.46114	5.53496	5.98265	7.55045	7.30746	7.54483	7.55014	7.60042	7.30379	7.42992	7.56684	7.49935	7.43568
1.124	6.61556	6.79633	6.6226	6.4021	6.21781	6.24731	6.43952	6.76876	6.53636	6.71109	5.21629	3.04136	3.41305	2.52222	3.04656	5.46255	5.53577	5.98285	7.55013	7.30712	7.5445	7.54982	7.6001	7.30344	7.42957	7.56651	7.49904	7.43534
1.125	6.61538	6.79612	6.62246	6.40192	6.21759	6.24715	6.43938	6.76853	6.53615	6.71085	5.21811	3.04197	3.41381	2.52276	3.04776	5.46396	5.53658	5.98305	7.5498	7.30679	7.54418	7.5495	7.59978	7.30309	7.42922	7.56619	7.49872	7.435
1.126	6.61521	6.79591	6.62231	6.40174	6.21737	6.24697	6.43923	6.76829	6.53595	6.71061	5.21993	3.04257	3.41457	2.5233	3.04897	5.46537	5.53738	5.98325	7.54948	7.30645	7.54385	7.54918	7.59946	7.30275	7.42886	7.56587	7.4984	7.43465
1.127	6.61504	6.7957	6.62217	6.40156	6.21715	6.2468	6.43909	6.76806	6.53574	6.71037	5.22175	3.04318	3.41533	2.52384	3.05018	5.46677	5.53818	5.98345	7.54915	7.30611	7.54352	7.54886	7.59913	7.3024	7.42851	7.56554	7.49808	7.43431
1.128	6.61486	6.79549	6.62202	6.40137	6.21693	6.24663	6.43895	6.76782	6.53553	6.71012	5.22356	3.04378	3.41609	2.52438	3.05139	5.46816	5.53897	5.98365	7.54882	7.30577	7.5432	7.54854	7.59881	7.30205	7.42815	7.56522	7.49777	7.43396
1.129	6.61469	6.79528	6.62188	6.40119	6.21671	6.24645	6.4388	6.76759	6.53532	6.70988	5.22537	3.04439	3.41685	2.52492	3.0526	5.46955	5.53976	5.98384	7.54849	7.30543	7.54287	7.54822	7.59849	7.30171	7.4278	7.56489	7.49745	7.43361
1.13	6.61451	6.79507	6.62173	6.40101	6.21649	6.24628	6.43865	6.76735	6.53512	6.70964	5.22718	3.04499	3.4176	2.52546	3.05381	5.47094	5.54055	5.98403	7.54817	7.30509	7.54254	7.5479	7.59817	7.30136	7.42744	7.56457	7.49713	7.43327
1.131	6.61434	6.79485	6.62159	6.40082	6.21627	6.2461	6.43851	6.76711	6.53491	6.70939	5.22898	3.04559	3.41836	2.526	3.05502	5.47232	5.54133	5.98422	7.54784	7.30475	7.54221	7.54757	7.59784	7.30101	7.42708	7.56424	7.49681	7.43292
1.132	6.61416	6.79464	6.62144	6.40064	6.21604	6.24592	6.43836	6.76687	6.53469	6.70915	5.23078	3.0462	3.41912	2.52655	3.05623	5.4737	5.54211	5.98441	7.54751	7.30441	7.54189	7.54725	7.59752	7.30066	7.42673	7.56392	7.49649	7.43257
1.133	6.61398	6.79443	6.62129	6.40045	6.21582	6.24575	6.43821	6.76664	6.53448	6.7089	5.23258	3.0468	3.41988	2.52709	3.05744	5.47507	5.54288	5.98459	7.54718	7.30407	7.54156	7.54693	7.5972	7.30032	7.42637	7.56359	7.49617	7.43223
1.134	6.61381	6.79421	6.62114	6.40026	6.21559	6.24557	6.43806	6.7664	6.53427	6.70866	5.23437	3.04741	3.42064	2.52763	3.05865	5.47644	5.54365	5.98477	7.54685	7.30373	7.54123	7.54661	7.59687	7.29997	7.42601	7.56326	7.49585	7.43188
1.135	6.61363	6.794	6.62099	6.40008	6.21537	6.24539	6.43791	6.76616	6.53406	6.70841	5.23616	3.04801	3.4214	2.52817	3.05986	5.4778	5.54442	5.98495	7.54652	7.30338	7.5409	7.54629	7.59655	7.29962	7.42565	7.56294	7.49553	7.43153
1.136	6.61345	6.79378	6.62084	6.39989	6.21514	6.2452	6.43775	6.76592	6.53384	6.70816	5.23795	3.04862	3.42215	2.52871	3.06106	5.47916	5.54518	5.98513	7.54619	7.30304	7.54057	7.54596	7.59622	7.29927	7.4253	7.56261	7.49521	7.43118
1.137	6.61327	6.79357	6.62069	6.3997	6.21491	6.24502	6.4376	6.76568	6.53363	6.70792	5.23973	3.04922	3.42291	2.52925	3.06227	5.48051	5.54594	5.98531	7.54586	7.3027	7.54024	7.54564	7.5959	7.29892	7.42494	7.56228	7.49489	7.43084
1.138	6.61309	6.79335	6.62054	6.39951	6.21468	6.24484	6.43745	6.76544	6.53342	6.70767	5.24151	3.04982	3.42367	2.52979	3.06348	5.48186	5.54669	5.98548	7.54553	7.30236	7.53991	7.54532	7.59557	7.29857	7.42458	7.56196	7.49457	7.43049
1.139	6.61291	6.79314	6.62039	6.39932	6.21445	6.24465	6.43729	6.7652	6.5332	6.70742	5.24329	3.05043	3.42443	2.53033	3.06469	5.4832	5.54744	5.98565	7.5452	7.30201	7.53958	7.54499	7.59525	7.29822	7.42422	7.56163	7.49425	7.43014
1.14	6.61273	6.79292	6.62023	6.39912	6.21422	6.24447	6.43714	6.76495	6.53298	6.70717	5.24506	3.05103	3.42519	2.53087	3.0659	5.48454	5.54819	5.98582	7.54487	7.30167	7.53925	7.54467	7.59492	7.29787	7.42386	7.5613	7.49392	7.42979
1.141	6.61255	6.7927	6.62008	6.39893	6.21399	6.24428	6.43698	6.76471	6.53277	6.70692	5.24683	3.05164	3.42595	2.53141	3.06711	5.48587	5.54893	5.98599	7.54454	7.30133	7.53892	7.54435	7.59459	7.29751	7.4235	7.56097	7.4936	7.42944
1.142	6.61236	6.79248	6.61993	6.39874	6.21375	6.24409	6.43682	6.76447	6.53255	6.70667	5.24859	3.05224	3.4267	2.53195	3.06832	5.4872	5.54967	5.98615	7.54421	7.30098	7.53858	7.54402	7.59427	7.29716	7.42314	7.56064	7.49328	7.42909
1.143	6.61218	6.79226	6.61977	6.39854	6.21352	6.2439	6.43667	6.76423	6.53233	6.70642	5.25036	3.05285	3.42746	2.53249	3.06953	5.48852	5.5504	5.98632	7.54388	7.30064	7.53825	7.5437	7.59394	7.29681	7.42278	7.56031	7.49296	7.42874
1.144	6.612	6.79204	6.61962	6.39835	6.21328	6.24371	6.43651	6.76398	6.53211	6.70617	5.25212	3.05345	3.42822	2.53303	3.07074	5.48984	5.55113	5.98648	7.54354	7.30029	7.53792	7.54337	7.59361	7.29646	7.42242	7.55998	7.49263	7.42839
1.145	6.61181	6.79182	6.61946	6.39815	6.21305	6.24352	6.43635	6.76374	6.53189	6.70591	5.25387	3.05405	3.42898	2.53357	3.07194	5.49115	5.55186	5.98664	7.54321	7.29995	7.53759	7.54305	7.59329	7.2961	7.42206	7.55965	7.49231	7.42803
1.146	6.61163	6.7916	6.6193	6.39796	6.21281	6.24333	6.43619	6.76349	6.53167	6.70566	5.25562	3.05466	3.42974	2.53411	3.07315	5.49246	5.55258	5.98679	7.54288	7.2996	7.53726	7.54272	7.59296	7.29575	7.4217	7.55932	7.49199	7.42768
1.147	6.61144	6.79138	6.61915	6.39776	6.21257	6.24313	6.43603	6.76325	6.53145	6.70541	5.25737	3.05526	3.43049	2.53466	3.07436	5.49376	5.5533	5.98695	7.54255	7.29926	7.53692	7.54239	7.59263	7.2954	7.42133	7.55899	7.49166	7.42733
1.148	6.61125	6.79116	6.61899	6.39756	6.21233	6.24294	6.43586	6.763	6.53123	6.70515	5.25912	3.05587	3.43125	2.5352	3.07557	5.49506	5.55401	5.9871	7.54221	7.29891	7.53659	7.54207	7.5923	7.29504	7.42097	7.55866	7.49134	7.42698
1.149	6.61107	6.79094	6.61883	6.39736	6.2121	6.24274	6.4357	6.76275	6.531	6.7049	5.26086	3.05647	3.43201	2.53574	3.07678	5.49636	5.55472	5.98725	7.54188	7.29857	7.53626	7.54174	7.59197	7.29469	7.42061	7.55833	7.49101	7.42663
1.15	6.61088	6.79072	6.61867	6.39716	6.21185	6.24255	6.43554	6.76251	6.53078	6.70464	5.2626	3.05708	3.43277	2.53628	3.07799	5.49765	5.55543	5.9874	7.54155	7.29822	7.53592	7.54141	7.59164	7.29434	7.42025	7.558	7.49069	7.42627
1.151	6.61069	6.79049	6.61851	6.39696	6.21161	6.24235	6.43537	6.76226	6.53056	6.70439	5.26433	3.05768	3.43353	2.53682	3.0792	5.49893	5.55613	5.98755	7.54121	7.29787	7.53559	7.54109	7.59131	7.29398	7.41988	7.55767	7.49036	7.42592
1.152	6.6105	6.79027	6.61835	6.39676	6.21137	6.24215	6.43521	6.76201	6.53033	6.70413	5.26607	3.05828	3.43428	2.53736	3.0804	5.50021	5.55683	5.98769	7.54088	7.29752	7.53525	7.54076	7.59098	7.29363	7.41952	7.55734	7.49004	7.42557
1.153	6.61031	6.79005	6.61819	6.39656	6.21113	6.24195	6.43504	6.76176	6.53011	6.70388	5.26779	3.05889	3.43504	2.5379	3.08161	5.50149	5.55753	5.98783	7.54054	7.29718	7.53492	7.54043	7.59065	7.29327	7.41916	7.55701	7.48971	7.42521
1.154	6.61012	6.78982	6.61803	6.39635	6.21088	6.24175	6.43487	6.76151	6.52988	6.70362	5.26952	3.05949	3.4358	2.53844	3.08282	5.50276	5.55822	5.98797	7.54021	7.29683	7.53458	7.5401	7.59032	7.29291	7.41879	7.55667	7.48939	7.42486
1.155	6.60993	6.7896	6.61787	6.39615	6.21064	6.24155	6.43471	6.76126	6.52965	6.70336	5.27124	3.0601	3.43656	2.53898	3.08403	5.50402	5.55891	5.98811	7.53987	7.29648	7.53425	7.53977	7.58999	7.29256	7.41843	7.55634	7.48906	7.42451
1.156	6.60974	6.78937	6.6177	6.39595	6.21039	6.24135	6.43454	6.76101	6.52942	6.7031	5.27296	3.0607	3.43731	2.53952	3.08524	5.50528	5.55959	5.98825	7.53954	7.29613	7.53391	7.53945	7.58966	7.2922	7.41806	7.55601	7.48873	7.42415
1.157	6.60955	6.78915	6.61754	6.39574	6.21015	6.24114	6.43437	6.76076	6.5292	6.70284	5.27467	3.06131	3.43807	2.54006	3.08645	5.50654	5.56027	5.98839	7.5392	7.29578	7.53358	7.53912	7.58933	7.29185	7.4177	7.55567	7.4884	7.4238
1.158	6.60936	6.78892	6.61738	6.39554	6.2099	6.24094	6.4342	6.76051	6.52897	6.70258	5.27638	3.06191	3.43883	2.5406	3.08766	5.50779	5.56095	5.98852	7.53886	7.29543	7.53324	7.53879	7.589	7.29149	7.41733	7.55534	7.48808	7.42344
1.159	6.60917	6.78869	6.61721	6.39533	6.20965	6.24073	6.43403	6.76026	6.52874	6.70232	5.27809	3.06251	3.43959	2.54114	3.08886	5.50904	5.56162	5.98865	7.53853	7.29508	7.5329	7.53846	7.58867	7.29113	7.41697	7.55501	7.48775	7.42308
1.16	6.60897	6.78847	6.61705	6.39512	6.2094	6.24053	6.43385	6.76001	6.52851	6.70206	5.27979	3.06312	3.44035	2.54169	3.09007	5.51028	5.56229	5.98878	7.53819	7.29473	7.53257	7.53813	7.58834	7.29077	7.4166	7.55467	7.48742	7.42273
1.161	6.60878	6.78824	6.61688	6.39491	6.20915	6.24032	6.43368	6.75975	6.52828	6.7018	5.28149	3.06372	3.4411	2.54223	3.09128	5.51151	5.56295	5.98891	7.53785	7.29438	7.53223	7.5378	7.588	7.29042	7.41624	7.55434	7.48709	7.42237
1.162	6.60859	6.78801	6.61671	6.3947	6.2089	6.24011	6.43351	6.7595	6.52805	6.70154	5.28319	3.06433	3.44186	2.54277	3.09249	5.51275	5.56361	5.98903	7.53751	7.29403	7.53189	7.53747	7.58767	7.29006	7.41587	7.554	7.48676	7.42202
1.163	6.60839	6.78778	6.61655	6.39449	6.20865	6.2399	6.43333	6.75925	6.52781	6.70128	5.28488	3.06493	3.44262	2.54331	3.0937	5.51397	5.56427	5.98915	7.53718	7.29368	7.53155	7.53714	7.58734	7.2897	7.4155	7.55367	7.48644	7.42166
1.164	6.6082	6.78755	6.61638	6.39428	6.20839	6.23969	6.43316	6.75899	6.52758	6.70101	5.28657	3.06553	3.44338	2.54385	3.09491	5.5152	5.56492	5.98928	7.53684	7.29333	7.53122	7.5368	7.58701	7.28934	7.41514	7.55333	7.48611	7.4213
1.165	6.608	6.78732	6.61621	6.39407	6.20814	6.23948	6.43298	6.75874	6.52735	6.70075	5.28825	3.06614	3.44413	2.54439	3.09612	5.51641	5.56557	5.9894	7.5365	7.29298	7.53088	7.53647	7.58667	7.28898	7.41477	7.553	7.48578	7.42094
1.166	6.6078	6.78709	6.61604	6.39386	6.20788	6.23927	6.43281	6.75848	6.52711	6.70049	5.28994	3.06674	3.44489	2.54493	3.09732	5.51763	5.56622	5.98951	7.53616	7.29262	7.53054	7.53614	7.58634	7.28862	7.4144	7.55266	7.48545	7.42059
1.167	6.60761	6.78686	6.61587	6.39365	6.20763	6.23905	6.43263	6.75823	6.52688	6.70022	5.29161	3.06735	3.44565	2.54547	3.09853	5.51883	5.56686	5.98963	7.53582	7.29227	7.5302	7.53581	7.586	7.28826	7.41403	7.55233	7.48512	7.42023
1.168	6.60741	6.78663	6.6157	6.39344	6.20737	6.23884	6.43245	6.75797	6.52664	6.69996	5.29329	3.06795	3.44641	2.54601	3.09974	5.52004	5.5675	5.98974	7.53548	7.29192	7.52986	7.53548	7.58567	7.2879	7.41366	7.55199	7.48479	7.41987
1.169	6.60721	6.7864	6.61553	6.39322	6.20712	6.23862	6.43227	6.75771	6.52641	6.69969	5.29496	3.06856	3.44716	2.54655	3.10095	5.52124	5.56814	5.98986	7.53514	7.29157	7.52952	7.53514	7.58534	7.28754	7.4133	7.55165	7.48446	7.41951
1.17	6.60701	6.78616	6.61536	6.39301	6.20686	6.23841	6.43209	6.75746	6.52617	6.69943	5.29663	3.06916	3.44792	2.54709	3.10216	5.52243	5.56877	5.98997	7.5348	7.29121	7.52918	7.53481	7.585	7.28718	7.41293	7.55132	7.48413	7.41915
1.171	6.60681	6.78593	6.61519	6.39279	6.2066	6.23819	6.43191	6.7572	6.52593	6.69916	5.29829	3.06976	3.44868	2.54763	3.10337	5.52362	5.5694	5.99008	7.53446	7.29086	7.52884	7.53448	7.58467	7.28682	7.41256	7.55098	7.48379	7.41879
1.172	6.60661	6.7857	6.61502	6.39257	6.20634	6.23797	6.43173	6.75694	6.52569	6.69889	5.29995	3.07037	3.44944	2.54817	3.10457	5.5248	5.57002	5.99018	7.53412	7.2905	7.5285	7.53414	7.58433	7.28645	7.41219	7.55064	7.48346	7.41843
1.173	6.60641	6.78546	6.61485	6.39236	6.20608	6.23775	6.43155	6.75668	6.52546	6.69863	5.30161	3.07097	3.45019	2.54871	3.10578	5.52598	5.57064	5.99029	7.53378	7.29015	7.52816	7.53381	7.58399	7.28609	7.41182	7.5503	7.48313	7.41807
1.174	6.60621	6.78523	6.61467	6.39214	6.20582	6.23753	6.43137	6.75642	6.52522	6.69836	5.30326	3.07158	3.45095	2.54926	3.10699	5.52716	5.57126	5.99039	7.53344	7.2898	7.52782	7.53348	7.58366	7.28573	7.41145	7.54996	7.4828	7.41771
1.175	6.60601	6.785	6.6145	6.39192	6.20555	6.23731	6.43118	6.75616	6.52498	6.69809	5.30491	3.07218	3.45171	2.5498	3.1082	5.52833	5.57187	5.99049	7.5331	7.28944	7.52748	7.53314	7.58332	7.28537	7.41108	7.54963	7.48247	7.41735
1.176	6.60581	6.78476	6.61432	6.3917	6.20529	6.23709	6.431	6.7559	6.52474	6.69782	5.30655	3.07278	3.45246	2.55034	3.10941	5.52949	5.57248	5.99059	7.53276	7.28909	7.52714	7.53281	7.58299	7.285	7.41071	7.54929	7.48213	7.41699
1.177	6.6056	6.78452	6.61415	6.39148	6.20503	6.23687	6.43081	6.75564	6.52449	6.69755	5.3082	3.07339	3.45322	2.55088	3.11061	5.53066	5.57309	5.99069	7.53242	7.28873	7.52679	7.53247	7.58265	7.28464	7.41033	7.54895	7.4818	7.41663
1.178	6.6054	6.78429	6.61397	6.39126	6.20476	6.23664	6.43063	6.75538	6.52425	6.69728	5.30983	3.07399	3.45398	2.55142	3.11182	5.53181	5.57369	5.99079	7.53207	7.28837	7.52645	7.53214	7.58231	7.28428	7.40996	7.54861	7.48147	7.41627
1.179	6.6052	6.78405	6.6138	6.39104	6.2045	6.23642	6.43044	6.75512	6.52401	6.69701	5.31147	3.0746	3.45474	2.55196	3.11303	5.53296	5.57429	5.99088	7.53173	7.28802	7.52611	7.5318	7.58198	7.28391	7.40959	7.54827	7.48113	7.41591
1.18	6.60499	6.78381	6.61362	6.39082	6.20423	6.23619	6.43025	6.75486	6.52377	6.69674	5.3131	3.0752	3.45549	2.5525	3.11424	5.53411	5.57489	5.99097	7.53139	7.28766	7.52577	7.53147	7.58164	7.28355	7.40922	7.54793	7.4808	7.41554
1.181	6.60479	6.78358	6.61344	6.3906	6.20396	6.23597	6.43006	6.75459	6.52352	6.69647	5.31473	3.0758	3.45625	2.55304	3.11545	5.53525	5.57548	5.99106	7.53105	7.2873	7.52542	7.53113	7.5813	7.28319	7.40885	7.54759	7.48047	7.41518
1.182	6.60458	6.78334	6.61327	6.39037	6.2037	6.23574	6.42988	6.75433	6.52328	6.69619	5.31635	3.07641	3.45701	2.55358	3.11665	5.53639	5.57607	5.99115	7.5307	7.28695	7.52508	7.5308	7.58096	7.28282	7.40847	7.54725	7.48013	7.41482
1.183	6.60438	6.7831	6.61309	6.39015	6.20343	6.23551	6.42969	6.75407	6.52303	6.69592	5.31797	3.07701	3.45776	2.55412	3.11786	5.53752	5.57666	5.99124	7.53036	7.28659	7.52474	7.53046	7.58062	7.28246	7.4081	7.54691	7.4798	7.41446
1.184	6.60417	6.78286	6.61291	6.38992	6.20316	6.23528	6.4295	6.7538	6.52279	6.69565	5.31959	3.07762	3.45852	2.55466	3.11907	5.53865	5.57724	5.99133	7.53002	7.28623	7.52439	7.53012	7.58028	7.28209	7.40773	7.54657	7.47946	7.41409
1.185	6.60396	6.78262	6.61273	6.3897	6.20289	6.23505	6.42931	6.75354	6.52254	6.69537	5.3212	3.07822	3.45928	2.5552	3.12028	5.53977	5.57782	5.99141	7.52967	7.28587	7.52405	7.52978	7.57995	7.28172	7.40735	7.54623	7.47913	7.41373
1.186	6.60376	6.78238	6.61255	6.38947	6.20262	6.23482	6.42911	6.75327	6.52229	6.6951	5.32281	3.07882	3.46004	2.55574	3.12149	5.54089	5.57839	5.99149	7.52933	7.28551	7.5237	7.52945	7.57961	7.28136	7.40698	7.54589	7.47879	7.41336
1.187	6.60355	6.78214	6.61237	6.38925	6.20234	6.23459	6.42892	6.75301	6.52205	6.69483	5.32441	3.07943	3.46079	2.55629	3.12269	5.54201	5.57896	5.99157	7.52898	7.28516	7.52336	7.52911	7.57927	7.28099	7.40661	7.54554	7.47846	7.413
1.188	6.60334	6.7819	6.61219	6.38902	6.20207	6.23436	6.42873	6.75274	6.5218	6.69455	5.32601	3.08003	3.46155	2.55683	3.1239	5.54312	5.57953	5.99165	7.52864	7.2848	7.52301	7.52877	7.57893	7.28063	7.40623	7.5452	7.47812	7.41264
1.189	6.60313	6.78166	6.61201	6.38879	6.2018	6.23412	6.42853	6.75248	6.52155	6.69427	5.32761	3.08064	3.46231	2.55737	3.12511	5.54422	5.5801	5.99173	7.52829	7.28444	7.52267	7.52843	7.57859	7.28026	7.40586	7.54486	7.47778	7.41227
1.19	6.60292	6.78142	6.61182	6.38856	6.20152	6.23389	6.42834	6.75221	6.5213	6.694	5.3292	3.08124	3.46306	2.55791	3.12632	5.54532	5.58066	5.9918	7.52795	7.28408	7.52232	7.5281	7.57825	7.27989	7.40548	7.54452	7.47745	7.41191
1.191	6.60271	6.78118	6.61164	6.38833	6.20125	6.23365	6.42814	6.75194	6.52105	6.69372	5.33079	3.08184	3.46382	2.55845	3.12752	5.54642	5.58122	5.99188	7.5276	7.28372	7.52198	7.52776	7.57791	7.27952	7.40511	7.54417	7.47711	7.41154
1.192	6.6025	6.78093	6.61146	6.3881	6.20097	6.23342	6.42795	6.75168	6.5208	6.69344	5.33238	3.08245	3.46458	2.55899	3.12873	5.54751	5.58177	5.99195	7.52726	7.28336	7.52163	7.52742	7.57757	7.27916	7.40473	7.54383	7.47677	7.41118
1.193	6.60229	6.78069	6.61127	6.38787	6.20069	6.23318	6.42775	6.75141	6.52055	6.69317	5.33396	3.08305	3.46533	2.55953	3.12994	5.5486	5.58232	5.99202	7.52691	7.283	7.52129	7.52708	7.57722	7.27879	7.40435	7.54349	7.47643	7.41081
1.194	6.60208	6.78045	6.61109	6.38764	6.20042	6.23294	6.42755	6.75114	6.5203	6.69289	5.33554	3.08366	3.46609	2.56007	3.13115	5.54968	5.58287	5.99209	7.52656	7.28264	7.52094	7.52674	7.57688	7.27842	7.40398	7.54314	7.4761	7.41044
1.195	6.60186	6.7802	6.61091	6.38741	6.20014	6.2327	6.42735	6.75087	6.52004	6.69261	5.33712	3.08426	3.46685	2.56061	3.13236	5.55075	5.58341	5.99216	7.52622	7.28228	7.52059	7.5264	7.57654	7.27805	7.4036	7.5428	7.47576	7.41008
1.196	6.60165	6.77996	6.61072	6.38717	6.19986	6.23246	6.42716	6.7506	6.51979	6.69233	5.33869	3.08486	3.4676	2.56115	3.13356	5.55183	5.58396	5.99222	7.52587	7.28191	7.52025	7.52606	7.5762	7.27768	7.40322	7.54246	7.47542	7.40971
1.197	6.60144	6.77971	6.61053	6.38694	6.19958	6.23222	6.42696	6.75033	6.51954	6.69205	5.34025	3.08547	3.46836	2.56169	3.13477	5.5529	5.58449	5.99229	7.52552	7.28155	7.5199	7.52572	7.57586	7.27731	7.40285	7.54211	7.47508	7.40934
1.198	6.60123	6.77947	6.61035	6.38671	6.1993	6.23198	6.42676	6.75006	6.51928	6.69177	5.34182	3.08607	3.46912	2.56223	3.13598	5.55396	5.58503	5.99235	7.52517	7.28119	7.51955	7.52538	7.57551	7.27694	7.40247	7.54177	7.47474	7.40898
1.199	6.60101	6.77922	6.61016	6.38647	6.19902	6.23174	6.42655	6.74979	6.51903	6.69149	5.34338	3.08668	3.46987	2.56278	3.13719	5.55502	5.58556	5.99241	7.52483	7.28083	7.5192	7.52504	7.57517	7.27657	7.40209	7.54142	7.4744	7.40861
1.2	6.6008	6.77897	6.60997	6.38624	6.19874	6.2315	6.42635	6.74952	6.51877	6.69121	5.34493	3.08728	3.47063	2.56332	3.13839	5.55607	5.58609	5.99247	7.52448	7.28047	7.51885	7.5247	7.57483	7.2762	7.40171	7.54108	7.47406	7.40824
1.201	6.60058	6.77873	6.60979	6.386	6.19845	6.23125	6.42615	6.74925	6.51852	6.69093	5.34648	3.08788	3.47139	2.56386	3.1396	5.55712	5.58661	5.99253	7.52413	7.2801	7.51851	7.52435	7.57449	7.27583	7.40134	7.54073	7.47373	7.40787
1.202	6.60037	6.77848	6.6096	6.38576	6.19817	6.23101	6.42595	6.74897	6.51826	6.69064	5.34803	3.08849	3.47214	2.5644	3.14081	5.55817	5.58713	5.99258	7.52378	7.27974	7.51816	7.52401	7.57414	7.27546	7.40096	7.54038	7.47339	7.4075
1.203	6.60015	6.77823	6.60941	6.38553	6.19788	6.23076	6.42574	6.7487	6.518	6.69036	5.34958	3.08909	3.4729	2.56494	3.14202	5.55921	5.58765	5.99264	7.52343	7.27938	7.51781	7.52367	7.5738	7.27509	7.40058	7.54004	7.47305	7.40713
1.204	6.59993	6.77799	6.60922	6.38529	6.1976	6.23051	6.42554	6.74843	6.51775	6.69008	5.35112	3.0897	3.47366	2.56548	3.14322	5.56024	5.58817	5.99269	7.52308	7.27901	7.51746	7.52333	7.57346	7.27472	7.4002	7.53969	7.4727	7.40677
1.205	6.59972	6.77774	6.60903	6.38505	6.19731	6.23027	6.42533	6.74815	6.51749	6.6898	5.35266	3.0903	3.47441	2.56602	3.14443	5.56128	5.58868	5.99274	7.52273	7.27865	7.51711	7.52299	7.57311	7.27435	7.39982	7.53935	7.47236	7.4064
1.206	6.5995	6.77749	6.60884	6.38481	6.19703	6.23002	6.42513	6.74788	6.51723	6.68951	5.35419	3.0909	3.47517	2.56656	3.14564	5.5623	5.58919	5.99279	7.52238	7.27828	7.51676	7.52264	7.57277	7.27397	7.39944	7.539	7.47202	7.40603
1.207	6.59928	6.77724	6.60865	6.38457	6.19674	6.22977	6.42492	6.74761	6.51697	6.68923	5.35572	3.09151	3.47593	2.5671	3.14685	5.56333	5.58969	5.99284	7.52203	7.27792	7.51641	7.5223	7.57242	7.2736	7.39906	7.53865	7.47168	7.40566
1.208	6.59906	6.77699	6.60845	6.38433	6.19645	6.22952	6.42471	6.74733	6.51671	6.68894	5.35724	3.09211	3.47668	2.56764	3.14805	5.56434	5.59019	5.99288	7.52168	7.27755	7.51606	7.52196	7.57208	7.27323	7.39868	7.5383	7.47134	7.40529
1.209	6.59884	6.77674	6.60826	6.38409	6.19616	6.22927	6.4245	6.74706	6.51645	6.68866	5.35877	3.09272	3.47744	2.56818	3.14926	5.56536	5.59069	5.99293	7.52133	7.27719	7.51571	7.52161	7.57173	7.27286	7.3983	7.53796	7.471	7.40492
1.21	6.59862	6.77649	6.60807	6.38384	6.19587	6.22902	6.4243	6.74678	6.51619	6.68837	5.36028	3.09332	3.4782	2.56872	3.15047	5.56637	5.59119	5.99297	7.52098	7.27682	7.51536	7.52127	7.57139	7.27248	7.39792	7.53761	7.47066	7.40454
1.211	6.5984	6.77624	6.60788	6.3836	6.19558	6.22876	6.42409	6.7465	6.51593	6.68808	5.3618	3.09392	3.47895	2.56926	3.15168	5.56737	5.59168	5.99301	7.52063	7.27646	7.51501	7.52093	7.57104	7.27211	7.39754	7.53726	7.47031	7.40417
1.212	6.59818	6.77598	6.60768	6.38336	6.19529	6.22851	6.42388	6.74623	6.51566	6.6878	5.36331	3.09453	3.47971	2.56981	3.15288	5.56837	5.59217	5.99305	7.52028	7.27609	7.51466	7.52058	7.57069	7.27174	7.39716	7.53691	7.46997	7.4038
1.213	6.59796	6.77573	6.60749	6.38311	6.195	6.22826	6.42367	6.74595	6.5154	6.68751	5.36481	3.09513	3.48046	2.57035	3.15409	5.56937	5.59266	5.99309	7.51993	7.27572	7.5143	7.52024	7.57035	7.27136	7.39677	7.53656	7.46963	7.40343
1.214	6.59774	6.77548	6.60729	6.38287	6.19471	6.228	6.42345	6.74567	6.51514	6.68722	5.36632	3.09573	3.48122	2.57089	3.1553	5.57036	5.59314	5.99313	7.51958	7.27536	7.51395	7.51989	7.57	7.27099	7.39639	7.53621	7.46929	7.40306
1.215	6.59752	6.77523	6.6071	6.38262	6.19441	6.22774	6.42324	6.74539	6.51487	6.68693	5.36781	3.09634	3.48198	2.57143	3.1565	5.57135	5.59362	5.99317	7.51922	7.27499	7.5136	7.51955	7.56965	7.27061	7.39601	7.53587	7.46894	7.40269
1.216	6.59729	6.77497	6.6069	6.38238	6.19412	6.22749	6.42303	6.74512	6.51461	6.68664	5.36931	3.09694	3.48273	2.57197	3.15771	5.57233	5.5941	5.9932	7.51887	7.27462	7.51325	7.5192	7.56931	7.27024	7.39563	7.53552	7.4686	7.40231
1.217	6.59707	6.77472	6.60671	6.38213	6.19382	6.22723	6.42282	6.74484	6.51434	6.68636	5.3708	3.09755	3.48349	2.57251	3.15892	5.57331	5.59457	5.99323	7.51852	7.27426	7.5129	7.51886	7.56896	7.26986	7.39524	7.53517	7.46826	7.40194
1.218	6.59685	6.77447	6.60651	6.38189	6.19353	6.22697	6.4226	6.74456	6.51408	6.68607	5.37229	3.09815	3.48424	2.57305	3.16013	5.57428	5.59504	5.99326	7.51817	7.27389	7.51254	7.51851	7.56861	7.26949	7.39486	7.53482	7.46791	7.40157
1.219	6.59662	6.77421	6.60631	6.38164	6.19323	6.22671	6.42239	6.74428	6.51381	6.68578	5.37377	3.09875	3.485	2.57359	3.16133	5.57525	5.59551	5.99329	7.51781	7.27352	7.51219	7.51816	7.56827	7.26911	7.39448	7.53447	7.46757	7.4012
1.22	6.5964	6.77396	6.60612	6.38139	6.19293	6.22645	6.42217	6.744	6.51355	6.68549	5.37525	3.09936	3.48576	2.57413	3.16254	5.57622	5.59597	5.99332	7.51746	7.27315	7.51184	7.51782	7.56792	7.26873	7.39409	7.53412	7.46722	7.40082
1.221	6.59617	6.7737	6.60592	6.38114	6.19264	6.22619	6.42196	6.74372	6.51328	6.68519	5.37672	3.09996	3.48651	2.57467	3.16375	5.57718	5.59643	5.99335	7.51711	7.27278	7.51148	7.51747	7.56757	7.26836	7.39371	7.53377	7.46688	7.40045
1.222	6.59595	6.77345	6.60572	6.38089	6.19234	6.22593	6.42174	6.74344	6.51301	6.6849	5.3782	3.10057	3.48727	2.57521	3.16495	5.57813	5.59689	5.99337	7.51675	7.27241	7.51113	7.51712	7.56722	7.26798	7.39333	7.53341	7.46653	7.40007
1.223	6.59572	6.77319	6.60552	6.38064	6.19204	6.22567	6.42152	6.74315	6.51274	6.68461	5.37966	3.10117	3.48802	2.57575	3.16616	5.57908	5.59735	5.9934	7.5164	7.27204	7.51078	7.51678	7.56687	7.26761	7.39294	7.53306	7.46619	7.3997
1.224	6.5955	6.77293	6.60532	6.38039	6.19174	6.2254	6.4213	6.74287	6.51247	6.68432	5.38113	3.10177	3.48878	2.5763	3.16737	5.58003	5.5978	5.99342	7.51604	7.27167	7.51042	7.51643	7.56652	7.26723	7.39256	7.53271	7.46584	7.39933
1.225	6.59527	6.77268	6.60512	6.38014	6.19144	6.22514	6.42108	6.74259	6.5122	6.68403	5.38259	3.10238	3.48954	2.57684	3.16857	5.58097	5.59825	5.99344	7.51569	7.2713	7.51007	7.51608	7.56617	7.26685	7.39217	7.53236	7.4655	7.39895
1.226	6.59504	6.77242	6.60492	6.37989	6.19114	6.22488	6.42087	6.74231	6.51193	6.68373	5.38404	3.10298	3.49029	2.57738	3.16978	5.58191	5.59869	5.99346	7.51533	7.27093	7.50971	7.51574	7.56582	7.26647	7.39179	7.53201	7.46515	7.39858
1.227	6.59481	6.77216	6.60472	6.37963	6.19083	6.22461	6.42065	6.74202	6.51166	6.68344	5.3855	3.10358	3.49105	2.57792	3.17099	5.58285	5.59914	5.99348	7.51498	7.27056	7.50936	7.51539	7.56547	7.26609	7.3914	7.53166	7.4648	7.3982
1.228	6.59458	6.7719	6.60452	6.37938	6.19053	6.22434	6.42042	6.74174	6.51139	6.68314	5.38694	3.10419	3.4918	2.57846	3.1722	5.58378	5.59958	5.9935	7.51462	7.27019	7.509	7.51504	7.56512	7.26572	7.39102	7.5313	7.46446	7.39782
1.229	6.59436	6.77164	6.60431	6.37913	6.19023	6.22408	6.4202	6.74146	6.51112	6.68285	5.38839	3.10479	3.49256	2.579	3.1734	5.5847	5.60002	5.99351	7.51427	7.26982	7.50865	7.51469	7.56477	7.26534	7.39063	7.53095	7.46411	7.39745
1.23	6.59413	6.77138	6.60411	6.37887	6.18992	6.22381	6.41998	6.74117	6.51085	6.68255	5.38983	3.1054	3.49332	2.57954	3.17461	5.58562	5.60045	5.99353	7.51391	7.26945	7.50829	7.51434	7.56442	7.26496	7.39024	7.5306	7.46376	7.39707
1.231	6.5939	6.77113	6.60391	6.37862	6.18962	6.22354	6.41976	6.74089	6.51057	6.68226	5.39126	3.106	3.49407	2.58008	3.17582	5.58654	5.60088	5.99354	7.51356	7.26908	7.50793	7.51399	7.56407	7.26458	7.38986	7.53024	7.46341	7.3967
1.232	6.59367	6.77087	6.6037	6.37836	6.18931	6.22327	6.41954	6.7406	6.5103	6.68196	5.3927	3.1066	3.49483	2.58062	3.17702	5.58745	5.60131	5.99355	7.5132	7.26871	7.50758	7.51364	7.56372	7.2642	7.38947	7.52989	7.46307	7.39632
1.233	6.59344	6.7706	6.6035	6.3781	6.18901	6.223	6.41931	6.74032	6.51003	6.68167	5.39413	3.10721	3.49558	2.58116	3.17823	5.58836	5.60174	5.99356	7.51284	7.26834	7.50722	7.51329	7.56337	7.26382	7.38908	7.52954	7.46272	7.39594
1.234	6.59321	6.77034	6.6033	6.37785	6.1887	6.22273	6.41909	6.74003	6.50975	6.68137	5.39555	3.10781	3.49634	2.5817	3.17944	5.58927	5.60216	5.99357	7.51249	7.26796	7.50686	7.51294	7.56302	7.26344	7.38869	7.52918	7.46237	7.39557
1.235	6.59297	6.77008	6.60309	6.37759	6.18839	6.22246	6.41886	6.73975	6.50948	6.68107	5.39697	3.10841	3.49709	2.58224	3.18064	5.59017	5.60258	5.99357	7.51213	7.26759	7.50651	7.51259	7.56267	7.26306	7.38831	7.52883	7.46202	7.39519
1.236	6.59274	6.76982	6.60289	6.37733	6.18808	6.22218	6.41864	6.73946	6.5092	6.68077	5.39839	3.10902	3.49785	2.58278	3.18185	5.59106	5.60299	5.99358	7.51177	7.26722	7.50615	7.51224	7.56232	7.26268	7.38792	7.52848	7.46167	7.39481
1.237	6.59251	6.76956	6.60268	6.37707	6.18777	6.22191	6.41841	6.73917	6.50893	6.68048	5.3998	3.10962	3.49861	2.58333	3.18306	5.59195	5.60341	5.99358	7.51141	7.26684	7.50579	7.51189	7.56196	7.2623	7.38753	7.52812	7.46132	7.39443
1.238	6.59228	6.7693	6.60247	6.37681	6.18746	6.22164	6.41818	6.73888	6.50865	6.68018	5.40121	3.11022	3.49936	2.58387	3.18426	5.59284	5.60382	5.99359	7.51106	7.26647	7.50543	7.51154	7.56161	7.26192	7.38714	7.52777	7.46098	7.39405
1.239	6.59204	6.76903	6.60227	6.37655	6.18715	6.22136	6.41796	6.7386	6.50837	6.67988	5.40262	3.11083	3.50012	2.58441	3.18547	5.59372	5.60423	5.99359	7.5107	7.2661	7.50508	7.51119	7.56126	7.26154	7.38675	7.52741	7.46063	7.39368
1.24	6.59181	6.76877	6.60206	6.37629	6.18684	6.22109	6.41773	6.73831	6.5081	6.67958	5.40402	3.11143	3.50087	2.58495	3.18668	5.5946	5.60463	5.99359	7.51034	7.26572	7.50472	7.51084	7.56091	7.26115	7.38636	7.52706	7.46028	7.3933
1.241	6.59157	6.76851	6.60185	6.37603	6.18653	6.22081	6.4175	6.73802	6.50782	6.67928	5.40541	3.11204	3.50163	2.58549	3.18788	5.59548	5.60503	5.99359	7.50998	7.26535	7.50436	7.51049	7.56055	7.26077	7.38598	7.5267	7.45993	7.39292
1.242	6.59134	6.76824	6.60164	6.37577	6.18622	6.22053	6.41727	6.73773	6.50754	6.67898	5.40681	3.11264	3.50238	2.58603	3.18909	5.59635	5.60543	5.99358	7.50962	7.26497	7.504	7.51014	7.5602	7.26039	7.38559	7.52634	7.45958	7.39254
1.243	6.59111	6.76798	6.60143	6.37551	6.1859	6.22026	6.41704	6.73744	6.50726	6.67868	5.4082	3.11324	3.50314	2.58657	3.1903	5.59721	5.60583	5.99358	7.50926	7.2646	7.50364	7.50978	7.55985	7.26001	7.3852	7.52599	7.45923	7.39216
1.244	6.59087	6.76771	6.60123	6.37525	6.18559	6.21998	6.41681	6.73715	6.50698	6.67838	5.40958	3.11385	3.50389	2.58711	3.1915	5.59807	5.60623	5.99357	7.5089	7.26422	7.50328	7.50943	7.55949	7.25963	7.38481	7.52563	7.45888	7.39178
1.245	6.59063	6.76745	6.60102	6.37498	6.18528	6.2197	6.41658	6.73686	6.5067	6.67808	5.41096	3.11445	3.50465	2.58765	3.19271	5.59893	5.60662	5.99357	7.50854	7.26385	7.50292	7.50908	7.55914	7.25924	7.38442	7.52527	7.45853	7.3914
1.246	6.5904	6.76718	6.60081	6.37472	6.18496	6.21942	6.41635	6.73657	6.50642	6.67777	5.41234	3.11505	3.5054	2.58819	3.19391	5.59979	5.607	5.99356	7.50818	7.26347	7.50256	7.50873	7.55878	7.25886	7.38403	7.52492	7.45817	7.39102
1.247	6.59016	6.76692	6.6006	6.37445	6.18465	6.21914	6.41611	6.73628	6.50614	6.67747	5.41371	3.11566	3.50616	2.58873	3.19512	5.60064	5.60739	5.99355	7.50782	7.2631	7.5022	7.50837	7.55843	7.25848	7.38363	7.52456	7.45782	7.39064
1.248	6.58992	6.76665	6.60038	6.37419	6.18433	6.21885	6.41588	6.73599	6.50586	6.67717	5.41508	3.11626	3.50691	2.58927	3.19633	5.60148	5.60777	5.99354	7.50746	7.26272	7.50184	7.50802	7.55807	7.25809	7.38324	7.5242	7.45747	7.39026
1.249	6.58968	6.76639	6.60017	6.37392	6.18401	6.21857	6.41565	6.73569	6.50557	6.67686	5.41645	3.11686	3.50767	2.58982	3.19753	5.60232	5.60815	5.99353	7.5071	7.26234	7.50148	7.50767	7.55772	7.25771	7.38285	7.52385	7.45712	7.38988
1.25	6.58945	6.76612	6.59996	6.37366	6.18369	6.21829	6.41541	6.7354	6.50529	6.67656	5.41781	3.11747	3.50842	2.59036	3.19874	5.60316	5.60853	5.99351	7.50674	7.26197	7.50112	7.50731	7.55736	7.25732	7.38246	7.52349	7.45677	7.38949
1.251	6.58921	6.76585	6.59975	6.37339	6.18338	6.21801	6.41518	6.73511	6.50501	6.67626	5.41917	3.11807	3.50918	2.5909	3.19995	5.60399	5.60891	5.9935	7.50638	7.26159	7.50076	7.50696	7.55701	7.25694	7.38207	7.52313	7.45641	7.38911
1.252	6.58897	6.76558	6.59954	6.37312	6.18306	6.21772	6.41494	6.73482	6.50472	6.67595	5.42052	3.11867	3.50993	2.59144	3.20115	5.60482	5.60928	5.99348	7.50602	7.26121	7.5004	7.50661	7.55665	7.25655	7.38168	7.52277	7.45606	7.38873
1.253	6.58873	6.76532	6.59932	6.37285	6.18274	6.21744	6.41471	6.73452	6.50444	6.67565	5.42187	3.11928	3.51069	2.59198	3.20236	5.60564	5.60965	5.99347	7.50566	7.26084	7.50004	7.50625	7.5563	7.25617	7.38128	7.52241	7.45571	7.38835
1.254	6.58849	6.76505	6.59911	6.37259	6.18242	6.21715	6.41447	6.73423	6.50415	6.67534	5.42322	3.11988	3.51144	2.59252	3.20356	5.60647	5.61001	5.99345	7.5053	7.26046	7.49968	7.5059	7.55594	7.25578	7.38089	7.52206	7.45536	7.38797
1.255	6.58825	6.76478	6.59889	6.37232	6.18209	6.21686	6.41423	6.73393	6.50387	6.67504	5.42456	3.12049	3.5122	2.59306	3.20477	5.60728	5.61038	5.99343	7.50494	7.26008	7.49931	7.50554	7.55558	7.2554	7.3805	7.5217	7.455	7.38758
1.256	6.58801	6.76451	6.59868	6.37205	6.18177	6.21658	6.41399	6.73364	6.50358	6.67473	5.4259	3.12109	3.51295	2.5936	3.20598	5.60809	5.61074	5.99341	7.50457	7.2597	7.49895	7.50519	7.55523	7.25501	7.38011	7.52134	7.45465	7.3872
1.257	6.58777	6.76424	6.59846	6.37178	6.18145	6.21629	6.41376	6.73334	6.5033	6.67442	5.42723	3.12169	3.51371	2.59414	3.20718	5.6089	5.6111	5.99339	7.50421	7.25932	7.49859	7.50483	7.55487	7.25463	7.37971	7.52098	7.4543	7.38682
1.258	6.58753	6.76397	6.59825	6.37151	6.18113	6.216	6.41352	6.73305	6.50301	6.67412	5.42856	3.1223	3.51446	2.59468	3.20839	5.60971	5.61145	5.99336	7.50385	7.25895	7.49823	7.50448	7.55451	7.25424	7.37932	7.52062	7.45394	7.38643
1.259	6.58728	6.7637	6.59803	6.37124	6.1808	6.21571	6.41328	6.73275	6.50272	6.67381	5.42989	3.1229	3.51522	2.59522	3.20959	5.61051	5.6118	5.99334	7.50349	7.25857	7.49786	7.50412	7.55416	7.25385	7.37893	7.52026	7.45359	7.38605
1.26	6.58704	6.76343	6.59782	6.37096	6.18048	6.21542	6.41304	6.73246	6.50243	6.6735	5.43121	3.1235	3.51597	2.59576	3.2108	5.6113	5.61215	5.99331	7.50312	7.25819	7.4975	7.50377	7.5538	7.25347	7.37853	7.5199	7.45323	7.38567
1.261	6.5868	6.76316	6.5976	6.37069	6.18015	6.21513	6.4128	6.73216	6.50215	6.67319	5.43253	3.12411	3.51673	2.5963	3.21201	5.6121	5.6125	5.99328	7.50276	7.25781	7.49714	7.50341	7.55344	7.25308	7.37814	7.51954	7.45288	7.38528
1.262	6.58655	6.76288	6.59738	6.37042	6.17983	6.21484	6.41255	6.73186	6.50186	6.67288	5.43384	3.12471	3.51748	2.59685	3.21321	5.61288	5.61285	5.99326	7.5024	7.25743	7.49677	7.50305	7.55308	7.25269	7.37774	7.51918	7.45252	7.3849
1.263	6.58631	6.76261	6.59717	6.37014	6.1795	6.21454	6.41231	6.73157	6.50157	6.67257	5.43515	3.12531	3.51824	2.59739	3.21442	5.61367	5.61319	5.99323	7.50203	7.25705	7.49641	7.5027	7.55273	7.25231	7.37735	7.51882	7.45217	7.38451
1.264	6.58607	6.76234	6.59695	6.36987	6.17918	6.21425	6.41207	6.73127	6.50128	6.67226	5.43646	3.12592	3.51899	2.59793	3.21562	5.61445	5.61353	5.9932	7.50167	7.25667	7.49605	7.50234	7.55237	7.25192	7.37695	7.51846	7.45181	7.38413
1.265	6.58582	6.76207	6.59673	6.3696	6.17885	6.21396	6.41183	6.73097	6.50099	6.67195	5.43776	3.12652	3.51975	2.59847	3.21683	5.61522	5.61387	5.99316	7.5013	7.25629	7.49568	7.50198	7.55201	7.25153	7.37656	7.5181	7.45146	7.38374
1.266	6.58558	6.76179	6.59651	6.36932	6.17852	6.21366	6.41158	6.73067	6.5007	6.67164	5.43906	3.12712	3.5205	2.59901	3.21804	5.616	5.6142	5.99313	7.50094	7.25591	7.49532	7.50163	7.55165	7.25114	7.37616	7.51773	7.4511	7.38336
1.267	6.58533	6.76152	6.59629	6.36905	6.17819	6.21337	6.41134	6.73037	6.50041	6.67133	5.44035	3.12773	3.52126	2.59955	3.21924	5.61677	5.61453	5.99309	7.50057	7.25553	7.49495	7.50127	7.55129	7.25075	7.37577	7.51737	7.45075	7.38297
1.268	6.58508	6.76125	6.59607	6.36877	6.17786	6.21307	6.41109	6.73007	6.50011	6.67102	5.44164	3.12833	3.52201	2.60009	3.22045	5.61753	5.61486	5.99306	7.50021	7.25514	7.49459	7.50091	7.55093	7.25036	7.37537	7.51701	7.45039	7.38259
1.269	6.58484	6.76097	6.59585	6.36849	6.17753	6.21277	6.41085	6.72977	6.49982	6.67071	5.44293	3.12893	3.52277	2.60063	3.22165	5.61829	5.61519	5.99302	7.49984	7.25476	7.49422	7.50055	7.55057	7.24997	7.37497	7.51665	7.45003	7.3822
1.27	6.58459	6.7607	6.59563	6.36821	6.1772	6.21248	6.4106	6.72947	6.49953	6.6704	5.44421	3.12954	3.52352	2.60117	3.22286	5.61905	5.61551	5.99298	7.49948	7.25438	7.49386	7.50019	7.55021	7.24958	7.37458	7.51629	7.44968	7.38182
1.271	6.58434	6.76042	6.59541	6.36794	6.17687	6.21218	6.41036	6.72917	6.49924	6.67009	5.44549	3.13014	3.52427	2.60171	3.22406	5.6198	5.61584	5.99294	7.49911	7.254	7.49349	7.49984	7.54985	7.24919	7.37418	7.51592	7.44932	7.38143
1.272	6.5841	6.76015	6.59519	6.36766	6.17654	6.21188	6.41011	6.72887	6.49894	6.66977	5.44677	3.13074	3.52503	2.60225	3.22527	5.62055	5.61616	5.9929	7.49875	7.25362	7.49313	7.49948	7.54949	7.2488	7.37378	7.51556	7.44896	7.38104
1.273	6.58385	6.75987	6.59496	6.36738	6.17621	6.21158	6.40986	6.72857	6.49865	6.66946	5.44804	3.13135	3.52578	2.60279	3.22648	5.62129	5.61647	5.99286	7.49838	7.25323	7.49276	7.49912	7.54913	7.24841	7.37339	7.5152	7.44861	7.38066
1.274	6.5836	6.7596	6.59474	6.3671	6.17587	6.21128	6.40961	6.72827	6.49835	6.66915	5.4493	3.13195	3.52654	2.60333	3.22768	5.62203	5.61679	5.99282	7.49802	7.25285	7.49239	7.49876	7.54877	7.24802	7.37299	7.51483	7.44825	7.38027
1.275	6.58335	6.75932	6.59452	6.36682	6.17554	6.21098	6.40936	6.72797	6.49806	6.66883	5.45057	3.13255	3.52729	2.60388	3.22889	5.62277	5.6171	5.99277	7.49765	7.25247	7.49203	7.4984	7.54841	7.24763	7.37259	7.51447	7.44789	7.37988
1.276	6.5831	6.75904	6.5943	6.36654	6.1752	6.21068	6.40911	6.72767	6.49776	6.66852	5.45182	3.13316	3.52805	2.60442	3.23009	5.6235	5.61741	5.99273	7.49728	7.25209	7.49166	7.49804	7.54805	7.24724	7.37219	7.51411	7.44753	7.37949
1.277	6.58285	6.75877	6.59407	6.36626	6.17487	6.21038	6.40886	6.72736	6.49747	6.6682	5.45308	3.13376	3.5288	2.60496	3.2313	5.62423	5.61771	5.99268	7.49692	7.2517	7.49129	7.49768	7.54769	7.24685	7.37179	7.51374	7.44717	7.37911
1.278	6.5826	6.75849	6.59385	6.36598	6.17453	6.21007	6.40861	6.72706	6.49717	6.66789	5.45433	3.13436	3.52956	2.6055	3.2325	5.62496	5.61802	5.99263	7.49655	7.25132	7.49093	7.49732	7.54733	7.24646	7.3714	7.51338	7.44682	7.37872
1.279	6.58235	6.75821	6.59362	6.3657	6.1742	6.20977	6.40836	6.72676	6.49687	6.66757	5.45558	3.13497	3.53031	2.60604	3.23371	5.62568	5.61832	5.99258	7.49618	7.25093	7.49056	7.49696	7.54697	7.24607	7.371	7.51302	7.44646	7.37833
1.28	6.5821	6.75793	6.5934	6.36541	6.17386	6.20947	6.40811	6.72645	6.49658	6.66726	5.45682	3.13557	3.53106	2.60658	3.23491	5.6264	5.61862	5.99253	7.49581	7.25055	7.49019	7.4966	7.5466	7.24568	7.3706	7.51265	7.4461	7.37794
1.281	6.58185	6.75765	6.59317	6.36513	6.17352	6.20916	6.40786	6.72615	6.49628	6.66694	5.45806	3.13617	3.53182	2.60712	3.23612	5.62711	5.61892	5.99248	7.49545	7.25016	7.48982	7.49624	7.54624	7.24528	7.3702	7.51229	7.44574	7.37755
1.282	6.5816	6.75737	6.59295	6.36485	6.17319	6.20886	6.40761	6.72584	6.49598	6.66662	5.45929	3.13678	3.53257	2.60766	3.23732	5.62782	5.61921	5.99243	7.49508	7.24978	7.48946	7.49588	7.54588	7.24489	7.3698	7.51192	7.44538	7.37716
1.283	6.58135	6.7571	6.59272	6.36456	6.17285	6.20855	6.40735	6.72554	6.49568	6.66631	5.46052	3.13738	3.53333	2.6082	3.23853	5.62853	5.6195	5.99238	7.49471	7.2494	7.48909	7.49552	7.54552	7.2445	7.3694	7.51156	7.44502	7.37677
1.284	6.58109	6.75682	6.59249	6.36428	6.17251	6.20824	6.4071	6.72523	6.49538	6.66599	5.46175	3.13798	3.53408	2.60874	3.23974	5.62923	5.61979	5.99232	7.49434	7.24901	7.48872	7.49516	7.54515	7.24411	7.369	7.51119	7.44466	7.37638
1.285	6.58084	6.75654	6.59227	6.36399	6.17217	6.20793	6.40685	6.72493	6.49508	6.66567	5.46297	3.13859	3.53483	2.60928	3.24094	5.62993	5.62008	5.99227	7.49397	7.24862	7.48835	7.4948	7.54479	7.24371	7.3686	7.51083	7.4443	7.37599
1.286	6.58059	6.75626	6.59204	6.36371	6.17183	6.20763	6.40659	6.72462	6.49478	6.66535	5.46419	3.13919	3.53559	2.60982	3.24215	5.63063	5.62037	5.99221	7.4936	7.24824	7.48798	7.49443	7.54443	7.24332	7.3682	7.51046	7.44394	7.3756
1.287	6.58034	6.75597	6.59181	6.36342	6.17149	6.20732	6.40634	6.72432	6.49448	6.66503	5.46541	3.13979	3.53634	2.61036	3.24335	5.63132	5.62065	5.99215	7.49324	7.24785	7.48761	7.49407	7.54406	7.24293	7.3678	7.51009	7.44358	7.37521
1.288	6.58008	6.75569	6.59158	6.36313	6.17114	6.20701	6.40608	6.72401	6.49418	6.66472	5.46662	3.1404	3.5371	2.61091	3.24456	5.632	5.62093	5.99209	7.49287	7.24747	7.48724	7.49371	7.5437	7.24253	7.3674	7.50973	7.44322	7.37482
1.289	6.57983	6.75541	6.59136	6.36285	6.1708	6.2067	6.40582	6.7237	6.49388	6.6644	5.46783	3.141	3.53785	2.61145	3.24576	5.63269	5.62121	5.99203	7.4925	7.24708	7.48687	7.49335	7.54334	7.24214	7.367	7.50936	7.44286	7.37443
1.29	6.57957	6.75513	6.59113	6.36256	6.17046	6.20639	6.40557	6.7234	6.49358	6.66408	5.46903	3.1416	3.5386	2.61199	3.24697	5.63337	5.62148	5.99197	7.49213	7.24669	7.4865	7.49298	7.54297	7.24174	7.3666	7.50899	7.4425	7.37404
1.291	6.57932	6.75485	6.5909	6.36227	6.17012	6.20608	6.40531	6.72309	6.49327	6.66376	5.47023	3.14221	3.53936	2.61253	3.24817	5.63405	5.62175	5.99191	7.49176	7.24631	7.48614	7.49262	7.54261	7.24135	7.36619	7.50863	7.44214	7.37365
1.292	6.57906	6.75457	6.59067	6.36198	6.16977	6.20576	6.40505	6.72278	6.49297	6.66344	5.47142	3.14281	3.54011	2.61307	3.24938	5.63472	5.62202	5.99184	7.49139	7.24592	7.48576	7.49226	7.54224	7.24096	7.36579	7.50826	7.44177	7.37326
1.293	6.57881	6.75428	6.59044	6.36169	6.16943	6.20545	6.40479	6.72247	6.49267	6.66311	5.47261	3.14341	3.54087	2.61361	3.25058	5.63539	5.62229	5.99178	7.49102	7.24553	7.48539	7.4919	7.54188	7.24056	7.36539	7.50789	7.44141	7.37287
1.294	6.57855	6.754	6.59021	6.3614	6.16908	6.20514	6.40453	6.72216	6.49236	6.66279	5.4738	3.14401	3.54162	2.61415	3.25179	5.63605	5.62256	5.99171	7.49065	7.24514	7.48502	7.49153	7.54152	7.24016	7.36499	7.50753	7.44105	7.37248
1.295	6.57829	6.75372	6.58998	6.36111	6.16874	6.20482	6.40427	6.72186	6.49206	6.66247	5.47498	3.14462	3.54237	2.61469	3.25299	5.63671	5.62282	5.99165	7.49027	7.24476	7.48465	7.49117	7.54115	7.23977	7.36459	7.50716	7.44069	7.37208
1.296	6.57804	6.75343	6.58974	6.36082	6.16839	6.20451	6.40401	6.72155	6.49175	6.66215	5.47616	3.14522	3.54313	2.61523	3.2542	5.63737	5.62308	5.99158	7.4899	7.24437	7.48428	7.4908	7.54079	7.23937	7.36418	7.50679	7.44033	7.37169
1.297	6.57778	6.75315	6.58951	6.36053	6.16804	6.20419	6.40375	6.72124	6.49145	6.66183	5.47734	3.14582	3.54388	2.61577	3.2554	5.63803	5.62334	5.99151	7.48953	7.24398	7.48391	7.49044	7.54042	7.23898	7.36378	7.50642	7.43996	7.3713
1.298	6.57752	6.75286	6.58928	6.36024	6.1677	6.20388	6.40349	6.72093	6.49114	6.6615	5.47851	3.14643	3.54463	2.61631	3.25661	5.63868	5.6236	5.99144	7.48916	7.24359	7.48354	7.49008	7.54005	7.23858	7.36338	7.50605	7.4396	7.37091
1.299	6.57726	6.75258	6.58905	6.35995	6.16735	6.20356	6.40323	6.72062	6.49084	6.66118	5.47968	3.14703	3.54539	2.61685	3.25781	5.63933	5.62385	5.99137	7.48879	7.2432	7.48317	7.48971	7.53969	7.23819	7.36297	7.50569	7.43924	7.37051
1.3	6.577	6.75229	6.58881	6.35965	6.167	6.20324	6.40297	6.7203	6.49053	6.66086	5.48084	3.14763	3.54614	2.61739	3.25902	5.63997	5.62411	5.99129	7.48842	7.24281	7.4828	7.48935	7.53932	7.23779	7.36257	7.50532	7.43887	7.37012
1.301	6.57674	6.75201	6.58858	6.35936	6.16665	6.20293	6.40271	6.71999	6.49022	6.66053	5.482	3.14824	3.54689	2.61793	3.26022	5.64061	5.62436	5.99122	7.48805	7.24242	7.48242	7.48898	7.53896	7.23739	7.36217	7.50495	7.43851	7.36973
1.302	6.57648	6.75172	6.58835	6.35907	6.1663	6.20261	6.40244	6.71968	6.48992	6.66021	5.48316	3.14884	3.54765	2.61848	3.26142	5.64125	5.6246	5.99115	7.48767	7.24203	7.48205	7.48862	7.53859	7.23699	7.36176	7.50458	7.43815	7.36933
1.303	6.57622	6.75144	6.58811	6.35877	6.16595	6.20229	6.40218	6.71937	6.48961	6.65989	5.48431	3.14944	3.5484	2.61902	3.26263	5.64188	5.62485	5.99107	7.4873	7.24165	7.48168	7.48825	7.53822	7.2366	7.36136	7.50421	7.43778	7.36894
1.304	6.57596	6.75115	6.58788	6.35848	6.1656	6.20197	6.40191	6.71906	6.4893	6.65956	5.48545	3.15005	3.54915	2.61956	3.26383	5.64251	5.62509	5.99099	7.48693	7.24126	7.48131	7.48789	7.53786	7.2362	7.36095	7.50384	7.43742	7.36854
1.305	6.5757	6.75086	6.58764	6.35818	6.16525	6.20165	6.40165	6.71875	6.48899	6.65924	5.4866	3.15065	3.54991	2.6201	3.26504	5.64313	5.62533	5.99091	7.48656	7.24086	7.48093	7.48752	7.53749	7.2358	7.36055	7.50347	7.43705	7.36815
1.306	6.57544	6.75058	6.58741	6.35789	6.1649	6.20133	6.40138	6.71843	6.48868	6.65891	5.48774	3.15125	3.55066	2.62064	3.26624	5.64376	5.62557	5.99084	7.48618	7.24047	7.48056	7.48716	7.53712	7.2354	7.36014	7.5031	7.43669	7.36776
1.307	6.57518	6.75029	6.58717	6.35759	6.16454	6.20101	6.40112	6.71812	6.48837	6.65858	5.48887	3.15185	3.55141	2.62118	3.26745	5.64437	5.62581	5.99076	7.48581	7.24008	7.48019	7.48679	7.53675	7.23501	7.35974	7.50273	7.43633	7.36736
1.308	6.57492	6.75	6.58694	6.35729	6.16419	6.20068	6.40085	6.71781	6.48806	6.65826	5.49001	3.15246	3.55217	2.62172	3.26865	5.64499	5.62604	5.99067	7.48544	7.23969	7.47981	7.48642	7.53639	7.23461	7.35933	7.50236	7.43596	7.36697
1.309	6.57466	6.74971	6.5867	6.357	6.16384	6.20036	6.40059	6.71749	6.48775	6.65793	5.49113	3.15306	3.55292	2.62226	3.26986	5.6456	5.62628	5.99059	7.48506	7.2393	7.47944	7.48606	7.53602	7.23421	7.35893	7.50199	7.4356	7.36657
1.31	6.5744	6.74943	6.58646	6.3567	6.16348	6.20004	6.40032	6.71718	6.48744	6.6576	5.49226	3.15366	3.55367	2.6228	3.27106	5.64621	5.62651	5.99051	7.48469	7.23891	7.47907	7.48569	7.53565	7.23381	7.35852	7.50162	7.43523	7.36618
1.311	6.57413	6.74914	6.58623	6.3564	6.16313	6.19971	6.40005	6.71686	6.48713	6.65728	5.49338	3.15427	3.55443	2.62334	3.27227	5.64681	5.62673	5.99043	7.48431	7.23852	7.47869	7.48532	7.53528	7.23341	7.35812	7.50125	7.43486	7.36578
1.312	6.57387	6.74885	6.58599	6.3561	6.16277	6.19939	6.39978	6.71655	6.48682	6.65695	5.49449	3.15487	3.55518	2.62388	3.27347	5.64742	5.62696	5.99034	7.48394	7.23813	7.47832	7.48496	7.53491	7.23301	7.35771	7.50088	7.4345	7.36538
1.313	6.57361	6.74856	6.58575	6.3558	6.16242	6.19906	6.39951	6.71623	6.4865	6.65662	5.49561	3.15547	3.55593	2.62442	3.27467	5.64801	5.62718	5.99025	7.48356	7.23774	7.47794	7.48459	7.53455	7.23261	7.3573	7.5005	7.43413	7.36499
1.314	6.57334	6.74827	6.58551	6.35551	6.16206	6.19874	6.39924	6.71592	6.48619	6.65629	5.49671	3.15607	3.55669	2.62496	3.27588	5.64861	5.6274	5.99017	7.48319	7.23734	7.47757	7.48422	7.53418	7.23221	7.3569	7.50013	7.43377	7.36459
1.315	6.57308	6.74798	6.58527	6.35521	6.1617	6.19841	6.39897	6.7156	6.48588	6.65596	5.49782	3.15668	3.55744	2.62551	3.27708	5.6492	5.62762	5.99008	7.48282	7.23695	7.47719	7.48385	7.53381	7.23181	7.35649	7.49976	7.4334	7.3642
1.316	6.57281	6.74769	6.58503	6.3549	6.16135	6.19808	6.3987	6.71529	6.48556	6.65563	5.49892	3.15728	3.55819	2.62605	3.27829	5.64979	5.62784	5.98999	7.48244	7.23656	7.47682	7.48349	7.53344	7.23141	7.35608	7.49939	7.43303	7.3638
1.317	6.57255	6.7474	6.58479	6.3546	6.16099	6.19776	6.39843	6.71497	6.48525	6.6553	5.50002	3.15788	3.55894	2.62659	3.27949	5.65037	5.62805	5.9899	7.48206	7.23616	7.47644	7.48312	7.53307	7.23101	7.35568	7.49902	7.43267	7.3634
1.318	6.57228	6.74711	6.58455	6.3543	6.16063	6.19743	6.39816	6.71465	6.48494	6.65497	5.50111	3.15849	3.5597	2.62713	3.2807	5.65095	5.62827	5.98981	7.48169	7.23577	7.47607	7.48275	7.5327	7.23061	7.35527	7.49864	7.4323	7.363
1.319	6.57202	6.74681	6.58431	6.354	6.16027	6.1971	6.39789	6.71434	6.48462	6.65464	5.5022	3.15909	3.56045	2.62767	3.2819	5.65153	5.62848	5.98972	7.48131	7.23538	7.47569	7.48238	7.53233	7.23021	7.35486	7.49827	7.43193	7.36261
1.32	6.57175	6.74652	6.58407	6.3537	6.15991	6.19677	6.39762	6.71402	6.48431	6.65431	5.50328	3.15969	3.5612	2.62821	3.2831	5.6521	5.62869	5.98962	7.48094	7.23498	7.47532	7.48201	7.53196	7.22981	7.35445	7.4979	7.43157	7.36221
1.321	6.57149	6.74623	6.58383	6.3534	6.15955	6.19644	6.39734	6.7137	6.48399	6.65398	5.50436	3.1603	3.56196	2.62875	3.28431	5.65267	5.62889	5.98953	7.48056	7.23459	7.47494	7.48164	7.53159	7.22941	7.35404	7.49753	7.4312	7.36181
1.322	6.57122	6.74594	6.58359	6.35309	6.15919	6.19611	6.39707	6.71338	6.48367	6.65365	5.50544	3.1609	3.56271	2.62929	3.28551	5.65324	5.6291	5.98943	7.48019	7.2342	7.47456	7.48127	7.53122	7.229	7.35364	7.49715	7.43083	7.36141
1.323	6.57095	6.74565	6.58335	6.35279	6.15883	6.19578	6.3968	6.71307	6.48336	6.65332	5.50651	3.1615	3.56346	2.62983	3.28672	5.6538	5.6293	5.98934	7.47981	7.2338	7.47419	7.4809	7.53085	7.2286	7.35323	7.49678	7.43046	7.36102
1.324	6.57068	6.74535	6.58311	6.35248	6.15847	6.19545	6.39652	6.71275	6.48304	6.65299	5.50758	3.1621	3.56421	2.63037	3.28792	5.65436	5.6295	5.98924	7.47943	7.23341	7.47381	7.48054	7.53048	7.2282	7.35282	7.49641	7.43009	7.36062
1.325	6.57042	6.74506	6.58287	6.35218	6.1581	6.19511	6.39625	6.71243	6.48272	6.65265	5.50865	3.16271	3.56497	2.63091	3.28912	5.65492	5.6297	5.98914	7.47905	7.23301	7.47343	7.48017	7.53011	7.2278	7.35241	7.49603	7.42973	7.36022
1.326	6.57015	6.74477	6.58262	6.35187	6.15774	6.19478	6.39597	6.71211	6.48241	6.65232	5.50971	3.16331	3.56572	2.63145	3.29033	5.65547	5.62989	5.98904	7.47868	7.23262	7.47306	7.4798	7.52973	7.22739	7.352	7.49566	7.42936	7.35982
1.327	6.56988	6.74447	6.58238	6.35157	6.15738	6.19445	6.3957	6.71179	6.48209	6.65199	5.51077	3.16391	3.56647	2.63199	3.29153	5.65602	5.63009	5.98894	7.4783	7.23222	7.47268	7.47943	7.52936	7.22699	7.35159	7.49528	7.42899	7.35942
1.328	6.56961	6.74418	6.58214	6.35126	6.15701	6.19411	6.39542	6.71147	6.48177	6.65165	5.51182	3.16451	3.56722	2.63253	3.29274	5.65657	5.63028	5.98884	7.47792	7.23183	7.4723	7.47906	7.52899	7.22659	7.35118	7.49491	7.42862	7.35902
1.329	6.56934	6.74388	6.58189	6.35096	6.15665	6.19378	6.39515	6.71115	6.48145	6.65132	5.51287	3.16512	3.56798	2.63307	3.29394	5.65711	5.63047	5.98874	7.47755	7.23143	7.47192	7.47868	7.52862	7.22619	7.35077	7.49454	7.42825	7.35862
1.33	6.56907	6.74359	6.58165	6.35065	6.15628	6.19344	6.39487	6.71083	6.48113	6.65099	5.51392	3.16572	3.56873	2.63362	3.29514	5.65766	5.63066	5.98864	7.47717	7.23104	7.47155	7.47831	7.52825	7.22578	7.35036	7.49416	7.42788	7.35822
1.331	6.5688	6.74329	6.5814	6.35034	6.15592	6.19311	6.39459	6.71051	6.48081	6.65065	5.51496	3.16632	3.56948	2.63416	3.29635	5.65819	5.63084	5.98853	7.47679	7.23064	7.47117	7.47794	7.52788	7.22538	7.34995	7.49379	7.42751	7.35782
1.332	6.56853	6.743	6.58116	6.35003	6.15555	6.19277	6.39431	6.71019	6.48049	6.65032	5.516	3.16693	3.57023	2.6347	3.29755	5.65873	5.63103	5.98843	7.47641	7.23024	7.47079	7.47757	7.5275	7.22497	7.34954	7.49341	7.42714	7.35742
1.333	6.56826	6.7427	6.58091	6.34973	6.15519	6.19243	6.39403	6.70986	6.48017	6.64998	5.51703	3.16753	3.57099	2.63524	3.29875	5.65926	5.63121	5.98832	7.47603	7.22985	7.47041	7.4772	7.52713	7.22457	7.34913	7.49304	7.42677	7.35702
1.334	6.56799	6.74241	6.58067	6.34942	6.15482	6.1921	6.39376	6.70954	6.47985	6.64965	5.51806	3.16813	3.57174	2.63578	3.29996	5.65978	5.63139	5.98821	7.47565	7.22945	7.47003	7.47683	7.52676	7.22417	7.34872	7.49266	7.4264	7.35662
1.335	6.56772	6.74211	6.58042	6.34911	6.15445	6.19176	6.39348	6.70922	6.47953	6.64931	5.51909	3.16873	3.57249	2.63632	3.30116	5.66031	5.63157	5.98811	7.47527	7.22905	7.46965	7.47646	7.52639	7.22376	7.34831	7.49228	7.42603	7.35622
1.336	6.56745	6.74181	6.58017	6.3488	6.15408	6.19142	6.3932	6.7089	6.47921	6.64897	5.52011	3.16934	3.57324	2.63686	3.30236	5.66083	5.63174	5.988	7.4749	7.22866	7.46927	7.47609	7.52601	7.22336	7.34789	7.49191	7.42566	7.35582
1.337	6.56718	6.74152	6.57993	6.34849	6.15371	6.19108	6.39292	6.70857	6.47888	6.64864	5.52113	3.16994	3.574	2.6374	3.30357	5.66135	5.63192	5.98789	7.47452	7.22826	7.4689	7.47571	7.52564	7.22295	7.34748	7.49153	7.42529	7.35542
1.338	6.5669	6.74122	6.57968	6.34818	6.15334	6.19074	6.39263	6.70825	6.47856	6.6483	5.52214	3.17054	3.57475	2.63794	3.30477	5.66186	5.63209	5.98778	7.47414	7.22786	7.46852	7.47534	7.52527	7.22255	7.34707	7.49116	7.42492	7.35502
1.339	6.56663	6.74092	6.57943	6.34787	6.15297	6.1904	6.39235	6.70793	6.47824	6.64796	5.52316	3.17114	3.5755	2.63848	3.30598	5.66237	5.63226	5.98766	7.47376	7.22746	7.46814	7.47497	7.52489	7.22214	7.34666	7.49078	7.42455	7.35462
1.34	6.56636	6.74062	6.57919	6.34756	6.1526	6.19006	6.39207	6.7076	6.47791	6.64763	5.52416	3.17175	3.57625	2.63902	3.30718	5.66288	5.63243	5.98755	7.47338	7.22707	7.46776	7.4746	7.52452	7.22174	7.34625	7.4904	7.42418	7.35421
1.341	6.56608	6.74032	6.57894	6.34724	6.15223	6.18972	6.39179	6.70728	6.47759	6.64729	5.52517	3.17235	3.577	2.63956	3.30838	5.66339	5.63259	5.98744	7.473	7.22667	7.46738	7.47422	7.52414	7.22133	7.34583	7.49003	7.42381	7.35381
1.342	6.56581	6.74003	6.57869	6.34693	6.15186	6.18937	6.39151	6.70696	6.47727	6.64695	5.52617	3.17295	3.57776	2.6401	3.30959	5.66389	5.63276	5.98732	7.47262	7.22627	7.467	7.47385	7.52377	7.22092	7.34542	7.48965	7.42343	7.35341
1.343	6.56554	6.73973	6.57844	6.34662	6.15149	6.18903	6.39122	6.70663	6.47694	6.64661	5.52716	3.17356	3.57851	2.64064	3.31079	5.66439	5.63292	5.98721	7.47224	7.22587	7.46662	7.47348	7.5234	7.22052	7.34501	7.48927	7.42306	7.35301
1.344	6.56526	6.73943	6.57819	6.34631	6.15112	6.18869	6.39094	6.70631	6.47662	6.64627	5.52815	3.17416	3.57926	2.64118	3.31199	5.66488	5.63308	5.98709	7.47186	7.22547	7.46624	7.4731	7.52302	7.22011	7.3446	7.48889	7.42269	7.35261
1.345	6.56499	6.73913	6.57794	6.34599	6.15075	6.18834	6.39066	6.70598	6.47629	6.64593	5.52914	3.17476	3.58001	2.64173	3.3132	5.66538	5.63324	5.98698	7.47148	7.22507	7.46585	7.47273	7.52265	7.2197	7.34418	7.48852	7.42232	7.3522
1.346	6.56471	6.73883	6.57769	6.34568	6.15037	6.188	6.39037	6.70566	6.47597	6.64559	5.53013	3.17536	3.58076	2.64227	3.3144	5.66587	5.63339	5.98686	7.47109	7.22467	7.46547	7.47236	7.52227	7.2193	7.34377	7.48814	7.42194	7.3518
1.347	6.56444	6.73853	6.57744	6.34536	6.15	6.18765	6.39009	6.70533	6.47564	6.64525	5.53111	3.17597	3.58152	2.64281	3.3156	5.66635	5.63355	5.98674	7.47071	7.22427	7.46509	7.47198	7.5219	7.21889	7.34336	7.48776	7.42157	7.3514
1.348	6.56416	6.73823	6.57719	6.34505	6.14962	6.18731	6.3898	6.705	6.47531	6.64491	5.53208	3.17657	3.58227	2.64335	3.3168	5.66683	5.6337	5.98662	7.47033	7.22388	7.46471	7.47161	7.52152	7.21848	7.34294	7.48738	7.4212	7.35099
1.349	6.56389	6.73793	6.57694	6.34473	6.14925	6.18696	6.38951	6.70468	6.47499	6.64457	5.53306	3.17717	3.58302	2.64389	3.31801	5.66731	5.63385	5.9865	7.46995	7.22348	7.46433	7.47124	7.52115	7.21808	7.34253	7.487	7.42083	7.35059
1.35	6.56361	6.73763	6.57669	6.34442	6.14887	6.18662	6.38923	6.70435	6.47466	6.64423	5.53403	3.17777	3.58377	2.64443	3.31921	5.66779	5.634	5.98638	7.46957	7.22308	7.46395	7.47086	7.52077	7.21767	7.34211	7.48663	7.42045	7.35019
1.351	6.56333	6.73733	6.57644	6.3441	6.1485	6.18627	6.38894	6.70402	6.47433	6.64389	5.53499	3.17838	3.58452	2.64497	3.32041	5.66827	5.63415	5.98625	7.46919	7.22268	7.46357	7.47049	7.52039	7.21726	7.3417	7.48625	7.42008	7.34978
1.352	6.56306	6.73702	6.57618	6.34379	6.14812	6.18592	6.38865	6.7037	6.474	6.64355	5.53595	3.17898	3.58527	2.64551	3.32162	5.66874	5.63429	5.98613	7.4688	7.22227	7.46318	7.47011	7.52002	7.21685	7.34128	7.48587	7.41971	7.34938
1.353	6.56278	6.73672	6.57593	6.34347	6.14775	6.18557	6.38837	6.70337	6.47367	6.64321	5.53691	3.17958	3.58603	2.64605	3.32282	5.6692	5.63444	5.986	7.46842	7.22187	7.4628	7.46974	7.51964	7.21644	7.34087	7.48549	7.41933	7.34897
1.354	6.5625	6.73642	6.57568	6.34315	6.14737	6.18522	6.38808	6.70304	6.47335	6.64287	5.53786	3.18018	3.58678	2.64659	3.32402	5.66967	5.63458	5.98588	7.46804	7.22147	7.46242	7.46936	7.51927	7.21604	7.34045	7.48511	7.41896	7.34857
1.355	6.56222	6.73612	6.57543	6.34283	6.14699	6.18487	6.38779	6.70271	6.47302	6.64252	5.53882	3.18079	3.58753	2.64713	3.32523	5.67013	5.63472	5.98575	7.46766	7.22107	7.46204	7.46899	7.51889	7.21563	7.34004	7.48473	7.41858	7.34816
1.356	6.56194	6.73582	6.57517	6.34252	6.14661	6.18452	6.3875	6.70238	6.47269	6.64218	5.53976	3.18139	3.58828	2.64767	3.32643	5.67059	5.63486	5.98563	7.46727	7.22067	7.46165	7.46861	7.51851	7.21522	7.33962	7.48435	7.41821	7.34776
1.357	6.56167	6.73551	6.57492	6.3422	6.14623	6.18417	6.38721	6.70205	6.47236	6.64184	5.5407	3.18199	3.58903	2.64821	3.32763	5.67105	5.63499	5.9855	7.46689	7.22027	7.46127	7.46823	7.51813	7.21481	7.33921	7.48397	7.41784	7.34735
1.358	6.56139	6.73521	6.57467	6.34188	6.14585	6.18382	6.38692	6.70173	6.47203	6.6415	5.54164	3.18259	3.58978	2.64875	3.32883	5.6715	5.63513	5.98537	7.46651	7.21987	7.46089	7.46786	7.51776	7.2144	7.33879	7.48359	7.41746	7.34695
1.359	6.56111	6.73491	6.57441	6.34156	6.14547	6.18347	6.38663	6.7014	6.4717	6.64115	5.54258	3.1832	3.59053	2.64929	3.33004	5.67195	5.63526	5.98524	7.46613	7.21947	7.4605	7.46748	7.51738	7.21399	7.33838	7.48321	7.41709	7.34654
1.36	6.56083	6.7346	6.57416	6.34124	6.14509	6.18312	6.38634	6.70107	6.47136	6.64081	5.54351	3.1838	3.59129	2.64983	3.33124	5.6724	5.63539	5.98511	7.46574	7.21906	7.46012	7.46711	7.517	7.21358	7.33796	7.48283	7.41671	7.34614
1.361	6.56055	6.7343	6.5739	6.34092	6.14471	6.18277	6.38605	6.70074	6.47103	6.64046	5.54444	3.1844	3.59204	2.65038	3.33244	5.67284	5.63552	5.98498	7.46536	7.21866	7.45974	7.46673	7.51663	7.21317	7.33754	7.48245	7.41634	7.34573
1.362	6.56027	6.73399	6.57365	6.3406	6.14433	6.18241	6.38576	6.70041	6.4707	6.64012	5.54536	3.185	3.59279	2.65092	3.33364	5.67328	5.63565	5.98485	7.46497	7.21826	7.45935	7.46635	7.51625	7.21276	7.33713	7.48207	7.41596	7.34533
1.363	6.55999	6.73369	6.57339	6.34028	6.14395	6.18206	6.38547	6.70007	6.47037	6.63977	5.54628	3.1856	3.59354	2.65146	3.33485	5.67372	5.63577	5.98471	7.46459	7.21786	7.45897	7.46598	7.51587	7.21235	7.33671	7.48169	7.41558	7.34492
1.364	6.55971	6.73338	6.57313	6.33995	6.14357	6.18171	6.38517	6.69974	6.47004	6.63943	5.5472	3.18621	3.59429	2.652	3.33605	5.67415	5.6359	5.98458	7.46421	7.21745	7.45858	7.4656	7.51549	7.21194	7.33629	7.48131	7.41521	7.34451
1.365	6.55942	6.73308	6.57288	6.33963	6.14319	6.18135	6.38488	6.69941	6.4697	6.63908	5.54811	3.18681	3.59504	2.65254	3.33725	5.67459	5.63602	5.98444	7.46382	7.21705	7.4582	7.46522	7.51511	7.21153	7.33588	7.48093	7.41483	7.34411
1.366	6.55914	6.73277	6.57262	6.33931	6.1428	6.181	6.38459	6.69908	6.46937	6.63874	5.54902	3.18741	3.59579	2.65308	3.33845	5.67502	5.63614	5.98431	7.46344	7.21665	7.45782	7.46485	7.51473	7.21112	7.33546	7.48055	7.41446	7.3437
1.367	6.55886	6.73247	6.57236	6.33899	6.14242	6.18064	6.38429	6.69875	6.46904	6.63839	5.54993	3.18801	3.59654	2.65362	3.33966	5.67544	5.63626	5.98417	7.46305	7.21624	7.45743	7.46447	7.51436	7.21071	7.33504	7.48016	7.41408	7.34329
1.368	6.55858	6.73216	6.57211	6.33866	6.14203	6.18028	6.384	6.69842	6.4687	6.63804	5.55083	3.18862	3.5973	2.65416	3.34086	5.67587	5.63637	5.98403	7.46267	7.21584	7.45705	7.46409	7.51398	7.21029	7.33462	7.47978	7.4137	7.34288
1.369	6.5583	6.73185	6.57185	6.33834	6.14165	6.17993	6.3837	6.69808	6.46837	6.6377	5.55173	3.18922	3.59805	2.6547	3.34206	5.67629	5.63649	5.9839	7.46228	7.21544	7.45666	7.46371	7.5136	7.20988	7.3342	7.4794	7.41333	7.34248
1.37	6.55801	6.73155	6.57159	6.33802	6.14126	6.17957	6.38341	6.69775	6.46803	6.63735	5.55262	3.18982	3.5988	2.65524	3.34326	5.6767	5.6366	5.98376	7.4619	7.21503	7.45628	7.46333	7.51322	7.20947	7.33379	7.47902	7.41295	7.34207
1.371	6.55773	6.73124	6.57133	6.33769	6.14088	6.17921	6.38311	6.69742	6.4677	6.637	5.55351	3.19042	3.59955	2.65578	3.34447	5.67712	5.63671	5.98362	7.46151	7.21463	7.45589	7.46296	7.51284	7.20906	7.33337	7.47864	7.41257	7.34166
1.372	6.55745	6.73093	6.57107	6.33737	6.14049	6.17885	6.38282	6.69709	6.46736	6.63666	5.5544	3.19103	3.6003	2.65632	3.34567	5.67753	5.63682	5.98348	7.46112	7.21422	7.4555	7.46258	7.51246	7.20865	7.33295	7.47825	7.4122	7.34125
1.373	6.55716	6.73063	6.57082	6.33704	6.14011	6.17849	6.38252	6.69675	6.46702	6.63631	5.55528	3.19163	3.60105	2.65686	3.34687	5.67794	5.63693	5.98333	7.46074	7.21382	7.45512	7.4622	7.51208	7.20823	7.33253	7.47787	7.41182	7.34085
1.374	6.55688	6.73032	6.57056	6.33672	6.13972	6.17814	6.38222	6.69642	6.46669	6.63596	5.55616	3.19223	3.6018	2.6574	3.34807	5.67835	5.63704	5.98319	7.46035	7.21341	7.45473	7.46182	7.5117	7.20782	7.33211	7.47749	7.41144	7.34044
1.375	6.5566	6.73001	6.5703	6.33639	6.13933	6.17778	6.38193	6.69608	6.46635	6.63561	5.55704	3.19283	3.60255	2.65794	3.34927	5.67875	5.63714	5.98305	7.45997	7.21301	7.45435	7.46144	7.51132	7.20741	7.33169	7.4771	7.41106	7.34003
1.376	6.55631	6.7297	6.57004	6.33606	6.13894	6.17742	6.38163	6.69575	6.46601	6.63526	5.55791	3.19343	3.6033	2.65848	3.35048	5.67915	5.63724	5.9829	7.45958	7.2126	7.45396	7.46106	7.51094	7.207	7.33127	7.47672	7.41069	7.33962
1.377	6.55603	6.72939	6.56978	6.33574	6.13856	6.17705	6.38133	6.69542	6.46568	6.63491	5.55878	3.19404	3.60405	2.65902	3.35168	5.67955	5.63734	5.98276	7.45919	7.2122	7.45357	7.46068	7.51056	7.20658	7.33085	7.47634	7.41031	7.33921
1.378	6.55574	6.72908	6.56952	6.33541	6.13817	6.17669	6.38103	6.69508	6.46534	6.63456	5.55964	3.19464	3.6048	2.65957	3.35288	5.67995	5.63744	5.98261	7.45881	7.21179	7.45319	7.4603	7.51018	7.20617	7.33043	7.47595	7.40993	7.3388
1.379	6.55545	6.72878	6.56926	6.33508	6.13778	6.17633	6.38073	6.69475	6.465	6.63421	5.5605	3.19524	3.60555	2.66011	3.35408	5.68034	5.63754	5.98247	7.45842	7.21139	7.4528	7.45992	7.5098	7.20576	7.33001	7.47557	7.40955	7.33839
1.38	6.55517	6.72847	6.56899	6.33475	6.13739	6.17597	6.38043	6.69441	6.46466	6.63386	5.56136	3.19584	3.6063	2.66065	3.35528	5.68073	5.63764	5.98232	7.45803	7.21098	7.45241	7.45954	7.50942	7.20534	7.32959	7.47519	7.40917	7.33798
1.381	6.55488	6.72816	6.56873	6.33443	6.137	6.17561	6.38014	6.69407	6.46432	6.63351	5.56221	3.19645	3.60706	2.66119	3.35649	5.68111	5.63773	5.98217	7.45765	7.21057	7.45203	7.45916	7.50904	7.20493	7.32917	7.4748	7.40879	7.33757
1.382	6.5546	6.72785	6.56847	6.3341	6.13661	6.17524	6.37984	6.69374	6.46398	6.63316	5.56306	3.19705	3.60781	2.66173	3.35769	5.6815	5.63782	5.98202	7.45726	7.21017	7.45164	7.45878	7.50865	7.20451	7.32875	7.47442	7.40841	7.33716
1.383	6.55431	6.72754	6.56821	6.33377	6.13622	6.17488	6.37953	6.6934	6.46364	6.63281	5.56391	3.19765	3.60856	2.66227	3.35889	5.68188	5.63792	5.98187	7.45687	7.20976	7.45125	7.4584	7.50827	7.2041	7.32833	7.47403	7.40804	7.33675
1.384	6.55402	6.72723	6.56795	6.33344	6.13583	6.17451	6.37923	6.69306	6.4633	6.63246	5.56475	3.19825	3.60931	2.66281	3.36009	5.68226	5.63801	5.98172	7.45648	7.20935	7.45086	7.45802	7.50789	7.20369	7.32791	7.47365	7.40766	7.33634
1.385	6.55373	6.72691	6.56768	6.33311	6.13543	6.17415	6.37893	6.69273	6.46296	6.63211	5.56559	3.19885	3.61006	2.66335	3.36129	5.68264	5.63809	5.98157	7.45609	7.20895	7.45047	7.45764	7.50751	7.20327	7.32749	7.47327	7.40728	7.33593
1.386	6.55345	6.7266	6.56742	6.33278	6.13504	6.17378	6.37863	6.69239	6.46262	6.63176	5.56643	3.19946	3.61081	2.66389	3.3625	5.68301	5.63818	5.98142	7.45571	7.20854	7.45009	7.45726	7.50713	7.20286	7.32707	7.47288	7.4069	7.33552
1.387	6.55316	6.72629	6.56716	6.33245	6.13465	6.17342	6.37833	6.69205	6.46228	6.6314	5.56726	3.20006	3.61156	2.66443	3.3637	5.68338	5.63826	5.98127	7.45532	7.20813	7.4497	7.45688	7.50675	7.20244	7.32665	7.4725	7.40652	7.33511
1.388	6.55287	6.72598	6.56689	6.33212	6.13425	6.17305	6.37803	6.69172	6.46194	6.63105	5.56809	3.20066	3.61231	2.66497	3.3649	5.68375	5.63835	5.98111	7.45493	7.20772	7.44931	7.4565	7.50636	7.20203	7.32623	7.47211	7.40614	7.3347
1.389	6.55258	6.72567	6.56663	6.33178	6.13386	6.17268	6.37772	6.69138	6.4616	6.6307	5.56892	3.20126	3.61306	2.66551	3.3661	5.68411	5.63843	5.98096	7.45454	7.20732	7.44892	7.45612	7.50598	7.20161	7.3258	7.47173	7.40576	7.33429
1.39	6.55229	6.72536	6.56637	6.33145	6.13347	6.17232	6.37742	6.69104	6.46126	6.63035	5.56974	3.20186	3.61381	2.66605	3.3673	5.68448	5.63851	5.9808	7.45415	7.20691	7.44853	7.45574	7.5056	7.20119	7.32538	7.47134	7.40538	7.33388
1.391	6.552	6.72504	6.5661	6.33112	6.13307	6.17195	6.37712	6.6907	6.46091	6.62999	5.57055	3.20247	3.61456	2.66659	3.3685	5.68484	5.63859	5.98065	7.45376	7.2065	7.44814	7.45536	7.50522	7.20078	7.32496	7.47095	7.405	7.33347
1.392	6.55171	6.72473	6.56584	6.33079	6.13268	6.17158	6.37681	6.69036	6.46057	6.62964	5.57137	3.20307	3.61531	2.66713	3.3697	5.68519	5.63866	5.98049	7.45337	7.20609	7.44775	7.45497	7.50483	7.20036	7.32454	7.47057	7.40462	7.33305
1.393	6.55142	6.72442	6.56557	6.33045	6.13228	6.17121	6.37651	6.69002	6.46023	6.62928	5.57218	3.20367	3.61606	2.66767	3.37091	5.68555	5.63874	5.98033	7.45298	7.20568	7.44736	7.45459	7.50445	7.19995	7.32411	7.47018	7.40423	7.33264
1.394	6.55113	6.7241	6.56531	6.33012	6.13189	6.17084	6.3762	6.68968	6.45989	6.62893	5.57299	3.20427	3.61681	2.66821	3.37211	5.6859	5.63881	5.98017	7.4526	7.20527	7.44698	7.45421	7.50407	7.19953	7.32369	7.4698	7.40385	7.33223
1.395	6.55084	6.72379	6.56504	6.32979	6.13149	6.17047	6.3759	6.68934	6.45954	6.62858	5.57379	3.20487	3.61756	2.66875	3.37331	5.68625	5.63888	5.98001	7.45221	7.20487	7.44659	7.45383	7.50368	7.19911	7.32327	7.46941	7.40347	7.33182
1.396	6.55055	6.72348	6.56477	6.32945	6.13109	6.1701	6.37559	6.689	6.4592	6.62822	5.57459	3.20548	3.61831	2.6693	3.37451	5.6866	5.63895	5.97985	7.45182	7.20446	7.4462	7.45344	7.5033	7.1987	7.32285	7.46902	7.40309	7.33141
1.397	6.55026	6.72316	6.56451	6.32912	6.13069	6.16973	6.37528	6.68866	6.45885	6.62787	5.57539	3.20608	3.61906	2.66984	3.37571	5.68694	5.63902	5.97969	7.45143	7.20405	7.44581	7.45306	7.50291	7.19828	7.32242	7.46864	7.40271	7.33099
1.398	6.54997	6.72285	6.56424	6.32878	6.1303	6.16936	6.37498	6.68832	6.45851	6.62751	5.57618	3.20668	3.61981	2.67038	3.37691	5.68728	5.63909	5.97953	7.45104	7.20364	7.44542	7.45268	7.50253	7.19786	7.322	7.46825	7.40233	7.33058
1.399	6.54968	6.72253	6.56397	6.32845	6.1299	6.16899	6.37467	6.68798	6.45816	6.62715	5.57697	3.20728	3.62056	2.67092	3.37811	5.68762	5.63915	5.97937	7.45065	7.20323	7.44503	7.4523	7.50215	7.19745	7.32158	7.46786	7.40195	7.33017
1.4	6.54939	6.72222	6.56371	6.32811	6.1295	6.16862	6.37436	6.68764	6.45782	6.6268	5.57776	3.20788	3.62131	2.67146	3.37931	5.68796	5.63922	5.97921	7.45025	7.20282	7.44463	7.45191	7.50176	7.19703	7.32115	7.46747	7.40156	7.32975
1.401	6.5491	6.7219	6.56344	6.32777	6.1291	6.16824	6.37406	6.6873	6.45747	6.62644	5.57854	3.20849	3.62206	2.672	3.38052	5.68829	5.63928	5.97904	7.44986	7.20241	7.44424	7.45153	7.50138	7.19661	7.32073	7.46709	7.40118	7.32934
1.402	6.5488	6.72159	6.56317	6.32744	6.1287	6.16787	6.37375	6.68696	6.45713	6.62609	5.57932	3.20909	3.62281	2.67254	3.38172	5.68862	5.63934	5.97888	7.44947	7.202	7.44385	7.45115	7.50099	7.19619	7.3203	7.4667	7.4008	7.32893
1.403	6.54851	6.72127	6.5629	6.3271	6.1283	6.1675	6.37344	6.68662	6.45678	6.62573	5.58009	3.20969	3.62356	2.67308	3.38292	5.68895	5.6394	5.97871	7.44908	7.20159	7.44346	7.45076	7.50061	7.19577	7.31988	7.46631	7.40042	7.32851
1.404	6.54822	6.72096	6.56264	6.32676	6.1279	6.16712	6.37313	6.68628	6.45643	6.62537	5.58087	3.21029	3.62431	2.67362	3.38412	5.68928	5.63946	5.97855	7.44869	7.20118	7.44307	7.45038	7.50022	7.19536	7.31945	7.46592	7.40003	7.3281
1.405	6.54792	6.72064	6.56237	6.32643	6.1275	6.16675	6.37282	6.68593	6.45608	6.62501	5.58163	3.21089	3.62506	2.67416	3.38532	5.6896	5.63952	5.97838	7.4483	7.20077	7.44268	7.44999	7.49984	7.19494	7.31903	7.46554	7.39965	7.32769
1.406	6.54763	6.72033	6.5621	6.32609	6.1271	6.16637	6.37251	6.68559	6.45574	6.62466	5.5824	3.2115	3.62581	2.6747	3.38652	5.68992	5.63957	5.97821	7.44791	7.20035	7.44229	7.44961	7.49945	7.19452	7.3186	7.46515	7.39927	7.32727
1.407	6.54734	6.72001	6.56183	6.32575	6.1267	6.166	6.3722	6.68525	6.45539	6.6243	5.58316	3.2121	3.62655	2.67524	3.38772	5.69024	5.63962	5.97804	7.44752	7.19994	7.4419	7.44923	7.49907	7.1941	7.31818	7.46476	7.39888	7.32686
1.408	6.54704	6.71969	6.56156	6.32541	6.12629	6.16562	6.37189	6.6849	6.45504	6.62394	5.58392	3.2127	3.6273	2.67578	3.38892	5.69056	5.63968	5.97787	7.44712	7.19953	7.4415	7.44884	7.49868	7.19368	7.31775	7.46437	7.3985	7.32644
1.409	6.54675	6.71938	6.56129	6.32507	6.12589	6.16524	6.37158	6.68456	6.45469	6.62358	5.58467	3.2133	3.62805	2.67632	3.39012	5.69087	5.63973	5.9777	7.44673	7.19912	7.44111	7.44846	7.4983	7.19326	7.31733	7.46398	7.39812	7.32603
1.41	6.54645	6.71906	6.56102	6.32473	6.12549	6.16487	6.37127	6.68422	6.45434	6.62322	5.58542	3.2139	3.6288	2.67686	3.39132	5.69118	5.63978	5.97753	7.44634	7.19871	7.44072	7.44807	7.49791	7.19284	7.3169	7.46359	7.39773	7.32561
1.411	6.54616	6.71874	6.56075	6.32439	6.12509	6.16449	6.37096	6.68387	6.45399	6.62286	5.58617	3.2145	3.62955	2.6774	3.39252	5.69149	5.63982	5.97736	7.44595	7.1983	7.44033	7.44769	7.49753	7.19242	7.31648	7.4632	7.39735	7.3252
1.412	6.54586	6.71842	6.56048	6.32405	6.12468	6.16411	6.37065	6.68353	6.45364	6.6225	5.58692	3.21511	3.6303	2.67794	3.39372	5.6918	5.63987	5.97719	7.44556	7.19789	7.43994	7.4473	7.49714	7.192	7.31605	7.46282	7.39697	7.32478
1.413	6.54557	6.7181	6.56021	6.32371	6.12428	6.16373	6.37033	6.68319	6.45329	6.62214	5.58766	3.21571	3.63105	2.67848	3.39492	5.6921	5.63991	5.97702	7.44516	7.19747	7.43954	7.44692	7.49675	7.19158	7.31563	7.46243	7.39658	7.32437
1.414	6.54527	6.71779	6.55994	6.32337	6.12387	6.16335	6.37002	6.68284	6.45294	6.62179	5.5884	3.21631	3.6318	2.67902	3.39612	5.69241	5.63996	5.97684	7.44477	7.19706	7.43915	7.44653	7.49637	7.19116	7.3152	7.46204	7.3962	7.32395
1.415	6.54498	6.71747	6.55966	6.32303	6.12347	6.16297	6.36971	6.6825	6.45259	6.62142	5.58913	3.21691	3.63255	2.67956	3.39733	5.6927	5.64	5.97667	7.44438	7.19665	7.43876	7.44615	7.49598	7.19074	7.31477	7.46165	7.39581	7.32354
1.416	6.54468	6.71715	6.55939	6.32269	6.12306	6.16259	6.36939	6.68215	6.45224	6.62106	5.58986	3.21751	3.6333	2.6801	3.39853	5.693	5.64004	5.97649	7.44398	7.19624	7.43836	7.44576	7.49559	7.19032	7.31435	7.46126	7.39543	7.32312
1.417	6.54438	6.71683	6.55912	6.32235	6.12266	6.16221	6.36908	6.68181	6.45189	6.6207	5.59059	3.21812	3.63405	2.68065	3.39973	5.6933	5.64008	5.97632	7.44359	7.19582	7.43797	7.44537	7.49521	7.1899	7.31392	7.46087	7.39504	7.3227
1.418	6.54409	6.71651	6.55885	6.322	6.12225	6.16183	6.36877	6.68146	6.45154	6.62034	5.59131	3.21872	3.6348	2.68119	3.40093	5.69359	5.64011	5.97614	7.4432	7.19541	7.43758	7.44499	7.49482	7.18948	7.31349	7.46048	7.39466	7.32229
1.419	6.54379	6.71619	6.55857	6.32166	6.12184	6.16145	6.36845	6.68111	6.45119	6.61998	5.59203	3.21932	3.63555	2.68173	3.40213	5.69388	5.64015	5.97597	7.4428	7.195	7.43718	7.4446	7.49443	7.18906	7.31306	7.46009	7.39427	7.32187
1.42	6.54349	6.71587	6.5583	6.32132	6.12144	6.16107	6.36814	6.68077	6.45084	6.61962	5.59275	3.21992	3.63629	2.68227	3.40333	5.69416	5.64018	5.97579	7.44241	7.19458	7.43679	7.44422	7.49404	7.18864	7.31264	7.4597	7.39389	7.32145
1.421	6.54319	6.71555	6.55803	6.32097	6.12103	6.16069	6.36782	6.68042	6.45048	6.61926	5.59346	3.22052	3.63704	2.68281	3.40453	5.69445	5.64022	5.97561	7.44202	7.19417	7.4364	7.44383	7.49366	7.18822	7.31221	7.45931	7.3935	7.32104
1.422	6.54289	6.71523	6.55775	6.32063	6.12062	6.16031	6.36751	6.68008	6.45013	6.6189	5.59417	3.22112	3.63779	2.68335	3.40573	5.69473	5.64025	5.97543	7.44162	7.19375	7.436	7.44344	7.49327	7.1878	7.31178	7.45892	7.39312	7.32062
1.423	6.5426	6.71491	6.55748	6.32029	6.12021	6.15992	6.36719	6.67973	6.44978	6.61853	5.59488	3.22173	3.63854	2.68389	3.40693	5.69501	5.64028	5.97525	7.44123	7.19334	7.43561	7.44306	7.49288	7.18737	7.31135	7.45852	7.39273	7.3202
1.424	6.5423	6.71459	6.55721	6.31994	6.1198	6.15954	6.36687	6.67938	6.44942	6.61817	5.59558	3.22233	3.63929	2.68443	3.40813	5.69529	5.64031	5.97507	7.44083	7.19293	7.43521	7.44267	7.49249	7.18695	7.31093	7.45813	7.39235	7.31979
1.425	6.542	6.71427	6.55693	6.3196	6.11939	6.15916	6.36656	6.67903	6.44907	6.61781	5.59628	3.22293	3.64004	2.68497	3.40933	5.69557	5.64033	5.97489	7.44044	7.19251	7.43482	7.44228	7.4921	7.18653	7.3105	7.45774	7.39196	7.31937
1.426	6.5417	6.71395	6.55666	6.31925	6.11898	6.15877	6.36624	6.67869	6.44872	6.61744	5.59698	3.22353	3.64079	2.68551	3.41053	5.69584	5.64036	5.97471	7.44004	7.1921	7.43442	7.44189	7.49172	7.18611	7.31007	7.45735	7.39157	7.31895
1.427	6.5414	6.71362	6.55638	6.31891	6.11857	6.15839	6.36592	6.67834	6.44836	6.61708	5.59767	3.22413	3.64154	2.68605	3.41173	5.69611	5.64039	5.97452	7.43965	7.19168	7.43403	7.44151	7.49133	7.18569	7.30964	7.45696	7.39119	7.31853
1.428	6.5411	6.7133	6.55611	6.31856	6.11816	6.158	6.3656	6.67799	6.44801	6.61672	5.59837	3.22473	3.64228	2.68659	3.41293	5.69638	5.64041	5.97434	7.43925	7.19127	7.43363	7.44112	7.49094	7.18526	7.30921	7.45657	7.3908	7.31811
1.429	6.5408	6.71298	6.55583	6.31821	6.11775	6.15762	6.36529	6.67764	6.44765	6.61635	5.59905	3.22533	3.64303	2.68713	3.41413	5.69664	5.64043	5.97416	7.43886	7.19085	7.43324	7.44073	7.49055	7.18484	7.30878	7.45618	7.39041	7.3177
1.43	6.5405	6.71266	6.55556	6.31787	6.11734	6.15723	6.36497	6.67729	6.4473	6.61599	5.59974	3.22594	3.64378	2.68767	3.41533	5.69691	5.64045	5.97397	7.43846	7.19044	7.43284	7.44034	7.49016	7.18442	7.30835	7.45578	7.39003	7.31728
1.431	6.5402	6.71234	6.55528	6.31752	6.11693	6.15684	6.36465	6.67694	6.44694	6.61562	5.60042	3.22654	3.64453	2.68821	3.41653	5.69717	5.64047	5.97379	7.43807	7.19002	7.43245	7.43996	7.48977	7.18399	7.30793	7.45539	7.38964	7.31686
1.432	6.5399	6.71201	6.555	6.31717	6.11652	6.15646	6.36433	6.67659	6.44658	6.61526	5.60109	3.22714	3.64528	2.68875	3.41773	5.69743	5.64049	5.9736	7.43767	7.18961	7.43205	7.43957	7.48938	7.18357	7.3075	7.455	7.38925	7.31644
1.433	6.5396	6.71169	6.55473	6.31683	6.1161	6.15607	6.36401	6.67625	6.44623	6.6149	5.60177	3.22774	3.64603	2.68929	3.41893	5.69768	5.6405	5.97341	7.43728	7.18919	7.43166	7.43918	7.48899	7.18315	7.30707	7.45461	7.38886	7.31602
1.434	6.5393	6.71137	6.55445	6.31648	6.11569	6.15568	6.36369	6.6759	6.44587	6.61453	5.60244	3.22834	3.64677	2.68983	3.42013	5.69794	5.64052	5.97323	7.43688	7.18878	7.43126	7.43879	7.4886	7.18272	7.30664	7.45421	7.38848	7.3156
1.435	6.53899	6.71104	6.55417	6.31613	6.11528	6.15529	6.36337	6.67555	6.44551	6.61416	5.60311	3.22894	3.64752	2.69037	3.42132	5.69819	5.64053	5.97304	7.43649	7.18836	7.43087	7.4384	7.48821	7.1823	7.30621	7.45382	7.38809	7.31518
1.436	6.53869	6.71072	6.55389	6.31578	6.11486	6.1549	6.36305	6.6752	6.44516	6.6138	5.60377	3.22955	3.64827	2.69091	3.42252	5.69844	5.64054	5.97285	7.43609	7.18794	7.43047	7.43801	7.48782	7.18188	7.30578	7.45343	7.3877	7.31477
1.437	6.53839	6.7104	6.55362	6.31543	6.11445	6.15451	6.36273	6.67485	6.4448	6.61343	5.60443	3.23015	3.64902	2.69145	3.42372	5.69869	5.64055	5.97266	7.43569	7.18753	7.43007	7.43762	7.48743	7.18145	7.30535	7.45304	7.38731	7.31435
1.438	6.53809	6.71007	6.55334	6.31508	6.11404	6.15412	6.3624	6.6745	6.44444	6.61307	5.60509	3.23075	3.64977	2.69199	3.42492	5.69894	5.64056	5.97247	7.4353	7.18711	7.42968	7.43724	7.48704	7.18103	7.30492	7.45264	7.38693	7.31393
1.439	6.53779	6.70975	6.55306	6.31473	6.11362	6.15373	6.36208	6.67414	6.44408	6.6127	5.60574	3.23135	3.65052	2.69253	3.42612	5.69918	5.64057	5.97228	7.4349	7.18669	7.42928	7.43685	7.48665	7.1806	7.30449	7.45225	7.38654	7.31351
1.44	6.53748	6.70942	6.55278	6.31438	6.11321	6.15334	6.36176	6.67379	6.44373	6.61233	5.60639	3.23195	3.65126	2.69307	3.42732	5.69942	5.64058	5.97209	7.4345	7.18628	7.42888	7.43646	7.48626	7.18018	7.30405	7.45186	7.38615	7.31309
1.441	6.53718	6.7091	6.5525	6.31403	6.11279	6.15295	6.36144	6.67344	6.44337	6.61197	5.60704	3.23255	3.65201	2.69361	3.42852	5.69966	5.64058	5.97189	7.43411	7.18586	7.42849	7.43607	7.48587	7.17975	7.30362	7.45146	7.38576	7.31267
1.442	6.53688	6.70877	6.55222	6.31368	6.11237	6.15256	6.36112	6.67309	6.44301	6.6116	5.60769	3.23315	3.65276	2.69416	3.42972	5.6999	5.64059	5.9717	7.43371	7.18544	7.42809	7.43568	7.48548	7.17933	7.30319	7.45107	7.38537	7.31225
1.443	6.53657	6.70845	6.55194	6.31333	6.11196	6.15217	6.36079	6.67274	6.44265	6.61123	5.60833	3.23376	3.65351	2.6947	3.43092	5.70013	5.64059	5.97151	7.43331	7.18502	7.42769	7.43529	7.48509	7.1789	7.30276	7.45067	7.38498	7.31183
1.444	6.53627	6.70812	6.55167	6.31298	6.11154	6.15178	6.36047	6.67239	6.44229	6.61086	5.60897	3.23436	3.65426	2.69524	3.43212	5.70036	5.64059	5.97131	7.43291	7.18461	7.42729	7.4349	7.4847	7.17848	7.30233	7.45028	7.38459	7.3114
1.445	6.53596	6.7078	6.55139	6.31263	6.11112	6.15139	6.36014	6.67203	6.44193	6.61049	5.6096	3.23496	3.655	2.69578	3.43332	5.70059	5.64059	5.97112	7.43252	7.18419	7.4269	7.43451	7.48431	7.17805	7.3019	7.44989	7.3842	7.31098
1.446	6.53566	6.70747	6.55111	6.31227	6.11071	6.15099	6.35982	6.67168	6.44157	6.61013	5.61023	3.23556	3.65575	2.69632	3.43452	5.70082	5.64059	5.97092	7.43212	7.18377	7.4265	7.43412	7.48392	7.17763	7.30147	7.44949	7.38382	7.31056
1.447	6.53536	6.70714	6.55082	6.31192	6.11029	6.1506	6.3595	6.67133	6.44121	6.60976	5.61086	3.23616	3.6565	2.69686	3.43572	5.70105	5.64059	5.97073	7.43172	7.18335	7.4261	7.43373	7.48353	7.1772	7.30103	7.4491	7.38343	7.31014
1.448	6.53505	6.70682	6.55054	6.31157	6.10987	6.1502	6.35917	6.67098	6.44085	6.60939	5.61149	3.23676	3.65725	2.6974	3.43691	5.70127	5.64059	5.97053	7.43132	7.18293	7.4257	7.43334	7.48313	7.17678	7.3006	7.4487	7.38304	7.30972
1.449	6.53475	6.70649	6.55026	6.31122	6.10945	6.14981	6.35885	6.67062	6.44049	6.60902	5.61211	3.23736	3.65799	2.69794	3.43811	5.70149	5.64058	5.97033	7.43092	7.18252	7.4253	7.43294	7.48274	7.17635	7.30017	7.44831	7.38265	7.3093
1.45	6.53444	6.70616	6.54998	6.31086	6.10903	6.14942	6.35852	6.67027	6.44012	6.60865	5.61273	3.23796	3.65874	2.69848	3.43931	5.70171	5.64057	5.97013	7.43053	7.1821	7.42491	7.43255	7.48235	7.17592	7.29974	7.44791	7.38226	7.30888
1.451	6.53413	6.70584	6.5497	6.31051	6.10861	6.14902	6.35819	6.66992	6.43976	6.60828	5.61334	3.23857	3.65949	2.69902	3.44051	5.70193	5.64057	5.96994	7.43013	7.18168	7.42451	7.43216	7.48196	7.1755	7.29931	7.44752	7.38187	7.30846
1.452	6.53383	6.70551	6.54942	6.31016	6.10819	6.14862	6.35787	6.66956	6.4394	6.60791	5.61396	3.23917	3.66024	2.69956	3.44171	5.70215	5.64056	5.96974	7.42973	7.18126	7.42411	7.43177	7.48157	7.17507	7.29887	7.44712	7.38148	7.30803
1.453	6.53352	6.70518	6.54914	6.3098	6.10777	6.14823	6.35754	6.66921	6.43904	6.60754	5.61457	3.23977	3.66098	2.7001	3.44291	5.70236	5.64055	5.96954	7.42933	7.18084	7.42371	7.43138	7.48117	7.17464	7.29844	7.44673	7.38109	7.30761
1.454	6.53322	6.70485	6.54885	6.30945	6.10735	6.14783	6.35721	6.66885	6.43867	6.60717	5.61517	3.24037	3.66173	2.70064	3.44411	5.70257	5.64054	5.96934	7.42893	7.18042	7.42331	7.43099	7.48078	7.17422	7.29801	7.44633	7.3807	7.30719
1.455	6.53291	6.70452	6.54857	6.30909	6.10693	6.14744	6.35689	6.6685	6.43831	6.6068	5.61578	3.24097	3.66248	2.70118	3.44531	5.70278	5.64052	5.96913	7.42853	7.18	7.42291	7.4306	7.48039	7.17379	7.29757	7.44594	7.3803	7.30677
1.456	6.5326	6.7042	6.54829	6.30874	6.10651	6.14704	6.35656	6.66814	6.43795	6.60643	5.61638	3.24157	3.66323	2.70172	3.4465	5.70299	5.64051	5.96893	7.42813	7.17958	7.42251	7.43021	7.48	7.17336	7.29714	7.44554	7.37991	7.30635
1.457	6.53229	6.70387	6.54801	6.30838	6.10609	6.14664	6.35623	6.66779	6.43758	6.60606	5.61697	3.24217	3.66397	2.70226	3.4477	5.70319	5.6405	5.96873	7.42773	7.17916	7.42211	7.42981	7.4796	7.17293	7.29671	7.44514	7.37952	7.30592
1.458	6.53199	6.70354	6.54772	6.30802	6.10566	6.14624	6.3559	6.66743	6.43722	6.60569	5.61757	3.24277	3.66472	2.7028	3.4489	5.7034	5.64048	5.96853	7.42733	7.17874	7.42171	7.42942	7.47921	7.17251	7.29627	7.44475	7.37913	7.3055
1.459	6.53168	6.70321	6.54744	6.30767	6.10524	6.14584	6.35557	6.66708	6.43686	6.60531	5.61816	3.24338	3.66547	2.70334	3.4501	5.7036	5.64046	5.96832	7.42693	7.17832	7.42131	7.42903	7.47882	7.17208	7.29584	7.44435	7.37874	7.30508
1.46	6.53137	6.70288	6.54716	6.30731	6.10482	6.14545	6.35524	6.66672	6.43649	6.60494	5.61875	3.24398	3.66622	2.70388	3.4513	5.7038	5.64044	5.96812	7.42653	7.1779	7.42091	7.42864	7.47842	7.17165	7.29541	7.44396	7.37835	7.30465
1.461	6.53106	6.70255	6.54687	6.30695	6.10439	6.14505	6.35491	6.66637	6.43613	6.60457	5.61933	3.24458	3.66696	2.70442	3.4525	5.70399	5.64042	5.96791	7.42613	7.17748	7.42051	7.42824	7.47803	7.17122	7.29497	7.44356	7.37796	7.30423
1.462	6.53075	6.70222	6.54659	6.3066	6.10397	6.14465	6.35458	6.66601	6.43576	6.6042	5.61991	3.24518	3.66771	2.70496	3.45369	5.70419	5.6404	5.96771	7.42573	7.17706	7.42011	7.42785	7.47764	7.17079	7.29454	7.44316	7.37757	7.30381
1.463	6.53045	6.70189	6.5463	6.30624	6.10355	6.14425	6.35425	6.66565	6.4354	6.60382	5.62049	3.24578	3.66846	2.7055	3.45489	5.70438	5.64038	5.9675	7.42533	7.17664	7.41971	7.42746	7.47724	7.17037	7.2941	7.44276	7.37717	7.30338
1.464	6.53014	6.70156	6.54602	6.30588	6.10312	6.14385	6.35392	6.6653	6.43503	6.60345	5.62107	3.24638	3.6692	2.70604	3.45609	5.70457	5.64036	5.96729	7.42493	7.17622	7.41931	7.42707	7.47685	7.16994	7.29367	7.44237	7.37678	7.30296
1.465	6.52983	6.70123	6.54573	6.30552	6.1027	6.14344	6.35359	6.66494	6.43467	6.60308	5.62164	3.24698	3.66995	2.70658	3.45729	5.70476	5.64033	5.96709	7.42453	7.1758	7.41891	7.42667	7.47646	7.16951	7.29323	7.44197	7.37639	7.30254
1.466	6.52952	6.7009	6.54545	6.30516	6.10227	6.14304	6.35326	6.66458	6.4343	6.60271	5.62221	3.24758	3.6707	2.70712	3.45849	5.70495	5.6403	5.96688	7.42413	7.17538	7.41851	7.42628	7.47606	7.16908	7.2928	7.44157	7.376	7.30211
1.467	6.52921	6.70057	6.54516	6.30481	6.10185	6.14264	6.35293	6.66423	6.43393	6.60233	5.62278	3.24818	3.67144	2.70766	3.45968	5.70513	5.64028	5.96667	7.42373	7.17496	7.41811	7.42589	7.47567	7.16865	7.29236	7.44118	7.37561	7.30169
1.468	6.5289	6.70024	6.54488	6.30445	6.10142	6.14224	6.3526	6.66387	6.43357	6.60196	5.62334	3.24878	3.67219	2.7082	3.46088	5.70531	5.64025	5.96646	7.42333	7.17453	7.41771	7.42549	7.47527	7.16822	7.29193	7.44078	7.37521	7.30126
1.469	6.52859	6.69991	6.54459	6.30409	6.10099	6.14184	6.35227	6.66351	6.4332	6.60158	5.6239	3.24939	3.67294	2.70874	3.46208	5.70549	5.64022	5.96625	7.42293	7.17411	7.41731	7.4251	7.47488	7.16779	7.29149	7.44038	7.37482	7.30084
1.47	6.52828	6.69957	6.5443	6.30373	6.10057	6.14143	6.35193	6.66315	6.43283	6.60121	5.62446	3.24999	3.67368	2.70928	3.46328	5.70567	5.64019	5.96604	7.42253	7.17369	7.41691	7.42471	7.47448	7.16736	7.29106	7.43998	7.37443	7.30041
1.471	6.52797	6.69924	6.54402	6.30337	6.10014	6.14103	6.3516	6.66279	6.43246	6.60083	5.62502	3.25059	3.67443	2.70982	3.46448	5.70585	5.64016	5.96583	7.42213	7.17327	7.41651	7.42431	7.47409	7.16693	7.29062	7.43959	7.37403	7.29999
1.472	6.52766	6.69891	6.54373	6.30301	6.09971	6.14063	6.35127	6.66244	6.4321	6.60046	5.62557	3.25119	3.67518	2.71036	3.46567	5.70602	5.64012	5.96562	7.42173	7.17285	7.41611	7.42392	7.47369	7.1665	7.29019	7.43919	7.37364	7.29956
1.473	6.52735	6.69858	6.54344	6.30265	6.09928	6.14022	6.35094	6.66208	6.43173	6.60008	5.62612	3.25179	3.67592	2.7109	3.46687	5.7062	5.64009	5.9654	7.42132	7.17242	7.4157	7.42352	7.4733	7.16607	7.28975	7.43879	7.37325	7.29914
1.474	6.52703	6.69825	6.54316	6.30228	6.09886	6.13982	6.3506	6.66172	6.43136	6.59971	5.62666	3.25239	3.67667	2.71145	3.46807	5.70637	5.64005	5.96519	7.42092	7.172	7.4153	7.42313	7.4729	7.16564	7.28931	7.43839	7.37285	7.29871
1.475	6.52672	6.69791	6.54287	6.30192	6.09843	6.13941	6.35027	6.66136	6.43099	6.59933	5.6272	3.25299	3.67742	2.71199	3.46927	5.70654	5.64002	5.96498	7.42052	7.17158	7.4149	7.42273	7.47251	7.16521	7.28888	7.43799	7.37246	7.29829
1.476	6.52641	6.69758	6.54258	6.30156	6.098	6.13901	6.34993	6.661	6.43062	6.59896	5.62774	3.25359	3.67816	2.71253	3.47046	5.7067	5.63998	5.96476	7.42012	7.17116	7.4145	7.42234	7.47211	7.16478	7.28844	7.43759	7.37207	7.29786
1.477	6.5261	6.69725	6.54229	6.3012	6.09757	6.1386	6.3496	6.66064	6.43025	6.59858	5.62828	3.25419	3.67891	2.71307	3.47166	5.70687	5.63994	5.96455	7.41972	7.17073	7.4141	7.42195	7.47172	7.16435	7.288	7.43719	7.37167	7.29744
1.478	6.52579	6.69692	6.54201	6.30084	6.09714	6.1382	6.34926	6.66028	6.42988	6.59821	5.62881	3.25479	3.67966	2.71361	3.47286	5.70703	5.6399	5.96433	7.41931	7.17031	7.41369	7.42155	7.47132	7.16392	7.28757	7.4368	7.37128	7.29701
1.479	6.52547	6.69658	6.54172	6.30047	6.09671	6.13779	6.34893	6.65992	6.42951	6.59783	5.62935	3.25539	3.6804	2.71415	3.47406	5.70719	5.63986	5.96412	7.41891	7.16989	7.41329	7.42116	7.47092	7.16349	7.28713	7.4364	7.37089	7.29658
1.48	6.52516	6.69625	6.54143	6.30011	6.09628	6.13738	6.34859	6.65956	6.42914	6.59745	5.62987	3.256	3.68115	2.71469	3.47525	5.70735	5.63982	5.9639	7.41851	7.16946	7.41289	7.42076	7.47053	7.16306	7.28669	7.436	7.37049	7.29616
1.481	6.52485	6.69591	6.54114	6.29975	6.09585	6.13698	6.34826	6.6592	6.42877	6.59708	5.6304	3.2566	3.6819	2.71523	3.47645	5.70751	5.63977	5.96368	7.41811	7.16904	7.41249	7.42036	7.47013	7.16263	7.28626	7.4356	7.3701	7.29573
1.482	6.52453	6.69558	6.54085	6.29939	6.09542	6.13657	6.34792	6.65884	6.4284	6.5967	5.63092	3.2572	3.68264	2.71577	3.47765	5.70767	5.63973	5.96346	7.4177	7.16862	7.41208	7.41997	7.46974	7.1622	7.28582	7.4352	7.3697	7.29531
1.483	6.52422	6.69525	6.54056	6.29902	6.09499	6.13616	6.34758	6.65848	6.42803	6.59632	5.63144	3.2578	3.68339	2.71631	3.47884	5.70782	5.63968	5.96325	7.4173	7.16819	7.41168	7.41957	7.46934	7.16176	7.28538	7.4348	7.36931	7.29488
1.484	6.52391	6.69491	6.54027	6.29866	6.09455	6.13575	6.34725	6.65812	6.42766	6.59594	5.63196	3.2584	3.68413	2.71685	3.48004	5.70797	5.63963	5.96303	7.4169	7.16777	7.41128	7.41918	7.46894	7.16133	7.28494	7.4344	7.36891	7.29445
1.485	6.52359	6.69458	6.53998	6.29829	6.09412	6.13534	6.34691	6.65776	6.42729	6.59557	5.63247	3.259	3.68488	2.71739	3.48124	5.70812	5.63959	5.96281	7.41649	7.16734	7.41087	7.41878	7.46855	7.1609	7.28451	7.434	7.36852	7.29403
1.486	6.52328	6.69424	6.53969	6.29793	6.09369	6.13493	6.34657	6.65739	6.42691	6.59519	5.63298	3.2596	3.68563	2.71793	3.48244	5.70827	5.63954	5.96259	7.41609	7.16692	7.41047	7.41839	7.46815	7.16047	7.28407	7.4336	7.36812	7.2936
1.487	6.52296	6.69391	6.5394	6.29756	6.09326	6.13452	6.34624	6.65703	6.42654	6.59481	5.63349	3.2602	3.68637	2.71847	3.48363	5.70842	5.63949	5.96237	7.41569	7.1665	7.41007	7.41799	7.46775	7.16004	7.28363	7.4332	7.36773	7.29317
1.488	6.52265	6.69357	6.53911	6.2972	6.09282	6.13411	6.3459	6.65667	6.42617	6.59443	5.63399	3.2608	3.68712	2.71901	3.48483	5.70856	5.63943	5.96214	7.41528	7.16607	7.40966	7.41759	7.46735	7.1596	7.28319	7.4328	7.36733	7.29274
1.489	6.52233	6.69324	6.53882	6.29683	6.09239	6.1337	6.34556	6.65631	6.4258	6.59405	5.6345	3.2614	3.68786	2.71955	3.48603	5.7087	5.63938	5.96192	7.41488	7.16565	7.40926	7.4172	7.46696	7.15917	7.28275	7.4324	7.36694	7.29232
1.49	6.52202	6.6929	6.53853	6.29647	6.09196	6.13329	6.34522	6.65595	6.42542	6.59367	5.635	3.262	3.68861	2.72009	3.48722	5.70884	5.63933	5.9617	7.41447	7.16522	7.40886	7.4168	7.46656	7.15874	7.28231	7.432	7.36654	7.29189
1.491	6.5217	6.69256	6.53824	6.2961	6.09152	6.13288	6.34488	6.65558	6.42505	6.59329	5.63549	3.2626	3.68935	2.72063	3.48842	5.70898	5.63927	5.96148	7.41407	7.1648	7.40845	7.4164	7.46616	7.15831	7.28188	7.4316	7.36614	7.29146
1.492	6.52139	6.69223	6.53794	6.29573	6.09109	6.13247	6.34454	6.65522	6.42468	6.59291	5.63599	3.2632	3.6901	2.72117	3.48962	5.70912	5.63922	5.96125	7.41367	7.16437	7.40805	7.41601	7.46576	7.15787	7.28144	7.4312	7.36575	7.29103
1.493	6.52107	6.69189	6.53765	6.29537	6.09065	6.13206	6.3442	6.65486	6.4243	6.59253	5.63648	3.26381	3.69085	2.72171	3.49081	5.70926	5.63916	5.96103	7.41326	7.16395	7.40764	7.41561	7.46537	7.15744	7.281	7.43079	7.36535	7.2906
1.494	6.52076	6.69156	6.53736	6.295	6.09022	6.13165	6.34386	6.65449	6.42393	6.59215	5.63696	3.26441	3.69159	2.72225	3.49201	5.70939	5.6391	5.9608	7.41286	7.16352	7.40724	7.41521	7.46497	7.15701	7.28056	7.43039	7.36496	7.29018
1.495	6.52044	6.69122	6.53707	6.29463	6.08978	6.13123	6.34352	6.65413	6.42356	6.59177	5.63745	3.26501	3.69234	2.72279	3.49321	5.70952	5.63904	5.96058	7.41245	7.16309	7.40683	7.41482	7.46457	7.15657	7.28012	7.42999	7.36456	7.28975
1.496	6.52012	6.69088	6.53678	6.29426	6.08934	6.13082	6.34318	6.65377	6.42318	6.59139	5.63793	3.26561	3.69308	2.72333	3.4944	5.70965	5.63898	5.96035	7.41205	7.16267	7.40643	7.41442	7.46417	7.15614	7.27968	7.42959	7.36416	7.28932
1.497	6.51981	6.69054	6.53648	6.2939	6.08891	6.13041	6.34284	6.6534	6.42281	6.59101	5.63841	3.26621	3.69383	2.72387	3.4956	5.70978	5.63892	5.96013	7.41164	7.16224	7.40602	7.41402	7.46377	7.15571	7.27924	7.42919	7.36377	7.28889
1.498	6.51949	6.69021	6.53619	6.29353	6.08847	6.12999	6.3425	6.65304	6.42243	6.59063	5.63889	3.26681	3.69457	2.72441	3.4968	5.70991	5.63886	5.9599	7.41124	7.16182	7.40562	7.41362	7.46338	7.15527	7.2788	7.42879	7.36337	7.28846
1.499	6.51917	6.68987	6.5359	6.29316	6.08803	6.12958	6.34216	6.65267	6.42206	6.59025	5.63936	3.26741	3.69532	2.72495	3.49799	5.71003	5.63879	5.95967	7.41083	7.16139	7.40521	7.41323	7.46298	7.15484	7.27836	7.42839	7.36297	7.28803
1.5	6.51885	6.68953	6.5356	6.29279	6.0876	6.12916	6.34182	6.65231	6.42168	6.58987	5.63983	3.26801	3.69606	2.72549	3.49919	5.71015	5.63873	5.95944	7.41043	7.16096	7.40481	7.41283	7.46258	7.1544	7.27792	7.42798	7.36258	7.2876
1.501	6.51854	6.68919	6.53531	6.29242	6.08716	6.12875	6.34147	6.65195	6.4213	6.58949	5.6403	3.26861	3.69681	2.72603	3.50038	5.71027	5.63866	5.95922	7.41002	7.16054	7.4044	7.41243	7.46218	7.15397	7.27748	7.42758	7.36218	7.28717
1.502	6.51822	6.68886	6.53502	6.29205	6.08672	6.12833	6.34113	6.65158	6.42093	6.58911	5.64077	3.26921	3.69755	2.72657	3.50158	5.71039	5.6386	5.95899	7.40962	7.16011	7.404	7.41203	7.46178	7.15353	7.27704	7.42718	7.36178	7.28675
1.503	6.5179	6.68852	6.53472	6.29168	6.08628	6.12792	6.34079	6.65122	6.42055	6.58872	5.64123	3.26981	3.6983	2.72711	3.50278	5.71051	5.63853	5.95876	7.40921	7.15968	7.40359	7.41163	7.46138	7.1531	7.2766	7.42678	7.36139	7.28632
1.504	6.51758	6.68818	6.53443	6.29131	6.08584	6.1275	6.34045	6.65085	6.42017	6.58834	5.64169	3.27041	3.69904	2.72765	3.50397	5.71063	5.63846	5.95853	7.4088	7.15926	7.40318	7.41124	7.46098	7.15267	7.27616	7.42638	7.36099	7.28589
1.505	6.51726	6.68784	6.53413	6.29094	6.08541	6.12709	6.3401	6.65048	6.4198	6.58796	5.64215	3.27101	3.69979	2.72819	3.50517	5.71074	5.63839	5.9583	7.4084	7.15883	7.40278	7.41084	7.46058	7.15223	7.27572	7.42597	7.36059	7.28546
1.506	6.51695	6.6875	6.53384	6.29057	6.08497	6.12667	6.33976	6.65012	6.41942	6.58758	5.6426	3.27161	3.70053	2.72873	3.50636	5.71085	5.63832	5.95806	7.40799	7.1584	7.40237	7.41044	7.46018	7.1518	7.27528	7.42557	7.36019	7.28503
1.507	6.51663	6.68716	6.53354	6.2902	6.08453	6.12625	6.33941	6.64975	6.41904	6.58719	5.64306	3.27221	3.70128	2.72927	3.50756	5.71097	5.63825	5.95783	7.40759	7.15797	7.40197	7.41004	7.45978	7.15136	7.27484	7.42517	7.35979	7.2846
1.508	6.51631	6.68682	6.53325	6.28983	6.08409	6.12584	6.33907	6.64939	6.41867	6.58681	5.64351	3.27281	3.70202	2.72981	3.50876	5.71107	5.63817	5.9576	7.40718	7.15755	7.40156	7.40964	7.45938	7.15092	7.2744	7.42476	7.3594	7.28417
1.509	6.51599	6.68648	6.53295	6.28946	6.08365	6.12542	6.33873	6.64902	6.41829	6.58643	5.64395	3.27341	3.70277	2.73035	3.50995	5.71118	5.6381	5.95737	7.40677	7.15712	7.40115	7.40924	7.45898	7.15049	7.27395	7.42436	7.359	7.28374
1.51	6.51567	6.68614	6.53266	6.28909	6.0832	6.125	6.33838	6.64865	6.41791	6.58604	5.6444	3.27401	3.70351	2.73089	3.51115	5.71129	5.63803	5.95713	7.40637	7.15669	7.40075	7.40884	7.45858	7.15005	7.27351	7.42396	7.3586	7.28331
1.511	6.51535	6.6858	6.53236	6.28871	6.08276	6.12458	6.33804	6.64829	6.41753	6.58566	5.64484	3.27461	3.70426	2.73143	3.51234	5.71139	5.63795	5.9569	7.40596	7.15626	7.40034	7.40844	7.45818	7.14962	7.27307	7.42355	7.3582	7.28287
1.512	6.51503	6.68546	6.53207	6.28834	6.08232	6.12416	6.33769	6.64792	6.41715	6.58528	5.64528	3.27521	3.705	2.73197	3.51354	5.71149	5.63787	5.95666	7.40555	7.15583	7.39993	7.40804	7.45778	7.14918	7.27263	7.42315	7.3578	7.28244
1.513	6.51471	6.68512	6.53177	6.28797	6.08188	6.12374	6.33735	6.64755	6.41677	6.58489	5.64571	3.27582	3.70575	2.73251	3.51473	5.71159	5.63779	5.95643	7.40515	7.15541	7.39953	7.40764	7.45738	7.14875	7.27219	7.42275	7.3574	7.28201
1.514	6.51439	6.68478	6.53147	6.2876	6.08144	6.12332	6.337	6.64719	6.41639	6.58451	5.64615	3.27642	3.70649	2.73305	3.51593	5.71169	5.63771	5.95619	7.40474	7.15498	7.39912	7.40724	7.45698	7.14831	7.27175	7.42234	7.35701	7.28158
1.515	6.51407	6.68444	6.53118	6.28722	6.081	6.1229	6.33665	6.64682	6.41601	6.58412	5.64658	3.27702	3.70724	2.73359	3.51712	5.71179	5.63763	5.95596	7.40433	7.15455	7.39871	7.40685	7.45658	7.14787	7.2713	7.42194	7.35661	7.28115
1.516	6.51375	6.6841	6.53088	6.28685	6.08055	6.12248	6.33631	6.64645	6.41563	6.58374	5.64701	3.27762	3.70798	2.73413	3.51832	5.71189	5.63755	5.95572	7.40392	7.15412	7.3983	7.40645	7.45618	7.14744	7.27086	7.42154	7.35621	7.28072
1.517	6.51342	6.68376	6.53058	6.28647	6.08011	6.12206	6.33596	6.64608	6.41525	6.58335	5.64743	3.27822	3.70873	2.73467	3.51952	5.71198	5.63747	5.95548	7.40352	7.15369	7.3979	7.40605	7.45578	7.147	7.27042	7.42113	7.35581	7.28029
1.518	6.5131	6.68342	6.53028	6.2861	6.07967	6.12164	6.33561	6.64571	6.41487	6.58297	5.64785	3.27882	3.70947	2.73521	3.52071	5.71207	5.63739	5.95525	7.40311	7.15326	7.39749	7.40564	7.45538	7.14656	7.26998	7.42073	7.35541	7.27986
1.519	6.51278	6.68308	6.52999	6.28573	6.07922	6.12122	6.33527	6.64535	6.41449	6.58258	5.64827	3.27942	3.71021	2.73575	3.52191	5.71216	5.6373	5.95501	7.4027	7.15283	7.39708	7.40524	7.45498	7.14613	7.26953	7.42032	7.35501	7.27942
1.52	6.51246	6.68273	6.52969	6.28535	6.07878	6.1208	6.33492	6.64498	6.41411	6.5822	5.64869	3.28002	3.71096	2.73629	3.5231	5.71225	5.63722	5.95477	7.40229	7.1524	7.39667	7.40484	7.45458	7.14569	7.26909	7.41992	7.35461	7.27899
1.521	6.51214	6.68239	6.52939	6.28498	6.07833	6.12038	6.33457	6.64461	6.41373	6.58181	5.64911	3.28062	3.7117	2.73683	3.5243	5.71234	5.63713	5.95453	7.40188	7.15197	7.39627	7.40444	7.45418	7.14525	7.26865	7.41951	7.35421	7.27856
1.522	6.51182	6.68205	6.52909	6.2846	6.07789	6.11995	6.33422	6.64424	6.41335	6.58142	5.64952	3.28122	3.71245	2.73737	3.52549	5.71243	5.63704	5.95429	7.40148	7.15154	7.39586	7.40404	7.45377	7.14481	7.2682	7.41911	7.35381	7.27813
1.523	6.51149	6.68171	6.52879	6.28423	6.07744	6.11953	6.33387	6.64387	6.41297	6.58104	5.64993	3.28182	3.71319	2.73791	3.52669	5.71251	5.63696	5.95405	7.40107	7.15111	7.39545	7.40364	7.45337	7.14438	7.26776	7.4187	7.35341	7.2777
1.524	6.51117	6.68136	6.52849	6.28385	6.077	6.11911	6.33352	6.6435	6.41259	6.58065	5.65034	3.28242	3.71394	2.73845	3.52788	5.71259	5.63687	5.95381	7.40066	7.15068	7.39504	7.40324	7.45297	7.14394	7.26732	7.4183	7.35301	7.27726
1.525	6.51085	6.68102	6.5282	6.28347	6.07655	6.11868	6.33318	6.64313	6.4122	6.58026	5.65074	3.28302	3.71468	2.73899	3.52907	5.71267	5.63678	5.95357	7.40025	7.15025	7.39463	7.40284	7.45257	7.1435	7.26687	7.41789	7.35261	7.27683
1.526	6.51052	6.68068	6.5279	6.2831	6.07611	6.11826	6.33283	6.64276	6.41182	6.57988	5.65114	3.28362	3.71542	2.73953	3.53027	5.71275	5.63669	5.95332	7.39984	7.14982	7.39422	7.40244	7.45217	7.14306	7.26643	7.41749	7.35221	7.2764
1.527	6.5102	6.68034	6.5276	6.28272	6.07566	6.11784	6.33248	6.64239	6.41144	6.57949	5.65154	3.28422	3.71617	2.74007	3.53146	5.71283	5.63659	5.95308	7.39943	7.14939	7.39381	7.40204	7.45176	7.14263	7.26599	7.41708	7.35181	7.27597
1.528	6.50988	6.67999	6.5273	6.28235	6.07521	6.11741	6.33213	6.64202	6.41106	6.5791	5.65194	3.28482	3.71691	2.74061	3.53266	5.71291	5.6365	5.95284	7.39902	7.14896	7.39341	7.40164	7.45136	7.14219	7.26554	7.41668	7.35141	7.27553
1.529	6.50955	6.67965	6.527	6.28197	6.07477	6.11699	6.33178	6.64165	6.41067	6.57872	5.65234	3.28542	3.71766	2.74115	3.53385	5.71298	5.63641	5.9526	7.39862	7.14853	7.393	7.40124	7.45096	7.14175	7.2651	7.41627	7.35101	7.2751
1.53	6.50923	6.67931	6.5267	6.28159	6.07432	6.11656	6.33143	6.64128	6.41029	6.57833	5.65273	3.28602	3.7184	2.74169	3.53505	5.71306	5.63631	5.95235	7.39821	7.1481	7.39259	7.40083	7.45056	7.14131	7.26465	7.41587	7.35061	7.27467
1.531	6.50891	6.67896	6.5264	6.28121	6.07387	6.11614	6.33107	6.64091	6.40991	6.57794	5.65312	3.28662	3.71914	2.74223	3.53624	5.71313	5.63622	5.95211	7.3978	7.14767	7.39218	7.40043	7.45016	7.14087	7.26421	7.41546	7.35021	7.27423
1.532	6.50858	6.67862	6.5261	6.28084	6.07343	6.11571	6.33072	6.64054	6.40952	6.57755	5.6535	3.28722	3.71989	2.74277	3.53744	5.7132	5.63612	5.95186	7.39739	7.14724	7.39177	7.40003	7.44975	7.14043	7.26377	7.41506	7.34981	7.2738
1.533	6.50826	6.67827	6.5258	6.28046	6.07298	6.11528	6.33037	6.64017	6.40914	6.57716	5.65389	3.28782	3.72063	2.74331	3.53863	5.71327	5.63602	5.95162	7.39698	7.14681	7.39136	7.39963	7.44935	7.13999	7.26332	7.41465	7.3494	7.27337
1.534	6.50793	6.67793	6.52549	6.28008	6.07253	6.11486	6.33002	6.6398	6.40875	6.57677	5.65427	3.28842	3.72137	2.74385	3.53983	5.71333	5.63592	5.95137	7.39657	7.14638	7.39095	7.39923	7.44895	7.13955	7.26288	7.41424	7.349	7.27293
1.535	6.50761	6.67758	6.52519	6.2797	6.07208	6.11443	6.32967	6.63943	6.40837	6.57639	5.65465	3.28902	3.72212	2.74439	3.54102	5.7134	5.63582	5.95112	7.39616	7.14595	7.39054	7.39882	7.44854	7.13912	7.26243	7.41384	7.3486	7.2725
1.536	6.50728	6.67724	6.52489	6.27932	6.07163	6.114	6.32932	6.63905	6.40798	6.576	5.65503	3.28962	3.72286	2.74493	3.54221	5.71346	5.63572	5.95088	7.39575	7.14551	7.39013	7.39842	7.44814	7.13868	7.26199	7.41343	7.3482	7.27206
1.537	6.50696	6.67689	6.52459	6.27894	6.07118	6.11358	6.32896	6.63868	6.4076	6.57561	5.6554	3.29022	3.7236	2.74547	3.54341	5.71352	5.63562	5.95063	7.39534	7.14508	7.38972	7.39802	7.44774	7.13824	7.26154	7.41302	7.3478	7.27163
1.538	6.50663	6.67655	6.52429	6.27856	6.07073	6.11315	6.32861	6.63831	6.40721	6.57522	5.65577	3.29082	3.72435	2.74601	3.5446	5.71358	5.63552	5.95038	7.39493	7.14465	7.38931	7.39762	7.44733	7.1378	7.2611	7.41262	7.3474	7.2712
1.539	6.5063	6.6762	6.52399	6.27818	6.07028	6.11272	6.32826	6.63794	6.40683	6.57483	5.65614	3.29142	3.72509	2.74655	3.5458	5.71364	5.63541	5.95013	7.39452	7.14422	7.3889	7.39721	7.44693	7.13736	7.26065	7.41221	7.34699	7.27076
1.54	6.50598	6.67586	6.52369	6.2778	6.06983	6.11229	6.3279	6.63757	6.40644	6.57444	5.65651	3.29202	3.72583	2.74709	3.54699	5.7137	5.63531	5.94988	7.39411	7.14379	7.38849	7.39681	7.44653	7.13692	7.26021	7.4118	7.34659	7.27033
1.541	6.50565	6.67551	6.52338	6.27742	6.06938	6.11186	6.32755	6.63719	6.40606	6.57405	5.65688	3.29262	3.72658	2.74763	3.54818	5.71376	5.6352	5.94963	7.3937	7.14335	7.38808	7.39641	7.44612	7.13648	7.25976	7.4114	7.34619	7.26989
1.542	6.50533	6.67517	6.52308	6.27704	6.06893	6.11143	6.3272	6.63682	6.40567	6.57366	5.65724	3.29322	3.72732	2.74817	3.54938	5.71381	5.6351	5.94938	7.39329	7.14292	7.38767	7.396	7.44572	7.13604	7.25931	7.41099	7.34579	7.26946
1.543	6.505	6.67482	6.52278	6.27666	6.06848	6.111	6.32684	6.63645	6.40528	6.57327	5.6576	3.29382	3.72806	2.74871	3.55057	5.71387	5.63499	5.94913	7.39288	7.14249	7.38726	7.3956	7.44531	7.1356	7.25887	7.41058	7.34539	7.26902
1.544	6.50467	6.67447	6.52247	6.27628	6.06803	6.11057	6.32649	6.63607	6.4049	6.57288	5.65796	3.29442	3.72881	2.74925	3.55176	5.71392	5.63488	5.94888	7.39246	7.14206	7.38685	7.3952	7.44491	7.13516	7.25842	7.41017	7.34498	7.26859
1.545	6.50435	6.67413	6.52217	6.2759	6.06757	6.11014	6.32613	6.6357	6.40451	6.57249	5.65831	3.29502	3.72955	2.74979	3.55296	5.71397	5.63477	5.94863	7.39205	7.14162	7.38643	7.39479	7.44451	7.13472	7.25798	7.40977	7.34458	7.26815
1.546	6.50402	6.67378	6.52187	6.27552	6.06712	6.10971	6.32578	6.63533	6.40412	6.57209	5.65866	3.29562	3.73029	2.75033	3.55415	5.71402	5.63466	5.94838	7.39164	7.14119	7.38602	7.39439	7.4441	7.13428	7.25753	7.40936	7.34418	7.26772
1.547	6.50369	6.67343	6.52156	6.27514	6.06667	6.10928	6.32542	6.63495	6.40374	6.5717	5.65901	3.29622	3.73104	2.75087	3.55534	5.71406	5.63455	5.94813	7.39123	7.14076	7.38561	7.39399	7.4437	7.13383	7.25708	7.40895	7.34377	7.26728
1.548	6.50336	6.67309	6.52126	6.27475	6.06622	6.10885	6.32507	6.63458	6.40335	6.57131	5.65936	3.29682	3.73178	2.75141	3.55654	5.71411	5.63444	5.94787	7.39082	7.14033	7.3852	7.39358	7.44329	7.13339	7.25664	7.40854	7.34337	7.26685
1.549	6.50304	6.67274	6.52096	6.27437	6.06576	6.10842	6.32471	6.6342	6.40296	6.57092	5.65971	3.29742	3.73252	2.75195	3.55773	5.71415	5.63433	5.94762	7.39041	7.13989	7.38479	7.39318	7.44289	7.13295	7.25619	7.40814	7.34297	7.26641
1.55	6.50271	6.67239	6.52065	6.27399	6.06531	6.10799	6.32436	6.63383	6.40257	6.57053	5.66005	3.29802	3.73326	2.75249	3.55892	5.7142	5.63421	5.94737	7.39	7.13946	7.38438	7.39278	7.44248	7.13251	7.25574	7.40773	7.34257	7.26597
1.551	6.50238	6.67205	6.52035	6.27361	6.06486	6.10755	6.324	6.63346	6.40218	6.57014	5.66039	3.29862	3.73401	2.75303	3.56012	5.71424	5.6341	5.94711	7.38958	7.13902	7.38397	7.39237	7.44208	7.13207	7.2553	7.40732	7.34216	7.26554
1.552	6.50205	6.6717	6.52004	6.27322	6.0644	6.10712	6.32364	6.63308	6.4018	6.56974	5.66073	3.29922	3.73475	2.75357	3.56131	5.71428	5.63398	5.94686	7.38917	7.13859	7.38355	7.39197	7.44167	7.13163	7.25485	7.40691	7.34176	7.2651
1.553	6.50172	6.67135	6.51974	6.27284	6.06395	6.10669	6.32329	6.63271	6.40141	6.56935	5.66107	3.29982	3.73549	2.75411	3.5625	5.71432	5.63387	5.9466	7.38876	7.13816	7.38314	7.39156	7.44127	7.13119	7.2544	7.4065	7.34135	7.26467
1.554	6.50139	6.671	6.51943	6.27246	6.06349	6.10625	6.32293	6.63233	6.40102	6.56896	5.6614	3.30042	3.73623	2.75465	3.5637	5.71435	5.63375	5.94635	7.38835	7.13772	7.38273	7.39116	7.44086	7.13075	7.25395	7.40609	7.34095	7.26423
1.555	6.50106	6.67065	6.51913	6.27207	6.06304	6.10582	6.32257	6.63196	6.40063	6.56857	5.66173	3.30102	3.73698	2.75519	3.56489	5.71439	5.63363	5.94609	7.38794	7.13729	7.38232	7.39075	7.44046	7.1303	7.25351	7.40569	7.34055	7.26379
1.556	6.50074	6.67031	6.51882	6.27169	6.06258	6.10539	6.32222	6.63158	6.40024	6.56817	5.66206	3.30162	3.73772	2.75573	3.56608	5.71442	5.63351	5.94583	7.38752	7.13685	7.38191	7.39035	7.44005	7.12986	7.25306	7.40528	7.34014	7.26336
1.557	6.50041	6.66996	6.51852	6.2713	6.06213	6.10495	6.32186	6.63121	6.39985	6.56778	5.66239	3.30222	3.73846	2.75627	3.56728	5.71446	5.63339	5.94558	7.38711	7.13642	7.38149	7.38994	7.43965	7.12942	7.25261	7.40487	7.33974	7.26292
1.558	6.50008	6.66961	6.51821	6.27092	6.06167	6.10452	6.3215	6.63083	6.39946	6.56739	5.66271	3.30281	3.7392	2.75681	3.56847	5.71449	5.63327	5.94532	7.3867	7.13599	7.38108	7.38954	7.43924	7.12898	7.25216	7.40446	7.33933	7.26248
1.559	6.49975	6.66926	6.51791	6.27053	6.06121	6.10408	6.32114	6.63045	6.39907	6.56699	5.66303	3.30341	3.73995	2.75735	3.56966	5.71452	5.63315	5.94506	7.38629	7.13555	7.38067	7.38913	7.43883	7.12853	7.25171	7.40405	7.33893	7.26205
1.56	6.49942	6.66891	6.5176	6.27015	6.06076	6.10365	6.32078	6.63008	6.39868	6.5666	5.66335	3.30401	3.74069	2.75789	3.57085	5.71455	5.63303	5.9448	7.38587	7.13512	7.38026	7.38873	7.43843	7.12809	7.25127	7.40364	7.33853	7.26161
1.561	6.49909	6.66856	6.51729	6.26976	6.0603	6.10321	6.32042	6.6297	6.39829	6.5662	5.66367	3.30461	3.74143	2.75843	3.57205	5.71457	5.63291	5.94454	7.38546	7.13468	7.37984	7.38832	7.43802	7.12765	7.25082	7.40323	7.33812	7.26117
1.562	6.49876	6.66821	6.51699	6.26938	6.05984	6.10278	6.32006	6.62932	6.3979	6.56581	5.66399	3.30521	3.74217	2.75897	3.57324	5.7146	5.63278	5.94428	7.38505	7.13425	7.37943	7.38792	7.43762	7.12721	7.25037	7.40282	7.33772	7.26073
1.563	6.49843	6.66786	6.51668	6.26899	6.05939	6.10234	6.31971	6.62895	6.3975	6.56542	5.6643	3.30581	3.74291	2.75951	3.57443	5.71462	5.63266	5.94402	7.38463	7.13381	7.37902	7.38751	7.43721	7.12676	7.24992	7.40241	7.33731	7.2603
1.564	6.4981	6.66751	6.51637	6.26861	6.05893	6.1019	6.31935	6.62857	6.39711	6.56502	5.66461	3.30641	3.74366	2.76005	3.57562	5.71465	5.63253	5.94376	7.38422	7.13338	7.3786	7.38711	7.4368	7.12632	7.24947	7.402	7.33691	7.25986
1.565	6.49776	6.66716	6.51607	6.26822	6.05847	6.10147	6.31899	6.62819	6.39672	6.56463	5.66492	3.30701	3.7444	2.76059	3.57682	5.71467	5.6324	5.9435	7.38381	7.13294	7.37819	7.3867	7.4364	7.12588	7.24902	7.40159	7.3365	7.25942
1.566	6.49743	6.66681	6.51576	6.26783	6.05801	6.10103	6.31863	6.62782	6.39633	6.56423	5.66522	3.30761	3.74514	2.76113	3.57801	5.71469	5.63228	5.94324	7.38339	7.1325	7.37778	7.38629	7.43599	7.12543	7.24857	7.40118	7.3361	7.25898
1.567	6.4971	6.66646	6.51545	6.26745	6.05755	6.10059	6.31827	6.62744	6.39594	6.56384	5.66553	3.30821	3.74588	2.76167	3.5792	5.71471	5.63215	5.94298	7.38298	7.13207	7.37736	7.38589	7.43558	7.12499	7.24813	7.40077	7.33569	7.25855
1.568	6.49677	6.66611	6.51514	6.26706	6.05709	6.10016	6.3179	6.62706	6.39555	6.56344	5.66583	3.30881	3.74662	2.76221	3.58039	5.71473	5.63202	5.94272	7.38257	7.13163	7.37695	7.38548	7.43518	7.12455	7.24768	7.40036	7.33529	7.25811
1.569	6.49644	6.66576	6.51483	6.26667	6.05664	6.09972	6.31754	6.62668	6.39515	6.56305	5.66613	3.30941	3.74737	2.76275	3.58158	5.71474	5.63189	5.94245	7.38215	7.1312	7.37654	7.38508	7.43477	7.1241	7.24723	7.39995	7.33488	7.25767
1.57	6.49611	6.66541	6.51453	6.26628	6.05618	6.09928	6.31718	6.62631	6.39476	6.56265	5.66643	3.31001	3.74811	2.76329	3.58278	5.71476	5.63176	5.94219	7.38174	7.13076	7.37612	7.38467	7.43436	7.12366	7.24678	7.39954	7.33448	7.25723
1.571	6.49577	6.66506	6.51422	6.2659	6.05572	6.09884	6.31682	6.62593	6.39437	6.56225	5.66672	3.31061	3.74885	2.76383	3.58397	5.71477	5.63163	5.94193	7.38133	7.13033	7.37571	7.38426	7.43396	7.12322	7.24633	7.39913	7.33407	7.25679
1.572	6.49544	6.66471	6.51391	6.26551	6.05526	6.0984	6.31646	6.62555	6.39397	6.56186	5.66701	3.31121	3.74959	2.76437	3.58516	5.71478	5.63149	5.94166	7.38091	7.12989	7.37529	7.38386	7.43355	7.12277	7.24588	7.39872	7.33366	7.25635
1.573	6.49511	6.66436	6.5136	6.26512	6.0548	6.09796	6.3161	6.62517	6.39358	6.56146	5.6673	3.31181	3.75033	2.76491	3.58635	5.71479	5.63136	5.9414	7.3805	7.12945	7.37488	7.38345	7.43314	7.12233	7.24543	7.39831	7.33326	7.25592
1.574	6.49478	6.664	6.51329	6.26473	6.05434	6.09752	6.31574	6.62479	6.39319	6.56106	5.66759	3.31241	3.75107	2.76545	3.58754	5.7148	5.63123	5.94113	7.38008	7.12902	7.37446	7.38304	7.43273	7.12188	7.24498	7.3979	7.33285	7.25548
1.575	6.49444	6.66365	6.51298	6.26434	6.05387	6.09708	6.31537	6.62441	6.39279	6.56067	5.66788	3.31301	3.75181	2.76599	3.58873	5.71481	5.63109	5.94087	7.37967	7.12858	7.37405	7.38264	7.43233	7.12144	7.24453	7.39749	7.33245	7.25504
1.576	6.49411	6.6633	6.51267	6.26395	6.05341	6.09664	6.31501	6.62403	6.3924	6.56027	5.66816	3.31361	3.75256	2.76653	3.58993	5.71482	5.63095	5.9406	7.37925	7.12814	7.37364	7.38223	7.43192	7.12099	7.24408	7.39708	7.33204	7.2546
1.577	6.49378	6.66295	6.51236	6.26356	6.05295	6.0962	6.31465	6.62366	6.392	6.55987	5.66844	3.3142	3.7533	2.76707	3.59112	5.71482	5.63082	5.94034	7.37884	7.12771	7.37322	7.38182	7.43151	7.12055	7.24363	7.39667	7.33163	7.25416
1.578	6.49344	6.6626	6.51205	6.26317	6.05249	6.09576	6.31428	6.62328	6.39161	6.55948	5.66872	3.3148	3.75404	2.76761	3.59231	5.71483	5.63068	5.94007	7.37842	7.12727	7.37281	7.38142	7.4311	7.1201	7.24318	7.39625	7.33123	7.25372
1.579	6.49311	6.66224	6.51174	6.26278	6.05203	6.09532	6.31392	6.6229	6.39122	6.55908	5.669	3.3154	3.75478	2.76815	3.5935	5.71483	5.63054	5.9398	7.37801	7.12683	7.37239	7.38101	7.43069	7.11966	7.24273	7.39584	7.33082	7.25328
1.58	6.49278	6.66189	6.51143	6.26239	6.05157	6.09488	6.31356	6.62252	6.39082	6.55868	5.66928	3.316	3.75552	2.76869	3.59469	5.71483	5.6304	5.93953	7.37759	7.12639	7.37198	7.3806	7.43029	7.11921	7.24228	7.39543	7.33041	7.25284
1.581	6.49244	6.66154	6.51112	6.262	6.0511	6.09444	6.31319	6.62214	6.39043	6.55828	5.66955	3.3166	3.75626	2.76923	3.59588	5.71483	5.63026	5.93927	7.37718	7.12596	7.37156	7.38019	7.42988	7.11877	7.24183	7.39502	7.33001	7.2524
1.582	6.49211	6.66119	6.51081	6.26161	6.05064	6.09399	6.31283	6.62176	6.39003	6.55789	5.66982	3.3172	3.757	2.76977	3.59707	5.71483	5.63012	5.939	7.37676	7.12552	7.37115	7.37979	7.42947	7.11832	7.24137	7.39461	7.3296	7.25196
1.583	6.49178	6.66083	6.5105	6.26122	6.05018	6.09355	6.31246	6.62138	6.38963	6.55749	5.67009	3.3178	3.75774	2.77031	3.59827	5.71483	5.62998	5.93873	7.37635	7.12508	7.37073	7.37938	7.42906	7.11788	7.24092	7.3942	7.32919	7.25152
1.584	6.49144	6.66048	6.51019	6.26083	6.04971	6.09311	6.3121	6.621	6.38924	6.55709	5.67036	3.3184	3.75848	2.77085	3.59946	5.71483	5.62984	5.93846	7.37593	7.12464	7.37031	7.37897	7.42865	7.11743	7.24047	7.39378	7.32879	7.25108
1.585	6.49111	6.66013	6.50988	6.26044	6.04925	6.09267	6.31173	6.62062	6.38884	6.55669	5.67062	3.319	3.75922	2.77139	3.60065	5.71482	5.6297	5.93819	7.37552	7.12421	7.3699	7.37856	7.42824	7.11699	7.24002	7.39337	7.32838	7.25064
1.586	6.49077	6.65977	6.50957	6.26005	6.04879	6.09222	6.31137	6.62024	6.38845	6.55629	5.67088	3.3196	3.75997	2.77193	3.60184	5.71481	5.62955	5.93792	7.3751	7.12377	7.36948	7.37815	7.42783	7.11654	7.23957	7.39296	7.32797	7.2502
1.587	6.49044	6.65942	6.50926	6.25966	6.04832	6.09178	6.311	6.61985	6.38805	6.55589	5.67114	3.3202	3.76071	2.77247	3.60303	5.71481	5.62941	5.93765	7.37469	7.12333	7.36907	7.37775	7.42742	7.11609	7.23912	7.39255	7.32756	7.24976
1.588	6.4901	6.65907	6.50895	6.25926	6.04786	6.09134	6.31064	6.61947	6.38765	6.55549	5.6714	3.3208	3.76145	2.77301	3.60422	5.7148	5.62926	5.93738	7.37427	7.12289	7.36865	7.37734	7.42702	7.11565	7.23867	7.39214	7.32716	7.24932
1.589	6.48977	6.65871	6.50864	6.25887	6.04739	6.09089	6.31027	6.61909	6.38726	6.55509	5.67166	3.3214	3.76219	2.77355	3.60541	5.71479	5.62911	5.93711	7.37385	7.12245	7.36824	7.37693	7.42661	7.1152	7.23821	7.39172	7.32675	7.24888
1.59	6.48943	6.65836	6.50832	6.25848	6.04693	6.09045	6.30991	6.61871	6.38686	6.55469	5.67191	3.32199	3.76293	2.77409	3.6066	5.71478	5.62897	5.93683	7.37344	7.12201	7.36782	7.37652	7.4262	7.11476	7.23776	7.39131	7.32634	7.24844
1.591	6.48909	6.658	6.50801	6.25809	6.04646	6.09	6.30954	6.61833	6.38646	6.55429	5.67216	3.32259	3.76367	2.77463	3.60779	5.71476	5.62882	5.93656	7.37302	7.12157	7.3674	7.37611	7.42579	7.11431	7.23731	7.3909	7.32593	7.248
1.592	6.48876	6.65765	6.5077	6.25769	6.046	6.08956	6.30917	6.61795	6.38606	6.5539	5.67241	3.32319	3.76441	2.77517	3.60898	5.71475	5.62867	5.93629	7.3726	7.12114	7.36699	7.3757	7.42538	7.11386	7.23686	7.39048	7.32552	7.24756
1.593	6.48842	6.65729	6.50739	6.2573	6.04553	6.08911	6.30881	6.61757	6.38567	6.5535	5.67266	3.32379	3.76515	2.77571	3.61017	5.71474	5.62852	5.93601	7.37219	7.1207	7.36657	7.37529	7.42497	7.11342	7.23641	7.39007	7.32512	7.24712
1.594	6.48809	6.65694	6.50707	6.25691	6.04506	6.08867	6.30844	6.61718	6.38527	6.55309	5.67291	3.32439	3.76589	2.77625	3.61136	5.71472	5.62837	5.93574	7.37177	7.12026	7.36615	7.37488	7.42456	7.11297	7.23595	7.38966	7.32471	7.24667
1.595	6.48775	6.65658	6.50676	6.25651	6.0446	6.08822	6.30807	6.6168	6.38487	6.55269	5.67315	3.32499	3.76663	2.77678	3.61255	5.7147	5.62822	5.93547	7.37135	7.11982	7.36574	7.37448	7.42415	7.11252	7.2355	7.38925	7.3243	7.24623
1.596	6.48741	6.65623	6.50645	6.25612	6.04413	6.08777	6.3077	6.61642	6.38447	6.55229	5.67339	3.32559	3.76737	2.77732	3.61374	5.71468	5.62807	5.93519	7.37094	7.11938	7.36532	7.37407	7.42374	7.11207	7.23505	7.38883	7.32389	7.24579
1.597	6.48708	6.65587	6.50614	6.25573	6.04366	6.08733	6.30734	6.61604	6.38407	6.55189	5.67363	3.32619	3.76811	2.77786	3.61493	5.71466	5.62792	5.93492	7.37052	7.11894	7.3649	7.37366	7.42333	7.11163	7.2346	7.38842	7.32348	7.24535
1.598	6.48674	6.65552	6.50582	6.25533	6.0432	6.08688	6.30697	6.61565	6.38367	6.55149	5.67387	3.32679	3.76885	2.7784	3.61612	5.71464	5.62776	5.93464	7.3701	7.1185	7.36449	7.37325	7.42292	7.11118	7.23414	7.38801	7.32307	7.24491
1.599	6.4864	6.65516	6.50551	6.25494	6.04273	6.08643	6.3066	6.61527	6.38327	6.55109	5.67411	3.32739	3.76959	2.77894	3.61731	5.71462	5.62761	5.93437	7.36969	7.11806	7.36407	7.37284	7.42251	7.11073	7.23369	7.38759	7.32266	7.24447
1.6	6.48606	6.65481	6.5052	6.25454	6.04226	6.08599	6.30623	6.61489	6.38288	6.55069	5.67434	3.32798	3.77033	2.77948	3.6185	5.7146	5.62745	5.93409	7.36927	7.11762	7.36365	7.37243	7.4221	7.11029	7.23324	7.38718	7.32226	7.24402
1.601	6.48573	6.65445	6.50488	6.25415	6.04179	6.08554	6.30586	6.61451	6.38248	6.55029	5.67457	3.32858	3.77107	2.78002	3.61969	5.71457	5.6273	5.93381	7.36885	7.11718	7.36323	7.37202	7.42169	7.10984	7.23278	7.38676	7.32185	7.24358
1.602	6.48539	6.65409	6.50457	6.25375	6.04132	6.08509	6.30549	6.61412	6.38208	6.54989	5.6748	3.32918	3.77181	2.78056	3.62088	5.71455	5.62714	5.93354	7.36844	7.11674	7.36282	7.37161	7.42128	7.10939	7.23233	7.38635	7.32144	7.24314
1.603	6.48505	6.65374	6.50425	6.25336	6.04086	6.08464	6.30512	6.61374	6.38168	6.54948	5.67503	3.32978	3.77255	2.7811	3.62207	5.71452	5.62698	5.93326	7.36802	7.1163	7.3624	7.3712	7.42087	7.10894	7.23188	7.38594	7.32103	7.2427
1.604	6.48471	6.65338	6.50394	6.25296	6.04039	6.08419	6.30476	6.61335	6.38128	6.54908	5.67525	3.33038	3.77329	2.78164	3.62326	5.71449	5.62683	5.93298	7.3676	7.11586	7.36198	7.37079	7.42046	7.10849	7.23142	7.38552	7.32062	7.24226
1.605	6.48438	6.65302	6.50362	6.25256	6.03992	6.08374	6.30439	6.61297	6.38088	6.54868	5.67548	3.33098	3.77403	2.78218	3.62445	5.71446	5.62667	5.9327	7.36718	7.11542	7.36156	7.37038	7.42005	7.10805	7.23097	7.38511	7.32021	7.24181
1.606	6.48404	6.65267	6.50331	6.25217	6.03945	6.08329	6.30402	6.61259	6.38048	6.54828	5.6757	3.33158	3.77477	2.78272	3.62564	5.71443	5.62651	5.93242	7.36676	7.11498	7.36115	7.36997	7.41963	7.1076	7.23052	7.38469	7.3198	7.24137
1.607	6.4837	6.65231	6.50299	6.25177	6.03898	6.08285	6.30365	6.6122	6.38007	6.54788	5.67592	3.33218	3.77551	2.78326	3.62683	5.7144	5.62635	5.93214	7.36635	7.11454	7.36073	7.36956	7.41922	7.10715	7.23006	7.38428	7.31939	7.24093
1.608	6.48336	6.65195	6.50268	6.25138	6.03851	6.0824	6.30327	6.61182	6.37967	6.54747	5.67614	3.33278	3.77625	2.7838	3.62802	5.71437	5.62619	5.93187	7.36593	7.1141	7.36031	7.36915	7.41881	7.1067	7.22961	7.38387	7.31898	7.24049
1.609	6.48302	6.6516	6.50236	6.25098	6.03804	6.08195	6.3029	6.61143	6.37927	6.54707	5.67635	3.33337	3.77699	2.78434	3.62921	5.71433	5.62602	5.93159	7.36551	7.11366	7.35989	7.36874	7.4184	7.10625	7.22915	7.38345	7.31857	7.24004
1.61	6.48268	6.65124	6.50205	6.25058	6.03757	6.0815	6.30253	6.61105	6.37887	6.54667	5.67657	3.33397	3.77773	2.78488	3.6304	5.7143	5.62586	5.93131	7.36509	7.11322	7.35947	7.36833	7.41799	7.1058	7.2287	7.38304	7.31816	7.2396
1.611	6.48234	6.65088	6.50173	6.25018	6.0371	6.08104	6.30216	6.61066	6.37847	6.54626	5.67678	3.33457	3.77847	2.78542	3.63159	5.71426	5.6257	5.93102	7.36467	7.11278	7.35905	7.36792	7.41758	7.10535	7.22825	7.38262	7.31775	7.23916
1.612	6.482	6.65052	6.50142	6.24979	6.03663	6.08059	6.30179	6.61028	6.37807	6.54586	5.67699	3.33517	3.7792	2.78596	3.63277	5.71422	5.62554	5.93074	7.36425	7.11233	7.35864	7.36751	7.41717	7.10491	7.22779	7.38221	7.31734	7.23871
1.613	6.48166	6.65017	6.5011	6.24939	6.03616	6.08014	6.30142	6.60989	6.37767	6.54546	5.6772	3.33577	3.77994	2.7865	3.63396	5.71418	5.62537	5.93046	7.36384	7.11189	7.35822	7.36709	7.41676	7.10446	7.22734	7.38179	7.31693	7.23827
1.614	6.48132	6.64981	6.50079	6.24899	6.03568	6.07969	6.30105	6.60951	6.37726	6.54505	5.6774	3.33637	3.78068	2.78704	3.63515	5.71414	5.62521	5.93018	7.36342	7.11145	7.3578	7.36668	7.41634	7.10401	7.22688	7.38138	7.31652	7.23783
1.615	6.48098	6.64945	6.50047	6.24859	6.03521	6.07924	6.30068	6.60912	6.37686	6.54465	5.67761	3.33697	3.78142	2.78758	3.63634	5.7141	5.62504	5.9299	7.363	7.11101	7.35738	7.36627	7.41593	7.10356	7.22643	7.38096	7.31611	7.23738
1.616	6.48064	6.64909	6.50015	6.24819	6.03474	6.07879	6.3003	6.60874	6.37646	6.54425	5.67781	3.33756	3.78216	2.78812	3.63753	5.71406	5.62487	5.92961	7.36258	7.11057	7.35696	7.36586	7.41552	7.10311	7.22597	7.38055	7.3157	7.23694
1.617	6.4803	6.64873	6.49984	6.2478	6.03427	6.07833	6.29993	6.60835	6.37606	6.54384	5.67801	3.33816	3.7829	2.78866	3.63872	5.71402	5.62471	5.92933	7.36216	7.11013	7.35654	7.36545	7.41511	7.10266	7.22552	7.38013	7.31529	7.2365
1.618	6.47996	6.64837	6.49952	6.2474	6.03379	6.07788	6.29956	6.60797	6.37565	6.54344	5.67821	3.33876	3.78364	2.7892	3.63991	5.71397	5.62454	5.92905	7.36174	7.10969	7.35612	7.36504	7.4147	7.10221	7.22506	7.37971	7.31488	7.23605
1.619	6.47962	6.64802	6.4992	6.247	6.03332	6.07743	6.29919	6.60758	6.37525	6.54303	5.6784	3.33936	3.78438	2.78974	3.6411	5.71393	5.62437	5.92876	7.36132	7.10924	7.3557	7.36463	7.41428	7.10176	7.22461	7.3793	7.31447	7.23561
1.62	6.47928	6.64766	6.49888	6.2466	6.03285	6.07698	6.29881	6.60719	6.37485	6.54263	5.6786	3.33996	3.78512	2.79028	3.64228	5.71388	5.6242	5.92848	7.3609	7.1088	7.35528	7.36421	7.41387	7.10131	7.22415	7.37888	7.31406	7.23516
1.621	6.47894	6.6473	6.49857	6.2462	6.03238	6.07652	6.29844	6.60681	6.37444	6.54222	5.67879	3.34056	3.78586	2.79082	3.64347	5.71383	5.62403	5.9282	7.36048	7.10836	7.35487	7.3638	7.41346	7.10086	7.2237	7.37847	7.31364	7.23472
1.622	6.4786	6.64694	6.49825	6.2458	6.0319	6.07607	6.29807	6.60642	6.37404	6.54182	5.67898	3.34116	3.78659	2.79136	3.64466	5.71378	5.62386	5.92791	7.36006	7.10792	7.35445	7.36339	7.41305	7.10041	7.22324	7.37805	7.31323	7.23427
1.623	6.47826	6.64658	6.49793	6.2454	6.03143	6.07562	6.29769	6.60603	6.37364	6.54141	5.67917	3.34175	3.78733	2.7919	3.64585	5.71373	5.62369	5.92762	7.35964	7.10747	7.35403	7.36298	7.41263	7.09996	7.22279	7.37764	7.31282	7.23383
1.624	6.47792	6.64622	6.49761	6.245	6.03095	6.07516	6.29732	6.60565	6.37323	6.54101	5.67936	3.34235	3.78807	2.79243	3.64704	5.71368	5.62351	5.92734	7.35922	7.10703	7.35361	7.36257	7.41222	7.09951	7.22233	7.37722	7.31241	7.23339
1.625	6.47757	6.64586	6.4973	6.2446	6.03048	6.07471	6.29694	6.60526	6.37283	6.5406	5.67954	3.34295	3.78881	2.79297	3.64822	5.71363	5.62334	5.92705	7.3588	7.10659	7.35319	7.36215	7.41181	7.09906	7.22187	7.3768	7.312	7.23294
1.626	6.47723	6.6455	6.49698	6.2442	6.03	6.07425	6.29657	6.60487	6.37242	6.54019	5.67973	3.34355	3.78955	2.79351	3.64941	5.71357	5.62317	5.92677	7.35839	7.10615	7.35277	7.36174	7.4114	7.09861	7.22142	7.37639	7.31159	7.2325
1.627	6.47689	6.64514	6.49666	6.2438	6.02953	6.0738	6.29619	6.60449	6.37202	6.53979	5.67991	3.34415	3.79029	2.79405	3.6506	5.71352	5.62299	5.92648	7.35797	7.1057	7.35235	7.36133	7.41098	7.09816	7.22096	7.37597	7.31118	7.23205
1.628	6.47655	6.64478	6.49634	6.2434	6.02905	6.07334	6.29582	6.6041	6.37161	6.53938	5.68009	3.34475	3.79102	2.79459	3.65179	5.71346	5.62282	5.92619	7.35754	7.10526	7.35193	7.36092	7.41057	7.09771	7.22051	7.37555	7.31076	7.23161
1.629	6.47621	6.64442	6.49602	6.243	6.02858	6.07289	6.29544	6.60371	6.37121	6.53898	5.68027	3.34535	3.79176	2.79513	3.65298	5.71341	5.62264	5.9259	7.35712	7.10482	7.35151	7.36051	7.41016	7.09725	7.22005	7.37514	7.31035	7.23116
1.63	6.47586	6.64406	6.4957	6.24259	6.0281	6.07243	6.29507	6.60332	6.3708	6.53857	5.68044	3.34594	3.7925	2.79567	3.65416	5.71335	5.62246	5.92562	7.3567	7.10437	7.35109	7.36009	7.40974	7.0968	7.21959	7.37472	7.30994	7.23072
1.631	6.47552	6.6437	6.49538	6.24219	6.02763	6.07197	6.29469	6.60293	6.3704	6.53816	5.68062	3.34654	3.79324	2.79621	3.65535	5.71329	5.62229	5.92533	7.35628	7.10393	7.35067	7.35968	7.40933	7.09635	7.21914	7.3743	7.30953	7.23027
1.632	6.47518	6.64334	6.49507	6.24179	6.02715	6.07152	6.29432	6.60255	6.36999	6.53776	5.68079	3.34714	3.79398	2.79675	3.65654	5.71323	5.62211	5.92504	7.35586	7.10349	7.35025	7.35927	7.40892	7.0959	7.21868	7.37389	7.30912	7.22982
1.633	6.47484	6.64298	6.49475	6.24139	6.02667	6.07106	6.29394	6.60216	6.36959	6.53735	5.68096	3.34774	3.79472	2.79729	3.65772	5.71317	5.62193	5.92475	7.35544	7.10304	7.34982	7.35885	7.4085	7.09545	7.21822	7.37347	7.3087	7.22938
1.634	6.47449	6.64262	6.49443	6.24099	6.0262	6.0706	6.29357	6.60177	6.36918	6.53694	5.68113	3.34834	3.79545	2.79783	3.65891	5.71311	5.62175	5.92446	7.35502	7.1026	7.3494	7.35844	7.40809	7.095	7.21777	7.37305	7.30829	7.22893
1.635	6.47415	6.64225	6.49411	6.24058	6.02572	6.07015	6.29319	6.60138	6.36877	6.53654	5.6813	3.34894	3.79619	2.79837	3.6601	5.71304	5.62157	5.92417	7.3546	7.10216	7.34898	7.35803	7.40767	7.09455	7.21731	7.37264	7.30788	7.22849
1.636	6.47381	6.64189	6.49379	6.24018	6.02524	6.06969	6.29281	6.60099	6.36837	6.53613	5.68146	3.34953	3.79693	2.79891	3.66129	5.71298	5.62139	5.92388	7.35418	7.10171	7.34856	7.35761	7.40726	7.09409	7.21685	7.37222	7.30747	7.22804
1.637	6.47346	6.64153	6.49347	6.23978	6.02477	6.06923	6.29244	6.6006	6.36796	6.53572	5.68163	3.35013	3.79767	2.79945	3.66247	5.71291	5.62121	5.92359	7.35376	7.10127	7.34814	7.3572	7.40685	7.09364	7.21639	7.3718	7.30705	7.2276
1.638	6.47312	6.64117	6.49315	6.23938	6.02429	6.06877	6.29206	6.60021	6.36755	6.53531	5.68179	3.35073	3.7984	2.79999	3.66366	5.71285	5.62103	5.9233	7.35334	7.10082	7.34772	7.35679	7.40643	7.09319	7.21594	7.37138	7.30664	7.22715
1.639	6.47277	6.64081	6.49283	6.23897	6.02381	6.06831	6.29168	6.59983	6.36715	6.5349	5.68195	3.35133	3.79914	2.80053	3.66485	5.71278	5.62084	5.923	7.35292	7.10038	7.3473	7.35637	7.40602	7.09274	7.21548	7.37097	7.30623	7.2267
1.64	6.47243	6.64045	6.49251	6.23857	6.02333	6.06786	6.2913	6.59944	6.36674	6.5345	5.68211	3.35193	3.79988	2.80107	3.66603	5.71271	5.62066	5.92271	7.3525	7.09994	7.34688	7.35596	7.4056	7.09229	7.21502	7.37055	7.30582	7.22626
1.641	6.47209	6.64008	6.49219	6.23817	6.02285	6.0674	6.29093	6.59905	6.36633	6.53409	5.68226	3.35253	3.80062	2.80161	3.66722	5.71264	5.62048	5.92242	7.35207	7.09949	7.34646	7.35555	7.40519	7.09183	7.21456	7.37013	7.3054	7.22581
1.642	6.47174	6.63972	6.49186	6.23776	6.02237	6.06694	6.29055	6.59866	6.36592	6.53368	5.68242	3.35312	3.80135	2.80215	3.66841	5.71257	5.62029	5.92213	7.35165	7.09905	7.34603	7.35513	7.40478	7.09138	7.21411	7.36971	7.30499	7.22536
1.643	6.4714	6.63936	6.49154	6.23736	6.0219	6.06648	6.29017	6.59827	6.36552	6.53327	5.68257	3.35372	3.80209	2.80269	3.66959	5.7125	5.62011	5.92183	7.35123	7.0986	7.34561	7.35472	7.40436	7.09093	7.21365	7.36929	7.30458	7.22492
1.644	6.47105	6.639	6.49122	6.23695	6.02142	6.06602	6.28979	6.59788	6.36511	6.53286	5.68272	3.35432	3.80283	2.80323	3.67078	5.71242	5.61992	5.92154	7.35081	7.09816	7.34519	7.35431	7.40395	7.09048	7.21319	7.36888	7.30416	7.22447
1.645	6.47071	6.63863	6.4909	6.23655	6.02094	6.06556	6.28941	6.59749	6.3647	6.53245	5.68287	3.35492	3.80357	2.80376	3.67197	5.71235	5.61973	5.92125	7.35039	7.09771	7.34477	7.35389	7.40353	7.09002	7.21273	7.36846	7.30375	7.22402
1.646	6.47036	6.63827	6.49058	6.23614	6.02046	6.0651	6.28903	6.5971	6.36429	6.53204	5.68302	3.35552	3.8043	2.8043	3.67315	5.71228	5.61955	5.92095	7.34997	7.09727	7.34435	7.35348	7.40312	7.08957	7.21227	7.36804	7.30334	7.22358
1.647	6.47002	6.63791	6.49026	6.23574	6.01998	6.06464	6.28865	6.59671	6.36388	6.53164	5.68316	3.35611	3.80504	2.80484	3.67434	5.7122	5.61936	5.92066	7.34954	7.09682	7.34393	7.35306	7.4027	7.08912	7.21182	7.36762	7.30292	7.22313
1.648	6.46967	6.63755	6.48994	6.23533	6.0195	6.06418	6.28828	6.59632	6.36347	6.53123	5.68331	3.35671	3.80578	2.80538	3.67553	5.71212	5.61917	5.92036	7.34912	7.09638	7.3435	7.35265	7.40229	7.08867	7.21136	7.3672	7.30251	7.22268
1.649	6.46933	6.63718	6.48961	6.23493	6.01902	6.06372	6.2879	6.59593	6.36306	6.53082	5.68345	3.35731	3.80651	2.80592	3.67671	5.71205	5.61898	5.92007	7.3487	7.09593	7.34308	7.35223	7.40187	7.08821	7.2109	7.36678	7.30209	7.22224
1.65	6.46898	6.63682	6.48929	6.23452	6.01854	6.06325	6.28752	6.59553	6.36266	6.53041	5.68359	3.35791	3.80725	2.80646	3.6779	5.71197	5.61879	5.91977	7.34828	7.09549	7.34266	7.35182	7.40146	7.08776	7.21044	7.36637	7.30168	7.22179
1.651	6.46864	6.63646	6.48897	6.23412	6.01806	6.06279	6.28714	6.59514	6.36225	6.53	5.68373	3.35851	3.80799	2.807	3.67908	5.71189	5.6186	5.91948	7.34785	7.09504	7.34224	7.3514	7.40104	7.08731	7.20998	7.36595	7.30127	7.22134
1.652	6.46829	6.63609	6.48865	6.23371	6.01757	6.06233	6.28676	6.59475	6.36184	6.52959	5.68387	3.3591	3.80873	2.80754	3.68027	5.71181	5.61841	5.91918	7.34743	7.09459	7.34181	7.35099	7.40063	7.08685	7.20952	7.36553	7.30085	7.22089
1.653	6.46794	6.63573	6.48832	6.2333	6.01709	6.06187	6.28638	6.59436	6.36143	6.52918	5.68401	3.3597	3.80946	2.80808	3.68145	5.71172	5.61822	5.91888	7.34701	7.09415	7.34139	7.35057	7.40021	7.0864	7.20906	7.36511	7.30044	7.22045
1.654	6.4676	6.63536	6.488	6.2329	6.01661	6.06141	6.286	6.59397	6.36102	6.52877	5.68414	3.3603	3.8102	2.80862	3.68264	5.71164	5.61802	5.91859	7.34659	7.0937	7.34097	7.35016	7.39979	7.08594	7.2086	7.36469	7.30002	7.22
1.655	6.46725	6.635	6.48768	6.23249	6.01613	6.06094	6.28561	6.59358	6.36061	6.52836	5.68427	3.3609	3.81094	2.80916	3.68383	5.71156	5.61783	5.91829	7.34616	7.09326	7.34055	7.34974	7.39938	7.08549	7.20815	7.36427	7.29961	7.21955
1.656	6.4669	6.63464	6.48736	6.23208	6.01565	6.06048	6.28523	6.59319	6.3602	6.52795	5.6844	3.3615	3.81167	2.8097	3.68501	5.71147	5.61764	5.91799	7.34574	7.09281	7.34012	7.34933	7.39896	7.08504	7.20769	7.36385	7.29919	7.2191
1.657	6.46656	6.63427	6.48703	6.23168	6.01516	6.06002	6.28485	6.59279	6.35979	6.52753	5.68453	3.36209	3.81241	2.81024	3.6862	5.71139	5.61744	5.91769	7.34532	7.09236	7.3397	7.34891	7.39855	7.08458	7.20723	7.36343	7.29878	7.21865
1.658	6.46621	6.63391	6.48671	6.23127	6.01468	6.05956	6.28447	6.5924	6.35938	6.52712	5.68466	3.36269	3.81315	2.81078	3.68738	5.7113	5.61725	5.91739	7.3449	7.09192	7.33928	7.3485	7.39813	7.08413	7.20677	7.36301	7.29836	7.21821
1.659	6.46586	6.63354	6.48639	6.23086	6.0142	6.05909	6.28409	6.59201	6.35896	6.52671	5.68479	3.36329	3.81388	2.81132	3.68857	5.71121	5.61705	5.91709	7.34447	7.09147	7.33885	7.34808	7.39771	7.08367	7.20631	7.36259	7.29795	7.21776
1.66	6.46552	6.63318	6.48606	6.23046	6.01372	6.05863	6.28371	6.59162	6.35855	6.5263	5.68491	3.36389	3.81462	2.81186	3.68975	5.71112	5.61685	5.9168	7.34405	7.09103	7.33843	7.34767	7.3973	7.08322	7.20585	7.36217	7.29754	7.21731
1.661	6.46517	6.63281	6.48574	6.23005	6.01323	6.05816	6.28333	6.59123	6.35814	6.52589	5.68503	3.36449	3.81535	2.8124	3.69094	5.71103	5.61666	5.9165	7.34363	7.09058	7.33801	7.34725	7.39688	7.08277	7.20539	7.36175	7.29712	7.21686
1.662	6.46482	6.63245	6.48541	6.22964	6.01275	6.0577	6.28294	6.59083	6.35773	6.52548	5.68515	3.36508	3.81609	2.81294	3.69212	5.71094	5.61646	5.9162	7.3432	7.09013	7.33758	7.34684	7.39647	7.08231	7.20493	7.36133	7.29671	7.21641
1.663	6.46447	6.63208	6.48509	6.22923	6.01227	6.05724	6.28256	6.59044	6.35732	6.52507	5.68527	3.36568	3.81683	2.81347	3.69331	5.71085	5.61626	5.9159	7.34278	7.08969	7.33716	7.34642	7.39605	7.08186	7.20447	7.36091	7.29629	7.21596
1.664	6.46413	6.63172	6.48477	6.22882	6.01178	6.05677	6.28218	6.59005	6.35691	6.52465	5.68539	3.36628	3.81756	2.81401	3.69449	5.71076	5.61606	5.9156	7.34236	7.08924	7.33674	7.34601	7.39563	7.0814	7.20401	7.36049	7.29587	7.21551
1.665	6.46378	6.63135	6.48444	6.22841	6.0113	6.05631	6.2818	6.58966	6.3565	6.52424	5.68551	3.36688	3.8183	2.81455	3.69568	5.71066	5.61586	5.91529	7.34193	7.08879	7.33631	7.34559	7.39522	7.08095	7.20355	7.36007	7.29546	7.21507
1.666	6.46343	6.63099	6.48412	6.22801	6.01081	6.05584	6.28141	6.58926	6.35608	6.52383	5.68562	3.36747	3.81903	2.81509	3.69686	5.71057	5.61566	5.91499	7.34151	7.08834	7.33589	7.34517	7.3948	7.08049	7.20309	7.35965	7.29504	7.21462
1.667	6.46308	6.63062	6.48379	6.2276	6.01033	6.05537	6.28103	6.58887	6.35567	6.52342	5.68574	3.36807	3.81977	2.81563	3.69805	5.71047	5.61546	5.91469	7.34108	7.0879	7.33547	7.34476	7.39438	7.08004	7.20263	7.35923	7.29463	7.21417
1.668	6.46273	6.63026	6.48347	6.22719	6.00984	6.05491	6.28065	6.58848	6.35526	6.52301	5.68585	3.36867	3.82051	2.81617	3.69923	5.71038	5.61526	5.91439	7.34066	7.08745	7.33504	7.34434	7.39397	7.07958	7.20217	7.35881	7.29421	7.21372
1.669	6.46239	6.62989	6.48314	6.22678	6.00936	6.05444	6.28026	6.58808	6.35485	6.52259	5.68596	3.36927	3.82124	2.81671	3.70041	5.71028	5.61506	5.91409	7.34024	7.087	7.33462	7.34392	7.39355	7.07913	7.20171	7.35839	7.2938	7.21327
1.67	6.46204	6.62952	6.48282	6.22637	6.00887	6.05398	6.27988	6.58769	6.35443	6.52218	5.68606	3.36986	3.82198	2.81725	3.7016	5.71018	5.61486	5.91378	7.33981	7.08655	7.33419	7.34351	7.39313	7.07867	7.20125	7.35797	7.29338	7.21282
1.671	6.46169	6.62916	6.48249	6.22596	6.00839	6.05351	6.2795	6.58729	6.35402	6.52177	5.68617	3.37046	3.82271	2.81779	3.70278	5.71008	5.61465	5.91348	7.33939	7.08611	7.33377	7.34309	7.39272	7.07822	7.20079	7.35755	7.29297	7.21237
1.672	6.46134	6.62879	6.48217	6.22555	6.0079	6.05304	6.27911	6.5869	6.35361	6.52135	5.68628	3.37106	3.82345	2.81833	3.70397	5.70998	5.61445	5.91318	7.33896	7.08566	7.33335	7.34267	7.3923	7.07776	7.20032	7.35713	7.29255	7.21192
1.673	6.46099	6.62842	6.48184	6.22514	6.00742	6.05258	6.27873	6.58651	6.35319	6.52094	5.68638	3.37166	3.82418	2.81887	3.70515	5.70988	5.61425	5.91287	7.33854	7.08521	7.33292	7.34226	7.39188	7.0773	7.19986	7.35671	7.29213	7.21147
1.674	6.46064	6.62806	6.48152	6.22473	6.00693	6.05211	6.27834	6.58611	6.35278	6.52053	5.68648	3.37225	3.82492	2.81941	3.70633	5.70978	5.61404	5.91257	7.33811	7.08476	7.3325	7.34184	7.39146	7.07685	7.1994	7.35629	7.29172	7.21102
1.675	6.46029	6.62769	6.48119	6.22432	6.00644	6.05164	6.27796	6.58572	6.35237	6.52011	5.68658	3.37285	3.82565	2.81995	3.70752	5.70967	5.61383	5.91227	7.33769	7.08432	7.33207	7.34142	7.39105	7.07639	7.19894	7.35587	7.2913	7.21057
1.676	6.45994	6.62732	6.48086	6.22391	6.00596	6.05117	6.27757	6.58532	6.35195	6.5197	5.68668	3.37345	3.82639	2.82049	3.7087	5.70957	5.61363	5.91196	7.33726	7.08387	7.33165	7.34101	7.39063	7.07594	7.19848	7.35545	7.29088	7.21012
1.677	6.45959	6.62696	6.48054	6.2235	6.00547	6.0507	6.27719	6.58493	6.35154	6.51929	5.68678	3.37405	3.82713	2.82103	3.70989	5.70946	5.61342	5.91166	7.33684	7.08342	7.33122	7.34059	7.39021	7.07548	7.19802	7.35503	7.29047	7.20967
1.678	6.45924	6.62659	6.48021	6.22309	6.00498	6.05024	6.2768	6.58453	6.35112	6.51887	5.68687	3.37465	3.82786	2.82156	3.71107	5.70936	5.61321	5.91135	7.33642	7.08297	7.3308	7.34017	7.38979	7.07502	7.19756	7.35461	7.29005	7.20922
1.679	6.45889	6.62622	6.47988	6.22267	6.00449	6.04977	6.27642	6.58414	6.35071	6.51846	5.68697	3.37524	3.8286	2.8221	3.71225	5.70925	5.61301	5.91104	7.33599	7.08252	7.33037	7.33976	7.38937	7.07457	7.1971	7.35418	7.28963	7.20877
1.68	6.45854	6.62585	6.47956	6.22226	6.00401	6.0493	6.27603	6.58374	6.3503	6.51804	5.68706	3.37584	3.82933	2.82264	3.71344	5.70914	5.6128	5.91074	7.33557	7.08207	7.32995	7.33934	7.38896	7.07411	7.19663	7.35376	7.28922	7.20832
1.681	6.45819	6.62549	6.47923	6.22185	6.00352	6.04883	6.27565	6.58335	6.34988	6.51763	5.68715	3.37644	3.83007	2.82318	3.71462	5.70903	5.61259	5.91043	7.33514	7.08162	7.32952	7.33892	7.38854	7.07366	7.19617	7.35334	7.2888	7.20787
1.682	6.45784	6.62512	6.4789	6.22144	6.00303	6.04836	6.27526	6.58295	6.34947	6.51721	5.68724	3.37703	3.8308	2.82372	3.7158	5.70892	5.61238	5.91012	7.33471	7.08118	7.3291	7.3385	7.38812	7.0732	7.19571	7.35292	7.28838	7.20742
1.683	6.45749	6.62475	6.47858	6.22103	6.00254	6.04789	6.27487	6.58256	6.34905	6.5168	5.68733	3.37763	3.83153	2.82426	3.71699	5.70881	5.61217	5.90982	7.33429	7.08073	7.32867	7.33809	7.3877	7.07274	7.19525	7.3525	7.28797	7.20697
1.684	6.45714	6.62438	6.47825	6.22061	6.00205	6.04742	6.27449	6.58216	6.34864	6.51638	5.68741	3.37823	3.83227	2.8248	3.71817	5.7087	5.61196	5.90951	7.33386	7.08028	7.32825	7.33767	7.38728	7.07229	7.19479	7.35208	7.28755	7.20652
1.685	6.45679	6.62402	6.47792	6.2202	6.00156	6.04695	6.2741	6.58177	6.34822	6.51597	5.6875	3.37883	3.833	2.82534	3.71935	5.70859	5.61175	5.9092	7.33344	7.07983	7.32782	7.33725	7.38687	7.07183	7.19432	7.35165	7.28713	7.20607
1.686	6.45644	6.62365	6.47759	6.21979	6.00107	6.04648	6.27371	6.58137	6.3478	6.51555	5.68758	3.37942	3.83374	2.82588	3.72053	5.70848	5.61153	5.90889	7.33301	7.07938	7.3274	7.33683	7.38645	7.07137	7.19386	7.35123	7.28672	7.20562
1.687	6.45609	6.62328	6.47727	6.21938	6.00059	6.04601	6.27333	6.58097	6.34739	6.51514	5.68766	3.38002	3.83447	2.82642	3.72172	5.70836	5.61132	5.90859	7.33259	7.07893	7.32697	7.33642	7.38603	7.07091	7.1934	7.35081	7.2863	7.20517
1.688	6.45574	6.62291	6.47694	6.21896	6.0001	6.04554	6.27294	6.58058	6.34697	6.51472	5.68775	3.38062	3.83521	2.82696	3.7229	5.70825	5.61111	5.90828	7.33216	7.07848	7.32654	7.336	7.38561	7.07046	7.19294	7.35039	7.28588	7.20471
1.689	6.45538	6.62254	6.47661	6.21855	5.99961	6.04507	6.27255	6.58018	6.34656	6.51431	5.68782	3.38122	3.83594	2.8275	3.72408	5.70813	5.61089	5.90797	7.33174	7.07803	7.32612	7.33558	7.38519	7.07	7.19247	7.34997	7.28546	7.20426
1.69	6.45503	6.62217	6.47628	6.21814	5.99912	6.0446	6.27216	6.57979	6.34614	6.51389	5.6879	3.38181	3.83668	2.82804	3.72526	5.70801	5.61068	5.90766	7.33131	7.07758	7.32569	7.33516	7.38477	7.06954	7.19201	7.34954	7.28505	7.20381
1.691	6.45468	6.6218	6.47595	6.21772	5.99863	6.04413	6.27178	6.57939	6.34572	6.51348	5.68798	3.38241	3.83741	2.82858	3.72645	5.7079	5.61046	5.90735	7.33088	7.07713	7.32527	7.33474	7.38435	7.06908	7.19155	7.34912	7.28463	7.20336
1.692	6.45433	6.62143	6.47563	6.21731	5.99814	6.04365	6.27139	6.57899	6.34531	6.51306	5.68805	3.38301	3.83815	2.82911	3.72763	5.70778	5.61025	5.90704	7.33046	7.07668	7.32484	7.33432	7.38394	7.06863	7.19109	7.3487	7.28421	7.20291
1.693	6.45398	6.62107	6.4753	6.2169	5.99765	6.04318	6.271	6.5786	6.34489	6.51264	5.68813	3.3836	3.83888	2.82965	3.72881	5.70766	5.61003	5.90673	7.33003	7.07623	7.32441	7.33391	7.38352	7.06817	7.19062	7.34828	7.28379	7.20246
1.694	6.45362	6.6207	6.47497	6.21648	5.99715	6.04271	6.27061	6.5782	6.34447	6.51223	5.6882	3.3842	3.83961	2.83019	3.72999	5.70754	5.60982	5.90642	7.32961	7.07578	7.32399	7.33349	7.3831	7.06771	7.19016	7.34785	7.28337	7.20201
1.695	6.45327	6.62033	6.47464	6.21607	5.99666	6.04224	6.27022	6.5778	6.34406	6.51181	5.68827	3.3848	3.84035	2.83073	3.73117	5.70742	5.6096	5.90611	7.32918	7.07533	7.32356	7.33307	7.38268	7.06725	7.1897	7.34743	7.28296	7.20155
1.696	6.45292	6.61996	6.47431	6.21565	5.99617	6.04177	6.26983	6.5774	6.34364	6.51139	5.68834	3.3854	3.84108	2.83127	3.73236	5.70729	5.60938	5.90579	7.32875	7.07488	7.32313	7.33265	7.38226	7.0668	7.18923	7.34701	7.28254	7.2011
1.697	6.45257	6.61959	6.47398	6.21524	5.99568	6.04129	6.26944	6.57701	6.34322	6.51098	5.6884	3.38599	3.84182	2.83181	3.73354	5.70717	5.60916	5.90548	7.32833	7.07443	7.32271	7.33223	7.38184	7.06634	7.18877	7.34659	7.28212	7.20065
1.698	6.45221	6.61922	6.47365	6.21482	5.99519	6.04082	6.26906	6.57661	6.3428	6.51056	5.68847	3.38659	3.84255	2.83235	3.73472	5.70705	5.60894	5.90517	7.3279	7.07398	7.32228	7.33181	7.38142	7.06588	7.18831	7.34616	7.2817	7.2002
1.699	6.45186	6.61885	6.47332	6.21441	5.9947	6.04035	6.26867	6.57621	6.34239	6.51014	5.68853	3.38719	3.84328	2.83289	3.7359	5.70692	5.60872	5.90486	7.32747	7.07353	7.32185	7.33139	7.381	7.06542	7.18784	7.34574	7.28128	7.19975
1.7	6.45151	6.61848	6.47299	6.21399	5.9942	6.03987	6.26828	6.57581	6.34197	6.50973	5.6886	3.38778	3.84402	2.83343	3.73708	5.7068	5.6085	5.90455	7.32705	7.07308	7.32143	7.33097	7.38058	7.06496	7.18738	7.34532	7.28086	7.19929
1.701	6.45116	6.61811	6.47266	6.21358	5.99371	6.0394	6.26789	6.57542	6.34155	6.50931	5.68866	3.38838	3.84475	2.83397	3.73826	5.70667	5.60828	5.90423	7.32662	7.07263	7.321	7.33055	7.38016	7.0645	7.18692	7.34489	7.28045	7.19884
1.702	6.4508	6.61774	6.47233	6.21316	5.99322	6.03893	6.2675	6.57502	6.34113	6.50889	5.68872	3.38898	3.84548	2.83451	3.73945	5.70654	5.60806	5.90392	7.32619	7.07218	7.32057	7.33014	7.37974	7.06405	7.18645	7.34447	7.28003	7.19839
1.703	6.45045	6.61737	6.472	6.21275	5.99273	6.03845	6.26711	6.57462	6.34071	6.50847	5.68878	3.38958	3.84622	2.83505	3.74063	5.70642	5.60784	5.90361	7.32576	7.07173	7.32015	7.32972	7.37932	7.06359	7.18599	7.34405	7.27961	7.19794
1.704	6.4501	6.617	6.47167	6.21233	5.99223	6.03798	6.26672	6.57422	6.34029	6.50806	5.68883	3.39017	3.84695	2.83558	3.74181	5.70629	5.60762	5.90329	7.32534	7.07128	7.31972	7.3293	7.3789	7.06313	7.18552	7.34362	7.27919	7.19748
1.705	6.44974	6.61663	6.47134	6.21191	5.99174	6.0375	6.26633	6.57382	6.33988	6.50764	5.68889	3.39077	3.84768	2.83612	3.74299	5.70616	5.6074	5.90298	7.32491	7.07083	7.31929	7.32888	7.37848	7.06267	7.18506	7.3432	7.27877	7.19703
1.706	6.44939	6.61625	6.47101	6.2115	5.99125	6.03703	6.26594	6.57342	6.33946	6.50722	5.68894	3.39137	3.84842	2.83666	3.74417	5.70603	5.60717	5.90266	7.32448	7.07038	7.31887	7.32846	7.37806	7.06221	7.1846	7.34278	7.27835	7.19658
1.707	6.44903	6.61588	6.47068	6.21108	5.99075	6.03655	6.26554	6.57303	6.33904	6.5068	5.689	3.39196	3.84915	2.8372	3.74535	5.70589	5.60695	5.90235	7.32406	7.06992	7.31844	7.32804	7.37764	7.06175	7.18413	7.34235	7.27793	7.19612
1.708	6.44868	6.61551	6.47035	6.21066	5.99026	6.03608	6.26515	6.57263	6.33862	6.50638	5.68905	3.39256	3.84988	2.83774	3.74653	5.70576	5.60672	5.90203	7.32363	7.06947	7.31801	7.32762	7.37722	7.06129	7.18367	7.34193	7.27751	7.19567
1.709	6.44833	6.61514	6.47002	6.21025	5.98977	6.0356	6.26476	6.57223	6.3382	6.50597	5.6891	3.39316	3.85062	2.83828	3.74771	5.70563	5.6065	5.90172	7.3232	7.06902	7.31758	7.3272	7.3768	7.06083	7.1832	7.3415	7.27709	7.19522
1.71	6.44797	6.61477	6.46969	6.20983	5.98927	6.03512	6.26437	6.57183	6.33778	6.50555	5.68915	3.39375	3.85135	2.83882	3.74889	5.70549	5.60627	5.9014	7.32277	7.06857	7.31716	7.32678	7.37638	7.06037	7.18274	7.34108	7.27668	7.19477
1.711	6.44762	6.6144	6.46936	6.20941	5.98878	6.03465	6.26398	6.57143	6.33736	6.50513	5.6892	3.39435	3.85208	2.83936	3.75007	5.70536	5.60605	5.90109	7.32235	7.06812	7.31673	7.32636	7.37596	7.05991	7.18227	7.34066	7.27626	7.19431
1.712	6.44726	6.61403	6.46903	6.209	5.98828	6.03417	6.26359	6.57103	6.33694	6.50471	5.68924	3.39495	3.85282	2.8399	3.75125	5.70522	5.60582	5.90077	7.32192	7.06767	7.3163	7.32594	7.37554	7.05945	7.18181	7.34023	7.27584	7.19386
1.713	6.44691	6.61366	6.4687	6.20858	5.98779	6.0337	6.2632	6.57063	6.33652	6.50429	5.68929	3.39554	3.85355	2.84044	3.75243	5.70509	5.60559	5.90045	7.32149	7.06722	7.31587	7.32552	7.37512	7.05899	7.18134	7.33981	7.27542	7.19341
1.714	6.44655	6.61328	6.46837	6.20816	5.98729	6.03322	6.2628	6.57023	6.3361	6.50387	5.68933	3.39614	3.85428	2.84098	3.75361	5.70495	5.60537	5.90014	7.32106	7.06676	7.31544	7.3251	7.3747	7.05853	7.18088	7.33938	7.275	7.19295
1.715	6.4462	6.61291	6.46803	6.20774	5.9868	6.03274	6.26241	6.56983	6.33568	6.50345	5.68937	3.39674	3.85501	2.84151	3.75479	5.70481	5.60514	5.89982	7.32063	7.06631	7.31502	7.32468	7.37428	7.05807	7.18041	7.33896	7.27458	7.1925
1.716	6.44584	6.61254	6.4677	6.20733	5.9863	6.03226	6.26202	6.56943	6.33526	6.50303	5.68941	3.39733	3.85575	2.84205	3.75597	5.70467	5.60491	5.8995	7.32021	7.06586	7.31459	7.32426	7.37386	7.05761	7.17995	7.33854	7.27416	7.19204
1.717	6.44549	6.61217	6.46737	6.20691	5.98581	6.03179	6.26163	6.56903	6.33484	6.50261	5.68945	3.39793	3.85648	2.84259	3.75715	5.70453	5.60468	5.89918	7.31978	7.06541	7.31416	7.32384	7.37343	7.05715	7.17948	7.33811	7.27374	7.19159
1.718	6.44513	6.6118	6.46704	6.20649	5.98531	6.03131	6.26123	6.56863	6.33442	6.50219	5.68949	3.39853	3.85721	2.84313	3.75833	5.70439	5.60445	5.89886	7.31935	7.06496	7.31373	7.32342	7.37301	7.05669	7.17902	7.33769	7.27332	7.19114
1.719	6.44478	6.61142	6.46671	6.20607	5.98481	6.03083	6.26084	6.56823	6.33399	6.50177	5.68953	3.39912	3.85794	2.84367	3.75951	5.70425	5.60422	5.89855	7.31892	7.0645	7.3133	7.323	7.37259	7.05623	7.17855	7.33726	7.2729	7.19068
1.72	6.44442	6.61105	6.46637	6.20565	5.98432	6.03035	6.26045	6.56783	6.33357	6.50135	5.68956	3.39972	3.85868	2.84421	3.76069	5.70411	5.60399	5.89823	7.31849	7.06405	7.31287	7.32258	7.37217	7.05577	7.17809	7.33684	7.27248	7.19023
1.721	6.44406	6.61068	6.46604	6.20523	5.98382	6.02987	6.26005	6.56743	6.33315	6.50093	5.6896	3.40032	3.85941	2.84475	3.76187	5.70397	5.60376	5.89791	7.31806	7.0636	7.31245	7.32215	7.37175	7.05531	7.17762	7.33641	7.27206	7.18977
1.722	6.44371	6.6103	6.46571	6.20481	5.98332	6.0294	6.25966	6.56703	6.33273	6.50051	5.68963	3.40091	3.86014	2.84529	3.76305	5.70382	5.60353	5.89759	7.31763	7.06315	7.31202	7.32173	7.37133	7.05485	7.17716	7.33599	7.27164	7.18932
1.723	6.44335	6.60993	6.46538	6.20439	5.98283	6.02892	6.25927	6.56663	6.33231	6.50009	5.68966	3.40151	3.86087	2.84583	3.76423	5.70368	5.60329	5.89727	7.31721	7.06269	7.31159	7.32131	7.37091	7.05439	7.17669	7.33556	7.27122	7.18887
1.724	6.443	6.60956	6.46504	6.20397	5.98233	6.02844	6.25887	6.56623	6.33189	6.49967	5.68969	3.40211	3.8616	2.84637	3.76541	5.70353	5.60306	5.89695	7.31678	7.06224	7.31116	7.32089	7.37048	7.05393	7.17622	7.33514	7.2708	7.18841
1.725	6.44264	6.60919	6.46471	6.20355	5.98183	6.02796	6.25848	6.56583	6.33146	6.49925	5.68972	3.4027	3.86234	2.84691	3.76659	5.70339	5.60283	5.89663	7.31635	7.06179	7.31073	7.32047	7.37006	7.05347	7.17576	7.33471	7.27038	7.18796
1.726	6.44228	6.60881	6.46438	6.20313	5.98133	6.02748	6.25808	6.56543	6.33104	6.49883	5.68975	3.4033	3.86307	2.84744	3.76777	5.70324	5.60259	5.89631	7.31592	7.06133	7.3103	7.32005	7.36964	7.05301	7.17529	7.33429	7.26995	7.1875
1.727	6.44193	6.60844	6.46404	6.20271	5.98084	6.027	6.25769	6.56503	6.33062	6.49841	5.68977	3.4039	3.8638	2.84798	3.76895	5.70309	5.60236	5.89599	7.31549	7.06088	7.30987	7.31963	7.36922	7.05255	7.17483	7.33386	7.26953	7.18705
1.728	6.44157	6.60807	6.46371	6.20229	5.98034	6.02652	6.2573	6.56462	6.3302	6.49799	5.6898	3.40449	3.86453	2.84852	3.77013	5.70294	5.60212	5.89567	7.31506	7.06043	7.30944	7.31921	7.3688	7.05209	7.17436	7.33344	7.26911	7.18659
1.729	6.44121	6.60769	6.46338	6.20187	5.97984	6.02604	6.2569	6.56422	6.32977	6.49757	5.68982	3.40509	3.86526	2.84906	3.7713	5.7028	5.60189	5.89534	7.31463	7.05997	7.30901	7.31879	7.36838	7.05163	7.17389	7.33301	7.26869	7.18614
1.73	6.44086	6.60732	6.46304	6.20145	5.97934	6.02556	6.25651	6.56382	6.32935	6.49715	5.68984	3.40569	3.86599	2.8496	3.77248	5.70265	5.60165	5.89502	7.3142	7.05952	7.30858	7.31836	7.36795	7.05117	7.17343	7.33258	7.26827	7.18568
1.731	6.4405	6.60694	6.46271	6.20103	5.97884	6.02508	6.25611	6.56342	6.32893	6.49672	5.68986	3.40628	3.86673	2.85014	3.77366	5.70249	5.60142	5.8947	7.31377	7.05907	7.30816	7.31794	7.36753	7.0507	7.17296	7.33216	7.26785	7.18523
1.732	6.44014	6.60657	6.46238	6.20061	5.97834	6.0246	6.25572	6.56302	6.32851	6.4963	5.68988	3.40688	3.86746	2.85068	3.77484	5.70234	5.60118	5.89438	7.31334	7.05861	7.30773	7.31752	7.36711	7.05024	7.17249	7.33173	7.26743	7.18477
1.733	6.43978	6.6062	6.46204	6.20019	5.97784	6.02412	6.25532	6.56262	6.32808	6.49588	5.6899	3.40748	3.86819	2.85122	3.77602	5.70219	5.60094	5.89406	7.31291	7.05816	7.3073	7.3171	7.36669	7.04978	7.17203	7.33131	7.26701	7.18432
1.734	6.43943	6.60582	6.46171	6.19977	5.97735	6.02364	6.25492	6.56221	6.32766	6.49546	5.68992	3.40807	3.86892	2.85176	3.7772	5.70204	5.6007	5.89373	7.31248	7.05771	7.30687	7.31668	7.36626	7.04932	7.17156	7.33088	7.26659	7.18386
1.735	6.43907	6.60545	6.46137	6.19935	5.97685	6.02315	6.25453	6.56181	6.32724	6.49504	5.68993	3.40867	3.86965	2.8523	3.77837	5.70188	5.60046	5.89341	7.31205	7.05725	7.30644	7.31626	7.36584	7.04886	7.17109	7.33045	7.26616	7.18341
1.736	6.43871	6.60507	6.46104	6.19893	5.97635	6.02267	6.25413	6.56141	6.32681	6.49462	5.68995	3.40926	3.87038	2.85283	3.77955	5.70173	5.60023	5.89309	7.31162	7.0568	7.30601	7.31583	7.36542	7.0484	7.17063	7.33003	7.26574	7.18295
[truncated: 26,264 more rows]

## Sheet: FigS3_B
Time	viral RNA load	Uninfected cell ratio
[truncated: 28,001 more rows]

[truncated: 7 more sheets: FigS3_C, FigS3_D, FigS3_E(point), FigS3_E(line), FigS3_F, FigS3_G, FigS3_H]
