# Supplementary material for: Incomplete antiviral treatment may induce longer durations of viral shedding during SARS-CoV-2 infection
Source: Life Sci Alliance. 2021 Aug 3;4(10):e202101049. doi: 10.26508/lsa.202101049 (PMC8340032; doi:10.26508/lsa.202101049)
Supplement: Supplementary file 10 [file LSA-2021-01049_SdataFS4.xlsx]

## Sheet: FigS4_A(point)
Day	RM A(nose)	RM B(nose)	RM C(nose)	RM D(nose)	RM 7(nose)	RM8(nose)	RM 9(nose)	RM 10(nose)	RM 11(nose)	RM 12(nose)	RM A(throat)	RM D(throat)	RM 7(throat)	RM 8(throat)	RM 9(throat)	RM 10(throat)	RM 11(throat)	RM 12(throat)	RM A (green)	RM B (green)	RM C (green)	RM D (green)	RM7 (green)	RM8 (green)	RM9 (green)	RM10 (green)	RM11 (green)	RM12 (green)
0	0	0	0	0	0	0	0	0	0	0	0	0	0	0	0	0	0	0
1	7.08731	7.28211	6.82784	6.41735	6.32854	5.00322	6.20501	8.24323	6.15944	7.36075	5.36726	4.22213	4.75539	0	2.60529	5.77266	6.4662	8.56379	8.45484	7.1903	8.47158	8.38154	8.65365	6.87148	7.94392	8.31857	7.09849	8.01523
2					5.63984	7.11591	6.95236	7.26932	7.35853	7.72567			3.43359	3.33153	2.30639	6.57454	2.85745	4.44805
3	4.36519	6.95056	5.24216	4.45542	4.0225	5.84072	0	6.90447	5.46594	6.72455	0	0	3.82734	0	5.86791	3.49875	4.91024	6.39297	6.82431	5.5586	6.54926	6.20365	7.02051	5.79154	6.81815	7.16053	7.44818	6.92733
4					5.03227	4.7577	3.86166	6.11117	6.41862	6.30746			5.39472	4.60973	5.40351	5.81432	4.79371	6.07444
5	6.45668	5.16343	4.94702	3.23763	3.33721	1.58773	3.90835	2.89467	4.36701	5.18362	4.59516	0	4.02934	0	0	0	0	5.40237	5.72128	4.9321	5.9128	6.42225
6					1.98291	3.2437	4.17711	5.52945	3.91371	4.74489			5.40199	4.85145	3.52808	5.12354	5.27498	3.97632
7	4.02492	4.4805	3.60304	0	2.34414	0	4.82071	4.24074	0	2.14241	4.91799	4.51822	0	4.17506	2.94524	0	3.62356	0					5.07076	3.99831	3.5487	4.85826	5.00392	3.61616
10	2.9287	4.88026	4.43628	3.9207							3.18136	0
12	0	3.02649	3.7365	0							1.8161	5.46434
14	2.01536	0	1.69504	0							0	0
17	0	0	0	0							0	0
21	0	0	0	0							0	0

## Sheet: FigS4_A(line)
time	RM A(nose)	RM B(nose)	RM C(nose)	RM D(nose)	RM 7(nose)	RM8(nose)	RM 9(nose)	RM 10(nose)	RM 11(nose)	RM 12(nose)	RM A(throat)	RM D(throat)	RM 7(throat)	RM 8(throat)	RM 9(throat)	RM 10(throat)	RM 11(throat)	RM 12(throat)	RM A (green)	RM B (green)	RM C (green)	RM D (green)	RM7 (green)	RM8 (green)	RM9 (green)	RM10 (green)	RM11 (green)	RM12 (green)
0	3.31346	3.25566	3.24868	3.35402	3.43536	3.31238	3.32399	3.28887	3.28731	3.26761	3.4934	3.17038	3.22569	2.86961	3.04494	3.57743	3.47444	3.29741	3.32962	3.33816	3.33144	3.32721	3.33076	3.31169	3.33494	3.32125	3.28537	3.31774
0.001	3.35716	3.29957	3.29276	3.39686	3.47611	3.35303	3.36665	3.33241	3.32977	3.31064	3.49965	3.17558	3.23113	2.87381	3.05058	3.58604	3.48015	3.35578	3.38008	3.38776	3.38193	3.3778	3.38146	3.36124	3.38474	3.37183	3.33568	3.36764
0.002	3.40086	3.34348	3.33684	3.4397	3.51685	3.39368	3.4093	3.37594	3.37222	3.35367	3.50589	3.18078	3.23656	2.87801	3.05622	3.59466	3.48586	3.41414	3.43054	3.43736	3.43242	3.42838	3.43216	3.41079	3.43454	3.42242	3.38599	3.41754
0.003	3.44456	3.38739	3.38091	3.48254	3.5576	3.43432	3.45195	3.41947	3.41467	3.39669	3.51214	3.18598	3.242	2.8822	3.06187	3.60327	3.49156	3.4725	3.481	3.48697	3.48291	3.47897	3.48285	3.46033	3.48435	3.473	3.4363	3.46744
0.004	3.48825	3.43129	3.42499	3.52537	3.59834	3.47497	3.49461	3.463	3.45712	3.43972	3.51838	3.19118	3.24743	2.8864	3.06751	3.61187	3.49727	3.53086	3.53146	3.53657	3.53341	3.52956	3.53355	3.50988	3.53415	3.52358	3.48661	3.51733
0.005	3.53194	3.4752	3.46906	3.56821	3.63908	3.51561	3.53726	3.50653	3.49957	3.48274	3.52461	3.19638	3.25287	2.89059	3.07315	3.62047	3.50297	3.58921	3.58192	3.58617	3.5839	3.58015	3.58425	3.55943	3.58396	3.57416	3.53692	3.56723
0.006	3.57564	3.5191	3.51313	3.61104	3.67982	3.55625	3.57991	3.55005	3.54202	3.52576	3.53084	3.20157	3.2583	2.89479	3.07879	3.62907	3.50866	3.64756	3.63238	3.63577	3.63439	3.63074	3.63495	3.60898	3.63376	3.62474	3.58723	3.61713
0.007	3.61933	3.563	3.5572	3.65387	3.72055	3.59689	3.62255	3.59358	3.58446	3.56878	3.53707	3.20676	3.26373	2.89898	3.08443	3.63766	3.51435	3.7059	3.68284	3.68537	3.68488	3.68133	3.68564	3.65853	3.68356	3.67532	3.63754	3.66703
0.008	3.66301	3.6069	3.60127	3.6967	3.76128	3.63752	3.6652	3.6371	3.62691	3.6118	3.5433	3.21195	3.26915	2.90317	3.09006	3.64624	3.52004	3.76423	3.73329	3.73497	3.73537	3.73192	3.73634	3.70808	3.73337	3.7259	3.68785	3.71693
0.009	3.7067	3.65079	3.64534	3.73952	3.80201	3.67815	3.70784	3.68062	3.66935	3.65482	3.54952	3.21714	3.27458	2.90736	3.0957	3.65483	3.52573	3.82256	3.78375	3.78457	3.78586	3.7825	3.78704	3.75763	3.78317	3.77648	3.73816	3.76682
0.01	3.75038	3.69469	3.6894	3.78235	3.84273	3.71878	3.75047	3.72414	3.71178	3.69783	3.55573	3.22233	3.28	2.91155	3.10133	3.6634	3.53141	3.88088	3.83421	3.83417	3.83635	3.83309	3.83773	3.80717	3.83297	3.82706	3.78847	3.81672
0.011	3.79406	3.73858	3.73346	3.82516	3.88345	3.75941	3.79311	3.76765	3.75422	3.74084	3.56195	3.22752	3.28542	2.91574	3.10696	3.67197	3.53709	3.93918	3.88467	3.88377	3.88684	3.88368	3.88843	3.85672	3.88277	3.87764	3.83878	3.86662
0.012	3.83773	3.78247	3.77752	3.86798	3.92417	3.80004	3.83574	3.81116	3.79665	3.78385	3.56816	3.2327	3.29084	2.91993	3.1126	3.68054	3.54276	3.99748	3.93513	3.93337	3.93733	3.93426	3.93912	3.90627	3.93257	3.92822	3.88909	3.91651
0.013	3.8814	3.82635	3.82158	3.91079	3.96488	3.84066	3.87837	3.85467	3.83908	3.82685	3.57436	3.23788	3.29626	2.92412	3.11822	3.6891	3.54843	4.05576	3.98558	3.98296	3.98782	3.98485	3.98982	3.95581	3.98237	3.9788	3.9394	3.96641
0.014	3.92507	3.87023	3.86563	3.9536	4.00559	3.88127	3.92099	3.89817	3.8815	3.86985	3.58056	3.24306	3.30167	2.92831	3.12385	3.69765	3.5541	4.11402	4.03604	4.03256	4.03831	4.03543	4.04051	4.00536	4.03217	4.02938	3.9897	4.0163
0.015	3.96873	3.91411	3.90967	3.9964	4.04629	3.92189	3.96361	3.94167	3.92392	3.91285	3.58676	3.24824	3.30708	2.93249	3.12948	3.7062	3.55977	4.17226	4.08649	4.08216	4.0888	4.08602	4.0912	4.0549	4.08197	4.07996	4.04001	4.0662
0.016	4.01239	3.95798	3.95372	4.03919	4.08698	3.96249	4.00622	3.98516	3.96634	3.95584	3.59295	3.25342	3.31249	2.93668	3.13511	3.71475	3.56543	4.23049	4.13695	4.13175	4.13929	4.1366	4.14189	4.10445	4.13177	4.13053	4.09032	4.11609
0.017	4.05604	4.00185	3.99775	4.08198	4.12767	4.0031	4.04883	4.02865	4.00875	3.99883	3.59914	3.25859	3.3179	2.94086	3.14073	3.72329	3.57108	4.28869	4.1874	4.18135	4.18977	4.18719	4.19259	4.15399	4.18157	4.18111	4.14062	4.16598
0.018	4.09969	4.04571	4.04178	4.12476	4.16834	4.04369	4.09143	4.07213	4.05115	4.04181	3.60532	3.26377	3.32331	2.94505	3.14635	3.73182	3.57673	4.34686	4.23785	4.23094	4.24026	4.23777	4.24328	4.20353	4.23137	4.23168	4.19093	4.21588
0.019	4.14333	4.08957	4.08581	4.16754	4.20901	4.08428	4.13403	4.11561	4.09355	4.08479	3.6115	3.26894	3.32871	2.94923	3.15197	3.74035	3.58238	4.40501	4.2883	4.28053	4.29074	4.28835	4.29397	4.25307	4.28116	4.28226	4.24123	4.26577
0.02	4.18696	4.13342	4.12983	4.2103	4.24968	4.12487	4.17662	4.15908	4.13594	4.12775	3.61768	3.27411	3.33411	2.95341	3.15759	3.74887	3.58803	4.46312	4.33875	4.33013	4.34122	4.33893	4.34465	4.30261	4.33096	4.33283	4.29153	4.31566
0.021	4.23058	4.17726	4.17384	4.25306	4.29033	4.16544	4.21919	4.20254	4.17833	4.17071	3.62385	3.27927	3.33951	2.95759	3.16321	3.75738	3.59367	4.52118	4.3892	4.37972	4.39171	4.38951	4.39534	4.35215	4.38075	4.3834	4.34184	4.36555
0.022	4.27419	4.22109	4.21784	4.29581	4.33097	4.20601	4.26176	4.24599	4.2207	4.21367	3.63001	3.28444	3.34491	2.96177	3.16883	3.76589	3.5993	4.5792	4.43965	4.42931	4.44219	4.44008	4.44603	4.40169	4.43054	4.43397	4.39214	4.41543
0.023	4.31779	4.26491	4.26184	4.33854	4.37159	4.24657	4.30432	4.28943	4.26307	4.25661	3.63617	3.2896	3.35031	2.96595	3.17444	3.7744	3.60493	4.63717	4.4901	4.47889	4.49266	4.49066	4.49671	4.45123	4.48033	4.48454	4.44244	4.46532
0.024	4.36138	4.30873	4.30582	4.38127	4.41221	4.28712	4.34687	4.33286	4.30542	4.29955	3.64233	3.29476	3.3557	2.97013	3.18005	3.78289	3.61056	4.69508	4.54054	4.52848	4.54314	4.54123	4.54739	4.50076	4.53012	4.5351	4.49273	4.5152
0.025	4.40496	4.35253	4.34979	4.42398	4.45281	4.32766	4.38941	4.37628	4.34777	4.34247	3.64848	3.29992	3.36109	2.97431	3.18566	3.79138	3.61619	4.75293	4.59098	4.57806	4.59362	4.5918	4.59807	4.55029	4.5799	4.58567	4.54303	4.56508
0.026	4.44852	4.39632	4.39375	4.46667	4.49339	4.36818	4.43193	4.41969	4.3901	4.38538	3.65463	3.30508	3.36648	2.97848	3.19127	3.79986	3.6218	4.81069	4.64142	4.62764	4.64409	4.64237	4.64875	4.59982	4.62969	4.63623	4.59332	4.61496
0.027	4.49207	4.4401	4.4377	4.50935	4.53396	4.40869	4.47443	4.46308	4.43242	4.42828	3.66077	3.31024	3.37186	2.98266	3.19688	3.80834	3.62742	4.86837	4.69186	4.67722	4.69456	4.69294	4.69942	4.64935	4.67947	4.68679	4.64361	4.66484
0.028	4.5356	4.48386	4.48163	4.55201	4.5745	4.44919	4.51692	4.50645	4.47472	4.47116	3.6669	3.31539	3.37725	2.98683	3.20249	3.81681	3.63303	4.92594	4.74229	4.72679	4.74502	4.7435	4.75009	4.69888	4.72924	4.73735	4.6939	4.71472
0.029	4.57911	4.5276	4.52554	4.59465	4.61503	4.48967	4.55939	4.54981	4.51701	4.51402	3.67304	3.32054	3.38263	2.99101	3.20809	3.82527	3.63864	4.9834	4.79272	4.77637	4.79549	4.79406	4.80076	4.7484	4.77902	4.7879	4.74418	4.76459
0.03	4.6226	4.57133	4.56944	4.63726	4.65553	4.53014	4.60184	4.59314	4.55928	4.55687	3.67916	3.32569	3.388	2.99518	3.2137	3.83372	3.64424	5.04074	4.84315	4.82593	4.84594	4.84462	4.85142	4.79791	4.82879	4.83845	4.79447	4.81445
0.031	4.66607	4.61504	4.61331	4.67986	4.69601	4.57058	4.64427	4.63646	4.60153	4.5997	3.68528	3.33083	3.39338	2.99935	3.2193	3.84217	3.64983	5.09792	4.89357	4.8755	4.8964	4.89517	4.90208	4.84743	4.87856	4.88899	4.84474	4.86432
0.032	4.70951	4.65872	4.65716	4.72242	4.73645	4.61101	4.68668	4.67975	4.64375	4.64251	3.6914	3.33598	3.39875	3.00352	3.2249	3.85061	3.65543	5.15494	4.94399	4.92506	4.94685	4.94571	4.95274	4.89694	4.92832	4.93953	4.89502	4.91418
0.033	4.75293	4.70238	4.70099	4.76496	4.77687	4.65141	4.72905	4.72302	4.68596	4.68529	3.69751	3.34112	3.40412	3.00769	3.23049	3.85904	3.66101	5.21177	4.9944	4.97461	4.99729	4.99626	5.00339	4.94644	4.97807	4.99007	4.94529	4.96403
0.034	4.79631	4.74601	4.74479	4.80746	4.81725	4.69178	4.7714	4.76625	4.72813	4.72804	3.70361	3.34626	3.40949	3.01186	3.23609	3.86746	3.6666	5.26839	5.0448	5.02416	5.04773	5.04679	5.05403	4.99594	5.02782	5.0406	4.99555	5.01388
0.035	4.83966	4.78961	4.78856	4.84993	4.8576	4.73213	4.81371	4.80945	4.77028	4.77077	3.70971	3.3514	3.41486	3.01602	3.24168	3.87588	3.67217	5.32477	5.0952	5.0737	5.09816	5.09732	5.10466	5.04544	5.07757	5.09112	5.04581	5.06372
0.036	4.88297	4.83317	4.83229	4.89235	4.8979	4.77245	4.85599	4.85262	4.81239	4.81346	3.71581	3.35653	3.42022	3.02019	3.24728	3.88429	3.67775	5.38088	5.14559	5.12323	5.14858	5.14784	5.15529	5.09492	5.1273	5.14164	5.09606	5.11356
0.037	4.92623	4.8767	4.87599	4.93473	4.93816	4.81273	4.89822	4.89575	4.85446	4.85612	3.72189	3.36166	3.42558	3.02436	3.25287	3.89269	3.68331	5.43669	5.19597	5.17275	5.199	5.19835	5.20591	5.1444	5.17703	5.19214	5.1463	5.16338
0.038	4.96945	4.92019	4.91964	4.97707	4.97837	4.85298	4.94042	4.93883	4.8965	4.89874	3.72798	3.36679	3.43094	3.02852	3.25845	3.90108	3.68888	5.49216	5.24635	5.22227	5.2494	5.24885	5.25652	5.19387	5.22675	5.24264	5.19654	5.2132
0.039	5.01262	4.96363	4.96325	5.01935	5.01853	4.89319	4.98256	4.98187	4.93849	4.94131	3.73405	3.37192	3.43629	3.03268	3.26404	3.90946	3.69443	5.54725	5.29671	5.27177	5.2998	5.29935	5.30712	5.24333	5.27645	5.29313	5.24676	5.26301
0.04	5.05573	5.00702	5.00681	5.06157	5.05862	4.93335	5.02465	5.02485	4.98044	4.98384	3.74012	3.37705	3.44164	3.03684	3.26962	3.91783	3.69999	5.60192	5.34706	5.32127	5.35018	5.34983	5.3577	5.29278	5.32615	5.3436	5.29698	5.31281
0.041	5.09878	5.05036	5.05031	5.10373	5.09866	4.97346	5.06668	5.06777	5.02233	5.02631	3.74619	3.38217	3.44699	3.041	3.27521	3.9262	3.70553	5.65612	5.39739	5.37075	5.40055	5.40029	5.40827	5.34221	5.37583	5.39406	5.34718	5.36259
0.042	5.14176	5.09363	5.09375	5.14581	5.13862	5.01353	5.10865	5.11063	5.06417	5.06872	3.75225	3.38729	3.45234	3.04516	3.28079	3.93456	3.71108	5.7098	5.44771	5.42021	5.4509	5.45074	5.45883	5.39163	5.4255	5.44451	5.39737	5.41236
0.043	5.18467	5.13684	5.13712	5.18782	5.1785	5.05353	5.15054	5.15342	5.10594	5.11108	3.7583	3.39241	3.45768	3.04932	3.28636	3.9429	3.71661	5.76292	5.49801	5.46966	5.50123	5.50117	5.50937	5.44104	5.47515	5.49494	5.44754	5.46212
0.044	5.22749	5.17997	5.18042	5.22974	5.2183	5.09347	5.19236	5.19613	5.14764	5.15336	3.76435	3.39752	3.46302	3.05348	3.29194	3.95124	3.72214	5.81541	5.5483	5.51909	5.55155	5.55159	5.55989	5.49043	5.52478	5.54535	5.4977	5.51185
0.045	5.27022	5.22302	5.22363	5.27157	5.25801	5.13334	5.23409	5.23876	5.18926	5.19556	3.77039	3.40263	3.46835	3.05764	3.29751	3.95957	3.72767	5.86722	5.59856	5.5685	5.60184	5.60198	5.61038	5.5398	5.57439	5.59574	5.54784	5.56157
0.046	5.31284	5.26598	5.26675	5.31329	5.29761	5.17313	5.27572	5.28129	5.2308	5.23767	3.77642	3.40774	3.47369	3.06179	3.30309	3.96788	3.73319	5.91829	5.64879	5.61788	5.65211	5.65235	5.66085	5.58915	5.62398	5.6461	5.59795	5.61127
0.047	5.35536	5.30884	5.30977	5.3549	5.33711	5.21285	5.31726	5.32371	5.27224	5.2797	3.78245	3.41285	3.47902	3.06595	3.30866	3.97619	3.73871	5.96857	5.699	5.66724	5.70235	5.70269	5.7113	5.63848	5.67354	5.69644	5.64805	5.66094
0.048	5.39775	5.35159	5.35268	5.39638	5.37648	5.25247	5.35867	5.36602	5.31359	5.32162	3.78847	3.41796	3.48435	3.0701	3.31422	3.98449	3.74422	6.01799	5.74918	5.71657	5.75256	5.753	5.76171	5.68777	5.72307	5.74675	5.69811	5.71058
0.049	5.44001	5.39422	5.39546	5.43772	5.41572	5.29199	5.39996	5.4082	5.35482	5.36342	3.79448	3.42306	3.48967	3.07425	3.31979	3.99278	3.74972	6.0665	5.79933	5.76587	5.80274	5.80327	5.81208	5.73704	5.77257	5.79703	5.74815	5.76019
0.05	5.48211	5.43671	5.43811	5.47892	5.45482	5.3314	5.44112	5.45024	5.39592	5.4051	3.80049	3.42816	3.49499	3.0784	3.32535	4.00105	3.75522	6.11405	5.84943	5.81513	5.85287	5.85351	5.86242	5.78627	5.82203	5.84727	5.79815	5.80977
0.051	5.52406	5.47906	5.48062	5.51994	5.49376	5.37069	5.48212	5.49213	5.4369	5.44665	3.80649	3.43325	3.50031	3.08255	3.33091	4.00932	3.76071	6.16059	5.89949	5.86435	5.90297	5.9037	5.91271	5.83547	5.87145	5.89746	5.84812	5.85931
0.052	5.56582	5.52125	5.52295	5.56079	5.53252	5.40985	5.52296	5.53386	5.47772	5.48804	3.81248	3.43835	3.50563	3.0867	3.33647	4.01757	3.76619	6.20607	5.94951	5.91353	5.95301	5.95384	5.96296	5.88462	5.92082	5.94761	5.89804	5.90881
0.053	5.60739	5.56326	5.56511	5.60143	5.5711	5.44887	5.56361	5.57539	5.51838	5.52927	3.81847	3.44344	3.51094	3.09084	3.34203	4.02582	3.77167	6.25045	5.99947	5.96265	6.003	6.00394	6.01314	5.93373	5.97014	5.99771	5.94792	5.95825
0.054	5.64874	5.60508	5.60707	5.64186	5.60948	5.48774	5.60407	5.61673	5.55886	5.57032	3.82445	3.44852	3.51625	3.09499	3.34758	4.03405	3.77715	6.2937	6.04937	6.01172	6.05293	6.05397	6.06327	5.98278	6.01941	6.04775	5.99774	6.00764
0.055	5.68985	5.64668	5.64882	5.68206	5.64763	5.52644	5.64431	5.65785	5.59915	5.61116	3.83042	3.45361	3.52155	3.09913	3.35313	4.04227	3.78261	6.33577	6.0992	6.06072	6.10279	6.10393	6.11333	6.03177	6.06861	6.09772	6.0475	6.05698
0.056	5.73071	5.68805	5.69033	5.72199	5.68554	5.56495	5.68432	5.69872	5.63923	5.6518	3.83638	3.45869	3.52685	3.10328	3.35868	4.05048	3.78808	6.37664	6.14895	6.10965	6.15258	6.15381	6.1633	6.0807	6.11773	6.14762	6.0972	6.10624
0.057	5.77128	5.72916	5.73157	5.76164	5.72319	5.60326	5.72406	5.73933	5.67908	5.69219	3.84234	3.46377	3.53215	3.10742	3.36423	4.05868	3.79353	6.41628	6.19862	6.15851	6.20227	6.20362	6.2132	6.12956	6.16678	6.19743	6.14683	6.15543
0.058	5.81155	5.76999	5.77254	5.80098	5.76056	5.64136	5.76353	5.77965	5.71867	5.73233	3.84829	3.46884	3.53744	3.11156	3.36977	4.06686	3.79898	6.45466	6.2482	6.20727	6.25188	6.25332	6.26299	6.17833	6.21574	6.24715	6.19637	6.20453
0.059	5.85147	5.81052	5.81319	5.83999	5.79762	5.67922	5.80269	5.81965	5.75799	5.77219	3.85423	3.47392	3.54273	3.1157	3.37531	4.07504	3.80442	6.49176	6.29767	6.25594	6.30138	6.30292	6.31268	6.22701	6.2646	6.29677	6.24582	6.25354
0.06	5.89104	5.85072	5.85351	5.87863	5.83434	5.71682	5.84151	5.85931	5.797	5.81173	3.86017	3.47899	3.54802	3.11984	3.38085	4.0832	3.80986	6.52755	6.34702	6.3045	6.35076	6.3524	6.36224	6.27559	6.31335	6.34627	6.29516	6.30244
0.061	5.9302	5.89055	5.89345	5.91688	5.87071	5.75415	5.87998	5.8986	5.8357	5.85095	3.86609	3.48405	3.55331	3.12397	3.38639	4.09134	3.81529	6.56199	6.39624	6.35294	6.4	6.40175	6.41167	6.32406	6.36197	6.39565	6.3444	6.35123
0.062	5.96893	5.92999	5.933	5.9547	5.90669	5.79117	5.91805	5.93748	5.87403	5.88979	3.87201	3.48912	3.55859	3.12811	3.39192	4.09948	3.82071	6.59505	6.44532	6.40124	6.44911	6.45096	6.46095	6.3724	6.41046	6.44488	6.3935	6.39988
0.063	6.0072	5.969	5.97211	5.99206	5.94225	5.82787	5.9557	5.97592	5.91199	5.92825	3.87792	3.49418	3.56386	3.13224	3.39745	4.1076	3.82612	6.62671	6.49423	6.44939	6.49804	6.5	6.51007	6.4206	6.4588	6.49395	6.44246	6.44839
0.064	6.04496	6.00755	6.01075	6.02892	5.97736	5.86421	5.99289	6.01389	5.94953	5.96628	3.88383	3.49923	3.56913	3.13637	3.40298	4.11571	3.83153	6.65691	6.54296	6.49738	6.5468	6.54886	6.55899	6.46865	6.50696	6.54285	6.49126	6.49673
0.065	6.08218	6.04559	6.04888	6.06525	6.01198	5.90017	6.02959	6.05134	5.98662	6.00384	3.88972	3.50429	3.5744	3.14051	3.40851	4.1238	3.83693	6.68564	6.59149	6.54518	6.59535	6.59751	6.60772	6.51652	6.55494	6.59154	6.53989	6.5449
0.066	6.11881	6.0831	6.08645	6.10099	6.04609	5.93572	6.06575	6.08824	6.02322	6.04091	3.89561	3.50934	3.57967	3.14464	3.41403	4.13188	3.84233	6.71286	6.6398	6.59278	6.64368	6.64594	6.65621	6.5642	6.60271	6.64002	6.58831	6.59287
0.067	6.15481	6.12001	6.12344	6.13613	6.07965	5.97084	6.10134	6.12455	6.05931	6.07744	3.90149	3.51439	3.58493	3.14876	3.41955	4.13995	3.84771	6.73855	6.68786	6.64015	6.69176	6.69412	6.70445	6.61167	6.65025	6.68825	6.63652	6.64061
0.068	6.19014	6.15631	6.15978	6.1706	6.11262	6.00547	6.13632	6.16021	6.09484	6.11339	3.90736	3.51943	3.59019	3.15289	3.42507	4.148	3.85309	6.76269	6.73565	6.68727	6.73956	6.74203	6.7524	6.65891	6.69754	6.73622	6.68449	6.68811
0.069	6.22475	6.19193	6.19545	6.20437	6.14496	6.03961	6.17065	6.1952	6.12976	6.14872	3.91322	3.52447	3.59544	3.15702	3.43058	4.15603	3.85847	6.78528	6.78313	6.73412	6.78706	6.78963	6.80005	6.70589	6.74454	6.78388	6.73219	6.73534
0.07	6.25859	6.22683	6.23038	6.23739	6.17663	6.07319	6.20428	6.22945	6.16405	6.1834	3.91907	3.52951	3.60069	3.16114	3.43609	4.16405	3.86383	6.8063	6.83028	6.78066	6.83421	6.83689	6.84735	6.75258	6.79123	6.83121	6.77959	6.78226
0.071	6.29163	6.26097	6.26454	6.26962	6.2076	6.1062	6.23717	6.26293	6.19766	6.21737	3.92491	3.53454	3.60593	3.16526	3.4416	4.17206	3.86919	6.82579	6.87706	6.82686	6.881	6.88377	6.89427	6.79896	6.83759	6.87817	6.82666	6.82885
0.072	6.32381	6.2943	6.29787	6.30102	6.23783	6.1386	6.26928	6.29559	6.23054	6.25058	3.93075	3.53957	3.61117	3.16938	3.44711	4.18005	3.87454	6.84374	6.92343	6.87269	6.92738	6.93025	6.94077	6.84499	6.88356	6.92474	6.87337	6.87507
0.073	6.35508	6.32677	6.33033	6.33154	6.26727	6.17033	6.30056	6.32739	6.26265	6.28301	3.93657	3.5446	3.61641	3.1735	3.45261	4.18803	3.87988	6.86021	6.96935	6.91812	6.9733	6.97626	6.98681	6.89064	6.92912	6.97085	6.91968	6.92089
0.074	6.38541	6.35833	6.36188	6.36113	6.29589	6.20138	6.33096	6.35827	6.29395	6.31459	3.94239	3.54962	3.62164	3.17762	3.45811	4.19598	3.88522	6.87521	7.01478	6.9631	7.01873	7.02178	7.03234	6.93586	6.97423	7.01647	6.96554	6.96626
0.075	6.41474	6.38895	6.39246	6.38977	6.32365	6.23169	6.36046	6.3882	6.3244	6.3453	3.94819	3.55464	3.62687	3.18174	3.46361	4.20393	3.89055	6.8888	7.05966	7.00759	7.0636	7.06675	7.07731	6.98063	7.01883	7.06156	7.01092	7.01114
0.076	6.44305	6.41857	6.42204	6.4174	6.35052	6.26124	6.389	6.41713	6.35395	6.37507	3.95399	3.55965	3.6321	3.18585	3.4691	4.21185	3.89587	6.90103	7.10396	7.05155	7.10788	7.11112	7.12168	7.02489	7.06289	7.10606	7.05577	7.05549
0.077	6.47029	6.44716	6.45056	6.444	6.37646	6.28997	6.41656	6.44502	6.38256	6.40388	3.95978	3.56466	3.63731	3.18997	3.47459	4.21976	3.90118	6.91197	7.1476	7.09491	7.15151	7.15482	7.16537	7.06859	7.10635	7.1499	7.10003	7.09925
0.078	6.49643	6.47468	6.47801	6.46953	6.40144	6.31786	6.44308	6.47185	6.4102	6.43169	3.96555	3.56967	3.64253	3.19408	3.48008	4.22765	3.90648	6.92166	7.19053	7.13764	7.19442	7.19781	7.20834	7.11169	7.14917	7.19305	7.14365	7.14236
0.079	6.52145	6.50109	6.50433	6.49397	6.42543	6.34487	6.46855	6.49756	6.43684	6.45845	3.97132	3.57468	3.64774	3.19819	3.48556	4.23553	3.91178	6.93017	7.23269	7.17967	7.23656	7.24002	7.25052	7.15413	7.19127	7.23542	7.18658	7.18477
0.08	6.54531	6.52637	6.52951	6.51728	6.44841	6.37096	6.49294	6.52215	6.46242	6.48414	3.97708	3.57968	3.65295	3.2023	3.49105	4.24338	3.91706	6.93758	7.27402	7.22095	7.27785	7.28138	7.29184	7.19585	7.2326	7.27696	7.22874	7.22642
0.081	6.568	6.55048	6.55351	6.53946	6.47035	6.39611	6.51621	6.54558	6.48694	6.50873	3.98283	3.58467	3.65815	3.2064	3.49652	4.25122	3.92234	6.94395	7.31445	7.2614	7.31823	7.32182	7.33223	7.2368	7.2731	7.3176	7.27008	7.26725
0.082	6.58951	6.57342	6.57632	6.56048	6.49123	6.42027	6.53836	6.56783	6.51036	6.5322	3.98857	3.58966	3.66334	3.21051	3.502	4.25904	3.92761	6.94935	7.35389	7.30097	7.35764	7.36128	7.37162	7.2769	7.3127	7.35726	7.31053	7.30718
0.083	6.60982	6.59516	6.59794	6.58035	6.51105	6.44344	6.55936	6.5889	6.53267	6.55451	3.99429	3.59465	3.66854	3.21461	3.50747	4.26684	3.93287	6.95384	7.3923	7.33959	7.39598	7.39968	7.40994	7.31609	7.35134	7.39588	7.35002	7.34615
0.084	6.62895	6.6157	6.61834	6.59905	6.52979	6.46558	6.57921	6.60877	6.55384	6.57567	4.00001	3.59964	3.67372	3.21872	3.51294	4.27463	3.93813	6.95749	7.42959	7.37719	7.43321	7.43694	7.44711	7.35431	7.38894	7.43339	7.38847	7.38409
0.085	6.64689	6.63503	6.63753	6.61659	6.54745	6.48667	6.59791	6.62746	6.57388	6.59567	4.00572	3.60462	3.67891	3.22282	3.5184	4.28239	3.94337	6.96036	7.46569	7.41371	7.46924	7.473	7.48307	7.39148	7.42544	7.4697	7.42583	7.42094
0.086	6.66365	6.65317	6.65552	6.63298	6.56403	6.50671	6.61546	6.64496	6.59277	6.61449	4.01141	3.60959	3.68408	3.22692	3.52386	4.29013	3.9486	6.96251	7.50053	7.44907	7.50401	7.50779	7.51775	7.42754	7.46077	7.50476	7.46201	7.45661
0.087	6.67926	6.67012	6.67232	6.64824	6.57953	6.52568	6.63186	6.66128	6.61051	6.63215	4.0171	3.61456	3.68926	3.23101	3.52932	4.29786	3.95383	6.96399	7.53405	7.48321	7.53745	7.54125	7.55108	7.46243	7.49485	7.5385	7.49695	7.49105
0.088	6.69373	6.68589	6.68794	6.66238	6.59396	6.54357	6.64714	6.67645	6.62712	6.64865	4.02277	3.61953	3.69442	3.23511	3.53477	4.30556	3.95905	6.96487	7.56619	7.51606	7.5695	7.5733	7.583	7.49607	7.52764	7.57084	7.53059	7.52419
0.089	6.70709	6.70052	6.70242	6.67542	6.60734	6.56038	6.6613	6.69048	6.6426	6.66401	4.02844	3.62449	3.69959	3.2392	3.54022	4.31324	3.96426	6.96519	7.59688	7.54757	7.6001	7.6039	7.61345	7.52841	7.55907	7.60175	7.56286	7.55597
0.09	6.71937	6.71402	6.71578	6.68741	6.61968	6.57613	6.67438	6.7034	6.65697	6.67825	4.03409	3.62945	3.70475	3.24329	3.54567	4.3209	3.96945	6.965	7.62609	7.57769	7.6292	7.633	7.64239	7.55939	7.58908	7.63116	7.5937	7.58633
0.091	6.73062	6.72644	6.72805	6.69836	6.631	6.59081	6.68639	6.71525	6.67025	6.69138	4.03973	3.63441	3.7099	3.24738	3.55111	4.32854	3.97464	6.96434	7.65377	7.60636	7.65678	7.66056	7.66978	7.58895	7.61764	7.65904	7.62307	7.61523
0.092	6.74086	6.73779	6.73928	6.70831	6.64134	6.60443	6.69738	6.72606	6.68248	6.70345	4.04536	3.63936	3.71505	3.25147	3.55655	4.33616	3.97982	6.96325	7.67989	7.63355	7.68278	7.68654	7.69559	7.61706	7.6447	7.68535	7.65093	7.64262
0.093	6.75014	6.74814	6.74949	6.7173	6.65071	6.61703	6.70738	6.73587	6.69366	6.71448	4.05098	3.6443	3.72019	3.25556	3.56198	4.34376	3.98499	6.96177	7.70442	7.65922	7.70721	7.71093	7.71981	7.64368	7.67022	7.71007	7.67724	7.66848
0.094	6.75851	6.75751	6.75874	6.72538	6.65915	6.62861	6.71641	6.74472	6.70385	6.72451	4.05658	3.64924	3.72532	3.25964	3.56741	4.35133	3.99015	6.95993	7.72736	7.68335	7.73003	7.73372	7.74241	7.66877	7.6942	7.73319	7.70198	7.69278
0.095	6.766	6.76594	6.76707	6.73258	6.66669	6.63919	6.72453	6.75265	6.71308	6.73358	4.06218	3.65418	3.73046	3.26373	3.57284	4.35889	3.99531	6.95777	7.74871	7.70594	7.75126	7.75491	7.76342	7.69232	7.71662	7.75471	7.72513	7.71551
0.096	6.77266	6.7735	6.77453	6.73894	6.67337	6.64882	6.73178	6.75971	6.72138	6.74173	4.06776	3.65911	3.73558	3.26781	3.57826	4.36642	4.00045	6.95531	7.76847	7.72697	7.7709	7.77451	7.78283	7.71432	7.73747	7.77463	7.7467	7.73666
0.097	6.77854	6.78021	6.78115	6.74452	6.67922	6.65751	6.73819	6.76594	6.7288	6.74899	4.07333	3.66404	3.7407	3.27189	3.58368	4.37392	4.00558	6.95259	7.78666	7.74646	7.78898	7.79255	7.80068	7.73478	7.75678	7.79299	7.7667	7.75625
0.098	6.78369	6.78613	6.787	6.74934	6.68428	6.6653	6.7438	6.77139	6.73537	6.75542	4.07889	3.66896	3.74582	3.27597	3.5891	4.38141	4.0107	6.94962	7.80333	7.76442	7.80553	7.80905	7.81701	7.7537	7.77455	7.80981	7.78514	7.77429
0.099	6.78814	6.79131	6.79211	6.75346	6.68858	6.67222	6.74867	6.7761	6.74114	6.76105	4.08443	3.67388	3.75093	3.28004	3.59451	4.38886	4.01581	6.94642	7.8185	7.78088	7.82059	7.82406	7.83184	7.77111	7.79083	7.82512	7.80206	7.79082
0.1	6.79195	6.79578	6.79654	6.75692	6.69216	6.6783	6.75283	6.78012	6.74615	6.76593	4.08996	3.67879	3.75603	3.28412	3.59991	4.3963	4.02091	6.94302	7.83222	7.79587	7.83421	7.83764	7.84525	7.78703	7.80563	7.83899	7.81748	7.80587
0.101	6.79515	6.7996	6.80032	6.75975	6.69506	6.68359	6.75632	6.78348	6.75044	6.7701	4.09548	3.6837	3.76113	3.28819	3.60531	4.40371	4.026	6.93943	7.84456	7.80945	7.84645	7.84983	7.85727	7.8015	7.81902	7.85146	7.83147	7.81948
0.102	6.79778	6.8028	6.8035	6.762	6.69731	6.68812	6.75918	6.78624	6.75405	6.77361	4.10099	3.6886	3.76622	3.29226	3.61071	4.41109	4.03108	6.93568	7.85557	7.82165	7.85736	7.8607	7.86799	7.81458	7.83104	7.8626	7.84407	7.8317
0.103	6.79989	6.80543	6.80612	6.7637	6.69896	6.69193	6.76146	6.78843	6.75702	6.7765	4.10648	3.6935	3.77131	3.29633	3.61611	4.41845	4.03615	6.93177	7.86532	7.83254	7.86701	7.87031	7.87746	7.82631	7.84176	7.87246	7.85534	7.8426
0.104	6.80152	6.80753	6.80822	6.76489	6.70003	6.69505	6.76319	6.79009	6.7594	6.7788	4.11196	3.6984	3.77639	3.30039	3.6215	4.42578	4.0412	6.92772	7.87387	7.84217	7.87547	7.87874	7.88575	7.83675	7.85122	7.88113	7.86536	7.85224
0.105	6.80269	6.80913	6.80984	6.76561	6.70056	6.69752	6.76441	6.79126	6.76121	6.78055	4.11743	3.70328	3.78146	3.30446	3.62688	4.43309	4.04625	6.92354	7.88129	7.85062	7.88282	7.88606	7.89294	7.84596	7.85951	7.88867	7.87417	7.86068
0.106	6.80344	6.81028	6.81101	6.76589	6.70058	6.69938	6.76515	6.79197	6.7625	6.7818	4.12288	3.70817	3.78653	3.30852	3.63226	4.44037	4.05129	6.91924	7.88766	7.85794	7.88911	7.89233	7.89909	7.85401	7.86667	7.89515	7.88186	7.86799
0.107	6.8038	6.811	6.81178	6.76576	6.70012	6.70065	6.76545	6.79226	6.76331	6.78257	4.12832	3.71304	3.79159	3.31258	3.63764	4.44762	4.05631	6.91484	7.89305	7.8642	7.89443	7.89762	7.90429	7.86096	7.87279	7.90064	7.88849	7.87424
0.108	6.80381	6.81132	6.81216	6.76525	6.69922	6.70138	6.76533	6.79216	6.76365	6.7829	4.13375	3.71792	3.79665	3.31664	3.64301	4.45485	4.06132	6.91034	7.89751	7.86947	7.89884	7.90202	7.90858	7.86688	7.87793	7.90522	7.89414	7.87949
0.109	6.80348	6.81129	6.81218	6.76439	6.6979	6.7016	6.76483	6.79169	6.76358	6.78282	4.13916	3.72278	3.8017	3.32069	3.64838	4.46205	4.06633	6.90575	7.90113	7.87381	7.9024	7.90557	7.91206	7.87184	7.88216	7.90894	7.89886	7.88382
0.11	6.80285	6.81092	6.81189	6.7632	6.69618	6.70133	6.76397	6.79088	6.7631	6.78236	4.14456	3.72765	3.80674	3.32474	3.65374	4.46922	4.07132	6.90108	7.90397	7.87729	7.90518	7.90836	7.91477	7.8759	7.88553	7.91188	7.90274	7.88729
0.111	6.80194	6.81024	6.8113	6.7617	6.6941	6.70061	6.76279	6.78976	6.76227	6.78154	4.14994	3.7325	3.81178	3.3288	3.65909	4.47636	4.0763	6.89633	7.90608	7.87998	7.90725	7.91043	7.91678	7.87912	7.88812	7.91409	7.90583	7.88995
0.112	6.80077	6.80927	6.81043	6.75993	6.69167	6.69947	6.76129	6.78836	6.76109	6.7804	4.15531	3.73735	3.81681	3.33285	3.66445	4.48347	4.08126	6.89152	7.90752	7.88192	7.90866	7.91185	7.91814	7.88157	7.88998	7.91564	7.90819	7.89189
0.113	6.79936	6.80805	6.80931	6.7579	6.68893	6.69793	6.75951	6.78669	6.75959	6.77896	4.16067	3.7422	3.82183	3.33689	3.66979	4.49055	4.08622	6.88664	7.90836	7.88318	7.90946	7.91267	7.91892	7.8833	7.89117	7.91658	7.90988	7.89314
0.114	6.79773	6.80658	6.80795	6.75563	6.68588	6.69602	6.75747	6.78478	6.75781	6.77724	4.16601	3.74704	3.82685	3.34094	3.67514	4.49761	4.09116	6.88171	7.90864	7.88382	7.90971	7.91294	7.91916	7.88437	7.89174	7.91697	7.91097	7.89376
0.115	6.7959	6.80489	6.80639	6.75313	6.68256	6.69376	6.75519	6.78264	6.75575	6.77526	4.17133	3.75187	3.83186	3.34498	3.68047	4.50463	4.09609	6.87672	7.9084	7.88387	7.90946	7.91272	7.9189	7.88484	7.89175	7.91684	7.91149	7.89381
0.116	6.79388	6.803	6.80463	6.75044	6.67897	6.69118	6.75268	6.7803	6.75344	6.77304	4.17664	3.7567	3.83686	3.34902	3.68581	4.51162	4.10101	6.87168	7.9077	7.8834	7.90874	7.91203	7.9182	7.88475	7.89123	7.91625	7.9115	7.89334
0.117	6.79169	6.80091	6.80269	6.74755	6.67514	6.6883	6.74996	6.77776	6.7509	6.77061	4.18194	3.76152	3.84186	3.35306	3.69114	4.51858	4.10592	6.8666	7.90658	7.88244	7.9076	7.91093	7.91709	7.88414	7.89024	7.91523	7.91104	7.89238
0.118	6.78935	6.79866	6.80058	6.74448	6.67109	6.68513	6.74705	6.77505	6.74814	6.76796	4.18721	3.76634	3.84685	3.3571	3.69646	4.52551	4.11081	6.86148	7.90506	7.88103	7.90608	7.90946	7.91561	7.88307	7.88882	7.91383	7.91016	7.89098
0.119	6.78686	6.79625	6.79832	6.74126	6.66682	6.6817	6.74397	6.77217	6.74519	6.76513	4.19248	3.77115	3.85183	3.36113	3.70177	4.53241	4.11569	6.85632	7.9032	7.87922	7.90421	7.90764	7.91379	7.88157	7.88699	7.91208	7.90889	7.88918
0.12	6.78424	6.79369	6.79592	6.73789	6.66235	6.67802	6.74071	6.76914	6.74205	6.76213	4.19773	3.77595	3.8568	3.36516	3.70709	4.53928	4.12056	6.85112	7.90101	7.87703	7.90202	7.9055	7.91166	7.87967	7.8848	7.91	7.90726	7.88702
0.121	6.78149	6.79099	6.7934	6.73437	6.6577	6.67411	6.73731	6.76598	6.73874	6.75896	4.20296	3.78075	3.86177	3.36919	3.71239	4.54611	4.12542	6.84589	7.89853	7.87451	7.89954	7.90308	7.90926	7.87742	7.88228	7.90764	7.90531	7.88452
0.122	6.77864	6.78817	6.79075	6.73073	6.65288	6.66999	6.73377	6.76268	6.73527	6.75564	4.20817	3.78555	3.86673	3.37322	3.71769	4.55291	4.13026	6.84064	7.89579	7.87167	7.8968	7.90041	7.9066	7.87484	7.87946	7.90502	7.90307	7.88171
0.123	6.77568	6.78524	6.788	6.72697	6.6479	6.66567	6.73009	6.75927	6.73165	6.75219	4.21337	3.79033	3.87169	3.37724	3.72299	4.55968	4.13509	6.83535	7.8928	7.86855	7.89382	7.8975	7.90371	7.87196	7.87636	7.90215	7.90056	7.87862
0.124	6.77262	6.78221	6.78515	6.72311	6.64277	6.66116	6.72629	6.75575	6.7279	6.74861	4.21856	3.79511	3.87663	3.38127	3.72828	4.56641	4.13991	6.83004	7.8896	7.86518	7.89063	7.89437	7.90061	7.8688	7.87301	7.89907	7.89781	7.87528
0.125	6.76948	6.77907	6.78221	6.71914	6.63749	6.65648	6.72239	6.75213	6.72402	6.74491	4.22372	3.79989	3.88157	3.38529	3.73356	4.57311	4.14471	6.82471	7.88619	7.86156	7.88724	7.89105	7.89733	7.8654	7.86943	7.89579	7.89484	7.87171
0.126	6.76625	6.77585	6.77918	6.71507	6.63209	6.65164	6.71837	6.74842	6.72003	6.74111	4.22887	3.80465	3.8865	3.3893	3.73884	4.57977	4.1495	6.81935	7.88261	7.85773	7.88366	7.88756	7.89387	7.86177	7.86564	7.89233	7.89167	7.86792
0.127	6.76295	6.77255	6.77608	6.71092	6.62656	6.64664	6.71427	6.74462	6.71593	6.7372	4.234	3.80941	3.89143	3.39332	3.74412	4.5864	4.15428	6.81398	7.87886	7.85371	7.87993	7.8839	7.89025	7.85793	7.86166	7.88871	7.88832	7.86394
0.128	6.75958	6.76917	6.7729	6.70669	6.62092	6.64151	6.71007	6.74074	6.71173	6.7332	4.23912	3.81417	3.89634	3.39733	3.74938	4.593	4.15904	6.80859	7.87495	7.8495	7.87604	7.8801	7.88649	7.85391	7.8575	7.88493	7.88481	7.85979
0.129	6.75615	6.76572	6.76966	6.70238	6.61518	6.63624	6.70579	6.73679	6.70743	6.72911	4.24422	3.81892	3.90125	3.40134	3.75465	4.59955	4.16379	6.80317	7.87092	7.84513	7.87203	7.87617	7.88261	7.84971	7.85319	7.88103	7.88114	7.85548
0.13	6.75266	6.76221	6.76636	6.69801	6.60933	6.63084	6.70143	6.73277	6.70305	6.72495	4.2493	3.82366	3.90615	3.40535	3.7599	4.60607	4.16852	6.79775	7.86675	7.84061	7.86788	7.87211	7.8786	7.84535	7.84872	7.877	7.87734	7.85102
0.131	6.74912	6.75864	6.76301	6.69357	6.60339	6.62534	6.69701	6.72869	6.69859	6.72071	4.25436	3.82839	3.91104	3.40935	3.76515	4.61256	4.17324	6.79231	7.86248	7.83595	7.86363	7.86795	7.87449	7.84084	7.84413	7.87286	7.87342	7.84642
0.132	6.74553	6.75501	6.7596	6.68907	6.59736	6.61972	6.69251	6.72455	6.69406	6.7164	4.25941	3.83312	3.91593	3.41336	3.77039	4.61901	4.17795	6.78685	7.85809	7.83117	7.85927	7.86369	7.87028	7.83621	7.83941	7.86861	7.86938	7.84171
0.133	6.74189	6.75133	6.75615	6.68451	6.59125	6.614	6.68796	6.72035	6.68945	6.71202	4.26444	3.83784	3.9208	3.41736	3.77563	4.62542	4.18264	6.78138	7.85362	7.82627	7.85482	7.85933	7.86598	7.83145	7.83459	7.86428	7.86523	7.83688
0.134	6.7382	6.74761	6.75265	6.6799	6.58506	6.60819	6.68335	6.71611	6.68478	6.70759	4.26944	3.84256	3.92567	3.42135	3.78086	4.63179	4.18732	6.7759	7.84906	7.82126	7.85029	7.8549	7.8616	7.82659	7.82966	7.85986	7.861	7.83195
0.135	6.73448	6.74385	6.74911	6.67525	6.5788	6.60229	6.67868	6.71182	6.68006	6.70311	4.27443	3.84726	3.93053	3.42535	3.78609	4.63812	4.19198	6.77041	7.84442	7.81616	7.84568	7.85038	7.85715	7.82162	7.82463	7.85536	7.85667	7.82692
0.136	6.73072	6.74004	6.74554	6.67055	6.57247	6.5963	6.67397	6.70749	6.67527	6.69857	4.27941	3.85196	3.93538	3.42934	3.79131	4.64442	4.19663	6.7649	7.83971	7.81097	7.841	7.8458	7.85262	7.81656	7.81952	7.85079	7.85227	7.82181
0.137	6.72693	6.7362	6.74193	6.6658	6.56607	6.59024	6.66921	6.70311	6.67044	6.69398	4.28436	3.85666	3.94023	3.43333	3.79652	4.65067	4.20126	6.75939	7.83493	7.8057	7.83625	7.84116	7.84804	7.81141	7.81434	7.84616	7.8478	7.81662
0.138	6.72311	6.73232	6.73829	6.66102	6.55962	6.58411	6.66441	6.6987	6.66555	6.68935	4.28929	3.86134	3.94506	3.43732	3.80172	4.65689	4.20588	6.75387	7.83009	7.80035	7.83144	7.83645	7.8434	7.80619	7.80908	7.84147	7.84326	7.81136
0.139	6.71926	6.72841	6.73462	6.65621	6.55311	6.5779	6.65956	6.69426	6.66062	6.68468	4.29421	3.86602	3.94989	3.4413	3.80692	4.66306	4.21048	6.74834	7.8252	7.79494	7.82658	7.8317	7.83871	7.80089	7.80375	7.83672	7.83867	7.80603
0.14	6.71538	6.72447	6.73092	6.65135	6.54655	6.57163	6.65468	6.68978	6.65565	6.67997	4.29911	3.87069	3.9547	3.44528	3.81211	4.6692	4.21507	6.7428	7.82025	7.78946	7.82167	7.82689	7.83397	7.79553	7.79837	7.83193	7.83402	7.80064
0.141	6.71147	6.72051	6.7272	6.64647	6.53993	6.5653	6.64977	6.68528	6.65064	6.67523	4.30398	3.87536	3.95951	3.44926	3.8173	4.67529	4.21964	6.73726	7.81526	7.78393	7.81671	7.82204	7.82919	7.79011	7.79292	7.82708	7.82931	7.7952
0.142	6.70755	6.71652	6.72345	6.64156	6.53327	6.55892	6.64482	6.68074	6.64559	6.67045	4.30884	3.88001	3.96431	3.45324	3.82248	4.68134	4.22419	6.73171	7.81023	7.77834	7.81171	7.81715	7.82437	7.78463	7.78743	7.8222	7.82457	7.7897
0.143	6.7036	6.71251	6.71969	6.63662	6.52657	6.55248	6.63985	6.67618	6.64051	6.66564	4.31368	3.88466	3.9691	3.45721	3.82765	4.68735	4.22873	6.72615	7.80516	7.7727	7.80667	7.81222	7.81951	7.7791	7.78189	7.81728	7.81978	7.78416
0.144	6.69963	6.70847	6.7159	6.63166	6.51982	6.54599	6.63484	6.6716	6.6354	6.6608	4.31849	3.8893	3.97388	3.46118	3.83281	4.69332	4.23325	6.72058	7.80005	7.76702	7.8016	7.80726	7.81462	7.77352	7.7763	7.81233	7.81495	7.77857
0.145	6.69564	6.70441	6.71209	6.62667	6.51303	6.53945	6.62981	6.66699	6.63025	6.65594	4.32329	3.89394	3.97865	3.46515	3.83797	4.69925	4.23776	6.71501	7.79491	7.76129	7.79649	7.80227	7.8097	7.7679	7.77068	7.80734	7.81009	7.77294
0.146	6.69164	6.70034	6.70827	6.62165	6.50621	6.53287	6.62475	6.66236	6.62508	6.65105	4.32807	3.89856	3.98341	3.46911	3.84312	4.70513	4.24225	6.70943	7.78974	7.75553	7.79136	7.79725	7.80475	7.76224	7.76502	7.80232	7.80519	7.76727
0.147	6.68762	6.69625	6.70443	6.61662	6.49935	6.52625	6.61967	6.65772	6.61988	6.64613	4.33282	3.90318	3.98817	3.47307	3.84827	4.71097	4.24673	6.70385	7.78454	7.74973	7.78619	7.7922	7.79978	7.75654	7.75932	7.79728	7.80026	7.76157
0.148	6.68358	6.69214	6.70058	6.61157	6.49246	6.51958	6.61457	6.65305	6.61466	6.6412	4.33756	3.90779	3.99291	3.47703	3.8534	4.71677	4.25119	6.69827	7.77931	7.74389	7.781	7.78712	7.79478	7.7508	7.75359	7.79221	7.79531	7.75584
0.149	6.67953	6.68802	6.69671	6.6065	6.48553	6.51288	6.60944	6.64837	6.60942	6.63624	4.34227	3.91239	3.99764	3.48099	3.85853	4.72252	4.25563	6.69268	7.77406	7.73803	7.77579	7.78202	7.78975	7.74504	7.74783	7.78712	7.79033	7.75008
0.15	6.67547	6.68388	6.69283	6.60141	6.47858	6.50615	6.6043	6.64367	6.60415	6.63126	4.34697	3.91699	4.00237	3.48494	3.86365	4.72823	4.26005	6.68708	7.76879	7.73214	7.77055	7.77691	7.78471	7.73924	7.74204	7.782	7.78533	7.74429
0.151	6.6714	6.67973	6.68894	6.5963	6.4716	6.49938	6.59914	6.63896	6.59886	6.62627	4.35164	3.92157	4.00708	3.48889	3.86877	4.73389	4.26446	6.68148	7.7635	7.72622	7.7653	7.77177	7.77965	7.73342	7.73623	7.77687	7.7803	7.73848
0.152	6.66731	6.67557	6.68503	6.59118	6.46459	6.49257	6.59396	6.63423	6.59355	6.62126	4.35629	3.92615	4.01178	3.49283	3.87387	4.73951	4.26885	6.67588	7.75818	7.72027	7.76003	7.76661	7.77457	7.72757	7.7304	7.77172	7.77526	7.73264
0.153	6.66321	6.67139	6.68112	6.58605	6.45756	6.48574	6.58877	6.62949	6.58823	6.61623	4.36092	3.93072	4.01648	3.49678	3.87897	4.74508	4.27322	6.67027	7.75285	7.71431	7.75474	7.76144	7.76948	7.7217	7.72454	7.76655	7.7702	7.72678
0.154	6.65911	6.66721	6.6772	6.5809	6.4505	6.47888	6.58356	6.62474	6.58289	6.61118	4.36553	3.93528	4.02116	3.50072	3.88406	4.75061	4.27758	6.66467	7.74751	7.70832	7.74943	7.75625	7.76437	7.71581	7.71867	7.76136	7.76512	7.7209
0.155	6.65499	6.66301	6.67326	6.57574	6.44342	6.472	6.57834	6.61997	6.57753	6.60613	4.37011	3.93983	4.02584	3.50465	3.88915	4.75609	4.28192	6.65905	7.74215	7.70231	7.74411	7.75105	7.75925	7.70989	7.71277	7.75616	7.76002	7.715
0.156	6.65087	6.65881	6.66932	6.57057	6.43631	6.46508	6.5731	6.6152	6.57216	6.60106	4.37467	3.94437	4.0305	3.50859	3.89422	4.76152	4.28624	6.65344	7.73677	7.69628	7.73877	7.74584	7.75411	7.70396	7.70686	7.75095	7.75491	7.70909
0.157	6.64673	6.6546	6.66537	6.56538	6.42919	6.45815	6.56786	6.61041	6.56677	6.59598	4.37921	3.94891	4.03515	3.51252	3.89929	4.76691	4.29054	6.64782	7.73139	7.69024	7.73342	7.74061	7.74896	7.69801	7.70093	7.74573	7.74979	7.70315
0.158	6.64259	6.65037	6.66142	6.56019	6.42205	6.45119	6.5626	6.60562	6.56137	6.59088	4.38373	3.95344	4.0398	3.51645	3.90435	4.77224	4.29483	6.6422	7.72599	7.68418	7.72806	7.73537	7.7438	7.69204	7.69498	7.74049	7.74465	7.69721
0.159	6.63845	6.64615	6.65745	6.55498	6.41488	6.44421	6.55733	6.60082	6.55596	6.58578	4.38823	3.95795	4.04443	3.52037	3.9094	4.77754	4.29909	6.63657	7.72058	7.67811	7.72269	7.73012	7.73863	7.68605	7.68902	7.73524	7.7395	7.69124
0.16	6.63429	6.64191	6.65348	6.54977	6.40771	6.4372	6.55204	6.596	6.55053	6.58066	4.3927	3.96246	4.04905	3.52429	3.91444	4.78278	4.30334	6.63095	7.71516	7.67202	7.71731	7.72486	7.73346	7.68006	7.68305	7.72999	7.73434	7.68527
0.161	6.63013	6.63767	6.64951	6.54454	6.40051	6.43018	6.54675	6.59118	6.5451	6.57553	4.39715	3.96696	4.05366	3.52821	3.91947	4.78797	4.30757	6.62532	7.70973	7.66592	7.71192	7.71959	7.72827	7.67405	7.67706	7.72472	7.72918	7.67928
0.162	6.62597	6.63342	6.64553	6.53931	6.3933	6.42314	6.54145	6.58636	6.53965	6.5704	4.40157	3.97145	4.05826	3.53212	3.9245	4.79312	4.31178	6.61969	7.70429	7.6598	7.70652	7.71432	7.72307	7.66802	7.67107	7.71944	7.724	7.67328
0.163	6.6218	6.62916	6.64154	6.53407	6.38607	6.41609	6.53614	6.58152	6.53419	6.56526	4.40598	3.97593	4.06285	3.53604	3.92951	4.79822	4.31598	6.61406	7.69884	7.65368	7.70111	7.70903	7.71787	7.66199	7.66506	7.71416	7.71881	7.66727
0.164	6.61762	6.6249	6.63755	6.52882	6.37883	6.40901	6.53083	6.57668	6.52873	6.5601	4.41035	3.9804	4.06743	3.53994	3.93452	4.80327	4.32015	6.60842	7.69338	7.64754	7.6957	7.70374	7.71266	7.65594	7.65904	7.70887	7.71362	7.66125
0.165	6.61344	6.62063	6.63355	6.52357	6.37157	6.40192	6.5255	6.57183	6.52325	6.55494	4.41471	3.98486	4.07199	3.54385	3.93952	4.80827	4.32431	6.60279	7.68792	7.6414	7.69028	7.69844	7.70744	7.64988	7.65302	7.70357	7.70841	7.65522
0.166	6.60925	6.61636	6.62955	6.5183	6.3643	6.39482	6.52017	6.56698	6.51777	6.54978	4.41904	3.98932	4.07655	3.54775	3.94451	4.81322	4.32844	6.59715	7.68245	7.63524	7.68485	7.69314	7.70222	7.64382	7.64698	7.69827	7.7032	7.64919
0.167	6.60506	6.61209	6.62555	6.51304	6.35702	6.3877	6.51483	6.56212	6.51228	6.5446	4.42335	3.99376	4.08109	3.55165	3.94949	4.81811	4.33256	6.59151	7.67697	7.62908	7.67941	7.68782	7.69699	7.63774	7.64094	7.69296	7.69799	7.64314
0.168	6.60087	6.60781	6.62154	6.50776	6.34973	6.38056	6.50948	6.55725	6.50678	6.53942	4.42763	3.99819	4.08563	3.55554	3.95446	4.82296	4.33666	6.58587	7.67149	7.6229	7.67397	7.68251	7.69176	7.63166	7.63488	7.68764	7.69276	7.63709
0.169	6.59667	6.60352	6.61752	6.50248	6.34242	6.37341	6.50413	6.55238	6.50127	6.53423	4.43188	4.00262	4.09015	3.55943	3.95943	4.82776	4.34073	6.58023	7.666	7.61672	7.66852	7.67718	7.68652	7.62557	7.62882	7.68232	7.68754	7.63102
0.17	6.59247	6.59924	6.61351	6.4972	6.3351	6.36625	6.49877	6.54751	6.49576	6.52904	4.43612	4.00703	4.09466	3.56332	3.96438	4.83251	4.34479	6.57458	7.6605	7.61054	7.66307	7.67186	7.68127	7.61947	7.62276	7.67699	7.6823	7.62496
0.171	6.58826	6.59494	6.60949	6.49191	6.32778	6.35908	6.4934	6.54263	6.49024	6.52384	4.44032	4.01144	4.09915	3.5672	3.96933	4.83721	4.34883	6.56894	7.65501	7.60434	7.65761	7.66652	7.67602	7.61336	7.61668	7.67166	7.67706	7.61888
0.172	6.58405	6.59065	6.60547	6.48661	6.32044	6.3519	6.48803	6.53775	6.48472	6.51864	4.44451	4.01583	4.10364	3.57108	3.97426	4.84185	4.35285	6.56329	7.6495	7.59814	7.65215	7.66119	7.67077	7.60725	7.6106	7.66633	7.67182	7.6128
0.173	6.57984	6.58635	6.60144	6.48131	6.31309	6.3447	6.48266	6.53286	6.47919	6.51343	4.44866	4.02022	4.10811	3.57495	3.97919	4.84644	4.35685	6.55764	7.64399	7.59193	7.64668	7.65585	7.66551	7.60113	7.60452	7.66099	7.66657	7.60671
0.174	6.57563	6.58205	6.59742	6.476	6.30573	6.3375	6.47728	6.52797	6.47365	6.50822	4.45279	4.02459	4.11257	3.57883	3.9841	4.85099	4.36082	6.55199	7.63848	7.58572	7.64121	7.6505	7.66025	7.595	7.59843	7.65564	7.66132	7.60062
0.175	6.57141	6.57774	6.59339	6.4707	6.29837	6.33028	6.47189	6.52307	6.46811	6.503	4.4569	4.02895	4.11702	3.5827	3.98901	4.85547	4.36478	6.54634	7.63297	7.5795	7.63574	7.64516	7.65499	7.58887	7.59233	7.6503	7.65606	7.59452
0.176	6.56719	6.57344	6.58935	6.46538	6.29099	6.32306	6.4665	6.51818	6.46256	6.49778	4.46098	4.03331	4.12146	3.58656	3.9939	4.85991	4.36872	6.54069	7.62745	7.57328	7.63026	7.6398	7.64972	7.58273	7.58623	7.64495	7.6508	7.58842
0.177	6.56297	6.56913	6.58532	6.46007	6.28361	6.31582	6.46111	6.51328	6.45701	6.49255	4.46503	4.03765	4.12588	3.59042	3.99879	4.8643	4.37263	6.53504	7.62192	7.56705	7.62478	7.63445	7.64445	7.57659	7.58013	7.63959	7.64554	7.58231
0.178	6.55875	6.56481	6.58128	6.45475	6.27622	6.30858	6.45571	6.50837	6.45145	6.48732	4.46906	4.04198	4.13029	3.59428	4.00367	4.86863	4.37653	6.52939	7.6164	7.56082	7.61929	7.62909	7.63918	7.57045	7.57402	7.63424	7.64027	7.5762
0.179	6.55452	6.5605	6.57724	6.44942	6.26883	6.30133	6.45031	6.50346	6.44589	6.48209	4.47306	4.0463	4.13469	3.59813	4.00853	4.87291	4.3804	6.52373	7.61087	7.55458	7.61381	7.62373	7.6339	7.5643	7.5679	7.62888	7.635	7.57009
0.18	6.55029	6.55618	6.5732	6.44409	6.26142	6.29407	6.4449	6.49855	6.44032	6.47685	4.47704	4.05061	4.13907	3.60198	4.01339	4.87713	4.38425	6.51808	7.60533	7.54834	7.60832	7.61837	7.62862	7.55814	7.56179	7.62351	7.62973	7.56397
0.181	6.54606	6.55186	6.56916	6.43876	6.25401	6.2868	6.43949	6.49364	6.43476	6.47161	4.48099	4.05492	4.14345	3.60583	4.01823	4.88131	4.38809	6.51242	7.5998	7.54209	7.60282	7.613	7.62334	7.55198	7.55566	7.61815	7.62446	7.55785
0.182	6.54183	6.54754	6.56512	6.43343	6.24659	6.27953	6.43408	6.48873	6.42918	6.46636	4.48491	4.0592	4.14781	3.60967	4.02307	4.88543	4.3919	6.50676	7.59426	7.53584	7.59733	7.60764	7.61806	7.54582	7.54954	7.61278	7.61918	7.55172
0.183	6.5376	6.54322	6.56107	6.42809	6.23917	6.27225	6.42867	6.48381	6.42361	6.46111	4.4888	4.06348	4.15215	3.6135	4.02789	4.88949	4.39568	6.50111	7.58872	7.52959	7.59183	7.60226	7.61278	7.53966	7.54341	7.60741	7.6139	7.54559
0.184	6.53336	6.5389	6.55702	6.42275	6.23173	6.26496	6.42325	6.47889	6.41803	6.45586	4.49267	4.06775	4.15649	3.61734	4.03271	4.89351	4.39945	6.49545	7.58318	7.52333	7.58633	7.59689	7.60749	7.53349	7.53728	7.60204	7.60862	7.53946
0.185	6.52912	6.53457	6.55297	6.41741	6.2243	6.25766	6.41783	6.47397	6.41244	6.45061	4.49651	4.07201	4.1608	3.62117	4.03751	4.89747	4.4032	6.48979	7.57763	7.51707	7.58083	7.59152	7.6022	7.52731	7.53115	7.59667	7.60333	7.53332
0.186	6.52488	6.53024	6.54892	6.41207	6.21686	6.25036	6.4124	6.46904	6.40686	6.44536	4.50032	4.07625	4.16511	3.62499	4.0423	4.90137	4.40692	6.48413	7.57209	7.51081	7.57532	7.58614	7.59691	7.52114	7.52501	7.59129	7.59805	7.52718
0.187	6.52064	6.52591	6.54487	6.40672	6.20941	6.24305	6.40698	6.46412	6.40127	6.4401	4.50411	4.08048	4.1694	3.62881	4.04708	4.90522	4.41062	6.47847	7.56654	7.50455	7.56982	7.58076	7.59162	7.51496	7.51887	7.58591	7.59276	7.52104
0.188	6.5164	6.52158	6.54082	6.40137	6.20195	6.23574	6.40155	6.45919	6.39567	6.43484	4.50786	4.08471	4.17368	3.63263	4.05185	4.90902	4.4143	6.47281	7.56099	7.49828	7.56431	7.57538	7.58632	7.50878	7.51273	7.58053	7.58747	7.5149
0.189	6.51216	6.51725	6.53677	6.39602	6.1945	6.22842	6.39612	6.45426	6.39008	6.42957	4.51159	4.08892	4.17795	3.63644	4.05661	4.91276	4.41796	6.46715	7.55544	7.49201	7.5588	7.57	7.58103	7.5026	7.50658	7.57515	7.58218	7.50875
0.19	6.50792	6.51292	6.53271	6.39067	6.18703	6.22109	6.39068	6.44933	6.38448	6.42431	4.51529	4.09311	4.1822	3.64025	4.06136	4.91645	4.42159	6.46148	7.54988	7.48573	7.55329	7.56462	7.57573	7.49641	7.50044	7.56977	7.57688	7.50261
0.191	6.50367	6.50858	6.52866	6.38531	6.17956	6.21376	6.38525	6.44439	6.37888	6.41904	4.51896	4.0973	4.18643	3.64406	4.06609	4.92009	4.4252	6.45582	7.54433	7.47946	7.54778	7.55924	7.57043	7.49022	7.49429	7.56439	7.57159	7.49646
0.192	6.49943	6.50425	6.5246	6.37996	6.17209	6.20643	6.37981	6.43946	6.37328	6.41377	4.52261	4.10147	4.19065	3.64786	4.07082	4.92367	4.42879	6.45016	7.53877	7.47318	7.54226	7.55385	7.56513	7.48403	7.48813	7.559	7.56629	7.4903
0.193	6.49518	6.49991	6.52054	6.3746	6.16461	6.19909	6.37437	6.43452	6.36767	6.4085	4.52622	4.10564	4.19486	3.65165	4.07553	4.9272	4.43236	6.4445	7.53321	7.4669	7.53675	7.54846	7.55983	7.47784	7.48198	7.55361	7.56099	7.48415
0.194	6.49093	6.49557	6.51648	6.36924	6.15713	6.19174	6.36893	6.42959	6.36207	6.40323	4.52981	4.10979	4.19906	3.65544	4.08023	4.93067	4.4359	6.43883	7.52765	7.46062	7.53123	7.54308	7.55453	7.47164	7.47583	7.54823	7.5557	7.47799
0.195	6.48668	6.49123	6.51242	6.36387	6.14965	6.18439	6.36348	6.42465	6.35646	6.39795	4.53337	4.11393	4.20323	3.65923	4.08492	4.93409	4.43942	6.43317	7.52209	7.45434	7.52571	7.53769	7.54922	7.46545	7.46967	7.54284	7.55039	7.47183
0.196	6.48243	6.48689	6.50836	6.35851	6.14216	6.17704	6.35804	6.41971	6.35085	6.39268	4.5369	4.11805	4.2074	3.66301	4.0896	4.93745	4.44291	6.4275	7.51653	7.44805	7.52019	7.5323	7.54392	7.45925	7.46351	7.53745	7.54509	7.46568
0.197	6.47818	6.48255	6.5043	6.35314	6.13466	6.16968	6.35259	6.41477	6.34523	6.3874	4.5404	4.12217	4.21155	3.66679	4.09426	4.94076	4.44639	6.42184	7.51097	7.44176	7.51467	7.52691	7.53862	7.45305	7.45735	7.53206	7.53979	7.45951
0.198	6.47393	6.47821	6.50024	6.34778	6.12717	6.16232	6.34714	6.40982	6.33962	6.38212	4.54387	4.12627	4.21568	3.67057	4.09891	4.94402	4.44984	6.41617	7.5054	7.43547	7.50915	7.52151	7.53331	7.44684	7.45119	7.52666	7.53449	7.45335
0.199	6.46968	6.47387	6.49618	6.34241	6.11967	6.15495	6.34169	6.40488	6.334	6.37684	4.54731	4.13035	4.2198	3.67433	4.10355	4.94722	4.45326	6.4105	7.49984	7.42918	7.50363	7.51612	7.528	7.44064	7.44502	7.52127	7.52918	7.44719
0.2	6.46543	6.46953	6.49211	6.33704	6.11216	6.14758	6.33624	6.39993	6.32838	6.37156	4.55072	4.13443	4.2239	3.6781	4.10818	4.95036	4.45666	6.40484	7.49427	7.42289	7.4981	7.51073	7.52269	7.43444	7.43886	7.51588	7.52388	7.44102
0.201	6.46117	6.46518	6.48805	6.33167	6.10466	6.14021	6.33078	6.39499	6.32276	6.36627	4.5541	4.13849	4.22799	3.68186	4.1128	4.95345	4.46004	6.39917	7.4887	7.4166	7.49258	7.50533	7.51738	7.42823	7.43269	7.51048	7.51857	7.43485
0.202	6.45692	6.46084	6.48399	6.32629	6.09715	6.13283	6.32533	6.39004	6.31714	6.36099	4.55745	4.14254	4.23207	3.68561	4.1174	4.95649	4.46339	6.3935	7.48313	7.4103	7.48706	7.49994	7.51208	7.42202	7.42653	7.50509	7.51326	7.42869
0.203	6.45266	6.45649	6.47992	6.32092	6.08963	6.12545	6.31987	6.38509	6.31152	6.3557	4.56077	4.14658	4.23612	3.68936	4.12199	4.95948	4.46672	6.38783	7.47757	7.40401	7.48153	7.49454	7.50677	7.41581	7.42036	7.49969	7.50795	7.42252
0.204	6.44841	6.45215	6.47586	6.31555	6.08212	6.11807	6.31441	6.38014	6.30589	6.35041	4.56406	4.1506	4.24016	3.69311	4.12656	4.96241	4.47003	6.38217	7.472	7.39771	7.476	7.48914	7.50145	7.4096	7.41419	7.49429	7.50265	7.41634
0.205	6.44415	6.4478	6.47179	6.31017	6.0746	6.11068	6.30896	6.37519	6.30027	6.34513	4.56732	4.15461	4.24419	3.69685	4.13113	4.96528	4.47331	6.3765	7.46642	7.39141	7.47047	7.48374	7.49614	7.40339	7.40802	7.4889	7.49734	7.41017
0.206	6.4399	6.44345	6.46772	6.30479	6.06707	6.10329	6.3035	6.37024	6.29464	6.33984	4.57055	4.15861	4.2482	3.70059	4.13568	4.9681	4.47657	6.37083	7.46085	7.38511	7.46495	7.47834	7.49083	7.39717	7.40184	7.4835	7.49203	7.404
0.207	6.43564	6.4391	6.46366	6.29942	6.05955	6.0959	6.29803	6.36529	6.28901	6.33455	4.57375	4.16259	4.25219	3.70432	4.14021	4.97087	4.4798	6.36516	7.45528	7.37881	7.45942	7.47294	7.48552	7.39096	7.39567	7.4781	7.48671	7.39783
0.208	6.43138	6.43475	6.45959	6.29404	6.05202	6.08851	6.29257	6.36034	6.28338	6.32925	4.57692	4.16656	4.25617	3.70804	4.14473	4.97358	4.483	6.35949	7.44971	7.37251	7.45389	7.46754	7.4802	7.38474	7.3895	7.4727	7.4814	7.39165
0.209	6.42712	6.43041	6.45552	6.28866	6.04449	6.08111	6.28711	6.35539	6.27775	6.32396	4.58006	4.17052	4.26013	3.71176	4.14924	4.97625	4.48619	6.35382	7.44413	7.3662	7.44836	7.46214	7.47489	7.37853	7.38332	7.4673	7.47609	7.38547
0.21	6.42286	6.42606	6.45145	6.28327	6.03696	6.07371	6.28164	6.35043	6.27211	6.31867	4.58317	4.17446	4.26408	3.71548	4.15374	4.97885	4.48934	6.34815	7.43856	7.3599	7.44283	7.45674	7.46957	7.37231	7.37714	7.4619	7.47078	7.3793
0.211	6.41861	6.42171	6.44738	6.27789	6.02942	6.0663	6.27618	6.34548	6.26648	6.31337	4.58625	4.17839	4.26801	3.71919	4.15822	4.98141	4.49248	6.34248	7.43298	7.35359	7.43729	7.45134	7.46426	7.36609	7.37097	7.45649	7.46546	7.37312
0.212	6.41435	6.41736	6.44332	6.27251	6.02188	6.0589	6.27071	6.34052	6.26085	6.30808	4.58929	4.18231	4.27192	3.7229	4.16269	4.98391	4.49558	6.33681	7.42741	7.34729	7.43176	7.44594	7.45894	7.35987	7.36479	7.45109	7.46015	7.36694
0.213	6.41009	6.413	6.43925	6.26713	6.01434	6.05149	6.26524	6.33557	6.25521	6.30278	4.59231	4.18621	4.27582	3.7266	4.16714	4.98635	4.49866	6.33114	7.42183	7.34098	7.42623	7.44054	7.45363	7.35365	7.35861	7.44569	7.45483	7.36076
0.214	6.40583	6.40865	6.43518	6.26174	6.0068	6.04408	6.25978	6.33061	6.24957	6.29748	4.59529	4.19009	4.27969	3.7303	4.17158	4.98875	4.50172	6.32547	7.41626	7.33467	7.4207	7.43513	7.44831	7.34743	7.35243	7.44029	7.44952	7.35458
0.215	6.40156	6.4043	6.43111	6.25636	5.99926	6.03666	6.25431	6.32566	6.24393	6.29218	4.59824	4.19397	4.28355	3.73399	4.17601	4.99109	4.50475	6.31979	7.41068	7.32836	7.41516	7.42973	7.44299	7.34121	7.34625	7.43488	7.4442	7.3484
0.216	6.3973	6.39995	6.42704	6.25097	5.99171	6.02925	6.24884	6.3207	6.2383	6.28688	4.60116	4.19782	4.2874	3.73767	4.18042	4.99338	4.50776	6.31412	7.4051	7.32205	7.40963	7.42432	7.43768	7.33499	7.34007	7.42948	7.43889	7.34222
0.217	6.39304	6.3956	6.42296	6.24558	5.98416	6.02183	6.24337	6.31574	6.23266	6.28158	4.60405	4.20167	4.29123	3.74135	4.18481	4.99561	4.51074	6.30845	7.39952	7.31574	7.40409	7.41892	7.43236	7.32876	7.33389	7.42407	7.43357	7.33604
0.218	6.38878	6.39124	6.41889	6.2402	5.97661	6.01441	6.23789	6.31078	6.22701	6.27628	4.60691	4.2055	4.29503	3.74503	4.1892	4.9978	4.51369	6.30278	7.39395	7.30943	7.39856	7.41351	7.42704	7.32254	7.3277	7.41867	7.42825	7.32985
0.219	6.38452	6.38689	6.41482	6.23481	5.96906	6.00699	6.23242	6.30582	6.22137	6.27098	4.60974	4.20931	4.29883	3.7487	4.19356	4.99993	4.51662	6.29711	7.38837	7.30312	7.39302	7.40811	7.42172	7.31631	7.32152	7.41326	7.42294	7.32367
0.22	6.38026	6.38254	6.41075	6.22942	5.96151	5.99956	6.22695	6.30086	6.21573	6.26568	4.61253	4.21311	4.3026	3.75236	4.19791	5.00201	4.51952	6.29144	7.38279	7.29681	7.38749	7.4027	7.4164	7.31009	7.31534	7.40786	7.41762	7.31748
0.221	6.37599	6.37818	6.40668	6.22403	5.95395	5.99214	6.22148	6.2959	6.21009	6.26038	4.61529	4.21689	4.30636	3.75602	4.20225	5.00404	4.52239	6.28576	7.37721	7.29049	7.38195	7.3973	7.41108	7.30386	7.30915	7.40245	7.4123	7.3113
0.222	6.37173	6.37383	6.40261	6.21864	5.94639	5.98471	6.216	6.29094	6.20444	6.25508	4.61802	4.22066	4.3101	3.75967	4.20657	5.00602	4.52524	6.28009	7.37163	7.28418	7.37641	7.39189	7.40576	7.29763	7.30297	7.39704	7.40698	7.30511
0.223	6.36747	6.36947	6.39853	6.21325	5.93884	5.97728	6.21053	6.28598	6.1988	6.24977	4.62072	4.22442	4.31382	3.76332	4.21088	5.00794	4.52807	6.27442	7.36605	7.27786	7.37087	7.38648	7.40044	7.29141	7.29678	7.39164	7.40166	7.29893
0.224	6.3632	6.36512	6.39446	6.20786	5.93127	5.96985	6.20505	6.28102	6.19315	6.24447	4.62339	4.22815	4.31752	3.76696	4.21517	5.00982	4.53086	6.26874	7.36047	7.27155	7.36534	7.38108	7.39512	7.28518	7.2906	7.38623	7.39634	7.29274
0.225	6.35894	6.36076	6.39039	6.20247	5.92371	5.96242	6.19957	6.27606	6.18751	6.23916	4.62602	4.23188	4.3212	3.7706	4.21944	5.01164	4.53363	6.26307	7.35488	7.26523	7.3598	7.37567	7.3898	7.27895	7.28441	7.38082	7.39102	7.28655
0.226	6.35467	6.35641	6.38632	6.19707	5.91615	5.95498	6.1941	6.2711	6.18186	6.23386	4.62862	4.23559	4.32487	3.77423	4.2237	5.01342	4.53638	6.2574	7.3493	7.25892	7.35426	7.37026	7.38448	7.27272	7.27822	7.37542	7.3857	7.28037
0.227	6.35041	6.35205	6.38224	6.19168	5.90858	5.94755	6.18862	6.26613	6.17621	6.22855	4.63119	4.23928	4.32852	3.77786	4.22794	5.01514	4.53909	6.25172	7.34372	7.2526	7.34872	7.36485	7.37916	7.26649	7.27203	7.37001	7.38038	7.27418
0.228	6.34615	6.3477	6.37817	6.18629	5.90102	5.94011	6.18314	6.26117	6.17056	6.22324	4.63373	4.24295	4.33215	3.78148	4.23217	5.01682	4.54178	6.24605	7.33814	7.24628	7.34318	7.35945	7.37384	7.26026	7.26585	7.3646	7.37506	7.26799
0.229	6.34188	6.34334	6.3741	6.18089	5.89345	5.93267	6.17766	6.25621	6.16491	6.21794	4.63623	4.24661	4.33576	3.78509	4.23638	5.01844	4.54445	6.24038	7.33256	7.23996	7.33765	7.35404	7.36852	7.25403	7.25966	7.35919	7.36974	7.2618
0.23	6.33762	6.33898	6.37002	6.1755	5.88588	5.92523	6.17218	6.25124	6.15926	6.21263	4.6387	4.25026	4.33935	3.7887	4.24058	5.02002	4.54709	6.2347	7.32697	7.23365	7.33211	7.34863	7.3632	7.2478	7.25347	7.35378	7.36442	7.25561
0.231	6.33335	6.33463	6.36595	6.17011	5.87831	5.91779	6.1667	6.24628	6.15361	6.20732	4.64114	4.25389	4.34292	3.7923	4.24475	5.02154	4.5497	6.22903	7.32139	7.22733	7.32657	7.34322	7.35787	7.24156	7.24728	7.34837	7.3591	7.24942
0.232	6.32909	6.33027	6.36187	6.16471	5.87073	5.91034	6.16122	6.24131	6.14796	6.20201	4.64355	4.2575	4.34647	3.79589	4.24892	5.02302	4.55228	6.22335	7.31581	7.22101	7.32103	7.33781	7.35255	7.23533	7.24109	7.34296	7.35378	7.24323
0.233	6.32482	6.32591	6.3578	6.15931	5.86316	5.9029	6.15574	6.23635	6.14231	6.19671	4.64592	4.2611	4.35001	3.79948	4.25306	5.02445	4.55483	6.21768	7.31022	7.21469	7.31549	7.3324	7.34723	7.2291	7.2349	7.33755	7.34846	7.23704
0.234	6.32055	6.32156	6.35373	6.15392	5.85559	5.89545	6.15026	6.23139	6.13666	6.1914	4.64827	4.26468	4.35352	3.80307	4.25719	5.02583	4.55736	6.212	7.30464	7.20837	7.30995	7.32699	7.34191	7.22287	7.22871	7.33214	7.34314	7.23085
0.235	6.31629	6.3172	6.34965	6.14852	5.84801	5.888	6.14478	6.22642	6.13101	6.18609	4.65057	4.26824	4.35702	3.80665	4.2613	5.02716	4.55987	6.20633	7.29906	7.20205	7.30441	7.32158	7.33658	7.21663	7.22252	7.32673	7.33781	7.22466
0.236	6.31202	6.31284	6.34558	6.14313	5.84043	5.88055	6.1393	6.22145	6.12536	6.18078	4.65285	4.27179	4.3605	3.81022	4.26539	5.02844	4.56234	6.20066	7.29347	7.19573	7.29886	7.31617	7.33126	7.2104	7.21633	7.32132	7.33249	7.21847
0.237	6.30776	6.30848	6.3415	6.13773	5.83285	5.8731	6.13382	6.21649	6.1197	6.17547	4.65509	4.27532	4.36395	3.81378	4.26947	5.02968	4.56479	6.19498	7.28789	7.18941	7.29332	7.31076	7.32594	7.20416	7.21013	7.31591	7.32717	7.21227
0.238	6.30349	6.30413	6.33743	6.13233	5.82527	5.86565	6.12833	6.21152	6.11405	6.17016	4.6573	4.27883	4.36739	3.81734	4.27353	5.03087	4.56721	6.18931	7.2823	7.18308	7.28778	7.30535	7.32061	7.19793	7.20394	7.3105	7.32185	7.20608
0.239	6.29922	6.29977	6.33335	6.12693	5.81769	5.8582	6.12285	6.20656	6.10839	6.16484	4.65948	4.28233	4.37081	3.8209	4.27757	5.03202	4.5696	6.18363	7.27672	7.17676	7.28224	7.29994	7.31529	7.19169	7.19775	7.30509	7.31652	7.19989
0.24	6.29496	6.29541	6.32928	6.12153	5.81011	5.85075	6.11737	6.20159	6.10274	6.15953	4.66163	4.28581	4.3742	3.82444	4.2816	5.03311	4.57196	6.17795	7.27113	7.17044	7.2767	7.29453	7.30997	7.18546	7.19156	7.29968	7.3112	7.19369
0.241	6.29069	6.29105	6.3252	6.11614	5.80253	5.84329	6.11188	6.19662	6.09708	6.15422	4.66374	4.28927	4.37758	3.82798	4.2856	5.03416	4.5743	6.17228	7.26555	7.16412	7.27116	7.28912	7.30464	7.17922	7.18536	7.29427	7.30588	7.1875
0.242	6.28642	6.28669	6.32113	6.11074	5.79494	5.83584	6.1064	6.19166	6.09143	6.14891	4.66582	4.29272	4.38094	3.83152	4.28959	5.03517	4.57661	6.1666	7.25996	7.15779	7.26562	7.28371	7.29932	7.17299	7.17917	7.28886	7.30055	7.18131
0.243	6.28215	6.28233	6.31705	6.10534	5.78736	5.82838	6.10091	6.18669	6.08577	6.1436	4.66786	4.29614	4.38427	3.83505	4.29356	5.03613	4.57889	6.16093	7.25437	7.15147	7.26007	7.27829	7.294	7.16675	7.17298	7.28345	7.29523	7.17511
0.244	6.27789	6.27798	6.31298	6.09994	5.77977	5.82092	6.09543	6.18172	6.08012	6.13828	4.66988	4.29955	4.38759	3.83857	4.29752	5.03705	4.58115	6.15525	7.24879	7.14515	7.25453	7.27288	7.28867	7.16051	7.16678	7.27804	7.28991	7.16892
0.245	6.27362	6.27362	6.3089	6.09454	5.77219	5.81346	6.08994	6.17675	6.07446	6.13297	4.67186	4.30295	4.39088	3.84208	4.30145	5.03792	4.58337	6.14958	7.2432	7.13882	7.24899	7.26747	7.28335	7.15428	7.16059	7.27263	7.28458	7.16272
0.246	6.26935	6.26926	6.30482	6.08914	5.7646	5.806	6.08446	6.17178	6.0688	6.12766	4.6738	4.30632	4.39416	3.84559	4.30537	5.03874	4.58557	6.1439	7.23762	7.1325	7.24345	7.26206	7.27802	7.14804	7.15439	7.26721	7.27926	7.15653
0.247	6.26509	6.2649	6.30075	6.08374	5.75701	5.79854	6.07897	6.16682	6.06315	6.12234	4.67572	4.30968	4.39741	3.84909	4.30927	5.03952	4.58774	6.13822	7.23203	7.12617	7.2379	7.25665	7.2727	7.1418	7.1482	7.2618	7.27393	7.15033
0.248	6.26082	6.26054	6.29667	6.07834	5.74942	5.79108	6.07349	6.16185	6.05749	6.11703	4.6776	4.31302	4.40064	3.85259	4.31315	5.04026	4.58989	6.13255	7.22644	7.11985	7.23236	7.25123	7.26737	7.13557	7.142	7.25639	7.26861	7.14414
0.249	6.25655	6.25618	6.2926	6.07294	5.74183	5.78362	6.068	6.15688	6.05183	6.11172	4.67945	4.31634	4.40386	3.85608	4.31701	5.04096	4.592	6.12687	7.22086	7.11352	7.22682	7.24582	7.26205	7.12933	7.13581	7.25098	7.26329	7.13794
0.25	6.25228	6.25182	6.28852	6.06753	5.73424	5.77615	6.06251	6.15191	6.04617	6.1064	4.68126	4.31965	4.40705	3.85956	4.32085	5.04161	4.59409	6.1212	7.21527	7.1072	7.22127	7.24041	7.25672	7.12309	7.12961	7.24556	7.25796	7.13175
0.251	6.24801	6.24746	6.28444	6.06213	5.72665	5.76869	6.05702	6.14694	6.04051	6.10109	4.68305	4.32293	4.41022	3.86303	4.32467	5.04222	4.59615	6.11552	7.20968	7.10087	7.21573	7.235	7.2514	7.11685	7.12342	7.24015	7.25264	7.12555
0.252	6.24375	6.2431	6.28037	6.05673	5.71906	5.76122	6.05154	6.14197	6.03485	6.09577	4.6848	4.3262	4.41337	3.8665	4.32847	5.04278	4.59818	6.10984	7.2041	7.09455	7.21019	7.22958	7.24607	7.11061	7.11722	7.23474	7.24731	7.11935
0.253	6.23948	6.23874	6.27629	6.05133	5.71146	5.75376	6.04605	6.137	6.02919	6.09046	4.68651	4.32945	4.41649	3.86996	4.33226	5.04331	4.60019	6.10417	7.19851	7.08822	7.20464	7.22417	7.24075	7.10437	7.11103	7.22933	7.24199	7.11316
0.254	6.23521	6.23438	6.27221	6.04593	5.70387	5.74629	6.04056	6.13203	6.02353	6.08514	4.6882	4.33268	4.4196	3.87341	4.33602	5.04379	4.60216	6.09849	7.19292	7.0819	7.1991	7.21876	7.23542	7.09813	7.10483	7.22391	7.23666	7.10696
0.255	6.23094	6.23002	6.26814	6.04052	5.69627	5.73882	6.03507	6.12706	6.01787	6.07983	4.68985	4.33589	4.42268	3.87686	4.33977	5.04423	4.60411	6.09281	7.18733	7.07557	7.19356	7.21335	7.2301	7.09189	7.09863	7.2185	7.23134	7.10076
0.256	6.22667	6.22566	6.26406	6.03512	5.68868	5.73136	6.02958	6.12209	6.01221	6.07451	4.69147	4.33909	4.42575	3.8803	4.34349	5.04463	4.60603	6.08714	7.18175	7.06924	7.18801	7.20793	7.22477	7.08565	7.09244	7.21309	7.22601	7.09457
0.257	6.2224	6.2213	6.25998	6.02972	5.68108	5.72389	6.0241	6.11712	6.00655	6.06919	4.69305	4.34226	4.42879	3.88373	4.3472	5.04499	4.60792	6.08146	7.17616	7.06291	7.18247	7.20252	7.21944	7.07941	7.08624	7.20768	7.22069	7.08837
0.258	6.21813	6.21694	6.25591	6.02432	5.67348	5.71642	6.01861	6.11215	6.00089	6.06388	4.69461	4.34542	4.43181	3.88716	4.35088	5.04531	4.60978	6.07578	7.17057	7.05659	7.17692	7.19711	7.21412	7.07317	7.08004	7.20226	7.21536	7.08217
0.259	6.21387	6.21258	6.25183	6.01891	5.66589	5.70895	6.01312	6.10718	5.99523	6.05856	4.69613	4.34856	4.4348	3.89057	4.35455	5.04559	4.61162	6.07011	7.16498	7.05026	7.17138	7.19169	7.20879	7.06693	7.07384	7.19685	7.21003	7.07597
0.26	6.2096	6.20822	6.24775	6.01351	5.65829	5.70148	6.00763	6.10221	5.98957	6.05324	4.69761	4.35167	4.43778	3.89398	4.35819	5.04583	4.61342	6.06443	7.15939	7.04393	7.16583	7.18628	7.20347	7.06069	7.06765	7.19144	7.20471	7.06978
0.261	6.20533	6.20386	6.24368	6.00811	5.65069	5.694	6.00214	6.09724	5.98391	6.04793	4.69907	4.35477	4.44073	3.89739	4.36182	5.04604	4.6152	6.05875	7.15381	7.0376	7.16029	7.18087	7.19814	7.05445	7.06145	7.18602	7.19938	7.06358
0.262	6.20106	6.1995	6.2396	6.0027	5.64309	5.68653	5.99665	6.09227	5.97824	6.04261	4.70049	4.35785	4.44366	3.90078	4.36542	5.0462	4.61695	6.05308	7.14822	7.03128	7.15474	7.17545	7.19281	7.04821	7.05525	7.18061	7.19406	7.05738
0.263	6.19679	6.19514	6.23552	5.9973	5.63549	5.67906	5.99116	6.0873	5.97258	6.03729	4.70188	4.36091	4.44657	3.90417	4.36901	5.04632	4.61868	6.0474	7.14263	7.02495	7.1492	7.17004	7.18749	7.04197	7.04905	7.17519	7.18873	7.05118
0.264	6.19252	6.19078	6.23144	5.99189	5.62789	5.67158	5.98567	6.08233	5.96692	6.03198	4.70324	4.36396	4.44945	3.90755	4.37257	5.04641	4.62037	6.04172	7.13704	7.01862	7.14366	7.16463	7.18216	7.03573	7.04286	7.16978	7.1834	7.04498
0.265	6.18825	6.18641	6.22737	5.98649	5.62029	5.66411	5.98018	6.07736	5.96126	6.02666	4.70456	4.36698	4.45232	3.91093	4.37611	5.04646	4.62204	6.03604	7.13145	7.01229	7.13811	7.15921	7.17683	7.02949	7.03666	7.16437	7.17808	7.03879
0.266	6.18398	6.18205	6.22329	5.98108	5.61268	5.65664	5.97469	6.07239	5.95559	6.02134	4.70586	4.36998	4.45516	3.91429	4.37963	5.04647	4.62368	6.03037	7.12586	7.00596	7.13257	7.1538	7.17151	7.02325	7.03046	7.15895	7.17275	7.03259
0.267	6.17971	6.17769	6.21921	5.97568	5.60508	5.64916	5.9692	6.06742	5.94993	6.01602	4.70712	4.37296	4.45798	3.91765	4.38313	5.04644	4.62529	6.02469	7.12027	6.99963	7.12702	7.14838	7.16618	7.01701	7.02426	7.15354	7.16743	7.02639
0.268	6.17544	6.17333	6.21514	5.97027	5.59748	5.64168	5.96371	6.06245	5.94427	6.0107	4.70834	4.37593	4.46077	3.921	4.38661	5.04638	4.62687	6.01901	7.11469	6.99331	7.12147	7.14297	7.16085	7.01076	7.01806	7.14812	7.1621	7.02019
0.269	6.17117	6.16897	6.21106	5.96487	5.58987	5.63421	5.95821	6.05747	5.9386	6.00539	4.70954	4.37887	4.46354	3.92434	4.39007	5.04628	4.62842	6.01334	7.1091	6.98698	7.11593	7.13756	7.15553	7.00452	7.01186	7.14271	7.15677	7.01399
0.27	6.1669	6.16461	6.20698	5.95946	5.58227	5.62673	5.95272	6.0525	5.93294	6.00007	4.7107	4.38179	4.46629	3.92768	4.39351	5.04615	4.62995	6.00766	7.10351	6.98065	7.11038	7.13214	7.1502	6.99828	7.00566	7.1373	7.15145	7.00779
0.271	6.16263	6.16025	6.2029	5.95406	5.57467	5.61925	5.94723	6.04753	5.92728	5.99475	4.71184	4.3847	4.46902	3.931	4.39692	5.04598	4.63144	6.00198	7.09792	6.97432	7.10484	7.12673	7.14487	6.99204	6.99946	7.13188	7.14612	7.00159
0.272	6.15836	6.15589	6.19883	5.94865	5.56706	5.61177	5.94174	6.04256	5.92161	5.98943	4.71294	4.38758	4.47172	3.93432	4.40031	5.04578	4.63291	5.9963	7.09233	6.96799	7.09929	7.12131	7.13955	6.9858	6.99326	7.12647	7.14079	6.99539
0.273	6.1541	6.15152	6.19475	5.94325	5.55945	5.60429	5.93625	6.03759	5.91595	5.98411	4.714	4.39044	4.4744	3.93763	4.40369	5.04554	4.63436	5.99062	7.08674	6.96166	7.09375	7.1159	7.13422	6.97955	6.98707	7.12105	7.13547	6.98919
0.274	6.14983	6.14716	6.19067	5.93784	5.55185	5.59682	5.93076	6.03262	5.91028	5.97879	4.71504	4.39328	4.47706	3.94094	4.40704	5.04526	4.63577	5.98495	7.08115	6.95533	7.0882	7.11048	7.12889	6.97331	6.98087	7.11564	7.13014	6.98299
0.275	6.14556	6.1428	6.18659	5.93244	5.54424	5.58934	5.92526	6.02764	5.90462	5.97347	4.71605	4.39611	4.47969	3.94423	4.41036	5.04495	4.63715	5.97927	7.07556	6.949	7.08266	7.10507	7.12357	6.96707	6.97467	7.11022	7.12481	6.97679
0.276	6.14129	6.13844	6.18251	5.92703	5.53663	5.58186	5.91977	6.02267	5.89895	5.96815	4.71702	4.39891	4.4823	3.94752	4.41367	5.04461	4.63851	5.97359	7.06997	6.94267	7.07711	7.09965	7.11824	6.96083	6.96847	7.10481	7.11949	6.97059
0.277	6.13702	6.13408	6.17844	5.92162	5.52903	5.57437	5.91428	6.0177	5.89329	5.96284	4.71796	4.40169	4.48489	3.9508	4.41695	5.04424	4.63984	5.96791	7.06438	6.93634	7.07156	7.09424	7.11291	6.95458	6.96227	7.09939	7.11416	6.96439
0.278	6.13275	6.12972	6.17436	5.91622	5.52142	5.56689	5.90879	6.01273	5.88762	5.95752	4.71887	4.40445	4.48745	3.95407	4.42021	5.04383	4.64114	5.96224	7.05879	6.93001	7.06602	7.08882	7.10758	6.94834	6.95607	7.09398	7.10883	6.95819
0.279	6.12848	6.12535	6.17028	5.91081	5.51381	5.55941	5.90329	6.00775	5.88196	5.9522	4.71975	4.40719	4.48999	3.95733	4.42345	5.04339	4.64242	5.95656	7.0532	6.92368	7.06047	7.08341	7.10226	6.9421	6.94987	7.08857	7.10351	6.95199
0.28	6.12421	6.12099	6.1662	5.9054	5.5062	5.55193	5.8978	6.00278	5.87629	5.94688	4.72059	4.40991	4.4925	3.96058	4.42667	5.04291	4.64366	5.95088	7.04761	6.91735	7.05493	7.07799	7.09693	6.93585	6.94367	7.08315	7.09818	6.94579
0.281	6.11994	6.11663	6.16213	5.9	5.49859	5.54445	5.89231	5.99781	5.87063	5.94156	4.72141	4.41261	4.49499	3.96383	4.42986	5.04241	4.64488	5.9452	7.04202	6.91102	7.04938	7.07258	7.0916	6.92961	6.93747	7.07774	7.09285	6.93959
0.282	6.11567	6.11227	6.15805	5.89459	5.49098	5.53696	5.88681	5.99284	5.86496	5.93624	4.7222	4.41528	4.49746	3.96706	4.43303	5.04187	4.64607	5.93952	7.03643	6.90469	7.04383	7.06717	7.08627	6.92337	6.93127	7.07232	7.08752	6.93339
0.283	6.1114	6.10791	6.15397	5.88918	5.48337	5.52948	5.88132	5.98786	5.85929	5.93092	4.72295	4.41794	4.49991	3.97029	4.43618	5.0413	4.64723	5.93385	7.03084	6.89835	7.03829	7.06175	7.08095	6.91712	6.92506	7.06691	7.0822	6.92719
0.284	6.10713	6.10354	6.14989	5.88378	5.47576	5.522	5.87583	5.98289	5.85363	5.9256	4.72367	4.42057	4.50232	3.97351	4.4393	5.0407	4.64837	5.92817	7.02525	6.89202	7.03274	7.05633	7.07562	6.91088	6.91886	7.06149	7.07687	6.92099
0.285	6.10285	6.09918	6.14581	5.87837	5.46815	5.51451	5.87033	5.97792	5.84796	5.92028	4.72437	4.42319	4.50472	3.97672	4.4424	5.04007	4.64948	5.92249	7.01966	6.88569	7.0272	7.05092	7.07029	6.90463	6.91266	7.05608	7.07154	6.91479
0.286	6.09858	6.09482	6.14174	5.87296	5.46054	5.50703	5.86484	5.97294	5.8423	5.91496	4.72503	4.42578	4.50709	3.97992	4.44548	5.03941	4.65056	5.91681	7.01407	6.87936	7.02165	7.0455	7.06496	6.89839	6.90646	7.05066	7.06622	6.90859
0.287	6.09431	6.09046	6.13766	5.86755	5.45293	5.49954	5.85935	5.96797	5.83663	5.90963	4.72566	4.42835	4.50944	3.98312	4.44853	5.03872	4.65161	5.91113	7.00848	6.87303	7.0161	7.04009	7.05964	6.89215	6.90026	7.04525	7.06089	6.90238
0.288	6.09004	6.0861	6.13358	5.86215	5.44532	5.49206	5.85385	5.963	5.83096	5.90431	4.72626	4.4309	4.51176	3.9863	4.45157	5.038	4.65263	5.90545	7.00289	6.8667	7.01056	7.03467	7.05431	6.8859	6.89406	7.03983	7.05556	6.89618
0.289	6.08577	6.08173	6.1295	5.85674	5.43771	5.48457	5.84836	5.95802	5.8253	5.89899	4.72683	4.43343	4.51406	3.98948	4.45457	5.03724	4.65363	5.89978	6.9973	6.86037	7.00501	7.02926	7.04898	6.87966	6.88786	7.03441	7.05023	6.88998
0.29	6.0815	6.07737	6.12542	5.85133	5.43009	5.47709	5.84286	5.95305	5.81963	5.89367	4.72737	4.43594	4.51634	3.99264	4.45756	5.03647	4.6546	5.8941	6.99171	6.85404	6.99946	7.02384	7.04365	6.87341	6.88166	7.029	7.04491	6.88378
0.291	6.07723	6.07301	6.12135	5.84592	5.42248	5.4696	5.83737	5.94808	5.81396	5.88835	4.72788	4.43842	4.51859	3.9958	4.46052	5.03566	4.65554	5.88842	6.98612	6.8477	6.99392	7.01843	7.03833	6.86717	6.87546	7.02358	7.03958	6.87758
0.292	6.07296	6.06865	6.11727	5.84051	5.41487	5.46211	5.83188	5.9431	5.80829	5.88303	4.72836	4.44089	4.52081	3.99895	4.46345	5.03482	4.65646	5.88274	6.98053	6.84137	6.98837	7.01301	7.033	6.86092	6.86926	7.01817	7.03425	6.87138
0.293	6.06869	6.06428	6.11319	5.83511	5.40725	5.45463	5.82638	5.93813	5.80263	5.87771	4.72881	4.44333	4.52301	4.00209	4.46637	5.03396	4.65735	5.87706	6.97494	6.83504	6.98282	7.0076	7.02767	6.85468	6.86305	7.01275	7.02892	6.86518
0.294	6.06442	6.05992	6.10911	5.8297	5.39964	5.44714	5.82089	5.93316	5.79696	5.87239	4.72923	4.44575	4.52519	4.00522	4.46925	5.03306	4.65821	5.87138	6.96935	6.82871	6.97728	7.00218	7.02234	6.84843	6.85685	7.00734	7.02359	6.85897
0.295	6.06015	6.05556	6.10503	5.82429	5.39203	5.43965	5.81539	5.92818	5.79129	5.86707	4.72962	4.44815	4.52734	4.00834	4.47212	5.03214	4.65904	5.86571	6.96376	6.82238	6.97173	6.99677	7.01701	6.84219	6.85065	7.00192	7.01827	6.85277
0.296	6.05588	6.0512	6.10095	5.81888	5.38441	5.43216	5.8099	5.92321	5.78562	5.86175	4.72998	4.45052	4.52947	4.01145	4.47496	5.0312	4.65985	5.86003	6.95817	6.81604	6.96618	6.99135	7.01169	6.83594	6.84445	6.99651	7.01294	6.84657
0.297	6.05161	6.04684	6.09688	5.81347	5.3768	5.42468	5.8044	5.91824	5.77996	5.85642	4.73031	4.45288	4.53157	4.01456	4.47778	5.03022	4.66063	5.85435	6.95258	6.80971	6.96064	6.98594	7.00636	6.8297	6.83825	6.99109	7.00761	6.84037
0.298	6.04734	6.04247	6.0928	5.80806	5.36918	5.41719	5.79891	5.91326	5.77429	5.8511	4.73061	4.45521	4.53365	4.01765	4.48057	5.02922	4.66138	5.84867	6.94699	6.80338	6.95509	6.98052	7.00103	6.82345	6.83205	6.98568	7.00228	6.83417
0.299	6.04307	6.03811	6.08872	5.80266	5.36157	5.4097	5.79341	5.90829	5.76862	5.84578	4.73089	4.45752	4.5357	4.02073	4.48333	5.0282	4.66211	5.84299	6.9414	6.79705	6.94954	6.9751	6.9957	6.81721	6.82584	6.98026	6.99696	6.82796
0.3	6.0388	6.03375	6.08464	5.79725	5.35395	5.40221	5.78792	5.90331	5.76295	5.84046	4.73113	4.45981	4.53773	4.02381	4.48608	5.02714	4.6628	5.83731	6.93581	6.79071	6.944	6.96969	6.99037	6.81096	6.81964	6.97484	6.99163	6.82176
0.301	6.03453	6.02938	6.08056	5.79184	5.34633	5.39472	5.78242	5.89834	5.75728	5.83514	4.73135	4.46207	4.53974	4.02687	4.48879	5.02607	4.66348	5.83163	6.93022	6.78438	6.93845	6.96427	6.98505	6.80472	6.81344	6.96943	6.9863	6.81556
0.302	6.03026	6.02502	6.07648	5.78643	5.33872	5.38723	5.77693	5.89337	5.75162	5.82982	4.73153	4.46432	4.54171	4.02993	4.49149	5.02496	4.66412	5.82596	6.92463	6.77805	6.9329	6.95886	6.97972	6.79847	6.80724	6.96401	6.98097	6.80936
0.303	6.02598	6.02066	6.0724	5.78102	5.3311	5.37974	5.77143	5.88839	5.74595	5.82449	4.73169	4.46654	4.54367	4.03297	4.49416	5.02383	4.66474	5.82028	6.91903	6.77172	6.92735	6.95344	6.97439	6.79223	6.80104	6.9586	6.97564	6.80315
0.304	6.02171	6.0163	6.06833	5.77561	5.32349	5.37225	5.76594	5.88342	5.74028	5.81917	4.73182	4.46874	4.5456	4.03601	4.4968	5.02268	4.66533	5.8146	6.91344	6.76538	6.92181	6.94803	6.96906	6.78598	6.79483	6.95318	6.97032	6.79695
0.305	6.01744	6.01193	6.06425	5.7702	5.31587	5.36476	5.76044	5.87844	5.73461	5.81385	4.73192	4.47091	4.5475	4.03903	4.49942	5.0215	4.6659	5.80892	6.90785	6.75905	6.91626	6.94261	6.96373	6.77974	6.78863	6.94777	6.96499	6.79075
0.306	6.01317	6.00757	6.06017	5.76479	5.30825	5.35727	5.75494	5.87347	5.72894	5.80853	4.732	4.47307	4.54938	4.04205	4.50201	5.0203	4.66644	5.80324	6.90226	6.75272	6.91071	6.93719	6.9584	6.77349	6.78243	6.94235	6.95966	6.78455
0.307	6.0089	6.00321	6.05609	5.75938	5.30063	5.34978	5.74945	5.8685	5.72327	5.80321	4.73204	4.4752	4.55124	4.04505	4.50458	5.01907	4.66696	5.79756	6.89667	6.74639	6.90517	6.93178	6.95308	6.76725	6.77623	6.93693	6.95433	6.77834
0.308	6.00463	5.99885	6.05201	5.75397	5.29302	5.34229	5.74395	5.86352	5.7176	5.79788	4.73206	4.47731	4.55306	4.04805	4.50712	5.01782	4.66744	5.79188	6.89108	6.74005	6.89962	6.92636	6.94775	6.761	6.77003	6.93152	6.949	6.77214
0.309	6.00036	5.99448	6.04793	5.74857	5.2854	5.33479	5.73846	5.85855	5.71193	5.79256	4.73205	4.47939	4.55487	4.05104	4.50964	5.01655	4.66791	5.7862	6.88549	6.73372	6.89407	6.92095	6.94242	6.75475	6.76382	6.9261	6.94367	6.76594
0.31	5.99609	5.99012	6.04386	5.74316	5.27778	5.3273	5.73296	5.85357	5.70626	5.78724	4.73201	4.48145	4.55665	4.05401	4.51213	5.01525	4.66834	5.78052	6.8799	6.72739	6.88852	6.91553	6.93709	6.74851	6.75762	6.92069	6.93835	6.75974
0.311	5.99182	5.98576	6.03978	5.73775	5.27016	5.31981	5.72746	5.8486	5.7006	5.78192	4.73195	4.4835	4.5584	4.05698	4.5146	5.01393	4.66875	5.77485	6.87431	6.72105	6.88298	6.91011	6.93176	6.74226	6.75142	6.91527	6.93302	6.75353
0.312	5.98755	5.98139	6.0357	5.73234	5.26254	5.31232	5.72197	5.84362	5.69493	5.77659	4.73185	4.48551	4.56013	4.05993	4.51704	5.01259	4.66914	5.76917	6.86872	6.71472	6.87743	6.9047	6.92643	6.73602	6.74522	6.90985	6.92769	6.74733
0.313	5.98328	5.97703	6.03162	5.72693	5.25493	5.30483	5.71647	5.83865	5.68926	5.77127	4.73173	4.48751	4.56184	4.06288	4.51946	5.01123	4.66949	5.76349	6.86312	6.70839	6.87188	6.89928	6.92111	6.72977	6.73901	6.90444	6.92236	6.74113
0.314	5.979	5.97267	6.02754	5.72152	5.24731	5.29733	5.71098	5.83367	5.68359	5.76595	4.73159	4.48948	4.56351	4.06581	4.52185	5.00984	4.66983	5.75781	6.85753	6.70205	6.86633	6.89387	6.91578	6.72353	6.73281	6.89902	6.91703	6.73493
0.315	5.97473	5.96831	6.02346	5.71611	5.23969	5.28984	5.70548	5.8287	5.67792	5.76063	4.73141	4.49143	4.56517	4.06874	4.52421	5.00843	4.67013	5.75213	6.85194	6.69572	6.86079	6.88845	6.91045	6.71728	6.72661	6.89361	6.9117	6.72872
0.316	5.97046	5.96394	6.01938	5.7107	5.23207	5.28235	5.69998	5.82373	5.67225	5.7553	4.73121	4.49336	4.5668	4.07165	4.52655	5.007	4.67042	5.74645	6.84635	6.68939	6.85524	6.88303	6.90512	6.71103	6.7204	6.88819	6.90638	6.72252
0.317	5.96619	5.95958	6.0153	5.70529	5.22445	5.27485	5.69449	5.81875	5.66658	5.74998	4.73098	4.49526	4.5684	4.07455	4.52887	5.00555	4.67067	5.74077	6.84076	6.68305	6.84969	6.87762	6.89979	6.70479	6.7142	6.88277	6.90105	6.71632
0.318	5.96192	5.95522	6.01123	5.69988	5.21683	5.26736	5.68899	5.81378	5.66091	5.74466	4.73073	4.49714	4.56998	4.07745	4.53116	5.00408	4.67091	5.73509	6.83517	6.67672	6.84414	6.8722	6.89446	6.69854	6.708	6.87736	6.89572	6.71011
0.319	5.95765	5.95085	6.00715	5.69447	5.20921	5.25987	5.68349	5.8088	5.65524	5.73933	4.73045	4.499	4.57153	4.08033	4.53342	5.00259	4.67111	5.72941	6.82958	6.67039	6.8386	6.86678	6.88913	6.69229	6.7018	6.87194	6.89039	6.70391
0.32	5.95338	5.94649	6.00307	5.68906	5.20159	5.25237	5.678	5.80383	5.64957	5.73401	4.73014	4.50083	4.57306	4.0832	4.53565	5.00107	4.67129	5.72373	6.82399	6.66405	6.83305	6.86137	6.88381	6.68605	6.69559	6.86652	6.88506	6.69771
0.321	5.94911	5.94213	5.99899	5.68365	5.19397	5.24488	5.6725	5.79885	5.6439	5.72869	4.72981	4.50265	4.57456	4.08606	4.53786	4.99954	4.67145	5.71806	6.81839	6.65772	6.8275	6.85595	6.87848	6.6798	6.68939	6.86111	6.87973	6.6915
0.322	5.94484	5.93776	5.99491	5.67824	5.18635	5.23739	5.667	5.79388	5.63823	5.72336	4.72945	4.50443	4.57604	4.08891	4.54005	4.99799	4.67158	5.71238	6.8128	6.65138	6.82195	6.85054	6.87315	6.67356	6.68319	6.85569	6.87441	6.6853
0.323	5.94056	5.9334	5.99083	5.67283	5.17873	5.22989	5.66151	5.7889	5.63256	5.71804	4.72907	4.5062	4.57749	4.09175	4.54221	4.99641	4.67169	5.7067	6.80721	6.64505	6.81641	6.84512	6.86782	6.66731	6.67698	6.85028	6.86908	6.6791
0.324	5.93629	5.92904	5.98675	5.66742	5.17111	5.2224	5.65601	5.78393	5.62689	5.71272	4.72866	4.50794	4.57892	4.09458	4.54434	4.99482	4.67177	5.70102	6.80162	6.63872	6.81086	6.8397	6.86249	6.66106	6.67078	6.84486	6.86375	6.67289
0.325	5.93202	5.92467	5.98267	5.66201	5.16349	5.2149	5.65051	5.77895	5.62122	5.70739	4.72823	4.50966	4.58032	4.09739	4.54644	4.99321	4.67183	5.69534	6.79603	6.63238	6.80531	6.83429	6.85716	6.65482	6.66458	6.83944	6.85842	6.66669
0.326	5.92775	5.92031	5.9786	5.6566	5.15587	5.20741	5.64502	5.77398	5.61555	5.70207	4.72777	4.51136	4.5817	4.1002	4.54852	4.99157	4.67186	5.68966	6.79044	6.62605	6.79976	6.82887	6.85183	6.64857	6.65837	6.83403	6.85309	6.66049
0.327	5.92348	5.91595	5.97452	5.65119	5.14824	5.19991	5.63952	5.769	5.60988	5.69675	4.72728	4.51303	4.58305	4.103	4.55058	4.98992	4.67187	5.68398	6.78485	6.61971	6.79422	6.82345	6.8465	6.64232	6.65217	6.82861	6.84776	6.65428
0.328	5.91921	5.91159	5.97044	5.64578	5.14062	5.19242	5.63402	5.76403	5.60421	5.69142	4.72677	4.51468	4.58438	4.10578	4.5526	4.98825	4.67186	5.6783	6.77925	6.61338	6.78867	6.81804	6.84118	6.63608	6.64597	6.82319	6.84243	6.64808
0.329	5.91494	5.90722	5.96636	5.64037	5.133	5.18492	5.62853	5.75905	5.59854	5.6861	4.72624	4.51631	4.58568	4.10855	4.5546	4.98657	4.67182	5.67262	6.77366	6.60705	6.78312	6.81262	6.83585	6.62983	6.63976	6.81778	6.83711	6.64188
0.33	5.91067	5.90286	5.96228	5.63496	5.12538	5.17743	5.62303	5.75408	5.59287	5.68078	4.72568	4.51791	4.58696	4.11131	4.55658	4.98486	4.67176	5.66694	6.76807	6.60071	6.77757	6.8072	6.83052	6.62358	6.63356	6.81236	6.83178	6.63567
0.331	5.90639	5.8985	5.9582	5.62954	5.11776	5.16993	5.61753	5.7491	5.5872	5.67545	4.7251	4.51949	4.58821	4.11406	4.55853	4.98313	4.67167	5.66126	6.76248	6.59438	6.77202	6.80179	6.82519	6.61734	6.62736	6.80694	6.82645	6.62947
0.332	5.90212	5.89413	5.95412	5.62413	5.11014	5.16243	5.61203	5.74413	5.58153	5.67013	4.72449	4.52105	4.58944	4.1168	4.56045	4.98139	4.67156	5.65558	6.75689	6.58804	6.76648	6.79637	6.81986	6.61109	6.62115	6.80153	6.82112	6.62326
0.333	5.89785	5.88977	5.95004	5.61872	5.10251	5.15494	5.60654	5.73915	5.57585	5.66481	4.72386	4.52258	4.59064	4.11953	4.56235	4.97963	4.67142	5.64991	6.7513	6.58171	6.76093	6.79096	6.81453	6.60484	6.61495	6.79611	6.81579	6.61706
0.334	5.89358	5.88541	5.94597	5.61331	5.09489	5.14744	5.60104	5.73418	5.57018	5.65948	4.7232	4.52409	4.59181	4.12225	4.56421	4.97786	4.67127	5.64423	6.7457	6.57538	6.75538	6.78554	6.8092	6.59859	6.60875	6.7907	6.81046	6.61086
0.335	5.88931	5.88104	5.94189	5.6079	5.08727	5.13995	5.59554	5.7292	5.56451	5.65416	4.72252	4.52558	4.59297	4.12495	4.56606	4.97606	4.67109	5.63855	6.74011	6.56904	6.74983	6.78012	6.80387	6.59235	6.60254	6.78528	6.80513	6.60465
0.336	5.88504	5.87668	5.93781	5.60249	5.07965	5.13245	5.59004	5.72423	5.55884	5.64884	4.72182	4.52704	4.59409	4.12764	4.56787	4.97425	4.67088	5.63287	6.73452	6.56271	6.74428	6.77471	6.79854	6.5861	6.59634	6.77986	6.7998	6.59845
0.337	5.88077	5.87232	5.93373	5.59708	5.07202	5.12495	5.58455	5.71925	5.55317	5.64351	4.72109	4.52848	4.59519	4.13032	4.56966	4.97242	4.67065	5.62719	6.72893	6.55637	6.73874	6.76929	6.79322	6.57985	6.59014	6.77445	6.79448	6.59225
0.338	5.87649	5.86795	5.92965	5.59167	5.0644	5.11746	5.57905	5.71427	5.5475	5.63819	4.72034	4.5299	4.59627	4.13299	4.57143	4.97058	4.6704	5.62151	6.72334	6.55004	6.73319	6.76387	6.78789	6.57361	6.58393	6.76903	6.78915	6.58604
0.339	5.87222	5.86359	5.92557	5.58626	5.05678	5.10996	5.57355	5.7093	5.54183	5.63287	4.71957	4.53129	4.59732	4.13565	4.57316	4.96872	4.67013	5.61583	6.71775	6.5437	6.72764	6.75846	6.78256	6.56736	6.57773	6.76361	6.78382	6.57984
0.34	5.86795	5.85923	5.92149	5.58085	5.04916	5.10246	5.56805	5.70432	5.53616	5.62754	4.71877	4.53266	4.59835	4.1383	4.57487	4.96684	4.66983	5.61015	6.71215	6.53737	6.72209	6.75304	6.77723	6.56111	6.57152	6.7582	6.77849	6.57363
0.341	5.86368	5.85486	5.91741	5.57544	5.04153	5.09496	5.56256	5.69935	5.53049	5.62222	4.71795	4.53401	4.59935	4.14093	4.57656	4.96495	4.66952	5.60447	6.70656	6.53103	6.71654	6.74762	6.7719	6.55487	6.56532	6.75278	6.77316	6.56743
0.342	5.85941	5.8505	5.91333	5.57003	5.03391	5.08747	5.55706	5.69437	5.52482	5.61689	4.71711	4.53533	4.60033	4.14355	4.57822	4.96304	4.66917	5.59879	6.70097	6.5247	6.711	6.74221	6.76657	6.54862	6.55912	6.74736	6.76783	6.56123
0.343	5.85514	5.84614	5.90926	5.56462	5.02629	5.07997	5.55156	5.6894	5.51914	5.61157	4.71625	4.53663	4.60128	4.14616	4.57985	4.96111	4.66881	5.59311	6.69538	6.51837	6.70545	6.73679	6.76124	6.54237	6.55291	6.74195	6.7625	6.55502
0.344	5.85087	5.84177	5.90518	5.5592	5.01866	5.07247	5.54606	5.68442	5.51347	5.60625	4.71536	4.53791	4.60221	4.14876	4.58145	4.95917	4.66842	5.58743	6.68979	6.51203	6.6999	6.73137	6.75591	6.53612	6.54671	6.73653	6.75717	6.54882
0.345	5.84659	5.83741	5.9011	5.55379	5.01104	5.06498	5.54056	5.67945	5.5078	5.60092	4.71445	4.53916	4.60312	4.15134	4.58303	4.95722	4.66802	5.58175	6.68419	6.5057	6.69435	6.72596	6.75058	6.52988	6.5405	6.73111	6.75185	6.54261
0.346	5.84232	5.83305	5.89702	5.54838	5.00342	5.05748	5.53507	5.67447	5.50213	5.5956	4.71352	4.5404	4.604	4.15392	4.58458	4.95525	4.66758	5.57607	6.6786	6.49936	6.6888	6.72054	6.74525	6.52363	6.5343	6.7257	6.74652	6.53641
0.347	5.83805	5.82868	5.89294	5.54297	4.99579	5.04998	5.52957	5.6695	5.49646	5.59027	4.71257	4.5416	4.60485	4.15648	4.5861	4.95326	4.66713	5.57039	6.67301	6.49303	6.68326	6.71512	6.73993	6.51738	6.5281	6.72028	6.74119	6.53021
0.348	5.83378	5.82432	5.88886	5.53756	4.98817	5.04248	5.52407	5.66452	5.49079	5.58495	4.71159	4.54279	4.60568	4.15903	4.5876	4.95126	4.66666	5.56471	6.66742	6.48669	6.67771	6.70971	6.7346	6.51113	6.52189	6.71486	6.73586	6.524
0.349	5.82951	5.81996	5.88478	5.53215	4.98054	5.03498	5.51857	5.65954	5.48512	5.57962	4.7106	4.54395	4.60649	4.16156	4.58907	4.94925	4.66616	5.55903	6.66183	6.48036	6.67216	6.70429	6.72927	6.50489	6.51569	6.70945	6.73053	6.5178
0.35	5.82524	5.81559	5.8807	5.52674	4.97292	5.02749	5.51307	5.65457	5.47944	5.5743	4.70958	4.54509	4.60727	4.16409	4.59052	4.94722	4.66564	5.55335	6.65623	6.47402	6.66661	6.69887	6.72394	6.49864	6.50949	6.70403	6.7252	6.51159
0.351	5.82097	5.81123	5.87662	5.52133	4.96529	5.01999	5.50758	5.64959	5.47377	5.56898	4.70854	4.5462	4.60803	4.1666	4.59194	4.94517	4.6651	5.54768	6.65064	6.46769	6.66106	6.69346	6.71861	6.49239	6.50328	6.69861	6.71987	6.50539
0.352	5.81669	5.80686	5.87254	5.51591	4.95767	5.01249	5.50208	5.64462	5.4681	5.56365	4.70748	4.54729	4.60876	4.1691	4.59333	4.94312	4.66454	5.542	6.64505	6.46135	6.65552	6.68804	6.71328	6.48614	6.49708	6.6932	6.71454	6.49918
0.353	5.81242	5.8025	5.86847	5.5105	4.95005	5.00499	5.49658	5.63964	5.46243	5.55833	4.7064	4.54836	4.60947	4.17158	4.5947	4.94104	4.66396	5.53632	6.63946	6.45502	6.64997	6.68262	6.70795	6.4799	6.49087	6.68778	6.70921	6.49298
0.354	5.80815	5.79814	5.86439	5.50509	4.94242	4.99749	5.49108	5.63467	5.45676	5.553	4.7053	4.54941	4.61015	4.17406	4.59603	4.93896	4.66336	5.53064	6.63387	6.44868	6.64442	6.67721	6.70262	6.47365	6.48467	6.68236	6.70389	6.48678
0.355	5.80388	5.79377	5.86031	5.49968	4.9348	4.98999	5.48558	5.62969	5.45109	5.54768	4.70418	4.55043	4.61081	4.17652	4.59735	4.93686	4.66273	5.52496	6.62827	6.44235	6.63887	6.67179	6.69729	6.4674	6.47846	6.67695	6.69856	6.48057
0.356	5.79961	5.78941	5.85623	5.49427	4.92717	4.98249	5.48009	5.62471	5.44541	5.54235	4.70303	4.55143	4.61145	4.17897	4.59863	4.93475	4.66209	5.51928	6.62268	6.43601	6.63332	6.66637	6.69196	6.46115	6.47226	6.67153	6.69323	6.47437
0.357	5.79534	5.78505	5.85215	5.48886	4.91955	4.975	5.47459	5.61974	5.43974	5.53703	4.70187	4.5524	4.61206	4.1814	4.59989	4.93262	4.66142	5.5136	6.61709	6.42968	6.62777	6.66096	6.68663	6.45491	6.46606	6.66611	6.6879	6.46816
0.358	5.79106	5.78068	5.84807	5.48345	4.91192	4.9675	5.46909	5.61476	5.43407	5.53171	4.70068	4.55336	4.61265	4.18383	4.60113	4.93049	4.66074	5.50792	6.6115	6.42334	6.62223	6.65554	6.68131	6.44866	6.45985	6.6607	6.68257	6.46196
0.359	5.78679	5.77632	5.84399	5.47803	4.9043	4.96	5.46359	5.60979	5.4284	5.52638	4.69948	4.55429	4.61321	4.18624	4.60233	4.92833	4.66003	5.50224	6.60591	6.41701	6.61668	6.65012	6.67598	6.44241	6.45365	6.65528	6.67724	6.45575
0.36	5.78252	5.77196	5.83991	5.47262	4.89667	4.9525	5.45809	5.60481	5.42273	5.52106	4.69826	4.5552	4.61375	4.18863	4.60352	4.92617	4.6593	5.49656	6.60031	6.41067	6.61113	6.64471	6.67065	6.43616	6.44744	6.64986	6.67191	6.44955
0.361	5.77825	5.76759	5.83583	5.46721	4.88905	4.945	5.45259	5.59984	5.41705	5.51573	4.69701	4.55608	4.61427	4.19102	4.60467	4.92399	4.65856	5.49088	6.59472	6.40434	6.60558	6.63929	6.66532	6.42992	6.44124	6.64444	6.66658	6.44335
0.362	5.77398	5.76323	5.83175	5.4618	4.88142	4.9375	5.4471	5.59486	5.41138	5.51041	4.69575	4.55694	4.61476	4.19339	4.6058	4.9218	4.65779	5.4852	6.58913	6.398	6.60003	6.63387	6.65999	6.42367	6.43504	6.63903	6.66125	6.43714
0.363	5.76971	5.75887	5.82767	5.45639	4.8738	4.93	5.4416	5.58988	5.40571	5.50508	4.69447	4.55778	4.61523	4.19575	4.6069	4.9196	4.657	5.47952	6.58354	6.39167	6.59448	6.62845	6.65466	6.41742	6.42883	6.63361	6.65592	6.43094
0.364	5.76543	5.7545	5.8236	5.45098	4.86617	4.9225	5.4361	5.58491	5.40004	5.49976	4.69317	4.5586	4.61568	4.19809	4.60798	4.91739	4.65619	5.47384	6.57795	6.38533	6.58894	6.62304	6.64933	6.41117	6.42263	6.62819	6.65059	6.42473
0.365	5.76116	5.75014	5.81952	5.44556	4.85855	4.915	5.4306	5.57993	5.39437	5.49443	4.69184	4.55939	4.6161	4.20042	4.60903	4.91516	4.65536	5.46816	6.57235	6.379	6.58339	6.61762	6.644	6.40492	6.41642	6.62278	6.64527	6.41853
0.366	5.75689	5.74577	5.81544	5.44015	4.85092	4.9075	5.4251	5.57496	5.38869	5.48911	4.6905	4.56016	4.6165	4.20274	4.61005	4.91292	4.65452	5.46248	6.56676	6.37266	6.57784	6.6122	6.63867	6.39868	6.41022	6.61736	6.63994	6.41232
0.367	5.75262	5.74141	5.81136	5.43474	4.84329	4.9	5.4196	5.56998	5.38302	5.48378	4.68914	4.56091	4.61688	4.20504	4.61105	4.91068	4.65365	5.4568	6.56117	6.36633	6.57229	6.60679	6.63334	6.39243	6.40401	6.61194	6.63461	6.40612
0.368	5.74835	5.73705	5.80728	5.42933	4.83567	4.8925	5.4141	5.565	5.37735	5.47846	4.68777	4.56163	4.61723	4.20734	4.61202	4.90841	4.65276	5.45112	6.55558	6.35999	6.56674	6.60137	6.62801	6.38618	6.39781	6.60653	6.62928	6.39991
0.369	5.74408	5.73268	5.8032	5.42392	4.82804	4.885	5.40861	5.56003	5.37168	5.47314	4.68637	4.56233	4.61756	4.20961	4.61296	4.90614	4.65186	5.44544	6.54999	6.35366	6.56119	6.59595	6.62268	6.37993	6.3916	6.60111	6.62395	6.39371
0.37	5.7398	5.72832	5.79912	5.41851	4.82042	4.8775	5.40311	5.55505	5.36601	5.46781	4.68496	4.56301	4.61786	4.21188	4.61388	4.90386	4.65093	5.43976	6.54439	6.34732	6.55565	6.59054	6.61736	6.37369	6.3854	6.59569	6.61862	6.3875
0.371	5.73553	5.72396	5.79504	5.41309	4.81279	4.87	5.39761	5.55008	5.36033	5.46249	4.68352	4.56367	4.61815	4.21413	4.61478	4.90156	4.64999	5.43408	6.5388	6.34099	6.5501	6.58512	6.61203	6.36744	6.3792	6.59028	6.61329	6.3813
0.372	5.73126	5.71959	5.79096	5.40768	4.80516	4.8625	5.39211	5.5451	5.35466	5.45716	4.68207	4.5643	4.61841	4.21637	4.61565	4.89926	4.64903	5.4284	6.53321	6.33465	6.54455	6.5797	6.6067	6.36119	6.37299	6.58486	6.60796	6.37509
0.373	5.72699	5.71523	5.78688	5.40227	4.79754	4.855	5.38661	5.54012	5.34899	5.45184	4.6806	4.56492	4.61864	4.21859	4.61649	4.89694	4.64804	5.42272	6.52762	6.32832	6.539	6.57429	6.60137	6.35494	6.36679	6.57944	6.60263	6.36889
0.374	5.72272	5.71087	5.7828	5.39686	4.78991	4.8475	5.38111	5.53515	5.34332	5.44651	4.67912	4.56551	4.61886	4.2208	4.61731	4.89461	4.64704	5.41704	6.52202	6.32198	6.53345	6.56887	6.59604	6.34869	6.36058	6.57403	6.5973	6.36269
0.375	5.71845	5.7065	5.77872	5.39145	4.78229	4.84	5.37561	5.53017	5.33764	5.44119	4.67761	4.56607	4.61905	4.223	4.6181	4.89227	4.64603	5.41136	6.51643	6.31564	6.5279	6.56345	6.59071	6.34245	6.35438	6.56861	6.59197	6.35648
0.376	5.71417	5.70214	5.77465	5.38603	4.77466	4.8325	5.37012	5.5252	5.33197	5.43586	4.67609	4.56662	4.61922	4.22518	4.61886	4.88992	4.64499	5.40568	6.51084	6.30931	6.52236	6.55804	6.58538	6.3362	6.34817	6.56319	6.58664	6.35028
0.377	5.7099	5.69777	5.77057	5.38062	4.76703	4.825	5.36462	5.52022	5.3263	5.43054	4.67455	4.56714	4.61936	4.22735	4.6196	4.88756	4.64393	5.4	6.50525	6.30297	6.51681	6.55262	6.58005	6.32995	6.34197	6.55777	6.58132	6.34407
0.378	5.70563	5.69341	5.76649	5.37521	4.75941	4.8175	5.35912	5.51524	5.32063	5.42521	4.67299	4.56764	4.61949	4.22951	4.62031	4.88519	4.64286	5.39432	6.49966	6.29664	6.51126	6.5472	6.57472	6.3237	6.33576	6.55236	6.57599	6.33787
0.379	5.70136	5.68905	5.76241	5.3698	4.75178	4.81	5.35362	5.51027	5.31495	5.41989	4.67142	4.56812	4.61959	4.23165	4.621	4.88281	4.64177	5.38864	6.49406	6.2903	6.50571	6.54178	6.56939	6.31745	6.32956	6.54694	6.57066	6.33166
0.38	5.69709	5.68468	5.75833	5.36439	4.74415	4.8025	5.34812	5.50529	5.30928	5.41456	4.66983	4.56858	4.61967	4.23377	4.62167	4.88042	4.64066	5.38296	6.48847	6.28397	6.50016	6.53637	6.56406	6.31121	6.32335	6.54152	6.56533	6.32546
0.381	5.69282	5.68032	5.75425	5.35897	4.73653	4.795	5.34262	5.50032	5.30361	5.40924	4.66822	4.56901	4.61972	4.23589	4.6223	4.87802	4.63953	5.37728	6.48288	6.27763	6.49461	6.53095	6.55873	6.30496	6.31715	6.53611	6.56	6.31925
0.382	5.68854	5.67596	5.75017	5.35356	4.7289	4.7875	5.33712	5.49534	5.29794	5.40391	4.66659	4.56942	4.61976	4.23799	4.62292	4.87561	4.63838	5.3716	6.47729	6.2713	6.48907	6.52553	6.5534	6.29871	6.31095	6.53069	6.55467	6.31305
0.383	5.68427	5.67159	5.74609	5.34815	4.72127	4.78	5.33162	5.49036	5.29226	5.39859	4.66495	4.56981	4.61977	4.24007	4.6235	4.87319	4.63722	5.36592	6.47169	6.26496	6.48352	6.52012	6.54807	6.29246	6.30474	6.52527	6.54934	6.30684
0.384	5.68	5.66723	5.74201	5.34274	4.71365	4.7725	5.32612	5.48539	5.28659	5.39326	4.66329	4.57018	4.61976	4.24214	4.62407	4.87076	4.63604	5.36025	6.4661	6.25863	6.47797	6.5147	6.54275	6.28621	6.29854	6.51986	6.54401	6.30064
0.385	5.67573	5.66286	5.73793	5.33733	4.70602	4.76499	5.32063	5.48041	5.28092	5.38794	4.66162	4.57053	4.61973	4.2442	4.6246	4.86832	4.63484	5.35457	6.46051	6.25229	6.47242	6.50928	6.53742	6.27996	6.29233	6.51444	6.53868	6.29443
0.386	5.67146	5.6585	5.73385	5.33191	4.69839	4.75749	5.31513	5.47544	5.27525	5.38261	4.65993	4.57085	4.61967	4.24624	4.62512	4.86587	4.63363	5.34889	6.45492	6.24595	6.46687	6.50387	6.53209	6.27372	6.28613	6.50902	6.53335	6.28823
0.387	5.66718	5.65414	5.72977	5.3265	4.69077	4.74999	5.30963	5.47046	5.26957	5.37729	4.65822	4.57115	4.6196	4.24827	4.6256	4.86341	4.6324	5.34321	6.44932	6.23962	6.46132	6.49845	6.52676	6.26747	6.27992	6.5036	6.52802	6.28202
0.388	5.66291	5.64977	5.7257	5.32109	4.68314	4.74249	5.30413	5.46548	5.2639	5.37196	4.6565	4.57144	4.6195	4.25029	4.62607	4.86094	4.63115	5.33753	6.44373	6.23328	6.45577	6.49303	6.52143	6.26122	6.27372	6.49819	6.52269	6.27582
0.389	5.65864	5.64541	5.72162	5.31568	4.67551	4.73499	5.29863	5.46051	5.25823	5.36664	4.65476	4.5717	4.61938	4.25229	4.6265	4.85846	4.62988	5.33185	6.43814	6.22695	6.45023	6.48761	6.5161	6.25497	6.26751	6.49277	6.51736	6.26961
0.39	5.65437	5.64105	5.71754	5.31026	4.66789	4.72749	5.29313	5.45553	5.25255	5.36131	4.65301	4.57193	4.61924	4.25427	4.62692	4.85598	4.6286	5.32617	6.43255	6.22061	6.44468	6.4822	6.51077	6.24872	6.26131	6.48735	6.51204	6.26341
0.391	5.6501	5.63668	5.71346	5.30485	4.66026	4.71999	5.28763	5.45055	5.24688	5.35599	4.65124	4.57215	4.61908	4.25624	4.6273	4.85348	4.6273	5.32049	6.42696	6.21428	6.43913	6.47678	6.50544	6.24248	6.2551	6.48194	6.50671	6.2572
0.392	5.64583	5.63232	5.70938	5.29944	4.65263	4.71249	5.28213	5.44558	5.24121	5.35066	4.64945	4.57235	4.6189	4.2582	4.62767	4.85098	4.62598	5.31481	6.42136	6.20794	6.43358	6.47136	6.50011	6.23623	6.2489	6.47652	6.50138	6.251
0.393	5.64155	5.62795	5.7053	5.29403	4.645	4.70498	5.27663	5.4406	5.23554	5.34534	4.64765	4.57252	4.61869	4.26014	4.62801	4.84847	4.62465	5.30913	6.41577	6.2016	6.42803	6.46595	6.49478	6.22998	6.24269	6.4711	6.49605	6.24479
0.394	5.63728	5.62359	5.70122	5.28862	4.63738	4.69748	5.27113	5.43563	5.22986	5.34001	4.64584	4.57268	4.61847	4.26207	4.62832	4.84594	4.6233	5.30345	6.41018	6.19527	6.42248	6.46053	6.48945	6.22373	6.23649	6.46568	6.49072	6.23859
0.395	5.63301	5.61923	5.69714	5.2832	4.62975	4.68998	5.26563	5.43065	5.22419	5.33469	4.64401	4.57281	4.61822	4.26398	4.62861	4.84342	4.62194	5.29777	6.40459	6.18893	6.41693	6.45511	6.48412	6.21748	6.23028	6.46027	6.48539	6.23238
0.396	5.62874	5.61486	5.69306	5.27779	4.62212	4.68248	5.26014	5.42567	5.21852	5.32936	4.64216	4.57292	4.61795	4.26588	4.62888	4.84088	4.62055	5.29209	6.39899	6.1826	6.41139	6.44969	6.47879	6.21123	6.22408	6.45485	6.48006	6.22618
0.397	5.62447	5.6105	5.68898	5.27238	4.61449	4.67498	5.25464	5.4207	5.21284	5.32404	4.6403	4.57301	4.61767	4.26776	4.62912	4.83833	4.61916	5.28641	6.3934	6.17626	6.40584	6.44428	6.47346	6.20499	6.21787	6.44943	6.47473	6.21997
0.398	5.62019	5.60614	5.6849	5.26697	4.60687	4.66748	5.24914	5.41572	5.20717	5.31871	4.63843	4.57308	4.61736	4.26963	4.62934	4.83578	4.61774	5.28073	6.38781	6.16993	6.40029	6.43886	6.46813	6.19874	6.21167	6.44402	6.4694	6.21377
0.399	5.61592	5.60177	5.68082	5.26155	4.59924	4.65998	5.24364	5.41074	5.2015	5.31339	4.63654	4.57312	4.61703	4.27149	4.62953	4.83321	4.61632	5.27505	6.38222	6.16359	6.39474	6.43344	6.4628	6.19249	6.20546	6.4386	6.46407	6.20756
0.4	5.61165	5.59741	5.67674	5.25614	4.59161	4.65247	5.23814	5.40577	5.19583	5.30806	4.63463	4.57315	4.61668	4.27333	4.6297	4.83064	4.61487	5.26937	6.37662	6.15726	6.38919	6.42803	6.45747	6.18624	6.19926	6.43318	6.45874	6.20136
0.401	5.60738	5.59304	5.67267	5.25073	4.58398	4.64497	5.23264	5.40079	5.19015	5.30273	4.63272	4.57316	4.61631	4.27515	4.62985	4.82806	4.61341	5.26369	6.37103	6.15092	6.38364	6.42261	6.45215	6.17999	6.19305	6.42776	6.45341	6.19515
0.402	5.60311	5.58868	5.66859	5.24532	4.57636	4.63747	5.22714	5.39581	5.18448	5.29741	4.63078	4.57314	4.61592	4.27696	4.62997	4.82547	4.61194	5.25801	6.36544	6.14458	6.37809	6.41719	6.44682	6.17374	6.18685	6.42235	6.44808	6.18895
0.403	5.59884	5.58432	5.66451	5.2399	4.56873	4.62997	5.22164	5.39084	5.17881	5.29208	4.62884	4.57311	4.61551	4.27876	4.63007	4.82288	4.61045	5.25233	6.35985	6.13825	6.37255	6.41177	6.44149	6.1675	6.18065	6.41693	6.44275	6.18274
0.404	5.59456	5.57995	5.66043	5.23449	4.5611	4.62247	5.21614	5.38586	5.17313	5.28676	4.62688	4.57305	4.61507	4.28054	4.63015	4.82028	4.60894	5.24665	6.35425	6.13191	6.367	6.40636	6.43616	6.16125	6.17444	6.41151	6.43743	6.17654
0.405	5.59029	5.57559	5.65635	5.22908	4.55347	4.61496	5.21064	5.38089	5.16746	5.28143	4.6249	4.57298	4.61462	4.2823	4.6302	4.81767	4.60742	5.24097	6.34866	6.12558	6.36145	6.40094	6.43083	6.155	6.16824	6.4061	6.4321	6.17033
0.406	5.58602	5.57122	5.65227	5.22367	4.54585	4.60746	5.20514	5.37591	5.16179	5.27611	4.62292	4.57288	4.61415	4.28405	4.63023	4.81505	4.60588	5.23529	6.34307	6.11924	6.3559	6.39552	6.4255	6.14875	6.16203	6.40068	6.42677	6.16413
0.407	5.58175	5.56686	5.64819	5.21825	4.53822	4.59996	5.19964	5.37093	5.15611	5.27078	4.62091	4.57277	4.61366	4.28579	4.63024	4.81242	4.60433	5.22961	6.33748	6.1129	6.35035	6.39011	6.42017	6.1425	6.15583	6.39526	6.42144	6.15792
0.408	5.57748	5.5625	5.64411	5.21284	4.53059	4.59246	5.19414	5.36596	5.15044	5.26546	4.6189	4.57263	4.61315	4.28751	4.63022	4.80979	4.60277	5.22393	6.33188	6.10657	6.3448	6.38469	6.41484	6.13625	6.14962	6.38984	6.41611	6.15172
0.409	5.5732	5.55813	5.64003	5.20743	4.52296	4.58496	5.18864	5.36098	5.14477	5.26013	4.61687	4.57247	4.61262	4.28921	4.63018	4.80715	4.60119	5.21825	6.32629	6.10023	6.33925	6.37927	6.40951	6.13001	6.14342	6.38443	6.41078	6.14551
0.41	5.56893	5.55377	5.63595	5.20202	4.51533	4.57745	5.18314	5.356	5.13909	5.25481	4.61483	4.5723	4.61207	4.2909	4.63012	4.8045	4.59959	5.21257	6.3207	6.0939	6.3337	6.37385	6.40418	6.12376	6.13721	6.37901	6.40545	6.13931
0.411	5.56466	5.54941	5.63187	5.1966	4.50771	4.56995	5.17765	5.35103	5.13342	5.24948	4.61278	4.5721	4.6115	4.29258	4.63003	4.80185	4.59799	5.20689	6.31511	6.08756	6.32816	6.36844	6.39885	6.11751	6.13101	6.37359	6.40012	6.1331
0.412	5.56039	5.54504	5.62779	5.19119	4.50008	4.56245	5.17215	5.34605	5.12775	5.24416	4.61071	4.57188	4.61091	4.29424	4.62992	4.79919	4.59636	5.20121	6.30951	6.08123	6.32261	6.36302	6.39352	6.11126	6.1248	6.36818	6.39479	6.1269
0.413	5.55612	5.54068	5.62371	5.18578	4.49245	4.55495	5.16665	5.34107	5.12207	5.23883	4.60863	4.57165	4.6103	4.29588	4.62979	4.79652	4.59473	5.19553	6.30392	6.07489	6.31706	6.3576	6.38819	6.10501	6.1186	6.36276	6.38946	6.12069
0.414	5.55184	5.53631	5.61964	5.18037	4.48482	4.54745	5.16115	5.3361	5.1164	5.23351	4.60654	4.57139	4.60968	4.29751	4.62964	4.79384	4.59307	5.18985	6.29833	6.06855	6.31151	6.35219	6.38286	6.09876	6.11239	6.35734	6.38413	6.11449
0.415	5.54757	5.53195	5.61556	5.17495	4.47719	4.53994	5.15565	5.33112	5.11073	5.22818	4.60443	4.57112	4.60903	4.29912	4.62946	4.79116	4.59141	5.18417	6.29274	6.06222	6.30596	6.34677	6.37753	6.09251	6.10619	6.35192	6.3788	6.10828
0.416	5.5433	5.52759	5.61148	5.16954	4.46957	4.53244	5.15015	5.32614	5.10506	5.22285	4.60231	4.57082	4.60837	4.30072	4.62926	4.78847	4.58973	5.17849	6.28714	6.05588	6.30041	6.34135	6.3722	6.08627	6.09998	6.34651	6.37347	6.10208
0.417	5.53903	5.52322	5.6074	5.16413	4.46194	4.52494	5.14465	5.32117	5.09938	5.21753	4.60018	4.57051	4.60768	4.3023	4.62904	4.78578	4.58804	5.17281	6.28155	6.04955	6.29486	6.33593	6.36687	6.08002	6.09378	6.34109	6.36814	6.09587
0.418	5.53476	5.51886	5.60332	5.15872	4.45431	4.51744	5.13915	5.31619	5.09371	5.2122	4.59804	4.57017	4.60698	4.30387	4.62879	4.78308	4.58633	5.16713	6.27596	6.04321	6.28932	6.33052	6.36154	6.07377	6.08757	6.33567	6.36281	6.08967
0.419	5.53048	5.51449	5.59924	5.1533	4.44668	4.50993	5.13365	5.31122	5.08804	5.20688	4.59589	4.56982	4.60626	4.30543	4.62853	4.78037	4.58461	5.16145	6.27037	6.03687	6.28377	6.3251	6.35621	6.06752	6.08137	6.33026	6.35748	6.08346
0.42	5.52621	5.51013	5.59516	5.14789	4.43905	4.50243	5.12815	5.30624	5.08236	5.20155	4.59372	4.56945	4.60552	4.30696	4.62824	4.77765	4.58288	5.15577	6.26477	6.03054	6.27822	6.31968	6.35089	6.06127	6.07516	6.32484	6.35215	6.07726
0.421	5.52194	5.50577	5.59108	5.14248	4.43143	4.49493	5.12265	5.30126	5.07669	5.19623	4.59154	4.56905	4.60476	4.30848	4.62793	4.77493	4.58113	5.15009	6.25918	6.0242	6.27267	6.31427	6.34556	6.05502	6.06896	6.31942	6.34683	6.07105
0.422	5.51767	5.5014	5.587	5.13707	4.4238	4.48743	5.11715	5.29629	5.07102	5.1909	4.58935	4.56864	4.60398	4.30999	4.6276	4.7722	4.57937	5.14441	6.25359	6.01787	6.26712	6.30885	6.34023	6.04877	6.06275	6.314	6.3415	6.06485
0.423	5.5134	5.49704	5.58292	5.13165	4.41617	4.47992	5.11165	5.29131	5.06534	5.18558	4.58715	4.56821	4.60319	4.31148	4.62725	4.76947	4.5776	5.13873	6.248	6.01153	6.26157	6.30343	6.3349	6.04253	6.05655	6.30859	6.33617	6.05864
0.424	5.50913	5.49267	5.57884	5.12624	4.40854	4.47242	5.10615	5.28633	5.05967	5.18025	4.58493	4.56776	4.60238	4.31296	4.62688	4.76673	4.57581	5.13305	6.2424	6.00519	6.25602	6.29801	6.32957	6.03628	6.05034	6.30317	6.33084	6.05243
0.425	5.50485	5.48831	5.57476	5.12083	4.40091	4.46492	5.10065	5.28136	5.054	5.17492	4.5827	4.5673	4.60155	4.31442	4.62648	4.76398	4.57401	5.12737	6.23681	5.99886	6.25047	6.2926	6.32424	6.03003	6.04414	6.29775	6.32551	6.04623
0.426	5.50058	5.48395	5.57068	5.11541	4.39328	4.45742	5.09515	5.27638	5.04832	5.1696	4.58047	4.56681	4.6007	4.31586	4.62606	4.76123	4.5722	5.12169	6.23122	5.99252	6.24493	6.28718	6.31891	6.02378	6.03793	6.29234	6.32018	6.04002
0.427	5.49631	5.47958	5.5666	5.11	4.38566	4.44991	5.08965	5.2714	5.04265	5.16427	4.57822	4.56631	4.59983	4.31729	4.62563	4.75847	4.57037	5.11601	6.22563	5.98619	6.23938	6.28176	6.31358	6.01753	6.03172	6.28692	6.31485	6.03382
0.428	5.49204	5.47522	5.56253	5.10459	4.37803	4.44241	5.08415	5.26643	5.03697	5.15895	4.57596	4.56578	4.59895	4.3187	4.62517	4.7557	4.56854	5.11033	6.22003	5.97985	6.23383	6.27634	6.30825	6.01128	6.02552	6.2815	6.30952	6.02761
0.429	5.48777	5.47085	5.55845	5.09918	4.3704	4.43491	5.07865	5.26145	5.0313	5.15362	4.57369	4.56524	4.59804	4.3201	4.62469	4.75293	4.56669	5.10465	6.21444	5.97351	6.22828	6.27093	6.30292	6.00503	6.01931	6.27608	6.30419	6.02141
0.43	5.48349	5.46649	5.55437	5.09376	4.36277	4.42741	5.07315	5.25647	5.02563	5.1483	4.5714	4.56468	4.59713	4.32148	4.62419	4.75015	4.56482	5.09897	6.20885	5.96718	6.22273	6.26551	6.29759	5.99879	6.01311	6.27067	6.29886	6.0152
0.431	5.47922	5.46213	5.55029	5.08835	4.35514	4.4199	5.06765	5.2515	5.01995	5.14297	4.56911	4.5641	4.59619	4.32285	4.62366	4.74737	4.56295	5.09329	6.20326	5.96084	6.21718	6.26009	6.29226	5.99254	6.0069	6.26525	6.29353	6.009
0.432	5.47495	5.45776	5.54621	5.08294	4.34751	4.4124	5.06215	5.24652	5.01428	5.13765	4.56681	4.56351	4.59523	4.3242	4.62312	4.74458	4.56106	5.08761	6.19766	5.95451	6.21163	6.25468	6.28693	5.98629	6.0007	6.25983	6.2882	6.00279
0.433	5.47068	5.4534	5.54213	5.07753	4.33988	4.4049	5.05665	5.24154	5.00861	5.13232	4.56449	4.56289	4.59426	4.32554	4.62256	4.74179	4.55916	5.08193	6.19207	5.94817	6.20608	6.24926	6.2816	5.98004	5.99449	6.25441	6.28287	5.99659
0.434	5.46641	5.44903	5.53805	5.07211	4.33226	4.39739	5.05115	5.23657	5.00293	5.12699	4.56216	4.56226	4.59327	4.32685	4.62197	4.73899	4.55725	5.07625	6.18648	5.94183	6.20054	6.24384	6.27627	5.97379	5.98829	6.249	6.27754	5.99038
0.435	5.46213	5.44467	5.53397	5.0667	4.32463	4.38989	5.04566	5.23159	4.99726	5.12167	4.55983	4.56161	4.59227	4.32816	4.62137	4.73619	4.55533	5.07057	6.18089	5.9355	6.19499	6.23842	6.27094	5.96754	5.98208	6.24358	6.27221	5.98418
0.436	5.45786	5.44031	5.52989	5.06129	4.317	4.38239	5.04016	5.22661	4.99159	5.11634	4.55748	4.56094	4.59125	4.32945	4.62075	4.73338	4.55339	5.06489	6.17529	5.92916	6.18944	6.23301	6.26561	5.96129	5.97588	6.23816	6.26688	5.97797
0.437	5.45359	5.43594	5.52581	5.05587	4.30937	4.37489	5.03466	5.22164	4.98591	5.11102	4.55512	4.56026	4.59021	4.33072	4.6201	4.73056	4.55145	5.05921	6.1697	5.92283	6.18389	6.22759	6.26028	5.95505	5.96967	6.23275	6.26155	5.97177
0.438	5.44932	5.43158	5.52173	5.05046	4.30174	4.36738	5.02916	5.21666	4.98024	5.10569	4.55276	4.55955	4.58915	4.33198	4.61944	4.72774	4.54949	5.05353	6.16411	5.91649	6.17834	6.22217	6.25495	5.9488	5.96347	6.22733	6.25622	5.96556
0.439	5.44505	5.42721	5.51765	5.04505	4.29411	4.35988	5.02366	5.21168	4.97457	5.10037	4.55038	4.55883	4.58808	4.33322	4.61876	4.72491	4.54752	5.04785	6.15852	5.91015	6.17279	6.21675	6.24962	5.94255	5.95726	6.22191	6.2509	5.95936
0.44	5.44077	5.42285	5.51357	5.03964	4.28648	4.35238	5.01816	5.20671	4.96889	5.09504	4.54799	4.55809	4.58699	4.33444	4.61805	4.72208	4.54554	5.04217	6.15292	5.90382	6.16724	6.21134	6.24429	5.9363	5.95106	6.21649	6.24557	5.95315
0.441	5.4365	5.41849	5.50949	5.03422	4.27885	4.34487	5.01266	5.20173	4.96322	5.08971	4.54559	4.55734	4.58589	4.33565	4.61733	4.71924	4.54354	5.03649	6.14733	5.89748	6.16169	6.20592	6.23896	5.93005	5.94485	6.21108	6.24024	5.94694
0.442	5.43223	5.41412	5.50541	5.02881	4.27123	4.33737	5.00716	5.19675	4.95755	5.08439	4.54318	4.55656	4.58476	4.33684	4.61658	4.7164	4.54154	5.03081	6.14174	5.89115	6.15615	6.2005	6.23363	5.9238	5.93865	6.20566	6.23491	5.94074
0.443	5.42796	5.40976	5.50134	5.0234	4.2636	4.32987	5.00166	5.19178	4.95187	5.07906	4.54076	4.55577	4.58363	4.33802	4.61582	4.71356	4.53952	5.02513	6.13614	5.88481	6.1506	6.19509	6.22831	5.91755	5.93244	6.20024	6.22958	5.93453
0.444	5.42369	5.4054	5.49726	5.01798	4.25597	4.32236	4.99616	5.1868	4.9462	5.07374	4.53834	4.55497	4.58247	4.33918	4.61504	4.7107	4.53749	5.01945	6.13055	5.87847	6.14505	6.18967	6.22298	5.9113	5.92624	6.19482	6.22425	5.92833
0.445	5.41941	5.40103	5.49318	5.01257	4.24834	4.31486	4.99066	5.18182	4.94052	5.06841	4.5359	4.55414	4.5813	4.34033	4.61424	4.70785	4.53546	5.01377	6.12496	5.87214	6.1395	6.18425	6.21765	5.90506	5.92003	6.18941	6.21892	5.92212
0.446	5.41514	5.39667	5.4891	5.00716	4.24071	4.30736	4.98516	5.17685	4.93485	5.06309	4.53345	4.5533	4.58012	4.34146	4.61342	4.70498	4.53341	5.00809	6.11937	5.8658	6.13395	6.17883	6.21232	5.89881	5.91383	6.18399	6.21359	5.91592
0.447	5.41087	5.3923	5.48502	5.00175	4.23308	4.29986	4.97966	5.17187	4.92918	5.05776	4.531	4.55244	4.57892	4.34257	4.61258	4.70212	4.53135	5.00241	6.11377	5.85946	6.1284	6.17342	6.20699	5.89256	5.90762	6.17857	6.20826	5.90971
0.448	5.4066	5.38794	5.48094	4.99633	4.22545	4.29235	4.97416	5.16689	4.9235	5.05243	4.52853	4.55157	4.5777	4.34367	4.61172	4.69925	4.52928	4.99673	6.10818	5.85313	6.12285	6.168	6.20166	5.88631	5.90142	6.17316	6.20293	5.90351
0.449	5.40233	5.38358	5.47686	4.99092	4.21782	4.28485	4.96866	5.16192	4.91783	5.04711	4.52605	4.55068	4.57647	4.34475	4.61085	4.69637	4.5272	4.99105	6.10259	5.84679	6.1173	6.16258	6.19633	5.88006	5.89521	6.16774	6.1976	5.8973
0.45	5.39805	5.37921	5.47278	4.98551	4.2102	4.27735	4.96316	5.15694	4.91216	5.04178	4.52357	4.54977	4.57522	4.34582	4.60995	4.69349	4.5251	4.98537	6.097	5.84046	6.11175	6.15716	6.191	5.87381	5.88901	6.16232	6.19227	5.8911
0.451	5.39378	5.37485	5.4687	4.98009	4.20257	4.26984	4.95766	5.15196	4.90648	5.03646	4.52107	4.54884	4.57396	4.34687	4.60904	4.6906	4.523	4.97969	6.0914	5.83412	6.10621	6.15175	6.18567	5.86756	5.8828	6.1569	6.18694	5.88489
0.452	5.38951	5.37048	5.46462	4.97468	4.19494	4.26234	4.95216	5.14699	4.90081	5.03113	4.51857	4.5479	4.57268	4.34791	4.6081	4.68771	4.52089	4.97401	6.08581	5.82778	6.10066	6.14633	6.18034	5.86131	5.8766	6.15149	6.18161	5.87869
0.453	5.38524	5.36612	5.46054	4.96927	4.18731	4.25484	4.94666	5.14201	4.89514	5.02581	4.51606	4.54694	4.57138	4.34893	4.60715	4.68482	4.51876	4.96833	6.08022	5.82145	6.09511	6.14091	6.17501	5.85507	5.87039	6.14607	6.17628	5.87248
0.454	5.38097	5.36176	5.45646	4.96386	4.17968	4.24733	4.94116	5.13703	4.88946	5.02048	4.51354	4.54597	4.57007	4.34993	4.60618	4.68192	4.51663	4.96265	6.07463	5.81511	6.08956	6.1355	6.16968	5.84882	5.86418	6.14065	6.17095	5.86627
0.455	5.37669	5.35739	5.45238	4.95844	4.17205	4.23983	4.93566	5.13206	4.88379	5.01515	4.51101	4.54498	4.56875	4.35092	4.6052	4.67901	4.51449	4.95697	6.06903	5.80878	6.08401	6.13008	6.16435	5.84257	5.85798	6.13523	6.16562	5.86007
0.456	5.37242	5.35303	5.4483	4.95303	4.16442	4.23233	4.93016	5.12708	4.87811	5.00983	4.50847	4.54398	4.56741	4.35189	4.60419	4.6761	4.51233	4.95129	6.06344	5.80244	6.07846	6.12466	6.15902	5.83632	5.85177	6.12982	6.16029	5.85386
0.457	5.36815	5.34866	5.44422	4.94762	4.15679	4.22482	4.92466	5.1221	4.87244	5.0045	4.50592	4.54296	4.56606	4.35284	4.60317	4.67319	4.51017	4.94561	6.05785	5.7961	6.07291	6.11924	6.15369	5.83007	5.84557	6.1244	6.15496	5.84766
0.458	5.36388	5.3443	5.44015	4.9422	4.14916	4.21732	4.91916	5.11713	4.86677	4.99918	4.50336	4.54192	4.56469	4.35378	4.60213	4.67027	4.508	4.93993	6.05225	5.78977	6.06736	6.11383	6.14836	5.82382	5.83936	6.11898	6.14963	5.84145
0.459	5.35961	5.33993	5.43607	4.93679	4.14153	4.20982	4.91366	5.11215	4.86109	4.99385	4.5008	4.54087	4.56331	4.35471	4.60107	4.66735	4.50581	4.93425	6.04666	5.78343	6.06182	6.10841	6.14303	5.81757	5.83316	6.11357	6.14431	5.83525
0.46	5.35533	5.33557	5.43199	4.93138	4.13391	4.20231	4.90816	5.10717	4.85542	4.98852	4.49823	4.5398	4.56191	4.35562	4.59999	4.66443	4.50362	4.92857	6.04107	5.77709	6.05627	6.10299	6.1377	5.81132	5.82695	6.10815	6.13898	5.82904
0.461	5.35106	5.33121	5.42791	4.92596	4.12628	4.19481	4.90266	5.1022	4.84975	4.9832	4.49564	4.53871	4.5605	4.35651	4.5989	4.6615	4.50141	4.92289	6.03548	5.77076	6.05072	6.09757	6.13237	5.80508	5.82075	6.10273	6.13365	5.82284
0.462	5.34679	5.32684	5.42383	4.92055	4.11865	4.18731	4.89716	5.09722	4.84407	4.97787	4.49305	4.53761	4.55907	4.35738	4.59779	4.65856	4.4992	4.91721	6.02988	5.76442	6.04517	6.09216	6.12704	5.79883	5.81454	6.09731	6.12832	5.81663
0.463	5.34252	5.32248	5.41975	4.91514	4.11102	4.1798	4.89166	5.09224	4.8384	4.97255	4.49046	4.5365	4.55763	4.35824	4.59666	4.65562	4.49698	4.91152	6.02429	5.75809	6.03962	6.08674	6.12171	5.79258	5.80834	6.0919	6.12299	5.81043
0.464	5.33825	5.31811	5.41567	4.90973	4.10339	4.1723	4.88616	5.08727	4.83272	4.96722	4.48785	4.53537	4.55618	4.35909	4.59552	4.65268	4.49475	4.90584	6.0187	5.75175	6.03407	6.08132	6.11638	5.78633	5.80213	6.08648	6.11766	5.80422
0.465	5.33397	5.31375	5.41159	4.90431	4.09576	4.1648	4.88066	5.08229	4.82705	4.9619	4.48523	4.53422	4.55471	4.35992	4.59435	4.64973	4.4925	4.90016	6.01311	5.74541	6.02852	6.0759	6.11105	5.78008	5.79593	6.08106	6.11233	5.79801
0.466	5.3297	5.30939	5.40751	4.8989	4.08813	4.15729	4.87516	5.07731	4.82138	4.95657	4.48261	4.53306	4.55323	4.36073	4.59318	4.64678	4.49025	4.89448	6.00751	5.73908	6.02297	6.07049	6.10572	5.77383	5.78972	6.07564	6.107	5.79181
0.467	5.32543	5.30502	5.40343	4.89349	4.0805	4.14979	4.86966	5.07234	4.8157	4.95124	4.47998	4.53189	4.55173	4.36153	4.59198	4.64383	4.48799	4.8888	6.00192	5.73274	6.01742	6.06507	6.10039	5.76758	5.78352	6.07023	6.10167	5.7856
0.468	5.32116	5.30066	5.39935	4.88807	4.07287	4.14229	4.86416	5.06736	4.81003	4.94592	4.47734	4.5307	4.55022	4.36231	4.59077	4.64087	4.48572	4.88312	5.99633	5.7264	6.01188	6.05965	6.09506	5.76133	5.77731	6.06481	6.09634	5.7794
0.469	5.31689	5.29629	5.39527	4.88266	4.06524	4.13478	4.85866	5.06238	4.80436	4.94059	4.4747	4.52949	4.5487	4.36307	4.58954	4.63791	4.48345	4.87744	5.99074	5.72007	6.00633	6.05424	6.08974	5.75509	5.77111	6.05939	6.09101	5.77319
0.47	5.31261	5.29193	5.39119	4.87725	4.05761	4.12728	4.85316	5.05741	4.79868	4.93527	4.47204	4.52827	4.54716	4.36382	4.58829	4.63494	4.48116	4.87176	5.98514	5.71373	6.00078	6.04882	6.08441	5.74884	5.7649	6.05397	6.08568	5.76699
0.471	5.30834	5.28757	5.38711	4.87183	4.04999	4.11978	4.84766	5.05243	4.79301	4.92994	4.46938	4.52704	4.54561	4.36456	4.58703	4.63197	4.47886	4.86608	5.97955	5.7074	5.99523	6.0434	6.07908	5.74259	5.75869	6.04856	6.08035	5.76078
0.472	5.30407	5.2832	5.38303	4.86642	4.04236	4.11227	4.84216	5.04745	4.78733	4.92461	4.46671	4.52579	4.54405	4.36527	4.58575	4.629	4.47656	4.8604	5.97396	5.70106	5.98968	6.03798	6.07375	5.73634	5.75249	6.04314	6.07502	5.75458
0.473	5.2998	5.27884	5.37895	4.86101	4.03473	4.10477	4.83666	5.04248	4.78166	4.91929	4.46403	4.52452	4.54247	4.36597	4.58446	4.62602	4.47424	4.85472	5.96836	5.69472	5.98413	6.03257	6.06842	5.73009	5.74628	6.03772	6.06969	5.74837
0.474	5.29553	5.27447	5.37488	4.8556	4.0271	4.09727	4.83116	5.0375	4.77599	4.91396	4.46135	4.52325	4.54088	4.36666	4.58315	4.62304	4.47192	4.84904	5.96277	5.68839	5.97858	6.02715	6.06309	5.72384	5.74008	6.0323	6.06436	5.74216
0.475	5.29125	5.27011	5.3708	4.85018	4.01947	4.08976	4.82566	5.03252	4.77031	4.90864	4.45866	4.52195	4.53928	4.36733	4.58182	4.62005	4.46959	4.84336	5.95718	5.68205	5.97303	6.02173	6.05776	5.71759	5.73387	6.02689	6.05903	5.73596
0.476	5.28698	5.26575	5.36672	4.84477	4.01184	4.08226	4.82016	5.02755	4.76464	4.90331	4.45596	4.52065	4.53766	4.36799	4.58048	4.61706	4.46725	4.83768	5.95159	5.67571	5.96748	6.01631	6.05243	5.71134	5.72767	6.02147	6.0537	5.72975
0.477	5.28271	5.26138	5.36264	4.83936	4.00421	4.07476	4.81466	5.02257	4.75896	4.89799	4.45325	4.51933	4.53603	4.36862	4.57912	4.61407	4.4649	4.832	5.94599	5.66938	5.96194	6.0109	6.0471	5.70509	5.72146	6.01605	6.04837	5.72355
0.478	5.27844	5.25702	5.35856	4.83394	3.99658	4.06725	4.80916	5.01759	4.75329	4.89266	4.45054	4.51799	4.53439	4.36925	4.57775	4.61107	4.46254	4.82632	5.9404	5.66304	5.95639	6.00548	6.04177	5.69885	5.71526	6.01064	6.04304	5.71734
0.479	5.27416	5.25265	5.35448	4.82853	3.98895	4.05975	4.80366	5.01262	4.74762	4.88733	4.44782	4.51664	4.53274	4.36985	4.57636	4.60807	4.46018	4.82064	5.93481	5.65671	5.95084	6.00006	6.03644	5.6926	5.70905	6.00522	6.03771	5.71114
0.48	5.26989	5.24829	5.3504	4.82312	3.98132	4.05224	4.79816	5.00764	4.74194	4.88201	4.44509	4.51528	4.53107	4.37045	4.57496	4.60507	4.4578	4.81496	5.92922	5.65037	5.94529	5.99464	6.03111	5.68635	5.70285	5.9998	6.03238	5.70493
0.481	5.26562	5.24393	5.34632	4.8177	3.97369	4.04474	4.79266	5.00266	4.73627	4.87668	4.44235	4.51391	4.52939	4.37102	4.57354	4.60206	4.45542	4.80928	5.92362	5.64403	5.93974	5.98923	6.02578	5.6801	5.69664	5.99438	6.02705	5.69873
0.482	5.26135	5.23956	5.34224	4.81229	3.96606	4.03724	4.78716	4.99769	4.7306	4.87136	4.43961	4.51252	4.5277	4.37158	4.5721	4.59906	4.45303	4.8036	5.91803	5.6377	5.93419	5.98381	6.02045	5.67385	5.69044	5.98897	6.02173	5.69252
0.483	5.25708	5.2352	5.33816	4.80688	3.95843	4.02973	4.78166	4.99271	4.72492	4.86603	4.43686	4.51111	4.52599	4.37212	4.57065	4.59604	4.45063	4.79792	5.91244	5.63136	5.92864	5.97839	6.01512	5.6676	5.68423	5.98355	6.0164	5.68632
0.484	5.2528	5.23083	5.33408	4.80146	3.9508	4.02223	4.77616	4.98773	4.71925	4.8607	4.43411	4.50969	4.52428	4.37265	4.56919	4.59303	4.44822	4.79224	5.90684	5.62502	5.92309	5.97298	6.00979	5.66135	5.67803	5.97813	6.01107	5.68011
0.485	5.24853	5.22647	5.33	4.79605	3.94318	4.01473	4.77066	4.98275	4.71357	4.85538	4.43134	4.50826	4.52255	4.37317	4.56771	4.59001	4.44581	4.78656	5.90125	5.61869	5.91754	5.96756	6.00446	5.6551	5.67182	5.97271	6.00574	5.6739
0.486	5.24426	5.22211	5.32592	4.79064	3.93555	4.00722	4.76516	4.97778	4.7079	4.85005	4.42857	4.50682	4.52081	4.37366	4.56621	4.58698	4.44339	4.78088	5.89566	5.61235	5.912	5.96214	5.99913	5.64885	5.66561	5.9673	6.00041	5.6677
0.487	5.23999	5.21774	5.32184	4.78523	3.92792	3.99972	4.75966	4.9728	4.70223	4.84473	4.4258	4.50536	4.51905	4.37414	4.56471	4.58396	4.44096	4.7752	5.89007	5.60602	5.90645	5.95672	5.9938	5.64261	5.65941	5.96188	5.99508	5.66149
0.488	5.23572	5.21338	5.31776	4.77981	3.92029	3.99222	4.75416	4.96782	4.69655	4.8394	4.42301	4.50389	4.51729	4.37461	4.56318	4.58093	4.43852	4.76952	5.88447	5.59968	5.9009	5.95131	5.98847	5.63636	5.6532	5.95646	5.98975	5.65529
0.489	5.23144	5.20901	5.31368	4.7744	3.91266	3.98471	4.74866	4.96285	4.69088	4.83407	4.42023	4.50241	4.51551	4.37506	4.56164	4.57789	4.43607	4.76384	5.87888	5.59334	5.89535	5.94589	5.98314	5.63011	5.647	5.95104	5.98442	5.64908
0.49	5.22717	5.20465	5.3096	4.76899	3.90503	3.97721	4.74316	4.95787	4.6852	4.82875	4.41743	4.50091	4.51372	4.3755	4.56009	4.57486	4.43362	4.75816	5.87329	5.58701	5.8898	5.94047	5.97781	5.62386	5.64079	5.94563	5.97909	5.64288
0.491	5.2229	5.20029	5.30553	4.76357	3.8974	3.96971	4.73766	4.95289	4.67953	4.82342	4.41463	4.49941	4.51192	4.37591	4.55853	4.57182	4.43116	4.75248	5.8677	5.58067	5.88425	5.93505	5.97248	5.61761	5.63459	5.94021	5.97376	5.63667
0.492	5.21863	5.19592	5.30145	4.75816	3.88977	3.9622	4.73216	4.94792	4.67386	4.8181	4.41182	4.49788	4.51011	4.37632	4.55694	4.56877	4.42869	4.7468	5.8621	5.57433	5.8787	5.92964	5.96715	5.61136	5.62838	5.93479	5.96843	5.63047
0.493	5.21436	5.19156	5.29737	4.75275	3.88214	3.9547	4.72666	4.94294	4.66818	4.81277	4.409	4.49635	4.50829	4.37671	4.55535	4.56573	4.42621	4.74112	5.85651	5.568	5.87315	5.92422	5.96182	5.60511	5.62218	5.92937	5.9631	5.62426
0.494	5.21008	5.18719	5.29329	4.74733	3.87451	3.94719	4.72116	4.93796	4.66251	4.80744	4.40618	4.4948	4.50645	4.37708	4.55374	4.56268	4.42373	4.73544	5.85092	5.56166	5.8676	5.9188	5.95649	5.59886	5.61597	5.92396	5.95777	5.61805
0.495	5.20581	5.18283	5.28921	4.74192	3.86688	3.93969	4.71566	4.93299	4.65683	4.80212	4.40336	4.49324	4.50461	4.37744	4.55212	4.55963	4.42124	4.72976	5.84532	5.55532	5.86206	5.91338	5.95116	5.59261	5.60977	5.91854	5.95244	5.61185
0.496	5.20154	5.17846	5.28513	4.73651	3.85925	3.93219	4.71016	4.92801	4.65116	4.79679	4.40052	4.49167	4.50275	4.37778	4.55048	4.55657	4.41874	4.72408	5.83973	5.54899	5.85651	5.90797	5.94583	5.58637	5.60356	5.91312	5.94711	5.60564
0.497	5.19727	5.1741	5.28105	4.73109	3.85162	3.92468	4.70466	4.92303	4.64549	4.79147	4.39768	4.49008	4.50088	4.3781	4.54883	4.55352	4.41623	4.7184	5.83414	5.54265	5.85096	5.90255	5.9405	5.58012	5.59736	5.90771	5.94178	5.59944
0.498	5.193	5.16974	5.27697	4.72568	3.84399	3.91718	4.69916	4.91806	4.63981	4.78614	4.39484	4.48849	4.499	4.37842	4.54717	4.55046	4.41372	4.71272	5.82855	5.53632	5.84541	5.89713	5.93517	5.57387	5.59115	5.90229	5.93645	5.59323
0.499	5.18872	5.16537	5.27289	4.72027	3.83636	3.90968	4.69366	4.91308	4.63414	4.78081	4.39199	4.48688	4.49711	4.37871	4.54549	4.54739	4.4112	4.70704	5.82295	5.52998	5.83986	5.89171	5.92985	5.56762	5.58494	5.89687	5.93112	5.58703
0.5	5.18445	5.16101	5.26881	4.71485	3.82873	3.90217	4.68816	4.9081	4.62846	4.77549	4.38913	4.48526	4.49521	4.37899	4.5438	4.54433	4.40867	4.70136	5.81736	5.52364	5.83431	5.8863	5.92452	5.56137	5.57874	5.89145	5.92579	5.58082
0.501	5.18018	5.15664	5.26473	4.70944	3.82111	3.89467	4.68266	4.90313	4.62279	4.77016	4.38626	4.48362	4.4933	4.37926	4.5421	4.54126	4.40614	4.69568	5.81177	5.51731	5.82876	5.88088	5.91919	5.55512	5.57253	5.88604	5.92046	5.57461
0.502	5.17591	5.15228	5.26065	4.70403	3.81348	3.88716	4.67716	4.89815	4.61712	4.76484	4.3834	4.48198	4.49137	4.37951	4.54038	4.53818	4.4036	4.69	5.80618	5.51097	5.82321	5.87546	5.91386	5.54887	5.56633	5.88062	5.91513	5.56841
0.503	5.17163	5.14792	5.25657	4.69861	3.80585	3.87966	4.67166	4.89317	4.61144	4.75951	4.38052	4.48032	4.48944	4.37974	4.53865	4.53511	4.40105	4.68432	5.80058	5.50463	5.81766	5.87004	5.90853	5.54262	5.56012	5.8752	5.9098	5.5622
0.504	5.16736	5.14355	5.25249	4.6932	3.79822	3.87216	4.66616	4.8882	4.60577	4.75418	4.37764	4.47865	4.4875	4.37996	4.53691	4.53203	4.3985	4.67864	5.79499	5.4983	5.81212	5.86463	5.9032	5.53637	5.55392	5.86978	5.90447	5.556
0.505	5.16309	5.13919	5.24841	4.68779	3.79059	3.86465	4.66066	4.88322	4.60009	4.74886	4.37475	4.47697	4.48554	4.38016	4.53515	4.52895	4.39594	4.67296	5.7894	5.49196	5.80657	5.85921	5.89787	5.53013	5.54771	5.86437	5.89914	5.54979
0.506	5.15882	5.13482	5.24433	4.68238	3.78296	3.85715	4.65516	4.87824	4.59442	4.74353	4.37186	4.47528	4.48358	4.38035	4.53339	4.52587	4.39337	4.66728	5.7838	5.48562	5.80102	5.85379	5.89254	5.52388	5.54151	5.85895	5.89381	5.54359
0.507	5.15455	5.13046	5.24026	4.67696	3.77533	3.84965	4.64966	4.87326	4.58875	4.73821	4.36896	4.47357	4.4816	4.38052	4.5316	4.52278	4.39079	4.6616	5.77821	5.47929	5.79547	5.84838	5.88721	5.51763	5.5353	5.85353	5.88849	5.53738
0.508	5.15027	5.1261	5.23618	4.67155	3.7677	3.84214	4.64416	4.86829	4.58307	4.73288	4.36606	4.47186	4.47962	4.38068	4.52981	4.51969	4.38821	4.65592	5.77262	5.47295	5.78992	5.84296	5.88188	5.51138	5.5291	5.84811	5.88316	5.53118
0.509	5.146	5.12173	5.2321	4.66614	3.76007	3.83464	4.63866	4.86331	4.5774	4.72755	4.36315	4.47013	4.47762	4.38083	4.528	4.5166	4.38562	4.65024	5.76703	5.46662	5.78437	5.83754	5.87655	5.50513	5.52289	5.8427	5.87783	5.52497
0.51	5.14173	5.11737	5.22802	4.66072	3.75244	3.82713	4.63316	4.85833	4.57172	4.72223	4.36024	4.46839	4.47561	4.38095	4.52619	4.51351	4.38303	4.64456	5.76143	5.46028	5.77882	5.83212	5.87122	5.49888	5.51668	5.83728	5.8725	5.51876
0.511	5.13746	5.113	5.22394	4.65531	3.74481	3.81963	4.62766	4.85336	4.56605	4.7169	4.35732	4.46664	4.4736	4.38107	4.52435	4.51041	4.38043	4.63888	5.75584	5.45394	5.77327	5.82671	5.86589	5.49263	5.51048	5.83186	5.86717	5.51256
0.512	5.13319	5.10864	5.21986	4.6499	3.73718	3.81213	4.62216	4.84838	4.56038	4.71158	4.35439	4.46488	4.47157	4.38116	4.52251	4.50731	4.37782	4.6332	5.75025	5.44761	5.76772	5.82129	5.86056	5.48638	5.50427	5.82644	5.86184	5.50635
0.513	5.12891	5.10428	5.21578	4.64448	3.72955	3.80462	4.61666	4.8434	4.5547	4.70625	4.35146	4.46311	4.46953	4.38125	4.52066	4.50421	4.37521	4.62752	5.74465	5.44127	5.76217	5.81587	5.85523	5.48013	5.49807	5.82103	5.85651	5.50015
0.514	5.12464	5.09991	5.2117	4.63907	3.72192	3.79712	4.61116	4.83843	4.54903	4.70092	4.34853	4.46132	4.46749	4.38132	4.51879	4.50111	4.37259	4.62184	5.73906	5.43493	5.75663	5.81045	5.8499	5.47388	5.49186	5.81561	5.85118	5.49394
0.515	5.12037	5.09555	5.20762	4.63366	3.71429	3.78961	4.60566	4.83345	4.54335	4.6956	4.34559	4.45953	4.46543	4.38137	4.51691	4.498	4.36996	4.61616	5.73347	5.4286	5.75108	5.80504	5.84457	5.46764	5.48566	5.81019	5.84585	5.48774
0.516	5.1161	5.09118	5.20354	4.62824	3.70666	3.78211	4.60016	4.82847	4.53768	4.69027	4.34264	4.45773	4.46337	4.38141	4.51502	4.49489	4.36733	4.61048	5.72788	5.42226	5.74553	5.79962	5.83924	5.46139	5.47945	5.80477	5.84052	5.48153
0.517	5.11183	5.08682	5.19946	4.62283	3.69903	3.77461	4.59466	4.8235	4.53201	4.68495	4.33969	4.45591	4.46129	4.38143	4.51312	4.49178	4.36469	4.6048	5.72228	5.41592	5.73998	5.7942	5.83391	5.45514	5.47325	5.79936	5.83519	5.47533
0.518	5.10755	5.08245	5.19538	4.61742	3.6914	3.7671	4.58916	4.81852	4.52633	4.67962	4.33674	4.45408	4.45921	4.38144	4.5112	4.48867	4.36205	4.59912	5.71669	5.40959	5.73443	5.78878	5.82858	5.44889	5.46704	5.79394	5.82986	5.46912
0.519	5.10328	5.07809	5.1913	4.612	3.68377	3.7596	4.58365	4.81354	4.52066	4.67429	4.33377	4.45224	4.45711	4.38143	4.50927	4.48555	4.3594	4.59344	5.7111	5.40325	5.72888	5.78337	5.82325	5.44264	5.46084	5.78852	5.82453	5.46291
0.52	5.09901	5.07373	5.18722	4.60659	3.67614	3.7521	4.57815	4.80857	4.51498	4.66897	4.33081	4.4504	4.45501	4.38141	4.50734	4.48243	4.35674	4.58776	5.70551	5.39692	5.72333	5.77795	5.81792	5.43639	5.45463	5.78311	5.8192	5.45671
0.521	5.09474	5.06936	5.18314	4.60118	3.66851	3.74459	4.57265	4.80359	4.50931	4.66364	4.32784	4.44854	4.4529	4.38138	4.50539	4.47931	4.35408	4.58207	5.69991	5.39058	5.71778	5.77253	5.81259	5.43014	5.44842	5.77769	5.81387	5.4505
0.522	5.09047	5.065	5.17906	4.59576	3.66089	3.73709	4.56715	4.79861	4.50364	4.65831	4.32486	4.44667	4.45077	4.38133	4.50343	4.47619	4.35141	4.57639	5.69432	5.38424	5.71223	5.76711	5.80726	5.42389	5.44222	5.77227	5.80854	5.4443
0.523	5.08619	5.06063	5.17498	4.59035	3.65326	3.72958	4.56165	4.79363	4.49796	4.65299	4.32188	4.44479	4.44864	4.38126	4.50146	4.47306	4.34873	4.57071	5.68873	5.37791	5.70669	5.7617	5.80193	5.41764	5.43601	5.76685	5.80321	5.43809
0.524	5.08192	5.05627	5.17091	4.58494	3.64563	3.72208	4.55615	4.78866	4.49229	4.64766	4.3189	4.4429	4.4465	4.38118	4.49947	4.46994	4.34605	4.56503	5.68313	5.37157	5.70114	5.75628	5.7966	5.41139	5.42981	5.76144	5.79788	5.43189
0.525	5.07765	5.05191	5.16683	4.57952	3.638	3.71458	4.55065	4.78368	4.48661	4.64234	4.31591	4.441	4.44435	4.38109	4.49748	4.46681	4.34337	4.55935	5.67754	5.36523	5.69559	5.75086	5.79127	5.40515	5.4236	5.75602	5.79255	5.42568
0.526	5.07338	5.04754	5.16275	4.57411	3.63037	3.70707	4.54515	4.7787	4.48094	4.63701	4.31291	4.43909	4.44219	4.38098	4.49547	4.46367	4.34068	4.55367	5.67195	5.3589	5.69004	5.74544	5.78594	5.3989	5.4174	5.7506	5.78722	5.41947
0.527	5.0691	5.04318	5.15867	4.5687	3.62274	3.69957	4.53965	4.77373	4.47526	4.63168	4.30991	4.43717	4.44003	4.38085	4.49346	4.46054	4.33798	4.54799	5.66636	5.35256	5.68449	5.74003	5.78061	5.39265	5.41119	5.74518	5.78189	5.41327
0.528	5.06483	5.03881	5.15459	4.56328	3.61511	3.69206	4.53415	4.76875	4.46959	4.62636	4.30691	4.43524	4.43785	4.38072	4.49143	4.4574	4.33528	4.54231	5.66076	5.34622	5.67894	5.73461	5.77528	5.3864	5.40499	5.73977	5.77656	5.40706
0.529	5.06056	5.03445	5.15051	4.55787	3.60748	3.68456	4.52865	4.76377	4.46392	4.62103	4.3039	4.4333	4.43566	4.38056	4.48939	4.45426	4.33257	4.53663	5.65517	5.33989	5.67339	5.72919	5.76995	5.38015	5.39878	5.73435	5.77123	5.40086
0.53	5.05629	5.03009	5.14643	4.55246	3.59985	3.67706	4.52315	4.7588	4.45824	4.61571	4.30089	4.43135	4.43347	4.3804	4.48735	4.45112	4.32986	4.53095	5.64958	5.33355	5.66784	5.72377	5.76462	5.3739	5.39258	5.72893	5.7659	5.39465
0.531	5.05202	5.02572	5.14235	4.54704	3.59222	3.66955	4.51765	4.75382	4.45257	4.61038	4.29787	4.42939	4.43127	4.38022	4.48529	4.44798	4.32714	4.52527	5.64398	5.32721	5.66229	5.71836	5.75929	5.36765	5.38637	5.72351	5.76057	5.38845
0.532	5.04774	5.02136	5.13827	4.54163	3.58459	3.66205	4.51215	4.74884	4.44689	4.60505	4.29485	4.42742	4.42906	4.38002	4.48322	4.44483	4.32441	4.51959	5.63839	5.32088	5.65674	5.71294	5.75396	5.3614	5.38016	5.7181	5.75524	5.38224
0.533	5.04347	5.01699	5.13419	4.53622	3.57696	3.65454	4.50665	4.74387	4.44122	4.59973	4.29182	4.42544	4.42684	4.37981	4.48114	4.44168	4.32168	4.51391	5.6328	5.31454	5.6512	5.70752	5.74864	5.35515	5.37396	5.71268	5.74991	5.37604
0.534	5.0392	5.01263	5.13011	4.5308	3.56933	3.64704	4.50115	4.73889	4.43555	4.5944	4.28879	4.42345	4.42461	4.37959	4.47905	4.43853	4.31895	4.50823	5.62721	5.30821	5.64565	5.70211	5.74331	5.3489	5.36775	5.70726	5.74459	5.36983
0.535	5.03493	5.00826	5.12603	4.52539	3.5617	3.63954	4.49565	4.73391	4.42987	4.58908	4.28576	4.42145	4.42237	4.37935	4.47695	4.43538	4.31621	4.50255	5.62161	5.30187	5.6401	5.69669	5.73798	5.34266	5.36155	5.70184	5.73926	5.36362
0.536	5.03066	5.0039	5.12195	4.51998	3.55407	3.63203	4.49015	4.72893	4.4242	4.58375	4.28272	4.41944	4.42013	4.3791	4.47484	4.43223	4.31346	4.49687	5.61602	5.29553	5.63455	5.69127	5.73265	5.33641	5.35534	5.69643	5.73393	5.35742
0.537	5.02638	4.99954	5.11787	4.51456	3.54644	3.62453	4.48465	4.72396	4.41852	4.57842	4.27967	4.41743	4.41787	4.37883	4.47272	4.42907	4.31071	4.49119	5.61043	5.2892	5.629	5.68585	5.72732	5.33016	5.34914	5.69101	5.7286	5.35121
0.538	5.02211	4.99517	5.11379	4.50915	3.53881	3.61702	4.47915	4.71898	4.41285	4.5731	4.27662	4.4154	4.41561	4.37855	4.47059	4.42591	4.30795	4.48551	5.60484	5.28286	5.62345	5.68044	5.72199	5.32391	5.34293	5.68559	5.72327	5.34501
0.539	5.01784	4.99081	5.10971	4.50374	3.53118	3.60952	4.47365	4.714	4.40718	4.56777	4.27357	4.41336	4.41334	4.37826	4.46845	4.42275	4.30519	4.47983	5.59924	5.27652	5.6179	5.67502	5.71666	5.31766	5.33673	5.68017	5.71794	5.3388
0.54	5.01357	4.98644	5.10563	4.49832	3.52355	3.60202	4.46815	4.70903	4.4015	4.56244	4.27052	4.41132	4.41107	4.37795	4.4663	4.41959	4.30242	4.47415	5.59365	5.27019	5.61235	5.6696	5.71133	5.31141	5.33052	5.67476	5.71261	5.3326
0.541	5.00929	4.98208	5.10155	4.49291	3.51592	3.59451	4.46265	4.70405	4.39583	4.55712	4.26746	4.40926	4.40878	4.37762	4.46414	4.41643	4.29965	4.46847	5.58806	5.26385	5.6068	5.66418	5.706	5.30516	5.32432	5.66934	5.70728	5.32639
0.542	5.00502	4.97772	5.09748	4.4875	3.50829	3.58701	4.45715	4.69907	4.39015	4.55179	4.26439	4.4072	4.40649	4.37729	4.46197	4.41326	4.29688	4.46279	5.58246	5.25751	5.60126	5.65877	5.70067	5.29891	5.31811	5.66392	5.70195	5.32018
0.543	5.00075	4.97335	5.0934	4.48209	3.50066	3.5795	4.45165	4.6941	4.38448	4.54647	4.26132	4.40513	4.40419	4.37694	4.45979	4.41009	4.2941	4.45711	5.57687	5.25118	5.59571	5.65335	5.69534	5.29266	5.3119	5.6585	5.69662	5.31398
0.544	4.99648	4.96899	5.08932	4.47667	3.49303	3.572	4.44615	4.68912	4.3788	4.54114	4.25825	4.40305	4.40188	4.37657	4.4576	4.40692	4.29131	4.45143	5.57128	5.24484	5.59016	5.64793	5.69001	5.28641	5.3057	5.65309	5.69129	5.30777
0.545	4.99221	4.96462	5.08524	4.47126	3.4854	3.5645	4.44065	4.68414	4.37313	4.53581	4.25517	4.40096	4.39956	4.3762	4.4554	4.40375	4.28852	4.44575	5.56569	5.23851	5.58461	5.64251	5.68468	5.28017	5.29949	5.64767	5.68596	5.30157
0.546	4.98793	4.96026	5.08116	4.46585	3.47777	3.55699	4.43515	4.67917	4.36746	4.53049	4.25209	4.39886	4.39724	4.3758	4.45319	4.40058	4.28572	4.44007	5.56009	5.23217	5.57906	5.6371	5.67935	5.27392	5.29329	5.64225	5.68063	5.29536
0.547	4.98366	4.9559	5.07708	4.46043	3.47014	3.54949	4.42965	4.67419	4.36178	4.52516	4.24901	4.39675	4.3949	4.3754	4.45097	4.3974	4.28292	4.43439	5.5545	5.22583	5.57351	5.63168	5.67402	5.26767	5.28708	5.63683	5.6753	5.28916
0.548	4.97939	4.95153	5.073	4.45502	3.46251	3.54198	4.42415	4.66921	4.35611	4.51984	4.24592	4.39463	4.39256	4.37498	4.44875	4.39423	4.28012	4.42871	5.54891	5.2195	5.56796	5.62626	5.66869	5.26142	5.28088	5.63142	5.66997	5.28295
0.549	4.97512	4.94717	5.06892	4.44961	3.45489	3.53448	4.41865	4.66423	4.35043	4.51451	4.24283	4.39251	4.39022	4.37455	4.44651	4.39105	4.27731	4.42303	5.54331	5.21316	5.56241	5.62084	5.66336	5.25517	5.27467	5.626	5.66464	5.27674
0.55	4.97085	4.9428	5.06484	4.44419	3.44726	3.52698	4.41315	4.65926	4.34476	4.50918	4.23973	4.39037	4.38786	4.3741	4.44426	4.38787	4.27449	4.41735	5.53772	5.20682	5.55686	5.61543	5.65803	5.24892	5.26847	5.62058	5.65931	5.27054
0.551	4.96657	4.93844	5.06076	4.43878	3.43963	3.51947	4.40765	4.65428	4.33909	4.50386	4.23663	4.38823	4.3855	4.37364	4.44201	4.38468	4.27167	4.41167	5.53213	5.20049	5.55131	5.61001	5.6527	5.24267	5.26226	5.61516	5.65398	5.26433
0.552	4.9623	4.93407	5.05668	4.43337	3.432	3.51197	4.40215	4.6493	4.33341	4.49853	4.23353	4.38608	4.38313	4.37317	4.43975	4.3815	4.26885	4.40599	5.52654	5.19415	5.54577	5.60459	5.64737	5.23642	5.25605	5.60975	5.64865	5.25813
0.553	4.95803	4.92971	5.0526	4.42795	3.42437	3.50446	4.39665	4.64433	4.32774	4.4932	4.23042	4.38392	4.38075	4.37268	4.43748	4.37831	4.26602	4.40031	5.52094	5.18781	5.54022	5.59917	5.64204	5.23017	5.24985	5.60433	5.64332	5.25192
0.554	4.95376	4.92535	5.04852	4.42254	3.41674	3.49696	4.39115	4.63935	4.32206	4.48788	4.22731	4.38176	4.37837	4.37218	4.4352	4.37512	4.26319	4.39463	5.51535	5.18148	5.53467	5.59376	5.63671	5.22392	5.24364	5.59891	5.63799	5.24572
0.555	4.94949	4.92098	5.04444	4.41713	3.40911	3.48946	4.38565	4.63437	4.31639	4.48255	4.2242	4.37958	4.37598	4.37167	4.43291	4.37193	4.26035	4.38895	5.50976	5.17514	5.52912	5.58834	5.63138	5.21768	5.23744	5.5935	5.63266	5.23951
0.556	4.94521	4.91662	5.04036	4.41171	3.40148	3.48195	4.38015	4.6294	4.31071	4.47723	4.22108	4.3774	4.37358	4.37114	4.43061	4.36874	4.25751	4.38327	5.50416	5.1688	5.52357	5.58292	5.62605	5.21143	5.23123	5.58808	5.62733	5.23331
0.557	4.94094	4.91225	5.03628	4.4063	3.39385	3.47445	4.37465	4.62442	4.30504	4.4719	4.21796	4.3752	4.37117	4.3706	4.4283	4.36555	4.25466	4.37759	5.49857	5.16247	5.51802	5.5775	5.62072	5.20518	5.22503	5.58266	5.622	5.2271
0.558	4.93667	4.90789	5.0322	4.40089	3.38622	3.46694	4.36914	4.61944	4.29937	4.46657	4.21483	4.373	4.36876	4.37005	4.42598	4.36236	4.25181	4.37191	5.49298	5.15613	5.51247	5.57209	5.61539	5.19893	5.21882	5.57724	5.61667	5.22089
0.559	4.9324	4.90353	5.02812	4.39547	3.37859	3.45944	4.36364	4.61446	4.29369	4.46125	4.2117	4.3708	4.36634	4.36948	4.42366	4.35916	4.24895	4.36623	5.48739	5.14979	5.50692	5.56667	5.61006	5.19268	5.21262	5.57183	5.61134	5.21469
0.56	4.92812	4.89916	5.02405	4.39006	3.37096	3.45194	4.35814	4.60949	4.28802	4.45592	4.20857	4.36858	4.36392	4.3689	4.42133	4.35596	4.2461	4.36055	5.48179	5.14346	5.50137	5.56125	5.60473	5.18643	5.20641	5.56641	5.60601	5.20848
0.561	4.92385	4.8948	5.01997	4.38465	3.36333	3.44443	4.35264	4.60451	4.28234	4.4506	4.20543	4.36636	4.36148	4.36831	4.41899	4.35276	4.24323	4.35487	5.4762	5.13712	5.49582	5.55583	5.5994	5.18018	5.20021	5.56099	5.60068	5.20228
0.562	4.91958	4.89043	5.01589	4.37923	3.3557	3.43693	4.34714	4.59953	4.27667	4.44527	4.2023	4.36413	4.35904	4.36771	4.41664	4.34956	4.24036	4.34919	5.47061	5.13079	5.49028	5.55042	5.59407	5.17393	5.194	5.55557	5.59536	5.19607
0.563	4.91531	4.88607	5.01181	4.37382	3.34807	3.42942	4.34164	4.59456	4.271	4.43994	4.19915	4.36189	4.3566	4.36709	4.41428	4.34636	4.23749	4.34351	5.46501	5.12445	5.48473	5.545	5.58874	5.16768	5.18779	5.55016	5.59003	5.18987
0.564	4.91104	4.8817	5.00773	4.36841	3.34044	3.42192	4.33614	4.58958	4.26532	4.43462	4.19601	4.35964	4.35414	4.36646	4.41192	4.34315	4.23462	4.33783	5.45942	5.11811	5.47918	5.53958	5.58341	5.16143	5.18159	5.54474	5.5847	5.18366
0.565	4.90676	4.87734	5.00365	4.36299	3.33281	3.41442	4.33064	4.5846	4.25965	4.42929	4.19286	4.35738	4.35168	4.36581	4.40954	4.33995	4.23173	4.33214	5.45383	5.11178	5.47363	5.53416	5.57808	5.15519	5.17538	5.53932	5.57937	5.17745
0.566	4.90249	4.87298	4.99957	4.35758	3.32518	3.40691	4.32514	4.57963	4.25397	4.42396	4.18971	4.35512	4.34921	4.36516	4.40716	4.33674	4.22885	4.32646	5.44824	5.10544	5.46808	5.52875	5.57275	5.14894	5.16918	5.5339	5.57404	5.17125
0.567	4.89822	4.86861	4.99549	4.35217	3.31755	3.39941	4.31964	4.57465	4.2483	4.41864	4.18655	4.35285	4.34674	4.36449	4.40477	4.33353	4.22596	4.32078	5.44264	5.0991	5.46253	5.52333	5.56742	5.14269	5.16297	5.52849	5.56871	5.16504
0.568	4.89395	4.86425	4.99141	4.34675	3.30992	3.3919	4.31414	4.56967	4.24262	4.41331	4.18339	4.35057	4.34426	4.3638	4.40237	4.33032	4.22307	4.3151	5.43705	5.09277	5.45698	5.51791	5.56209	5.13644	5.15677	5.52307	5.56338	5.15884
0.569	4.88968	4.85988	4.98733	4.34134	3.30229	3.3844	4.30864	4.5647	4.23695	4.40799	4.18023	4.34829	4.34178	4.36311	4.39997	4.3271	4.22017	4.30942	5.43146	5.08643	5.45143	5.51249	5.55676	5.13019	5.15056	5.51765	5.55805	5.15263
0.57	4.8854	4.85552	4.98325	4.33593	3.29466	3.3769	4.30314	4.55972	4.23128	4.40266	4.17706	4.346	4.33928	4.3624	4.39755	4.32389	4.21727	4.30374	5.42587	5.08009	5.44588	5.50708	5.55144	5.12394	5.14436	5.51223	5.55272	5.14643
0.571	4.88113	4.85116	4.97917	4.33051	3.28703	3.36939	4.29764	4.55474	4.2256	4.39733	4.17389	4.3437	4.33678	4.36168	4.39513	4.32067	4.21437	4.29806	5.42027	5.07376	5.44033	5.50166	5.54611	5.11769	5.13815	5.50682	5.54739	5.14022
0.572	4.87686	4.84679	4.97509	4.3251	3.2794	3.36189	4.29214	4.54976	4.21993	4.39201	4.17072	4.34139	4.33428	4.36095	4.3927	4.31746	4.21146	4.29238	5.41468	5.06742	5.43479	5.49624	5.54078	5.11144	5.13194	5.5014	5.54206	5.13401
0.573	4.87259	4.84243	4.97101	4.31969	3.27177	3.35438	4.28664	4.54479	4.21425	4.38668	4.16755	4.33908	4.33177	4.3602	4.39027	4.31424	4.20855	4.2867	5.40909	5.06108	5.42924	5.49082	5.53545	5.10519	5.12574	5.49598	5.53673	5.12781
0.574	4.86831	4.83806	4.96693	4.31427	3.26414	3.34688	4.28114	4.53981	4.20858	4.38136	4.16437	4.33676	4.32925	4.35945	4.38782	4.31102	4.20563	4.28102	5.40349	5.05475	5.42369	5.48541	5.53012	5.09894	5.11953	5.49056	5.5314	5.1216
0.575	4.86404	4.8337	4.96285	4.30886	3.25651	3.33938	4.27564	4.53483	4.2029	4.37603	4.16119	4.33443	4.32673	4.35868	4.38537	4.3078	4.20271	4.27534	5.3979	5.04841	5.41814	5.47999	5.52479	5.09269	5.11333	5.48515	5.52607	5.1154
0.576	4.85977	4.82934	4.95877	4.30345	3.24888	3.33187	4.27014	4.52986	4.19723	4.3707	4.158	4.33209	4.3242	4.35789	4.38291	4.30458	4.19979	4.26966	5.39231	5.04208	5.41259	5.47457	5.51946	5.08645	5.10712	5.47973	5.52074	5.10919
0.577	4.8555	4.82497	4.9547	4.29803	3.24125	3.32437	4.26464	4.52488	4.19156	4.36538	4.15482	4.32975	4.32166	4.3571	4.38045	4.30135	4.19686	4.26398	5.38672	5.03574	5.40704	5.46915	5.51413	5.0802	5.10092	5.47431	5.51541	5.10299
0.578	4.85123	4.82061	4.95062	4.29262	3.23362	3.31686	4.25914	4.5199	4.18588	4.36005	4.15163	4.3274	4.31912	4.35629	4.37798	4.29813	4.19393	4.2583	5.38112	5.0294	5.40149	5.46374	5.5088	5.07395	5.09471	5.46889	5.51008	5.09678
0.579	4.84695	4.81624	4.94654	4.28721	3.22599	3.30936	4.25364	4.51493	4.18021	4.35472	4.14843	4.32504	4.31657	4.35547	4.37549	4.2949	4.191	4.25262	5.37553	5.02307	5.39594	5.45832	5.50347	5.0677	5.08851	5.46348	5.50475	5.09057
0.58	4.84268	4.81188	4.94246	4.28179	3.21836	3.30186	4.24814	4.50995	4.17453	4.3494	4.14524	4.32268	4.31402	4.35464	4.37301	4.29167	4.18806	4.24694	5.36994	5.01673	5.39039	5.4529	5.49814	5.06145	5.0823	5.45806	5.49942	5.08437
0.581	4.83841	4.80751	4.93838	4.27638	3.21073	3.29435	4.24264	4.50497	4.16886	4.34407	4.14204	4.32031	4.31146	4.3538	4.37051	4.28844	4.18512	4.24126	5.36434	5.01039	5.38484	5.44749	5.49281	5.0552	5.07609	5.45264	5.49409	5.07816
0.582	4.83414	4.80315	4.9343	4.27097	3.2031	3.28685	4.23714	4.49999	4.16319	4.33875	4.13884	4.31793	4.30889	4.35294	4.36801	4.28521	4.18217	4.23558	5.35875	5.00406	5.3793	5.44207	5.48748	5.04895	5.06989	5.44722	5.48876	5.07196
0.583	4.82987	4.79879	4.93022	4.26555	3.19547	3.27934	4.23164	4.49502	4.15751	4.33342	4.13563	4.31555	4.30632	4.35207	4.3655	4.28198	4.17922	4.2299	5.35316	4.99772	5.37375	5.43665	5.48215	5.0427	5.06368	5.44181	5.48343	5.06575
0.584	4.82559	4.79442	4.92614	4.26014	3.18785	3.27184	4.22614	4.49004	4.15184	4.32809	4.13243	4.31316	4.30374	4.35119	4.36298	4.27874	4.17627	4.22422	5.34757	4.99138	5.3682	5.43123	5.47682	5.03645	5.05748	5.43639	5.4781	5.05955
0.585	4.82132	4.79006	4.92206	4.25473	3.18022	3.26434	4.22064	4.48506	4.14616	4.32277	4.12921	4.31076	4.30116	4.3503	4.36046	4.27551	4.17331	4.21854	5.34197	4.98505	5.36265	5.42582	5.47149	5.0302	5.05127	5.43097	5.47277	5.05334
0.586	4.81705	4.78569	4.91798	4.24931	3.17259	3.25683	4.21514	4.48009	4.14049	4.31744	4.126	4.30836	4.29857	4.3494	4.35793	4.27227	4.17035	4.21286	5.33638	4.97871	5.3571	5.4204	5.46616	5.02396	5.04507	5.42555	5.46744	5.04713
0.587	4.81278	4.78133	4.9139	4.2439	3.16496	3.24933	4.20964	4.47511	4.13481	4.31211	4.12279	4.30595	4.29598	4.34849	4.3554	4.26903	4.16739	4.20718	5.33079	4.97237	5.35155	5.41498	5.46083	5.01771	5.03886	5.42014	5.46211	5.04093
0.588	4.8085	4.77697	4.90982	4.23848	3.15733	3.24182	4.20414	4.47013	4.12914	4.30679	4.11957	4.30354	4.29338	4.34756	4.35285	4.26579	4.16442	4.2015	5.32519	4.96604	5.346	5.40956	5.4555	5.01146	5.03266	5.41472	5.45678	5.03472
0.589	4.80423	4.7726	4.90574	4.23307	3.1497	3.23432	4.19863	4.46516	4.12347	4.30146	4.11635	4.30111	4.29077	4.34662	4.3503	4.26255	4.16145	4.19582	5.3196	4.9597	5.34045	5.40415	5.45017	5.00521	5.02645	5.4093	5.45145	5.02852
0.59	4.79996	4.76824	4.90166	4.22766	3.14207	3.22682	4.19313	4.46018	4.11779	4.29614	4.11312	4.29868	4.28816	4.34567	4.34775	4.25931	4.15848	4.19014	5.31401	4.95336	5.3349	5.39873	5.44484	4.99896	5.02024	5.40388	5.44612	5.02231
0.591	4.79569	4.76387	4.89758	4.22224	3.13444	3.21931	4.18763	4.4552	4.11212	4.29081	4.1099	4.29625	4.28555	4.34471	4.34518	4.25607	4.15551	4.18446	5.30842	4.94703	5.32935	5.39331	5.43951	4.99271	5.01404	5.39847	5.44079	5.01611
0.592	4.79142	4.75951	4.8935	4.21683	3.12681	3.21181	4.18213	4.45022	4.10644	4.28548	4.10667	4.29381	4.28292	4.34374	4.34261	4.25282	4.15253	4.17878	5.30282	4.94069	5.32381	5.38789	5.43418	4.98646	5.00783	5.39305	5.43547	5.0099
0.593	4.78714	4.75514	4.88942	4.21142	3.11918	3.2043	4.17663	4.44525	4.10077	4.28016	4.10344	4.29136	4.2803	4.34275	4.34004	4.24958	4.14954	4.1731	5.29723	4.93436	5.31826	5.38248	5.42885	4.98021	5.00163	5.38763	5.43014	5.00369
0.594	4.78287	4.75078	4.88534	4.206	3.11155	3.1968	4.17113	4.44027	4.09509	4.27483	4.1002	4.28891	4.27767	4.34175	4.33745	4.24633	4.14656	4.16742	5.29164	4.92802	5.31271	5.37706	5.42352	4.97396	4.99542	5.38221	5.42481	4.99749
0.595	4.7786	4.74642	4.88126	4.20059	3.10392	3.18929	4.16563	4.43529	4.08942	4.26951	4.09696	4.28645	4.27503	4.34075	4.33486	4.24308	4.14357	4.16174	5.28604	4.92168	5.30716	5.37164	5.41819	4.96771	4.98922	5.3768	5.41948	4.99128
0.596	4.77433	4.74205	4.87719	4.19518	3.09629	3.18179	4.16013	4.43032	4.08375	4.26418	4.09372	4.28398	4.27239	4.33973	4.33227	4.23983	4.14057	4.15606	5.28045	4.91535	5.30161	5.36622	5.41286	4.96146	4.98301	5.37138	5.41415	4.98508
0.597	4.77006	4.73769	4.87311	4.18976	3.08866	3.17429	4.15463	4.42534	4.07807	4.25885	4.09048	4.28151	4.26974	4.3387	4.32967	4.23658	4.13758	4.15038	5.27486	4.90901	5.29606	5.36081	5.40753	4.95522	4.97681	5.36596	5.40882	4.97887
0.598	4.76578	4.73332	4.86903	4.18435	3.08103	3.16678	4.14913	4.42036	4.0724	4.25353	4.08724	4.27903	4.26709	4.33766	4.32706	4.23333	4.13458	4.1447	5.26927	4.90267	5.29051	5.35539	5.4022	4.94897	4.9706	5.36054	5.40349	4.97267
0.599	4.76151	4.72896	4.86495	4.17894	3.0734	3.15928	4.14363	4.41539	4.06672	4.2482	4.08399	4.27655	4.26443	4.3366	4.32445	4.23008	4.13158	4.13902	5.26367	4.89634	5.28496	5.34997	5.39687	4.94272	4.96439	5.35513	5.39816	4.96646
0.6	4.75724	4.7246	4.86087	4.17352	3.06577	3.15177	4.13813	4.41041	4.06105	4.24287	4.08074	4.27406	4.26177	4.33554	4.32183	4.22683	4.12857	4.13334	5.25808	4.89	5.27941	5.34455	5.39154	4.93647	4.95819	5.34971	5.39283	4.96025
0.601	4.75297	4.72023	4.85679	4.16811	3.05814	3.14427	4.13263	4.40543	4.05537	4.23755	4.07749	4.27156	4.2591	4.33446	4.3192	4.22357	4.12556	4.12766	5.25249	4.88366	5.27386	5.33914	5.38621	4.93022	4.95198	5.34429	5.3875	4.95405
0.602	4.74869	4.71587	4.85271	4.1627	3.05051	3.13677	4.12713	4.40045	4.0497	4.23222	4.07423	4.26906	4.25643	4.33338	4.31657	4.22031	4.12255	4.12198	5.24689	4.87733	5.26832	5.33372	5.38088	4.92397	4.94578	5.33887	5.38217	4.94784
0.603	4.74442	4.7115	4.84863	4.15728	3.04288	3.12926	4.12163	4.39548	4.04403	4.2269	4.07098	4.26655	4.25375	4.33228	4.31393	4.21706	4.11954	4.1163	5.2413	4.87099	5.26277	5.3283	5.37555	4.91772	4.93957	5.33346	5.37684	4.94164
0.604	4.74015	4.70714	4.84455	4.15187	3.03525	3.12176	4.11613	4.3905	4.03835	4.22157	4.06772	4.26404	4.25106	4.33117	4.31128	4.2138	4.11652	4.11062	5.23571	4.86465	5.25722	5.32288	5.37022	4.91147	4.93337	5.32804	5.37151	4.93543
0.605	4.73588	4.70277	4.84047	4.14646	3.02762	3.11425	4.11063	4.38552	4.03268	4.21624	4.06446	4.26152	4.24838	4.33006	4.30863	4.21054	4.1135	4.10493	5.23012	4.85832	5.25167	5.31747	5.36489	4.90522	4.92716	5.32262	5.36618	4.92923
0.606	4.73161	4.69841	4.83639	4.14104	3.01999	3.10675	4.10513	4.38055	4.027	4.21092	4.06119	4.25899	4.24568	4.32893	4.30598	4.20728	4.11048	4.09925	5.22452	4.85198	5.24612	5.31205	5.35956	4.89897	4.92096	5.3172	5.36085	4.92302
0.607	4.72733	4.69405	4.83231	4.13563	3.01236	3.09925	4.09963	4.37557	4.02133	4.20559	4.05793	4.25646	4.24299	4.32779	4.30332	4.20402	4.10745	4.09357	5.21893	4.84564	5.24057	5.30663	5.35423	4.89272	4.91475	5.31179	5.35552	4.91681
0.608	4.72306	4.68968	4.82823	4.13022	3.00473	3.09174	4.09413	4.37059	4.01565	4.20026	4.05466	4.25393	4.24029	4.32663	4.30065	4.20075	4.10442	4.08789	5.21334	4.83931	5.23502	5.30121	5.3489	4.88648	4.90855	5.30637	5.35019	4.91061
0.609	4.71879	4.68532	4.82415	4.1248	2.9971	3.08424	4.08863	4.36562	4.00998	4.19494	4.05139	4.25139	4.23758	4.32547	4.29798	4.19749	4.10139	4.08221	5.20774	4.83297	5.22947	5.2958	5.34357	4.88023	4.90234	5.30095	5.34486	4.9044
0.61	4.71452	4.68095	4.82007	4.11939	2.98947	3.07673	4.08313	4.36064	4.00431	4.18961	4.04812	4.24884	4.23487	4.3243	4.2953	4.19423	4.09836	4.07653	5.20215	4.82663	5.22392	5.29038	5.33825	4.87398	4.89613	5.29553	5.33953	4.8982
0.611	4.71024	4.67659	4.81599	4.11398	2.98184	3.06923	4.07763	4.35566	3.99863	4.18429	4.04484	4.24629	4.23215	4.32312	4.29261	4.19096	4.09532	4.07085	5.19656	4.8203	5.21837	5.28496	5.33292	4.86773	4.88993	5.29012	5.3342	4.89199
0.612	4.70597	4.67223	4.81191	4.10856	2.97421	3.06172	4.07213	4.35068	3.99296	4.17896	4.04156	4.24373	4.22943	4.32192	4.28992	4.18769	4.09228	4.06517	5.19097	4.81396	5.21283	5.27954	5.32759	4.86148	4.88372	5.2847	5.32887	4.88579
0.613	4.7017	4.66786	4.80783	4.10315	2.96658	3.05422	4.06663	4.34571	3.98728	4.17363	4.03828	4.24117	4.22671	4.32072	4.28723	4.18442	4.08924	4.05949	5.18537	4.80763	5.20728	5.27413	5.32226	4.85523	4.87752	5.27928	5.32354	4.87958
0.614	4.69743	4.6635	4.80376	4.09774	2.95895	3.04672	4.06113	4.34073	3.98161	4.16831	4.035	4.2386	4.22398	4.31951	4.28453	4.18115	4.08619	4.05381	5.17978	4.80129	5.20173	5.26871	5.31693	4.84898	4.87131	5.27386	5.31821	4.87337
0.615	4.69316	4.65913	4.79968	4.09232	2.95132	3.03921	4.05563	4.33575	3.97593	4.16298	4.03172	4.23603	4.22124	4.31828	4.28182	4.17788	4.08314	4.04813	5.17419	4.79495	5.19618	5.26329	5.3116	4.84273	4.86511	5.26845	5.31288	4.86717
0.616	4.68888	4.65477	4.7956	4.08691	2.94369	3.03171	4.05013	4.33078	3.97026	4.15765	4.02843	4.23345	4.21851	4.31705	4.27911	4.17461	4.08009	4.04245	5.16859	4.78862	5.19063	5.25787	5.30627	4.83648	4.8589	5.26303	5.30755	4.86096
0.617	4.68461	4.6504	4.79152	4.0815	2.93606	3.0242	4.04462	4.3258	3.96459	4.15233	4.02514	4.23087	4.21576	4.3158	4.27639	4.17134	4.07704	4.03677	5.163	4.78228	5.18508	5.25246	5.30094	4.83023	4.8527	5.25761	5.30222	4.85476
0.618	4.68034	4.64604	4.78744	4.07608	2.92843	3.0167	4.03912	4.32082	3.95891	4.147	4.02185	4.22828	4.21302	4.31454	4.27367	4.16807	4.07398	4.03109	5.15741	4.77594	5.17953	5.24704	5.29561	4.82399	4.84649	5.2522	5.29689	4.84855
0.619	4.67607	4.64168	4.78336	4.07067	2.9208	3.0092	4.03362	4.31585	3.95324	4.14168	4.01856	4.22568	4.21026	4.31328	4.27094	4.16479	4.07092	4.02541	5.15182	4.76961	5.17398	5.24162	5.29028	4.81774	4.84028	5.24678	5.29156	4.84235
0.62	4.6718	4.63731	4.77928	4.06526	2.91317	3.00169	4.02812	4.31087	3.94756	4.13635	4.01527	4.22308	4.20751	4.312	4.26821	4.16152	4.06786	4.01973	5.14622	4.76327	5.16843	5.2362	5.28495	4.81149	4.83408	5.24136	5.28623	4.83614
0.621	4.66752	4.63295	4.7752	4.05984	2.90554	2.99419	4.02262	4.30589	3.94189	4.13102	4.01197	4.22048	4.20475	4.31072	4.26547	4.15824	4.06479	4.01405	5.14063	4.75693	5.16288	5.23079	5.27962	4.80524	4.82787	5.23594	5.2809	4.82994
0.622	4.66325	4.62858	4.77112	4.05443	2.89791	2.98668	4.01712	4.30091	3.93622	4.1257	4.00867	4.21787	4.20198	4.30942	4.26273	4.15496	4.06173	4.00837	5.13504	4.7506	5.15734	5.22537	5.27429	4.79899	4.82167	5.23053	5.27557	4.82373
0.623	4.65898	4.62422	4.76704	4.04902	2.89028	2.97918	4.01162	4.29594	3.93054	4.12037	4.00537	4.21526	4.19921	4.30811	4.25998	4.15169	4.05866	4.00269	5.12944	4.74426	5.15179	5.21995	5.26896	4.79274	4.81546	5.22511	5.27025	4.81752
0.624	4.65471	4.61986	4.76296	4.0436	2.88265	2.97168	4.00612	4.29096	3.92487	4.11504	4.00207	4.21264	4.19644	4.3068	4.25723	4.14841	4.05559	3.99701	5.12385	4.73792	5.14624	5.21453	5.26363	4.78649	4.80926	5.21969	5.26492	4.81132
0.625	4.65043	4.61549	4.75888	4.03819	2.87502	2.96417	4.00062	4.28598	3.91919	4.10972	3.99876	4.21002	4.19366	4.30547	4.25447	4.14513	4.05251	3.99133	5.11826	4.73159	5.14069	5.20912	5.2583	4.78024	4.80305	5.21427	5.25959	4.80511
0.626	4.64616	4.61113	4.7548	4.03278	2.86739	2.95667	3.99512	4.28101	3.91352	4.10439	3.99546	4.20739	4.19088	4.30414	4.2517	4.14185	4.04943	3.98565	5.11267	4.72525	5.13514	5.2037	5.25297	4.77399	4.79685	5.20886	5.25426	4.79891
0.627	4.64189	4.60676	4.75072	4.02736	2.85976	2.94916	3.98962	4.27603	3.90784	4.09907	3.99215	4.20475	4.1881	4.30279	4.24894	4.13856	4.04635	3.97997	5.10707	4.71891	5.12959	5.19828	5.24764	4.76774	4.79064	5.20344	5.24893	4.7927
0.628	4.63762	4.6024	4.74664	4.02195	2.85213	2.94166	3.98412	4.27105	3.90217	4.09374	3.98884	4.20212	4.18531	4.30143	4.24616	4.13528	4.04327	3.97429	5.10148	4.71258	5.12404	5.19286	5.24231	4.76149	4.78443	5.19802	5.2436	4.7865
0.629	4.63335	4.59803	4.74256	4.01654	2.8445	2.93415	3.97862	4.26608	3.8965	4.08841	3.98552	4.19947	4.18252	4.30007	4.24339	4.132	4.04019	3.96861	5.09589	4.70624	5.11849	5.18745	5.23698	4.75525	4.77823	5.1926	5.23827	4.78029
0.63	4.62907	4.59367	4.73848	4.01112	2.83688	2.92665	3.97312	4.2611	3.89082	4.08309	3.98221	4.19683	4.17972	4.29869	4.2406	4.12871	4.0371	3.96293	5.0903	4.6999	5.11294	5.18203	5.23165	4.749	4.77202	5.18719	5.23294	4.77408
0.631	4.6248	4.58931	4.7344	4.00571	2.82925	2.91915	3.96762	4.25612	3.88515	4.07776	3.97889	4.19417	4.17692	4.29731	4.23782	4.12543	4.03401	3.95725	5.0847	4.69357	5.10739	5.17661	5.22632	4.74275	4.76582	5.18177	5.22761	4.76788
0.632	4.62053	4.58494	4.73033	4.0003	2.82162	2.91164	3.96212	4.25114	3.87947	4.07243	3.97558	4.19152	4.17411	4.29592	4.23502	4.12214	4.03092	3.95157	5.07911	4.68723	5.10185	5.17119	5.22099	4.7365	4.75961	5.17635	5.22228	4.76167
0.633	4.61626	4.58058	4.72625	3.99488	2.81399	2.90414	3.95662	4.24617	3.8738	4.06711	3.97226	4.18885	4.1713	4.29451	4.23223	4.11885	4.02783	3.94589	5.07352	4.6809	5.0963	5.16578	5.21566	4.73025	4.75341	5.17093	5.21695	4.75547
0.634	4.61199	4.57621	4.72217	3.98947	2.80636	2.89663	3.95112	4.24119	3.86812	4.06178	3.96893	4.18619	4.16849	4.2931	4.22942	4.11557	4.02473	3.94021	5.06792	4.67456	5.09075	5.16036	5.21033	4.724	4.7472	5.16552	5.21162	4.74926
0.635	4.60771	4.57185	4.71809	3.98406	2.79873	2.88913	3.94562	4.23621	3.86245	4.05646	3.96561	4.18352	4.16567	4.29168	4.22662	4.11228	4.02163	3.93453	5.06233	4.66822	5.0852	5.15494	5.205	4.71775	4.741	5.1601	5.20629	4.74305
0.636	4.60344	4.56749	4.71401	3.97864	2.7911	2.88163	3.94012	4.23124	3.85678	4.05113	3.96229	4.18084	4.16285	4.29025	4.22381	4.10899	4.01853	3.92885	5.05674	4.66189	5.07965	5.14952	5.19967	4.7115	4.73479	5.15468	5.20096	4.73685
0.637	4.59917	4.56312	4.70993	3.97323	2.78347	2.87412	3.93462	4.22626	3.8511	4.0458	3.95896	4.17816	4.16003	4.2888	4.22099	4.1057	4.01543	3.92317	5.05115	4.65555	5.0741	5.14411	5.19434	4.70525	4.72858	5.14926	5.19563	4.73064
0.638	4.5949	4.55876	4.70585	3.96782	2.77584	2.86662	3.92912	4.22128	3.84543	4.04048	3.95563	4.17548	4.1572	4.28735	4.21817	4.10241	4.01232	3.91749	5.04555	4.64921	5.06855	5.13869	5.18901	4.699	4.72238	5.14385	5.1903	4.72444
0.639	4.59062	4.55439	4.70177	3.9624	2.76821	2.85911	3.92362	4.21631	3.83975	4.03515	3.9523	4.17279	4.15437	4.28589	4.21535	4.09911	4.00921	3.91181	5.03996	4.64288	5.063	5.13327	5.18368	4.69275	4.71617	5.13843	5.18497	4.71823
0.64	4.58635	4.55003	4.69769	3.95699	2.76058	2.85161	3.91812	4.21133	3.83408	4.02982	3.94897	4.1701	4.15153	4.28443	4.21252	4.09582	4.0061	3.90613	5.03437	4.63654	5.05745	5.12785	5.17835	4.68651	4.70997	5.13301	5.17964	4.71203
0.641	4.58208	4.54566	4.69361	3.95158	2.75295	2.8441	3.91262	4.20635	3.8284	4.0245	3.94563	4.1674	4.1487	4.28295	4.20969	4.09253	4.00299	3.90045	5.02877	4.6302	5.0519	5.12244	5.17302	4.68026	4.70376	5.12759	5.17431	4.70582
0.642	4.57781	4.5413	4.68953	3.94616	2.74532	2.8366	3.90712	4.20137	3.82273	4.01917	3.9423	4.1647	4.14585	4.28146	4.20685	4.08923	3.99988	3.89477	5.02318	4.62387	5.04636	5.11702	5.16769	4.67401	4.69756	5.12218	5.16898	4.69961
0.643	4.57354	4.53694	4.68545	3.94075	2.73769	2.8291	3.90161	4.1964	3.81706	4.01385	3.93896	4.162	4.14301	4.27997	4.20401	4.08593	3.99676	3.88909	5.01759	4.61753	5.04081	5.1116	5.16236	4.66776	4.69135	5.11676	5.16365	4.69341
0.644	4.56926	4.53257	4.68137	3.93533	2.73006	2.82159	3.89611	4.19142	3.81138	4.00852	3.93562	4.15929	4.14016	4.27846	4.20116	4.08264	3.99364	3.8834	5.012	4.61119	5.03526	5.10618	5.15703	4.66151	4.68515	5.11134	5.15832	4.6872
0.645	4.56499	4.52821	4.67729	3.92992	2.72243	2.81409	3.89061	4.18644	3.80571	4.00319	3.93228	4.15657	4.1373	4.27695	4.19831	4.07934	3.99052	3.87772	5.0064	4.60486	5.02971	5.10077	5.1517	4.65526	4.67894	5.10592	5.15299	4.681
0.646	4.56072	4.52384	4.67321	3.92451	2.7148	2.80658	3.88511	4.18147	3.80003	3.99787	3.92894	4.15385	4.13445	4.27542	4.19546	4.07604	3.9874	3.87204	5.00081	4.59852	5.02416	5.09535	5.14637	4.64901	4.67273	5.10051	5.14766	4.67479
0.647	4.55645	4.51948	4.66913	3.91909	2.70717	2.79908	3.87961	4.17649	3.79436	3.99254	3.92559	4.15113	4.13159	4.27389	4.1926	4.07274	3.98427	3.86636	4.99522	4.59218	5.01861	5.08993	5.14104	4.64276	4.66653	5.09509	5.14233	4.66859
0.648	4.55217	4.51512	4.66505	3.91368	2.69954	2.79158	3.87411	4.17151	3.78868	3.98721	3.92225	4.14841	4.12872	4.27235	4.18974	4.06944	3.98115	3.86068	4.98962	4.58585	5.01306	5.08451	5.13571	4.63651	4.66032	5.08967	5.137	4.66238
0.649	4.5479	4.51075	4.66097	3.90827	2.69191	2.78407	3.86861	4.16654	3.78301	3.98189	3.9189	4.14568	4.12586	4.2708	4.18687	4.06614	3.97802	3.855	4.98403	4.57951	5.00751	5.0791	5.13038	4.63026	4.65412	5.08425	5.13167	4.65617
0.65	4.54363	4.50639	4.65689	3.90285	2.68428	2.77657	3.86311	4.16156	3.77734	3.97656	3.91555	4.14294	4.12298	4.26925	4.184	4.06284	3.97488	3.84932	4.97844	4.57317	5.00196	5.07368	5.12505	4.62401	4.64791	5.07884	5.12634	4.64997
0.651	4.53936	4.50202	4.65282	3.89744	2.67665	2.76906	3.85761	4.15658	3.77166	3.97124	3.9122	4.1402	4.12011	4.26768	4.18112	4.05954	3.97175	3.84364	4.97285	4.56684	4.99641	5.06826	5.11972	4.61777	4.64171	5.07342	5.12101	4.64376
0.652	4.53509	4.49766	4.64874	3.89203	2.66902	2.76156	3.85211	4.1516	3.76599	3.96591	3.90885	4.13746	4.11723	4.26611	4.17824	4.05624	3.96862	3.83796	4.96725	4.5605	4.99087	5.06284	5.1144	4.61152	4.6355	5.068	5.11568	4.63756
0.653	4.53081	4.49329	4.64466	3.88661	2.66139	2.75406	3.84661	4.14663	3.76031	3.96058	3.90549	4.13471	4.11435	4.26452	4.17536	4.05293	3.96548	3.83228	4.96166	4.55417	4.98532	5.05743	5.10907	4.60527	4.6293	5.06258	5.11035	4.63135
0.654	4.52654	4.48893	4.64058	3.8812	2.65376	2.74655	3.84111	4.14165	3.75464	3.95526	3.90214	4.13196	4.11147	4.26293	4.17247	4.04963	3.96234	3.8266	4.95607	4.54783	4.97977	5.05201	5.10374	4.59902	4.62309	5.05717	5.10502	4.62515
0.655	4.52227	4.48457	4.6365	3.87579	2.64613	2.73905	3.83561	4.13667	3.74896	3.94993	3.89878	4.12921	4.10858	4.26133	4.16958	4.04633	3.9592	3.82092	4.95047	4.54149	4.97422	5.04659	5.09841	4.59277	4.61688	5.05175	5.0997	4.61894
0.656	4.518	4.4802	4.63242	3.87037	2.6385	2.73154	3.83011	4.1317	3.74329	3.9446	3.89542	4.12645	4.10569	4.25972	4.16669	4.04302	3.95605	3.81524	4.94488	4.53516	4.96867	5.04117	5.09308	4.58652	4.61068	5.04633	5.09437	4.61273
0.657	4.51373	4.47584	4.62834	3.86496	2.63087	2.72404	3.82461	4.12672	3.73761	3.93928	3.89206	4.12369	4.1028	4.2581	4.16379	4.03971	3.95291	3.80956	4.93929	4.52882	4.96312	5.03576	5.08775	4.58027	4.60447	5.04091	5.08904	4.60653
0.658	4.50945	4.47147	4.62426	3.85955	2.62324	2.71653	3.81911	4.12174	3.73194	3.93395	3.8887	4.12093	4.0999	4.25648	4.16089	4.03641	3.94976	3.80388	4.9337	4.52248	4.95757	5.03034	5.08242	4.57402	4.59827	5.0355	5.08371	4.60032
0.659	4.50518	4.46711	4.62018	3.85413	2.61561	2.70903	3.81361	4.11677	3.72627	3.92863	3.88534	4.11816	4.097	4.25484	4.15798	4.0331	3.94661	3.7982	4.9281	4.51615	4.95202	5.02492	5.07709	4.56777	4.59206	5.03008	5.07838	4.59412
0.66	4.50091	4.46275	4.6161	3.84872	2.60798	2.70153	3.80811	4.11179	3.72059	3.9233	3.88197	4.11538	4.0941	4.2532	4.15507	4.02979	3.94346	3.79252	4.92251	4.50981	4.94647	5.01951	5.07176	4.56152	4.58586	5.02466	5.07305	4.58791
0.661	4.49664	4.45838	4.61202	3.84331	2.60035	2.69402	3.80261	4.10681	3.71492	3.91797	3.87861	4.11261	4.09119	4.25155	4.15216	4.02648	3.94031	3.78684	4.91692	4.50347	4.94092	5.01409	5.06643	4.55527	4.57965	5.01924	5.06772	4.58171
0.662	4.49236	4.45402	4.60794	3.83789	2.59272	2.68652	3.79711	4.10183	3.70924	3.91265	3.87524	4.10983	4.08828	4.24989	4.14924	4.02317	3.93715	3.78116	4.91132	4.49714	4.93538	5.00867	5.0611	4.54903	4.57345	5.01383	5.06239	4.5755
0.663	4.48809	4.44965	4.60386	3.83248	2.58509	2.67901	3.79161	4.09686	3.70357	3.90732	3.87187	4.10704	4.08537	4.24823	4.14632	4.01986	3.934	3.77548	4.90573	4.4908	4.92983	5.00325	5.05577	4.54278	4.56724	5.00841	5.05706	4.56929
0.664	4.48382	4.44529	4.59978	3.82707	2.57746	2.67151	3.78611	4.09188	3.69789	3.90199	3.8685	4.10426	4.08245	4.24655	4.14339	4.01655	3.93084	3.7698	4.90014	4.48446	4.92428	4.99784	5.05044	4.53653	4.56103	5.00299	5.05173	4.56309
0.665	4.47955	4.44092	4.5957	3.82165	2.56983	2.66401	3.78061	4.0869	3.69222	3.89667	3.86513	4.10146	4.07953	4.24487	4.14046	4.01324	3.92768	3.76412	4.89455	4.47813	4.91873	4.99242	5.04511	4.53028	4.55483	4.99757	5.0464	4.55688
0.666	4.47528	4.43656	4.59162	3.81624	2.5622	2.6565	3.77511	4.08193	3.68655	3.89134	3.86176	4.09867	4.07661	4.24318	4.13753	4.00993	3.92452	3.75844	4.88895	4.47179	4.91318	4.987	5.03978	4.52403	4.54862	4.99216	5.04107	4.55068
0.667	4.471	4.4322	4.58754	3.81083	2.55457	2.649	3.7696	4.07695	3.68087	3.88602	3.85838	4.09587	4.07369	4.24148	4.1346	4.00661	3.92135	3.75276	4.88336	4.46545	4.90763	4.98158	5.03445	4.51778	4.54242	4.98674	5.03574	4.54447
0.668	4.46673	4.42783	4.58346	3.80541	2.54694	2.64149	3.7641	4.07197	3.6752	3.88069	3.85501	4.09307	4.07076	4.23978	4.13166	4.0033	3.91819	3.74708	4.87777	4.45912	4.90208	4.97617	5.02912	4.51153	4.53621	4.98132	5.03041	4.53827
0.669	4.46246	4.42347	4.57939	3.8	2.53931	2.63399	3.7586	4.06699	3.66952	3.87536	3.85163	4.09026	4.06783	4.23806	4.12871	3.99998	3.91502	3.7414	4.87217	4.45278	4.89653	4.97075	5.02379	4.50528	4.53001	4.9759	5.02508	4.53206
0.67	4.45819	4.4191	4.57531	3.79459	2.53168	2.62648	3.7531	4.06202	3.66385	3.87004	3.84825	4.08746	4.0649	4.23634	4.12577	3.99667	3.91185	3.73572	4.86658	4.44644	4.89098	4.96533	5.01846	4.49903	4.5238	4.97049	5.01975	4.52585
0.671	4.45392	4.41474	4.57123	3.78917	2.52405	2.61898	3.7476	4.05704	3.65817	3.86471	3.84487	4.08464	4.06196	4.23461	4.12282	3.99335	3.90868	3.73004	4.86099	4.44011	4.88543	4.95991	5.01313	4.49278	4.51759	4.96507	5.01442	4.51965
0.672	4.44964	4.41037	4.56715	3.78376	2.51642	2.61148	3.7421	4.05206	3.6525	3.85938	3.84149	4.08183	4.05902	4.23287	4.11986	3.99004	3.90551	3.72436	4.8554	4.43377	4.87989	4.9545	5.0078	4.48653	4.51139	4.95965	5.00909	4.51344
0.673	4.44537	4.40601	4.56307	3.77835	2.50879	2.60397	3.7366	4.04709	3.64683	3.85406	3.83811	4.07901	4.05608	4.23113	4.11691	3.98672	3.90233	3.71868	4.8498	4.42744	4.87434	4.94908	5.00247	4.48029	4.50518	4.95423	5.00376	4.50724
0.674	4.4411	4.40165	4.55899	3.77293	2.50116	2.59647	3.7311	4.04211	3.64115	3.84873	3.83472	4.07619	4.05313	4.22938	4.11395	3.9834	3.89916	3.713	4.84421	4.4211	4.86879	4.94366	4.99714	4.47404	4.49898	4.94882	4.99843	4.50103
0.675	4.43683	4.39728	4.55491	3.76752	2.49353	2.58896	3.7256	4.03713	3.63548	3.84341	3.83134	4.07336	4.05019	4.22762	4.11099	3.98008	3.89598	3.70732	4.83862	4.41476	4.86324	4.93824	4.99181	4.46779	4.49277	4.9434	4.9931	4.49483
0.676	4.43255	4.39292	4.55083	3.76211	2.4859	2.58146	3.7201	4.03216	3.6298	3.83808	3.82795	4.07053	4.04724	4.22585	4.10802	3.97676	3.8928	3.70164	4.83302	4.40843	4.85769	4.93283	4.98648	4.46154	4.48657	4.93798	4.98777	4.48862
0.677	4.42828	4.38855	4.54675	3.75669	2.47827	2.57396	3.7146	4.02718	3.62413	3.83275	3.82456	4.0677	4.04428	4.22407	4.10505	3.97344	3.88962	3.69596	4.82743	4.40209	4.85214	4.92741	4.98115	4.45529	4.48036	4.93256	4.98244	4.48241
0.678	4.42401	4.38419	4.54267	3.75128	2.47064	2.56645	3.7091	4.0222	3.61845	3.82743	3.82117	4.06486	4.04133	4.22229	4.10208	3.97012	3.88644	3.69028	4.82184	4.39575	4.84659	4.92199	4.97582	4.44904	4.47416	4.92715	4.97711	4.47621
0.679	4.41974	4.37983	4.53859	3.74587	2.46301	2.55895	3.7036	4.01722	3.61278	3.8221	3.81778	4.06203	4.03837	4.2205	4.0991	3.9668	3.88325	3.6846	4.81625	4.38942	4.84104	4.91657	4.97049	4.44279	4.46795	4.92173	4.97178	4.47
0.68	4.41547	4.37546	4.53451	3.74045	2.45538	2.55144	3.6981	4.01225	3.60711	3.81677	3.81439	4.05918	4.03541	4.2187	4.09612	3.96348	3.88007	3.67892	4.81065	4.38308	4.83549	4.91116	4.96516	4.43654	4.46174	4.91631	4.96645	4.4638
0.681	4.41119	4.3711	4.53043	3.73504	2.44775	2.54394	3.6926	4.00727	3.60143	3.81145	3.811	4.05634	4.03244	4.2169	4.09314	3.96016	3.87688	3.67323	4.80506	4.37674	4.82994	4.90574	4.95983	4.43029	4.45554	4.91089	4.96112	4.45759
0.682	4.40692	4.36673	4.52635	3.72962	2.44012	2.53643	3.6871	4.00229	3.59576	3.80612	3.80761	4.05349	4.02948	4.21509	4.09015	3.95684	3.87369	3.66755	4.79947	4.37041	4.82439	4.90032	4.9545	4.42404	4.44933	4.90548	4.95579	4.45139
0.683	4.40265	4.36237	4.52227	3.72421	2.43249	2.52893	3.6816	3.99732	3.59008	3.8008	3.80421	4.05064	4.02651	4.21327	4.08716	3.95351	3.8705	3.66187	4.79387	4.36407	4.81885	4.8949	4.94917	4.41779	4.44313	4.90006	4.95046	4.44518
0.684	4.39838	4.358	4.51819	3.7188	2.42487	2.52143	3.6761	3.99234	3.58441	3.79547	3.80082	4.04778	4.02354	4.21144	4.08417	3.95019	3.86731	3.65619	4.78828	4.35773	4.8133	4.88949	4.94384	4.41155	4.43692	4.89464	4.94513	4.43897
0.685	4.3941	4.35364	4.51411	3.71338	2.41724	2.51392	3.6706	3.98736	3.57873	3.79014	3.79742	4.04493	4.02056	4.20961	4.08118	3.94687	3.86411	3.65051	4.78269	4.3514	4.80775	4.88407	4.93851	4.4053	4.43072	4.88922	4.9398	4.43277
0.686	4.38983	4.34928	4.51003	3.70797	2.40961	2.50642	3.6651	3.98239	3.57306	3.78482	3.79402	4.04207	4.01759	4.20777	4.07818	3.94354	3.86092	3.64483	4.7771	4.34506	4.8022	4.87865	4.93318	4.39905	4.42451	4.88381	4.93447	4.42656
0.687	4.38556	4.34491	4.50595	3.70256	2.40198	2.49891	3.6596	3.97741	3.56739	3.77949	3.79062	4.0392	4.01461	4.20592	4.07518	3.94022	3.85772	3.63915	4.7715	4.33872	4.79665	4.87323	4.92785	4.3928	4.41831	4.87839	4.92915	4.42036
0.688	4.38129	4.34055	4.50188	3.69714	2.39435	2.49141	3.6541	3.97243	3.56171	3.77416	3.78722	4.03634	4.01162	4.20406	4.07217	3.93689	3.85452	3.63347	4.76591	4.33239	4.7911	4.86782	4.92252	4.38655	4.4121	4.87297	4.92382	4.41415
0.689	4.37702	4.33618	4.4978	3.69173	2.38672	2.48391	3.6486	3.96745	3.55604	3.76884	3.78382	4.03347	4.00864	4.2022	4.06917	3.93356	3.85132	3.62779	4.76032	4.32605	4.78555	4.8624	4.91719	4.3803	4.40589	4.86755	4.91849	4.40795
0.69	4.37274	4.33182	4.49372	3.68632	2.37909	2.4764	3.6431	3.96248	3.55036	3.76351	3.78041	4.03059	4.00565	4.20033	4.06615	3.93024	3.84812	3.62211	4.75472	4.31971	4.78	4.85698	4.91186	4.37405	4.39969	4.86214	4.91316	4.40174
0.691	4.36847	4.32746	4.48964	3.6809	2.37146	2.4689	3.6376	3.9575	3.54469	3.75819	3.77701	4.02772	4.00266	4.19846	4.06314	3.92691	3.84492	3.61643	4.74913	4.31338	4.77445	4.85156	4.90653	4.3678	4.39348	4.85672	4.90783	4.39553
0.692	4.3642	4.32309	4.48556	3.67549	2.36383	2.46139	3.63209	3.95252	3.53901	3.75286	3.7736	4.02484	3.99967	4.19658	4.06013	3.92358	3.84172	3.61075	4.74354	4.30704	4.7689	4.84615	4.9012	4.36155	4.38728	4.8513	4.9025	4.38933
0.693	4.35993	4.31873	4.48148	3.67008	2.3562	2.45389	3.62659	3.94755	3.53334	3.74753	3.7702	4.02196	3.99668	4.19469	4.05711	3.92025	3.83851	3.60507	4.73795	4.30071	4.76336	4.84073	4.89587	4.3553	4.38107	4.84588	4.89717	4.38312
0.694	4.35566	4.31436	4.4774	3.66466	2.34857	2.44638	3.62109	3.94257	3.52767	3.74221	3.76679	4.01907	3.99368	4.19279	4.05409	3.91692	3.8353	3.59939	4.73235	4.29437	4.75781	4.83531	4.89054	4.34905	4.37487	4.84047	4.89184	4.37692
0.695	4.35138	4.31	4.47332	3.65925	2.34094	2.43888	3.61559	3.93759	3.52199	3.73688	3.76338	4.01619	3.99068	4.19089	4.05106	3.91359	3.8321	3.59371	4.72676	4.28803	4.75226	4.82989	4.88522	4.34281	4.36866	4.83505	4.88651	4.37071
0.696	4.34711	4.30563	4.46924	3.65384	2.33331	2.43138	3.61009	3.93262	3.51632	3.73155	3.75997	4.0133	3.98768	4.18898	4.04803	3.91026	3.82889	3.58803	4.72117	4.2817	4.74671	4.82448	4.87989	4.33656	4.36246	4.82963	4.88118	4.36451
0.697	4.34284	4.30127	4.46516	3.64842	2.32568	2.42387	3.60459	3.92764	3.51064	3.72623	3.75656	4.0104	3.98468	4.18706	4.045	3.90693	3.82567	3.58235	4.71557	4.27536	4.74116	4.81906	4.87456	4.33031	4.35625	4.82421	4.87585	4.3583
0.698	4.33857	4.29691	4.46108	3.64301	2.31805	2.41637	3.59909	3.92266	3.50497	3.7209	3.75315	4.00751	3.98167	4.18514	4.04197	3.9036	3.82246	3.57667	4.70998	4.26902	4.73561	4.81364	4.86923	4.32406	4.35004	4.8188	4.87052	4.35209
0.699	4.33429	4.29254	4.457	3.6376	2.31042	2.40886	3.59359	3.91768	3.49929	3.71558	3.74973	4.00461	3.97866	4.18321	4.03893	3.90027	3.81925	3.57099	4.70439	4.26269	4.73006	4.80822	4.8639	4.31781	4.34384	4.81338	4.86519	4.34589
0.7	4.33002	4.28818	4.45292	3.63218	2.30279	2.40136	3.58809	3.91271	3.49362	3.71025	3.74632	4.00171	3.97565	4.18127	4.0359	3.89694	3.81603	3.56531	4.6988	4.25635	4.72451	4.80281	4.85857	4.31156	4.33763	4.80796	4.85986	4.33968
0.701	4.32575	4.28381	4.44884	3.62677	2.29516	2.39386	3.58259	3.90773	3.48795	3.70492	3.7429	3.99881	3.97264	4.17933	4.03285	3.8936	3.81282	3.55963	4.6932	4.25001	4.71896	4.79739	4.85324	4.30531	4.33143	4.80254	4.85453	4.33348
0.702	4.32148	4.27945	4.44476	3.62136	2.28753	2.38635	3.57709	3.90275	3.48227	3.6996	3.73949	3.9959	3.96962	4.17738	4.02981	3.89027	3.8096	3.55395	4.68761	4.24368	4.71341	4.79197	4.84791	4.29906	4.32522	4.79713	4.8492	4.32727
0.703	4.31721	4.27509	4.44068	3.61594	2.2799	2.37885	3.57159	3.89778	3.4766	3.69427	3.73607	3.99299	3.9666	4.17543	4.02676	3.88694	3.80638	3.54827	4.68202	4.23734	4.70787	4.78655	4.84258	4.29281	4.31902	4.79171	4.84387	4.32107
0.704	4.31293	4.27072	4.4366	3.61053	2.27227	2.37134	3.56609	3.8928	3.47092	3.68894	3.73265	3.99008	3.96358	4.17347	4.02372	3.8836	3.80316	3.54259	4.67642	4.231	4.70232	4.78114	4.83725	4.28656	4.31281	4.78629	4.83854	4.31486
0.705	4.30866	4.26636	4.43252	3.60512	2.26464	2.36384	3.56059	3.88782	3.46525	3.68362	3.72923	3.98716	3.96056	4.1715	4.02066	3.88027	3.79993	3.53691	4.67083	4.22467	4.69677	4.77572	4.83192	4.28031	4.30661	4.78087	4.83321	4.30865
0.706	4.30439	4.26199	4.42844	3.5997	2.25701	2.35633	3.55509	3.88284	3.45957	3.67829	3.72581	3.98425	3.95754	4.16952	4.01761	3.87693	3.79671	3.53123	4.66524	4.21833	4.69122	4.7703	4.82659	4.27407	4.3004	4.77546	4.82788	4.30245
0.707	4.30012	4.25763	4.42437	3.59429	2.24938	2.34883	3.54959	3.87787	3.4539	3.67297	3.72239	3.98133	3.95451	4.16754	4.01455	3.8736	3.79349	3.52555	4.65965	4.21199	4.68567	4.76488	4.82126	4.26782	4.29419	4.77004	4.82255	4.29624
0.708	4.29584	4.25326	4.42029	3.58888	2.24175	2.34133	3.54409	3.87289	3.44823	3.66764	3.71897	3.97841	3.95148	4.16556	4.01149	3.87026	3.79026	3.51987	4.65405	4.20566	4.68012	4.75947	4.81593	4.26157	4.28799	4.76462	4.81722	4.29004
0.709	4.29157	4.2489	4.41621	3.58346	2.23412	2.33382	3.53859	3.86791	3.44255	3.66231	3.71555	3.97548	3.94845	4.16356	4.00843	3.86692	3.78703	3.51419	4.64846	4.19932	4.67457	4.75405	4.8106	4.25532	4.28178	4.7592	4.81189	4.28383
0.71	4.2873	4.24454	4.41213	3.57805	2.22649	2.32632	3.53309	3.86294	3.43688	3.65699	3.71212	3.97255	3.94542	4.16156	4.00537	3.86359	3.7838	3.50851	4.64287	4.19298	4.66902	4.74863	4.80527	4.24907	4.27558	4.75379	4.80656	4.27763
0.711	4.28303	4.24017	4.40805	3.57264	2.21886	2.31881	3.52759	3.85796	3.4312	3.65166	3.7087	3.96962	3.94238	4.15956	4.0023	3.86025	3.78057	3.50283	4.63727	4.18665	4.66347	4.74321	4.79994	4.24282	4.26937	4.74837	4.80123	4.27142
0.712	4.27876	4.23581	4.40397	3.56722	2.21123	2.31131	3.52209	3.85298	3.42553	3.64633	3.70527	3.96669	3.93935	4.15755	3.99923	3.85691	3.77734	3.49715	4.63168	4.18031	4.65792	4.7378	4.79461	4.23657	4.26317	4.74295	4.7959	4.26521
0.713	4.27448	4.23144	4.39989	3.56181	2.2036	2.30381	3.51659	3.84801	3.41985	3.64101	3.70184	3.96376	3.93631	4.15553	3.99616	3.85357	3.77411	3.49147	4.62609	4.17397	4.65238	4.73238	4.78928	4.23032	4.25696	4.73753	4.79057	4.25901
0.714	4.27021	4.22708	4.39581	3.55639	2.19597	2.2963	3.51109	3.84303	3.41418	3.63568	3.69841	3.96082	3.93327	4.15351	3.99308	3.85023	3.77088	3.48579	4.6205	4.16764	4.64683	4.72696	4.78395	4.22407	4.25076	4.73212	4.78524	4.2528
0.715	4.26594	4.22271	4.39173	3.55098	2.18834	2.2888	3.50558	3.83805	3.4085	3.63035	3.69499	3.95788	3.93022	4.15148	3.99001	3.84689	3.76764	3.48011	4.6149	4.1613	4.64128	4.72154	4.77862	4.21782	4.24455	4.7267	4.77991	4.2466
0.716	4.26167	4.21835	4.38765	3.54557	2.18071	2.28129	3.50008	3.83307	3.40283	3.62503	3.69156	3.95494	3.92718	4.14944	3.98693	3.84355	3.76441	3.47443	4.60931	4.15497	4.63573	4.71613	4.77329	4.21157	4.23834	4.72128	4.77458	4.24039
0.717	4.25739	4.21399	4.38357	3.54015	2.17308	2.27379	3.49458	3.8281	3.39716	3.6197	3.68813	3.95199	3.92413	4.1474	3.98385	3.84021	3.76117	3.46874	4.60372	4.14863	4.63018	4.71071	4.76796	4.20533	4.23214	4.71586	4.76925	4.23419
0.718	4.25312	4.20962	4.37949	3.53474	2.16545	2.26628	3.48908	3.82312	3.39148	3.61438	3.68469	3.94904	3.92108	4.14535	3.98076	3.83687	3.75793	3.46306	4.59812	4.14229	4.62463	4.70529	4.76263	4.19908	4.22593	4.71045	4.76392	4.22798
0.719	4.24885	4.20526	4.37541	3.52933	2.15782	2.25878	3.48358	3.81814	3.38581	3.60905	3.68126	3.9461	3.91803	4.1433	3.97767	3.83353	3.75469	3.45738	4.59253	4.13596	4.61908	4.69987	4.7573	4.19283	4.21973	4.70503	4.75859	4.22177
0.72	4.24458	4.20089	4.37133	3.52391	2.15019	2.25128	3.47808	3.81317	3.38013	3.60372	3.67783	3.94314	3.91498	4.14124	3.97459	3.83019	3.75145	3.4517	4.58694	4.12962	4.61353	4.69446	4.75197	4.18658	4.21352	4.69961	4.75327	4.21557
0.721	4.24031	4.19653	4.36725	3.5185	2.14256	2.24377	3.47258	3.80819	3.37446	3.5984	3.67439	3.94019	3.91192	4.13918	3.97149	3.82685	3.74821	3.44602	4.58135	4.12328	4.60798	4.68904	4.74664	4.18033	4.20732	4.69419	4.74794	4.20936
0.722	4.23603	4.19217	4.36317	3.51309	2.13493	2.23627	3.46708	3.80321	3.36878	3.59307	3.67096	3.93723	3.90887	4.1371	3.9684	3.82351	3.74497	3.44034	4.57575	4.11695	4.60243	4.68362	4.74131	4.17408	4.20111	4.68878	4.74261	4.20316
0.723	4.23176	4.1878	4.35909	3.50767	2.1273	2.22876	3.46158	3.79823	3.36311	3.58774	3.66752	3.93427	3.90581	4.13503	3.96531	3.82016	3.74172	3.43466	4.57016	4.11061	4.59688	4.6782	4.73598	4.16783	4.19491	4.68336	4.73728	4.19695
0.724	4.22749	4.18344	4.35501	3.50226	2.11967	2.22126	3.45608	3.79326	3.35744	3.58242	3.66408	3.93131	3.90275	4.13295	3.96221	3.81682	3.73848	3.42898	4.56457	4.10427	4.59134	4.67279	4.73065	4.16158	4.1887	4.67794	4.73195	4.19075
0.725	4.22322	4.17907	4.35093	3.49685	2.11204	2.21376	3.45058	3.78828	3.35176	3.57709	3.66065	3.92835	3.89968	4.13086	3.95911	3.81348	3.73523	3.4233	4.55897	4.09794	4.58579	4.66737	4.72532	4.15533	4.18249	4.67252	4.72662	4.18454
0.726	4.21895	4.17471	4.34686	3.49143	2.10441	2.20625	3.44508	3.7833	3.34609	3.57177	3.65721	3.92538	3.89662	4.12877	3.95601	3.81013	3.73198	3.41762	4.55338	4.0916	4.58024	4.66195	4.71999	4.14908	4.17629	4.66711	4.72129	4.17833
0.727	4.21467	4.17034	4.34278	3.48602	2.09678	2.19875	3.43958	3.77833	3.34041	3.56644	3.65377	3.92242	3.89355	4.12667	3.9529	3.80679	3.72873	3.41194	4.54779	4.08526	4.57469	4.65653	4.71466	4.14283	4.17008	4.66169	4.71596	4.17213
0.728	4.2104	4.16598	4.3387	3.48061	2.08915	2.19124	3.43408	3.77335	3.33474	3.56111	3.65033	3.91945	3.89048	4.12456	3.9498	3.80344	3.72548	3.40626	4.5422	4.07893	4.56914	4.65112	4.70933	4.13659	4.16388	4.65627	4.71063	4.16592
0.729	4.20613	4.16162	4.33462	3.47519	2.08152	2.18374	3.42858	3.76837	3.32906	3.55579	3.64689	3.91647	3.88741	4.12245	3.94669	3.8001	3.72223	3.40058	4.5366	4.07259	4.56359	4.6457	4.704	4.13034	4.15767	4.65085	4.7053	4.15972
0.73	4.20186	4.15725	4.33054	3.46978	2.07389	2.17623	3.42308	3.7634	3.32339	3.55046	3.64345	3.9135	3.88434	4.12034	3.94358	3.79675	3.71898	3.3949	4.53101	4.06625	4.55804	4.64028	4.69867	4.12409	4.15147	4.64544	4.69997	4.15351
0.731	4.19758	4.15289	4.32646	3.46437	2.06626	2.16873	3.41758	3.75842	3.31772	3.54513	3.64	3.91052	3.88127	4.11822	3.94046	3.79341	3.71573	3.38922	4.52542	4.05992	4.55249	4.63486	4.69334	4.11784	4.14526	4.64002	4.69464	4.14731
0.732	4.19331	4.14852	4.32238	3.45895	2.05863	2.16123	3.41208	3.75344	3.31204	3.53981	3.63656	3.90754	3.87819	4.11609	3.93735	3.79006	3.71248	3.38354	4.51982	4.05358	4.54694	4.62945	4.68801	4.11159	4.13906	4.6346	4.68931	4.1411
0.733	4.18904	4.14416	4.3183	3.45354	2.051	2.15372	3.40658	3.74846	3.30637	3.53448	3.63311	3.90456	3.87512	4.11396	3.93423	3.78671	3.70922	3.37786	4.51423	4.04724	4.54139	4.62403	4.68268	4.10534	4.13285	4.62918	4.68398	4.13489
0.734	4.18477	4.1398	4.31422	3.44813	2.04337	2.14622	3.40108	3.74349	3.30069	3.52916	3.62967	3.90158	3.87204	4.11182	3.93111	3.78337	3.70596	3.37218	4.50864	4.04091	4.53585	4.61861	4.67735	4.09909	4.12664	4.62377	4.67865	4.12869
0.735	4.1805	4.13543	4.31014	3.44271	2.03574	2.13871	3.39558	3.73851	3.29502	3.52383	3.62622	3.8986	3.86896	4.10968	3.92799	3.78002	3.70271	3.3665	4.50305	4.03457	4.5303	4.61319	4.67202	4.09284	4.12044	4.61835	4.67332	4.12248
0.736	4.17622	4.13107	4.30606	3.4373	2.02811	2.13121	3.39008	3.73353	3.28934	3.5185	3.62278	3.89561	3.86587	4.10754	3.92487	3.77667	3.69945	3.36082	4.49745	4.02824	4.52475	4.60778	4.66669	4.08659	4.11423	4.61293	4.66799	4.11628
0.737	4.17195	4.1267	4.30198	3.43189	2.02048	2.12371	3.38458	3.72856	3.28367	3.51318	3.61933	3.89262	3.86279	4.10538	3.92174	3.77332	3.69619	3.35514	4.49186	4.0219	4.5192	4.60236	4.66136	4.08034	4.10803	4.60751	4.66266	4.11007
0.738	4.16768	4.12234	4.2979	3.42647	2.01285	2.1162	3.37908	3.72358	3.278	3.50785	3.61588	3.88963	3.8597	4.10322	3.91861	3.76997	3.69293	3.34946	4.48627	4.01556	4.51365	4.59694	4.65603	4.07409	4.10182	4.6021	4.65733	4.10386
0.739	4.16341	4.11797	4.29382	3.42106	2.00522	2.1087	3.37357	3.7186	3.27232	3.50252	3.61243	3.88663	3.85662	4.10106	3.91548	3.76662	3.68967	3.34378	4.48067	4.00923	4.5081	4.59152	4.65071	4.06785	4.09562	4.59668	4.652	4.09766
0.74	4.15913	4.11361	4.28974	3.41565	1.99759	2.10119	3.36807	3.71363	3.26665	3.4972	3.60898	3.88364	3.85353	4.09889	3.91235	3.76328	3.68641	3.3381	4.47508	4.00289	4.50255	4.58611	4.64538	4.0616	4.08941	4.59126	4.64667	4.09145
0.741	4.15486	4.10925	4.28566	3.41023	1.98996	2.09369	3.36257	3.70865	3.26097	3.49187	3.60553	3.88064	3.85043	4.09672	3.90922	3.75993	3.68314	3.33242	4.46949	3.99655	4.497	4.58069	4.64005	4.05535	4.0832	4.58584	4.64134	4.08525
0.742	4.15059	4.10488	4.28158	3.40482	1.98233	2.08618	3.35707	3.70367	3.2553	3.48655	3.60208	3.87764	3.84734	4.09454	3.90608	3.75658	3.67988	3.32674	4.4639	3.99022	4.49145	4.57527	4.63472	4.0491	4.077	4.58043	4.63601	4.07904
0.743	4.14632	4.10052	4.2775	3.3994	1.9747	2.07868	3.35157	3.69869	3.24962	3.48122	3.59863	3.87464	3.84425	4.09236	3.90295	3.75322	3.67661	3.32106	4.4583	3.98388	4.4859	4.56985	4.62939	4.04285	4.07079	4.57501	4.63068	4.07284
0.744	4.14205	4.09615	4.27342	3.39399	1.96708	2.07118	3.34607	3.69372	3.24395	3.47589	3.59518	3.87164	3.84115	4.09017	3.89981	3.74987	3.67335	3.31538	4.45271	3.97754	4.48036	4.56444	4.62406	4.0366	4.06459	4.56959	4.62535	4.06663
0.745	4.13777	4.09179	4.26935	3.38858	1.95945	2.06367	3.34057	3.68874	3.23828	3.47057	3.59172	3.86863	3.83805	4.08798	3.89667	3.74652	3.67008	3.3097	4.44712	3.97121	4.47481	4.55902	4.61873	4.03035	4.05838	4.56417	4.62002	4.06042
0.746	4.1335	4.08742	4.26527	3.38316	1.95182	2.05617	3.33507	3.68376	3.2326	3.46524	3.58827	3.86562	3.83496	4.08578	3.89352	3.74317	3.66681	3.30402	4.44152	3.96487	4.46926	4.5536	4.6134	4.0241	4.05218	4.55876	4.61469	4.05422
0.747	4.12923	4.08306	4.26119	3.37775	1.94419	2.04866	3.32957	3.67879	3.22693	3.45991	3.58481	3.86262	3.83185	4.08358	3.89038	3.73982	3.66354	3.29834	4.43593	3.95853	4.46371	4.54818	4.60807	4.01785	4.04597	4.55334	4.60936	4.04801
0.748	4.12496	4.0787	4.25711	3.37234	1.93656	2.04116	3.32407	3.67381	3.22125	3.45459	3.58136	3.8596	3.82875	4.08137	3.88723	3.73647	3.66027	3.29266	4.43034	3.9522	4.45816	4.54277	4.60274	4.0116	4.03977	4.54792	4.60403	4.04181
0.749	4.12069	4.07433	4.25303	3.36692	1.92893	2.03366	3.31857	3.66883	3.21558	3.44926	3.5779	3.85659	3.82565	4.07916	3.88408	3.73311	3.657	3.28698	4.42475	3.94586	4.45261	4.53735	4.59741	4.00535	4.03356	4.54251	4.5987	4.0356
0.75	4.11641	4.06997	4.24895	3.36151	1.9213	2.02615	3.31307	3.66385	3.2099	3.44394	3.57444	3.85358	3.82254	4.07694	3.88093	3.72976	3.65373	3.2813	4.41915	3.93952	4.44706	4.53193	4.59208	3.99911	4.02735	4.53709	4.59337	4.0294
0.751	4.11214	4.0656	4.24487	3.3561	1.91367	2.01865	3.30757	3.65888	3.20423	3.43861	3.57099	3.85056	3.81944	4.07472	3.87778	3.72641	3.65046	3.27562	4.41356	3.93319	4.44151	4.52651	4.58675	3.99286	4.02115	4.53167	4.58804	4.02319
0.752	4.10787	4.06124	4.24079	3.35068	1.90604	2.01114	3.30207	3.6539	3.19855	3.43328	3.56753	3.84754	3.81633	4.07249	3.87463	3.72305	3.64718	3.26994	4.40797	3.92685	4.43596	4.5211	4.58142	3.98661	4.01494	4.52625	4.58271	4.01698
0.753	4.1036	4.05688	4.23671	3.34527	1.89841	2.00364	3.29657	3.64892	3.19288	3.42796	3.56407	3.84452	3.81322	4.07026	3.87147	3.7197	3.64391	3.26426	4.40237	3.92051	4.43041	4.51568	4.57609	3.98036	4.00874	4.52084	4.57739	4.01078
0.754	4.09932	4.05251	4.23263	3.33986	1.89078	1.99613	3.29107	3.64395	3.18721	3.42263	3.56061	3.8415	3.81011	4.06802	3.86831	3.71635	3.64063	3.25857	4.39678	3.91418	4.42487	4.51026	4.57076	3.97411	4.00253	4.51542	4.57206	4.00457
0.755	4.09505	4.04815	4.22855	3.33444	1.88315	1.98863	3.28557	3.63897	3.18153	3.4173	3.55715	3.83848	3.80699	4.06578	3.86515	3.71299	3.63736	3.25289	4.39119	3.90784	4.41932	4.50484	4.56543	3.96786	3.99633	4.51	4.56673	3.99837
0.756	4.09078	4.04378	4.22447	3.32903	1.87552	1.98113	3.28007	3.63399	3.17586	3.41198	3.55369	3.83545	3.80388	4.06353	3.86199	3.70964	3.63408	3.24721	4.38559	3.9015	4.41377	4.49943	4.5601	3.96161	3.99012	4.50458	4.5614	3.99216
0.757	4.08651	4.03942	4.22039	3.32362	1.86789	1.97362	3.27457	3.62902	3.17018	3.40665	3.55023	3.83242	3.80076	4.06128	3.85883	3.70628	3.6308	3.24153	4.38	3.89517	4.40822	4.49401	4.55477	3.95536	3.98392	4.49917	4.55607	3.98596
0.758	4.08224	4.03505	4.21631	3.3182	1.86026	1.96612	3.26907	3.62404	3.16451	3.40132	3.54676	3.82939	3.79764	4.05903	3.85566	3.70293	3.62752	3.23585	4.37441	3.88883	4.40267	4.48859	4.54944	3.94911	3.97771	4.49375	4.55074	3.97975
0.759	4.07796	4.03069	4.21223	3.31279	1.85263	1.95861	3.26357	3.61906	3.15883	3.396	3.5433	3.82636	3.79453	4.05677	3.8525	3.69957	3.62425	3.23017	4.36882	3.8825	4.39712	4.48317	4.54411	3.94286	3.9715	4.48833	4.54541	3.97354
0.76	4.07369	4.02633	4.20815	3.30738	1.845	1.95111	3.25807	3.61408	3.15316	3.39067	3.53984	3.82333	3.79141	4.0545	3.84933	3.69621	3.62096	3.22449	4.36322	3.87616	4.39157	4.47776	4.53878	3.93661	3.9653	4.48291	4.54008	3.96734
0.761	4.06942	4.02196	4.20407	3.30196	1.83737	1.94361	3.25257	3.60911	3.14749	3.38535	3.53637	3.8203	3.78828	4.05223	3.84616	3.69286	3.61768	3.21881	4.35763	3.86982	4.38602	4.47234	4.53345	3.93037	3.95909	4.4775	4.53475	3.96113
0.762	4.06515	4.0176	4.19999	3.29655	1.82974	1.9361	3.24706	3.60413	3.14181	3.38002	3.53291	3.81726	3.78516	4.04996	3.84299	3.6895	3.6144	3.21313	4.35204	3.86349	4.38047	4.46692	4.52812	3.92412	3.95289	4.47208	4.52942	3.95493
0.763	4.06087	4.01323	4.19591	3.29114	1.82211	1.9286	3.24156	3.59915	3.13614	3.37469	3.52944	3.81422	3.78204	4.04768	3.83982	3.68614	3.61112	3.20745	4.34644	3.85715	4.37492	4.4615	4.52279	3.91787	3.94668	4.46666	4.52409	3.94872
0.764	4.0566	4.00887	4.19184	3.28572	1.81448	1.92109	3.23606	3.59418	3.13046	3.36937	3.52598	3.81118	3.77891	4.0454	3.83664	3.68279	3.60783	3.20177	4.34085	3.85081	4.36937	4.45609	4.51746	3.91162	3.94048	4.46124	4.51876	3.94252
0.765	4.05233	4.00451	4.18776	3.28031	1.80685	1.91359	3.23056	3.5892	3.12479	3.36404	3.52251	3.80814	3.77578	4.04312	3.83347	3.67943	3.60455	3.19609	4.33526	3.84448	4.36383	4.45067	4.51213	3.90537	3.93427	4.45583	4.51343	3.93631
0.766	4.04806	4.00014	4.18368	3.2749	1.79922	1.90608	3.22506	3.58422	3.11911	3.35871	3.51904	3.8051	3.77265	4.04082	3.83029	3.67607	3.60126	3.19041	4.32967	3.83814	4.35828	4.44525	4.5068	3.89912	3.92807	4.45041	4.5081	3.9301
0.767	4.04379	3.99578	4.1796	3.26948	1.79159	1.89858	3.21956	3.57924	3.11344	3.35339	3.51557	3.80205	3.76952	4.03853	3.82711	3.67271	3.59798	3.18473	4.32407	3.8318	4.35273	4.43983	4.50147	3.89287	3.92186	4.44499	4.50277	3.9239
0.768	4.03951	3.99141	4.17552	3.26407	1.78396	1.89108	3.21406	3.57427	3.10777	3.34806	3.51211	3.79901	3.76639	4.03623	3.82393	3.66935	3.59469	3.17905	4.31848	3.82547	4.34718	4.43442	4.49614	3.88662	3.91565	4.43957	4.49744	3.91769
0.769	4.03524	3.98705	4.17144	3.25866	1.77633	1.88357	3.20856	3.56929	3.10209	3.34274	3.50864	3.79596	3.76326	4.03393	3.82075	3.666	3.5914	3.17337	4.31289	3.81913	4.34163	4.429	4.49081	3.88037	3.90945	4.43416	4.49211	3.91149
0.77	4.03097	3.98268	4.16736	3.25324	1.7687	1.87607	3.20306	3.56431	3.09642	3.33741	3.50517	3.79291	3.76012	4.03162	3.81756	3.66264	3.58811	3.16769	4.30729	3.81279	4.33608	4.42358	4.48548	3.87412	3.90324	4.42874	4.48678	3.90528
0.771	4.0267	3.97832	4.16328	3.24783	1.76107	1.86856	3.19756	3.55934	3.09074	3.33208	3.5017	3.78986	3.75699	4.02931	3.81438	3.65928	3.58482	3.16201	4.3017	3.80646	4.33053	4.41816	4.48015	3.86787	3.89704	4.42332	4.48145	3.89908
0.772	4.02242	3.97396	4.1592	3.24241	1.75344	1.86106	3.19206	3.55436	3.08507	3.32676	3.49823	3.78681	3.75385	4.02699	3.81119	3.65592	3.58153	3.15633	4.29611	3.80012	4.32498	4.41275	4.47482	3.86162	3.89083	4.4179	4.47612	3.89287
0.773	4.01815	3.96959	4.15512	3.237	1.74581	1.85356	3.18656	3.54938	3.07939	3.32143	3.49476	3.78375	3.75071	4.02467	3.808	3.65256	3.57824	3.15065	4.29052	3.79378	4.31943	4.40733	4.46949	3.85538	3.88463	4.41249	4.47079	3.88666
0.774	4.01388	3.96523	4.15104	3.23159	1.73818	1.84605	3.18106	3.54441	3.07372	3.3161	3.49128	3.7807	3.74757	4.02234	3.80481	3.6492	3.57495	3.14497	4.28492	3.78745	4.31388	4.40191	4.46416	3.84913	3.87842	4.40707	4.46546	3.88046
0.775	4.00961	3.96086	4.14696	3.22617	1.73055	1.83855	3.17556	3.53943	3.06805	3.31078	3.48781	3.77764	3.74443	4.02001	3.80162	3.64584	3.57166	3.13929	4.27933	3.78111	4.30834	4.39649	4.45883	3.84288	3.87222	4.40165	4.46013	3.87425
0.776	4.00534	3.9565	4.14288	3.22076	1.72292	1.83104	3.17006	3.53445	3.06237	3.30545	3.48434	3.77458	3.74129	4.01768	3.79843	3.64248	3.56837	3.13361	4.27374	3.77477	4.30279	4.39108	4.4535	3.83663	3.86601	4.39623	4.4548	3.86805
0.777	4.00106	3.95213	4.1388	3.21535	1.71529	1.82354	3.16456	3.52947	3.0567	3.30013	3.48086	3.77152	3.73815	4.01534	3.79523	3.63911	3.56507	3.12793	4.26814	3.76844	4.29724	4.38566	4.44817	3.83038	3.8598	4.39082	4.44947	3.86184
0.778	3.99679	3.94777	4.13472	3.20993	1.70766	1.81603	3.15906	3.5245	3.05102	3.2948	3.47739	3.76846	3.735	4.013	3.79203	3.63575	3.56178	3.12225	4.26255	3.7621	4.29169	4.38024	4.44284	3.82413	3.8536	4.3854	4.44414	3.85564
0.779	3.99252	3.94341	4.13064	3.20452	1.70003	1.80853	3.15356	3.51952	3.04535	3.28947	3.47391	3.76539	3.73186	4.01066	3.78884	3.63239	3.55848	3.11657	4.25696	3.75576	4.28614	4.37482	4.43751	3.81788	3.84739	4.37998	4.43881	3.84943
0.78	3.98825	3.93904	4.12656	3.19911	1.6924	1.80103	3.14806	3.51454	3.03967	3.28415	3.47044	3.76233	3.72871	4.00831	3.78564	3.62903	3.55519	3.11089	4.25137	3.74943	4.28059	4.36941	4.43218	3.81163	3.84119	4.37456	4.43348	3.84322
0.781	3.98398	3.93468	4.12248	3.19369	1.68477	1.79352	3.14256	3.50957	3.034	3.27882	3.46696	3.75926	3.72556	4.00596	3.78244	3.62567	3.55189	3.10521	4.24577	3.74309	4.27504	4.36399	4.42685	3.80538	3.83498	4.36915	4.42815	3.83702
0.782	3.9797	3.93031	4.1184	3.18828	1.67714	1.78602	3.13706	3.50459	3.02832	3.27349	3.46349	3.7562	3.72241	4.0036	3.77924	3.62231	3.54859	3.09953	4.24018	3.73676	4.26949	4.35857	4.42152	3.79913	3.82878	4.36373	4.42282	3.83081
0.783	3.97543	3.92595	4.11433	3.18287	1.66951	1.77851	3.13156	3.49961	3.02265	3.26817	3.46001	3.75313	3.71926	4.00124	3.77603	3.61894	3.54529	3.09385	4.23459	3.73042	4.26394	4.35315	4.41619	3.79288	3.82257	4.35831	4.41749	3.82461
0.784	3.97116	3.92159	4.11025	3.17745	1.66188	1.77101	3.12605	3.49464	3.01698	3.26284	3.45653	3.75006	3.71611	3.99887	3.77283	3.61558	3.54199	3.08817	4.22899	3.72408	4.25839	4.34774	4.41087	3.78664	3.81637	4.35289	4.41216	3.8184
0.785	3.96689	3.91722	4.10617	3.17204	1.65425	1.76351	3.12055	3.48966	3.0113	3.25752	3.45306	3.74698	3.71296	3.9965	3.76962	3.61222	3.53869	3.08249	4.2234	3.71775	4.25285	4.34232	4.40554	3.78039	3.81016	4.34748	4.40683	3.8122
0.786	3.96261	3.91286	4.10209	3.16663	1.64662	1.756	3.11505	3.48468	3.00563	3.25219	3.44958	3.74391	3.70981	3.99413	3.76641	3.60885	3.53539	3.07681	4.21781	3.71141	4.2473	4.3369	4.40021	3.77414	3.80395	4.34206	4.40151	3.80599
0.787	3.95834	3.90849	4.09801	3.16121	1.63899	1.7485	3.10955	3.4797	2.99995	3.24686	3.4461	3.74083	3.70665	3.99175	3.76321	3.60549	3.53209	3.07113	4.21222	3.70507	4.24175	4.33148	4.39488	3.76789	3.79775	4.33664	4.39618	3.79978
0.788	3.95407	3.90413	4.09393	3.1558	1.63136	1.74099	3.10405	3.47473	2.99428	3.24154	3.44262	3.73776	3.70349	3.98937	3.76	3.60213	3.52879	3.06545	4.20662	3.69874	4.2362	4.32607	4.38955	3.76164	3.79154	4.33122	4.39085	3.79358
0.789	3.9498	3.89976	4.08985	3.15039	1.62373	1.73349	3.09855	3.46975	2.9886	3.23621	3.43914	3.73468	3.70034	3.98699	3.75678	3.59876	3.52549	3.05977	4.20103	3.6924	4.23065	4.32065	4.38422	3.75539	3.78534	4.32581	4.38552	3.78737
0.79	3.94553	3.8954	4.08577	3.14497	1.6161	1.72598	3.09305	3.46477	2.98293	3.23088	3.43566	3.7316	3.69718	3.9846	3.75357	3.5954	3.52219	3.05408	4.19544	3.68606	4.2251	4.31523	4.37889	3.74914	3.77913	4.32039	4.38019	3.78117
0.791	3.94125	3.89104	4.08169	3.13956	1.60847	1.71848	3.08755	3.4598	2.97726	3.22556	3.43218	3.72852	3.69402	3.98221	3.75036	3.59203	3.51888	3.0484	4.18984	3.67973	4.21955	4.30981	4.37356	3.74289	3.77293	4.31497	4.37486	3.77496
0.792	3.93698	3.88667	4.07761	3.13415	1.60084	1.71098	3.08205	3.45482	2.97158	3.22023	3.4287	3.72544	3.69086	3.97982	3.74714	3.58867	3.51558	3.04272	4.18425	3.67339	4.214	4.3044	4.36823	3.73664	3.76672	4.30955	4.36953	3.76876
0.793	3.93271	3.88231	4.07353	3.12873	1.59321	1.70347	3.07655	3.44984	2.96591	3.2149	3.42521	3.72236	3.68769	3.97742	3.74393	3.5853	3.51227	3.03704	4.17866	3.66705	4.20845	4.29898	4.3629	3.73039	3.76051	4.30414	4.3642	3.76255
0.794	3.92844	3.87794	4.06945	3.12332	1.58558	1.69597	3.07105	3.44486	2.96023	3.20958	3.42173	3.71927	3.68453	3.97501	3.74071	3.58194	3.50897	3.03136	4.17307	3.66072	4.2029	4.29356	4.35757	3.72414	3.75431	4.29872	4.35887	3.75634
0.795	3.92416	3.87358	4.06537	3.11791	1.57795	1.68846	3.06555	3.43989	2.95456	3.20425	3.41825	3.71619	3.68137	3.97261	3.73749	3.57857	3.50566	3.02568	4.16747	3.65438	4.19735	4.28814	4.35224	3.7179	3.7481	4.2933	4.35354	3.75014
0.796	3.91989	3.86922	4.06129	3.11249	1.57032	1.68096	3.06005	3.43491	2.94888	3.19893	3.41477	3.7131	3.6782	3.9702	3.73427	3.57521	3.50235	3.02	4.16188	3.64804	4.19181	4.28273	4.34691	3.71165	3.7419	4.28788	4.34821	3.74393
0.797	3.91562	3.86485	4.05721	3.10708	1.56269	1.67345	3.05455	3.42993	2.94321	3.1936	3.41128	3.71001	3.67504	3.96779	3.73105	3.57184	3.49905	3.01432	4.15629	3.64171	4.18626	4.27731	4.34158	3.7054	3.73569	4.28247	4.34288	3.73773
0.798	3.91135	3.86049	4.05313	3.10166	1.55506	1.66595	3.04905	3.42496	2.93754	3.18827	3.4078	3.70692	3.67187	3.96537	3.72782	3.56847	3.49574	3.00864	4.15069	3.63537	4.18071	4.27189	4.33625	3.69915	3.72949	4.27705	4.33755	3.73152
0.799	3.90708	3.85612	4.04905	3.09625	1.54743	1.65845	3.04355	3.41998	2.93186	3.18295	3.40431	3.70383	3.6687	3.96295	3.7246	3.56511	3.49243	3.00296	4.1451	3.62903	4.17516	4.26647	4.33092	3.6929	3.72328	4.27163	4.33222	3.72531
0.8	3.9028	3.85176	4.04497	3.09084	1.5398	1.65094	3.03805	3.415	2.92619	3.17762	3.40083	3.70074	3.66553	3.96052	3.72137	3.56174	3.48912	2.99728	4.13951	3.6227	4.16961	4.26106	4.32559	3.68665	3.71708	4.26621	4.32689	3.71911
0.801	3.89853	3.84739	4.04089	3.08542	1.53217	1.64344	3.03255	3.41003	2.92051	3.17229	3.39734	3.69764	3.66236	3.9581	3.71815	3.55837	3.48581	2.9916	4.13392	3.61636	4.16406	4.25564	4.32026	3.6804	3.71087	4.2608	4.32156	3.7129
0.802	3.89426	3.84303	4.03682	3.08001	1.52454	1.63593	3.02705	3.40505	2.91484	3.16697	3.39386	3.69455	3.65919	3.95567	3.71492	3.55501	3.4825	2.98592	4.12832	3.61002	4.15851	4.25022	4.31493	3.67415	3.70466	4.25538	4.31623	3.7067
0.803	3.88999	3.83867	4.03274	3.0746	1.51691	1.62843	3.02155	3.40007	2.90916	3.16164	3.39037	3.69145	3.65601	3.95323	3.71169	3.55164	3.47919	2.98024	4.12273	3.60369	4.15296	4.2448	4.3096	3.6679	3.69846	4.24996	4.3109	3.70049
0.804	3.88572	3.8343	4.02866	3.06918	1.50928	1.62093	3.01605	3.39509	2.90349	3.15632	3.38688	3.68835	3.65284	3.95079	3.70846	3.54827	3.47587	2.97456	4.11714	3.59735	4.14741	4.23939	4.30427	3.66165	3.69225	4.24454	4.30557	3.69429
0.805	3.88144	3.82994	4.02458	3.06377	1.50166	1.61342	3.01055	3.39012	2.89781	3.15099	3.38339	3.68526	3.64967	3.94835	3.70523	3.5449	3.47256	2.96888	4.11154	3.59102	4.14186	4.23397	4.29894	3.6554	3.68605	4.23913	4.30024	3.68808
0.806	3.87717	3.82557	4.0205	3.05836	1.49403	1.60592	3.00505	3.38514	2.89214	3.14566	3.37991	3.68216	3.64649	3.94591	3.702	3.54154	3.46925	2.9632	4.10595	3.58468	4.13632	4.22855	4.29361	3.64916	3.67984	4.23371	4.29491	3.68187
0.807	3.8729	3.82121	4.01642	3.05294	1.4864	1.59841	2.99954	3.38016	2.88647	3.14034	3.37642	3.67905	3.64331	3.94346	3.69876	3.53817	3.46593	2.95752	4.10036	3.57834	4.13077	4.22313	4.28828	3.64291	3.67364	4.22829	4.28958	3.67567
0.808	3.86863	3.81684	4.01234	3.04753	1.47877	1.59091	2.99404	3.37519	2.88079	3.13501	3.37293	3.67595	3.64014	3.94101	3.69553	3.5348	3.46262	2.95184	4.09477	3.57201	4.12522	4.21772	4.28295	3.63666	3.66743	4.22287	4.28425	3.66946
0.809	3.86435	3.81248	4.00826	3.04212	1.47114	1.5834	2.98854	3.37021	2.87512	3.12968	3.36944	3.67285	3.63696	3.93856	3.69229	3.53143	3.45931	2.94616	4.08917	3.56567	4.11967	4.2123	4.27762	3.63041	3.66123	4.21746	4.27892	3.66326
0.81	3.86008	3.80812	4.00418	3.0367	1.46351	1.5759	2.98304	3.36523	2.86944	3.12436	3.36595	3.66974	3.63378	3.9361	3.68905	3.52806	3.45599	2.94048	4.08358	3.55933	4.11412	4.20688	4.27229	3.62416	3.65502	4.21204	4.27359	3.65705
0.811	3.85581	3.80375	4.0001	3.03129	1.45588	1.5684	2.97754	3.36025	2.86377	3.11903	3.36246	3.66664	3.6306	3.93364	3.68582	3.52469	3.45267	2.9348	4.07799	3.553	4.10857	4.20146	4.26696	3.61791	3.64881	4.20662	4.26826	3.65085
0.812	3.85154	3.79939	3.99602	3.02588	1.44825	1.56089	2.97204	3.35528	2.85809	3.11371	3.35897	3.66353	3.62741	3.93117	3.68258	3.52132	3.44936	2.92912	4.07239	3.54666	4.10302	4.19605	4.26163	3.61166	3.64261	4.2012	4.26293	3.64464
0.813	3.84727	3.79502	3.99194	3.02046	1.44062	1.55339	2.96654	3.3503	2.85242	3.10838	3.35548	3.66042	3.62423	3.9287	3.67934	3.51795	3.44604	2.92344	4.0668	3.54032	4.09747	4.19063	4.2563	3.60541	3.6364	4.19579	4.2576	3.63843
0.814	3.84299	3.79066	3.98786	3.01505	1.43299	1.54588	2.96104	3.34532	2.84675	3.10305	3.35199	3.65731	3.62105	3.92623	3.67609	3.51458	3.44272	2.91776	4.06121	3.53399	4.09192	4.18521	4.25097	3.59916	3.6302	4.19037	4.25227	3.63223
0.815	3.83872	3.7863	3.98378	3.00964	1.42536	1.53838	2.95554	3.34035	2.84107	3.09773	3.3485	3.6542	3.61786	3.92376	3.67285	3.51121	3.4394	2.91208	4.05562	3.52765	4.08637	4.17979	4.24564	3.59291	3.62399	4.18495	4.24694	3.62602
0.816	3.83445	3.78193	3.9797	3.00422	1.41773	1.53088	2.95004	3.33537	2.8354	3.0924	3.34501	3.65109	3.61468	3.92128	3.66961	3.50784	3.43609	2.9064	4.05002	3.52131	4.08083	4.17438	4.24031	3.58666	3.61779	4.17953	4.24161	3.61982
0.817	3.83018	3.77757	3.97562	2.99881	1.4101	1.52337	2.94454	3.33039	2.82972	3.08707	3.34151	3.64798	3.61149	3.9188	3.66636	3.50447	3.43277	2.90072	4.04443	3.51498	4.07528	4.16896	4.23498	3.58042	3.61158	4.17412	4.23628	3.61361
0.818	3.8259	3.7732	3.97154	2.9934	1.40247	1.51587	2.93904	3.32542	2.82405	3.08175	3.33802	3.64487	3.60831	3.91632	3.66312	3.5011	3.42945	2.89504	4.03884	3.50864	4.06973	4.16354	4.22965	3.57417	3.60538	4.1687	4.23095	3.60741
0.819	3.82163	3.76884	3.96746	2.98798	1.39484	1.50836	2.93354	3.32044	2.81837	3.07642	3.33453	3.64175	3.60512	3.91383	3.65987	3.49773	3.42613	2.88936	4.03324	3.5023	4.06418	4.15812	4.22432	3.56792	3.59917	4.16328	4.22562	3.6012
0.82	3.81736	3.76447	3.96338	2.98257	1.38721	1.50086	2.92804	3.31546	2.8127	3.07109	3.33103	3.63863	3.60193	3.91134	3.65662	3.49436	3.42281	2.88368	4.02765	3.49597	4.05863	4.15271	4.21899	3.56167	3.59296	4.15786	4.2203	3.59499
0.821	3.81309	3.76011	3.95931	2.97716	1.37958	1.49335	2.92254	3.31048	2.80703	3.06577	3.32754	3.63552	3.59874	3.90885	3.65337	3.49099	3.41948	2.878	4.02206	3.48963	4.05308	4.14729	4.21366	3.55542	3.58676	4.15245	4.21497	3.58879
0.822	3.80882	3.75575	3.95523	2.97174	1.37195	1.48585	2.91704	3.30551	2.80135	3.06044	3.32405	3.6324	3.59555	3.90636	3.65012	3.48762	3.41616	2.87232	4.01647	3.48329	4.04753	4.14187	4.20833	3.54917	3.58055	4.14703	4.20964	3.58258
0.823	3.80454	3.75138	3.95115	2.96633	1.36432	1.47835	2.91154	3.30053	2.79568	3.05512	3.32055	3.62928	3.59236	3.90386	3.64687	3.48425	3.41284	2.86664	4.01087	3.47696	4.04198	4.13645	4.203	3.54292	3.57435	4.14161	4.20431	3.57638
0.824	3.80027	3.74702	3.94707	2.96091	1.35669	1.47084	2.90604	3.29555	2.79	3.04979	3.31706	3.62616	3.58916	3.90135	3.64362	3.48088	3.40952	2.86096	4.00528	3.47062	4.03643	4.13104	4.19767	3.53667	3.56814	4.13619	4.19898	3.57017
0.825	3.796	3.74265	3.94299	2.9555	1.34906	1.46334	2.90054	3.29058	2.78433	3.04446	3.31356	3.62304	3.58597	3.89885	3.64037	3.4775	3.40619	2.85528	3.99969	3.46428	4.03088	4.12562	4.19234	3.53042	3.56194	4.13078	4.19365	3.56397
0.826	3.79173	3.73829	3.93891	2.95009	1.34143	1.45583	2.89504	3.2856	2.77865	3.03914	3.31006	3.61991	3.58277	3.89634	3.63711	3.47413	3.40287	2.84959	3.99409	3.45795	4.02533	4.1202	4.18701	3.52417	3.55573	4.12536	4.18832	3.55776
0.827	3.78745	3.73393	3.93483	2.94467	1.3338	1.44833	2.88954	3.28062	2.77298	3.03381	3.30657	3.61679	3.57958	3.89383	3.63386	3.47076	3.39954	2.84391	3.9885	3.45161	4.01979	4.11478	4.18168	3.51792	3.54953	4.11994	4.18299	3.55155
0.828	3.78318	3.72956	3.93075	2.93926	1.32617	1.44083	2.88404	3.27564	2.76731	3.02848	3.30307	3.61367	3.57638	3.89132	3.6306	3.46739	3.39622	2.83823	3.98291	3.44528	4.01424	4.10937	4.17635	3.51168	3.54332	4.11452	4.17766	3.54535
0.829	3.77891	3.7252	3.92667	2.93385	1.31854	1.43332	2.87854	3.27067	2.76163	3.02316	3.29957	3.61054	3.57319	3.8888	3.62734	3.46402	3.39289	2.83255	3.97732	3.43894	4.00869	4.10395	4.17103	3.50543	3.53711	4.10911	4.17233	3.53914
0.83	3.77464	3.72083	3.92259	2.92843	1.31091	1.42582	2.87303	3.26569	2.75596	3.01783	3.29608	3.60741	3.56999	3.88628	3.62409	3.46064	3.38957	2.82687	3.97172	3.4326	4.00314	4.09853	4.1657	3.49918	3.53091	4.10369	4.167	3.53294
0.831	3.77037	3.71647	3.91851	2.92302	1.30328	1.41831	2.86753	3.26071	2.75028	3.01251	3.29258	3.60429	3.56679	3.88376	3.62083	3.45727	3.38624	2.82119	3.96613	3.42627	3.99759	4.09311	4.16037	3.49293	3.5247	4.09827	4.16167	3.52673
0.832	3.76609	3.7121	3.91443	2.91761	1.29565	1.41081	2.86203	3.25574	2.74461	3.00718	3.28908	3.60116	3.56359	3.88124	3.61757	3.4539	3.38291	2.81551	3.96054	3.41993	3.99204	4.0877	4.15504	3.48668	3.5185	4.09285	4.15634	3.52053
0.833	3.76182	3.70774	3.91035	2.91219	1.28802	1.4033	2.85653	3.25076	2.73893	3.00185	3.28558	3.59803	3.56039	3.87871	3.6143	3.45052	3.37959	2.80983	3.95494	3.41359	3.98649	4.08228	4.14971	3.48043	3.51229	4.08744	4.15101	3.51432
0.834	3.75755	3.70338	3.90627	2.90678	1.28039	1.3958	2.85103	3.24578	2.73326	2.99653	3.28208	3.5949	3.55719	3.87618	3.61104	3.44715	3.37626	2.80415	3.94935	3.40726	3.98094	4.07686	4.14438	3.47418	3.50609	4.08202	4.14568	3.50811
0.835	3.75328	3.69901	3.90219	2.90137	1.27276	1.3883	2.84553	3.24081	2.72758	2.9912	3.27859	3.59177	3.55399	3.87364	3.60778	3.44378	3.37293	2.79847	3.94376	3.40092	3.97539	4.07144	4.13905	3.46793	3.49988	4.0766	4.14035	3.50191
0.836	3.74901	3.69465	3.89811	2.89595	1.26513	1.38079	2.84003	3.23583	2.72191	2.98587	3.27509	3.58863	3.55079	3.87111	3.60452	3.4404	3.3696	2.79279	3.93817	3.39458	3.96984	4.06603	4.13372	3.46168	3.49368	4.07118	4.13502	3.4957
0.837	3.74473	3.69028	3.89403	2.89054	1.2575	1.37329	2.83453	3.23085	2.71624	2.98055	3.27159	3.5855	3.54758	3.86857	3.60125	3.43703	3.36627	2.78711	3.93257	3.38825	3.9643	4.06061	4.12839	3.45543	3.48747	4.06577	4.12969	3.4895
0.838	3.74046	3.68592	3.88995	2.88513	1.24987	1.36578	2.82903	3.22587	2.71056	2.97522	3.26809	3.58237	3.54438	3.86603	3.59799	3.43365	3.36294	2.78143	3.92698	3.38191	3.95875	4.05519	4.12306	3.44918	3.48126	4.06035	4.12436	3.48329
0.839	3.73619	3.68155	3.88587	2.87971	1.24224	1.35828	2.82353	3.2209	2.70489	2.9699	3.26459	3.57923	3.54117	3.86348	3.59472	3.43028	3.35961	2.77575	3.92139	3.37557	3.9532	4.04977	4.11773	3.44293	3.47506	4.05493	4.11903	3.47709
0.84	3.73192	3.67719	3.8818	2.8743	1.23461	1.35078	2.81803	3.21592	2.69921	2.96457	3.26109	3.57609	3.53797	3.86094	3.59145	3.42691	3.35628	2.77007	3.91579	3.36924	3.94765	4.04436	4.1124	3.43669	3.46885	4.04951	4.1137	3.47088
0.841	3.72764	3.67283	3.87772	2.86889	1.22698	1.34327	2.81253	3.21094	2.69354	2.95924	3.25758	3.57296	3.53476	3.85839	3.58818	3.42353	3.35295	2.76439	3.9102	3.3629	3.9421	4.03894	4.10707	3.43044	3.46265	4.0441	4.10837	3.46467
0.842	3.72337	3.66846	3.87364	2.86347	1.21935	1.33577	2.80703	3.20597	2.68786	2.95392	3.25408	3.56982	3.53155	3.85583	3.58492	3.42016	3.34962	2.75871	3.90461	3.35656	3.93655	4.03352	4.10174	3.42419	3.45644	4.03868	4.10304	3.45847
0.843	3.7191	3.6641	3.86956	2.85806	1.21172	1.32826	2.80153	3.20099	2.68219	2.94859	3.25058	3.56668	3.52835	3.85328	3.58165	3.41678	3.34629	2.75303	3.89902	3.35023	3.931	4.0281	4.09641	3.41794	3.45024	4.03326	4.09771	3.45226
0.844	3.71483	3.65973	3.86548	2.85265	1.20409	1.32076	2.79603	3.19601	2.67652	2.94326	3.24708	3.56354	3.52514	3.85072	3.57837	3.41341	3.34296	2.74735	3.89342	3.34389	3.92545	4.02269	4.09108	3.41169	3.44403	4.02784	4.09238	3.44606
0.845	3.71056	3.65537	3.8614	2.84723	1.19646	1.31325	2.79053	3.19103	2.67084	2.93794	3.24358	3.5604	3.52193	3.84816	3.5751	3.41003	3.33962	2.74167	3.88783	3.33755	3.9199	4.01727	4.08575	3.40544	3.43782	4.02243	4.08705	3.43985
0.846	3.70628	3.65101	3.85732	2.84182	1.18883	1.30575	2.78503	3.18606	2.66517	2.93261	3.24007	3.55726	3.51872	3.8456	3.57183	3.40666	3.33629	2.73599	3.88224	3.33122	3.91435	4.01185	4.08042	3.39919	3.43162	4.01701	4.08172	3.43365
0.847	3.70201	3.64664	3.85324	2.83641	1.1812	1.29825	2.77953	3.18108	2.65949	2.92729	3.23657	3.55411	3.51551	3.84303	3.56856	3.40328	3.33296	2.73031	3.87664	3.32488	3.90881	4.00643	4.07509	3.39294	3.42541	4.01159	4.07639	3.42744
0.848	3.69774	3.64228	3.84916	2.83099	1.17357	1.29074	2.77403	3.1761	2.65382	2.92196	3.23307	3.55097	3.51229	3.84046	3.56528	3.39991	3.32962	2.72463	3.87105	3.31854	3.90326	4.00102	4.06976	3.38669	3.41921	4.00617	4.07106	3.42123
0.849	3.69347	3.63791	3.84508	2.82558	1.16594	1.28324	2.76853	3.17113	2.64814	2.91663	3.22956	3.54783	3.50908	3.83789	3.56201	3.39653	3.32629	2.71895	3.86546	3.31221	3.89771	3.9956	4.06443	3.38044	3.413	4.00076	4.06573	3.41503
0.85	3.68919	3.63355	3.841	2.82017	1.15831	1.27573	2.76303	3.16615	2.64247	2.91131	3.22606	3.54468	3.50587	3.83532	3.55873	3.39315	3.32295	2.71327	3.85987	3.30587	3.89216	3.99018	4.0591	3.37419	3.4068	3.99534	4.0604	3.40882
0.851	3.68492	3.62918	3.83692	2.81475	1.15068	1.26823	2.75753	3.16117	2.6368	2.90598	3.22256	3.54153	3.50265	3.83274	3.55545	3.38978	3.31962	2.70759	3.85427	3.29954	3.88661	3.98476	4.05377	3.36795	3.40059	3.98992	4.05507	3.40262
0.852	3.68065	3.62482	3.83284	2.80934	1.14305	1.26073	2.75202	3.1562	2.63112	2.90065	3.21905	3.53839	3.49944	3.83016	3.55218	3.3864	3.31628	2.70191	3.84868	3.2932	3.88106	3.97935	4.04844	3.3617	3.39439	3.9845	4.04974	3.39641
0.853	3.67638	3.62046	3.82876	2.80392	1.13542	1.25322	2.74652	3.15122	2.62545	2.89533	3.21555	3.53524	3.49622	3.82758	3.5489	3.38302	3.31294	2.69623	3.84309	3.28686	3.87551	3.97393	4.04311	3.35545	3.38818	3.97909	4.04442	3.3902
0.854	3.67211	3.61609	3.82468	2.79851	1.12779	1.24572	2.74102	3.14624	2.61977	2.89	3.21204	3.53209	3.49301	3.825	3.54562	3.37965	3.30961	2.69055	3.83749	3.28053	3.86996	3.96851	4.03778	3.3492	3.38197	3.97367	4.03909	3.384
0.855	3.66783	3.61173	3.8206	2.7931	1.12016	1.23821	2.73552	3.14126	2.6141	2.88467	3.20854	3.52894	3.48979	3.82241	3.54234	3.37627	3.30627	2.68487	3.8319	3.27419	3.86441	3.96309	4.03245	3.34295	3.37577	3.96825	4.03376	3.37779
0.856	3.66356	3.60736	3.81652	2.78768	1.11253	1.23071	2.73002	3.13629	2.60842	2.87935	3.20503	3.52579	3.48657	3.81983	3.53906	3.37289	3.30293	2.67919	3.82631	3.26785	3.85886	3.95768	4.02712	3.3367	3.36956	3.96283	4.02843	3.37159
0.857	3.65929	3.603	3.81244	2.78227	1.1049	1.2232	2.72452	3.13131	2.60275	2.87402	3.20153	3.52264	3.48336	3.81724	3.53578	3.36952	3.2996	2.67351	3.82072	3.26152	3.85332	3.95226	4.02179	3.33045	3.36336	3.95742	4.0231	3.36538
0.858	3.65502	3.59863	3.80836	2.77686	1.09727	1.2157	2.71902	3.12633	2.59708	2.8687	3.19802	3.51949	3.48014	3.81464	3.53249	3.36614	3.29626	2.66783	3.81512	3.25518	3.84777	3.94684	4.01646	3.3242	3.35715	3.952	4.01777	3.35918
0.859	3.65074	3.59427	3.80429	2.77144	1.08964	1.2082	2.71352	3.12136	2.5914	2.86337	3.19451	3.51633	3.47692	3.81205	3.52921	3.36276	3.29292	2.66215	3.80953	3.24884	3.84222	3.94142	4.01113	3.31795	3.35095	3.94658	4.01244	3.35297
0.86	3.64647	3.58991	3.80021	2.76603	1.08201	1.20069	2.70802	3.11638	2.58573	2.85804	3.19101	3.51318	3.4737	3.80945	3.52593	3.35939	3.28958	2.65647	3.80394	3.24251	3.83667	3.93601	4.0058	3.3117	3.34474	3.94116	4.00711	3.34676
0.861	3.6422	3.58554	3.79613	2.76062	1.07438	1.19319	2.70252	3.1114	2.58005	2.85272	3.1875	3.51002	3.47048	3.80685	3.52264	3.35601	3.28624	2.65079	3.79834	3.23617	3.83112	3.93059	4.00047	3.30545	3.33854	3.93575	4.00178	3.34056
0.862	3.63793	3.58118	3.79205	2.7552	1.06675	1.18568	2.69702	3.10642	2.57438	2.84739	3.18399	3.50687	3.46726	3.80425	3.51936	3.35263	3.2829	2.6451	3.79275	3.22983	3.82557	3.92517	3.99514	3.29921	3.33233	3.93033	3.99645	3.33435
0.863	3.63366	3.57681	3.78797	2.74979	1.05912	1.17818	2.69152	3.10145	2.5687	2.84206	3.18048	3.50371	3.46403	3.80164	3.51607	3.34925	3.27956	2.63942	3.78716	3.2235	3.82002	3.91976	3.98981	3.29296	3.32612	3.92491	3.99112	3.32815
0.864	3.62938	3.57245	3.78389	2.74438	1.05149	1.17067	2.68602	3.09647	2.56303	2.83674	3.17698	3.50056	3.46081	3.79904	3.51279	3.34587	3.27622	2.63374	3.78157	3.21716	3.81447	3.91434	3.98448	3.28671	3.31992	3.91949	3.98579	3.32194
0.865	3.62511	3.56809	3.77981	2.73896	1.04386	1.16317	2.68052	3.09149	2.55735	2.83141	3.17347	3.4974	3.45759	3.79643	3.5095	3.3425	3.27288	2.62806	3.77597	3.21082	3.80892	3.90892	3.97915	3.28046	3.31371	3.91408	3.98046	3.31574
0.866	3.62084	3.56372	3.77573	2.73355	1.03623	1.15567	2.67502	3.08652	2.55168	2.82609	3.16996	3.49424	3.45436	3.79381	3.50621	3.33912	3.26954	2.62238	3.77038	3.20449	3.80337	3.9035	3.97382	3.27421	3.30751	3.90866	3.97513	3.30953
0.867	3.61657	3.55936	3.77165	2.72814	1.0286	1.14816	2.66952	3.08154	2.54601	2.82076	3.16645	3.49108	3.45114	3.7912	3.50292	3.33574	3.2662	2.6167	3.76479	3.19815	3.79782	3.89809	3.96849	3.26796	3.3013	3.90324	3.9698	3.30332
0.868	3.6123	3.55499	3.76757	2.72272	1.02098	1.14066	2.66402	3.07656	2.54033	2.81543	3.16294	3.48792	3.44791	3.78858	3.49963	3.33236	3.26286	2.61102	3.75919	3.19181	3.79228	3.89267	3.96316	3.26171	3.2951	3.89782	3.96447	3.29712
0.869	3.60802	3.55063	3.76349	2.71731	1.01335	1.13315	2.65852	3.07159	2.53466	2.81011	3.15943	3.48476	3.44469	3.78597	3.49634	3.32898	3.25951	2.60534	3.7536	3.18548	3.78673	3.88725	3.95783	3.25546	3.28889	3.89241	3.95914	3.29091
0.87	3.60375	3.54626	3.75941	2.7119	1.00572	1.12565	2.65302	3.06661	2.52898	2.80478	3.15592	3.4816	3.44146	3.78335	3.49305	3.3256	3.25617	2.59966	3.74801	3.17914	3.78118	3.88183	3.9525	3.24921	3.28269	3.88699	3.95381	3.28471
0.871	3.59948	3.5419	3.75533	2.70648	0.998086	1.11815	2.64752	3.06163	2.52331	2.79945	3.15241	3.47843	3.43824	3.78072	3.48976	3.32223	3.25283	2.59398	3.74242	3.1728	3.77563	3.87642	3.94717	3.24296	3.27648	3.88157	3.94848	3.2785
0.872	3.59521	3.53754	3.75125	2.70107	0.990456	1.11064	2.64202	3.05665	2.51763	2.79413	3.1489	3.47527	3.43501	3.7781	3.48646	3.31885	3.24948	2.5883	3.73682	3.16647	3.77008	3.871	3.94184	3.23671	3.27027	3.87615	3.94315	3.2723
0.873	3.59093	3.53317	3.74717	2.69566	0.982826	1.10314	2.63652	3.05168	2.51196	2.7888	3.14539	3.47211	3.43178	3.77547	3.48317	3.31547	3.24614	2.58262	3.73123	3.16013	3.76453	3.86558	3.93651	3.23047	3.26407	3.87074	3.93782	3.26609
0.874	3.58666	3.52881	3.74309	2.69024	0.975196	1.09563	2.63102	3.0467	2.50629	2.78348	3.14188	3.46894	3.42855	3.77284	3.47988	3.31209	3.2428	2.57694	3.72564	3.1538	3.75898	3.86016	3.93119	3.22422	3.25786	3.86532	3.93249	3.25988
0.875	3.58239	3.52444	3.73901	2.68483	0.967566	1.08813	2.62551	3.04172	2.50061	2.77815	3.13837	3.46578	3.42532	3.77021	3.47658	3.30871	3.23945	2.57126	3.72004	3.14746	3.75343	3.85475	3.92586	3.21797	3.25166	3.8599	3.92716	3.25368
0.876	3.57812	3.52008	3.73493	2.67942	0.959936	1.08062	2.62001	3.03675	2.49494	2.77282	3.13486	3.46261	3.42209	3.76758	3.47329	3.30533	3.23611	2.56558	3.71445	3.14112	3.74788	3.84933	3.92053	3.21172	3.24545	3.85448	3.92183	3.24747
0.877	3.57385	3.51572	3.73085	2.674	0.952306	1.07312	2.61451	3.03177	2.48926	2.7675	3.13135	3.45944	3.41886	3.76494	3.46999	3.30195	3.23276	2.5599	3.70886	3.13479	3.74233	3.84391	3.9152	3.20547	3.23925	3.84907	3.9165	3.24127
0.878	3.56957	3.51135	3.72678	2.66859	0.944677	1.06562	2.60901	3.02679	2.48359	2.76217	3.12784	3.45628	3.41563	3.7623	3.4667	3.29857	3.22942	2.55422	3.70327	3.12845	3.73679	3.83849	3.90987	3.19922	3.23304	3.84365	3.91117	3.23506
0.879	3.5653	3.50699	3.7227	2.66317	0.937047	1.05811	2.60351	3.02182	2.47791	2.75684	3.12433	3.45311	3.4124	3.75966	3.4634	3.29519	3.22607	2.54854	3.69767	3.12211	3.73124	3.83308	3.90454	3.19297	3.22684	3.83823	3.90584	3.22886
0.88	3.56103	3.50262	3.71862	2.65776	0.929417	1.05061	2.59801	3.01684	2.47224	2.75152	3.12082	3.44994	3.40917	3.75702	3.4601	3.29181	3.22273	2.54286	3.69208	3.11578	3.72569	3.82766	3.89921	3.18672	3.22063	3.83281	3.90051	3.22265
0.881	3.55676	3.49826	3.71454	2.65235	0.921787	1.0431	2.59251	3.01186	2.46657	2.74619	3.1173	3.44677	3.40593	3.75438	3.4568	3.28843	3.21938	2.53718	3.68649	3.10944	3.72014	3.82224	3.89388	3.18047	3.21442	3.8274	3.89518	3.21644
0.882	3.55248	3.49389	3.71046	2.64693	0.914157	1.0356	2.58701	3.00688	2.46089	2.74086	3.11379	3.4436	3.4027	3.75173	3.4535	3.28505	3.21603	2.5315	3.68089	3.1031	3.71459	3.81682	3.88855	3.17422	3.20822	3.82198	3.88985	3.21024
0.883	3.54821	3.48953	3.70638	2.64152	0.906527	1.0281	2.58151	3.00191	2.45522	2.73554	3.11028	3.44043	3.39947	3.74908	3.4502	3.28167	3.21269	2.52582	3.6753	3.09677	3.70904	3.81141	3.88322	3.16797	3.20201	3.81656	3.88452	3.20403
0.884	3.54394	3.48517	3.7023	2.63611	0.898898	1.02059	2.57601	2.99693	2.44954	2.73021	3.10677	3.43726	3.39623	3.74643	3.4469	3.27829	3.20934	2.52014	3.66971	3.09043	3.70349	3.80599	3.87789	3.16173	3.19581	3.81114	3.87919	3.19783
0.885	3.53967	3.4808	3.69822	2.63069	0.891268	1.01309	2.57051	2.99195	2.44387	2.72489	3.10325	3.43409	3.393	3.74378	3.4436	3.27491	3.20599	2.51446	3.66412	3.08409	3.69794	3.80057	3.87256	3.15548	3.1896	3.80573	3.87386	3.19162
0.886	3.5354	3.47644	3.69414	2.62528	0.883638	1.00558	2.56501	2.98698	2.43819	2.71956	3.09974	3.43091	3.38976	3.74113	3.4403	3.27153	3.20264	2.50878	3.65852	3.07776	3.69239	3.79515	3.86723	3.14923	3.1834	3.80031	3.86853	3.18542
0.887	3.53112	3.47207	3.69006	2.61987	0.876008	0.998079	2.55951	2.982	2.43252	2.71423	3.09623	3.42774	3.38652	3.73847	3.437	3.26815	3.19929	2.5031	3.65293	3.07142	3.68684	3.78974	3.8619	3.14298	3.17719	3.79489	3.86321	3.17921
0.888	3.52685	3.46771	3.68598	2.61445	0.868378	0.990575	2.55401	2.97702	2.42684	2.70891	3.09271	3.42456	3.38329	3.73581	3.43369	3.26477	3.19595	2.49742	3.64734	3.06508	3.6813	3.78432	3.85657	3.13673	3.17098	3.78947	3.85788	3.173
0.889	3.52258	3.46334	3.6819	2.60904	0.860748	0.98307	2.54851	2.97204	2.42117	2.70358	3.0892	3.42139	3.38005	3.73315	3.43039	3.26139	3.1926	2.49174	3.64174	3.05875	3.67575	3.7789	3.85124	3.13048	3.16478	3.78406	3.85255	3.1668
0.89	3.51831	3.45898	3.67782	2.60363	0.853119	0.975566	2.54301	2.96707	2.4155	2.69825	3.08569	3.41821	3.37681	3.73049	3.42709	3.258	3.18925	2.48606	3.63615	3.05241	3.6702	3.77348	3.84591	3.12423	3.15857	3.77864	3.84722	3.16059
0.891	3.51403	3.45462	3.67374	2.59821	0.845489	0.968062	2.53751	2.96209	2.40982	2.69293	3.08217	3.41504	3.37357	3.72783	3.42378	3.25462	3.1859	2.48038	3.63056	3.04607	3.66465	3.76807	3.84058	3.11798	3.15237	3.77322	3.84189	3.15439
0.892	3.50976	3.45025	3.66966	2.5928	0.837859	0.960558	2.53201	2.95711	2.40415	2.6876	3.07866	3.41186	3.37034	3.72516	3.42048	3.25124	3.18255	2.4747	3.62497	3.03974	3.6591	3.76265	3.83525	3.11173	3.14616	3.7678	3.83656	3.14818
0.893	3.50549	3.44589	3.66558	2.58739	0.830229	0.953054	2.52651	2.95214	2.39847	2.68228	3.07514	3.40868	3.3671	3.72249	3.41717	3.24786	3.1792	2.46902	3.61937	3.0334	3.65355	3.75723	3.82992	3.10548	3.13996	3.76239	3.83123	3.14198
0.894	3.50122	3.44152	3.6615	2.58197	0.822599	0.94555	2.52101	2.94716	2.3928	2.67695	3.07163	3.40551	3.36386	3.71982	3.41386	3.24448	3.17585	2.46334	3.61378	3.02706	3.648	3.75181	3.82459	3.09923	3.13375	3.75697	3.8259	3.13577
0.895	3.49695	3.43716	3.65742	2.57656	0.814969	0.938045	2.51551	2.94218	2.38712	2.67162	3.06811	3.40233	3.36062	3.71715	3.41056	3.2411	3.1725	2.45766	3.60819	3.02073	3.64245	3.7464	3.81926	3.09299	3.12755	3.75155	3.82057	3.12956
0.896	3.49267	3.4328	3.65334	2.57115	0.807339	0.930541	2.51001	2.93721	2.38145	2.6663	3.0646	3.39915	3.35738	3.71448	3.40725	3.23772	3.16915	2.45198	3.60259	3.01439	3.6369	3.74098	3.81393	3.08674	3.12134	3.74613	3.81524	3.12336
0.897	3.4884	3.42843	3.64927	2.56573	0.79971	0.923037	2.50451	2.93223	2.37578	2.66097	3.06108	3.39597	3.35413	3.7118	3.40394	3.23433	3.16579	2.44629	3.597	3.00806	3.63135	3.73556	3.8086	3.08049	3.11513	3.74072	3.80991	3.11715
0.898	3.48413	3.42407	3.64519	2.56032	0.79208	0.915533	2.499	2.92725	2.3701	2.65564	3.05757	3.39279	3.35089	3.70912	3.40063	3.23095	3.16244	2.44061	3.59141	3.00172	3.6258	3.73014	3.80327	3.07424	3.10893	3.7353	3.80458	3.11095
0.899	3.47986	3.4197	3.64111	2.55491	0.78445	0.908029	2.4935	2.92227	2.36443	2.65032	3.05405	3.38961	3.34765	3.70645	3.39732	3.22757	3.15909	2.43493	3.58582	2.99538	3.62026	3.72473	3.79794	3.06799	3.10272	3.72988	3.79925	3.10474
0.9	3.47559	3.41534	3.63703	2.54949	0.77682	0.900525	2.488	2.9173	2.35875	2.64499	3.05053	3.38642	3.34441	3.70377	3.39401	3.22419	3.15574	2.42925	3.58022	2.98905	3.61471	3.71931	3.79261	3.06174	3.09652	3.72446	3.79392	3.09854
0.901	3.47131	3.41097	3.63295	2.54408	0.76919	0.89302	2.4825	2.91232	2.35308	2.63967	3.04702	3.38324	3.34116	3.70108	3.3907	3.2208	3.15239	2.42357	3.57463	2.98271	3.60916	3.71389	3.78728	3.05549	3.09031	3.71905	3.78859	3.09233
0.902	3.46704	3.40661	3.62887	2.53867	0.76156	0.885516	2.477	2.90734	2.3474	2.63434	3.0435	3.38006	3.33792	3.6984	3.38739	3.21742	3.14903	2.41789	3.56904	2.97637	3.60361	3.70847	3.78195	3.04924	3.08411	3.71363	3.78326	3.08612
0.903	3.46277	3.40225	3.62479	2.53325	0.753931	0.878012	2.4715	2.90237	2.34173	2.62901	3.03998	3.37688	3.33468	3.69571	3.38408	3.21404	3.14568	2.41221	3.56344	2.97004	3.59806	3.70306	3.77662	3.04299	3.0779	3.70821	3.77793	3.07992
0.904	3.4585	3.39788	3.62071	2.52784	0.746301	0.870508	2.466	2.89739	2.33606	2.62369	3.03647	3.37369	3.33143	3.69302	3.38077	3.21066	3.14233	2.40653	3.55785	2.9637	3.59251	3.69764	3.77129	3.03674	3.0717	3.70279	3.7726	3.07371
0.905	3.45422	3.39352	3.61663	2.52242	0.738671	0.863004	2.4605	2.89241	2.33038	2.61836	3.03295	3.37051	3.32819	3.69033	3.37745	3.20727	3.13897	2.40085	3.55226	2.95736	3.58696	3.69222	3.76596	3.03049	3.06549	3.69738	3.76727	3.06751
0.906	3.44995	3.38915	3.61255	2.51701	0.731041	0.855499	2.455	2.88743	2.32471	2.61303	3.02943	3.36732	3.32494	3.68764	3.37414	3.20389	3.13562	2.39517	3.54667	2.95103	3.58141	3.6868	3.76063	3.02425	3.05928	3.69196	3.76194	3.0613
0.907	3.44568	3.38479	3.60847	2.5116	0.723411	0.847995	2.4495	2.88246	2.31903	2.60771	3.02591	3.36414	3.32169	3.68495	3.37083	3.20051	3.13227	2.38949	3.54107	2.94469	3.57586	3.68139	3.7553	3.018	3.05308	3.68654	3.75661	3.0551
0.908	3.44141	3.38043	3.60439	2.50618	0.715781	0.840491	2.444	2.87748	2.31336	2.60238	3.0224	3.36095	3.31845	3.68225	3.36751	3.19713	3.12891	2.38381	3.53548	2.93835	3.57031	3.67597	3.74997	3.01175	3.04687	3.68112	3.75128	3.04889
0.909	3.43714	3.37606	3.60031	2.50077	0.708152	0.832987	2.4385	2.8725	2.30768	2.59705	3.01888	3.35776	3.3152	3.67956	3.3642	3.19374	3.12556	2.37813	3.52989	2.93202	3.56477	3.67055	3.74464	3.0055	3.04067	3.67571	3.74595	3.04268
0.91	3.43286	3.3717	3.59623	2.49536	0.700522	0.825483	2.433	2.86753	2.30201	2.59173	3.01536	3.35457	3.31195	3.67686	3.36088	3.19036	3.1222	2.37245	3.52429	2.92568	3.55922	3.66513	3.73931	2.99925	3.03446	3.67029	3.74062	3.03648
0.911	3.42859	3.36733	3.59215	2.48994	0.692892	0.817979	2.4275	2.86255	2.29633	2.5864	3.01184	3.35139	3.3087	3.67416	3.35757	3.18698	3.11885	2.36677	3.5187	2.91934	3.55367	3.65972	3.73398	2.993	3.02826	3.66487	3.73529	3.03027
0.912	3.42432	3.36297	3.58807	2.48453	0.685262	0.810474	2.422	2.85757	2.29066	2.58108	3.00832	3.3482	3.30546	3.67146	3.35425	3.18359	3.11549	2.36109	3.51311	2.91301	3.54812	3.6543	3.72865	2.98675	3.02205	3.65945	3.72996	3.02407
0.913	3.42005	3.3586	3.58399	2.47912	0.677632	0.80297	2.4165	2.8526	2.28499	2.57575	3.0048	3.34501	3.30221	3.66875	3.35093	3.18021	3.11214	2.35541	3.50752	2.90667	3.54257	3.64888	3.72332	2.9805	3.01585	3.65404	3.72463	3.01786
0.914	3.41577	3.35424	3.57991	2.4737	0.670002	0.795466	2.411	2.84762	2.27931	2.57042	3.00129	3.34182	3.29896	3.66605	3.34762	3.17683	3.10878	2.34973	3.50192	2.90033	3.53702	3.64346	3.71799	2.97425	3.00964	3.64862	3.7193	3.01165
0.915	3.4115	3.34988	3.57583	2.46829	0.662373	0.787962	2.4055	2.84264	2.27364	2.5651	2.99777	3.33863	3.29571	3.66334	3.3443	3.17344	3.10543	2.34405	3.49633	2.894	3.53147	3.63805	3.71266	2.968	3.00343	3.6432	3.71397	3.00545
0.916	3.40723	3.34551	3.57175	2.46288	0.654743	0.780458	2.4	2.83766	2.26796	2.55977	2.99425	3.33544	3.29246	3.66063	3.34098	3.17006	3.10207	2.33837	3.49074	2.88766	3.52592	3.63263	3.70733	2.96175	2.99723	3.63778	3.70864	2.99924
0.917	3.40296	3.34115	3.56768	2.45746	0.647113	0.772953	2.3945	2.83269	2.26229	2.55444	2.99073	3.33225	3.28921	3.65792	3.33766	3.16668	3.09871	2.33269	3.48514	2.88132	3.52037	3.62721	3.702	2.9555	2.99102	3.63237	3.70331	2.99304
0.918	3.39869	3.33678	3.5636	2.45205	0.639483	0.765449	2.389	2.82771	2.25661	2.54912	2.98721	3.32905	3.28596	3.65521	3.33434	3.16329	3.09536	2.32701	3.47955	2.87499	3.51482	3.62179	3.69667	2.94926	2.98482	3.62695	3.69798	2.98683
0.919	3.39441	3.33242	3.55952	2.44664	0.631853	0.757945	2.3835	2.82273	2.25094	2.54379	2.98369	3.32586	3.28271	3.6525	3.33102	3.15991	3.092	2.32133	3.47396	2.86865	3.50928	3.61638	3.69135	2.94301	2.97861	3.62153	3.69265	2.98063
0.92	3.39014	3.32805	3.55544	2.44122	0.624223	0.750441	2.37799	2.81776	2.24527	2.53847	2.98017	3.32267	3.27945	3.64979	3.3277	3.15652	3.08864	2.31565	3.46836	2.86232	3.50373	3.61096	3.68602	2.93676	2.97241	3.61611	3.68733	2.97442
0.921	3.38587	3.32369	3.55136	2.43581	0.616593	0.742937	2.37249	2.81278	2.23959	2.53314	2.97665	3.31948	3.2762	3.64707	3.32438	3.15314	3.08528	2.30997	3.46277	2.85598	3.49818	3.60554	3.68069	2.93051	2.9662	3.6107	3.682	2.96821
0.922	3.3816	3.31933	3.54728	2.4304	0.608964	0.735433	2.36699	2.8078	2.23392	2.52781	2.97313	3.31628	3.27295	3.64435	3.32106	3.14976	3.08193	2.30429	3.45718	2.84964	3.49263	3.60012	3.67536	2.92426	2.96	3.60528	3.67667	2.96201
0.923	3.37732	3.31496	3.5432	2.42498	0.601334	0.727928	2.36149	2.80282	2.22824	2.52249	2.96961	3.31309	3.2697	3.64163	3.31774	3.14637	3.07857	2.29861	3.45159	2.84331	3.48708	3.59471	3.67003	2.91801	2.95379	3.59986	3.67134	2.9558
0.924	3.37305	3.3106	3.53912	2.41957	0.593704	0.720424	2.35599	2.79785	2.22257	2.51716	2.96609	3.30989	3.26644	3.63891	3.31442	3.14299	3.07521	2.29293	3.44599	2.83697	3.48153	3.58929	3.6647	2.91176	2.94758	3.59444	3.66601	2.9496
0.925	3.36878	3.30623	3.53504	2.41416	0.586074	0.71292	2.35049	2.79287	2.21689	2.51183	2.96257	3.3067	3.26319	3.63619	3.3111	3.1396	3.07185	2.28725	3.4404	2.83063	3.47598	3.58387	3.65937	2.90551	2.94138	3.58903	3.66068	2.94339
0.926	3.36451	3.30187	3.53096	2.40874	0.578444	0.705416	2.34499	2.78789	2.21122	2.50651	2.95905	3.3035	3.25993	3.63346	3.30777	3.13622	3.06849	2.28157	3.43481	2.8243	3.47043	3.57845	3.65404	2.89926	2.93517	3.58361	3.65535	2.93719
0.927	3.36024	3.29751	3.52688	2.40333	0.570814	0.697912	2.33949	2.78292	2.20555	2.50118	2.95553	3.30031	3.25668	3.63074	3.30445	3.13283	3.06513	2.27589	3.42921	2.81796	3.46488	3.57304	3.64871	2.89301	2.92897	3.57819	3.65002	2.93098
0.928	3.35596	3.29314	3.5228	2.39792	0.563185	0.690407	2.33399	2.77794	2.19987	2.49586	2.952	3.29711	3.25342	3.62801	3.30113	3.12945	3.06177	2.27021	3.42362	2.81162	3.45933	3.56762	3.64338	2.88676	2.92276	3.57277	3.64469	2.92477
0.929	3.35169	3.28878	3.51872	2.3925	0.555555	0.682903	2.32849	2.77296	2.1942	2.49053	2.94848	3.29391	3.25017	3.62528	3.2978	3.12606	3.05842	2.26453	3.41803	2.80529	3.45378	3.5622	3.63805	2.88052	2.91656	3.56736	3.63936	2.91857
0.93	3.34742	3.28441	3.51464	2.38709	0.547925	0.675399	2.32299	2.76799	2.18852	2.4852	2.94496	3.29071	3.24691	3.62255	3.29448	3.12268	3.05506	2.25885	3.41244	2.79895	3.44824	3.55678	3.63272	2.87427	2.91035	3.56194	3.63403	2.91236
0.931	3.34315	3.28005	3.51056	2.38167	0.540295	0.667895	2.31749	2.76301	2.18285	2.47988	2.94144	3.28752	3.24366	3.61982	3.29115	3.11929	3.0517	2.25317	3.40684	2.79261	3.44269	3.55137	3.62739	2.86802	2.90414	3.55652	3.6287	2.90616
0.932	3.33887	3.27568	3.50648	2.37626	0.532665	0.660391	2.31199	2.75803	2.17717	2.47455	2.93792	3.28432	3.2404	3.61709	3.28783	3.11591	3.04834	2.24749	3.40125	2.78628	3.43714	3.54595	3.62206	2.86177	2.89794	3.5511	3.62337	2.89995
0.933	3.3346	3.27132	3.5024	2.37085	0.525035	0.652887	2.30649	2.75305	2.1715	2.46922	2.9344	3.28112	3.23714	3.61435	3.2845	3.11252	3.04498	2.2418	3.39566	2.77994	3.43159	3.54053	3.61673	2.85552	2.89173	3.54569	3.61804	2.89375
0.934	3.33033	3.26696	3.49832	2.36543	0.517406	0.645382	2.30099	2.74808	2.16583	2.4639	2.93087	3.27792	3.23389	3.61162	3.28117	3.10914	3.04162	2.23612	3.39006	2.7736	3.42604	3.53511	3.6114	2.84927	2.88553	3.54027	3.61271	2.88754
0.935	3.32606	3.26259	3.49424	2.36002	0.509776	0.637878	2.29549	2.7431	2.16015	2.45857	2.92735	3.27472	3.23063	3.60888	3.27785	3.10575	3.03825	2.23044	3.38447	2.76727	3.42049	3.5297	3.60607	2.84302	2.87932	3.53485	3.60738	2.88133
0.936	3.32179	3.25823	3.49017	2.35461	0.502146	0.630374	2.28999	2.73812	2.15448	2.45324	2.92383	3.27152	3.22737	3.60614	3.27452	3.10237	3.03489	2.22476	3.37888	2.76093	3.41494	3.52428	3.60074	2.83677	2.87312	3.52943	3.60205	2.87513
0.937	3.31751	3.25386	3.48609	2.34919	0.494516	0.62287	2.28449	2.73315	2.1488	2.44792	2.92031	3.26832	3.22411	3.6034	3.27119	3.09898	3.03153	2.21908	3.37329	2.75459	3.40939	3.51886	3.59541	2.83052	2.86691	3.52402	3.59672	2.86892
0.938	3.31324	3.2495	3.48201	2.34378	0.486886	0.615366	2.27899	2.72817	2.14313	2.44259	2.91678	3.26511	3.22085	3.60066	3.26786	3.0956	3.02817	2.2134	3.36769	2.74826	3.40384	3.51344	3.59008	2.82427	2.86071	3.5186	3.59139	2.86272
0.939	3.30897	3.24513	3.47793	2.33837	0.479256	0.607862	2.27349	2.72319	2.13745	2.43727	2.91326	3.26191	3.21759	3.59792	3.26453	3.09221	3.02481	2.20772	3.3621	2.74192	3.39829	3.50803	3.58475	2.81802	2.8545	3.51318	3.58606	2.85651
0.94	3.3047	3.24077	3.47385	2.33295	0.471626	0.600357	2.26799	2.71821	2.13178	2.43194	2.90974	3.25871	3.21433	3.59517	3.26121	3.08883	3.02145	2.20204	3.35651	2.73558	3.39275	3.50261	3.57942	2.81178	2.84829	3.50776	3.58073	2.85031
0.941	3.30043	3.23641	3.46977	2.32754	0.463997	0.592853	2.26249	2.71324	2.1261	2.42661	2.90621	3.25551	3.21107	3.59243	3.25788	3.08544	3.01809	2.19636	3.35091	2.72925	3.3872	3.49719	3.57409	2.80553	2.84209	3.50235	3.5754	2.8441
0.942	3.29615	3.23204	3.46569	2.32213	0.456367	0.585349	2.25698	2.70826	2.12043	2.42129	2.90269	3.2523	3.20781	3.58968	3.25455	3.08205	3.01472	2.19068	3.34532	2.72291	3.38165	3.49177	3.56876	2.79928	2.83588	3.49693	3.57007	2.83789
0.943	3.29188	3.22768	3.46161	2.31671	0.448737	0.577845	2.25148	2.70328	2.11476	2.41596	2.89917	3.2491	3.20455	3.58693	3.25122	3.07867	3.01136	2.185	3.33973	2.71658	3.3761	3.48636	3.56343	2.79303	2.82968	3.49151	3.56474	2.83169
0.944	3.28761	3.22331	3.45753	2.3113	0.441107	0.570341	2.24598	2.69831	2.10908	2.41063	2.89564	3.2459	3.20129	3.58418	3.24789	3.07528	3.008	2.17932	3.33414	2.71024	3.37055	3.48094	3.5581	2.78678	2.82347	3.48609	3.55941	2.82548
0.945	3.28334	3.21895	3.45345	2.30589	0.433477	0.562836	2.24048	2.69333	2.10341	2.40531	2.89212	3.24269	3.19803	3.58143	3.24455	3.0719	3.00464	2.17364	3.32854	2.7039	3.365	3.47552	3.55277	2.78053	2.81727	3.48068	3.55408	2.81928
0.946	3.27906	3.21459	3.44937	2.30047	0.425847	0.555332	2.23498	2.68835	2.09773	2.39998	2.8886	3.23949	3.19477	3.57868	3.24122	3.06851	3.00127	2.16796	3.32295	2.69757	3.35945	3.4701	3.54744	2.77428	2.81106	3.47526	3.54875	2.81307
0.947	3.27479	3.21022	3.44529	2.29506	0.418218	0.547828	2.22948	2.68338	2.09206	2.39466	2.88507	3.23628	3.19151	3.57592	3.23789	3.06512	2.99791	2.16228	3.31736	2.69123	3.3539	3.46469	3.54211	2.76803	2.80486	3.46984	3.54342	2.80687
0.948	3.27052	3.20586	3.44121	2.28965	0.410588	0.540324	2.22398	2.6784	2.08638	2.38933	2.88155	3.23308	3.18825	3.57317	3.23456	3.06174	2.99455	2.1566	3.31176	2.68489	3.34835	3.45927	3.53678	2.76178	2.79865	3.46442	3.53809	2.80066
0.949	3.26625	3.20149	3.43713	2.28423	0.402958	0.53282	2.21848	2.67342	2.08071	2.384	2.87802	3.22987	3.18498	3.57041	3.23123	3.05835	2.99118	2.15092	3.30617	2.67856	3.3428	3.45385	3.53145	2.75553	2.79244	3.45901	3.53276	2.79445
0.95	3.26198	3.19713	3.43305	2.27882	0.395328	0.525316	2.21298	2.66844	2.07504	2.37868	2.8745	3.22666	3.18172	3.56765	3.22789	3.05496	2.98782	2.14524	3.30058	2.67222	3.33726	3.44843	3.52612	2.74928	2.78624	3.45359	3.52743	2.78825
0.951	3.2577	3.19276	3.42897	2.27341	0.387698	0.517811	2.20748	2.66347	2.06936	2.37335	2.87098	3.22346	3.17846	3.56489	3.22456	3.05158	2.98446	2.13956	3.29499	2.66588	3.33171	3.44302	3.52079	2.74304	2.78003	3.44817	3.5221	2.78204
0.952	3.25343	3.1884	3.42489	2.26799	0.380068	0.510307	2.20198	2.65849	2.06369	2.36802	2.86745	3.22025	3.17519	3.56213	3.22123	3.04819	2.98109	2.13388	3.28939	2.65955	3.32616	3.4376	3.51546	2.73679	2.77383	3.44275	3.51677	2.77584
0.953	3.24916	3.18404	3.42081	2.26258	0.372439	0.502803	2.19648	2.65351	2.05801	2.3627	2.86393	3.21704	3.17193	3.55937	3.21789	3.04481	2.97773	2.1282	3.2838	2.65321	3.32061	3.43218	3.51013	2.73054	2.76762	3.43734	3.51144	2.76963
0.954	3.24489	3.17967	3.41673	2.25717	0.364809	0.495299	2.19098	2.64854	2.05234	2.35737	2.8604	3.21383	3.16867	3.55661	3.21456	3.04142	2.97436	2.12252	3.27821	2.64687	3.31506	3.42676	3.5048	2.72429	2.76142	3.43192	3.50612	2.76343
0.955	3.24061	3.17531	3.41266	2.25175	0.357179	0.487795	2.18548	2.64356	2.04666	2.35205	2.85688	3.21062	3.1654	3.55384	3.21122	3.03803	2.971	2.11684	3.27261	2.64054	3.30951	3.42135	3.49947	2.71804	2.75521	3.4265	3.50079	2.75722
0.956	3.23634	3.17094	3.40858	2.24634	0.349549	0.48029	2.17998	2.63858	2.04099	2.34672	2.85335	3.20741	3.16214	3.55108	3.20789	3.03465	2.96763	2.11116	3.26702	2.6342	3.30396	3.41593	3.49414	2.71179	2.74901	3.42108	3.49546	2.75101
0.957	3.23207	3.16658	3.4045	2.24092	0.341919	0.472786	2.17448	2.6336	2.03532	2.34139	2.84983	3.2042	3.15887	3.54831	3.20455	3.03126	2.96427	2.10548	3.26143	2.62786	3.29841	3.41051	3.48881	2.70554	2.7428	3.41567	3.49013	2.74481
0.958	3.2278	3.16221	3.40042	2.23551	0.334289	0.465282	2.16898	2.62863	2.02964	2.33607	2.8463	3.20099	3.1556	3.54554	3.20122	3.02787	2.9609	2.0998	3.25584	2.62153	3.29286	3.40509	3.48348	2.69929	2.73659	3.41025	3.4848	2.7386
0.959	3.22353	3.15785	3.39634	2.2301	0.326659	0.457778	2.16348	2.62365	2.02397	2.33074	2.84277	3.19778	3.15234	3.54278	3.19788	3.02448	2.95754	2.09412	3.25024	2.61519	3.28731	3.39968	3.47815	2.69304	2.73039	3.40483	3.47947	2.7324
0.96	3.21925	3.15349	3.39226	2.22468	0.31903	0.450274	2.15798	2.61867	2.01829	2.32541	2.83925	3.19457	3.14907	3.54	3.19455	3.0211	2.95417	2.08844	3.24465	2.60885	3.28176	3.39426	3.47282	2.68679	2.72418	3.39941	3.47414	2.72619
0.961	3.21498	3.14912	3.38818	2.21927	0.3114	0.44277	2.15248	2.6137	2.01262	2.32009	2.83572	3.19136	3.14581	3.53723	3.19121	3.01771	2.95081	2.08276	3.23906	2.60252	3.27622	3.38884	3.46749	2.68054	2.71798	3.394	3.46881	2.71999
0.962	3.21071	3.14476	3.3841	2.21386	0.30377	0.435265	2.14698	2.60872	2.00694	2.31476	2.8322	3.18815	3.14254	3.53446	3.18787	3.01432	2.94744	2.07708	3.23346	2.59618	3.27067	3.38342	3.46216	2.6743	2.71177	3.38858	3.46348	2.71378
0.963	3.20644	3.14039	3.38002	2.20844	0.29614	0.427761	2.14148	2.60374	2.00127	2.30943	2.82867	3.18494	3.13927	3.53169	3.18453	3.01094	2.94408	2.0714	3.22787	2.58984	3.26512	3.37801	3.45683	2.66805	2.70557	3.38316	3.45815	2.70757
0.964	3.20216	3.13603	3.37594	2.20303	0.28851	0.420257	2.13598	2.59877	1.99559	2.30411	2.82515	3.18173	3.13601	3.52891	3.1812	3.00755	2.94071	2.06572	3.22228	2.58351	3.25957	3.37259	3.45151	2.6618	2.69936	3.37774	3.45282	2.70137
0.965	3.19789	3.13167	3.37186	2.19762	0.28088	0.412753	2.13047	2.59379	1.98992	2.29878	2.82162	3.17852	3.13274	3.52613	3.17786	3.00416	2.93734	2.06004	3.21669	2.57717	3.25402	3.36717	3.44618	2.65555	2.69316	3.37233	3.44749	2.69516
0.966	3.19362	3.1273	3.36778	2.1922	0.273251	0.405249	2.12497	2.58881	1.98425	2.29346	2.81809	3.1753	3.12947	3.52336	3.17452	3.00077	2.93398	2.05436	3.21109	2.57084	3.24847	3.36175	3.44085	2.6493	2.68695	3.36691	3.44216	2.68896
0.967	3.18935	3.12294	3.3637	2.18679	0.265621	0.397745	2.11947	2.58383	1.97857	2.28813	2.81457	3.17209	3.1262	3.52058	3.17118	2.99739	2.93061	2.04868	3.2055	2.5645	3.24292	3.35634	3.43552	2.64305	2.68074	3.36149	3.43683	2.68275
0.968	3.18508	3.11857	3.35962	2.18138	0.257991	0.39024	2.11397	2.57886	1.9729	2.2828	2.81104	3.16888	3.12293	3.5178	3.16784	2.994	2.92724	2.043	3.19991	2.55816	3.23737	3.35092	3.43019	2.6368	2.67454	3.35607	3.4315	2.67654
0.969	3.1808	3.11421	3.35554	2.17596	0.250361	0.382736	2.10847	2.57388	1.96722	2.27748	2.80751	3.16566	3.11966	3.51502	3.1645	2.99061	2.92388	2.03731	3.19431	2.55183	3.23182	3.3455	3.42486	2.63055	2.66833	3.35066	3.42617	2.67034
0.97	3.17653	3.10984	3.35146	2.17055	0.242731	0.375232	2.10297	2.5689	1.96155	2.27215	2.80399	3.16245	3.11639	3.51224	3.16116	2.98722	2.92051	2.03163	3.18872	2.54549	3.22627	3.34008	3.41953	2.6243	2.66213	3.34524	3.42084	2.66413
0.971	3.17226	3.10548	3.34738	2.16514	0.235101	0.367728	2.09747	2.56393	1.95587	2.26682	2.80046	3.15923	3.11313	3.50945	3.15782	2.98384	2.91714	2.02595	3.18313	2.53915	3.22073	3.33467	3.4142	2.61805	2.65592	3.33982	3.41551	2.65793
0.972	3.16799	3.10112	3.3433	2.15972	0.227472	0.360224	2.09197	2.55895	1.9502	2.2615	2.79693	3.15602	3.10986	3.50667	3.15448	2.98045	2.91377	2.02027	3.17754	2.53282	3.21518	3.32925	3.40887	2.6118	2.64972	3.3344	3.41018	2.65172
0.973	3.16372	3.09675	3.33922	2.15431	0.219842	0.352719	2.08647	2.55397	1.94453	2.25617	2.7934	3.1528	3.10659	3.50388	3.15114	2.97706	2.91041	2.01459	3.17194	2.52648	3.20963	3.32383	3.40354	2.60555	2.64351	3.32899	3.40485	2.64552
0.974	3.15944	3.09239	3.33515	2.1489	0.212212	0.345215	2.08097	2.54899	1.93885	2.25085	2.78988	3.14959	3.10332	3.5011	3.1478	2.97367	2.90704	2.00891	3.16635	2.52014	3.20408	3.31841	3.39821	2.59931	2.6373	3.32357	3.39952	2.63931
0.975	3.15517	3.08802	3.33107	2.14348	0.204582	0.337711	2.07547	2.54402	1.93318	2.24552	2.78635	3.14637	3.10005	3.49831	3.14446	2.97029	2.90367	2.00323	3.16076	2.51381	3.19853	3.313	3.39288	2.59306	2.6311	3.31815	3.39419	2.6331
0.976	3.1509	3.08366	3.32699	2.13807	0.196952	0.330207	2.06997	2.53904	1.9275	2.24019	2.78282	3.14316	3.09677	3.49552	3.14112	2.9669	2.9003	1.99755	3.15516	2.50747	3.19298	3.30758	3.38755	2.58681	2.62489	3.31273	3.38886	2.6269
0.977	3.14663	3.0793	3.32291	2.13266	0.189322	0.322703	2.06447	2.53406	1.92183	2.23487	2.7793	3.13994	3.0935	3.49273	3.13777	2.96351	2.89693	1.99187	3.14957	2.50113	3.18743	3.30216	3.38222	2.58056	2.61869	3.30732	3.38353	2.62069
0.978	3.14235	3.07493	3.31883	2.12724	0.181692	0.315199	2.05897	2.52909	1.91615	2.22954	2.77577	3.13672	3.09023	3.48994	3.13443	2.96012	2.89357	1.98619	3.14398	2.4948	3.18188	3.29674	3.37689	2.57431	2.61248	3.3019	3.3782	2.61449
0.979	3.13808	3.07057	3.31475	2.12183	0.174063	0.307694	2.05347	2.52411	1.91048	2.22421	2.77224	3.1335	3.08696	3.48715	3.13109	2.95673	2.8902	1.98051	3.13839	2.48846	3.17633	3.29133	3.37156	2.56806	2.60628	3.29648	3.37287	2.60828
0.98	3.13381	3.0662	3.31067	2.11642	0.166433	0.30019	2.04797	2.51913	1.90481	2.21889	2.76871	3.13029	3.08369	3.48435	3.12775	2.95334	2.88683	1.97483	3.13279	2.48212	3.17078	3.28591	3.36623	2.56181	2.60007	3.29106	3.36754	2.60208
0.981	3.12954	3.06184	3.30659	2.111	0.158803	0.292686	2.04247	2.51416	1.89913	2.21356	2.76518	3.12707	3.08042	3.48156	3.1244	2.94996	2.88346	1.96915	3.1272	2.47579	3.16524	3.28049	3.3609	2.55556	2.59387	3.28565	3.36221	2.59587
0.982	3.12527	3.05747	3.30251	2.10559	0.151173	0.285182	2.03697	2.50918	1.89346	2.20824	2.76166	3.12385	3.07714	3.47876	3.12106	2.94657	2.88009	1.96347	3.12161	2.46945	3.15969	3.27507	3.35557	2.54931	2.58766	3.28023	3.35688	2.58966
0.983	3.12099	3.05311	3.29843	2.10017	0.143543	0.277678	2.03147	2.5042	1.88778	2.20291	2.75813	3.12063	3.07387	3.47597	3.11772	2.94318	2.87672	1.95779	3.11601	2.46311	3.15414	3.26966	3.35024	2.54306	2.58145	3.27481	3.35155	2.58346
0.984	3.11672	3.04875	3.29435	2.09476	0.135913	0.270173	2.02597	2.49922	1.88211	2.19758	2.7546	3.11741	3.0706	3.47317	3.11437	2.93979	2.87335	1.95211	3.11042	2.45678	3.14859	3.26424	3.34491	2.53681	2.57525	3.26939	3.34622	2.57725
0.985	3.11245	3.04438	3.29027	2.08935	0.128284	0.262669	2.02047	2.49425	1.87643	2.19226	2.75107	3.11419	3.06733	3.47037	3.11103	2.9364	2.86998	1.94643	3.10483	2.45044	3.14304	3.25882	3.33958	2.53057	2.56904	3.26398	3.34089	2.57105
0.986	3.10818	3.04002	3.28619	2.08393	0.120654	0.255165	2.01497	2.48927	1.87076	2.18693	2.74754	3.11097	3.06405	3.46757	3.10768	2.93301	2.86661	1.94075	3.09924	2.4441	3.13749	3.2534	3.33425	2.52432	2.56284	3.25856	3.33556	2.56484
0.987	3.1039	3.03565	3.28211	2.07852	0.113024	0.247661	2.00946	2.48429	1.86508	2.1816	2.74401	3.10775	3.06078	3.46477	3.10434	2.92963	2.86324	1.93507	3.09364	2.43777	3.13194	3.24799	3.32892	2.51807	2.55663	3.25314	3.33024	2.55864
0.988	3.09963	3.03129	3.27803	2.07311	0.105394	0.240157	2.00396	2.47932	1.85941	2.17628	2.74048	3.10453	3.0575	3.46197	3.10099	2.92624	2.85987	1.92939	3.08805	2.43143	3.12639	3.24257	3.32359	2.51182	2.55043	3.24772	3.32491	2.55243
0.989	3.09536	3.02692	3.27395	2.06769	0.0977642	0.232653	1.99846	2.47434	1.85374	2.17095	2.73696	3.10131	3.05423	3.45917	3.09765	2.92285	2.8565	1.92371	3.08246	2.4251	3.12084	3.23715	3.31826	2.50557	2.54422	3.24231	3.31958	2.54622
0.99	3.09109	3.02256	3.26987	2.06228	0.0901344	0.225148	1.99296	2.46936	1.84806	2.16562	2.73343	3.09809	3.05096	3.45636	3.0943	2.91946	2.85313	1.91803	3.07686	2.41876	3.11529	3.23173	3.31293	2.49932	2.53802	3.23689	3.31425	2.54002
0.991	3.08682	3.0182	3.26579	2.05687	0.0825045	0.217644	1.98746	2.46438	1.84239	2.1603	2.7299	3.09487	3.04768	3.45356	3.09096	2.91607	2.84976	1.91235	3.07127	2.41242	3.10974	3.22632	3.3076	2.49307	2.53181	3.23147	3.30892	2.53381
0.992	3.08254	3.01383	3.26171	2.05145	0.0748747	0.21014	1.98196	2.45941	1.83671	2.15497	2.72637	3.09165	3.04441	3.45075	3.08761	2.91268	2.84639	1.90667	3.06568	2.40609	3.1042	3.2209	3.30227	2.48682	2.5256	3.22605	3.30359	2.52761
0.993	3.07827	3.00947	3.25764	2.04604	0.0672449	0.202636	1.97646	2.45443	1.83104	2.14965	2.72284	3.08843	3.04113	3.44795	3.08426	2.90929	2.84302	1.90099	3.06009	2.39975	3.09865	3.21548	3.29694	2.48057	2.5194	3.22064	3.29826	2.5214
0.994	3.074	3.0051	3.25356	2.04063	0.059615	0.195132	1.97096	2.44945	1.82536	2.14432	2.71931	3.08521	3.03786	3.44514	3.08092	2.9059	2.83965	1.89531	3.05449	2.39341	3.0931	3.21006	3.29161	2.47432	2.51319	3.21522	3.29293	2.5152
0.995	3.06973	3.00074	3.24948	2.03521	0.0519852	0.187627	1.96546	2.44448	1.81969	2.13899	2.71578	3.08198	3.03458	3.44233	3.07757	2.90252	2.83628	1.88963	3.0489	2.38708	3.08755	3.20465	3.28628	2.46807	2.50699	3.2098	3.2876	2.50899
0.996	3.06545	2.99638	3.2454	2.0298	0.0443553	0.180123	1.95996	2.4395	1.81402	2.13367	2.71225	3.07876	3.0313	3.43952	3.07422	2.89913	2.83291	1.88395	3.04331	2.38074	3.082	3.19923	3.28095	2.46183	2.50078	3.20438	3.28227	2.50278
0.997	3.06118	2.99201	3.24132	2.02439	0.0367255	0.172619	1.95446	2.43452	1.80834	2.12834	2.70872	3.07554	3.02803	3.43671	3.07087	2.89574	2.82954	1.87827	3.03771	2.3744	3.07645	3.19381	3.27562	2.45558	2.49458	3.19897	3.27694	2.49658
0.998	3.05691	2.98765	3.23724	2.01897	0.0290957	0.165115	1.94896	2.42955	1.80267	2.12301	2.70519	3.07232	3.02475	3.4339	3.06753	2.89235	2.82617	1.87259	3.03212	2.36807	3.0709	3.18839	3.27029	2.44933	2.48837	3.19355	3.27161	2.49037
0.999	3.05264	2.98328	3.23316	2.01356	0.0214658	0.157611	1.94346	2.42457	1.79699	2.11769	2.70166	3.06909	3.02148	3.43109	3.06418	2.88896	2.8228	1.86691	3.02653	2.36173	3.06535	3.18298	3.26496	2.44308	2.48217	3.18813	3.26628	2.48417
1	3.04837	2.97892	3.22908	2.00815	0.013836	0.150107	1.93796	2.41959	1.79132	2.11236	2.69813	3.06587	3.0182	3.42828	3.06083	2.88557	2.81942	1.86123	3.02094	2.35539	3.0598	3.17756	3.25963	2.43683	2.47596	3.18271	3.26095	2.47796
1.001	3.04409	2.97455	3.225	2.00273	0.00620613	0.142602	1.93246	2.41461	1.78564	2.10704	2.6946	3.06264	3.01492	3.42546	3.05748	2.88218	2.81605	1.85555	3.01534	2.34906	3.05425	3.17214	3.2543	2.43058	2.46975	3.1773	3.25562	2.47176
1.002	3.03982	2.97019	3.22092	1.99732	-0.0014237	0.135098	1.92696	2.40964	1.77997	2.10171	2.69107	3.05942	3.01164	3.42265	3.05413	2.87879	2.81268	1.84987	3.00975	2.34272	3.04871	3.16672	3.24897	2.42433	2.46355	3.17188	3.25029	2.46555
1.003	3.03555	2.96583	3.21684	1.99191	-0.0090536	0.127594	1.92146	2.40466	1.7743	2.09638	2.68754	3.0562	3.00837	3.41983	3.05078	2.8754	2.80931	1.84419	3.00416	2.33638	3.04316	3.16131	3.24364	2.41808	2.45734	3.16646	3.24496	2.45934
1.004	3.03128	2.96146	3.21276	1.98649	-0.0166834	0.12009	1.91596	2.39968	1.76862	2.09106	2.68401	3.05297	3.00509	3.41702	3.04743	2.87201	2.80594	1.83851	2.99856	2.33005	3.03761	3.15589	3.23831	2.41183	2.45114	3.16104	3.23963	2.45314
1.005	3.02701	2.9571	3.20868	1.98108	-0.0243132	0.112586	1.91046	2.39471	1.76295	2.08573	2.68048	3.04975	3.00181	3.4142	3.04408	2.86862	2.80256	1.83282	2.99297	2.32371	3.03206	3.15047	3.23298	2.40558	2.44493	3.15563	3.2343	2.44693
1.006	3.02273	2.95273	3.2046	1.97567	-0.0319431	0.105081	1.90496	2.38973	1.75727	2.0804	2.67695	3.04652	2.99853	3.41138	3.04073	2.86523	2.79919	1.82714	2.98738	2.31737	3.02651	3.14505	3.22765	2.39933	2.43873	3.15021	3.22897	2.44073
1.007	3.01846	2.94837	3.20052	1.97025	-0.0395729	0.0975773	1.89946	2.38475	1.7516	2.07508	2.67342	3.0433	2.99526	3.40856	3.03738	2.86184	2.79582	1.82146	2.98179	2.31104	3.02096	3.13964	3.22232	2.39309	2.43252	3.14479	3.22364	2.43452
1.008	3.01419	2.944	3.19644	1.96484	-0.0472028	0.0900731	1.89396	2.37977	1.74592	2.06975	2.66989	3.04007	2.99198	3.40574	3.03403	2.85846	2.79245	1.81578	2.97619	2.3047	3.01541	3.13422	3.21699	2.38684	2.42632	3.13937	3.21831	2.42832
1.009	3.00992	2.93964	3.19236	1.95942	-0.0548326	0.082569	1.88846	2.3748	1.74025	2.06443	2.66636	3.03684	2.9887	3.40292	3.03068	2.85507	2.78907	1.8101	2.9706	2.29836	3.00986	3.1288	3.21166	2.38059	2.42011	3.13396	3.21298	2.42211
1.01	3.00564	2.93528	3.18828	1.95401	-0.0624625	0.0750648	1.88295	2.36982	1.73458	2.0591	2.66283	3.03362	2.98542	3.4001	3.02733	2.85168	2.7857	1.80442	2.96501	2.29203	3.00431	3.12338	3.20634	2.37434	2.4139	3.12854	3.20765	2.4159
1.011	3.00137	2.93091	3.1842	1.9486	-0.0700923	0.0675606	1.87745	2.36484	1.7289	2.05377	2.6593	3.03039	2.98214	3.39727	3.02398	2.84829	2.78233	1.79874	2.95941	2.28569	2.99876	3.11797	3.20101	2.36809	2.4077	3.12312	3.20232	2.4097
1.012	2.9971	2.92655	3.18013	1.94318	-0.0777221	0.0600564	1.87195	2.35987	1.72323	2.04845	2.65577	3.02716	2.97886	3.39445	3.02063	2.8449	2.77896	1.79306	2.95382	2.27936	2.99322	3.11255	3.19568	2.36184	2.40149	3.1177	3.19699	2.40349
1.013	2.99283	2.92218	3.17605	1.93777	-0.085352	0.0525522	1.86645	2.35489	1.71755	2.04312	2.65224	3.02394	2.97558	3.39163	3.01728	2.84151	2.77558	1.78738	2.94823	2.27302	2.98767	3.10713	3.19035	2.35559	2.39529	3.11229	3.19166	2.39729
1.014	2.98856	2.91782	3.17197	1.93236	-0.0929818	0.045048	1.86095	2.34991	1.71188	2.03779	2.64871	3.02071	2.9723	3.3888	3.01393	2.83812	2.77221	1.7817	2.94264	2.26668	2.98212	3.10171	3.18502	2.34934	2.38908	3.10687	3.18633	2.39108
1.015	2.98428	2.91346	3.16789	1.92694	-0.100612	0.0375439	1.85545	2.34494	1.7062	2.03247	2.64517	3.01748	2.96902	3.38597	3.01057	2.83473	2.76884	1.77602	2.93704	2.26035	2.97657	3.0963	3.17969	2.34309	2.38288	3.10145	3.181	2.38488
1.016	2.98001	2.90909	3.16381	1.92153	-0.108242	0.0300397	1.84995	2.33996	1.70053	2.02714	2.64164	3.01425	2.96574	3.38315	3.00722	2.83134	2.76546	1.77034	2.93145	2.25401	2.97102	3.09088	3.17436	2.33684	2.37667	3.09603	3.17567	2.37867
1.017	2.97574	2.90473	3.15973	1.91612	-0.115871	0.0225355	1.84445	2.33498	1.69485	2.02181	2.63811	3.01102	2.96246	3.38032	3.00387	2.82795	2.76209	1.76466	2.92586	2.24767	2.96547	3.08546	3.16903	2.33059	2.37047	3.09062	3.17034	2.37246
1.018	2.97147	2.90036	3.15565	1.9107	-0.123501	0.0150313	1.83895	2.33	1.68918	2.01649	2.63458	3.0078	2.95918	3.37749	3.00052	2.82456	2.75872	1.75898	2.92026	2.24134	2.95992	3.08004	3.1637	2.32435	2.36426	3.0852	3.16501	2.36626
1.019	2.96719	2.896	3.15157	1.90529	-0.131131	0.00752715	1.83345	2.32503	1.68351	2.01116	2.63105	3.00457	2.9559	3.37466	2.99716	2.82117	2.75534	1.7533	2.91467	2.235	2.95437	3.07463	3.15837	2.3181	2.35805	3.07978	3.15968	2.36005
1.02	2.96292	2.89163	3.14749	1.89988	-0.138761	2.3e-05	1.82795	2.32005	1.67783	2.00584	2.62752	3.00134	2.95262	3.37183	2.99381	2.81778	2.75197	1.74762	2.90908	2.22866	2.94882	3.06921	3.15304	2.31185	2.35185	3.07436	3.15435	2.35385
1.021	2.95865	2.88727	3.14341	1.89446	-0.146391	-0.0074812	1.82245	2.31507	1.67216	2.00051	2.62399	2.99811	2.94934	3.369	2.99046	2.81439	2.74859	1.74194	2.90349	2.22233	2.94327	3.06379	3.14771	2.3056	2.34564	3.06895	3.14903	2.34764
1.022	2.95438	2.88291	3.13933	1.88905	-0.154021	-0.0149854	1.81695	2.3101	1.66648	1.99518	2.62046	2.99488	2.94606	3.36617	2.9871	2.811	2.74522	1.73626	2.89789	2.21599	2.93772	3.05837	3.14238	2.29935	2.33944	3.06353	3.1437	2.34143
1.023	2.95011	2.87854	3.13525	1.88364	-0.16165	-0.0224896	1.81145	2.30512	1.66081	1.98986	2.61692	2.99165	2.94278	3.36334	2.98375	2.80761	2.74185	1.73058	2.8923	2.20965	2.93218	3.05296	3.13705	2.2931	2.33323	3.05811	3.13837	2.33523
1.024	2.94583	2.87418	3.13117	1.87822	-0.16928	-0.0299937	1.80595	2.30014	1.65513	1.98453	2.61339	2.98842	2.93949	3.3605	2.9804	2.80422	2.73847	1.7249	2.88671	2.20332	2.92663	3.04754	3.13172	2.28685	2.32703	3.05269	3.13304	2.32902
1.025	2.94156	2.86981	3.12709	1.87281	-0.17691	-0.0374979	1.80045	2.29516	1.64946	1.9792	2.60986	2.98519	2.93621	3.35767	2.97704	2.80083	2.7351	1.71922	2.88111	2.19698	2.92108	3.04212	3.12639	2.2806	2.32082	3.04728	3.12771	2.32282
1.026	2.93729	2.86545	3.12301	1.8674	-0.18454	-0.0450021	1.79495	2.29019	1.64379	1.97388	2.60633	2.98196	2.93293	3.35483	2.97369	2.79744	2.73172	1.71354	2.87552	2.19064	2.91553	3.0367	3.12106	2.27435	2.31461	3.04186	3.12238	2.31661
1.027	2.93302	2.86109	3.11893	1.86198	-0.19217	-0.0525063	1.78945	2.28521	1.63811	1.96855	2.6028	2.97873	2.92965	3.352	2.97033	2.79405	2.72835	1.70786	2.86993	2.18431	2.90998	3.03129	3.11573	2.2681	2.30841	3.03644	3.11705	2.31041
1.028	2.92874	2.85672	3.11485	1.85657	-0.1998	-0.0600105	1.78395	2.28023	1.63244	1.96323	2.59926	2.9755	2.92637	3.34916	2.96698	2.79066	2.72497	1.70218	2.86434	2.17797	2.90443	3.02587	3.1104	2.26185	2.3022	3.03102	3.11172	2.3042
1.029	2.92447	2.85236	3.11077	1.85116	-0.207429	-0.0675146	1.77845	2.27526	1.62676	1.9579	2.59573	2.97227	2.92308	3.34632	2.96362	2.78727	2.7216	1.6965	2.85874	2.17163	2.89888	3.02045	3.10507	2.25561	2.296	3.02561	3.10639	2.29799
1.03	2.9202	2.84799	3.10669	1.84574	-0.215059	-0.0750188	1.77295	2.27028	1.62109	1.95257	2.5922	2.96904	2.9198	3.34348	2.96027	2.78387	2.71822	1.69082	2.85315	2.1653	2.89333	3.01503	3.09974	2.24936	2.28979	3.02019	3.10106	2.29179
1.031	2.91593	2.84363	3.10261	1.84033	-0.222689	-0.082523	1.76745	2.2653	1.61541	1.94725	2.58867	2.96581	2.91652	3.34065	2.95691	2.78048	2.71485	1.68514	2.84756	2.15896	2.88778	3.00962	3.09441	2.24311	2.28359	3.01477	3.09573	2.28558
1.032	2.91166	2.83926	3.09854	1.83492	-0.230319	-0.0900272	1.76194	2.26033	1.60974	1.94192	2.58514	2.96257	2.91323	3.33781	2.95356	2.77709	2.71147	1.67946	2.84196	2.15262	2.88223	3.0042	3.08908	2.23686	2.27738	3.00936	3.0904	2.27938
1.033	2.90738	2.8349	3.09446	1.8295	-0.237949	-0.0975314	1.75644	2.25535	1.60407	1.93659	2.5816	2.95934	2.90995	3.33497	2.9502	2.7737	2.7081	1.67378	2.83637	2.14629	2.87669	2.99878	3.08375	2.23061	2.27118	3.00394	3.08507	2.27317
1.034	2.90311	2.83054	3.09038	1.82409	-0.245579	-0.105036	1.75094	2.25037	1.59839	1.93127	2.57807	2.95611	2.90667	3.33212	2.94685	2.77031	2.70472	1.6681	2.83078	2.13995	2.87114	2.99336	3.07842	2.22436	2.26497	2.99852	3.07974	2.26697
1.035	2.89884	2.82617	3.0863	1.81867	-0.253209	-0.11254	1.74544	2.24539	1.59272	1.92594	2.57454	2.95288	2.90338	3.32928	2.94349	2.76692	2.70135	1.66242	2.82519	2.13362	2.86559	2.98795	3.07309	2.21811	2.25876	2.9931	3.07441	2.26076
1.036	2.89457	2.82181	3.08222	1.81326	-0.260838	-0.120044	1.73994	2.24042	1.58704	1.92062	2.57101	2.94964	2.9001	3.32644	2.94013	2.76353	2.69797	1.65674	2.81959	2.12728	2.86004	2.98253	3.06776	2.21186	2.25256	2.98769	3.06908	2.25455
1.037	2.8903	2.81744	3.07814	1.80785	-0.268468	-0.127548	1.73444	2.23544	1.58137	1.91529	2.56747	2.94641	2.89682	3.3236	2.93678	2.76014	2.6946	1.65106	2.814	2.12094	2.85449	2.97711	3.06243	2.20561	2.24635	2.98227	3.06375	2.24835
1.038	2.88602	2.81308	3.07406	1.80243	-0.276098	-0.135052	1.72894	2.23046	1.57569	1.90996	2.56394	2.94318	2.89353	3.32075	2.93342	2.75675	2.69122	1.64538	2.80841	2.11461	2.84894	2.97169	3.0571	2.19936	2.24015	2.97685	3.05842	2.24214
1.039	2.88175	2.80871	3.06998	1.79702	-0.283728	-0.142556	1.72344	2.22549	1.57002	1.90464	2.56041	2.93995	2.89025	3.31791	2.93006	2.75336	2.68784	1.6397	2.80281	2.10827	2.84339	2.96628	3.05177	2.19311	2.23394	2.97143	3.05309	2.23594
1.04	2.87748	2.80435	3.0659	1.79161	-0.291358	-0.150061	1.71794	2.22051	1.56434	1.89931	2.55687	2.93671	2.88696	3.31506	2.92671	2.74997	2.68447	1.63402	2.79722	2.10193	2.83784	2.96086	3.04644	2.18686	2.22774	2.96602	3.04776	2.22973
1.041	2.87321	2.79999	3.06182	1.78619	-0.298988	-0.157565	1.71244	2.21553	1.55867	1.89398	2.55334	2.93348	2.88368	3.31222	2.92335	2.74658	2.68109	1.62833	2.79163	2.0956	2.83229	2.95544	3.04111	2.18062	2.22153	2.9606	3.04243	2.22353
1.042	2.86893	2.79562	3.05774	1.78078	-0.306617	-0.165069	1.70694	2.21055	1.553	1.88866	2.54981	2.93024	2.88039	3.30937	2.91999	2.74319	2.67772	1.62265	2.78604	2.08926	2.82674	2.95002	3.03578	2.17437	2.21533	2.95518	3.0371	2.21732
1.043	2.86466	2.79126	3.05366	1.77537	-0.314247	-0.172573	1.70144	2.20558	1.54732	1.88333	2.54628	2.92701	2.87711	3.30652	2.91663	2.7398	2.67434	1.61697	2.78044	2.08292	2.8212	2.94461	3.03045	2.16812	2.20912	2.94976	3.03177	2.21111
1.044	2.86039	2.78689	3.04958	1.76995	-0.321877	-0.180077	1.69594	2.2006	1.54165	1.878	2.54274	2.92378	2.87382	3.30367	2.91328	2.73641	2.67096	1.61129	2.77485	2.07659	2.81565	2.93919	3.02512	2.16187	2.20291	2.94435	3.02644	2.20491
1.045	2.85612	2.78253	3.0455	1.76454	-0.329507	-0.187582	1.69044	2.19562	1.53597	1.87268	2.53921	2.92054	2.87054	3.30082	2.90992	2.73301	2.66759	1.60561	2.76926	2.07025	2.8101	2.93377	3.01979	2.15562	2.19671	2.93893	3.02111	2.1987
1.046	2.85185	2.77817	3.04142	1.75913	-0.337137	-0.195086	1.68494	2.19065	1.5303	1.86735	2.53568	2.91731	2.86725	3.29797	2.90656	2.72962	2.66421	1.59993	2.76366	2.06391	2.80455	2.92835	3.01446	2.14937	2.1905	2.93351	3.01578	2.1925
1.047	2.84757	2.7738	3.03734	1.75371	-0.344767	-0.20259	1.67944	2.18567	1.52462	1.86203	2.53214	2.91407	2.86397	3.29512	2.9032	2.72623	2.66084	1.59425	2.75807	2.05758	2.799	2.92294	3.00913	2.14312	2.1843	2.92809	3.01045	2.18629
1.048	2.8433	2.76944	3.03326	1.7483	-0.352396	-0.210094	1.67394	2.18069	1.51895	1.8567	2.52861	2.91084	2.86068	3.29227	2.89984	2.72284	2.65746	1.58857	2.75248	2.05124	2.79345	2.91752	3.0038	2.13687	2.17809	2.92268	3.00512	2.18009
1.049	2.83903	2.76507	3.02918	1.74289	-0.360026	-0.217598	1.66844	2.17572	1.51328	1.85137	2.52508	2.9076	2.85739	3.28942	2.89649	2.71945	2.65408	1.58289	2.74689	2.0449	2.7879	2.9121	2.99847	2.13062	2.17189	2.91726	2.99979	2.17388
1.05	2.83476	2.76071	3.0251	1.73747	-0.367656	-0.225102	1.66294	2.17074	1.5076	1.84605	2.52154	2.90437	2.85411	3.28657	2.89313	2.71606	2.65071	1.57721	2.74129	2.03857	2.78235	2.90668	2.99314	2.12437	2.16568	2.91184	2.99446	2.16767
1.051	2.83048	2.75634	3.02103	1.73206	-0.375286	-0.232607	1.65744	2.16576	1.50193	1.84072	2.51801	2.90113	2.85082	3.28372	2.88977	2.71267	2.64733	1.57153	2.7357	2.03223	2.7768	2.90127	2.98781	2.11812	2.15948	2.90642	2.98913	2.16147
1.052	2.82621	2.75198	3.01695	1.72665	-0.382916	-0.240111	1.65194	2.16078	1.49625	1.83539	2.51448	2.8979	2.84754	3.28086	2.88641	2.70928	2.64395	1.56585	2.73011	2.02589	2.77125	2.89585	2.98248	2.11188	2.15327	2.90101	2.9838	2.15526
1.053	2.82194	2.74762	3.01287	1.72123	-0.390546	-0.247615	1.64644	2.15581	1.49058	1.83007	2.51094	2.89466	2.84425	3.27801	2.88305	2.70589	2.64057	1.56017	2.72451	2.01956	2.7657	2.89043	2.97715	2.10563	2.14706	2.89559	2.97847	2.14906
1.054	2.81767	2.74325	3.00879	1.71582	-0.398176	-0.255119	1.64094	2.15083	1.4849	1.82474	2.50741	2.89142	2.84096	3.27515	2.87969	2.70249	2.6372	1.55449	2.71892	2.01322	2.76016	2.88501	2.97182	2.09938	2.14086	2.89017	2.97314	2.14285
1.055	2.8134	2.73889	3.00471	1.71041	-0.405805	-0.262623	1.63543	2.14585	1.47923	1.81942	2.50387	2.88819	2.83768	3.2723	2.87633	2.6991	2.63382	1.54881	2.71333	2.00688	2.75461	2.8796	2.9665	2.09313	2.13465	2.88475	2.96782	2.13665
1.056	2.80912	2.73452	3.00063	1.70499	-0.413435	-0.270128	1.62993	2.14088	1.47356	1.81409	2.50034	2.88495	2.83439	3.26944	2.87297	2.69571	2.63044	1.54313	2.70773	2.00055	2.74906	2.87418	2.96117	2.08688	2.12845	2.87934	2.96249	2.13044
1.057	2.80485	2.73016	2.99655	1.69958	-0.421065	-0.277632	1.62443	2.1359	1.46788	1.80876	2.49681	2.88171	2.8311	3.26658	2.86961	2.69232	2.62707	1.53745	2.70214	1.99421	2.74351	2.86876	2.95584	2.08063	2.12224	2.87392	2.95716	2.12423
1.058	2.80058	2.72579	2.99247	1.69417	-0.428695	-0.285136	1.61893	2.13092	1.46221	1.80344	2.49327	2.87848	2.82781	3.26373	2.86625	2.68893	2.62369	1.53177	2.69655	1.98788	2.73796	2.86334	2.95051	2.07438	2.11604	2.8685	2.95183	2.11803
1.059	2.79631	2.72143	2.98839	1.68875	-0.436325	-0.29264	1.61343	2.12594	1.45653	1.79811	2.48974	2.87524	2.82453	3.26087	2.86289	2.68554	2.62031	1.52609	2.69096	1.98154	2.73241	2.85793	2.94518	2.06813	2.10983	2.86308	2.9465	2.11182
1.06	2.79203	2.71707	2.98431	1.68334	-0.443954	-0.300144	1.60793	2.12097	1.45086	1.79278	2.4862	2.872	2.82124	3.25801	2.85953	2.68215	2.61693	1.52041	2.68536	1.9752	2.72686	2.85251	2.93985	2.06188	2.10363	2.85767	2.94117	2.10562
1.061	2.78776	2.7127	2.98023	1.67792	-0.451584	-0.307648	1.60243	2.11599	1.44518	1.78746	2.48267	2.86877	2.81795	3.25515	2.85617	2.67876	2.61355	1.51473	2.67977	1.96887	2.72131	2.84709	2.93452	2.05563	2.09742	2.85225	2.93584	2.09941
1.062	2.78349	2.70834	2.97615	1.67251	-0.459214	-0.315153	1.59693	2.11101	1.43951	1.78213	2.47914	2.86553	2.81466	3.25229	2.85281	2.67536	2.61018	1.50905	2.67418	1.96253	2.71576	2.84167	2.92919	2.04938	2.09121	2.84683	2.93051	2.09321
1.063	2.77922	2.70397	2.97207	1.6671	-0.466844	-0.322657	1.59143	2.10604	1.43383	1.77681	2.4756	2.86229	2.81137	3.24943	2.84945	2.67197	2.6068	1.50337	2.66858	1.95619	2.71021	2.83626	2.92386	2.04314	2.08501	2.84141	2.92518	2.087
1.064	2.77495	2.69961	2.96799	1.66168	-0.474474	-0.330161	1.58593	2.10106	1.42816	1.77148	2.47207	2.85905	2.80809	3.24657	2.84608	2.66858	2.60342	1.49769	2.66299	1.94986	2.70467	2.83084	2.91853	2.03689	2.0788	2.836	2.91985	2.08079
1.065	2.77067	2.69525	2.96391	1.65627	-0.482104	-0.337665	1.58043	2.09608	1.42249	1.76615	2.46853	2.85581	2.8048	3.24371	2.84272	2.66519	2.60004	1.49201	2.6574	1.94352	2.69912	2.82542	2.9132	2.03064	2.0726	2.83058	2.91452	2.07459
1.066	2.7664	2.69088	2.95983	1.65086	-0.489734	-0.345169	1.57493	2.09111	1.41681	1.76083	2.465	2.85258	2.80151	3.24084	2.83936	2.6618	2.59667	1.48633	2.65181	1.93718	2.69357	2.82	2.90787	2.02439	2.06639	2.82516	2.90919	2.06838
1.067	2.76213	2.68652	2.95575	1.64544	-0.497363	-0.352673	1.56943	2.08613	1.41114	1.7555	2.46147	2.84934	2.79822	3.23798	2.836	2.65841	2.59329	1.48065	2.64621	1.93085	2.68802	2.81459	2.90254	2.01814	2.06019	2.81974	2.90386	2.06218
1.068	2.75786	2.68215	2.95167	1.64003	-0.504993	-0.360178	1.56393	2.08115	1.40546	1.75017	2.45793	2.8461	2.79493	3.23512	2.83264	2.65501	2.58991	1.47497	2.64062	1.92451	2.68247	2.80917	2.89721	2.01189	2.05398	2.81433	2.89853	2.05597
1.069	2.75359	2.67779	2.94759	1.63462	-0.512623	-0.367682	1.55843	2.07617	1.39979	1.74485	2.4544	2.84286	2.79164	3.23225	2.82928	2.65162	2.58653	1.46929	2.63503	1.91817	2.67692	2.80375	2.89188	2.00564	2.04777	2.80891	2.8932	2.04977
1.07	2.74931	2.67342	2.94352	1.6292	-0.520253	-0.375186	1.55293	2.0712	1.39411	1.73952	2.45086	2.83962	2.78835	3.22939	2.82591	2.64823	2.58315	1.46361	2.62943	1.91184	2.67137	2.79833	2.88655	1.99939	2.04157	2.80349	2.88787	2.04356
1.071	2.74504	2.66906	2.93944	1.62379	-0.527883	-0.38269	1.54743	2.06622	1.38844	1.73419	2.44733	2.83638	2.78507	3.22652	2.82255	2.64484	2.57977	1.45793	2.62384	1.9055	2.66582	2.79292	2.88122	1.99314	2.03536	2.79807	2.88254	2.03735
1.072	2.74077	2.6647	2.93536	1.61838	-0.535513	-0.390194	1.54193	2.06124	1.38277	1.72887	2.44379	2.83314	2.78178	3.22366	2.81919	2.64145	2.5764	1.45225	2.61825	1.89916	2.66027	2.7875	2.87589	1.98689	2.02916	2.79266	2.87721	2.03115
1.073	2.7365	2.66033	2.93128	1.61296	-0.543142	-0.397699	1.53643	2.05627	1.37709	1.72354	2.44026	2.8299	2.77849	3.22079	2.81583	2.63806	2.57302	1.44657	2.61266	1.89283	2.65472	2.78208	2.87056	1.98064	2.02295	2.78724	2.87188	2.02494
1.074	2.73222	2.65597	2.9272	1.60755	-0.550772	-0.405203	1.53093	2.05129	1.37142	1.71822	2.43672	2.82666	2.7752	3.21792	2.81247	2.63466	2.56964	1.44089	2.60706	1.88649	2.64918	2.77666	2.86523	1.9744	2.01675	2.78182	2.86655	2.01874
1.075	2.72795	2.6516	2.92312	1.60214	-0.558402	-0.412707	1.52543	2.04631	1.36574	1.71289	2.43319	2.82342	2.77191	3.21506	2.8091	2.63127	2.56626	1.43521	2.60147	1.88015	2.64363	2.77125	2.8599	1.96815	2.01054	2.7764	2.86122	2.01253
1.076	2.72368	2.64724	2.91904	1.59672	-0.566032	-0.420211	1.51993	2.04133	1.36007	1.70756	2.42965	2.82018	2.76862	3.21219	2.80574	2.62788	2.56288	1.42952	2.59588	1.87382	2.63808	2.76583	2.85457	1.9619	2.00434	2.77099	2.85589	2.00632
1.077	2.71941	2.64288	2.91496	1.59131	-0.573662	-0.427715	1.51442	2.03636	1.35439	1.70224	2.42612	2.81694	2.76533	3.20932	2.80238	2.62449	2.5595	1.42384	2.59028	1.86748	2.63253	2.76041	2.84924	1.95565	1.99813	2.76557	2.85056	2.00012
1.078	2.71514	2.63851	2.91088	1.5859	-0.581292	-0.435219	1.50892	2.03138	1.34872	1.69691	2.42258	2.8137	2.76204	3.20645	2.79901	2.6211	2.55612	1.41816	2.58469	1.86114	2.62698	2.75499	2.84391	1.9494	1.99192	2.76015	2.84523	1.99391
1.079	2.71086	2.63415	2.9068	1.58048	-0.588921	-0.442724	1.50342	2.0264	1.34305	1.69158	2.41905	2.81046	2.75875	3.20358	2.79565	2.61771	2.55274	1.41248	2.5791	1.85481	2.62143	2.74958	2.83858	1.94315	1.98572	2.75473	2.8399	1.98771
1.08	2.70659	2.62978	2.90272	1.57507	-0.596551	-0.450228	1.49792	2.02143	1.33737	1.68626	2.41551	2.80722	2.75546	3.20071	2.79229	2.61431	2.54936	1.4068	2.57351	1.84847	2.61588	2.74416	2.83325	1.9369	1.97951	2.74932	2.83457	1.9815
1.081	2.70232	2.62542	2.89864	1.56966	-0.604181	-0.457732	1.49242	2.01645	1.3317	1.68093	2.41198	2.80398	2.75217	3.19784	2.78892	2.61092	2.54598	1.40112	2.56791	1.84214	2.61033	2.73874	2.82792	1.93065	1.97331	2.7439	2.82924	1.9753
1.082	2.69805	2.62105	2.89456	1.56424	-0.611811	-0.465236	1.48692	2.01147	1.32602	1.67561	2.40844	2.80074	2.74888	3.19497	2.78556	2.60753	2.54261	1.39544	2.56232	1.8358	2.60478	2.73332	2.82259	1.9244	1.9671	2.73848	2.82391	1.96909
1.083	2.69377	2.61669	2.89048	1.55883	-0.619441	-0.47274	1.48142	2.0065	1.32035	1.67028	2.40491	2.7975	2.74559	3.1921	2.7822	2.60414	2.53923	1.38976	2.55673	1.82946	2.59923	2.72791	2.81726	1.91815	1.9609	2.73306	2.81858	1.96288
1.084	2.6895	2.61233	2.8864	1.55342	-0.627071	-0.480245	1.47592	2.00152	1.31467	1.66495	2.40137	2.79426	2.7423	3.18922	2.77883	2.60075	2.53585	1.38408	2.55113	1.82313	2.59368	2.72249	2.81193	1.9119	1.95469	2.72765	2.81325	1.95668
1.085	2.68523	2.60796	2.88232	1.548	-0.634701	-0.487749	1.47042	1.99654	1.309	1.65963	2.39784	2.79102	2.739	3.18635	2.77547	2.59735	2.53247	1.3784	2.54554	1.81679	2.58814	2.71707	2.8066	1.90566	1.94849	2.72223	2.80792	1.95047
1.086	2.68096	2.6036	2.87824	1.54259	-0.64233	-0.495253	1.46492	1.99156	1.30333	1.6543	2.3943	2.78778	2.73571	3.18348	2.7721	2.59396	2.52909	1.37272	2.53995	1.81045	2.58259	2.71165	2.80127	1.89941	1.94228	2.71681	2.80259	1.94427
1.087	2.67669	2.59923	2.87416	1.53717	-0.64996	-0.502757	1.45942	1.98659	1.29765	1.64897	2.39077	2.78453	2.73242	3.1806	2.76874	2.59057	2.52571	1.36704	2.53436	1.80412	2.57704	2.70624	2.79594	1.89316	1.93607	2.71139	2.79726	1.93806
1.088	2.67241	2.59487	2.87008	1.53176	-0.65759	-0.510261	1.45392	1.98161	1.29198	1.64365	2.38723	2.78129	2.72913	3.17773	2.76537	2.58718	2.52233	1.36136	2.52876	1.79778	2.57149	2.70082	2.79061	1.88691	1.92987	2.70598	2.79194	1.93186
1.089	2.66814	2.5905	2.86601	1.52635	-0.66522	-0.517765	1.44842	1.97663	1.2863	1.63832	2.3837	2.77805	2.72584	3.17485	2.76201	2.58378	2.51895	1.35568	2.52317	1.79144	2.56594	2.6954	2.78528	1.88066	1.92366	2.70056	2.78661	1.92565
1.09	2.66387	2.58614	2.86193	1.52093	-0.67285	-0.52527	1.44292	1.97166	1.28063	1.633	2.38016	2.77481	2.72255	3.17198	2.75864	2.58039	2.51557	1.35	2.51758	1.78511	2.56039	2.68998	2.77995	1.87441	1.91746	2.69514	2.78128	1.91944
1.091	2.6596	2.58178	2.85785	1.51552	-0.68048	-0.532774	1.43742	1.96668	1.27495	1.62767	2.37663	2.77157	2.71926	3.1691	2.75528	2.577	2.51219	1.34432	2.51198	1.77877	2.55484	2.68457	2.77462	1.86816	1.91125	2.68972	2.77595	1.91324
1.092	2.65532	2.57741	2.85377	1.51011	-0.68811	-0.540278	1.43192	1.9617	1.26928	1.62234	2.37309	2.76832	2.71597	3.16623	2.75191	2.57361	2.50881	1.33864	2.50639	1.77243	2.54929	2.67915	2.76929	1.86191	1.90505	2.68431	2.77062	1.90703
1.093	2.65105	2.57305	2.84969	1.50469	-0.695739	-0.547782	1.42642	1.95672	1.2636	1.61702	2.36955	2.76508	2.71267	3.16335	2.74855	2.57022	2.50543	1.33296	2.5008	1.7661	2.54374	2.67373	2.76396	1.85566	1.89884	2.67889	2.76529	1.90083
1.094	2.64678	2.56868	2.84561	1.49928	-0.703369	-0.555286	1.42092	1.95175	1.25793	1.61169	2.36602	2.76184	2.70938	3.16047	2.74518	2.56682	2.50205	1.32728	2.49521	1.75976	2.53819	2.66831	2.75863	1.84941	1.89264	2.67347	2.75996	1.89462
1.095	2.64251	2.56432	2.84153	1.49387	-0.710999	-0.56279	1.41542	1.94677	1.25226	1.60636	2.36248	2.7586	2.70609	3.15759	2.74182	2.56343	2.49867	1.3216	2.48961	1.75342	2.53265	2.6629	2.7533	1.84316	1.88643	2.66805	2.75463	1.88842
1.096	2.63824	2.55996	2.83745	1.48845	-0.718629	-0.570295	1.40992	1.94179	1.24658	1.60104	2.35895	2.75535	2.7028	3.15471	2.73845	2.56004	2.49529	1.31592	2.48402	1.74709	2.5271	2.65748	2.74797	1.83692	1.88022	2.66264	2.7493	1.88221
1.097	2.63396	2.55559	2.83337	1.48304	-0.726259	-0.577799	1.40442	1.93682	1.24091	1.59571	2.35541	2.75211	2.69951	3.15184	2.73509	2.55665	2.49191	1.31024	2.47843	1.74075	2.52155	2.65206	2.74264	1.83067	1.87402	2.65722	2.74397	1.876
1.098	2.62969	2.55123	2.82929	1.47763	-0.733889	-0.585303	1.39892	1.93184	1.23523	1.59038	2.35188	2.74887	2.69621	3.14896	2.73172	2.55325	2.48853	1.30456	2.47283	1.73441	2.516	2.64664	2.73731	1.82442	1.86781	2.6518	2.73864	1.8698
1.099	2.62542	2.54686	2.82521	1.47221	-0.741518	-0.592807	1.39341	1.92686	1.22956	1.58506	2.34834	2.74562	2.69292	3.14608	2.72836	2.54986	2.48515	1.29888	2.46724	1.72808	2.51045	2.64123	2.73198	1.81817	1.86161	2.64638	2.73331	1.86359
1.1	2.62115	2.5425	2.82113	1.4668	-0.749148	-0.600311	1.38791	1.92189	1.22388	1.57973	2.3448	2.74238	2.68963	3.1432	2.72499	2.54647	2.48177	1.2932	2.46165	1.72174	2.5049	2.63581	2.72666	1.81192	1.8554	2.64097	2.72798	1.85739
1.101	2.61687	2.53813	2.81705	1.46139	-0.756778	-0.607816	1.38241	1.91691	1.21821	1.57441	2.34127	2.73914	2.68634	3.14031	2.72162	2.54308	2.47839	1.28752	2.45606	1.7154	2.49935	2.63039	2.72133	1.80567	1.8492	2.63555	2.72265	1.85118
1.102	2.6126	2.53377	2.81297	1.45597	-0.764408	-0.61532	1.37691	1.91193	1.21254	1.56908	2.33773	2.73589	2.68304	3.13743	2.71826	2.53969	2.47501	1.28184	2.45046	1.70907	2.4938	2.62497	2.716	1.79942	1.84299	2.63013	2.71732	1.84498
1.103	2.60833	2.52941	2.80889	1.45056	-0.772038	-0.622824	1.37141	1.90695	1.20686	1.56375	2.3342	2.73265	2.67975	3.13455	2.71489	2.53629	2.47163	1.27616	2.44487	1.70273	2.48825	2.61956	2.71067	1.79317	1.83679	2.62471	2.71199	1.83877
1.104	2.60406	2.52504	2.80481	1.44515	-0.779668	-0.630328	1.36591	1.90198	1.20119	1.55843	2.33066	2.7294	2.67646	3.13167	2.71153	2.5329	2.46825	1.27048	2.43928	1.6964	2.4827	2.61414	2.70534	1.78692	1.83058	2.6193	2.70666	1.83256
1.105	2.59979	2.52068	2.80073	1.43973	-0.787297	-0.637832	1.36041	1.897	1.19551	1.5531	2.32712	2.72616	2.67316	3.12879	2.70816	2.52951	2.46487	1.2648	2.43368	1.69006	2.47716	2.60872	2.70001	1.78067	1.82437	2.61388	2.70133	1.82636
1.106	2.59551	2.51631	2.79665	1.43432	-0.794927	-0.645336	1.35491	1.89202	1.18984	1.54777	2.32359	2.72292	2.66987	3.1259	2.70479	2.52612	2.46149	1.25912	2.42809	1.68372	2.47161	2.6033	2.69468	1.77442	1.81817	2.60846	2.696	1.82015
1.107	2.59124	2.51195	2.79257	1.42891	-0.802557	-0.652841	1.34941	1.88705	1.18416	1.54245	2.32005	2.71967	2.66658	3.12302	2.70143	2.52272	2.4581	1.25344	2.4225	1.67739	2.46606	2.59789	2.68935	1.76817	1.81196	2.60304	2.69067	1.81395
1.108	2.58697	2.50758	2.7885	1.42349	-0.810187	-0.660345	1.34391	1.88207	1.17849	1.53712	2.31652	2.71643	2.66328	3.12013	2.69806	2.51933	2.45472	1.24776	2.41691	1.67105	2.46051	2.59247	2.68402	1.76193	1.80576	2.59763	2.68534	1.80774
1.109	2.5827	2.50322	2.78442	1.41808	-0.817817	-0.667849	1.33841	1.87709	1.17282	1.5318	2.31298	2.71318	2.65999	3.11725	2.69469	2.51594	2.45134	1.24208	2.41131	1.66471	2.45496	2.58705	2.67869	1.75568	1.79955	2.59221	2.68001	1.80154
1.11	2.57843	2.49886	2.78034	1.41267	-0.825447	-0.675353	1.33291	1.87211	1.16714	1.52647	2.30944	2.70994	2.6567	3.11437	2.69132	2.51255	2.44796	1.2364	2.40572	1.65838	2.44941	2.58163	2.67336	1.74943	1.79335	2.58679	2.67468	1.79533
1.111	2.57415	2.49449	2.77626	1.40725	-0.833076	-0.682857	1.32741	1.86714	1.16147	1.52114	2.30591	2.70669	2.6534	3.11148	2.68796	2.50915	2.44458	1.23072	2.40013	1.65204	2.44386	2.57622	2.66803	1.74318	1.78714	2.58137	2.66935	1.78912
1.112	2.56988	2.49013	2.77218	1.40184	-0.840706	-0.690362	1.32191	1.86216	1.15579	1.51582	2.30237	2.70345	2.65011	3.10859	2.68459	2.50576	2.4412	1.22503	2.39453	1.6457	2.43831	2.5708	2.6627	1.73693	1.78093	2.57596	2.66402	1.78292
1.113	2.56561	2.48576	2.7681	1.39642	-0.848336	-0.697866	1.31641	1.85718	1.15012	1.51049	2.29883	2.7002	2.64682	3.10571	2.68122	2.50237	2.43782	1.21935	2.38894	1.63937	2.43276	2.56538	2.65737	1.73068	1.77473	2.57054	2.65869	1.77671
1.114	2.56134	2.4814	2.76402	1.39101	-0.855966	-0.70537	1.31091	1.85221	1.14444	1.50516	2.2953	2.69696	2.64352	3.10282	2.67786	2.49897	2.43444	1.21367	2.38335	1.63303	2.42721	2.55996	2.65204	1.72443	1.76852	2.56512	2.65336	1.77051
1.115	2.55706	2.47704	2.75994	1.3856	-0.863596	-0.712874	1.30541	1.84723	1.13877	1.49984	2.29176	2.69371	2.64023	3.09993	2.67449	2.49558	2.43106	1.20799	2.37776	1.62669	2.42167	2.55455	2.64671	1.71818	1.76232	2.5597	2.64803	1.7643
1.116	2.55279	2.47267	2.75586	1.38018	-0.871226	-0.720378	1.29991	1.84225	1.13309	1.49451	2.28823	2.69047	2.63693	3.09705	2.67112	2.49219	2.42767	1.20231	2.37216	1.62036	2.41612	2.54913	2.64138	1.71193	1.75611	2.55429	2.6427	1.7581
1.117	2.54852	2.46831	2.75178	1.37477	-0.878856	-0.727882	1.29441	1.83728	1.12742	1.48919	2.28469	2.68722	2.63364	3.09416	2.66775	2.4888	2.42429	1.19663	2.36657	1.61402	2.41057	2.54371	2.63605	1.70568	1.74991	2.54887	2.63737	1.75189
1.118	2.54425	2.46394	2.7477	1.36936	-0.886485	-0.735387	1.28891	1.8323	1.12175	1.48386	2.28115	2.68398	2.63035	3.09127	2.66438	2.4854	2.42091	1.19095	2.36098	1.60768	2.40502	2.53829	2.63072	1.69943	1.7437	2.54345	2.63204	1.74568
1.119	2.53998	2.45958	2.74362	1.36394	-0.894115	-0.742891	1.28341	1.82732	1.11607	1.47853	2.27762	2.68073	2.62705	3.08838	2.66102	2.48201	2.41753	1.18527	2.35538	1.60135	2.39947	2.53288	2.62539	1.69319	1.7375	2.53803	2.62671	1.73948
1.12	2.5357	2.45521	2.73954	1.35853	-0.901745	-0.750395	1.27791	1.82234	1.1104	1.47321	2.27408	2.67749	2.62376	3.08549	2.65765	2.47862	2.41415	1.17959	2.34979	1.59501	2.39392	2.52746	2.62006	1.68694	1.73129	2.53262	2.62138	1.73327
1.121	2.53143	2.45085	2.73546	1.35312	-0.909375	-0.757899	1.27241	1.81737	1.10472	1.46788	2.27054	2.67424	2.62046	3.0826	2.65428	2.47523	2.41077	1.17391	2.3442	1.58867	2.38837	2.52204	2.61473	1.68069	1.72508	2.5272	2.61605	1.72707
1.122	2.52716	2.44649	2.73138	1.3477	-0.917005	-0.765403	1.2669	1.81239	1.09905	1.46255	2.26701	2.67099	2.61717	3.07971	2.65091	2.47183	2.40739	1.16823	2.33861	1.58234	2.38282	2.51662	2.6094	1.67444	1.71888	2.52178	2.61073	1.72086
1.123	2.52289	2.44212	2.7273	1.34229	-0.924635	-0.772907	1.2614	1.80741	1.09337	1.45723	2.26347	2.66775	2.61387	3.07682	2.64754	2.46844	2.404	1.16255	2.33301	1.576	2.37727	2.51121	2.60407	1.66819	1.71267	2.51636	2.6054	1.71466
1.124	2.51861	2.43776	2.72322	1.33688	-0.932264	-0.780412	1.2559	1.80244	1.0877	1.4519	2.25993	2.6645	2.61058	3.07393	2.64417	2.46505	2.40062	1.15687	2.32742	1.56966	2.37172	2.50579	2.59874	1.66194	1.70647	2.51095	2.60007	1.70845
1.125	2.51434	2.43339	2.71914	1.33146	-0.939894	-0.787916	1.2504	1.79746	1.08203	1.44657	2.2564	2.66125	2.60728	3.07104	2.64081	2.46165	2.39724	1.15119	2.32183	1.56333	2.36617	2.50037	2.59341	1.65569	1.70026	2.50553	2.59474	1.70224
1.126	2.51007	2.42903	2.71506	1.32605	-0.947524	-0.79542	1.2449	1.79248	1.07635	1.44125	2.25286	2.65801	2.60399	3.06815	2.63744	2.45826	2.39386	1.14551	2.31623	1.55699	2.36063	2.49495	2.58808	1.64944	1.69406	2.50011	2.58941	1.69604
1.127	2.5058	2.42467	2.71098	1.32064	-0.955154	-0.802924	1.2394	1.7875	1.07068	1.43592	2.24932	2.65476	2.60069	3.06526	2.63407	2.45487	2.39048	1.13983	2.31064	1.55066	2.35508	2.48954	2.58275	1.64319	1.68785	2.49469	2.58408	1.68983
1.128	2.50153	2.4203	2.70691	1.31522	-0.962784	-0.810428	1.2339	1.78253	1.065	1.4306	2.24579	2.65151	2.5974	3.06236	2.6307	2.45148	2.3871	1.13415	2.30505	1.54432	2.34953	2.48412	2.57742	1.63694	1.68165	2.48928	2.57875	1.68363
1.129	2.49725	2.41594	2.70283	1.30981	-0.970414	-0.817933	1.2284	1.77755	1.05933	1.42527	2.24225	2.64827	2.5941	3.05947	2.62733	2.44808	2.38371	1.12847	2.29946	1.53798	2.34398	2.4787	2.57209	1.63069	1.67544	2.48386	2.57342	1.67742
1.13	2.49298	2.41157	2.69875	1.3044	-0.978043	-0.825437	1.2229	1.77257	1.05365	1.41994	2.23871	2.64502	2.59081	3.05658	2.62396	2.44469	2.38033	1.12279	2.29386	1.53165	2.33843	2.47328	2.56676	1.62445	1.66923	2.47844	2.56809	1.67121
1.131	2.48871	2.40721	2.69467	1.29898	-0.985673	-0.832941	1.2174	1.7676	1.04798	1.41462	2.23517	2.64177	2.58751	3.05368	2.62059	2.4413	2.37695	1.11711	2.28827	1.52531	2.33288	2.46787	2.56143	1.6182	1.66303	2.47302	2.56276	1.66501
1.132	2.48444	2.40284	2.69059	1.29357	-0.993303	-0.840445	1.2119	1.76262	1.04231	1.40929	2.23164	2.63853	2.58422	3.05079	2.61722	2.4379	2.37357	1.11143	2.28268	1.51897	2.32733	2.46245	2.5561	1.61195	1.65682	2.46761	2.55743	1.6588
1.133	2.48016	2.39848	2.68651	1.28816	-1.00093	-0.847949	1.2064	1.75764	1.03663	1.40396	2.2281	2.63528	2.58092	3.04789	2.61385	2.43451	2.37019	1.10575	2.27708	1.51264	2.32178	2.45703	2.55077	1.6057	1.65062	2.46219	2.5521	1.6526
1.134	2.47589	2.39412	2.68243	1.28274	-1.00856	-0.855453	1.2009	1.75267	1.03096	1.39864	2.22456	2.63203	2.57763	3.045	2.61048	2.43112	2.3668	1.10007	2.27149	1.5063	2.31623	2.45161	2.54544	1.59945	1.64441	2.45677	2.54677	1.64639
1.135	2.47162	2.38975	2.67835	1.27733	-1.01619	-0.862958	1.1954	1.74769	1.02528	1.39331	2.22103	2.62878	2.57433	3.0421	2.60711	2.42772	2.36342	1.09439	2.2659	1.49996	2.31068	2.4462	2.54011	1.5932	1.63821	2.45135	2.54144	1.64019
1.136	2.46735	2.38539	2.67427	1.27192	-1.02382	-0.870462	1.1899	1.74271	1.01961	1.38799	2.21749	2.62554	2.57103	3.03921	2.60375	2.42433	2.36004	1.08871	2.26031	1.49363	2.30514	2.44078	2.53478	1.58695	1.632	2.44594	2.53611	1.63398
1.137	2.46308	2.38102	2.67019	1.2665	-1.03145	-0.877966	1.1844	1.73773	1.01393	1.38266	2.21395	2.62229	2.56774	3.03631	2.60038	2.42094	2.35666	1.08303	2.25471	1.48729	2.29959	2.43536	2.52945	1.5807	1.6258	2.44052	2.53078	1.62777
1.138	2.4588	2.37666	2.66611	1.26109	-1.03908	-0.88547	1.1789	1.73276	1.00826	1.37733	2.21042	2.61904	2.56444	3.03342	2.59701	2.41755	2.35328	1.07735	2.24912	1.48095	2.29404	2.42994	2.52412	1.57445	1.61959	2.4351	2.52545	1.62157
1.139	2.45453	2.37229	2.66203	1.25567	-1.04671	-0.892974	1.1734	1.72778	1.00258	1.37201	2.20688	2.61579	2.56115	3.03052	2.59364	2.41415	2.34989	1.07167	2.24353	1.47462	2.28849	2.42453	2.51879	1.5682	1.61338	2.42968	2.52012	1.61536
1.14	2.45026	2.36793	2.65795	1.25026	-1.05434	-0.900479	1.1679	1.7228	0.99691	1.36668	2.20334	2.61254	2.55785	3.02762	2.59027	2.41076	2.34651	1.06599	2.23793	1.46828	2.28294	2.41911	2.51346	1.56195	1.60718	2.42427	2.51479	1.60916
1.141	2.44599	2.36357	2.65387	1.24485	-1.06197	-0.907983	1.1624	1.71783	0.991236	1.36135	2.1998	2.6093	2.55455	3.02473	2.5869	2.40737	2.34313	1.06031	2.23234	1.46194	2.27739	2.41369	2.50813	1.55571	1.60097	2.41885	2.50946	1.60295
1.142	2.44172	2.3592	2.64979	1.23943	-1.0696	-0.915487	1.1569	1.71285	0.985562	1.35603	2.19627	2.60605	2.55126	3.02183	2.58353	2.40397	2.33975	1.05463	2.22675	1.45561	2.27184	2.40827	2.5028	1.54946	1.59477	2.41343	2.50413	1.59675
1.143	2.43744	2.35484	2.64571	1.23402	-1.07723	-0.922991	1.1514	1.70787	0.979887	1.3507	2.19273	2.6028	2.54796	3.01893	2.58016	2.40058	2.33636	1.04895	2.22116	1.44927	2.26629	2.40286	2.49747	1.54321	1.58856	2.40801	2.4988	1.59054
1.144	2.43317	2.35047	2.64163	1.22861	-1.08486	-0.930495	1.14589	1.70289	0.974213	1.34538	2.18919	2.59955	2.54466	3.01603	2.57679	2.39719	2.33298	1.04327	2.21556	1.44293	2.26074	2.39744	2.49214	1.53696	1.58236	2.4026	2.49347	1.58433
1.145	2.4289	2.34611	2.63755	1.22319	-1.09249	-0.937999	1.14039	1.69792	0.968539	1.34005	2.18565	2.5963	2.54137	3.01313	2.57341	2.39379	2.3296	1.03759	2.20997	1.4366	2.25519	2.39202	2.48681	1.53071	1.57615	2.39718	2.48814	1.57813
1.146	2.42463	2.34175	2.63347	1.21778	-1.10012	-0.945504	1.13489	1.69294	0.962864	1.33472	2.18212	2.59305	2.53807	3.01023	2.57004	2.3904	2.32622	1.03191	2.20438	1.43026	2.24965	2.3866	2.48149	1.52446	1.56995	2.39176	2.48281	1.57192
1.147	2.42035	2.33738	2.6294	1.21237	-1.10775	-0.953008	1.12939	1.68796	0.95719	1.3294	2.17858	2.58981	2.53477	3.00733	2.56667	2.38701	2.32283	1.02623	2.19878	1.42392	2.2441	2.38119	2.47616	1.51821	1.56374	2.38634	2.47748	1.56572
1.148	2.41608	2.33302	2.62532	1.20695	-1.11538	-0.960512	1.12389	1.68299	0.951516	1.32407	2.17504	2.58656	2.53148	3.00444	2.5633	2.38361	2.31945	1.02054	2.19319	1.41759	2.23855	2.37577	2.47083	1.51196	1.55753	2.38093	2.47215	1.55951
1.149	2.41181	2.32865	2.62124	1.20154	-1.12301	-0.968016	1.11839	1.67801	0.945841	1.31874	2.17151	2.58331	2.52818	3.00153	2.55993	2.38022	2.31607	1.01486	2.1876	1.41125	2.233	2.37035	2.4655	1.50571	1.55133	2.37551	2.46682	1.55331
1.15	2.40754	2.32429	2.61716	1.19613	-1.13064	-0.97552	1.11289	1.67303	0.940167	1.31342	2.16797	2.58006	2.52488	2.99863	2.55656	2.37683	2.31268	1.00918	2.18201	1.40492	2.22745	2.36493	2.46017	1.49946	1.54512	2.37009	2.46149	1.5471
1.151	2.40327	2.31992	2.61308	1.19071	-1.13827	-0.983025	1.10739	1.66806	0.934493	1.30809	2.16443	2.57681	2.52159	2.99573	2.55319	2.37343	2.3093	1.0035	2.17641	1.39858	2.2219	2.35952	2.45484	1.49321	1.53892	2.36467	2.45616	1.54089
1.152	2.39899	2.31556	2.609	1.1853	-1.1459	-0.990529	1.10189	1.66308	0.928818	1.30276	2.16089	2.57356	2.51829	2.99283	2.54982	2.37004	2.30592	0.997824	2.17082	1.39224	2.21635	2.3541	2.44951	1.48697	1.53271	2.35926	2.45083	1.53469
1.153	2.39472	2.3112	2.60492	1.17989	-1.15353	-0.998033	1.09639	1.6581	0.923144	1.29744	2.15736	2.57031	2.51499	2.98993	2.54645	2.36665	2.30254	0.992143	2.16523	1.38591	2.2108	2.34868	2.44418	1.48072	1.52651	2.35384	2.4455	1.52848
1.154	2.39045	2.30683	2.60084	1.17447	-1.16116	-1.00554	1.09089	1.65312	0.91747	1.29211	2.15382	2.56706	2.5117	2.98703	2.54308	2.36325	2.29915	0.986463	2.15963	1.37957	2.20525	2.34326	2.43885	1.47447	1.5203	2.34842	2.44017	1.52228
1.155	2.38618	2.30247	2.59676	1.16906	-1.16879	-1.01304	1.08539	1.64815	0.911795	1.28679	2.15028	2.56381	2.5084	2.98413	2.53971	2.35986	2.29577	0.980783	2.15404	1.37323	2.1997	2.33785	2.43352	1.46822	1.51409	2.343	2.43484	1.51607
1.156	2.3819	2.2981	2.59268	1.16365	-1.17642	-1.02055	1.07989	1.64317	0.906121	1.28146	2.14674	2.56056	2.5051	2.98122	2.53634	2.35647	2.29239	0.975103	2.14845	1.3669	2.19415	2.33243	2.42819	1.46197	1.50789	2.33759	2.42952	1.50987
1.157	2.37763	2.29374	2.5886	1.15823	-1.18405	-1.02805	1.07439	1.63819	0.900447	1.27613	2.1432	2.55731	2.5018	2.97832	2.53296	2.35307	2.289	0.969422	2.14286	1.36056	2.18861	2.32701	2.42286	1.45572	1.50168	2.33217	2.42419	1.50366
1.158	2.37336	2.28937	2.58452	1.15282	-1.19168	-1.03555	1.06889	1.63322	0.894772	1.27081	2.13967	2.55406	2.49851	2.97542	2.52959	2.34968	2.28562	0.963742	2.13726	1.35422	2.18306	2.32159	2.41753	1.44947	1.49548	2.32675	2.41886	1.49745
1.159	2.36909	2.28501	2.58044	1.14741	-1.19931	-1.04306	1.06339	1.62824	0.889098	1.26548	2.13613	2.55081	2.49521	2.97252	2.52622	2.34629	2.28224	0.958062	2.13167	1.34789	2.17751	2.31618	2.4122	1.44322	1.48927	2.32133	2.41353	1.49125
1.16	2.36482	2.28065	2.57636	1.14199	-1.20694	-1.05056	1.05789	1.62326	0.883424	1.26015	2.13259	2.54757	2.49191	2.96961	2.52285	2.34289	2.27885	0.952381	2.12608	1.34155	2.17196	2.31076	2.40687	1.43697	1.48307	2.31592	2.4082	1.48504
1.161	2.36054	2.27628	2.57228	1.13658	-1.21457	-1.05807	1.05239	1.61828	0.877749	1.25483	2.12905	2.54432	2.48861	2.96671	2.51948	2.3395	2.27547	0.946701	2.12048	1.33521	2.16641	2.30534	2.40154	1.43072	1.47686	2.3105	2.40287	1.47884
1.162	2.35627	2.27192	2.5682	1.13117	-1.2222	-1.06557	1.04689	1.61331	0.872075	1.2495	2.12552	2.54107	2.48532	2.9638	2.51611	2.33611	2.27209	0.941021	2.11489	1.32888	2.16086	2.29992	2.39621	1.42447	1.47066	2.30508	2.39754	1.47263
1.163	2.352	2.26755	2.56412	1.12575	-1.22983	-1.07307	1.04139	1.60833	0.866401	1.24418	2.12198	2.53782	2.48202	2.9609	2.51274	2.33271	2.2687	0.935341	2.1093	1.32254	2.15531	2.29451	2.39088	1.41823	1.46445	2.29966	2.39221	1.46643
1.164	2.34773	2.26319	2.56004	1.12034	-1.23746	-1.08058	1.03589	1.60335	0.860726	1.23885	2.11844	2.53457	2.47872	2.95799	2.50936	2.32932	2.26532	0.92966	2.10371	1.3162	2.14976	2.28909	2.38555	1.41198	1.45824	2.29425	2.38688	1.46022
1.165	2.34345	2.25883	2.55596	1.11492	-1.24509	-1.08808	1.03039	1.59838	0.855052	1.23352	2.1149	2.53131	2.47542	2.95509	2.50599	2.32593	2.26194	0.92398	2.09811	1.30987	2.14421	2.28367	2.38022	1.40573	1.45204	2.28883	2.38155	1.45401
1.166	2.33918	2.25446	2.55189	1.10951	-1.25272	-1.09559	1.02489	1.5934	0.849378	1.2282	2.11137	2.52806	2.47212	2.95218	2.50262	2.32253	2.25855	0.9183	2.09252	1.30353	2.13866	2.27825	2.37489	1.39948	1.44583	2.28341	2.37622	1.44781
1.167	2.33491	2.2501	2.54781	1.1041	-1.26035	-1.10309	1.01938	1.58842	0.843703	1.22287	2.10783	2.52481	2.46883	2.94928	2.49925	2.31914	2.25517	0.91262	2.08693	1.29719	2.13312	2.27284	2.36956	1.39323	1.43963	2.27799	2.37089	1.4416
1.168	2.33064	2.24573	2.54373	1.09868	-1.26798	-1.1106	1.01388	1.58345	0.838029	1.21754	2.10429	2.52156	2.46553	2.94637	2.49588	2.31575	2.25179	0.906939	2.08133	1.29086	2.12757	2.26742	2.36423	1.38698	1.43342	2.27258	2.36556	1.4354
1.169	2.32637	2.24137	2.53965	1.09327	-1.27561	-1.1181	1.00838	1.57847	0.832355	1.21222	2.10075	2.51831	2.46223	2.94346	2.4925	2.31235	2.2484	0.901259	2.07574	1.28452	2.12202	2.262	2.3589	1.38073	1.42722	2.26716	2.36023	1.42919
1.17	2.32209	2.237	2.53557	1.08786	-1.28324	-1.1256	1.00288	1.57349	0.82668	1.20689	2.09721	2.51506	2.45893	2.94056	2.48913	2.30896	2.24502	0.895579	2.07015	1.27818	2.11647	2.25658	2.35357	1.37448	1.42101	2.26174	2.3549	1.42299
1.171	2.31782	2.23264	2.53149	1.08244	-1.29087	-1.13311	0.997383	1.56851	0.821006	1.20157	2.09368	2.51181	2.45563	2.93765	2.48576	2.30557	2.24164	0.889898	2.06456	1.27185	2.11092	2.25117	2.34824	1.36823	1.41481	2.25632	2.34957	1.41678
1.172	2.31355	2.22828	2.52741	1.07703	-1.2985	-1.14061	0.991882	1.56354	0.815331	1.19624	2.09014	2.50856	2.45233	2.93474	2.48239	2.30217	2.23825	0.884218	2.05896	1.26551	2.10537	2.24575	2.34291	1.36198	1.4086	2.25091	2.34424	1.41057
1.173	2.30928	2.22391	2.52333	1.07162	-1.30613	-1.14812	0.986382	1.55856	0.809657	1.19091	2.0866	2.50531	2.44904	2.93184	2.47901	2.29878	2.23487	0.878538	2.05337	1.25918	2.09982	2.24033	2.33758	1.35573	1.40239	2.24549	2.33891	1.40437
1.174	2.30501	2.21955	2.51925	1.0662	-1.31376	-1.15562	0.980881	1.55358	0.803983	1.18559	2.08306	2.50206	2.44574	2.92893	2.47564	2.29539	2.23149	0.872858	2.04778	1.25284	2.09427	2.23491	2.33225	1.34948	1.39619	2.24007	2.33358	1.39816
1.175	2.30073	2.21518	2.51517	1.06079	-1.32139	-1.16312	0.975381	1.54861	0.798308	1.18026	2.07952	2.49881	2.44244	2.92602	2.47227	2.29199	2.2281	0.867177	2.04218	1.2465	2.08872	2.2295	2.32692	1.34324	1.38998	2.23465	2.32825	1.39196
1.176	2.29646	2.21082	2.51109	1.05538	-1.32902	-1.17063	0.969881	1.54363	0.792634	1.17493	2.07599	2.49556	2.43914	2.92311	2.4689	2.2886	2.22472	0.861497	2.03659	1.24017	2.08317	2.22408	2.32159	1.33699	1.38378	2.22924	2.32292	1.38575
1.177	2.29219	2.20645	2.50701	1.04996	-1.33665	-1.17813	0.96438	1.53865	0.78696	1.16961	2.07245	2.49231	2.43584	2.9202	2.46552	2.2852	2.22133	0.855817	2.031	1.23383	2.07763	2.21866	2.31626	1.33074	1.37757	2.22382	2.31759	1.37955
1.178	2.28792	2.20209	2.50293	1.04455	-1.34428	-1.18564	0.95888	1.53367	0.781285	1.16428	2.06891	2.48905	2.43254	2.91729	2.46215	2.28181	2.21795	0.850136	2.02541	1.22749	2.07208	2.21324	2.31093	1.32449	1.37137	2.2184	2.31226	1.37334
1.179	2.28364	2.19773	2.49885	1.03914	-1.35191	-1.19314	0.953379	1.5287	0.775611	1.15895	2.06537	2.4858	2.42924	2.91438	2.45878	2.27842	2.21457	0.844456	2.01981	1.22116	2.06653	2.20783	2.3056	1.31824	1.36516	2.21298	2.30693	1.36713
1.18	2.27937	2.19336	2.49477	1.03372	-1.35954	-1.20065	0.947879	1.52372	0.769937	1.15363	2.06183	2.48255	2.42595	2.91147	2.45541	2.27502	2.21118	0.838776	2.01422	1.21482	2.06098	2.20241	2.30027	1.31199	1.35896	2.20757	2.3016	1.36093
1.181	2.2751	2.189	2.49069	1.02831	-1.36717	-1.20815	0.942378	1.51874	0.764262	1.1483	2.05829	2.4793	2.42265	2.90856	2.45203	2.27163	2.2078	0.833096	2.00863	1.20848	2.05543	2.19699	2.29494	1.30574	1.35275	2.20215	2.29627	1.35472
1.182	2.27083	2.18463	2.48661	1.0229	-1.3748	-1.21565	0.936878	1.51377	0.758588	1.14298	2.05476	2.47605	2.41935	2.90565	2.44866	2.26824	2.20442	0.827415	2.00303	1.20215	2.04988	2.19157	2.28961	1.29949	1.34654	2.19673	2.29094	1.34852
1.183	2.26656	2.18027	2.48253	1.01748	-1.38243	-1.22316	0.931377	1.50879	0.752914	1.13765	2.05122	2.4728	2.41605	2.90274	2.44529	2.26484	2.20103	0.821735	1.99744	1.19581	2.04433	2.18616	2.28428	1.29324	1.34034	2.19131	2.28561	1.34231
1.184	2.26228	2.17591	2.47845	1.01207	-1.39005	-1.23066	0.925877	1.50381	0.747239	1.13232	2.04768	2.46955	2.41275	2.89983	2.44191	2.26145	2.19765	0.816055	1.99185	1.18947	2.03878	2.18074	2.27895	1.28699	1.33413	2.1859	2.28028	1.3361
1.185	2.25801	2.17154	2.47438	1.00666	-1.39768	-1.23817	0.920377	1.49884	0.741565	1.127	2.04414	2.46629	2.40945	2.89692	2.43854	2.25806	2.19426	0.810374	1.98626	1.18314	2.03323	2.17532	2.27362	1.28074	1.32793	2.18048	2.27495	1.3299
1.186	2.25374	2.16718	2.4703	1.00124	-1.40531	-1.24567	0.914876	1.49386	0.735891	1.12167	2.0406	2.46304	2.40615	2.89401	2.43517	2.25466	2.19088	0.804694	1.98066	1.1768	2.02768	2.16991	2.26829	1.2745	1.32172	2.17506	2.26962	1.32369
1.187	2.24947	2.16281	2.46622	0.995828	-1.41294	-1.25317	0.909376	1.48888	0.730216	1.11634	2.03707	2.45979	2.40285	2.8911	2.43179	2.25127	2.1875	0.799014	1.97507	1.17046	2.02213	2.16449	2.26296	1.26825	1.31552	2.16964	2.26429	1.31749
1.188	2.24519	2.15845	2.46214	0.990415	-1.42057	-1.26068	0.903875	1.4839	0.724542	1.11102	2.03353	2.45654	2.39955	2.88819	2.42842	2.24787	2.18411	0.793334	1.96948	1.16413	2.01659	2.15907	2.25763	1.262	1.30931	2.16423	2.25896	1.31128
1.189	2.24092	2.15408	2.45806	0.985002	-1.4282	-1.26818	0.898375	1.47893	0.718868	1.10569	2.02999	2.45329	2.39625	2.88528	2.42505	2.24448	2.18073	0.787653	1.96388	1.15779	2.01104	2.15365	2.2523	1.25575	1.30311	2.15881	2.25364	1.30508
1.19	2.23665	2.14972	2.45398	0.979588	-1.43583	-1.27569	0.892874	1.47395	0.713193	1.10037	2.02645	2.45003	2.39295	2.88236	2.42167	2.24109	2.17734	0.781973	1.95829	1.15145	2.00549	2.14824	2.24697	1.2495	1.2969	2.15339	2.24831	1.29887
1.191	2.23238	2.14536	2.4499	0.974175	-1.44346	-1.28319	0.887374	1.46897	0.707519	1.09504	2.02291	2.44678	2.38965	2.87945	2.4183	2.23769	2.17396	0.776293	1.9527	1.14512	1.99994	2.14282	2.24165	1.24325	1.29069	2.14797	2.24298	1.29266
1.192	2.22811	2.14099	2.44582	0.968761	-1.45109	-1.2907	0.881873	1.464	0.701845	1.08971	2.01937	2.44353	2.38636	2.87654	2.41493	2.2343	2.17057	0.770613	1.9471	1.13878	1.99439	2.1374	2.23632	1.237	1.28449	2.14256	2.23765	1.28646
1.193	2.22383	2.13663	2.44174	0.963348	-1.45872	-1.2982	0.876373	1.45902	0.69617	1.08439	2.01584	2.44028	2.38306	2.87363	2.41155	2.23091	2.16719	0.764932	1.94151	1.13244	1.98884	2.13198	2.23099	1.23075	1.27828	2.13714	2.23232	1.28025
1.194	2.21956	2.13226	2.43766	0.957934	-1.46635	-1.3057	0.870873	1.45404	0.690496	1.07906	2.0123	2.43703	2.37976	2.87071	2.40818	2.22751	2.16381	0.759252	1.93592	1.12611	1.98329	2.12657	2.22566	1.2245	1.27208	2.13172	2.22699	1.27405
1.195	2.21529	2.1279	2.43358	0.952521	-1.47398	-1.31321	0.865372	1.44906	0.684822	1.07373	2.00876	2.43377	2.37646	2.8678	2.4048	2.22412	2.16042	0.753572	1.93033	1.11977	1.97774	2.12115	2.22033	1.21825	1.26587	2.1263	2.22166	1.26784
1.196	2.21102	2.12354	2.4295	0.947107	-1.48161	-1.32071	0.859872	1.44409	0.679147	1.06841	2.00522	2.43052	2.37316	2.86488	2.40143	2.22072	2.15704	0.747891	1.92473	1.11344	1.97219	2.11573	2.215	1.212	1.25967	2.12089	2.21633	1.26164
1.197	2.20674	2.11917	2.42542	0.941694	-1.48924	-1.32822	0.854371	1.43911	0.673473	1.06308	2.00168	2.42727	2.36986	2.86197	2.39806	2.21733	2.15365	0.742211	1.91914	1.1071	1.96664	2.11031	2.20967	1.20576	1.25346	2.11547	2.211	1.25543
1.198	2.20247	2.11481	2.42134	0.93628	-1.49687	-1.33572	0.848871	1.43413	0.667799	1.05776	1.99814	2.42402	2.36656	2.85906	2.39468	2.21394	2.15027	0.736531	1.91355	1.10076	1.9611	2.1049	2.20434	1.19951	1.24725	2.11005	2.20567	1.24922
1.199	2.1982	2.11044	2.41726	0.930867	-1.5045	-1.34323	0.84337	1.42916	0.662124	1.05243	1.9946	2.42076	2.36326	2.85614	2.39131	2.21054	2.14688	0.730851	1.90795	1.09443	1.95555	2.09948	2.19901	1.19326	1.24105	2.10463	2.20034	1.24302
1.2	2.19393	2.10608	2.41318	0.925453	-1.51213	-1.35073	0.83787	1.42418	0.65645	1.0471	1.99107	2.41751	2.35996	2.85323	2.38794	2.20715	2.1435	0.72517	1.90236	1.08809	1.95	2.09406	2.19368	1.18701	1.23484	2.09922	2.19501	1.23681
1.201	2.18966	2.10171	2.4091	0.92004	-1.51976	-1.35823	0.832369	1.4192	0.650776	1.04178	1.98753	2.41426	2.35666	2.85031	2.38456	2.20376	2.14012	0.71949	1.89677	1.08175	1.94445	2.08864	2.18835	1.18076	1.22864	2.0938	2.18968	1.23061
1.202	2.18538	2.09735	2.40502	0.914627	-1.52739	-1.36574	0.826869	1.41423	0.645101	1.03645	1.98399	2.411	2.35336	2.8474	2.38119	2.20036	2.13673	0.71381	1.89118	1.07542	1.9389	2.08323	2.18302	1.17451	1.22243	2.08838	2.18435	1.2244
1.203	2.18111	2.09299	2.40094	0.909213	-1.53502	-1.37324	0.821368	1.40925	0.639427	1.03112	1.98045	2.40775	2.35006	2.84448	2.37781	2.19697	2.13335	0.708129	1.88558	1.06908	1.93335	2.07781	2.17769	1.16826	1.21623	2.08296	2.17902	1.2182
1.204	2.17684	2.08862	2.39687	0.9038	-1.54265	-1.38075	0.815868	1.40427	0.633753	1.0258	1.97691	2.4045	2.34676	2.84157	2.37444	2.19357	2.12996	0.702449	1.87999	1.06274	1.9278	2.07239	2.17236	1.16201	1.21002	2.07755	2.17369	1.21199
1.205	2.17257	2.08426	2.39279	0.898386	-1.55028	-1.38825	0.810368	1.39929	0.628078	1.02047	1.97337	2.40125	2.34346	2.83865	2.37106	2.19018	2.12658	0.696769	1.8744	1.05641	1.92225	2.06697	2.16703	1.15576	1.20382	2.07213	2.16836	1.20578
1.206	2.16829	2.07989	2.38871	0.892973	-1.55791	-1.39575	0.804867	1.39432	0.622404	1.01514	1.96983	2.39799	2.34016	2.83573	2.36769	2.18679	2.12319	0.691089	1.8688	1.05007	1.9167	2.06156	2.1617	1.14951	1.19761	2.06671	2.16303	1.19958
1.207	2.16402	2.07553	2.38463	0.887559	-1.56554	-1.40326	0.799367	1.38934	0.616729	1.00982	1.9663	2.39474	2.33686	2.83282	2.36432	2.18339	2.11981	0.685408	1.86321	1.04373	1.91115	2.05614	2.15637	1.14326	1.1914	2.06129	2.1577	1.19337
1.208	2.15975	2.07116	2.38055	0.882146	-1.57317	-1.41076	0.793866	1.38436	0.611055	1.00449	1.96276	2.39149	2.33356	2.8299	2.36094	2.18	2.11642	0.679728	1.85762	1.0374	1.90561	2.05072	2.15104	1.13702	1.1852	2.05588	2.15237	1.18717
1.209	2.15548	2.0668	2.37647	0.876732	-1.5808	-1.41827	0.788366	1.37939	0.605381	0.999166	1.95922	2.38823	2.33026	2.82698	2.35757	2.1766	2.11304	0.674048	1.85203	1.03106	1.90006	2.0453	2.14571	1.13077	1.17899	2.05046	2.14704	1.18096
1.21	2.15121	2.06244	2.37239	0.871319	-1.58843	-1.42577	0.782865	1.37441	0.599706	0.99384	1.95568	2.38498	2.32696	2.82407	2.35419	2.17321	2.10965	0.668367	1.84643	1.02472	1.89451	2.03989	2.14038	1.12452	1.17279	2.04504	2.14171	1.17476
1.211	2.14693	2.05807	2.36831	0.865905	-1.59606	-1.43328	0.777365	1.36943	0.594032	0.988513	1.95214	2.38173	2.32366	2.82115	2.35082	2.16982	2.10627	0.662687	1.84084	1.01839	1.88896	2.03447	2.13505	1.11827	1.16658	2.03962	2.13638	1.16855
1.212	2.14266	2.05371	2.36423	0.860492	-1.60369	-1.44078	0.771864	1.36445	0.588358	0.983187	1.9486	2.37847	2.32036	2.81823	2.34744	2.16642	2.10288	0.657007	1.83525	1.01205	1.88341	2.02905	2.12972	1.11202	1.16038	2.03421	2.13105	1.16234
1.213	2.13839	2.04934	2.36015	0.855078	-1.61132	-1.44828	0.766364	1.35948	0.582683	0.977861	1.94506	2.37522	2.31705	2.81531	2.34407	2.16303	2.0995	0.651327	1.82965	1.00571	1.87786	2.02363	2.12439	1.10577	1.15417	2.02879	2.12572	1.15614
1.214	2.13412	2.04498	2.35607	0.849665	-1.61895	-1.45579	0.760864	1.3545	0.577009	0.972534	1.94152	2.37197	2.31375	2.8124	2.34069	2.15963	2.09612	0.645646	1.82406	0.999378	1.87231	2.01822	2.11906	1.09952	1.14797	2.02337	2.12039	1.14993
1.215	2.12985	2.04062	2.35199	0.844252	-1.62658	-1.46329	0.755363	1.34952	0.571335	0.967208	1.93799	2.36871	2.31045	2.80948	2.33732	2.15624	2.09273	0.639966	1.81847	0.993041	1.86676	2.0128	2.11373	1.09327	1.14176	2.01795	2.11506	1.14373
1.216	2.12557	2.03625	2.34791	0.838838	-1.63421	-1.4708	0.749863	1.34455	0.56566	0.961882	1.93445	2.36546	2.30715	2.80656	2.33394	2.15285	2.08935	0.634286	1.81288	0.986705	1.86121	2.00738	2.1084	1.08702	1.13555	2.01254	2.10973	1.13752
1.217	2.1213	2.03189	2.34383	0.833425	-1.64184	-1.4783	0.744362	1.33957	0.559986	0.956556	1.93091	2.3622	2.30385	2.80364	2.33057	2.14945	2.08596	0.628606	1.80728	0.980368	1.85566	2.00196	2.10307	1.08077	1.12935	2.00712	2.1044	1.13132
1.218	2.11703	2.02752	2.33975	0.828011	-1.64947	-1.4858	0.738862	1.33459	0.554312	0.951229	1.92737	2.35895	2.30055	2.80072	2.32719	2.14606	2.08258	0.622925	1.80169	0.974032	1.85011	1.99655	2.09774	1.07452	1.12314	2.0017	2.09907	1.12511
1.219	2.11276	2.02316	2.33567	0.822598	-1.6571	-1.49331	0.733361	1.32962	0.548637	0.945903	1.92383	2.3557	2.29725	2.7978	2.32382	2.14266	2.07919	0.617245	1.7961	0.967695	1.84457	1.99113	2.09241	1.06828	1.11694	1.99628	2.09374	1.1189
1.22	2.10848	2.01879	2.33159	0.817184	-1.66473	-1.50081	0.727861	1.32464	0.542963	0.940577	1.92029	2.35244	2.29395	2.79488	2.32044	2.13927	2.07581	0.611565	1.7905	0.961359	1.83902	1.98571	2.08708	1.06203	1.11073	1.99087	2.08841	1.1127
1.221	2.10421	2.01443	2.32751	0.811771	-1.67236	-1.50832	0.72236	1.31966	0.537289	0.93525	1.91675	2.34919	2.29065	2.79197	2.31707	2.13588	2.07242	0.605884	1.78491	0.955022	1.83347	1.98029	2.08175	1.05578	1.10453	1.98545	2.08308	1.10649
1.222	2.09994	2.01007	2.32343	0.806357	-1.67999	-1.51582	0.71686	1.31468	0.531614	0.929924	1.91321	2.34594	2.28735	2.78905	2.31369	2.13248	2.06904	0.600204	1.77932	0.948686	1.82792	1.97488	2.07642	1.04953	1.09832	1.98003	2.07775	1.10029
1.223	2.09567	2.0057	2.31935	0.800944	-1.68762	-1.52333	0.71136	1.30971	0.52594	0.924598	1.90968	2.34268	2.28405	2.78613	2.31032	2.12909	2.06565	0.594524	1.77373	0.942349	1.82237	1.96946	2.07109	1.04328	1.09212	1.97461	2.07243	1.09408
1.224	2.0914	2.00134	2.31528	0.79553	-1.69525	-1.53083	0.705859	1.30473	0.520266	0.919272	1.90614	2.33943	2.28075	2.78321	2.30694	2.12569	2.06227	0.588844	1.76813	0.936013	1.81682	1.96404	2.06576	1.03703	1.08591	1.9692	2.0671	1.08788
1.225	2.08712	1.99697	2.3112	0.790117	-1.70288	-1.53833	0.700359	1.29975	0.514591	0.913945	1.9026	2.33617	2.27745	2.78029	2.30357	2.1223	2.05888	0.583163	1.76254	0.929676	1.81127	1.95862	2.06043	1.03078	1.0797	1.96378	2.06177	1.08167
1.226	2.08285	1.99261	2.30712	0.784703	-1.71051	-1.54584	0.694858	1.29478	0.508917	0.908619	1.89906	2.33292	2.27414	2.77737	2.30019	2.11891	2.0555	0.577483	1.75695	0.92334	1.80572	1.95321	2.0551	1.02453	1.0735	1.95836	2.05644	1.07546
1.227	2.07858	1.98824	2.30304	0.77929	-1.71814	-1.55334	0.689358	1.2898	0.503243	0.903293	1.89552	2.32966	2.27084	2.77444	2.29682	2.11551	2.05211	0.571803	1.75135	0.917003	1.80017	1.94779	2.04977	1.01828	1.06729	1.95294	2.05111	1.06926
1.228	2.07431	1.98388	2.29896	0.773877	-1.72577	-1.56085	0.683857	1.28482	0.497568	0.897966	1.89198	2.32641	2.26754	2.77152	2.29344	2.11212	2.04873	0.566122	1.74576	0.910667	1.79462	1.94237	2.04444	1.01203	1.06109	1.94753	2.04578	1.06305
1.229	2.07003	1.97952	2.29488	0.768463	-1.7334	-1.56835	0.678357	1.27984	0.491894	0.89264	1.88844	2.32316	2.26424	2.7686	2.29007	2.10872	2.04534	0.560442	1.74017	0.90433	1.78908	1.93695	2.03911	1.00578	1.05488	1.94211	2.04045	1.05685
1.23	2.06576	1.97515	2.2908	0.76305	-1.74103	-1.57585	0.672856	1.27487	0.48622	0.887314	1.8849	2.3199	2.26094	2.76568	2.28669	2.10533	2.04196	0.554762	1.73458	0.897994	1.78353	1.93154	2.03378	0.999535	1.04868	1.93669	2.03512	1.05064
1.231	2.06149	1.97079	2.28672	0.757636	-1.74866	-1.58336	0.667356	1.26989	0.480545	0.881987	1.88136	2.31665	2.25764	2.76276	2.28332	2.10194	2.03857	0.549082	1.72898	0.891657	1.77798	1.92612	2.02845	0.993286	1.04247	1.93127	2.02979	1.04444
1.232	2.05722	1.96642	2.28264	0.752223	-1.75629	-1.59086	0.661856	1.26491	0.474871	0.876661	1.87782	2.31339	2.25434	2.75984	2.27994	2.09854	2.03519	0.543401	1.72339	0.885321	1.77243	1.9207	2.02312	0.987037	1.03627	1.92586	2.02446	1.03823
1.233	2.05295	1.96206	2.27856	0.746809	-1.76392	-1.59837	0.656355	1.25994	0.469197	0.871335	1.87429	2.31014	2.25104	2.75692	2.27657	2.09515	2.0318	0.537721	1.7178	0.878984	1.76688	1.91528	2.01779	0.980788	1.03006	1.92044	2.01913	1.03202
1.234	2.04867	1.9577	2.27448	0.741396	-1.77155	-1.60587	0.650855	1.25496	0.463522	0.866009	1.87075	2.30688	2.24773	2.75399	2.27319	2.09175	2.02841	0.532041	1.7122	0.872648	1.76133	1.90987	2.01246	0.974539	1.02385	1.91502	2.0138	1.02582
1.235	2.0444	1.95333	2.2704	0.735982	-1.77918	-1.61338	0.645354	1.24998	0.457848	0.860682	1.86721	2.30363	2.24443	2.75107	2.26981	2.08836	2.02503	0.52636	1.70661	0.866311	1.75578	1.90445	2.00713	0.968289	1.01765	1.9096	2.00847	1.01961
1.236	2.04013	1.94897	2.26632	0.730569	-1.78681	-1.62088	0.639854	1.24501	0.452174	0.855356	1.86367	2.30037	2.24113	2.74815	2.26644	2.08496	2.02164	0.52068	1.70102	0.859974	1.75023	1.89903	2.00181	0.96204	1.01144	1.90419	2.00314	1.01341
1.237	2.03586	1.9446	2.26224	0.725155	-1.79444	-1.62838	0.634353	1.24003	0.446499	0.85003	1.86013	2.29712	2.23783	2.74523	2.26306	2.08157	2.01826	0.515	1.69543	0.853638	1.74468	1.89361	1.99648	0.955791	1.00524	1.89877	1.99781	1.0072
1.238	2.03158	1.94024	2.25816	0.719742	-1.80207	-1.63589	0.628853	1.23505	0.440825	0.844703	1.85659	2.29386	2.23453	2.7423	2.25969	2.07818	2.01487	0.50932	1.68983	0.847301	1.73913	1.8882	1.99115	0.949542	0.999032	1.89335	1.99248	1.00099
1.239	2.02731	1.93587	2.25408	0.714328	-1.8097	-1.64339	0.623352	1.23007	0.435151	0.839377	1.85305	2.29061	2.23123	2.73938	2.25631	2.07478	2.01149	0.503639	1.68424	0.840965	1.73359	1.88278	1.98582	0.943293	0.992826	1.88793	1.98715	0.994789
1.24	2.02304	1.93151	2.25	0.708915	-1.81733	-1.6509	0.617852	1.2251	0.429476	0.834051	1.84951	2.28735	2.22793	2.73646	2.25294	2.07139	2.0081	0.497959	1.67865	0.834628	1.72804	1.87736	1.98049	0.937044	0.986621	1.88252	1.98182	0.988583
1.241	2.01877	1.92715	2.24592	0.703502	-1.82496	-1.6584	0.612352	1.22012	0.423802	0.828724	1.84597	2.2841	2.22462	2.73354	2.24956	2.06799	2.00472	0.492279	1.67305	0.828292	1.72249	1.87194	1.97516	0.930795	0.980415	1.8771	1.97649	0.982378
1.242	2.0145	1.92278	2.24184	0.698088	-1.83259	-1.6659	0.606851	1.21514	0.418127	0.823398	1.84243	2.28084	2.22132	2.73061	2.24618	2.0646	2.00133	0.486599	1.66746	0.821955	1.71694	1.86653	1.96983	0.924546	0.974209	1.87168	1.97116	0.976172
1.243	2.01022	1.91842	2.23777	0.692675	-1.84022	-1.67341	0.601351	1.21017	0.412453	0.818072	1.8389	2.27759	2.21802	2.72769	2.24281	2.06121	1.99795	0.480918	1.66187	0.815619	1.71139	1.86111	1.9645	0.918297	0.968004	1.86626	1.96583	0.969966
1.244	2.00595	1.91405	2.23369	0.687261	-1.84785	-1.68091	0.59585	1.20519	0.406779	0.812746	1.83536	2.27433	2.21472	2.72476	2.23943	2.05781	1.99456	0.475238	1.65628	0.809282	1.70584	1.85569	1.95917	0.912048	0.961798	1.86085	1.9605	0.96376
1.245	2.00168	1.90969	2.22961	0.681848	-1.85548	-1.68842	0.59035	1.20021	0.401104	0.807419	1.83182	2.27108	2.21142	2.72184	2.23606	2.05442	1.99118	0.469558	1.65068	0.802946	1.70029	1.85027	1.95384	0.905798	0.955593	1.85543	1.95517	0.957555
1.246	1.99741	1.90533	2.22553	0.676434	-1.86311	-1.69592	0.584849	1.19523	0.39543	0.802093	1.82828	2.26782	2.20812	2.71892	2.23268	2.05102	1.98779	0.463877	1.64509	0.796609	1.69474	1.84486	1.94851	0.899549	0.949387	1.85001	1.94984	0.951349
1.247	1.99314	1.90096	2.22145	0.671021	-1.87074	-1.70343	0.579349	1.19026	0.389756	0.796767	1.82474	2.26457	2.20481	2.71599	2.2293	2.04763	1.98441	0.458197	1.6395	0.790273	1.68919	1.83944	1.94318	0.8933	0.943182	1.84459	1.94451	0.945143
1.248	1.98886	1.8966	2.21737	0.665607	-1.87836	-1.71093	0.573848	1.18528	0.384081	0.79144	1.8212	2.26131	2.20151	2.71307	2.22593	2.04423	1.98102	0.452517	1.6339	0.783936	1.68364	1.83402	1.93785	0.887051	0.936976	1.83918	1.93918	0.938937
1.249	1.98459	1.89223	2.21329	0.660194	-1.88599	-1.71843	0.568348	1.1803	0.378407	0.786114	1.81766	2.25806	2.19821	2.71014	2.22255	2.04084	1.97763	0.446837	1.62831	0.7776	1.67809	1.8286	1.93252	0.880802	0.93077	1.83376	1.93385	0.932732
1.25	1.98032	1.88787	2.20921	0.65478	-1.89362	-1.72594	0.562848	1.17533	0.372733	0.780788	1.81412	2.2548	2.19491	2.70722	2.21917	2.03745	1.97425	0.441156	1.62272	0.771263	1.67255	1.82319	1.92719	0.874553	0.924565	1.82834	1.92852	0.926526
1.251	1.97605	1.8835	2.20513	0.649367	-1.90125	-1.73344	0.557347	1.17035	0.367058	0.775462	1.81058	2.25155	2.19161	2.70429	2.2158	2.03405	1.97086	0.435476	1.61713	0.764927	1.667	1.81777	1.92186	0.868304	0.918359	1.82292	1.92319	0.92032
1.252	1.97177	1.87914	2.20105	0.643953	-1.90888	-1.74095	0.551847	1.16537	0.361384	0.770135	1.80704	2.24829	2.1883	2.70137	2.21242	2.03066	1.96748	0.429796	1.61153	0.75859	1.66145	1.81235	1.91653	0.862055	0.912154	1.81751	1.91786	0.914114
1.253	1.9675	1.87478	2.19697	0.63854	-1.91651	-1.74845	0.546346	1.1604	0.35571	0.764809	1.8035	2.24504	2.185	2.69844	2.20905	2.02726	1.96409	0.424115	1.60594	0.752254	1.6559	1.80693	1.9112	0.855806	0.905948	1.81209	1.91253	0.907909
1.254	1.96323	1.87041	2.19289	0.633127	-1.92414	-1.75596	0.540846	1.15542	0.350035	0.759483	1.79996	2.24178	2.1817	2.69552	2.20567	2.02387	1.96071	0.418435	1.60035	0.745917	1.65035	1.80152	1.90587	0.849556	0.899742	1.80667	1.9072	0.901703
1.255	1.95896	1.86605	2.18881	0.627713	-1.93177	-1.76346	0.535345	1.15044	0.344361	0.754156	1.79642	2.23853	2.1784	2.69259	2.20229	2.02048	1.95732	0.412755	1.59475	0.739581	1.6448	1.7961	1.90054	0.843307	0.893537	1.80125	1.90187	0.895497
1.256	1.95469	1.86168	2.18473	0.6223	-1.9394	-1.77096	0.529845	1.14546	0.338687	0.74883	1.79289	2.23527	2.1751	2.68966	2.19892	2.01708	1.95393	0.407075	1.58916	0.733244	1.63925	1.79068	1.89521	0.837058	0.887331	1.79584	1.89654	0.889291
1.257	1.95041	1.85732	2.18065	0.616886	-1.94703	-1.77847	0.524344	1.14049	0.333012	0.743504	1.78935	2.23201	2.17179	2.68674	2.19554	2.01369	1.95055	0.401394	1.58357	0.726908	1.6337	1.78526	1.88988	0.830809	0.881126	1.79042	1.89122	0.883086
1.258	1.94614	1.85295	2.17657	0.611473	-1.95466	-1.78597	0.518844	1.13551	0.327338	0.738177	1.78581	2.22876	2.16849	2.68381	2.19216	2.01029	1.94716	0.395714	1.57798	0.720571	1.62815	1.77985	1.88455	0.82456	0.87492	1.785	1.88589	0.87688
1.259	1.94187	1.84859	2.17249	0.606059	-1.96229	-1.79348	0.513343	1.13053	0.321664	0.732851	1.78227	2.2255	2.16519	2.68089	2.18879	2.0069	1.94378	0.390034	1.57238	0.714234	1.6226	1.77443	1.87922	0.818311	0.868715	1.77958	1.88056	0.870674
1.26	1.9376	1.84423	2.16841	0.600646	-1.96992	-1.80098	0.507843	1.12556	0.315989	0.727525	1.77873	2.22225	2.16189	2.67796	2.18541	2.0035	1.94039	0.384353	1.56679	0.707898	1.61706	1.76901	1.87389	0.812062	0.862509	1.77417	1.87523	0.864469
1.261	1.93332	1.83986	2.16433	0.595232	-1.97755	-1.80848	0.502343	1.12058	0.310315	0.722199	1.77519	2.21899	2.15858	2.67503	2.18203	2.00011	1.93701	0.378673	1.5612	0.701561	1.61151	1.76359	1.86856	0.805813	0.856303	1.76875	1.8699	0.858263
1.262	1.92905	1.8355	2.16026	0.589819	-1.98518	-1.81599	0.496842	1.1156	0.304641	0.716872	1.77165	2.21574	2.15528	2.67211	2.17866	1.99671	1.93362	0.372993	1.5556	0.695225	1.60596	1.75818	1.86323	0.799564	0.850098	1.76333	1.86457	0.852057
1.263	1.92478	1.83113	2.15618	0.584405	-1.99281	-1.82349	0.491342	1.11062	0.298966	0.711546	1.76811	2.21248	2.15198	2.66918	2.17528	1.99332	1.93023	0.367313	1.55001	0.688888	1.60041	1.75276	1.8579	0.793315	0.843892	1.75791	1.85924	0.845851
1.264	1.92051	1.82677	2.1521	0.578992	-2.00044	-1.831	0.485841	1.10565	0.293292	0.70622	1.76457	2.20922	2.14868	2.66625	2.1719	1.98993	1.92685	0.361632	1.54442	0.682552	1.59486	1.74734	1.85257	0.787065	0.837687	1.7525	1.85391	0.839646
1.265	1.91624	1.82241	2.14802	0.573578	-2.00807	-1.8385	0.480341	1.10067	0.287618	0.700893	1.76103	2.20597	2.14537	2.66332	2.16853	1.98653	1.92346	0.355952	1.53883	0.676215	1.58931	1.74192	1.84724	0.780816	0.831481	1.74708	1.84858	0.83344
1.266	1.91196	1.81804	2.14394	0.568165	-2.0157	-1.84601	0.47484	1.09569	0.281943	0.695567	1.75749	2.20271	2.14207	2.6604	2.16515	1.98314	1.92008	0.350272	1.53323	0.669879	1.58376	1.73651	1.84191	0.774567	0.825275	1.74166	1.84325	0.827234
1.267	1.90769	1.81368	2.13986	0.562751	-2.02333	-1.85351	0.46934	1.09072	0.276269	0.690241	1.75395	2.19946	2.13877	2.65747	2.16177	1.97974	1.91669	0.344592	1.52764	0.663542	1.57821	1.73109	1.83658	0.768318	0.81907	1.73624	1.83792	0.821028
1.268	1.90342	1.80931	2.13578	0.557338	-2.03096	-1.86101	0.463839	1.08574	0.270595	0.684914	1.75041	2.1962	2.13547	2.65454	2.1584	1.97635	1.91331	0.338911	1.52205	0.657206	1.57266	1.72567	1.83125	0.762069	0.812864	1.73083	1.83259	0.814823
1.269	1.89915	1.80495	2.1317	0.551925	-2.03859	-1.86852	0.458339	1.08076	0.26492	0.679588	1.74687	2.19294	2.13217	2.65161	2.15502	1.97295	1.90992	0.333231	1.51645	0.650869	1.56711	1.72025	1.82592	0.75582	0.806659	1.72541	1.82726	0.808617
1.27	1.89487	1.80058	2.12762	0.546511	-2.04622	-1.87602	0.452839	1.07579	0.259246	0.674262	1.74333	2.18969	2.12886	2.64868	2.15164	1.96956	1.90653	0.327551	1.51086	0.644533	1.56157	1.71484	1.82059	0.749571	0.800453	1.71999	1.82193	0.802411
1.271	1.8906	1.79622	2.12354	0.541098	-2.05385	-1.88353	0.447338	1.07081	0.253572	0.668936	1.73979	2.18643	2.12556	2.64576	2.14827	1.96617	1.90315	0.32187	1.50527	0.638196	1.55602	1.70942	1.81526	0.743322	0.794248	1.71457	1.8166	0.796205
1.272	1.88633	1.79186	2.11946	0.535684	-2.06148	-1.89103	0.441838	1.06583	0.247897	0.663609	1.73625	2.18318	2.12226	2.64283	2.14489	1.96277	1.89976	0.31619	1.49968	0.63186	1.55047	1.704	1.80993	0.737073	0.788042	1.70916	1.81127	0.79
1.273	1.88206	1.78749	2.11538	0.530271	-2.06911	-1.89853	0.436337	1.06085	0.242223	0.658283	1.73272	2.17992	2.11895	2.6399	2.14151	1.95938	1.89638	0.31051	1.49408	0.625523	1.54492	1.69858	1.8046	0.730823	0.781836	1.70374	1.80594	0.783794
1.274	1.87779	1.78313	2.1113	0.524857	-2.07674	-1.90604	0.430837	1.05588	0.236548	0.652957	1.72918	2.17666	2.11565	2.63697	2.13813	1.95598	1.89299	0.30483	1.48849	0.619187	1.53937	1.69317	1.79927	0.724574	0.775631	1.69832	1.80061	0.777588
1.275	1.87351	1.77876	2.10722	0.519444	-2.08437	-1.91354	0.425336	1.0509	0.230874	0.64763	1.72564	2.17341	2.11235	2.63404	2.13476	1.95259	1.8896	0.299149	1.4829	0.61285	1.53382	1.68775	1.79394	0.718325	0.769425	1.6929	1.79528	0.771382
1.276	1.86924	1.7744	2.10314	0.51403	-2.092	-1.92105	0.419836	1.04592	0.2252	0.642304	1.7221	2.17015	2.10905	2.63111	2.13138	1.94919	1.88622	0.293469	1.4773	0.606514	1.52827	1.68233	1.78861	0.712076	0.76322	1.68749	1.78995	0.765177
1.277	1.86497	1.77003	2.09906	0.508617	-2.09963	-1.92855	0.414335	1.04095	0.219525	0.636978	1.71856	2.16689	2.10574	2.62818	2.128	1.9458	1.88283	0.287789	1.47171	0.600177	1.52272	1.67691	1.78328	0.705827	0.757014	1.68207	1.78462	0.758971
1.278	1.8607	1.76567	2.09498	0.503203	-2.10726	-1.93606	0.408835	1.03597	0.213851	0.631652	1.71502	2.16364	2.10244	2.62525	2.12463	1.94241	1.87945	0.282108	1.46612	0.593841	1.51717	1.6715	1.77795	0.699578	0.750809	1.67665	1.77929	0.752765
1.279	1.85643	1.76131	2.0909	0.49779	-2.11489	-1.94356	0.403335	1.03099	0.208177	0.626325	1.71148	2.16038	2.09914	2.62233	2.12125	1.93901	1.87606	0.276428	1.46053	0.587504	1.51162	1.66608	1.77262	0.693329	0.744603	1.67123	1.77396	0.746559
1.28	1.85215	1.75694	2.08682	0.492376	-2.12252	-1.95106	0.397834	1.02601	0.202502	0.620999	1.70794	2.15713	2.09584	2.6194	2.11787	1.93562	1.87267	0.270748	1.45493	0.581168	1.50607	1.66066	1.76729	0.68708	0.738397	1.66582	1.76863	0.740354
1.281	1.84788	1.75258	2.08275	0.486963	-2.13015	-1.95857	0.392334	1.02104	0.196828	0.615673	1.7044	2.15387	2.09253	2.61647	2.1145	1.93222	1.86929	0.265068	1.44934	0.574831	1.50053	1.65524	1.76196	0.680831	0.732192	1.6604	1.7633	0.734148
1.282	1.84361	1.74821	2.07867	0.48155	-2.13778	-1.96607	0.386833	1.01606	0.191154	0.610346	1.70086	2.15061	2.08923	2.61354	2.11112	1.92883	1.8659	0.259387	1.44375	0.568494	1.49498	1.64983	1.75664	0.674582	0.725986	1.65498	1.75797	0.727942
1.283	1.83934	1.74385	2.07459	0.476136	-2.14541	-1.97358	0.381333	1.01108	0.185479	0.60502	1.69732	2.14736	2.08593	2.61061	2.10774	1.92543	1.86252	0.253707	1.43815	0.562158	1.48943	1.64441	1.75131	0.668332	0.719781	1.64956	1.75264	0.721736
1.284	1.83506	1.73949	2.07051	0.470723	-2.15304	-1.98108	0.375832	1.00611	0.179805	0.599694	1.69378	2.1441	2.08262	2.60768	2.10436	1.92204	1.85913	0.248027	1.43256	0.555821	1.48388	1.63899	1.74598	0.662083	0.713575	1.64415	1.74731	0.715531
1.285	1.83079	1.73512	2.06643	0.465309	-2.16067	-1.98858	0.370332	1.00113	0.174131	0.594367	1.69024	2.14084	2.07932	2.60475	2.10099	1.91864	1.85574	0.242346	1.42697	0.549485	1.47833	1.63357	1.74065	0.655834	0.707369	1.63873	1.74198	0.709325
1.286	1.82652	1.73076	2.06235	0.459896	-2.1683	-1.99609	0.364831	0.996153	0.168456	0.589041	1.6867	2.13759	2.07602	2.60182	2.09761	1.91525	1.85236	0.236666	1.42138	0.543148	1.47278	1.62816	1.73532	0.649585	0.701164	1.63331	1.73665	0.703119
1.287	1.82225	1.72639	2.05827	0.454482	-2.17593	-2.00359	0.359331	0.991175	0.162782	0.583715	1.68316	2.13433	2.07271	2.59889	2.09423	1.91186	1.84897	0.230986	1.41578	0.536812	1.46723	1.62274	1.72999	0.643336	0.694958	1.62789	1.73132	0.696914
1.288	1.81798	1.72203	2.05419	0.449069	-2.18356	-2.0111	0.353831	0.986198	0.157108	0.578389	1.67962	2.13107	2.06941	2.59595	2.09085	1.90846	1.84559	0.225306	1.41019	0.530475	1.46168	1.61732	1.72466	0.637087	0.688753	1.62248	1.72599	0.690708
1.289	1.8137	1.71766	2.05011	0.443655	-2.19119	-2.0186	0.34833	0.981221	0.151433	0.573062	1.67608	2.12782	2.06611	2.59302	2.08748	1.90507	1.8422	0.219625	1.4046	0.524139	1.45613	1.6119	1.71933	0.630838	0.682547	1.61706	1.72066	0.684502
1.29	1.80943	1.7133	2.04603	0.438242	-2.19882	-2.02611	0.34283	0.976244	0.145759	0.567736	1.67254	2.12456	2.06281	2.59009	2.0841	1.90167	1.83881	0.213945	1.399	0.517802	1.45058	1.60649	1.714	0.624589	0.676342	1.61164	1.71534	0.678296
1.291	1.80516	1.70894	2.04195	0.432828	-2.20645	-2.03361	0.337329	0.971267	0.140085	0.56241	1.669	2.1213	2.0595	2.58716	2.08072	1.89828	1.83543	0.208265	1.39341	0.511466	1.44504	1.60107	1.70867	0.61834	0.670136	1.60622	1.71001	0.672091
1.292	1.80089	1.70457	2.03787	0.427415	-2.21408	-2.04111	0.331829	0.96629	0.13441	0.557083	1.66546	2.11804	2.0562	2.58423	2.07734	1.89488	1.83204	0.202585	1.38782	0.505129	1.43949	1.59565	1.70334	0.61209	0.66393	1.60081	1.70468	0.665885
1.293	1.79661	1.70021	2.03379	0.422001	-2.22171	-2.04862	0.326328	0.961313	0.128736	0.551757	1.66192	2.11479	2.0529	2.5813	2.07397	1.89149	1.82865	0.196904	1.38223	0.498793	1.43394	1.59023	1.69801	0.605841	0.657725	1.59539	1.69935	0.659679
1.294	1.79234	1.69584	2.02971	0.416588	-2.22934	-2.05612	0.320828	0.956336	0.123062	0.546431	1.65838	2.11153	2.04959	2.57837	2.07059	1.88809	1.82527	0.191224	1.37663	0.492456	1.42839	1.58482	1.69268	0.599592	0.651519	1.58997	1.69402	0.653473
1.295	1.78807	1.69148	2.02563	0.411175	-2.23697	-2.06363	0.315327	0.951359	0.117387	0.541104	1.65484	2.10827	2.04629	2.57544	2.06721	1.8847	1.82188	0.185544	1.37104	0.48612	1.42284	1.5794	1.68735	0.593343	0.645314	1.58455	1.68869	0.647268
1.296	1.7838	1.68711	2.02155	0.405761	-2.2446	-2.07113	0.309827	0.946382	0.111713	0.535778	1.65131	2.10502	2.04299	2.57251	2.06383	1.88131	1.8185	0.179863	1.36545	0.479783	1.41729	1.57398	1.68202	0.587094	0.639108	1.57914	1.68336	0.641062
1.297	1.77953	1.68275	2.01747	0.400348	-2.25223	-2.07863	0.304327	0.941405	0.106039	0.530452	1.64777	2.10176	2.03968	2.56957	2.06046	1.87791	1.81511	0.174183	1.35985	0.473447	1.41174	1.56856	1.67669	0.580845	0.632902	1.57372	1.67803	0.634856
1.298	1.77525	1.67839	2.01339	0.394934	-2.25986	-2.08614	0.298826	0.936428	0.100364	0.525126	1.64423	2.0985	2.03638	2.56664	2.05708	1.87452	1.81172	0.168503	1.35426	0.46711	1.40619	1.56315	1.67136	0.574596	0.626697	1.5683	1.6727	0.62865
1.299	1.77098	1.67402	2.00931	0.389521	-2.26749	-2.09364	0.293326	0.931451	0.0946899	0.519799	1.64069	2.09525	2.03308	2.56371	2.0537	1.87112	1.80834	0.162823	1.34867	0.460774	1.40064	1.55773	1.66603	0.568347	0.620491	1.56288	1.66737	0.622445
1.3	1.76671	1.66966	2.00524	0.384107	-2.27512	-2.10115	0.287825	0.926474	0.0890156	0.514473	1.63715	2.09199	2.02977	2.56078	2.05032	1.86773	1.80495	0.157142	1.34308	0.454437	1.39509	1.55231	1.6607	0.562098	0.614286	1.55747	1.66204	0.616239
1.301	1.76244	1.66529	2.00116	0.378694	-2.28275	-2.10865	0.282325	0.921497	0.0833412	0.509147	1.63361	2.08873	2.02647	2.55785	2.04695	1.86433	1.80156	0.151462	1.33748	0.448101	1.38955	1.54689	1.65537	0.555849	0.60808	1.55205	1.65671	0.610033
1.302	1.75816	1.66093	1.99708	0.37328	-2.29038	-2.11616	0.276824	0.91652	0.0776669	0.50382	1.63007	2.08547	2.02317	2.55491	2.04357	1.86094	1.79818	0.145782	1.33189	0.441764	1.384	1.54148	1.65004	0.549599	0.601875	1.54663	1.65138	0.603827
1.303	1.75389	1.65657	1.993	0.367867	-2.29801	-2.12366	0.271324	0.911543	0.0719925	0.498494	1.62653	2.08222	2.01986	2.55198	2.04019	1.85754	1.79479	0.140101	1.3263	0.435428	1.37845	1.53606	1.64471	0.54335	0.595669	1.54121	1.64605	0.597622
1.304	1.74962	1.6522	1.98892	0.362453	-2.30564	-2.13116	0.265823	0.906565	0.0663182	0.493168	1.62299	2.07896	2.01656	2.54905	2.03681	1.85415	1.79141	0.134421	1.3207	0.429091	1.3729	1.53064	1.63938	0.537101	0.589463	1.5358	1.64072	0.591416
1.305	1.74535	1.64784	1.98484	0.35704	-2.31327	-2.13867	0.260323	0.901588	0.0606439	0.487841	1.61945	2.0757	2.01326	2.54611	2.03343	1.85075	1.78802	0.128741	1.31511	0.422754	1.36735	1.52522	1.63405	0.530852	0.583258	1.53038	1.63539	0.58521
1.306	1.74108	1.64347	1.98076	0.351626	-2.3209	-2.14617	0.254823	0.896611	0.0549695	0.482515	1.61591	2.07245	2.00995	2.54318	2.03006	1.84736	1.78463	0.123061	1.30952	0.416418	1.3618	1.51981	1.62872	0.524603	0.577052	1.52496	1.63006	0.579004
1.307	1.7368	1.63911	1.97668	0.346213	-2.32853	-2.15368	0.249322	0.891634	0.0492952	0.477189	1.61237	2.06919	2.00665	2.54025	2.02668	1.84397	1.78125	0.11738	1.30393	0.410081	1.35625	1.51439	1.62339	0.518354	0.570847	1.51954	1.62473	0.572799
1.308	1.73253	1.63474	1.9726	0.3408	-2.33616	-2.16118	0.243822	0.886657	0.0436208	0.471863	1.60883	2.06593	2.00335	2.53732	2.0233	1.84057	1.77786	0.1117	1.29833	0.403745	1.3507	1.50897	1.61806	0.512105	0.564641	1.51413	1.6194	0.566593
1.309	1.72826	1.63038	1.96852	0.335386	-2.34379	-2.16868	0.238321	0.88168	0.0379465	0.466536	1.60529	2.06267	2.00004	2.53438	2.01992	1.83718	1.77447	0.10602	1.29274	0.397408	1.34515	1.50355	1.61273	0.505856	0.558436	1.50871	1.61407	0.560387
1.31	1.72399	1.62602	1.96444	0.329973	-2.35141	-2.17619	0.232821	0.876703	0.0322721	0.46121	1.60175	2.05942	1.99674	2.53145	2.01654	1.83378	1.77109	0.100339	1.28715	0.391072	1.3396	1.49814	1.6074	0.499607	0.55223	1.50329	1.60874	0.554181
1.311	1.71971	1.62165	1.96036	0.324559	-2.35904	-2.18369	0.22732	0.871726	0.0265978	0.455884	1.59821	2.05616	1.99344	2.52852	2.01317	1.83039	1.7677	0.0946592	1.28155	0.384735	1.33405	1.49272	1.60207	0.493357	0.546024	1.49787	1.60341	0.547976
1.312	1.71544	1.61729	1.95628	0.319146	-2.36667	-2.1912	0.22182	0.866749	0.0209235	0.450557	1.59467	2.0529	1.99013	2.52558	2.00979	1.82699	1.76431	0.0889789	1.27596	0.378399	1.32851	1.4873	1.59674	0.487108	0.539819	1.49246	1.59808	0.54177
1.313	1.71117	1.61292	1.9522	0.313732	-2.3743	-2.1987	0.216319	0.861772	0.0152491	0.445231	1.59113	2.04964	1.98683	2.52265	2.00641	1.8236	1.76093	0.0832987	1.27037	0.372062	1.32296	1.48188	1.59141	0.480859	0.533613	1.48704	1.59275	0.535564
1.314	1.7069	1.60856	1.94812	0.308319	-2.38193	-2.20621	0.210819	0.856795	0.00957477	0.439905	1.58759	2.04639	1.98352	2.51972	2.00303	1.8202	1.75754	0.0776184	1.26478	0.365726	1.31741	1.47647	1.58608	0.47461	0.527408	1.48162	1.58742	0.529359
1.315	1.70263	1.6042	1.94404	0.302905	-2.38956	-2.21371	0.205318	0.851818	0.00390043	0.434579	1.58405	2.04313	1.98022	2.51678	1.99965	1.81681	1.75416	0.0719381	1.25918	0.359389	1.31186	1.47105	1.58075	0.468361	0.521202	1.4762	1.58209	0.523153
1.316	1.69835	1.59983	1.93996	0.297492	-2.39719	-2.22121	0.199818	0.846841	-0.0017739	0.429252	1.58051	2.03987	1.97692	2.51385	1.99628	1.81341	1.75077	0.0662578	1.25359	0.353053	1.30631	1.46563	1.57542	0.462112	0.514996	1.47079	1.57676	0.516947
1.317	1.69408	1.59547	1.93588	0.292078	-2.40482	-2.22872	0.194318	0.841864	-0.0074483	0.423926	1.57697	2.03661	1.97361	2.51091	1.9929	1.81002	1.74738	0.0605775	1.248	0.346716	1.30076	1.46021	1.57009	0.455863	0.508791	1.46537	1.57143	0.510741
1.318	1.68981	1.5911	1.9318	0.286665	-2.41245	-2.23622	0.188817	0.836887	-0.0131226	0.4186	1.57343	2.03336	1.97031	2.50798	1.98952	1.80663	1.744	0.0548973	1.2424	0.34038	1.29521	1.4548	1.56476	0.449614	0.502585	1.45995	1.5661	0.504536
1.319	1.68554	1.58674	1.92772	0.281251	-2.42008	-2.24373	0.183317	0.83191	-0.0187969	0.413273	1.56989	2.0301	1.96701	2.50504	1.98614	1.80323	1.74061	0.049217	1.23681	0.334043	1.28966	1.44938	1.55943	0.443365	0.49638	1.45453	1.56077	0.49833
1.32	1.68127	1.58237	1.92365	0.275838	-2.42771	-2.25123	0.177816	0.826933	-0.0244713	0.407947	1.56635	2.02684	1.9637	2.50211	1.98276	1.79984	1.73722	0.0435367	1.23122	0.327707	1.28411	1.44396	1.5541	0.437116	0.490174	1.44912	1.55544	0.492124
1.321	1.67699	1.57801	1.91957	0.270425	-2.43534	-2.25874	0.172316	0.821955	-0.0301456	0.402621	1.56281	2.02358	1.9604	2.49918	1.97939	1.79644	1.73384	0.0378564	1.22563	0.32137	1.27856	1.43854	1.54877	0.430866	0.483969	1.4437	1.55011	0.485918
1.322	1.67272	1.57365	1.91549	0.265011	-2.44297	-2.26624	0.166815	0.816978	-0.03582	0.397294	1.55927	2.02033	1.95709	2.49624	1.97601	1.79305	1.73045	0.0321762	1.22003	0.315034	1.27302	1.43313	1.54344	0.424617	0.477763	1.43828	1.54478	0.479713
1.323	1.66845	1.56928	1.91141	0.259598	-2.4506	-2.27374	0.161315	0.812001	-0.0414943	0.391968	1.55573	2.01707	1.95379	2.49331	1.97263	1.78965	1.72706	0.0264959	1.21444	0.308697	1.26747	1.42771	1.53811	0.418368	0.471557	1.43286	1.53945	0.473507
1.324	1.66418	1.56492	1.90733	0.254184	-2.45823	-2.28125	0.155814	0.807024	-0.0471687	0.386642	1.55219	2.01381	1.95049	2.49037	1.96925	1.78626	1.72368	0.0208156	1.20885	0.302361	1.26192	1.42229	1.53278	0.412119	0.465352	1.42745	1.53413	0.467301
1.325	1.6599	1.56055	1.90325	0.248771	-2.46586	-2.28875	0.150314	0.802047	-0.052843	0.381316	1.54865	2.01055	1.94718	2.48744	1.96587	1.78286	1.72029	0.0151353	1.20325	0.296024	1.25637	1.41687	1.52745	0.40587	0.459146	1.42203	1.5288	0.461095
1.326	1.65563	1.55619	1.89917	0.243357	-2.47349	-2.29626	0.144814	0.79707	-0.0585174	0.375989	1.54511	2.00729	1.94388	2.4845	1.96249	1.77947	1.7169	0.00945503	1.19766	0.289688	1.25082	1.41146	1.52212	0.399621	0.452941	1.41661	1.52347	0.45489
1.327	1.65136	1.55182	1.89509	0.237944	-2.48112	-2.30376	0.139313	0.792093	-0.0641917	0.370663	1.54157	2.00404	1.94058	2.48157	1.95912	1.77607	1.71352	0.00377475	1.19207	0.283351	1.24527	1.40604	1.5168	0.393372	0.446735	1.41119	1.51814	0.448684
1.328	1.64709	1.54746	1.89101	0.23253	-2.48875	-2.31126	0.133813	0.787116	-0.069866	0.365337	1.53803	2.00078	1.93727	2.47863	1.95574	1.77268	1.71013	-0.0019055	1.18647	0.277014	1.23972	1.40062	1.51147	0.387123	0.440529	1.40578	1.51281	0.442478
1.329	1.64282	1.5431	1.88693	0.227117	-2.49638	-2.31877	0.128312	0.782139	-0.0755404	0.36001	1.53449	1.99752	1.93397	2.4757	1.95236	1.76928	1.70674	-0.0075858	1.18088	0.270678	1.23417	1.3952	1.50614	0.380874	0.434324	1.40036	1.50748	0.436272
1.33	1.63854	1.53873	1.88285	0.221703	-2.50401	-2.32627	0.122812	0.777162	-0.0812147	0.354684	1.53095	1.99426	1.93066	2.47276	1.94898	1.76589	1.70336	-0.0132661	1.17529	0.264341	1.22862	1.38979	1.50081	0.374624	0.428118	1.39494	1.50215	0.430067
1.331	1.63427	1.53437	1.87877	0.21629	-2.51164	-2.33378	0.117311	0.772185	-0.0868891	0.349358	1.52741	1.991	1.92736	2.46982	1.9456	1.7625	1.69997	-0.0189464	1.1697	0.258005	1.22307	1.38437	1.49548	0.368375	0.421913	1.38952	1.49682	0.423861
1.332	1.63	1.53	1.87469	0.210876	-2.51927	-2.34128	0.111811	0.767208	-0.0925634	0.344031	1.52387	1.98775	1.92406	2.46689	1.94222	1.7591	1.69658	-0.0246267	1.1641	0.251668	1.21753	1.37895	1.49015	0.362126	0.415707	1.38411	1.49149	0.417655
1.333	1.62573	1.52564	1.87061	0.205463	-2.5269	-2.34879	0.10631	0.762231	-0.0982378	0.338705	1.52033	1.98449	1.92075	2.46395	1.93885	1.75571	1.6932	-0.0303069	1.15851	0.245332	1.21198	1.37353	1.48482	0.355877	0.409502	1.37869	1.48616	0.411449
1.334	1.62145	1.52128	1.86653	0.200049	-2.53453	-2.35629	0.10081	0.757254	-0.103912	0.333379	1.51679	1.98123	1.91745	2.46102	1.93547	1.75231	1.68981	-0.0359872	1.15292	0.238995	1.20643	1.36812	1.47949	0.349628	0.403296	1.37327	1.48083	0.405244
1.335	1.61718	1.51691	1.86245	0.194636	-2.54216	-2.36379	0.0953095	0.752277	-0.109586	0.328053	1.51325	1.97797	1.91414	2.45808	1.93209	1.74892	1.68642	-0.0416675	1.14732	0.232659	1.20088	1.3627	1.47416	0.343379	0.39709	1.36785	1.4755	0.399038
1.336	1.61291	1.51255	1.85837	0.189223	-2.54979	-2.3713	0.0898091	0.7473	-0.115261	0.322726	1.50971	1.97471	1.91084	2.45515	1.92871	1.74552	1.68304	-0.0473478	1.14173	0.226322	1.19533	1.35728	1.46883	0.33713	0.390885	1.36244	1.47017	0.392832
1.337	1.60864	1.50818	1.85429	0.183809	-2.55742	-2.3788	0.0843086	0.742323	-0.120935	0.3174	1.50617	1.97146	1.90754	2.45221	1.92533	1.74213	1.67965	-0.0530281	1.13614	0.219986	1.18978	1.35186	1.4635	0.330881	0.384679	1.35702	1.46484	0.386626
1.338	1.60437	1.50382	1.85021	0.178396	-2.56505	-2.38631	0.0788082	0.737345	-0.12661	0.312074	1.50263	1.9682	1.90423	2.44927	1.92195	1.73873	1.67626	-0.0587083	1.13055	0.213649	1.18423	1.34645	1.45817	0.324632	0.378474	1.3516	1.45951	0.380421
1.339	1.60009	1.49945	1.84614	0.172982	-2.57268	-2.39381	0.0733078	0.732368	-0.132284	0.306747	1.49909	1.96494	1.90093	2.44634	1.91857	1.73534	1.67288	-0.0643886	1.12495	0.207313	1.17868	1.34103	1.45284	0.318383	0.372268	1.34618	1.45418	0.374215
1.34	1.59582	1.49509	1.84206	0.167569	-2.58031	-2.40131	0.0678073	0.727391	-0.137958	0.301421	1.49555	1.96168	1.89762	2.4434	1.9152	1.73194	1.66949	-0.0700689	1.11936	0.200976	1.17313	1.33561	1.44751	0.312133	0.366063	1.34077	1.44885	0.368009
1.341	1.59155	1.49073	1.83798	0.162155	-2.58794	-2.40882	0.0623069	0.722414	-0.143632	0.296095	1.49201	1.95842	1.89432	2.44046	1.91182	1.72855	1.6661	-0.0757492	1.11377	0.19464	1.16758	1.33019	1.44218	0.305884	0.359857	1.33535	1.44352	0.361804
1.342	1.58728	1.48636	1.8339	0.156742	-2.59557	-2.41632	0.0568064	0.717437	-0.149307	0.290769	1.48847	1.95517	1.89101	2.43753	1.90844	1.72515	1.66272	-0.0814295	1.10817	0.188303	1.16203	1.32478	1.43685	0.299635	0.353651	1.32993	1.43819	0.355598
1.343	1.583	1.482	1.82982	0.151328	-2.6032	-2.42383	0.051306	0.71246	-0.154981	0.285442	1.48493	1.95191	1.88771	2.43459	1.90506	1.72176	1.65933	-0.0871097	1.10258	0.181967	1.15649	1.31936	1.43152	0.293386	0.347446	1.32451	1.43286	0.349392
1.344	1.57873	1.47763	1.82574	0.145915	-2.61083	-2.43133	0.0458055	0.707483	-0.160656	0.280116	1.48139	1.94865	1.88441	2.43165	1.90168	1.71837	1.65594	-0.09279	1.09699	0.17563	1.15094	1.31394	1.42619	0.287137	0.34124	1.3191	1.42753	0.343186
1.345	1.57446	1.47327	1.82166	0.140501	-2.61846	-2.43884	0.0403051	0.702506	-0.16633	0.27479	1.47785	1.94539	1.8811	2.42872	1.8983	1.71497	1.65256	-0.0984703	1.0914	0.169294	1.14539	1.30852	1.42086	0.280888	0.335035	1.31368	1.4222	0.336981
1.346	1.57019	1.4689	1.81758	0.135088	-2.62609	-2.44634	0.0348046	0.697529	-0.172004	0.269463	1.47431	1.94213	1.8778	2.42578	1.89492	1.71158	1.64917	-0.104151	1.0858	0.162957	1.13984	1.30311	1.41553	0.274639	0.328829	1.30826	1.41687	0.330775
1.347	1.56592	1.46454	1.8135	0.129674	-2.63372	-2.45384	0.0293042	0.692552	-0.177679	0.264137	1.47077	1.93887	1.87449	2.42284	1.89155	1.70818	1.64578	-0.109831	1.08021	0.156621	1.13429	1.29769	1.4102	0.26839	0.322623	1.30284	1.41154	0.324569
1.348	1.56164	1.46018	1.80942	0.124261	-2.64135	-2.46135	0.0238037	0.687575	-0.183353	0.258811	1.46723	1.93562	1.87119	2.41991	1.88817	1.70479	1.6424	-0.115511	1.07462	0.150284	1.12874	1.29227	1.40487	0.262141	0.316418	1.29743	1.40621	0.318363
1.349	1.55737	1.45581	1.80534	0.118848	-2.64898	-2.46885	0.0183033	0.682598	-0.189027	0.253484	1.46369	1.93236	1.86789	2.41697	1.88479	1.70139	1.63901	-0.121191	1.06902	0.143948	1.12319	1.28685	1.39954	0.255891	0.310212	1.29201	1.40088	0.312158
1.35	1.5531	1.45145	1.80126	0.113434	-2.65661	-2.47636	0.0128028	0.677621	-0.194702	0.248158	1.46015	1.9291	1.86458	2.41403	1.88141	1.698	1.63562	-0.126872	1.06343	0.137611	1.11764	1.28144	1.39421	0.249642	0.304007	1.28659	1.39555	0.305952
1.351	1.54883	1.44708	1.79718	0.108021	-2.66424	-2.48386	0.0073024	0.672644	-0.200376	0.242832	1.45661	1.92584	1.86128	2.41109	1.87803	1.6946	1.63224	-0.132552	1.05784	0.131274	1.11209	1.27602	1.38888	0.243393	0.297801	1.28117	1.39022	0.299746
1.352	1.54456	1.44272	1.7931	0.102607	-2.67187	-2.49136	0.00180195	0.667667	-0.20605	0.237506	1.45307	1.92258	1.85797	2.40816	1.87465	1.69121	1.62885	-0.138232	1.05225	0.124938	1.10654	1.2706	1.38355	0.237144	0.291596	1.27576	1.38489	0.29354
1.353	1.54028	1.43836	1.78902	0.0971937	-2.6795	-2.49887	-0.0036985	0.66269	-0.211725	0.232179	1.44953	1.91932	1.85467	2.40522	1.87127	1.68781	1.62546	-0.143912	1.04665	0.118601	1.101	1.26518	1.37822	0.230895	0.28539	1.27034	1.37956	0.287335
1.354	1.53601	1.43399	1.78494	0.0917802	-2.68713	-2.50637	-0.0091989	0.657713	-0.217399	0.226853	1.44599	1.91607	1.85136	2.40228	1.86789	1.68442	1.62208	-0.149593	1.04106	0.112265	1.09545	1.25977	1.37289	0.224646	0.279184	1.26492	1.37423	0.281129
1.355	1.53174	1.42963	1.78086	0.0863668	-2.69476	-2.51388	-0.0146994	0.652736	-0.223073	0.221527	1.44245	1.91281	1.84806	2.39934	1.86452	1.68102	1.61869	-0.155273	1.03547	0.105928	1.0899	1.25435	1.36756	0.218397	0.272979	1.2595	1.3689	0.274923
1.356	1.52747	1.42526	1.77678	0.0809533	-2.70239	-2.52138	-0.0201998	0.647758	-0.228748	0.2162	1.43891	1.90955	1.84476	2.39641	1.86114	1.67763	1.6153	-0.160953	1.02987	0.0995918	1.08435	1.24893	1.36223	0.212148	0.266773	1.25409	1.36357	0.268717
1.357	1.52319	1.4209	1.7727	0.0755399	-2.71002	-2.52889	-0.0257003	0.642781	-0.234422	0.210874	1.43537	1.90629	1.84145	2.39347	1.85776	1.67423	1.61192	-0.166634	1.02428	0.0932553	1.0788	1.24351	1.3569	0.205899	0.260568	1.24867	1.35824	0.262512
1.358	1.51892	1.41653	1.76863	0.0701264	-2.71765	-2.53639	-0.0312007	0.637804	-0.240096	0.205548	1.43183	1.90303	1.83815	2.39053	1.85438	1.67084	1.60853	-0.172314	1.01869	0.0869188	1.07325	1.2381	1.35157	0.19965	0.254362	1.24325	1.35292	0.256306
1.359	1.51465	1.41217	1.76455	0.0647129	-2.72528	-2.54389	-0.0367012	0.632827	-0.245771	0.200221	1.42829	1.89977	1.83484	2.38759	1.851	1.66744	1.60514	-0.177994	1.0131	0.0805823	1.0677	1.23268	1.34624	0.1934	0.248156	1.23784	1.34759	0.2501
1.36	1.51038	1.40781	1.76047	0.0592995	-2.73291	-2.5514	-0.0422016	0.62785	-0.251445	0.194895	1.42475	1.89652	1.83154	2.38465	1.84762	1.66405	1.60175	-0.183674	1.0075	0.0742458	1.06215	1.22726	1.34091	0.187151	0.241951	1.23242	1.34226	0.243894
1.361	1.50611	1.40344	1.75639	0.053886	-2.74054	-2.5589	-0.0477021	0.622873	-0.257119	0.189569	1.42121	1.89326	1.82823	2.38172	1.84424	1.66066	1.59837	-0.189355	1.00191	0.0679092	1.0566	1.22184	1.33558	0.180902	0.235745	1.227	1.33693	0.237689
1.362	1.50183	1.39908	1.75231	0.0484726	-2.74817	-2.56641	-0.0532025	0.617896	-0.262794	0.184243	1.41767	1.89	1.82493	2.37878	1.84086	1.65726	1.59498	-0.195035	0.996317	0.0615727	1.05105	1.21643	1.33025	0.174653	0.22954	1.22158	1.3316	0.231483
1.363	1.49756	1.39471	1.74823	0.0430591	-2.7558	-2.57391	-0.058703	0.612919	-0.268468	0.178916	1.41413	1.88674	1.82162	2.37584	1.83748	1.65387	1.59159	-0.200715	0.990725	0.0552362	1.04551	1.21101	1.32492	0.168404	0.223334	1.21617	1.32627	0.225277
1.364	1.49329	1.39035	1.74415	0.0376456	-2.76343	-2.58141	-0.0642034	0.607942	-0.274142	0.17359	1.41059	1.88348	1.81832	2.3729	1.83411	1.65047	1.58821	-0.206396	0.985132	0.0488997	1.03996	1.20559	1.31959	0.162155	0.217129	1.21075	1.32094	0.219071
1.365	1.48902	1.38599	1.74007	0.0322322	-2.77106	-2.58892	-0.0697039	0.602965	-0.279817	0.168264	1.40705	1.88022	1.81502	2.36996	1.83073	1.64708	1.58482	-0.212076	0.979539	0.0425632	1.03441	1.20017	1.31426	0.155906	0.210923	1.20533	1.31561	0.212866
1.366	1.48474	1.38162	1.73599	0.0268187	-2.77869	-2.59642	-0.0752043	0.597988	-0.285491	0.162937	1.40351	1.87696	1.81171	2.36702	1.82735	1.64368	1.58143	-0.217756	0.973946	0.0362266	1.02886	1.19476	1.30893	0.149657	0.204717	1.19991	1.31028	0.20666
1.367	1.48047	1.37726	1.73191	0.0214052	-2.78632	-2.60393	-0.0807047	0.593011	-0.291165	0.157611	1.39997	1.87371	1.80841	2.36408	1.82397	1.64029	1.57805	-0.223436	0.968353	0.0298901	1.02331	1.18934	1.3036	0.143408	0.198512	1.1945	1.30495	0.200454
1.368	1.4762	1.37289	1.72783	0.0159918	-2.79395	-2.61143	-0.0862052	0.588034	-0.29684	0.152285	1.39643	1.87045	1.8051	2.36115	1.82059	1.63689	1.57466	-0.229117	0.96276	0.0235536	1.01776	1.18392	1.29827	0.137158	0.192306	1.18908	1.29962	0.194248
1.369	1.47193	1.36853	1.72375	0.0105783	-2.80158	-2.61894	-0.0917056	0.583057	-0.302514	0.146958	1.39289	1.86719	1.8018	2.35821	1.81721	1.6335	1.57127	-0.234797	0.957167	0.0172171	1.01221	1.1785	1.29294	0.130909	0.186101	1.18366	1.29429	0.188043
1.37	1.46766	1.36416	1.71967	0.00516485	-2.80921	-2.62644	-0.0972061	0.57808	-0.308188	0.141632	1.38935	1.86393	1.79849	2.35527	1.81383	1.6301	1.56789	-0.240477	0.951575	0.0108805	1.00666	1.17309	1.28761	0.12466	0.179895	1.17824	1.28896	0.181837
1.371	1.46338	1.3598	1.71559	-0.0002486	-2.81684	-2.63394	-0.102707	0.573103	-0.313863	0.136306	1.38581	1.86067	1.79519	2.35233	1.81045	1.62671	1.5645	-0.246158	0.945982	0.00454403	1.00111	1.16767	1.28228	0.118411	0.17369	1.17283	1.28363	0.175631
1.372	1.45911	1.35544	1.71151	-0.0056621	-2.82447	-2.64145	-0.108207	0.568126	-0.319537	0.13098	1.38227	1.85741	1.79188	2.34939	1.80707	1.62331	1.56111	-0.251838	0.940389	-0.0017925	0.995564	1.16225	1.27696	0.112162	0.167484	1.16741	1.2783	0.169426
1.373	1.45484	1.35107	1.70743	-0.0110755	-2.83209	-2.64895	-0.113707	0.563148	-0.325211	0.125653	1.37873	1.85415	1.78858	2.34645	1.80369	1.61992	1.55772	-0.257518	0.934796	-0.008129	0.990015	1.15683	1.27163	0.105913	0.161278	1.16199	1.27297	0.16322
1.374	1.45057	1.34671	1.70335	-0.016489	-2.83972	-2.65646	-0.119208	0.558171	-0.330886	0.120327	1.37519	1.85089	1.78527	2.34351	1.80032	1.61652	1.55434	-0.263198	0.929203	-0.0144655	0.984466	1.15142	1.2663	0.0996638	0.155073	1.15657	1.26764	0.157014
1.375	1.44629	1.34234	1.69927	-0.0219025	-2.84735	-2.66396	-0.124708	0.553194	-0.33656	0.115001	1.37165	1.84764	1.78197	2.34057	1.79694	1.61313	1.55095	-0.268879	0.92361	-0.0208021	0.978917	1.146	1.26097	0.0934147	0.148867	1.15116	1.26231	0.150808
1.376	1.44202	1.33798	1.69519	-0.0273159	-2.85498	-2.67146	-0.130209	0.548217	-0.342234	0.109674	1.36811	1.84438	1.77866	2.33763	1.79356	1.60973	1.54756	-0.274559	0.918017	-0.0271386	0.973368	1.14058	1.25564	0.0871656	0.142662	1.14574	1.25698	0.144603
1.377	1.43775	1.33361	1.69112	-0.0327294	-2.86261	-2.67897	-0.135709	0.54324	-0.347909	0.104348	1.36457	1.84112	1.77536	2.33469	1.79018	1.60634	1.54418	-0.280239	0.912424	-0.0334751	0.967819	1.13516	1.25031	0.0809165	0.136456	1.14032	1.25165	0.138397
1.378	1.43348	1.32925	1.68704	-0.0381429	-2.87024	-2.68647	-0.14121	0.538263	-0.353583	0.0990218	1.36103	1.83786	1.77206	2.33175	1.7868	1.60294	1.54079	-0.285919	0.906832	-0.0398116	0.96227	1.12975	1.24498	0.0746674	0.13025	1.1349	1.24632	0.132191
1.379	1.42921	1.32489	1.68296	-0.0435563	-2.87787	-2.69398	-0.14671	0.533286	-0.359258	0.0936955	1.35749	1.8346	1.76875	2.32881	1.78342	1.59955	1.5374	-0.2916	0.901239	-0.0461482	0.956721	1.12433	1.23965	0.0684183	0.124045	1.12949	1.24099	0.125985
1.38	1.42493	1.32052	1.67888	-0.0489698	-2.8855	-2.70148	-0.152211	0.528309	-0.364932	0.0883692	1.35395	1.83134	1.76545	2.32587	1.78004	1.59616	1.53402	-0.29728	0.895646	-0.0524847	0.951172	1.11891	1.23432	0.0621692	0.117839	1.12407	1.23566	0.11978
1.381	1.42066	1.31616	1.6748	-0.0543832	-2.89313	-2.70899	-0.157711	0.523332	-0.370606	0.0830429	1.35041	1.82808	1.76214	2.32294	1.77666	1.59276	1.53063	-0.30296	0.890053	-0.0588212	0.945623	1.11349	1.22899	0.0559201	0.111634	1.11865	1.23033	0.113574
1.382	1.41639	1.31179	1.67072	-0.0597967	-2.90076	-2.71649	-0.163211	0.518355	-0.376281	0.0777166	1.34687	1.82482	1.75884	2.32	1.77328	1.58937	1.52724	-0.308641	0.88446	-0.0651577	0.940074	1.10808	1.22366	0.049671	0.105428	1.11323	1.225	0.107368
1.383	1.41212	1.30743	1.66664	-0.0652102	-2.90839	-2.72399	-0.168712	0.513378	-0.381955	0.0723903	1.34333	1.82156	1.75553	2.31706	1.7699	1.58597	1.52385	-0.314321	0.878867	-0.0714942	0.934525	1.10266	1.21833	0.0434219	0.0992226	1.10782	1.21967	0.101162
1.384	1.40785	1.30307	1.66256	-0.0706236	-2.91602	-2.7315	-0.174212	0.508401	-0.387629	0.0670641	1.33979	1.81831	1.75223	2.31412	1.76652	1.58258	1.52047	-0.320001	0.873274	-0.0778308	0.928976	1.09724	1.213	0.0371728	0.093017	1.1024	1.21434	0.0949566
1.385	1.40357	1.2987	1.65848	-0.0760371	-2.92365	-2.739	-0.179713	0.503424	-0.393304	0.0617378	1.33625	1.81505	1.74892	2.31118	1.76314	1.57918	1.51708	-0.325682	0.867682	-0.0841673	0.923427	1.09182	1.20767	0.0309237	0.0868114	1.09698	1.20901	0.0887509
1.386	1.3993	1.29434	1.6544	-0.0814506	-2.93128	-2.74651	-0.185213	0.498447	-0.398978	0.0564115	1.33271	1.81179	1.74562	2.30824	1.75977	1.57579	1.51369	-0.331362	0.862089	-0.0905038	0.917877	1.08641	1.20234	0.0246746	0.0806058	1.09156	1.20368	0.0825452
1.387	1.39503	1.28997	1.65032	-0.086864	-2.93891	-2.75401	-0.190714	0.49347	-0.404652	0.0510852	1.32917	1.80853	1.74231	2.3053	1.75639	1.57239	1.51031	-0.337042	0.856496	-0.0968403	0.912328	1.08099	1.19701	0.0184255	0.0744002	1.08615	1.19835	0.0763394
1.388	1.39076	1.28561	1.64624	-0.0922775	-2.94654	-2.76152	-0.196214	0.488493	-0.410327	0.0457589	1.32563	1.80527	1.73901	2.30236	1.75301	1.569	1.50692	-0.342722	0.850903	-0.103177	0.906779	1.07557	1.19168	0.0121764	0.0681947	1.08073	1.19302	0.0701337
1.389	1.38648	1.28124	1.64216	-0.0976909	-2.95417	-2.76902	-0.201715	0.483516	-0.416001	0.0404326	1.32209	1.80201	1.7357	2.29941	1.74963	1.5656	1.50353	-0.348403	0.84531	-0.109513	0.90123	1.07015	1.18635	0.00592726	0.0619891	1.07531	1.18769	0.0639279
1.39	1.38221	1.27688	1.63808	-0.103104	-2.9618	-2.77652	-0.207215	0.478538	-0.421675	0.0351063	1.31855	1.79875	1.7324	2.29647	1.74625	1.56221	1.50014	-0.354083	0.839717	-0.11585	0.895681	1.06474	1.18102	-0.0003218	0.0557835	1.06989	1.18236	0.0577222
1.391	1.37794	1.27252	1.634	-0.108518	-2.96943	-2.78403	-0.212716	0.473561	-0.42735	0.02978	1.31501	1.79549	1.72909	2.29353	1.74287	1.55881	1.49676	-0.359763	0.834124	-0.122186	0.890132	1.05932	1.17569	-0.006571	0.0495779	1.06448	1.17704	0.0515165
1.392	1.37367	1.26815	1.62992	-0.113931	-2.97706	-2.79153	-0.218216	0.468584	-0.433024	0.0244537	1.31147	1.79223	1.72579	2.29059	1.73949	1.55542	1.49337	-0.365443	0.828531	-0.128523	0.884583	1.0539	1.17036	-0.0128201	0.0433723	1.05906	1.17171	0.0453107
1.393	1.3694	1.26379	1.62584	-0.119345	-2.98469	-2.79904	-0.223716	0.463607	-0.438698	0.0191274	1.30793	1.78897	1.72248	2.28765	1.73611	1.55202	1.48998	-0.371124	0.822939	-0.134859	0.879034	1.04848	1.16503	-0.0190692	0.0371668	1.05364	1.16638	0.039105
1.394	1.36512	1.25942	1.62176	-0.124758	-2.99232	-2.80654	-0.229217	0.45863	-0.444373	0.0138011	1.30439	1.78572	1.71918	2.28471	1.73273	1.54863	1.4866	-0.376804	0.817346	-0.141196	0.873485	1.04307	1.1597	-0.0253183	0.0309612	1.04822	1.16105	0.0328992
1.395	1.36085	1.25506	1.61768	-0.130172	-2.99995	-2.81404	-0.234717	0.453653	-0.450047	0.00847478	1.30085	1.78246	1.71587	2.28177	1.72935	1.54523	1.48321	-0.382484	0.811753	-0.147533	0.867936	1.03765	1.15437	-0.0315674	0.0247556	1.04281	1.15572	0.0266935
1.396	1.35658	1.25069	1.61361	-0.135585	-3.00758	-2.82155	-0.240218	0.448676	-0.455721	0.00314849	1.29731	1.7792	1.71257	2.27883	1.72597	1.54184	1.47982	-0.388165	0.80616	-0.153869	0.862387	1.03223	1.14904	-0.0378165	0.01855	1.03739	1.15039	0.0204877
1.397	1.35231	1.24633	1.60953	-0.140999	-3.01521	-2.82905	-0.245718	0.443699	-0.461396	-0.0021778	1.29377	1.77594	1.70926	2.27589	1.72259	1.53844	1.47643	-0.393845	0.800567	-0.160206	0.856838	1.02681	1.14371	-0.0440656	0.0123444	1.03197	1.14506	0.014282
1.398	1.34803	1.24197	1.60545	-0.146412	-3.02284	-2.83656	-0.251219	0.438722	-0.46707	-0.0075041	1.29023	1.77268	1.70596	2.27295	1.71921	1.53505	1.47305	-0.399525	0.794974	-0.166542	0.851289	1.0214	1.13838	-0.0503147	0.00613885	1.02655	1.13973	0.00807627
1.399	1.34376	1.2376	1.60137	-0.151826	-3.03047	-2.84406	-0.256719	0.433745	-0.472744	-0.0128304	1.28669	1.76942	1.70265	2.27001	1.71583	1.53165	1.46966	-0.405205	0.789381	-0.172879	0.84574	1.01598	1.13305	-0.0565638	-6.67e-05	1.02114	1.1344	0.00187053
1.4	1.33949	1.23324	1.59729	-0.157239	-3.0381	-2.85157	-0.262219	0.428768	-0.478419	-0.0181567	1.28315	1.76616	1.69935	2.26707	1.71245	1.52826	1.46627	-0.410886	0.783789	-0.179215	0.840191	1.01056	1.12772	-0.0628129	-0.0062723	1.01572	1.12907	-0.0043352
1.401	1.33522	1.22887	1.59321	-0.162653	-3.04573	-2.85907	-0.26772	0.423791	-0.484093	-0.023483	1.27961	1.7629	1.69604	2.26413	1.70908	1.52486	1.46289	-0.416566	0.778196	-0.185552	0.834642	1.00514	1.12239	-0.069062	-0.0124779	1.0103	1.12374	-0.010541
1.402	1.33095	1.22451	1.58913	-0.168066	-3.05336	-2.86657	-0.27322	0.418814	-0.489767	-0.0288093	1.27607	1.75964	1.69274	2.26119	1.7057	1.52147	1.4595	-0.422246	0.772603	-0.191888	0.829093	0.999727	1.11706	-0.0753111	-0.0186835	1.00488	1.11841	-0.0167467
1.403	1.32667	1.22015	1.58505	-0.173479	-3.06099	-2.87408	-0.278721	0.413837	-0.495442	-0.0341356	1.27253	1.75638	1.68943	2.25824	1.70232	1.51807	1.45611	-0.427926	0.76701	-0.198225	0.823544	0.994309	1.11173	-0.0815602	-0.024889	0.999465	1.11308	-0.0229524
1.404	1.3224	1.21578	1.58097	-0.178893	-3.06862	-2.88158	-0.284221	0.40886	-0.501116	-0.0394619	1.26899	1.75312	1.68613	2.2553	1.69894	1.51468	1.45272	-0.433607	0.761417	-0.204561	0.817995	0.988892	1.1064	-0.0878093	-0.0310946	0.994048	1.10775	-0.0291582
1.405	1.31813	1.21142	1.57689	-0.184306	-3.07625	-2.88909	-0.289722	0.403883	-0.506791	-0.0447882	1.26545	1.74986	1.68282	2.25236	1.69556	1.51129	1.44934	-0.439287	0.755824	-0.210898	0.812446	0.983474	1.10107	-0.0940584	-0.0373002	0.98863	1.10242	-0.0353639
1.406	1.31386	1.20705	1.57281	-0.18972	-3.08388	-2.89659	-0.295222	0.398906	-0.512465	-0.0501145	1.26191	1.7466	1.67952	2.24942	1.69218	1.50789	1.44595	-0.444967	0.750231	-0.217234	0.806897	0.978057	1.09574	-0.100307	-0.0435058	0.983213	1.09709	-0.0415697
1.407	1.30958	1.20269	1.56873	-0.195133	-3.09151	-2.90409	-0.300723	0.393928	-0.518139	-0.0554408	1.25837	1.74335	1.67621	2.24648	1.6888	1.5045	1.44256	-0.450648	0.744638	-0.223571	0.801348	0.972639	1.09041	-0.106557	-0.0497114	0.977795	1.09176	-0.0477754
1.408	1.30531	1.19832	1.56465	-0.200547	-3.09914	-2.9116	-0.306223	0.388951	-0.523814	-0.0607671	1.25482	1.74009	1.67291	2.24354	1.68542	1.5011	1.43918	-0.456328	0.739046	-0.229907	0.795799	0.967222	1.08508	-0.112806	-0.055917	0.972378	1.08643	-0.0539811
1.409	1.30104	1.19396	1.56057	-0.20596	-3.10677	-2.9191	-0.311723	0.383974	-0.529488	-0.0660934	1.25128	1.73683	1.6696	2.2406	1.68204	1.49771	1.43579	-0.462008	0.733453	-0.236244	0.79025	0.961804	1.07975	-0.119055	-0.0621225	0.96696	1.0811	-0.0601869
1.41	1.29677	1.1896	1.55649	-0.211374	-3.1144	-2.92661	-0.317224	0.378997	-0.535162	-0.0714197	1.24774	1.73357	1.6663	2.23765	1.67866	1.49431	1.4324	-0.467689	0.72786	-0.24258	0.784701	0.956387	1.07442	-0.125304	-0.0683281	0.961543	1.07577	-0.0663926
1.411	1.2925	1.18523	1.55241	-0.216787	-3.12203	-2.93411	-0.322724	0.37402	-0.540837	-0.076746	1.2442	1.73031	1.66299	2.23471	1.67528	1.49092	1.42901	-0.473369	0.722267	-0.248917	0.779152	0.950969	1.06909	-0.131553	-0.0745337	0.956125	1.07044	-0.0725984
1.412	1.28822	1.18087	1.54833	-0.222201	-3.12966	-2.94162	-0.328225	0.369043	-0.546511	-0.0820723	1.24066	1.72705	1.65969	2.23177	1.6719	1.48752	1.42563	-0.479049	0.716674	-0.255253	0.773603	0.945552	1.06376	-0.137802	-0.0807393	0.950708	1.06511	-0.0788041
1.413	1.28395	1.1765	1.54425	-0.227614	-3.13729	-2.94912	-0.333725	0.364066	-0.552185	-0.0873986	1.23712	1.72379	1.65638	2.22883	1.66852	1.48413	1.42224	-0.484729	0.711081	-0.26159	0.768054	0.940134	1.05843	-0.144051	-0.0869449	0.94529	1.05978	-0.0850098
1.414	1.27968	1.17214	1.54017	-0.233027	-3.14492	-2.95662	-0.339226	0.359089	-0.55786	-0.0927249	1.23358	1.72053	1.65308	2.22589	1.66514	1.48073	1.41885	-0.49041	0.705488	-0.267926	0.762505	0.934717	1.0531	-0.1503	-0.0931504	0.939873	1.05445	-0.0912156
1.415	1.27541	1.16777	1.53609	-0.238441	-3.15255	-2.96413	-0.344726	0.354112	-0.563534	-0.0980512	1.23004	1.71727	1.64977	2.22295	1.66176	1.47734	1.41547	-0.49609	0.699896	-0.274263	0.756956	0.929299	1.04777	-0.15655	-0.099356	0.934455	1.04912	-0.0974213
1.416	1.27113	1.16341	1.53202	-0.243854	-3.16018	-2.97163	-0.350227	0.349135	-0.569208	-0.103377	1.2265	1.71401	1.64647	2.22	1.65838	1.47394	1.41208	-0.50177	0.694303	-0.2806	0.751407	0.923882	1.04244	-0.162799	-0.105562	0.929038	1.04379	-0.103627
1.417	1.26686	1.15905	1.52794	-0.249268	-3.16781	-2.97914	-0.355727	0.344158	-0.574883	-0.108704	1.22296	1.71075	1.64316	2.21706	1.655	1.47055	1.40869	-0.50745	0.68871	-0.286936	0.745858	0.918464	1.03711	-0.169048	-0.111767	0.92362	1.03846	-0.109833
1.418	1.26259	1.15468	1.52386	-0.254681	-3.17544	-2.98664	-0.361227	0.339181	-0.580557	-0.11403	1.21942	1.70749	1.63986	2.21412	1.65162	1.46715	1.4053	-0.513131	0.683117	-0.293272	0.740308	0.913047	1.03179	-0.175297	-0.117973	0.918203	1.03313	-0.116039
1.419	1.25832	1.15032	1.51978	-0.260095	-3.18307	-2.99414	-0.366728	0.334204	-0.586231	-0.119356	1.21588	1.70423	1.63655	2.21118	1.64824	1.46376	1.40192	-0.518811	0.677524	-0.299609	0.734759	0.907629	1.02646	-0.181546	-0.124178	0.912785	1.0278	-0.122244
1.42	1.25405	1.14595	1.5157	-0.265508	-3.1907	-3.00165	-0.372228	0.329227	-0.591906	-0.124683	1.21234	1.70097	1.63325	2.20824	1.64486	1.46036	1.39853	-0.524491	0.671931	-0.305945	0.72921	0.902212	1.02113	-0.187795	-0.130384	0.907368	1.02247	-0.12845
1.421	1.24977	1.14159	1.51162	-0.270922	-3.19833	-3.00915	-0.377729	0.32425	-0.59758	-0.130009	1.2088	1.69771	1.62994	2.20529	1.64148	1.45697	1.39514	-0.530172	0.666338	-0.312282	0.723661	0.896794	1.0158	-0.194044	-0.13659	0.90195	1.01714	-0.134656
1.422	1.2455	1.13723	1.50754	-0.276335	-3.20596	-3.01666	-0.383229	0.319273	-0.603254	-0.135335	1.20526	1.69445	1.62664	2.20235	1.6381	1.45357	1.39176	-0.535852	0.660745	-0.318619	0.718112	0.891377	1.01047	-0.200293	-0.142795	0.896533	1.01181	-0.140862
1.423	1.24123	1.13286	1.50346	-0.281749	-3.21359	-3.02416	-0.38873	0.314296	-0.608929	-0.140661	1.20172	1.6912	1.62333	2.19941	1.63473	1.45018	1.38837	-0.541532	0.655153	-0.324955	0.712563	0.885959	1.00514	-0.206542	-0.149001	0.891115	1.00648	-0.147067
1.424	1.23696	1.1285	1.49938	-0.287162	-3.22122	-3.03167	-0.39423	0.309318	-0.614603	-0.145988	1.19818	1.68794	1.62003	2.19647	1.63135	1.44678	1.38498	-0.547212	0.64956	-0.331292	0.707014	0.880542	0.999807	-0.212791	-0.155206	0.885698	1.00115	-0.153273
1.425	1.23269	1.12413	1.4953	-0.292576	-3.22885	-3.03917	-0.399731	0.304341	-0.620277	-0.151314	1.19464	1.68468	1.61672	2.19352	1.62797	1.44339	1.38159	-0.552893	0.643967	-0.337628	0.701465	0.875124	0.994477	-0.21904	-0.161412	0.880281	0.995825	-0.159479
1.426	1.22841	1.11977	1.49122	-0.297989	-3.23648	-3.04667	-0.405231	0.299364	-0.625952	-0.15664	1.1911	1.68142	1.61342	2.19058	1.62459	1.43999	1.37821	-0.558573	0.638374	-0.343965	0.695916	0.869707	0.989147	-0.22529	-0.167617	0.874863	0.990495	-0.165685
1.427	1.22414	1.1154	1.48714	-0.303403	-3.24411	-3.05418	-0.410732	0.294387	-0.631626	-0.161967	1.18756	1.67816	1.61011	2.18764	1.62121	1.4366	1.37482	-0.564253	0.632781	-0.350301	0.690367	0.864289	0.983817	-0.231539	-0.173823	0.869446	0.985166	-0.17189
1.428	1.21987	1.11104	1.48306	-0.308816	-3.25174	-3.06168	-0.416232	0.28941	-0.6373	-0.167293	1.18402	1.6749	1.60681	2.1847	1.61783	1.4332	1.37143	-0.569933	0.627188	-0.356638	0.684818	0.858872	0.978487	-0.237788	-0.180029	0.864028	0.979836	-0.178096
1.429	1.2156	1.10668	1.47898	-0.314229	-3.25937	-3.06919	-0.421732	0.284433	-0.642975	-0.172619	1.18048	1.67164	1.6035	2.18175	1.61445	1.42981	1.36804	-0.575614	0.621595	-0.362974	0.679269	0.853454	0.973158	-0.244037	-0.186234	0.858611	0.974506	-0.184302
1.43	1.21132	1.10231	1.4749	-0.319643	-3.267	-3.07669	-0.427233	0.279456	-0.648649	-0.177946	1.17694	1.66838	1.6002	2.17881	1.61107	1.42641	1.36466	-0.581294	0.616002	-0.369311	0.67372	0.848037	0.967828	-0.250286	-0.19244	0.853193	0.969177	-0.190507
1.431	1.20705	1.09795	1.47082	-0.325056	-3.27463	-3.08419	-0.432733	0.274479	-0.654323	-0.183272	1.1734	1.66512	1.59689	2.17587	1.60769	1.42302	1.36127	-0.586974	0.61041	-0.375647	0.668171	0.842619	0.962498	-0.256535	-0.198645	0.847776	0.963847	-0.196713
1.432	1.20278	1.09358	1.46674	-0.33047	-3.28226	-3.0917	-0.438234	0.269502	-0.659998	-0.188598	1.16986	1.66186	1.59359	2.17293	1.60431	1.41962	1.35788	-0.592655	0.604817	-0.381984	0.662622	0.837202	0.957168	-0.262784	-0.204851	0.842358	0.958517	-0.202919
1.433	1.19851	1.08922	1.46266	-0.335883	-3.28989	-3.0992	-0.443734	0.264525	-0.665672	-0.193924	1.16632	1.6586	1.59028	2.16998	1.60093	1.41623	1.35449	-0.598335	0.599224	-0.38832	0.657073	0.831784	0.951839	-0.269033	-0.211057	0.836941	0.953188	-0.209125
1.434	1.19424	1.08486	1.45858	-0.341297	-3.29752	-3.10671	-0.449235	0.259548	-0.671346	-0.199251	1.16278	1.65534	1.58698	2.16704	1.59755	1.41283	1.35111	-0.604015	0.593631	-0.394657	0.651524	0.826367	0.946509	-0.275282	-0.217262	0.831523	0.947858	-0.21533
1.435	1.18996	1.08049	1.45451	-0.34671	-3.30515	-3.11421	-0.454735	0.254571	-0.677021	-0.204577	1.15924	1.65208	1.58367	2.1641	1.59417	1.40944	1.34772	-0.609695	0.588038	-0.400993	0.645975	0.820949	0.941179	-0.281532	-0.223468	0.826106	0.942528	-0.221536
1.436	1.18569	1.07613	1.45043	-0.352124	-3.31278	-3.12172	-0.460236	0.249594	-0.682695	-0.209903	1.1557	1.64882	1.58037	2.16115	1.59079	1.40604	1.34433	-0.615376	0.582445	-0.40733	0.640426	0.815532	0.935849	-0.287781	-0.229673	0.820688	0.937198	-0.227742
1.437	1.18142	1.07176	1.44635	-0.357537	-3.3204	-3.12922	-0.465736	0.244617	-0.688369	-0.21523	1.15216	1.64556	1.57706	2.15821	1.58741	1.40265	1.34095	-0.621056	0.576852	-0.413666	0.634877	0.810114	0.930519	-0.29403	-0.235879	0.815271	0.931869	-0.233948
1.438	1.17715	1.0674	1.44227	-0.362951	-3.32803	-3.13672	-0.471237	0.23964	-0.694044	-0.220556	1.14862	1.6423	1.57375	2.15527	1.58403	1.39926	1.33756	-0.626736	0.57126	-0.420003	0.629328	0.804697	0.92519	-0.300279	-0.242084	0.809853	0.926539	-0.240153
1.439	1.17287	1.06303	1.43819	-0.368364	-3.33566	-3.14423	-0.476737	0.234663	-0.699718	-0.225882	1.14508	1.63904	1.57045	2.15233	1.58065	1.39586	1.33417	-0.632417	0.565667	-0.426339	0.623779	0.799279	0.91986	-0.306528	-0.24829	0.804436	0.921209	-0.246359
1.44	1.1686	1.05867	1.43411	-0.373777	-3.34329	-3.15173	-0.482237	0.229686	-0.705392	-0.231209	1.14154	1.63578	1.56714	2.14938	1.57727	1.39247	1.33078	-0.638097	0.560074	-0.432676	0.61823	0.793862	0.91453	-0.312777	-0.254495	0.799018	0.91588	-0.252565
1.441	1.16433	1.05431	1.43003	-0.379191	-3.35092	-3.15924	-0.487738	0.224709	-0.711067	-0.236535	1.138	1.63252	1.56384	2.14644	1.57389	1.38907	1.3274	-0.643777	0.554481	-0.439013	0.612681	0.788444	0.9092	-0.319026	-0.260701	0.793601	0.91055	-0.258771
1.442	1.16006	1.04994	1.42595	-0.384605	-3.35855	-3.16674	-0.493238	0.219731	-0.716741	-0.241861	1.13445	1.62926	1.56053	2.1435	1.57051	1.38568	1.32401	-0.649457	0.548888	-0.445349	0.607132	0.783027	0.90387	-0.325275	-0.266907	0.788183	0.90522	-0.264976
1.443	1.15579	1.04558	1.42187	-0.390018	-3.36618	-3.17425	-0.498739	0.214754	-0.722415	-0.247188	1.13091	1.626	1.55723	2.14055	1.56713	1.38228	1.32062	-0.655138	0.543295	-0.451686	0.601583	0.777609	0.898541	-0.331524	-0.273112	0.782766	0.899891	-0.271182
1.444	1.15151	1.04121	1.41779	-0.395431	-3.37381	-3.18175	-0.504239	0.209777	-0.72809	-0.252514	1.12737	1.62274	1.55392	2.13761	1.56375	1.37889	1.31723	-0.660818	0.537702	-0.458022	0.596034	0.772192	0.893211	-0.337774	-0.279318	0.777348	0.894561	-0.277388
1.445	1.14724	1.03685	1.41371	-0.400845	-3.38144	-3.18925	-0.50974	0.2048	-0.733764	-0.25784	1.12383	1.61948	1.55062	2.13467	1.56037	1.37549	1.31385	-0.666498	0.532109	-0.464359	0.590485	0.766774	0.887881	-0.344023	-0.285523	0.771931	0.889231	-0.283594
1.446	1.14297	1.03248	1.40963	-0.406258	-3.38907	-3.19676	-0.51524	0.199823	-0.739438	-0.263166	1.12029	1.61622	1.54731	2.13172	1.55699	1.3721	1.31046	-0.672179	0.526517	-0.470695	0.584936	0.761357	0.882551	-0.350272	-0.291729	0.766513	0.883901	-0.289799
1.447	1.1387	1.02812	1.40555	-0.411672	-3.3967	-3.20426	-0.520741	0.194846	-0.745113	-0.268493	1.11675	1.61296	1.54401	2.12878	1.55361	1.3687	1.30707	-0.677859	0.520924	-0.477032	0.579387	0.755939	0.877222	-0.356521	-0.297935	0.761096	0.878572	-0.296005
1.448	1.13442	1.02376	1.40147	-0.417085	-3.40433	-3.21177	-0.526241	0.189869	-0.750787	-0.273819	1.11321	1.60971	1.5407	2.12584	1.55023	1.36531	1.30368	-0.683539	0.515331	-0.483368	0.573838	0.750522	0.871892	-0.36277	-0.30414	0.755678	0.873242	-0.302211
1.449	1.13015	1.01939	1.39739	-0.422499	-3.41196	-3.21927	-0.531741	0.184892	-0.756462	-0.279145	1.10967	1.60645	1.5374	2.12289	1.54685	1.36191	1.3003	-0.689219	0.509738	-0.489705	0.568289	0.745104	0.866562	-0.369019	-0.310346	0.750261	0.867912	-0.308416
1.45	1.12588	1.01503	1.39331	-0.427912	-3.41959	-3.22677	-0.537242	0.179915	-0.762136	-0.284471	1.10613	1.60319	1.53409	2.11995	1.54347	1.35852	1.29691	-0.6949	0.504145	-0.496041	0.562739	0.739687	0.861232	-0.375268	-0.316551	0.744843	0.862583	-0.314622
1.451	1.12161	1.01066	1.38923	-0.433326	-3.42722	-3.23428	-0.542742	0.174938	-0.76781	-0.289798	1.10259	1.59993	1.53079	2.117	1.54009	1.35512	1.29352	-0.70058	0.498552	-0.502378	0.55719	0.73427	0.855902	-0.381517	-0.322757	0.739426	0.857253	-0.320828
1.452	1.11734	1.0063	1.38515	-0.438739	-3.43485	-3.24178	-0.548243	0.169961	-0.773485	-0.295124	1.09905	1.59667	1.52748	2.11406	1.53671	1.35173	1.29014	-0.70626	0.492959	-0.508714	0.551641	0.728852	0.850573	-0.387766	-0.328962	0.734008	0.851923	-0.327034
1.453	1.11306	1.00194	1.38107	-0.444153	-3.44248	-3.24929	-0.553743	0.164984	-0.779159	-0.30045	1.09551	1.59341	1.52417	2.11112	1.53333	1.34833	1.28675	-0.71194	0.487367	-0.515051	0.546092	0.723435	0.845243	-0.394016	-0.335168	0.728591	0.846593	-0.33324
1.454	1.10879	0.997571	1.377	-0.449566	-3.45011	-3.25679	-0.559244	0.160007	-0.784833	-0.305777	1.09197	1.59015	1.52087	2.10817	1.52995	1.34494	1.28336	-0.717621	0.481774	-0.521387	0.540543	0.718017	0.839913	-0.400265	-0.341374	0.723173	0.841264	-0.339445
1.455	1.10452	0.993207	1.37292	-0.454979	-3.45774	-3.2643	-0.564744	0.15503	-0.790508	-0.311103	1.08843	1.58689	1.51756	2.10523	1.52657	1.34154	1.27997	-0.723301	0.476181	-0.527724	0.534994	0.7126	0.834583	-0.406514	-0.347579	0.717756	0.835934	-0.345651
1.456	1.10025	0.988843	1.36884	-0.460393	-3.46537	-3.2718	-0.570245	0.150053	-0.796182	-0.316429	1.08489	1.58363	1.51426	2.10229	1.52319	1.33815	1.27659	-0.728981	0.470588	-0.53406	0.529445	0.707182	0.829254	-0.412763	-0.353785	0.712338	0.830604	-0.351857
1.457	1.09598	0.984478	1.36476	-0.465806	-3.473	-3.2793	-0.575745	0.145076	-0.801856	-0.321756	1.08135	1.58037	1.51095	2.09934	1.51981	1.33475	1.2732	-0.734662	0.464995	-0.540397	0.523896	0.701765	0.823924	-0.419012	-0.35999	0.706921	0.825275	-0.358062
1.458	1.0917	0.980114	1.36068	-0.47122	-3.48063	-3.28681	-0.581245	0.140099	-0.807531	-0.327082	1.07781	1.57711	1.50765	2.0964	1.51643	1.33136	1.26981	-0.740342	0.459402	-0.546733	0.518347	0.696347	0.818594	-0.425261	-0.366196	0.701503	0.819945	-0.364268
1.459	1.08743	0.97575	1.3566	-0.476633	-3.48826	-3.29431	-0.586746	0.135121	-0.813205	-0.332408	1.07427	1.57385	1.50434	2.09345	1.51305	1.32796	1.26642	-0.746022	0.453809	-0.55307	0.512798	0.69093	0.813264	-0.43151	-0.372402	0.696086	0.814615	-0.370474
1.46	1.08316	0.971386	1.35252	-0.482047	-3.49589	-3.30182	-0.592246	0.130144	-0.818879	-0.337734	1.07073	1.57059	1.50104	2.09051	1.50967	1.32457	1.26304	-0.751703	0.448216	-0.559406	0.507249	0.685512	0.807934	-0.437759	-0.378607	0.690668	0.809286	-0.37668
1.461	1.07889	0.967022	1.34844	-0.48746	-3.50352	-3.30932	-0.597747	0.125167	-0.824554	-0.343061	1.06719	1.56733	1.49773	2.08757	1.50629	1.32117	1.25965	-0.757383	0.442624	-0.565743	0.5017	0.680095	0.802605	-0.444008	-0.384813	0.685251	0.803956	-0.382885
1.462	1.07461	0.962657	1.34436	-0.492874	-3.51115	-3.31682	-0.603247	0.12019	-0.830228	-0.348387	1.06365	1.56407	1.49443	2.08462	1.50291	1.31778	1.25626	-0.763063	0.437031	-0.572079	0.496151	0.674677	0.797275	-0.450257	-0.391018	0.679833	0.798626	-0.389091
1.463	1.07034	0.958293	1.34028	-0.498287	-3.51878	-3.32433	-0.608748	0.115213	-0.835902	-0.353713	1.06011	1.56081	1.49112	2.08168	1.49953	1.31438	1.25287	-0.768743	0.431438	-0.578416	0.490602	0.66926	0.791945	-0.456506	-0.397224	0.674416	0.793296	-0.395297
1.464	1.06607	0.953929	1.3362	-0.503701	-3.52641	-3.33183	-0.614248	0.110236	-0.841577	-0.35904	1.05657	1.55755	1.48781	2.07873	1.49615	1.31099	1.24949	-0.774424	0.425845	-0.584753	0.485053	0.663842	0.786615	-0.462756	-0.403429	0.668998	0.787967	-0.401503
1.465	1.0618	0.949565	1.33212	-0.509114	-3.53404	-3.33934	-0.619749	0.105259	-0.847251	-0.364366	1.05303	1.55429	1.48451	2.07579	1.49277	1.30759	1.2461	-0.780104	0.420252	-0.591089	0.479504	0.658425	0.781286	-0.469005	-0.409635	0.663581	0.782637	-0.407708
1.466	1.05753	0.945201	1.32804	-0.514528	-3.54167	-3.34684	-0.625249	0.100282	-0.852925	-0.369692	1.04949	1.55103	1.4812	2.07285	1.48939	1.3042	1.24271	-0.785784	0.414659	-0.597426	0.473955	0.653007	0.775956	-0.475254	-0.415841	0.658163	0.777307	-0.413914
1.467	1.05325	0.940836	1.32396	-0.519941	-3.5493	-3.35435	-0.630749	0.095305	-0.8586	-0.375019	1.04595	1.54777	1.4779	2.0699	1.48601	1.3008	1.23932	-0.791464	0.409066	-0.603762	0.468406	0.64759	0.770626	-0.481503	-0.422046	0.652746	0.771978	-0.42012
1.468	1.04898	0.936472	1.31988	-0.525354	-3.55693	-3.36185	-0.63625	0.0903279	-0.864274	-0.380345	1.04241	1.54451	1.47459	2.06696	1.48263	1.29741	1.23594	-0.797145	0.403474	-0.610099	0.462857	0.642172	0.765296	-0.487752	-0.428252	0.647328	0.766648	-0.426326
1.469	1.04471	0.932108	1.3158	-0.530768	-3.56456	-3.36935	-0.64175	0.0853509	-0.869948	-0.385671	1.03886	1.54125	1.47129	2.06401	1.47925	1.29401	1.23255	-0.802825	0.397881	-0.616435	0.457308	0.636755	0.759966	-0.494001	-0.434457	0.641911	0.761318	-0.432531
1.47	1.04044	0.927744	1.31172	-0.536181	-3.57219	-3.37686	-0.647251	0.0803738	-0.875623	-0.390997	1.03532	1.53799	1.46798	2.06107	1.47587	1.29062	1.22916	-0.808505	0.392288	-0.622772	0.451759	0.631337	0.754637	-0.50025	-0.440663	0.636493	0.755989	-0.438737
1.471	1.03616	0.92338	1.30764	-0.541595	-3.57982	-3.38436	-0.652751	0.0753968	-0.881297	-0.396324	1.03178	1.53473	1.46468	2.05812	1.47249	1.28722	1.22577	-0.814186	0.386695	-0.629108	0.44621	0.62592	0.749307	-0.506499	-0.446869	0.631076	0.750659	-0.444943
1.472	1.03189	0.919015	1.30356	-0.547008	-3.58745	-3.39187	-0.658252	0.0704197	-0.886972	-0.40165	1.02824	1.53147	1.46137	2.05518	1.46911	1.28383	1.22239	-0.819866	0.381102	-0.635445	0.440661	0.620502	0.743977	-0.512749	-0.453074	0.625658	0.745329	-0.451149
1.473	1.02762	0.914651	1.29949	-0.552422	-3.59508	-3.39937	-0.663752	0.0654426	-0.892646	-0.406976	1.0247	1.52821	1.45807	2.05223	1.46573	1.28043	1.219	-0.825546	0.375509	-0.641781	0.435112	0.615085	0.738647	-0.518998	-0.45928	0.620241	0.739999	-0.457354
1.474	1.02335	0.910287	1.29541	-0.557835	-3.60271	-3.40687	-0.669253	0.0604656	-0.89832	-0.412303	1.02116	1.52495	1.45476	2.04929	1.46235	1.27704	1.21561	-0.831226	0.369916	-0.648118	0.429563	0.609667	0.733318	-0.525247	-0.465485	0.614823	0.73467	-0.46356
1.475	1.01908	0.905923	1.29133	-0.563249	-3.61034	-3.41438	-0.674753	0.0554885	-0.903995	-0.417629	1.01762	1.52169	1.45145	2.04635	1.45897	1.27364	1.21222	-0.836907	0.364323	-0.654454	0.424014	0.60425	0.727988	-0.531496	-0.471691	0.609406	0.72934	-0.469766
1.476	1.0148	0.901559	1.28725	-0.568662	-3.61797	-3.42188	-0.680253	0.0505115	-0.909669	-0.422955	1.01408	1.51843	1.44815	2.0434	1.45559	1.27025	1.20884	-0.842587	0.358731	-0.660791	0.418465	0.598832	0.722658	-0.537745	-0.477896	0.603988	0.72401	-0.475971
1.477	1.01053	0.897194	1.28317	-0.574076	-3.6256	-3.42939	-0.685754	0.0455344	-0.915343	-0.428282	1.01054	1.51517	1.44484	2.04046	1.45221	1.26685	1.20545	-0.848267	0.353138	-0.667127	0.412916	0.593415	0.717328	-0.543994	-0.484102	0.598571	0.718681	-0.482177
1.478	1.00626	0.89283	1.27909	-0.579489	-3.63323	-3.43689	-0.691254	0.0405573	-0.921018	-0.433608	1.007	1.51191	1.44154	2.03751	1.44883	1.26346	1.20206	-0.853947	0.347545	-0.673464	0.407367	0.587997	0.711998	-0.550243	-0.490308	0.593153	0.713351	-0.488383
1.479	1.00199	0.888466	1.27501	-0.584903	-3.64086	-3.4444	-0.696755	0.0355803	-0.926692	-0.438934	1.00346	1.50865	1.43823	2.03457	1.44545	1.26006	1.19867	-0.859628	0.341952	-0.6798	0.401818	0.58258	0.706669	-0.556492	-0.496513	0.587736	0.708021	-0.494589
1.48	0.997715	0.884102	1.27093	-0.590316	-3.64849	-3.4519	-0.702255	0.0306032	-0.932366	-0.44426	0.99992	1.50539	1.43493	2.03162	1.44207	1.25667	1.19529	-0.865308	0.336359	-0.686137	0.396269	0.577162	0.701339	-0.562741	-0.502719	0.582318	0.702691	-0.500795
1.481	0.993443	0.879738	1.26685	-0.59573	-3.65612	-3.4594	-0.707756	0.0256262	-0.938041	-0.449587	0.99638	1.50213	1.43162	2.02868	1.43869	1.25327	1.1919	-0.870988	0.330766	-0.692473	0.390719	0.571745	0.696009	-0.56899	-0.508924	0.576901	0.697362	-0.507
1.482	0.98917	0.875373	1.26277	-0.601143	-3.66375	-3.46691	-0.713256	0.0206491	-0.943715	-0.454913	0.99284	1.49887	1.42832	2.02573	1.43531	1.24988	1.18851	-0.876669	0.325173	-0.69881	0.38517	0.566327	0.690679	-0.57524	-0.51513	0.571483	0.692032	-0.513206
1.483	0.984898	0.871009	1.25869	-0.606556	-3.67138	-3.47441	-0.718757	0.0156721	-0.949389	-0.460239	0.989299	1.49561	1.42501	2.02279	1.43193	1.24648	1.18512	-0.882349	0.31958	-0.705146	0.379621	0.56091	0.68535	-0.581489	-0.521335	0.566066	0.686702	-0.519412
1.484	0.980626	0.866645	1.25461	-0.61197	-3.67901	-3.48192	-0.724257	0.010695	-0.955064	-0.465566	0.985759	1.49235	1.4217	2.01984	1.42855	1.24309	1.18174	-0.888029	0.313988	-0.711483	0.374072	0.555492	0.68002	-0.587738	-0.527541	0.560648	0.681373	-0.525617
1.485	0.976354	0.862281	1.25053	-0.617383	-3.68664	-3.48942	-0.729757	0.00571794	-0.960738	-0.470892	0.982218	1.48909	1.4184	2.0169	1.42517	1.23969	1.17835	-0.89371	0.308395	-0.71782	0.368523	0.550075	0.67469	-0.593987	-0.533747	0.555231	0.676043	-0.531823
1.486	0.972082	0.857917	1.24645	-0.622797	-3.69427	-3.49692	-0.735258	0.00074089	-0.966412	-0.476218	0.978678	1.48583	1.41509	2.01395	1.42179	1.2363	1.17496	-0.89939	0.302802	-0.724156	0.362974	0.544657	0.66936	-0.600236	-0.539952	0.549813	0.670713	-0.538029
1.487	0.967809	0.853552	1.24237	-0.62821	-3.7019	-3.50443	-0.740758	-0.0042362	-0.972087	-0.481544	0.975137	1.48257	1.41179	2.01101	1.41841	1.2329	1.17157	-0.90507	0.297209	-0.730492	0.357425	0.53924	0.66403	-0.606485	-0.546158	0.544396	0.665384	-0.544235
1.488	0.963537	0.849188	1.23829	-0.633624	-3.70953	-3.51193	-0.746259	-0.0092132	-0.977761	-0.486871	0.971597	1.47931	1.40848	2.00806	1.41503	1.22951	1.16819	-0.91075	0.291616	-0.736829	0.351876	0.533822	0.658701	-0.612734	-0.552363	0.538978	0.660054	-0.55044
1.489	0.959265	0.844824	1.23421	-0.639037	-3.71716	-3.51944	-0.751759	-0.0141903	-0.983435	-0.492197	0.968057	1.47605	1.40518	2.00512	1.41165	1.22611	1.1648	-0.916431	0.286023	-0.743166	0.346327	0.528405	0.653371	-0.618983	-0.558569	0.533561	0.654724	-0.556646
1.49	0.954993	0.84046	1.23013	-0.644451	-3.72479	-3.52694	-0.75726	-0.0191673	-0.98911	-0.497523	0.964516	1.47279	1.40187	2.00217	1.40827	1.22272	1.16141	-0.922111	0.28043	-0.749502	0.340778	0.522987	0.648041	-0.625232	-0.564775	0.528143	0.649394	-0.562852
1.491	0.950721	0.836096	1.22605	-0.649864	-3.73242	-3.53445	-0.76276	-0.0241444	-0.994784	-0.50285	0.960976	1.46953	1.39856	1.99923	1.40489	1.21932	1.15802	-0.927791	0.274838	-0.755839	0.335229	0.51757	0.642711	-0.631482	-0.57098	0.522726	0.644065	-0.569058
1.492	0.946448	0.831731	1.22198	-0.655278	-3.74005	-3.54195	-0.768261	-0.0291215	-1.00046	-0.508176	0.957435	1.46627	1.39526	1.99628	1.40151	1.21593	1.15464	-0.933471	0.269245	-0.762175	0.32968	0.512152	0.637382	-0.637731	-0.577186	0.517309	0.638735	-0.575263
1.493	0.942176	0.827367	1.2179	-0.660691	-3.74768	-3.54945	-0.773761	-0.0340985	-1.00613	-0.513502	0.953895	1.46301	1.39195	1.99334	1.39813	1.21253	1.15125	-0.939152	0.263652	-0.768512	0.324131	0.506735	0.632052	-0.64398	-0.583391	0.511891	0.633405	-0.581469
1.494	0.937904	0.823003	1.21382	-0.666104	-3.75531	-3.55696	-0.779262	-0.0390756	-1.01181	-0.518829	0.950354	1.45975	1.38865	1.99039	1.39475	1.20914	1.14786	-0.944832	0.258059	-0.774848	0.318582	0.501317	0.626722	-0.650229	-0.589597	0.506474	0.628076	-0.587675
1.495	0.933632	0.818639	1.20974	-0.671518	-3.76294	-3.56446	-0.784762	-0.0440526	-1.01748	-0.524155	0.946814	1.45649	1.38534	1.98745	1.39137	1.20575	1.14447	-0.950512	0.252466	-0.781185	0.313033	0.4959	0.621392	-0.656478	-0.595803	0.501056	0.622746	-0.593881
1.496	0.92936	0.814275	1.20566	-0.676931	-3.77057	-3.57197	-0.790262	-0.0490297	-1.02316	-0.529481	0.943273	1.45323	1.38204	1.9845	1.38799	1.20235	1.14109	-0.956193	0.246873	-0.787521	0.307484	0.490482	0.616062	-0.662727	-0.602008	0.495639	0.617416	-0.600086
1.497	0.925088	0.80991	1.20158	-0.682345	-3.7782	-3.57947	-0.795763	-0.0540068	-1.02883	-0.534807	0.939733	1.44997	1.37873	1.98156	1.38461	1.19896	1.1377	-0.961873	0.24128	-0.793858	0.301935	0.485065	0.610733	-0.668976	-0.608214	0.490221	0.612087	-0.606292
1.498	0.920815	0.805546	1.1975	-0.687758	-3.78583	-3.58697	-0.801263	-0.0589838	-1.0345	-0.540134	0.936193	1.44671	1.37542	1.97861	1.38123	1.19556	1.13431	-0.967553	0.235687	-0.800194	0.296386	0.479647	0.605403	-0.675225	-0.614419	0.484804	0.606757	-0.612498
1.499	0.916543	0.801182	1.19342	-0.693172	-3.79346	-3.59448	-0.806764	-0.0639609	-1.04018	-0.54546	0.932652	1.44345	1.37212	1.97566	1.37785	1.19217	1.13092	-0.973233	0.230095	-0.806531	0.290837	0.47423	0.600073	-0.681474	-0.620625	0.479386	0.601427	-0.618704
1.5	0.912271	0.796818	1.18934	-0.698585	-3.80108	-3.60198	-0.812264	-0.0689379	-1.04585	-0.550786	0.929112	1.44019	1.36881	1.97272	1.37447	1.18877	1.12754	-0.978914	0.224502	-0.812867	0.285288	0.468812	0.594743	-0.687723	-0.62683	0.473969	0.596097	-0.624909
1.501	0.907999	0.792454	1.18526	-0.703999	-3.80871	-3.60949	-0.817765	-0.073915	-1.05153	-0.556113	0.925571	1.43693	1.36551	1.96977	1.37109	1.18538	1.12415	-0.984594	0.218909	-0.819204	0.279739	0.463395	0.589414	-0.693972	-0.633036	0.468551	0.590768	-0.631115
1.502	0.903727	0.788089	1.18118	-0.709412	-3.81634	-3.61699	-0.823265	-0.078892	-1.0572	-0.561439	0.922031	1.43367	1.3622	1.96683	1.36771	1.18198	1.12076	-0.990274	0.213316	-0.82554	0.27419	0.457977	0.584084	-0.700222	-0.639242	0.463134	0.585438	-0.637321
1.503	0.899454	0.783725	1.1771	-0.714826	-3.82397	-3.6245	-0.828766	-0.0838691	-1.06288	-0.566765	0.91849	1.43041	1.3589	1.96388	1.36433	1.17859	1.11737	-0.995954	0.207723	-0.831877	0.268641	0.45256	0.578754	-0.706471	-0.645447	0.457716	0.580108	-0.643527
1.504	0.895182	0.779361	1.17302	-0.720239	-3.8316	-3.632	-0.834266	-0.0888462	-1.06855	-0.572092	0.91495	1.42715	1.35559	1.96094	1.36095	1.17519	1.11399	-1.00163	0.20213	-0.838213	0.263092	0.447142	0.573424	-0.71272	-0.651653	0.452299	0.574779	-0.649732
1.505	0.89091	0.774997	1.16894	-0.725653	-3.83923	-3.6395	-0.839766	-0.0938232	-1.07422	-0.577418	0.911409	1.42389	1.35229	1.95799	1.35757	1.1718	1.1106	-1.00731	0.196537	-0.84455	0.257543	0.441725	0.568094	-0.718969	-0.657858	0.446881	0.569449	-0.655938
1.506	0.886638	0.770633	1.16486	-0.731066	-3.84686	-3.64701	-0.845267	-0.0988003	-1.0799	-0.582744	0.907869	1.42063	1.34898	1.95505	1.35419	1.1684	1.10721	-1.013	0.190945	-0.850886	0.251994	0.436307	0.562765	-0.725218	-0.664064	0.441464	0.564119	-0.662144
1.507	0.882366	0.766268	1.16078	-0.736479	-3.85449	-3.65451	-0.850767	-0.103777	-1.08557	-0.588071	0.904328	1.41737	1.34567	1.9521	1.35081	1.16501	1.10382	-1.01868	0.185352	-0.857223	0.246445	0.43089	0.557435	-0.731467	-0.670269	0.436046	0.55879	-0.66835
1.508	0.878093	0.761904	1.1567	-0.741893	-3.86212	-3.66202	-0.856268	-0.108754	-1.09125	-0.593397	0.900788	1.41411	1.34237	1.94915	1.34743	1.16161	1.10044	-1.02436	0.179759	-0.86356	0.240896	0.425472	0.552105	-0.737716	-0.676475	0.430629	0.55346	-0.674555
1.509	0.873821	0.75754	1.15262	-0.747306	-3.86975	-3.66952	-0.861768	-0.113731	-1.09692	-0.598723	0.897248	1.41085	1.33906	1.94621	1.34405	1.15822	1.09705	-1.03004	0.174166	-0.869896	0.235347	0.420055	0.546775	-0.743965	-0.682681	0.425211	0.54813	-0.680761
1.51	0.869549	0.753176	1.14854	-0.75272	-3.87738	-3.67703	-0.867269	-0.118708	-1.1026	-0.604049	0.893707	1.40758	1.33576	1.94326	1.34067	1.15482	1.09366	-1.03572	0.168573	-0.876232	0.229798	0.414637	0.541445	-0.750215	-0.688886	0.419794	0.5428	-0.686967
1.511	0.865277	0.748812	1.14446	-0.758133	-3.88501	-3.68453	-0.872769	-0.123686	-1.10827	-0.609376	0.890167	1.40432	1.33245	1.94032	1.33729	1.15143	1.09027	-1.0414	0.16298	-0.882569	0.224249	0.40922	0.536116	-0.756464	-0.695092	0.414376	0.537471	-0.693172
1.512	0.861005	0.744447	1.14039	-0.763547	-3.89264	-3.69203	-0.87827	-0.128663	-1.11395	-0.614702	0.886626	1.40106	1.32915	1.93737	1.33391	1.14803	1.08689	-1.04708	0.157387	-0.888906	0.2187	0.403802	0.530786	-0.762713	-0.701297	0.408959	0.532141	-0.699378
1.513	0.856732	0.740083	1.13631	-0.76896	-3.90027	-3.69954	-0.88377	-0.13364	-1.11962	-0.620028	0.883086	1.3978	1.32584	1.93443	1.33053	1.14464	1.0835	-1.05276	0.151794	-0.895242	0.21315	0.398385	0.525456	-0.768962	-0.707503	0.403541	0.526811	-0.705584
1.514	0.85246	0.735719	1.13223	-0.774374	-3.9079	-3.70704	-0.88927	-0.138617	-1.12529	-0.625355	0.879545	1.39454	1.32253	1.93148	1.32715	1.14124	1.08011	-1.05844	0.146202	-0.901579	0.207601	0.392967	0.520126	-0.775211	-0.713708	0.398124	0.521482	-0.71179
1.515	0.848188	0.731355	1.12815	-0.779787	-3.91553	-3.71455	-0.894771	-0.143594	-1.13097	-0.630681	0.876005	1.39128	1.31923	1.92853	1.32377	1.13785	1.07672	-1.06412	0.140609	-0.907915	0.202052	0.38755	0.514797	-0.78146	-0.719914	0.392706	0.516152	-0.717995
1.516	0.843916	0.726991	1.12407	-0.785201	-3.92316	-3.72205	-0.900271	-0.148571	-1.13664	-0.636007	0.872464	1.38802	1.31592	1.92559	1.32039	1.13445	1.07334	-1.0698	0.135016	-0.914252	0.196503	0.382132	0.509467	-0.787709	-0.72612	0.387289	0.510822	-0.724201
1.517	0.839644	0.722626	1.11999	-0.790614	-3.93079	-3.72955	-0.905772	-0.153548	-1.14232	-0.641333	0.868924	1.38476	1.31262	1.92264	1.317	1.13106	1.06995	-1.07548	0.129423	-0.920588	0.190954	0.376715	0.504137	-0.793958	-0.732325	0.381871	0.505492	-0.730407
1.518	0.835372	0.718262	1.11591	-0.796028	-3.93842	-3.73706	-0.911272	-0.158525	-1.14799	-0.64666	0.865383	1.3815	1.30931	1.9197	1.31362	1.12766	1.06656	-1.08116	0.12383	-0.926925	0.185405	0.371298	0.498807	-0.800207	-0.738531	0.376454	0.500163	-0.736613
1.519	0.831099	0.713898	1.11183	-0.801441	-3.94605	-3.74456	-0.916773	-0.163502	-1.15367	-0.651986	0.861843	1.37824	1.306	1.91675	1.31024	1.12427	1.06317	-1.08684	0.118237	-0.933261	0.179856	0.36588	0.493477	-0.806456	-0.744736	0.371036	0.494833	-0.742818
1.52	0.826827	0.709534	1.10775	-0.806855	-3.95368	-3.75207	-0.922273	-0.168479	-1.15934	-0.657312	0.858302	1.37498	1.3027	1.9138	1.30686	1.12087	1.05979	-1.09252	0.112644	-0.939598	0.174307	0.360463	0.488148	-0.812705	-0.750942	0.365619	0.489503	-0.749024
1.521	0.822555	0.70517	1.10367	-0.812268	-3.96131	-3.75957	-0.927774	-0.173456	-1.16501	-0.662639	0.854762	1.37172	1.29939	1.91086	1.30348	1.11748	1.0564	-1.0982	0.107052	-0.945934	0.168758	0.355045	0.482818	-0.818955	-0.757147	0.360201	0.484174	-0.75523
1.522	0.818283	0.700805	1.09959	-0.817681	-3.96894	-3.76708	-0.933274	-0.178433	-1.17069	-0.667965	0.851221	1.36846	1.29609	1.90791	1.3001	1.11408	1.05301	-1.10388	0.101459	-0.952271	0.163209	0.349628	0.477488	-0.825204	-0.763353	0.354784	0.478844	-0.761436
1.523	0.814011	0.696441	1.09551	-0.823095	-3.97657	-3.77458	-0.938774	-0.18341	-1.17636	-0.673291	0.847681	1.3652	1.29278	1.90497	1.29672	1.11069	1.04962	-1.10956	0.0958658	-0.958607	0.15766	0.34421	0.472158	-0.831453	-0.769559	0.349366	0.473514	-0.767641
1.524	0.809738	0.692077	1.09143	-0.828508	-3.9842	-3.78208	-0.944275	-0.188387	-1.18204	-0.678617	0.84414	1.36194	1.28948	1.90202	1.29334	1.10729	1.04624	-1.11524	0.0902729	-0.964944	0.152111	0.338793	0.466829	-0.837702	-0.775764	0.343949	0.468185	-0.773847
1.525	0.805466	0.687713	1.08735	-0.833922	-3.99183	-3.78959	-0.949775	-0.193364	-1.18771	-0.683944	0.8406	1.35868	1.28617	1.89907	1.28996	1.1039	1.04285	-1.12092	0.0846801	-0.97128	0.146562	0.333375	0.461499	-0.843951	-0.78197	0.338531	0.462855	-0.780053
1.526	0.801194	0.683349	1.08327	-0.839335	-3.99946	-3.79709	-0.955276	-0.198341	-1.19339	-0.68927	0.837059	1.35542	1.28286	1.89613	1.28658	1.1005	1.03946	-1.1266	0.0790872	-0.977617	0.141013	0.327958	0.456169	-0.8502	-0.788176	0.333114	0.457525	-0.786259
1.527	0.796922	0.678984	1.07919	-0.844749	-4.00709	-3.8046	-0.960776	-0.203319	-1.19906	-0.694596	0.833519	1.35216	1.27956	1.89318	1.2832	1.09711	1.03607	-1.13228	0.0734943	-0.983953	0.135464	0.32254	0.450839	-0.856449	-0.794381	0.327696	0.452195	-0.792464
1.528	0.79265	0.67462	1.07511	-0.850162	-4.01472	-3.8121	-0.966277	-0.208296	-1.20473	-0.699923	0.829979	1.3489	1.27625	1.89023	1.27982	1.09371	1.03269	-1.13796	0.0679015	-0.99029	0.129915	0.317123	0.445509	-0.862698	-0.800587	0.322279	0.446866	-0.79867
1.529	0.788377	0.670256	1.07103	-0.855576	-4.02235	-3.8196	-0.971777	-0.213273	-1.21041	-0.705249	0.826438	1.34564	1.27295	1.88729	1.27644	1.09032	1.0293	-1.14364	0.0623086	-0.996626	0.124366	0.311705	0.44018	-0.868947	-0.806792	0.316861	0.441536	-0.804876
1.53	0.784105	0.665892	1.06695	-0.860989	-4.02998	-3.82711	-0.977278	-0.21825	-1.21608	-0.710575	0.822898	1.34238	1.26964	1.88434	1.27306	1.08692	1.02591	-1.14932	0.0567157	-1.00296	0.118817	0.306288	0.43485	-0.875197	-0.812998	0.311444	0.436206	-0.811082
1.531	0.779833	0.661528	1.06288	-0.866403	-4.03761	-3.83461	-0.982778	-0.223227	-1.22176	-0.715902	0.819357	1.33912	1.26634	1.8814	1.26968	1.08353	1.02252	-1.155	0.0511228	-1.0093	0.113268	0.30087	0.42952	-0.881446	-0.819203	0.306026	0.430877	-0.817287
1.532	0.775561	0.657163	1.0588	-0.871816	-4.04524	-3.84212	-0.988278	-0.228204	-1.22743	-0.721228	0.815817	1.33586	1.26303	1.87845	1.2663	1.08013	1.01913	-1.16068	0.04553	-1.01564	0.107719	0.295453	0.42419	-0.887695	-0.825409	0.300609	0.425547	-0.823493
1.533	0.771289	0.652799	1.05472	-0.87723	-4.05287	-3.84962	-0.993779	-0.233181	-1.23311	-0.726554	0.812276	1.3326	1.25972	1.8755	1.26292	1.07674	1.01575	-1.16636	0.0399371	-1.02197	0.10217	0.290035	0.418861	-0.893944	-0.831615	0.295191	0.420217	-0.829699
1.534	0.767016	0.648435	1.05064	-0.882643	-4.0605	-3.85713	-0.999279	-0.238158	-1.23878	-0.731881	0.808736	1.32934	1.25642	1.87256	1.25954	1.07334	1.01236	-1.17204	0.0343442	-1.02831	0.0966208	0.284618	0.413531	-0.900193	-0.83782	0.289774	0.414888	-0.835905
1.535	0.762744	0.644071	1.04656	-0.888057	-4.06813	-3.86463	-1.00478	-0.243135	-1.24446	-0.737207	0.805195	1.32608	1.25311	1.86961	1.25616	1.06995	1.00897	-1.17772	0.0287514	-1.03465	0.0910718	0.2792	0.408201	-0.906442	-0.844026	0.284356	0.409558	-0.84211
1.536	0.758472	0.639707	1.04248	-0.89347	-4.07576	-3.87213	-1.01028	-0.248112	-1.25013	-0.742533	0.801655	1.32282	1.24981	1.86666	1.25278	1.06655	1.00558	-1.1834	0.0231585	-1.04098	0.0855228	0.273783	0.402871	-0.912691	-0.850231	0.278939	0.404228	-0.848316
1.537	0.7542	0.635342	1.0384	-0.898883	-4.08339	-3.87964	-1.01578	-0.253089	-1.2558	-0.747859	0.798114	1.31956	1.2465	1.86372	1.2494	1.06316	1.0022	-1.18908	0.0175656	-1.04732	0.0799737	0.268365	0.397541	-0.91894	-0.856437	0.273521	0.398898	-0.854522
1.538	0.749928	0.630978	1.03432	-0.904297	-4.09102	-3.88714	-1.02128	-0.258066	-1.26148	-0.753186	0.794574	1.3163	1.24319	1.86077	1.24602	1.05976	0.998809	-1.19476	0.0119728	-1.05366	0.0744247	0.262948	0.392212	-0.925189	-0.862642	0.268104	0.393569	-0.860727
1.539	0.745656	0.626614	1.03024	-0.90971	-4.09865	-3.89465	-1.02678	-0.263043	-1.26715	-0.758512	0.791033	1.31304	1.23989	1.85782	1.24264	1.05637	0.995421	-1.20044	0.00637991	-1.05999	0.0688757	0.25753	0.386882	-0.931438	-0.868848	0.262686	0.388239	-0.866933
1.54	0.741383	0.62225	1.02616	-0.915124	-4.10628	-3.90215	-1.03228	-0.26802	-1.27283	-0.763838	0.787493	1.30978	1.23658	1.85488	1.23926	1.05297	0.992034	-1.20612	0.00078704	-1.06633	0.0633266	0.252113	0.381552	-0.937688	-0.875054	0.257269	0.382909	-0.873139
1.541	0.737111	0.617886	1.02208	-0.920537	-4.11391	-3.90965	-1.03778	-0.272997	-1.2785	-0.769165	0.783952	1.30652	1.23328	1.85193	1.23588	1.04958	0.988646	-1.21181	-0.0048058	-1.07266	0.0577776	0.246695	0.376222	-0.943937	-0.881259	0.251851	0.37758	-0.879345
1.542	0.732839	0.613521	1.018	-0.925951	-4.12154	-3.91716	-1.04328	-0.277974	-1.28418	-0.774491	0.780412	1.30325	1.22997	1.84898	1.2325	1.04618	0.985259	-1.21749	-0.0103987	-1.079	0.0522286	0.241278	0.370893	-0.950186	-0.887465	0.246434	0.37225	-0.88555
1.543	0.728567	0.609157	1.01392	-0.931364	-4.12917	-3.92466	-1.04878	-0.282951	-1.28985	-0.779817	0.776871	1.29999	1.22667	1.84604	1.22912	1.04279	0.981871	-1.22317	-0.0159916	-1.08534	0.0466796	0.23586	0.365563	-0.956435	-0.89367	0.241016	0.36692	-0.891756
1.544	0.724295	0.604793	1.00984	-0.936778	-4.1368	-3.93217	-1.05428	-0.287928	-1.29552	-0.785143	0.773331	1.29673	1.22336	1.84309	1.22574	1.03939	0.978483	-1.22885	-0.0215844	-1.09167	0.0411305	0.230443	0.360233	-0.962684	-0.899876	0.235599	0.36159	-0.897962
1.545	0.720022	0.600429	1.00576	-0.942191	-4.14443	-3.93967	-1.05978	-0.292906	-1.3012	-0.79047	0.76979	1.29347	1.22005	1.84014	1.22236	1.036	0.975096	-1.23453	-0.0271773	-1.09801	0.0355815	0.225025	0.354903	-0.968933	-0.906081	0.230181	0.356261	-0.904168
1.546	0.71575	0.596065	1.00168	-0.947605	-4.15206	-3.94718	-1.06528	-0.297883	-1.30687	-0.795796	0.76625	1.29021	1.21675	1.8372	1.21898	1.0326	0.971708	-1.24021	-0.0327702	-1.10435	0.0300325	0.219608	0.349573	-0.975182	-0.912287	0.224764	0.350931	-0.910373
1.547	0.711478	0.5917	0.997604	-0.953018	-4.15969	-3.95468	-1.07079	-0.30286	-1.31255	-0.801122	0.762709	1.28695	1.21344	1.83425	1.21559	1.02921	0.96832	-1.24589	-0.038363	-1.11068	0.0244834	0.21419	0.344244	-0.981431	-0.918493	0.219346	0.345601	-0.916579
1.548	0.707206	0.587336	0.993524	-0.958431	-4.16732	-3.96218	-1.07629	-0.307837	-1.31822	-0.806449	0.759169	1.28369	1.21014	1.8313	1.21221	1.02581	0.964933	-1.25157	-0.0439559	-1.11702	0.0189344	0.208773	0.338914	-0.98768	-0.924698	0.213929	0.340272	-0.922785
1.549	0.702934	0.582972	0.989445	-0.963845	-4.17495	-3.96969	-1.08179	-0.312814	-1.3239	-0.811775	0.755628	1.28043	1.20683	1.82836	1.20883	1.02242	0.961545	-1.25725	-0.0495488	-1.12336	0.0133854	0.203355	0.333584	-0.99393	-0.930904	0.208511	0.334942	-0.928991
1.55	0.698661	0.578608	0.985365	-0.969258	-4.18258	-3.97719	-1.08729	-0.317791	-1.32957	-0.817101	0.752088	1.27717	1.20352	1.82541	1.20545	1.01902	0.958158	-1.26293	-0.0551416	-1.12969	0.00783633	0.197938	0.328254	-1.00018	-0.937109	0.203094	0.329612	-0.935196
1.551	0.694389	0.574244	0.981286	-0.974672	-4.19021	-3.9847	-1.09279	-0.322768	-1.33524	-0.822427	0.748547	1.27391	1.20022	1.82246	1.20207	1.01563	0.95477	-1.26861	-0.0607345	-1.13603	0.0022873	0.19252	0.322925	-1.00643	-0.943315	0.197676	0.324283	-0.941402
1.552	0.690117	0.569879	0.977206	-0.980085	-4.19784	-3.9922	-1.09829	-0.327745	-1.34092	-0.827754	0.745006	1.27065	1.19691	1.81952	1.19869	1.01223	0.951382	-1.27429	-0.0663274	-1.14237	-0.0032617	0.187103	0.317595	-1.01268	-0.94952	0.192259	0.318953	-0.947608
1.553	0.685845	0.565515	0.973127	-0.985499	-4.20547	-3.9997	-1.10379	-0.332722	-1.34659	-0.83308	0.741466	1.26739	1.19361	1.81657	1.19531	1.00884	0.947995	-1.27997	-0.0719202	-1.1487	-0.0088108	0.181685	0.312265	-1.01893	-0.955726	0.186841	0.313623	-0.953814
1.554	0.681573	0.561151	0.969047	-0.990912	-4.2131	-4.00721	-1.10929	-0.337699	-1.35227	-0.838406	0.737925	1.26413	1.1903	1.81362	1.19193	1.00544	0.944607	-1.28565	-0.0775131	-1.15504	-0.0143598	0.176268	0.306935	-1.02518	-0.961932	0.181424	0.308293	-0.960019
1.555	0.6773	0.556787	0.964968	-0.996326	-4.22073	-4.01471	-1.11479	-0.342676	-1.35794	-0.843733	0.734385	1.26087	1.18699	1.81068	1.18855	1.00205	0.941219	-1.29133	-0.083106	-1.16138	-0.0199088	0.17085	0.301605	-1.03142	-0.968137	0.176006	0.302964	-0.966225
1.556	0.673028	0.552423	0.960888	-1.00174	-4.22836	-4.02222	-1.12029	-0.347653	-1.36362	-0.849059	0.730844	1.25761	1.18369	1.80773	1.18517	0.998652	0.937832	-1.29701	-0.0886988	-1.16771	-0.0254579	0.165433	0.296276	-1.03767	-0.974343	0.170589	0.297634	-0.972431
1.557	0.668756	0.548058	0.956809	-1.00715	-4.23599	-4.02972	-1.12579	-0.35263	-1.36929	-0.854385	0.727304	1.25435	1.18038	1.80478	1.18179	0.995257	0.934444	-1.30269	-0.0942917	-1.17405	-0.0310069	0.160015	0.290946	-1.04392	-0.980548	0.165171	0.292304	-0.978637
1.558	0.664484	0.543694	0.952729	-1.01257	-4.24362	-4.03723	-1.13129	-0.357607	-1.37496	-0.859712	0.723763	1.25109	1.17708	1.80184	1.17841	0.991862	0.931056	-1.30837	-0.0998846	-1.18039	-0.0365559	0.154598	0.285616	-1.05017	-0.986754	0.159754	0.286975	-0.984842
1.559	0.660212	0.53933	0.94865	-1.01798	-4.25125	-4.04473	-1.13679	-0.362584	-1.38064	-0.865038	0.720223	1.24783	1.17377	1.79889	1.17503	0.988467	0.927669	-1.31405	-0.105477	-1.18672	-0.042105	0.14918	0.280286	-1.05642	-0.99296	0.154337	0.281645	-0.991048
1.56	0.65594	0.534966	0.94457	-1.02339	-4.25888	-4.05223	-1.14229	-0.367561	-1.38631	-0.870364	0.716682	1.24457	1.17046	1.79594	1.17165	0.985072	0.924281	-1.31973	-0.11107	-1.19306	-0.047654	0.143763	0.274957	-1.06267	-0.999165	0.148919	0.276315	-0.997254
1.561	0.651667	0.530601	0.940491	-1.02881	-4.26651	-4.05974	-1.14779	-0.372538	-1.39199	-0.875691	0.713142	1.24131	1.16716	1.79299	1.16827	0.981677	0.920893	-1.32541	-0.116663	-1.1994	-0.053203	0.138345	0.269627	-1.06892	-1.00537	0.143502	0.270986	-1.00346
1.562	0.647395	0.526237	0.936411	-1.03422	-4.27414	-4.06724	-1.15329	-0.377516	-1.39766	-0.881017	0.709601	1.23805	1.16385	1.79005	1.16489	0.978282	0.917506	-1.33109	-0.122256	-1.20573	-0.058752	0.132928	0.264297	-1.07517	-1.01158	0.138084	0.265656	-1.00967
1.563	0.643123	0.521873	0.932332	-1.03963	-4.28177	-4.07475	-1.15879	-0.382493	-1.40334	-0.886343	0.706061	1.23479	1.16055	1.7871	1.16151	0.974887	0.914118	-1.33677	-0.127849	-1.21207	-0.0643011	0.12751	0.258967	-1.08142	-1.01778	0.132667	0.260326	-1.01587
1.564	0.638851	0.517509	0.928252	-1.04505	-4.28939	-4.08225	-1.16429	-0.38747	-1.40901	-0.891669	0.70252	1.23153	1.15724	1.78415	1.15813	0.971492	0.91073	-1.34245	-0.133442	-1.2184	-0.0698501	0.122093	0.253637	-1.08767	-1.02399	0.127249	0.254996	-1.02208
1.565	0.634579	0.513145	0.924173	-1.05046	-4.29702	-4.08976	-1.16979	-0.392447	-1.41469	-0.896996	0.69898	1.22826	1.15394	1.78121	1.15475	0.968097	0.907343	-1.34813	-0.139035	-1.22474	-0.0753991	0.116675	0.248308	-1.09392	-1.03019	0.121832	0.249667	-1.02828
1.566	0.630306	0.50878	0.920094	-1.05587	-4.30465	-4.09726	-1.17529	-0.397424	-1.42036	-0.902322	0.695439	1.225	1.15063	1.77826	1.15137	0.964702	0.903955	-1.35381	-0.144627	-1.23108	-0.0809482	0.111258	0.242978	-1.10016	-1.0364	0.116414	0.244337	-1.03449
1.567	0.626034	0.504416	0.916014	-1.06129	-4.31228	-4.10476	-1.18079	-0.402401	-1.42603	-0.907648	0.691899	1.22174	1.14732	1.77531	1.14799	0.961307	0.900567	-1.35949	-0.15022	-1.23741	-0.0864972	0.10584	0.237648	-1.10641	-1.0426	0.110997	0.239007	-1.04069
1.568	0.621762	0.500052	0.911935	-1.0667	-4.31991	-4.11227	-1.18629	-0.407378	-1.43171	-0.912975	0.688358	1.21848	1.14402	1.77236	1.14461	0.957912	0.89718	-1.36517	-0.155813	-1.24375	-0.0920462	0.100423	0.232318	-1.11266	-1.04881	0.105579	0.233678	-1.0469
1.569	0.61749	0.495688	0.907855	-1.07211	-4.32754	-4.11977	-1.19179	-0.412355	-1.43738	-0.918301	0.684818	1.21522	1.14071	1.76942	1.14123	0.954517	0.893792	-1.37085	-0.161406	-1.25009	-0.0975953	0.0950054	0.226989	-1.11891	-1.05502	0.100162	0.228348	-1.05311
1.57	0.613218	0.491324	0.903776	-1.07753	-4.33517	-4.12728	-1.1973	-0.417332	-1.44306	-0.923627	0.681277	1.21196	1.13741	1.76647	1.13784	0.951122	0.890404	-1.37653	-0.166999	-1.25642	-0.103144	0.0895879	0.221659	-1.12516	-1.06122	0.0947441	0.223018	-1.05931
1.571	0.608945	0.486959	0.899696	-1.08294	-4.3428	-4.13478	-1.2028	-0.422309	-1.44873	-0.928953	0.677737	1.2087	1.1341	1.76352	1.13446	0.947727	0.887017	-1.38221	-0.172592	-1.26276	-0.108693	0.0841704	0.216329	-1.13141	-1.06743	0.0893266	0.217689	-1.06552
1.572	0.604673	0.482595	0.895617	-1.08835	-4.35043	-4.14228	-1.2083	-0.427286	-1.45441	-0.93428	0.674196	1.20544	1.13079	1.76058	1.13108	0.944332	0.883629	-1.38789	-0.178185	-1.2691	-0.114242	0.0787529	0.210999	-1.13766	-1.07363	0.0839091	0.212359	-1.07172
1.573	0.600401	0.478231	0.891537	-1.09377	-4.35806	-4.14979	-1.2138	-0.432263	-1.46008	-0.939606	0.670655	1.20218	1.12749	1.75763	1.1277	0.940937	0.880241	-1.39357	-0.183778	-1.27543	-0.119791	0.0733354	0.205669	-1.14391	-1.07984	0.0784916	0.207029	-1.07793
1.574	0.596129	0.473867	0.887458	-1.09918	-4.36569	-4.15729	-1.2193	-0.43724	-1.46575	-0.944932	0.667115	1.19892	1.12418	1.75468	1.12432	0.937542	0.876854	-1.39925	-0.18937	-1.28177	-0.12534	0.0679179	0.20034	-1.15016	-1.08604	0.0730741	0.201699	-1.08413
1.575	0.591857	0.469503	0.883378	-1.10459	-4.37332	-4.1648	-1.2248	-0.442217	-1.47143	-0.950259	0.663574	1.19566	1.12088	1.75173	1.12094	0.934147	0.873466	-1.40493	-0.194963	-1.28811	-0.130889	0.0625004	0.19501	-1.15641	-1.09225	0.0676566	0.19637	-1.09034
1.576	0.587584	0.465138	0.879299	-1.11001	-4.38095	-4.1723	-1.2303	-0.447194	-1.4771	-0.955585	0.660034	1.1924	1.11757	1.74879	1.11756	0.930752	0.870078	-1.41061	-0.200556	-1.29444	-0.136438	0.057083	0.18968	-1.16266	-1.09845	0.0622392	0.19104	-1.09655
1.577	0.583312	0.460774	0.875219	-1.11542	-4.38858	-4.17981	-1.2358	-0.452171	-1.48278	-0.960911	0.656493	1.18914	1.11426	1.74584	1.11418	0.927357	0.866691	-1.4163	-0.206149	-1.30078	-0.141987	0.0516655	0.18435	-1.1689	-1.10466	0.0568217	0.18571	-1.10275
1.578	0.57904	0.45641	0.87114	-1.12084	-4.39621	-4.18731	-1.2413	-0.457149	-1.48845	-0.966237	0.652953	1.18588	1.11096	1.74289	1.1108	0.923962	0.863303	-1.42198	-0.211742	-1.30712	-0.147537	0.046248	0.17902	-1.17515	-1.11087	0.0514042	0.180381	-1.10896
1.579	0.574768	0.452046	0.86706	-1.12625	-4.40384	-4.19481	-1.2468	-0.462126	-1.49413	-0.971564	0.649412	1.18262	1.10765	1.73994	1.10742	0.920567	0.859915	-1.42766	-0.217335	-1.31345	-0.153086	0.0408305	0.173691	-1.1814	-1.11707	0.0459867	0.175051	-1.11516
1.58	0.570496	0.447682	0.862981	-1.13166	-4.41147	-4.20232	-1.2523	-0.467103	-1.4998	-0.97689	0.645872	1.17936	1.10435	1.737	1.10404	0.917172	0.856528	-1.43334	-0.222928	-1.31979	-0.158635	0.035413	0.168361	-1.18765	-1.12328	0.0405692	0.169721	-1.12137
1.581	0.566224	0.443317	0.858901	-1.13708	-4.4191	-4.20982	-1.2578	-0.47208	-1.50547	-0.982216	0.642331	1.1761	1.10104	1.73405	1.10066	0.913777	0.85314	-1.43902	-0.22852	-1.32613	-0.164184	0.0299955	0.163031	-1.1939	-1.12948	0.0351517	0.164391	-1.12757
1.582	0.561951	0.438953	0.854822	-1.14249	-4.42673	-4.21733	-1.2633	-0.477057	-1.51115	-0.987543	0.638791	1.17284	1.09773	1.7311	1.09728	0.910382	0.849752	-1.4447	-0.234113	-1.33246	-0.169733	0.024578	0.157701	-1.20015	-1.13569	0.0297342	0.159062	-1.13378
1.583	0.557679	0.434589	0.850742	-1.1479	-4.43436	-4.22483	-1.2688	-0.482034	-1.51682	-0.992869	0.63525	1.16958	1.09443	1.72816	1.0939	0.906987	0.846364	-1.45038	-0.239706	-1.3388	-0.175282	0.0191605	0.152372	-1.2064	-1.14189	0.0243167	0.153732	-1.13999
1.584	0.553407	0.430225	0.846663	-1.15332	-4.44199	-4.23233	-1.2743	-0.487011	-1.5225	-0.998195	0.63171	1.16631	1.09112	1.72521	1.09052	0.903592	0.842977	-1.45606	-0.245299	-1.34514	-0.180831	0.013743	0.147042	-1.21265	-1.1481	0.0188992	0.148402	-1.14619
1.585	0.549135	0.425861	0.842583	-1.15873	-4.44962	-4.23984	-1.2798	-0.491988	-1.52817	-1.00352	0.628169	1.16305	1.08782	1.72226	1.08714	0.900197	0.839589	-1.46174	-0.250892	-1.35147	-0.18638	0.00832552	0.141712	-1.2189	-1.1543	0.0134817	0.143073	-1.1524
1.586	0.544863	0.421496	0.838504	-1.16414	-4.45725	-4.24734	-1.2853	-0.496965	-1.53385	-1.00885	0.624629	1.15979	1.08451	1.71931	1.08376	0.896802	0.836201	-1.46742	-0.256485	-1.35781	-0.191929	0.00290803	0.136382	-1.22515	-1.16051	0.00806422	0.137743	-1.1586
1.587	0.54059	0.417132	0.834424	-1.16956	-4.46488	-4.25485	-1.2908	-0.501942	-1.53952	-1.01417	0.621088	1.15653	1.0812	1.71637	1.08038	0.893407	0.832814	-1.4731	-0.262078	-1.36414	-0.197478	-0.0025095	0.131052	-1.2314	-1.16672	0.00264673	0.132413	-1.16481
1.588	0.536318	0.412768	0.830345	-1.17497	-4.47251	-4.26235	-1.2963	-0.506919	-1.5452	-1.0195	0.617547	1.15327	1.0779	1.71342	1.077	0.890012	0.829426	-1.47878	-0.267671	-1.37048	-0.203027	-0.007927	0.125723	-1.23764	-1.17292	-0.0027708	0.127084	-1.17101
1.589	0.532046	0.408404	0.826266	-1.18038	-4.48014	-4.26986	-1.3018	-0.511896	-1.55087	-1.02483	0.614007	1.15001	1.07459	1.71047	1.07362	0.886617	0.826038	-1.48446	-0.273263	-1.37682	-0.208576	-0.0133444	0.120393	-1.24389	-1.17913	-0.0081883	0.121754	-1.17722
1.59	0.527774	0.40404	0.822186	-1.1858	-4.48777	-4.27736	-1.3073	-0.516873	-1.55654	-1.03015	0.610466	1.14675	1.07129	1.70752	1.07023	0.883222	0.822651	-1.49014	-0.278856	-1.38315	-0.214125	-0.0187619	0.115063	-1.25014	-1.18533	-0.0136057	0.116424	-1.18343
1.591	0.523502	0.399675	0.818107	-1.19121	-4.4954	-4.28486	-1.3128	-0.52185	-1.56222	-1.03548	0.606926	1.14349	1.06798	1.70458	1.06685	0.879827	0.819263	-1.49582	-0.284449	-1.38949	-0.219674	-0.0241794	0.109733	-1.25639	-1.19154	-0.0190232	0.111094	-1.18963
1.592	0.519229	0.395311	0.814027	-1.19662	-4.50303	-4.29237	-1.31831	-0.526827	-1.56789	-1.04081	0.603385	1.14023	1.06467	1.70163	1.06347	0.876432	0.815875	-1.5015	-0.290042	-1.39583	-0.225223	-0.0295969	0.104404	-1.26264	-1.19774	-0.0244407	0.105765	-1.19584
1.593	0.514957	0.390947	0.809948	-1.20204	-4.51066	-4.29987	-1.32381	-0.531804	-1.57357	-1.04613	0.599845	1.13697	1.06137	1.69868	1.06009	0.873037	0.812488	-1.50718	-0.295635	-1.40216	-0.230772	-0.0350144	0.0990738	-1.26889	-1.20395	-0.0298582	0.100435	-1.20204
1.594	0.510685	0.386583	0.805868	-1.20745	-4.51829	-4.30738	-1.32931	-0.536781	-1.57924	-1.05146	0.596304	1.13371	1.05806	1.69573	1.05671	0.869642	0.8091	-1.51286	-0.301228	-1.4085	-0.236321	-0.0404319	0.093744	-1.27514	-1.21015	-0.0352757	0.0951054	-1.20825
1.595	0.506413	0.382219	0.801789	-1.21286	-4.52592	-4.31488	-1.33481	-0.541759	-1.58492	-1.05678	0.592764	1.13045	1.05476	1.69278	1.05333	0.866247	0.805712	-1.51854	-0.306821	-1.41484	-0.24187	-0.0458494	0.0884142	-1.28139	-1.21636	-0.0406932	0.0897756	-1.21445
1.596	0.502141	0.377854	0.797709	-1.21828	-4.53355	-4.32238	-1.34031	-0.546736	-1.59059	-1.06211	0.589223	1.12719	1.05145	1.68984	1.04995	0.862852	0.802324	-1.52422	-0.312414	-1.42117	-0.247419	-0.0512669	0.0830845	-1.28764	-1.22257	-0.0461107	0.084446	-1.22066
1.597	0.497868	0.37349	0.79363	-1.22369	-4.54118	-4.32989	-1.34581	-0.551713	-1.59626	-1.06744	0.585682	1.12393	1.04814	1.68689	1.04657	0.859457	0.798937	-1.5299	-0.318006	-1.42751	-0.252968	-0.0566844	0.0777547	-1.29389	-1.22877	-0.0515282	0.0791162	-1.22687
1.598	0.493596	0.369126	0.78955	-1.2291	-4.54881	-4.33739	-1.35131	-0.55669	-1.60194	-1.07276	0.582142	1.12067	1.04484	1.68394	1.04319	0.856062	0.795549	-1.53558	-0.323599	-1.43385	-0.258517	-0.0621019	0.0724249	-1.30014	-1.23498	-0.0569457	0.0737865	-1.23307
1.599	0.489324	0.364762	0.785471	-1.23452	-4.55644	-4.3449	-1.35681	-0.561667	-1.60761	-1.07809	0.578601	1.11741	1.04153	1.68099	1.03981	0.852667	0.792161	-1.54126	-0.329192	-1.44018	-0.264066	-0.0675194	0.0670951	-1.30638	-1.24118	-0.0623632	0.0684568	-1.23928
1.6	0.485052	0.360398	0.781391	-1.23993	-4.56407	-4.3524	-1.36231	-0.566644	-1.61329	-1.08342	0.575061	1.11414	1.03823	1.67805	1.03643	0.849272	0.788774	-1.54694	-0.334785	-1.44652	-0.269615	-0.0729369	0.0617653	-1.31263	-1.24739	-0.0677807	0.0631271	-1.24548
1.601	0.48078	0.356033	0.777312	-1.24534	-4.5717	-4.35991	-1.36781	-0.571621	-1.61896	-1.08874	0.57152	1.11088	1.03492	1.6751	1.03305	0.845877	0.785386	-1.55262	-0.340378	-1.45286	-0.275164	-0.0783544	0.0564356	-1.31888	-1.25359	-0.0731982	0.0577974	-1.25169
1.602	0.476508	0.351669	0.773232	-1.25076	-4.57933	-4.36741	-1.37331	-0.576598	-1.62464	-1.09407	0.56798	1.10762	1.03161	1.67215	1.02967	0.842482	0.781998	-1.5583	-0.345971	-1.45919	-0.280713	-0.0837718	0.0511058	-1.32513	-1.2598	-0.0786157	0.0524677	-1.25789
1.603	0.472235	0.347305	0.769153	-1.25617	-4.58696	-4.37491	-1.37881	-0.581575	-1.63031	-1.09939	0.564439	1.10436	1.02831	1.6692	1.02629	0.839087	0.77861	-1.56398	-0.351564	-1.46553	-0.286262	-0.0891893	0.045776	-1.33138	-1.26601	-0.0840331	0.047138	-1.2641
1.604	0.467963	0.342941	0.765073	-1.26159	-4.59459	-4.38242	-1.38431	-0.586552	-1.63598	-1.10472	0.560899	1.1011	1.025	1.66626	1.02291	0.835692	0.775223	-1.56966	-0.357156	-1.47187	-0.291811	-0.0946068	0.0404462	-1.33763	-1.27221	-0.0894506	0.0418083	-1.27031
1.605	0.463691	0.338577	0.760994	-1.267	-4.60222	-4.38992	-1.38981	-0.591529	-1.64166	-1.11005	0.557358	1.09784	1.0217	1.66331	1.01953	0.832297	0.771835	-1.57534	-0.362749	-1.4782	-0.29736	-0.100024	0.0351164	-1.34388	-1.27842	-0.0948681	0.0364786	-1.27651
1.606	0.459419	0.334212	0.756914	-1.27241	-4.60985	-4.39743	-1.39531	-0.596506	-1.64733	-1.11537	0.553818	1.09458	1.01839	1.66036	1.01615	0.828902	0.768447	-1.58102	-0.368342	-1.48454	-0.302909	-0.105442	0.0297867	-1.35013	-1.28462	-0.100286	0.0311489	-1.28272
1.607	0.455147	0.329848	0.752835	-1.27783	-4.61748	-4.40493	-1.40081	-0.601483	-1.65301	-1.1207	0.550277	1.09132	1.01508	1.65741	1.01277	0.825507	0.76506	-1.5867	-0.373935	-1.49088	-0.308459	-0.110859	0.0244569	-1.35638	-1.29083	-0.105703	0.0258192	-1.28892
1.608	0.450874	0.325484	0.748755	-1.28324	-4.62511	-4.41243	-1.40631	-0.60646	-1.65868	-1.12603	0.546736	1.08806	1.01178	1.65446	1.00938	0.822112	0.761672	-1.59238	-0.379528	-1.49721	-0.314007	-0.116277	0.0191271	-1.36263	-1.29703	-0.111121	0.0204895	-1.29513
1.609	0.446602	0.32112	0.744676	-1.28865	-4.63274	-4.41994	-1.41181	-0.611437	-1.66436	-1.13135	0.543196	1.0848	1.00847	1.65152	1.006	0.818716	0.758284	-1.59806	-0.385121	-1.50355	-0.319557	-0.121694	0.0137973	-1.36888	-1.30324	-0.116538	0.0151598	-1.30134
1.61	0.44233	0.316756	0.740596	-1.29407	-4.64037	-4.42744	-1.41731	-0.616414	-1.67003	-1.13668	0.539655	1.08154	1.00517	1.64857	1.00262	0.815321	0.754896	-1.60374	-0.390714	-1.50988	-0.325106	-0.127112	0.00846754	-1.37512	-1.30944	-0.121956	0.00983011	-1.30754
1.611	0.438058	0.312391	0.736517	-1.29948	-4.648	-4.43495	-1.42281	-0.621391	-1.67571	-1.14201	0.536115	1.07828	1.00186	1.64562	0.999243	0.811926	0.751509	-1.60942	-0.396307	-1.51622	-0.330655	-0.132529	0.00313776	-1.38137	-1.31565	-0.127373	0.00450041	-1.31375
1.612	0.433786	0.308027	0.732437	-1.30489	-4.65563	-4.44245	-1.42831	-0.626368	-1.68138	-1.14733	0.532574	1.07502	0.998553	1.64267	0.995863	0.808531	0.748121	-1.61511	-0.401899	-1.52256	-0.336204	-0.137947	-0.002192	-1.38762	-1.32186	-0.132791	-0.0008293	-1.31995
1.613	0.429513	0.303663	0.728358	-1.31031	-4.66326	-4.44996	-1.43381	-0.631346	-1.68705	-1.15266	0.529034	1.07176	0.995247	1.63972	0.992482	0.805136	0.744733	-1.62079	-0.407492	-1.52889	-0.341753	-0.143364	-0.0075218	-1.39387	-1.32806	-0.138208	-0.006159	-1.32616
1.614	0.425241	0.299299	0.724279	-1.31572	-4.67089	-4.45746	-1.43932	-0.636323	-1.69273	-1.15798	0.525493	1.0685	0.991941	1.63678	0.989101	0.801741	0.741345	-1.62647	-0.413085	-1.53523	-0.347302	-0.148782	-0.0128516	-1.40012	-1.33427	-0.143626	-0.0114887	-1.33236
1.615	0.420969	0.294935	0.720199	-1.32113	-4.67852	-4.46496	-1.44482	-0.6413	-1.6984	-1.16331	0.521952	1.06524	0.988635	1.63383	0.985721	0.798346	0.737958	-1.63215	-0.418678	-1.54157	-0.352851	-0.154199	-0.0181814	-1.40637	-1.34047	-0.149043	-0.0168184	-1.33857
1.616	0.416697	0.29057	0.71612	-1.32655	-4.68615	-4.47247	-1.45032	-0.646277	-1.70408	-1.16864	0.518412	1.06197	0.985329	1.63088	0.98234	0.794951	0.73457	-1.63783	-0.424271	-1.5479	-0.3584	-0.159617	-0.0235111	-1.41262	-1.34668	-0.154461	-0.0221481	-1.34478
1.617	0.412425	0.286206	0.71204	-1.33196	-4.69378	-4.47997	-1.45582	-0.651254	-1.70975	-1.17396	0.514871	1.05871	0.982023	1.62793	0.97896	0.791556	0.731182	-1.64351	-0.429864	-1.55424	-0.363949	-0.165034	-0.0288409	-1.41887	-1.35288	-0.159878	-0.0274778	-1.35098
1.618	0.408152	0.281842	0.707961	-1.33737	-4.70141	-4.48748	-1.46132	-0.656231	-1.71543	-1.17929	0.511331	1.05545	0.978717	1.62498	0.975579	0.788161	0.727795	-1.64919	-0.435457	-1.56058	-0.369498	-0.170452	-0.0341707	-1.42512	-1.35909	-0.165296	-0.0328075	-1.35719
1.619	0.40388	0.277478	0.703881	-1.34279	-4.70904	-4.49498	-1.46682	-0.661208	-1.7211	-1.18462	0.50779	1.05219	0.97541	1.62204	0.972198	0.784766	0.724407	-1.65487	-0.441049	-1.56691	-0.375047	-0.175869	-0.0395005	-1.43137	-1.36529	-0.170713	-0.0381372	-1.36339
1.62	0.399608	0.273114	0.699802	-1.3482	-4.71667	-4.50248	-1.47232	-0.666185	-1.72677	-1.18994	0.50425	1.04893	0.972104	1.61909	0.968818	0.781371	0.721019	-1.66055	-0.446642	-1.57325	-0.380596	-0.181287	-0.0448303	-1.43762	-1.3715	-0.17613	-0.0434669	-1.3696
1.621	0.395336	0.268749	0.695722	-1.35361	-4.7243	-4.50999	-1.47782	-0.671162	-1.73245	-1.19527	0.500709	1.04567	0.968798	1.61614	0.965437	0.777976	0.717631	-1.66623	-0.452235	-1.57959	-0.386145	-0.186704	-0.05016	-1.44387	-1.37771	-0.181548	-0.0487966	-1.3758
1.622	0.391064	0.264385	0.691643	-1.35903	-4.73193	-4.51749	-1.48332	-0.676139	-1.73812	-1.20059	0.497169	1.04241	0.965492	1.61319	0.962057	0.774581	0.714244	-1.67191	-0.457828	-1.58592	-0.391694	-0.192122	-0.0554898	-1.45011	-1.38391	-0.186966	-0.0541263	-1.38201
1.623	0.386792	0.260021	0.687563	-1.36444	-4.73956	-4.525	-1.48882	-0.681116	-1.7438	-1.20592	0.493628	1.03915	0.962186	1.61024	0.958676	0.771186	0.710856	-1.67759	-0.463421	-1.59226	-0.397243	-0.197539	-0.0608196	-1.45636	-1.39012	-0.192383	-0.059456	-1.38822
1.624	0.382519	0.255657	0.683484	-1.36985	-4.74719	-4.5325	-1.49432	-0.686093	-1.74947	-1.21125	0.490087	1.03589	0.95888	1.6073	0.955295	0.767791	0.707468	-1.68327	-0.469014	-1.5986	-0.402792	-0.202957	-0.0661494	-1.46261	-1.39632	-0.1978	-0.0647857	-1.39442
1.625	0.378247	0.251293	0.679404	-1.37527	-4.75482	-4.54001	-1.49982	-0.69107	-1.75515	-1.21657	0.486547	1.03263	0.955574	1.60435	0.951915	0.764396	0.70408	-1.68895	-0.474607	-1.60493	-0.408341	-0.208374	-0.0714792	-1.46886	-1.40253	-0.203218	-0.0701154	-1.40063
1.626	0.373975	0.246928	0.675325	-1.38068	-4.76244	-4.54751	-1.50532	-0.696047	-1.76082	-1.2219	0.483006	1.02937	0.952268	1.6014	0.948534	0.761001	0.700693	-1.69463	-0.4802	-1.61127	-0.41389	-0.213792	-0.0768089	-1.47511	-1.40873	-0.208636	-0.0754451	-1.40683
1.627	0.369703	0.242564	0.671245	-1.3861	-4.77007	-4.55501	-1.51082	-0.701024	-1.76649	-1.22723	0.479466	1.02611	0.948962	1.59845	0.945154	0.757606	0.697305	-1.70031	-0.485792	-1.61761	-0.419439	-0.219209	-0.0821387	-1.48136	-1.41494	-0.214053	-0.0807748	-1.41304
1.628	0.365431	0.2382	0.667166	-1.39151	-4.7777	-4.56252	-1.51632	-0.706001	-1.77217	-1.23255	0.475925	1.02285	0.945656	1.5955	0.941773	0.754211	0.693917	-1.70599	-0.491385	-1.62394	-0.424988	-0.224627	-0.0874685	-1.48761	-1.42114	-0.219471	-0.0861045	-1.41924
1.629	0.361158	0.233836	0.663086	-1.39692	-4.78533	-4.57002	-1.52182	-0.710978	-1.77784	-1.23788	0.472385	1.01959	0.94235	1.59256	0.938392	0.750816	0.690529	-1.71167	-0.496978	-1.63028	-0.430537	-0.230044	-0.0927983	-1.49386	-1.42735	-0.224888	-0.0914342	-1.42545
1.63	0.356886	0.229472	0.659007	-1.40234	-4.79296	-4.57753	-1.52732	-0.715955	-1.78352	-1.2432	0.468844	1.01633	0.939044	1.58961	0.935012	0.747421	0.687142	-1.71735	-0.502571	-1.63662	-0.436086	-0.235462	-0.0981281	-1.50011	-1.43356	-0.230305	-0.096764	-1.43166
1.631	0.352614	0.225107	0.654927	-1.40775	-4.80059	-4.58503	-1.53282	-0.720933	-1.78919	-1.24853	0.465303	1.01306	0.935737	1.58666	0.931631	0.744026	0.683754	-1.72303	-0.508164	-1.64295	-0.441635	-0.240879	-0.103458	-1.50636	-1.43976	-0.235723	-0.102094	-1.43786
1.632	0.348342	0.220743	0.650848	-1.41316	-4.80822	-4.59253	-1.53832	-0.72591	-1.79487	-1.25386	0.461763	1.0098	0.932431	1.58371	0.928251	0.740631	0.680366	-1.72871	-0.513757	-1.64929	-0.447184	-0.246297	-0.108788	-1.51261	-1.44597	-0.24114	-0.107423	-1.44407
1.633	0.34407	0.216379	0.646768	-1.41858	-4.81585	-4.60004	-1.54382	-0.730887	-1.80054	-1.25918	0.458222	1.00654	0.929125	1.58076	0.92487	0.737236	0.676978	-1.73439	-0.51935	-1.65562	-0.452733	-0.251714	-0.114117	-1.51885	-1.45217	-0.246558	-0.112753	-1.45027
1.634	0.339797	0.212015	0.642689	-1.42399	-4.82348	-4.60754	-1.54932	-0.735864	-1.80622	-1.26451	0.454682	1.00328	0.925819	1.57781	0.921489	0.733841	0.673591	-1.74007	-0.524942	-1.66196	-0.458282	-0.257132	-0.119447	-1.5251	-1.45838	-0.251975	-0.118083	-1.45648
1.635	0.335525	0.207651	0.638609	-1.4294	-4.83111	-4.61505	-1.55482	-0.740841	-1.81189	-1.26984	0.451141	1.00002	0.922513	1.57487	0.918109	0.730446	0.670203	-1.74575	-0.530535	-1.6683	-0.463831	-0.262549	-0.124777	-1.53135	-1.46458	-0.257393	-0.123412	-1.46268
1.636	0.331253	0.203286	0.63453	-1.43482	-4.83874	-4.62255	-1.56032	-0.745818	-1.81756	-1.27516	0.447601	0.996761	0.919207	1.57192	0.914728	0.727051	0.666815	-1.75143	-0.536128	-1.67463	-0.46938	-0.267967	-0.130107	-1.5376	-1.47079	-0.26281	-0.128742	-1.46889
1.637	0.326981	0.198922	0.630451	-1.44023	-4.84637	-4.63006	-1.56583	-0.750795	-1.82324	-1.28049	0.44406	0.9935	0.915901	1.56897	0.911347	0.723656	0.663427	-1.75711	-0.541721	-1.68097	-0.474929	-0.273384	-0.135436	-1.54385	-1.47699	-0.268228	-0.134072	-1.4751
1.638	0.322709	0.194558	0.626371	-1.44564	-4.854	-4.63756	-1.57133	-0.755772	-1.82891	-1.28582	0.440519	0.990239	0.912595	1.56602	0.907967	0.720261	0.66004	-1.76279	-0.547314	-1.68731	-0.480478	-0.278802	-0.140766	-1.5501	-1.4832	-0.273645	-0.139402	-1.4813
1.639	0.318436	0.190194	0.622292	-1.45106	-4.86163	-4.64506	-1.57683	-0.760749	-1.83459	-1.29114	0.436979	0.986979	0.909289	1.56307	0.904586	0.716866	0.656652	-1.76847	-0.552907	-1.69364	-0.486028	-0.284219	-0.146096	-1.55635	-1.48941	-0.279063	-0.144731	-1.48751
1.64	0.314164	0.18583	0.618212	-1.45647	-4.86926	-4.65257	-1.58233	-0.765726	-1.84026	-1.29647	0.433438	0.983718	0.905983	1.56013	0.901206	0.713471	0.653264	-1.77415	-0.5585	-1.69998	-0.491577	-0.289637	-0.151426	-1.5626	-1.49561	-0.28448	-0.150061	-1.49371
1.641	0.309892	0.181465	0.614133	-1.46188	-4.87689	-4.66007	-1.58783	-0.770703	-1.84594	-1.30179	0.429898	0.980457	0.902676	1.55718	0.897825	0.710076	0.649876	-1.77983	-0.564093	-1.70632	-0.497125	-0.295054	-0.156756	-1.56885	-1.50182	-0.289898	-0.155391	-1.49992
1.642	0.30562	0.177101	0.610053	-1.4673	-4.88452	-4.66758	-1.59333	-0.77568	-1.85161	-1.30712	0.426357	0.977197	0.89937	1.55423	0.894444	0.706681	0.646489	-1.78551	-0.569685	-1.71265	-0.502675	-0.300472	-0.162085	-1.5751	-1.50802	-0.295315	-0.16072	-1.50612
1.643	0.301348	0.172737	0.605974	-1.47271	-4.89215	-4.67508	-1.59883	-0.780657	-1.85728	-1.31245	0.422817	0.973936	0.896064	1.55128	0.891064	0.703286	0.643101	-1.79119	-0.575278	-1.71899	-0.508224	-0.305889	-0.167415	-1.58135	-1.51423	-0.300733	-0.16605	-1.51233
1.644	0.297076	0.168373	0.601894	-1.47812	-4.89978	-4.68259	-1.60433	-0.785634	-1.86296	-1.31777	0.419276	0.970675	0.892758	1.54833	0.887683	0.699891	0.639713	-1.79687	-0.580871	-1.72533	-0.513773	-0.311306	-0.172745	-1.58759	-1.52043	-0.30615	-0.17138	-1.51854
1.645	0.292803	0.164009	0.597815	-1.48354	-4.90741	-4.69009	-1.60983	-0.790611	-1.86863	-1.3231	0.415735	0.967414	0.889452	1.54538	0.884302	0.696496	0.636325	-1.80255	-0.586464	-1.73166	-0.519322	-0.316724	-0.178075	-1.59384	-1.52664	-0.311568	-0.176709	-1.52474
1.646	0.288531	0.159644	0.593735	-1.48895	-4.91504	-4.69759	-1.61533	-0.795588	-1.87431	-1.32843	0.412195	0.964154	0.886146	1.54244	0.880922	0.693101	0.632938	-1.80823	-0.592057	-1.738	-0.524871	-0.322142	-0.183404	-1.60009	-1.53285	-0.316985	-0.182039	-1.53095
1.647	0.284259	0.15528	0.589656	-1.49436	-4.92267	-4.7051	-1.62083	-0.800566	-1.87998	-1.33375	0.408654	0.960893	0.88284	1.53949	0.877541	0.689706	0.62955	-1.81391	-0.59765	-1.74434	-0.53042	-0.327559	-0.188734	-1.60634	-1.53905	-0.322403	-0.187369	-1.53715
1.648	0.279987	0.150916	0.585576	-1.49978	-4.9303	-4.7126	-1.62633	-0.805543	-1.88566	-1.33908	0.405114	0.957632	0.879534	1.53654	0.87416	0.686311	0.626162	-1.8196	-0.603243	-1.75067	-0.535969	-0.332977	-0.194064	-1.61259	-1.54526	-0.32782	-0.192699	-1.54336
1.649	0.275715	0.146552	0.581497	-1.50519	-4.93793	-4.72011	-1.63183	-0.81052	-1.89133	-1.3444	0.401573	0.954371	0.876227	1.53359	0.87078	0.682915	0.622774	-1.82528	-0.608835	-1.75701	-0.541518	-0.338394	-0.199394	-1.61884	-1.55146	-0.333238	-0.198028	-1.54956
1.65	0.271442	0.142188	0.577417	-1.5106	-4.94556	-4.72761	-1.63733	-0.815497	-1.897	-1.34973	0.398033	0.951111	0.872921	1.53064	0.867399	0.67952	0.619387	-1.83096	-0.614428	-1.76335	-0.547067	-0.343811	-0.204724	-1.62509	-1.55767	-0.338655	-0.203358	-1.55577
1.651	0.26717	0.137823	0.573338	-1.51602	-4.95319	-4.73511	-1.64283	-0.820474	-1.90268	-1.35506	0.394492	0.94785	0.869615	1.52769	0.864019	0.676125	0.615999	-1.83664	-0.620021	-1.76968	-0.552616	-0.349229	-0.210053	-1.63134	-1.56387	-0.344073	-0.208688	-1.56198
1.652	0.262898	0.133459	0.569258	-1.52143	-4.96082	-4.74262	-1.64833	-0.825451	-1.90835	-1.36038	0.390951	0.944589	0.866309	1.52474	0.860638	0.67273	0.612611	-1.84232	-0.625614	-1.77602	-0.558165	-0.354646	-0.215383	-1.63759	-1.57008	-0.34949	-0.214017	-1.56818
1.653	0.258626	0.129095	0.565179	-1.52685	-4.96845	-4.75012	-1.65383	-0.830428	-1.91403	-1.36571	0.387411	0.941328	0.863003	1.5218	0.857257	0.669335	0.609223	-1.848	-0.631207	-1.78236	-0.563714	-0.360064	-0.220713	-1.64384	-1.57628	-0.354908	-0.219347	-1.57439
1.654	0.254354	0.124731	0.561099	-1.53226	-4.97608	-4.75763	-1.65933	-0.835405	-1.9197	-1.37104	0.38387	0.938068	0.859697	1.51885	0.853877	0.66594	0.605836	-1.85368	-0.6368	-1.78869	-0.569263	-0.365482	-0.226043	-1.65009	-1.58249	-0.360325	-0.224677	-1.58059
1.655	0.250081	0.120367	0.55702	-1.53767	-4.98371	-4.76513	-1.66483	-0.840382	-1.92538	-1.37636	0.38033	0.934807	0.856391	1.5159	0.850496	0.662545	0.602448	-1.85936	-0.642393	-1.79503	-0.574812	-0.370899	-0.231373	-1.65633	-1.5887	-0.365743	-0.230007	-1.5868
1.656	0.245809	0.116002	0.55294	-1.54309	-4.99134	-4.77264	-1.67033	-0.845359	-1.93105	-1.38169	0.376789	0.931546	0.853084	1.51295	0.847115	0.65915	0.59906	-1.86504	-0.647986	-1.80136	-0.580361	-0.376316	-0.236702	-1.66258	-1.5949	-0.37116	-0.235336	-1.593
1.657	0.241537	0.111638	0.548861	-1.5485	-4.99897	-4.78014	-1.67583	-0.850336	-1.93673	-1.38702	0.373248	0.928285	0.849778	1.51	0.843735	0.655755	0.595672	-1.87072	-0.653578	-1.8077	-0.58591	-0.381734	-0.242032	-1.66883	-1.60111	-0.376578	-0.240666	-1.59921
1.658	0.237265	0.107274	0.544781	-1.55391	-5.0066	-4.78764	-1.68133	-0.855313	-1.9424	-1.39234	0.369708	0.925025	0.846472	1.50705	0.840354	0.65236	0.592284	-1.8764	-0.659171	-1.81404	-0.591459	-0.387151	-0.247362	-1.67508	-1.60731	-0.381995	-0.245996	-1.60542
1.659	0.232993	0.10291	0.540702	-1.55933	-5.01423	-4.79515	-1.68684	-0.86029	-1.94807	-1.39767	0.366167	0.921764	0.843166	1.50411	0.836973	0.648965	0.588897	-1.88208	-0.664764	-1.82037	-0.597008	-0.392569	-0.252692	-1.68133	-1.61352	-0.387413	-0.251325	-1.61162
1.66	0.22872	0.0985455	0.536622	-1.56474	-5.02186	-4.80265	-1.69234	-0.865267	-1.95375	-1.40299	0.362627	0.918503	0.83986	1.50116	0.833593	0.64557	0.585509	-1.88776	-0.670357	-1.82671	-0.602557	-0.397986	-0.258021	-1.68758	-1.61972	-0.39283	-0.256655	-1.61783
1.661	0.224448	0.0941813	0.532543	-1.57015	-5.02949	-4.81016	-1.69784	-0.870244	-1.95942	-1.40832	0.359086	0.915242	0.836554	1.49821	0.830212	0.642175	0.582121	-1.89344	-0.67595	-1.83305	-0.608106	-0.403404	-0.263351	-1.69383	-1.62593	-0.398248	-0.261985	-1.62403
1.662	0.220176	0.0898171	0.528464	-1.57557	-5.03712	-4.81766	-1.70334	-0.875221	-1.9651	-1.41365	0.355546	0.911981	0.833248	1.49526	0.826831	0.63878	0.578733	-1.89912	-0.681543	-1.83938	-0.613655	-0.408821	-0.268681	-1.70008	-1.63213	-0.403665	-0.267314	-1.63024
1.663	0.215904	0.0854529	0.524384	-1.58098	-5.04475	-4.82516	-1.70884	-0.880198	-1.97077	-1.41897	0.352005	0.908721	0.829941	1.49231	0.823451	0.635385	0.575346	-1.9048	-0.687136	-1.84572	-0.619204	-0.414239	-0.274011	-1.70633	-1.63834	-0.409083	-0.272644	-1.63645
1.664	0.211632	0.0810887	0.520305	-1.58639	-5.05238	-4.83267	-1.71434	-0.885176	-1.97645	-1.4243	0.348464	0.90546	0.826635	1.48936	0.82007	0.63199	0.571958	-1.91048	-0.692729	-1.85206	-0.624753	-0.419656	-0.279341	-1.71258	-1.64455	-0.4145	-0.277974	-1.64265
1.665	0.20736	0.0767245	0.516225	-1.59181	-5.06001	-4.84017	-1.71984	-0.890153	-1.98212	-1.42963	0.344924	0.902199	0.823329	1.48641	0.816689	0.628595	0.56857	-1.91616	-0.698321	-1.85839	-0.630302	-0.425074	-0.28467	-1.71883	-1.65075	-0.419918	-0.283304	-1.64886
1.666	0.203087	0.0723603	0.512146	-1.59722	-5.06764	-4.84768	-1.72534	-0.89513	-1.98779	-1.43495	0.341383	0.898938	0.820023	1.48347	0.813309	0.6252	0.565182	-1.92184	-0.703914	-1.86473	-0.635851	-0.430491	-0.29	-1.72507	-1.65696	-0.425335	-0.288633	-1.65506
1.667	0.198815	0.0679961	0.508066	-1.60263	-5.07527	-4.85518	-1.73084	-0.900107	-1.99347	-1.44028	0.337843	0.895678	0.816717	1.48052	0.809928	0.621805	0.561795	-1.92752	-0.709507	-1.87107	-0.6414	-0.435909	-0.29533	-1.73132	-1.66316	-0.430753	-0.293963	-1.66127
1.668	0.194543	0.0636319	0.503987	-1.60805	-5.0829	-4.86269	-1.73634	-0.905084	-1.99914	-1.4456	0.334302	0.892417	0.813411	1.47757	0.806547	0.61841	0.558407	-1.9332	-0.7151	-1.8774	-0.646949	-0.441326	-0.30066	-1.73757	-1.66937	-0.43617	-0.299293	-1.66747
1.669	0.190271	0.0592677	0.499907	-1.61346	-5.09053	-4.87019	-1.74184	-0.910061	-2.00482	-1.45093	0.330761	0.889156	0.810105	1.47462	0.803167	0.615015	0.555019	-1.93888	-0.720693	-1.88374	-0.652498	-0.446744	-0.30599	-1.74382	-1.67557	-0.441588	-0.304622	-1.67368
1.67	0.185999	0.0549035	0.495828	-1.61887	-5.09816	-4.87769	-1.74734	-0.915038	-2.01049	-1.45626	0.327221	0.885895	0.806798	1.47167	0.799786	0.61162	0.551631	-1.94456	-0.726286	-1.89008	-0.658047	-0.452161	-0.311319	-1.75007	-1.68178	-0.447005	-0.309952	-1.67989
1.671	0.181726	0.0505393	0.491748	-1.62429	-5.10579	-4.8852	-1.75284	-0.920015	-2.01617	-1.46158	0.32368	0.882634	0.803492	1.46872	0.796405	0.608225	0.548243	-1.95024	-0.731879	-1.89641	-0.663597	-0.457579	-0.316649	-1.75632	-1.68798	-0.452423	-0.315282	-1.68609
1.672	0.177454	0.0461751	0.487669	-1.6297	-5.11342	-4.8927	-1.75834	-0.924992	-2.02184	-1.46691	0.32014	0.879374	0.800186	1.46577	0.793025	0.60483	0.544856	-1.95592	-0.737471	-1.90275	-0.669145	-0.462996	-0.321979	-1.76257	-1.69419	-0.45784	-0.320611	-1.6923
1.673	0.173182	0.0418109	0.483589	-1.63511	-5.12105	-4.90021	-1.76384	-0.929969	-2.02751	-1.47224	0.316599	0.876113	0.79688	1.46283	0.789644	0.601435	0.541468	-1.9616	-0.743064	-1.90909	-0.674694	-0.468414	-0.327309	-1.76882	-1.7004	-0.463258	-0.325941	-1.6985
1.674	0.16891	0.0374467	0.47951	-1.64053	-5.12868	-4.90771	-1.76934	-0.934946	-2.03319	-1.47756	0.313058	0.872852	0.793574	1.45988	0.786263	0.59804	0.53808	-1.96728	-0.748657	-1.91542	-0.680244	-0.473831	-0.332638	-1.77507	-1.7066	-0.468675	-0.331271	-1.70471
1.675	0.164638	0.0330825	0.47543	-1.64594	-5.13631	-4.91521	-1.77484	-0.939923	-2.03886	-1.48289	0.309518	0.869591	0.790268	1.45693	0.782882	0.594645	0.534692	-1.97296	-0.75425	-1.92176	-0.685793	-0.479249	-0.337968	-1.78132	-1.71281	-0.474093	-0.336601	-1.71091
1.676	0.160365	0.0287183	0.471351	-1.65135	-5.14394	-4.92272	-1.78034	-0.9449	-2.04454	-1.48821	0.305977	0.866331	0.786961	1.45398	0.779502	0.59125	0.531305	-1.97864	-0.759843	-1.9281	-0.691342	-0.484666	-0.343298	-1.78757	-1.71901	-0.47951	-0.34193	-1.71712
1.677	0.156093	0.0243541	0.467271	-1.65677	-5.15157	-4.93022	-1.78584	-0.949877	-2.05021	-1.49354	0.302437	0.86307	0.783655	1.45103	0.776121	0.587854	0.527917	-1.98432	-0.765436	-1.93443	-0.696891	-0.490084	-0.348628	-1.79381	-1.72522	-0.484928	-0.34726	-1.72333
1.678	0.151821	0.0199899	0.463192	-1.66218	-5.1592	-4.93773	-1.79134	-0.954854	-2.05589	-1.49887	0.298896	0.859809	0.780349	1.44808	0.77274	0.584459	0.524529	-1.99	-0.771029	-1.94077	-0.70244	-0.495501	-0.353957	-1.80006	-1.73142	-0.490345	-0.35259	-1.72953
1.679	0.147549	0.0156257	0.459112	-1.6676	-5.16683	-4.94523	-1.79684	-0.959831	-2.06156	-1.50419	0.295356	0.856548	0.777043	1.44513	0.76936	0.581064	0.521141	-1.99568	-0.776622	-1.9471	-0.707989	-0.500919	-0.359287	-1.80631	-1.73763	-0.495763	-0.357919	-1.73574
1.68	0.143277	0.0112615	0.455033	-1.67301	-5.17446	-4.95274	-1.80234	-0.964808	-2.06723	-1.50952	0.291815	0.853287	0.773737	1.44218	0.765979	0.577669	0.517753	-2.00136	-0.782214	-1.95344	-0.713538	-0.506336	-0.364617	-1.81256	-1.74383	-0.50118	-0.363249	-1.74194
[truncated: 26,320 more rows]

## Sheet: FigS4_B
Time	viral RNA load	Uninfected cell ratio
0	3.31387	1
0.001	3.35674	0.999962
0.002	3.39961	0.99992
0.003	3.44247	0.999874
0.004	3.48534	0.999824
0.005	3.52821	0.999767
0.006	3.57107	0.999706
0.007	3.61393	0.999637
0.008	3.65679	0.999562
[truncated: 27,992 more rows]

## Sheet: FigS4_C
Time	viral RNA load	Uninfected cell ratio
[truncated: 28,001 more rows]

[truncated: 6 more sheets: FigS4_D, FigS4_E(point), FigS4_E(line), FigS4_F, FigS4_G, FigS4_H]
