# Supplementary material for: Incomplete antiviral treatment may induce longer durations of viral shedding during SARS-CoV-2 infection
Source: Life Sci Alliance. 2021 Aug 3;4(10):e202101049. doi: 10.26508/lsa.202101049 (PMC8340032; doi:10.26508/lsa.202101049)
Supplement: Supplementary file 11 [file LSA-2021-01049_TableS5.docx]

**Table S5. Estimated parameters (fixed effect) for SARS-CoV-2 infection in nose and throat by fitting the viral dynamics with multiple target cell**

| Parameter Name | Symbol (Unit) | Nose | Throat | BAL |
| --- | --- | --- | --- | --- |
| Maximum rate constant for viral replication for first target cell | (day-1) |  |  |  |
| Maximum rate constant for viral replication for second target cell | (day-1) |  | | |
| Rate constant for virus infection for first target cell | copies/ml)-1 day-1) |  |  |  |
| Rate constant for virus infection for second target cell | copies/ml)-1 day-1) |  | | |
| Death rate of infected cells | (day-1) |  | | |
| Efficacy of blocking virus production by RDV |  |  | | |
| Viral load at virus inoculation | (copies/ml) |  | | |
| Relative fraction of first uninfected target cell population at virus inoculation |  |  | | |
| Relative fraction of second uninfected target cell population at virus inoculation |  |  | | |
